# Supplementary material for: <strong>Mathematical Modeling of the Development of Confirmed Daily Infection Numbers in the COVID-19 Pandemic by a Special Exponential Function</strong>
Source: Preprints.org preprint supplement (doi:10.20944/preprints202011.0531.v1), 2020-11-20

# Mathematical modeling of the development of confirmed daily infection numbers in the COVID-19 pandemic by a special exponential function

Egbert Keller, Johannes Keller, and Matthias Selg

## Supplementary Material III

Diagrams of successful modeling attempts with three functions of type (1)

$$\hat{I}(t) = \hat{I}(0) e^{(ae^{-bt})t} \quad (1)$$

By an automatic procedure, daily infection number developments in all a) countries and b) US counties monitored by JHU [9] were modeled using a linear combination of three functions of type (1) (status: end of June, 2020). The diagrams of those modeling attempts leading to an  $R^2$  value (a)  $> 0.977$ , (b)  $> 0.970$ . The diagrams of those modeling attempts leading to an  $R^2$  value  $> 0.97$  (for the 7-days averaged data) are shown in the following. As in Fig. 1 of the paper, function parameters for raw data (left diagram) and for 7-days averaged data were determined separately (while for Fig. 2 parameters were determined for 7-days averaged data only).

Albania ( $R^2 = 0.852$ )  
(i: 10.2, a: 0.134, b: 0.089, t: 10.4)  
(i: 1.3, a: 2.0, b: 0.319, t: 40.7)  
(i: 54.8, a: 0.001, b: 0.215, t: 110.8)

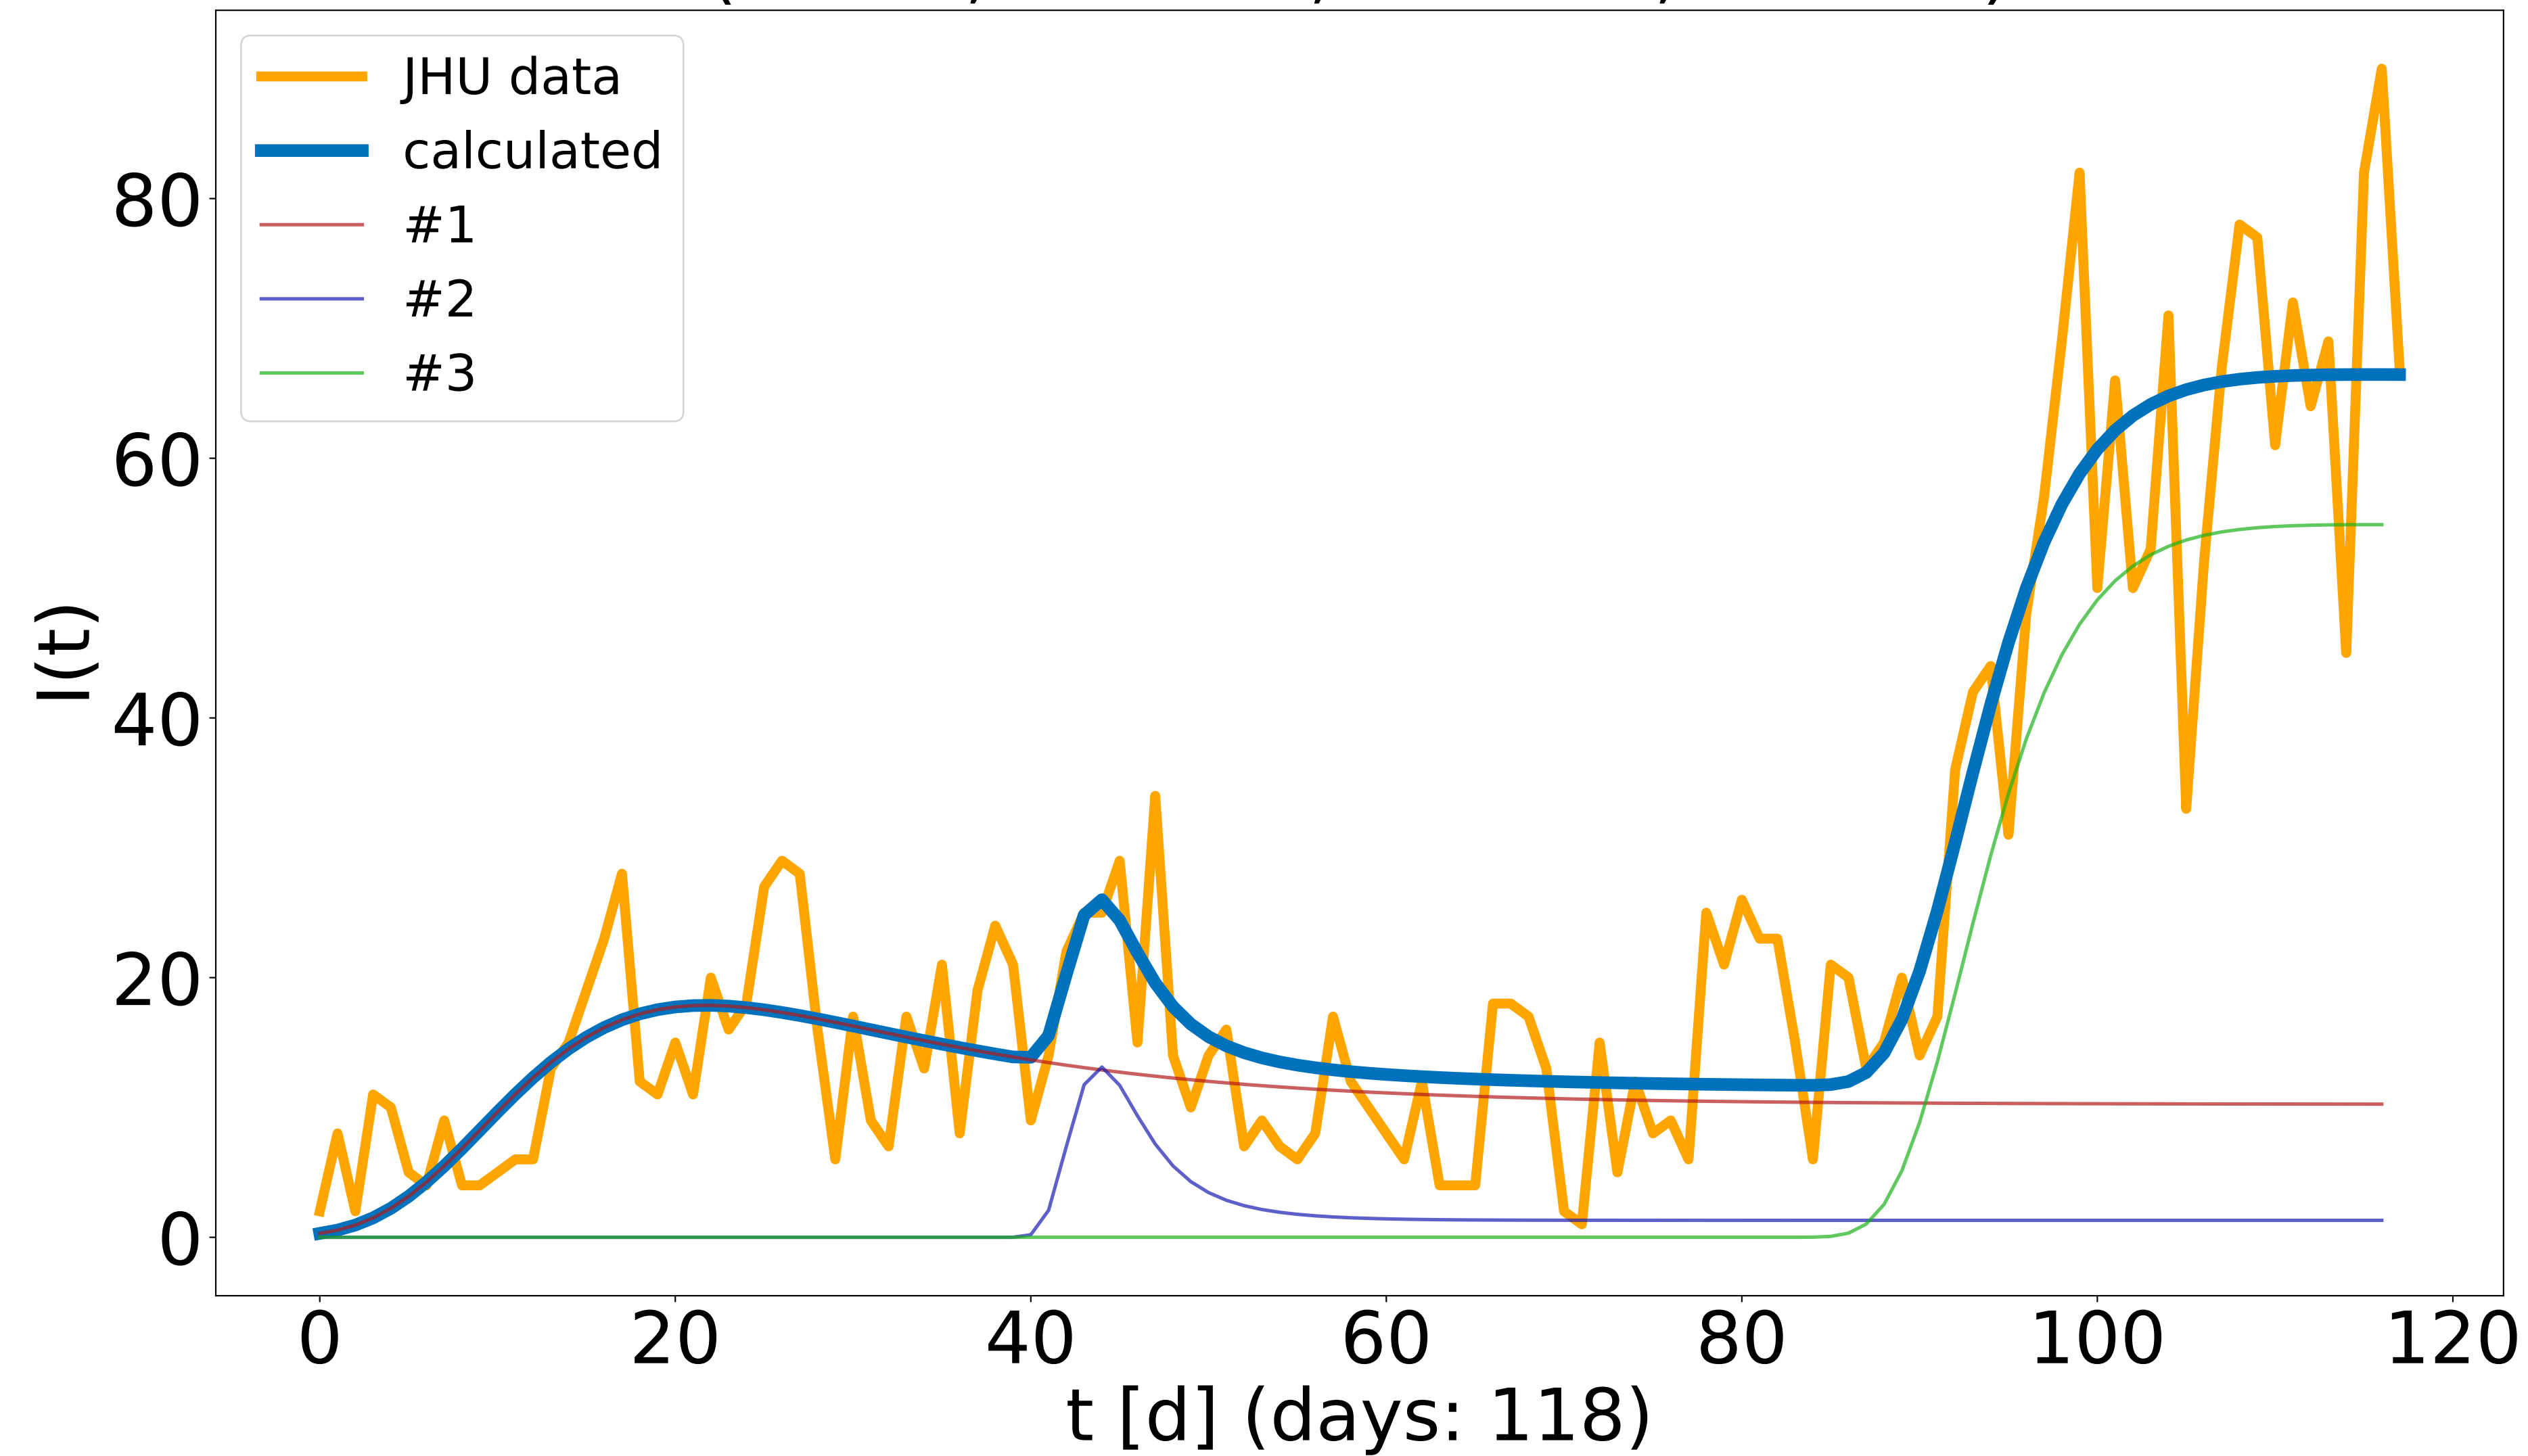

Albania ( $R^2 = 0.978$ )  
(i: 3.2, a: 0.171, b: 0.036, t: 1.0)  
(i: 16.6, a: 0.345, b: 0.31, t: 94.6)  
(i: 68.6, a: 0.006, b: 0.029, t: 140.0)

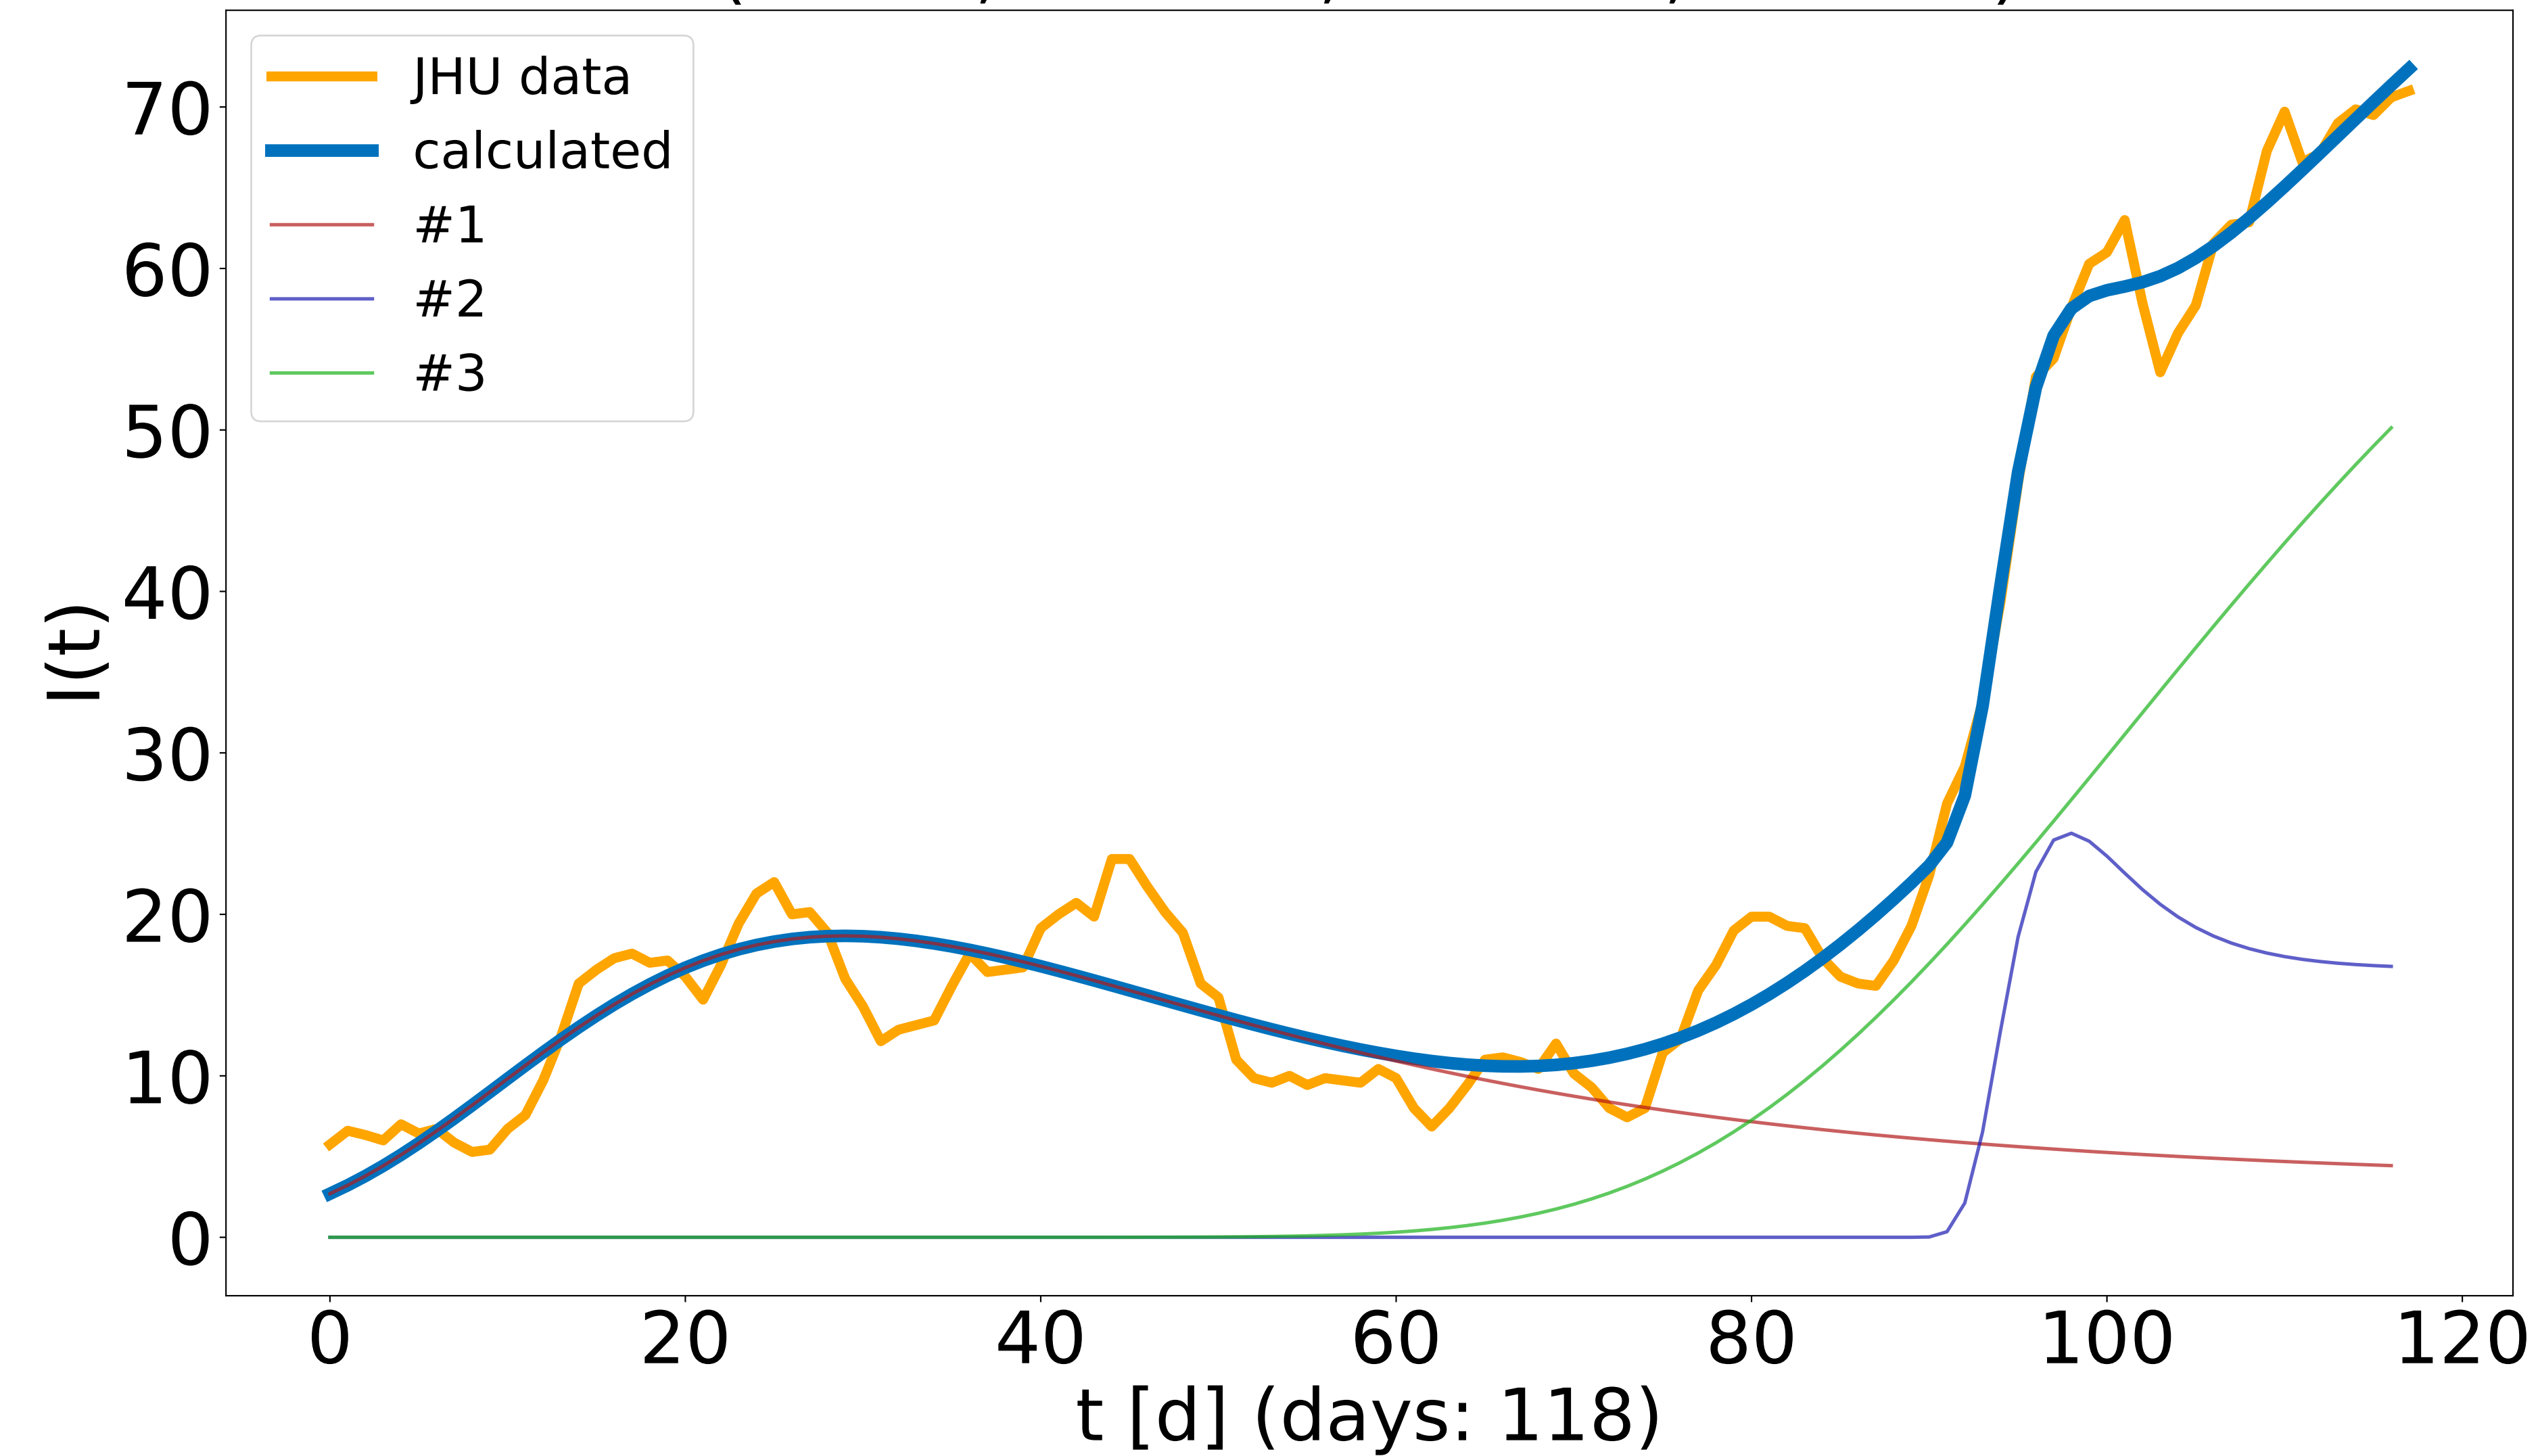

Algeria ( $R^2 = 0.958$ )  
(i: 0.1, a: 0.899, b: 0.048, t: 16.3)  
(i: 0.1, a: 0.363, b: 0.018, t: 22.0)  
(i: 0.1, a: 0.536, b: 0.023, t: 97.3)

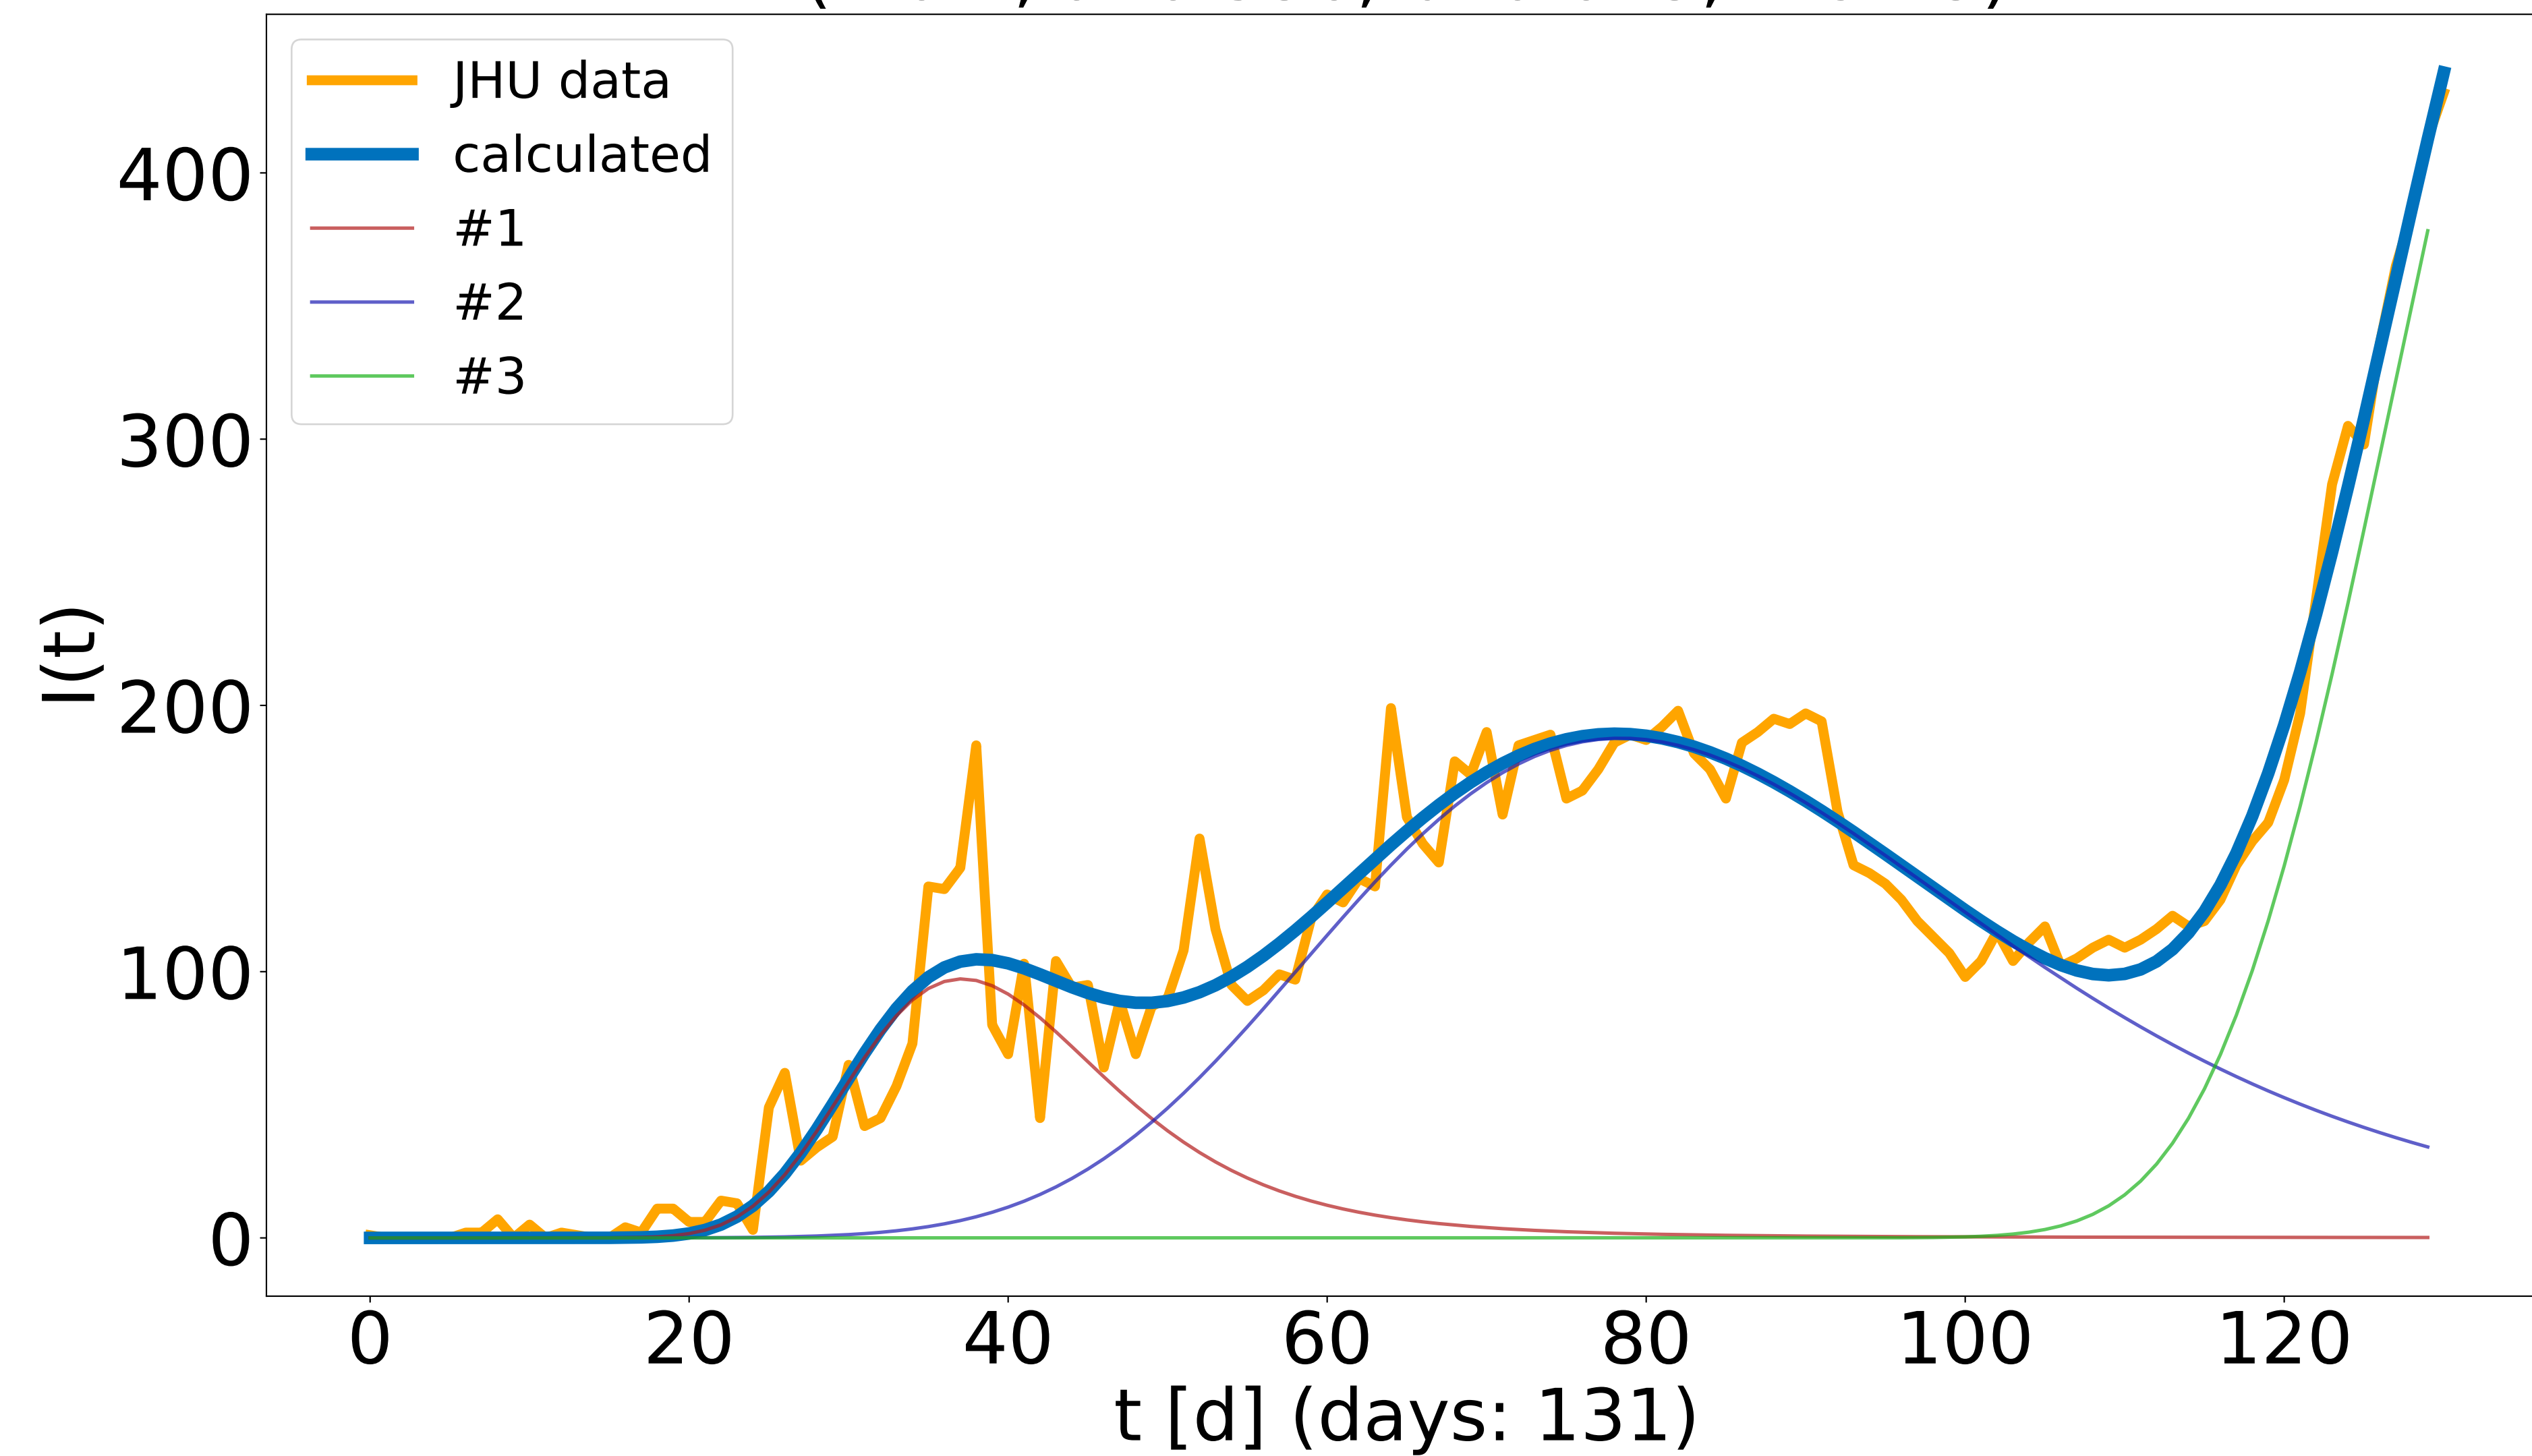

Algeria ( $R^2 = 0.99$ )  
(i: 0.1, a: 0.818, b: 0.044, t: 14.6)  
(i: 0.1, a: 0.363, b: 0.018, t: 22.4)  
(i: 0.1, a: 0.575, b: 0.025, t: 98.0)

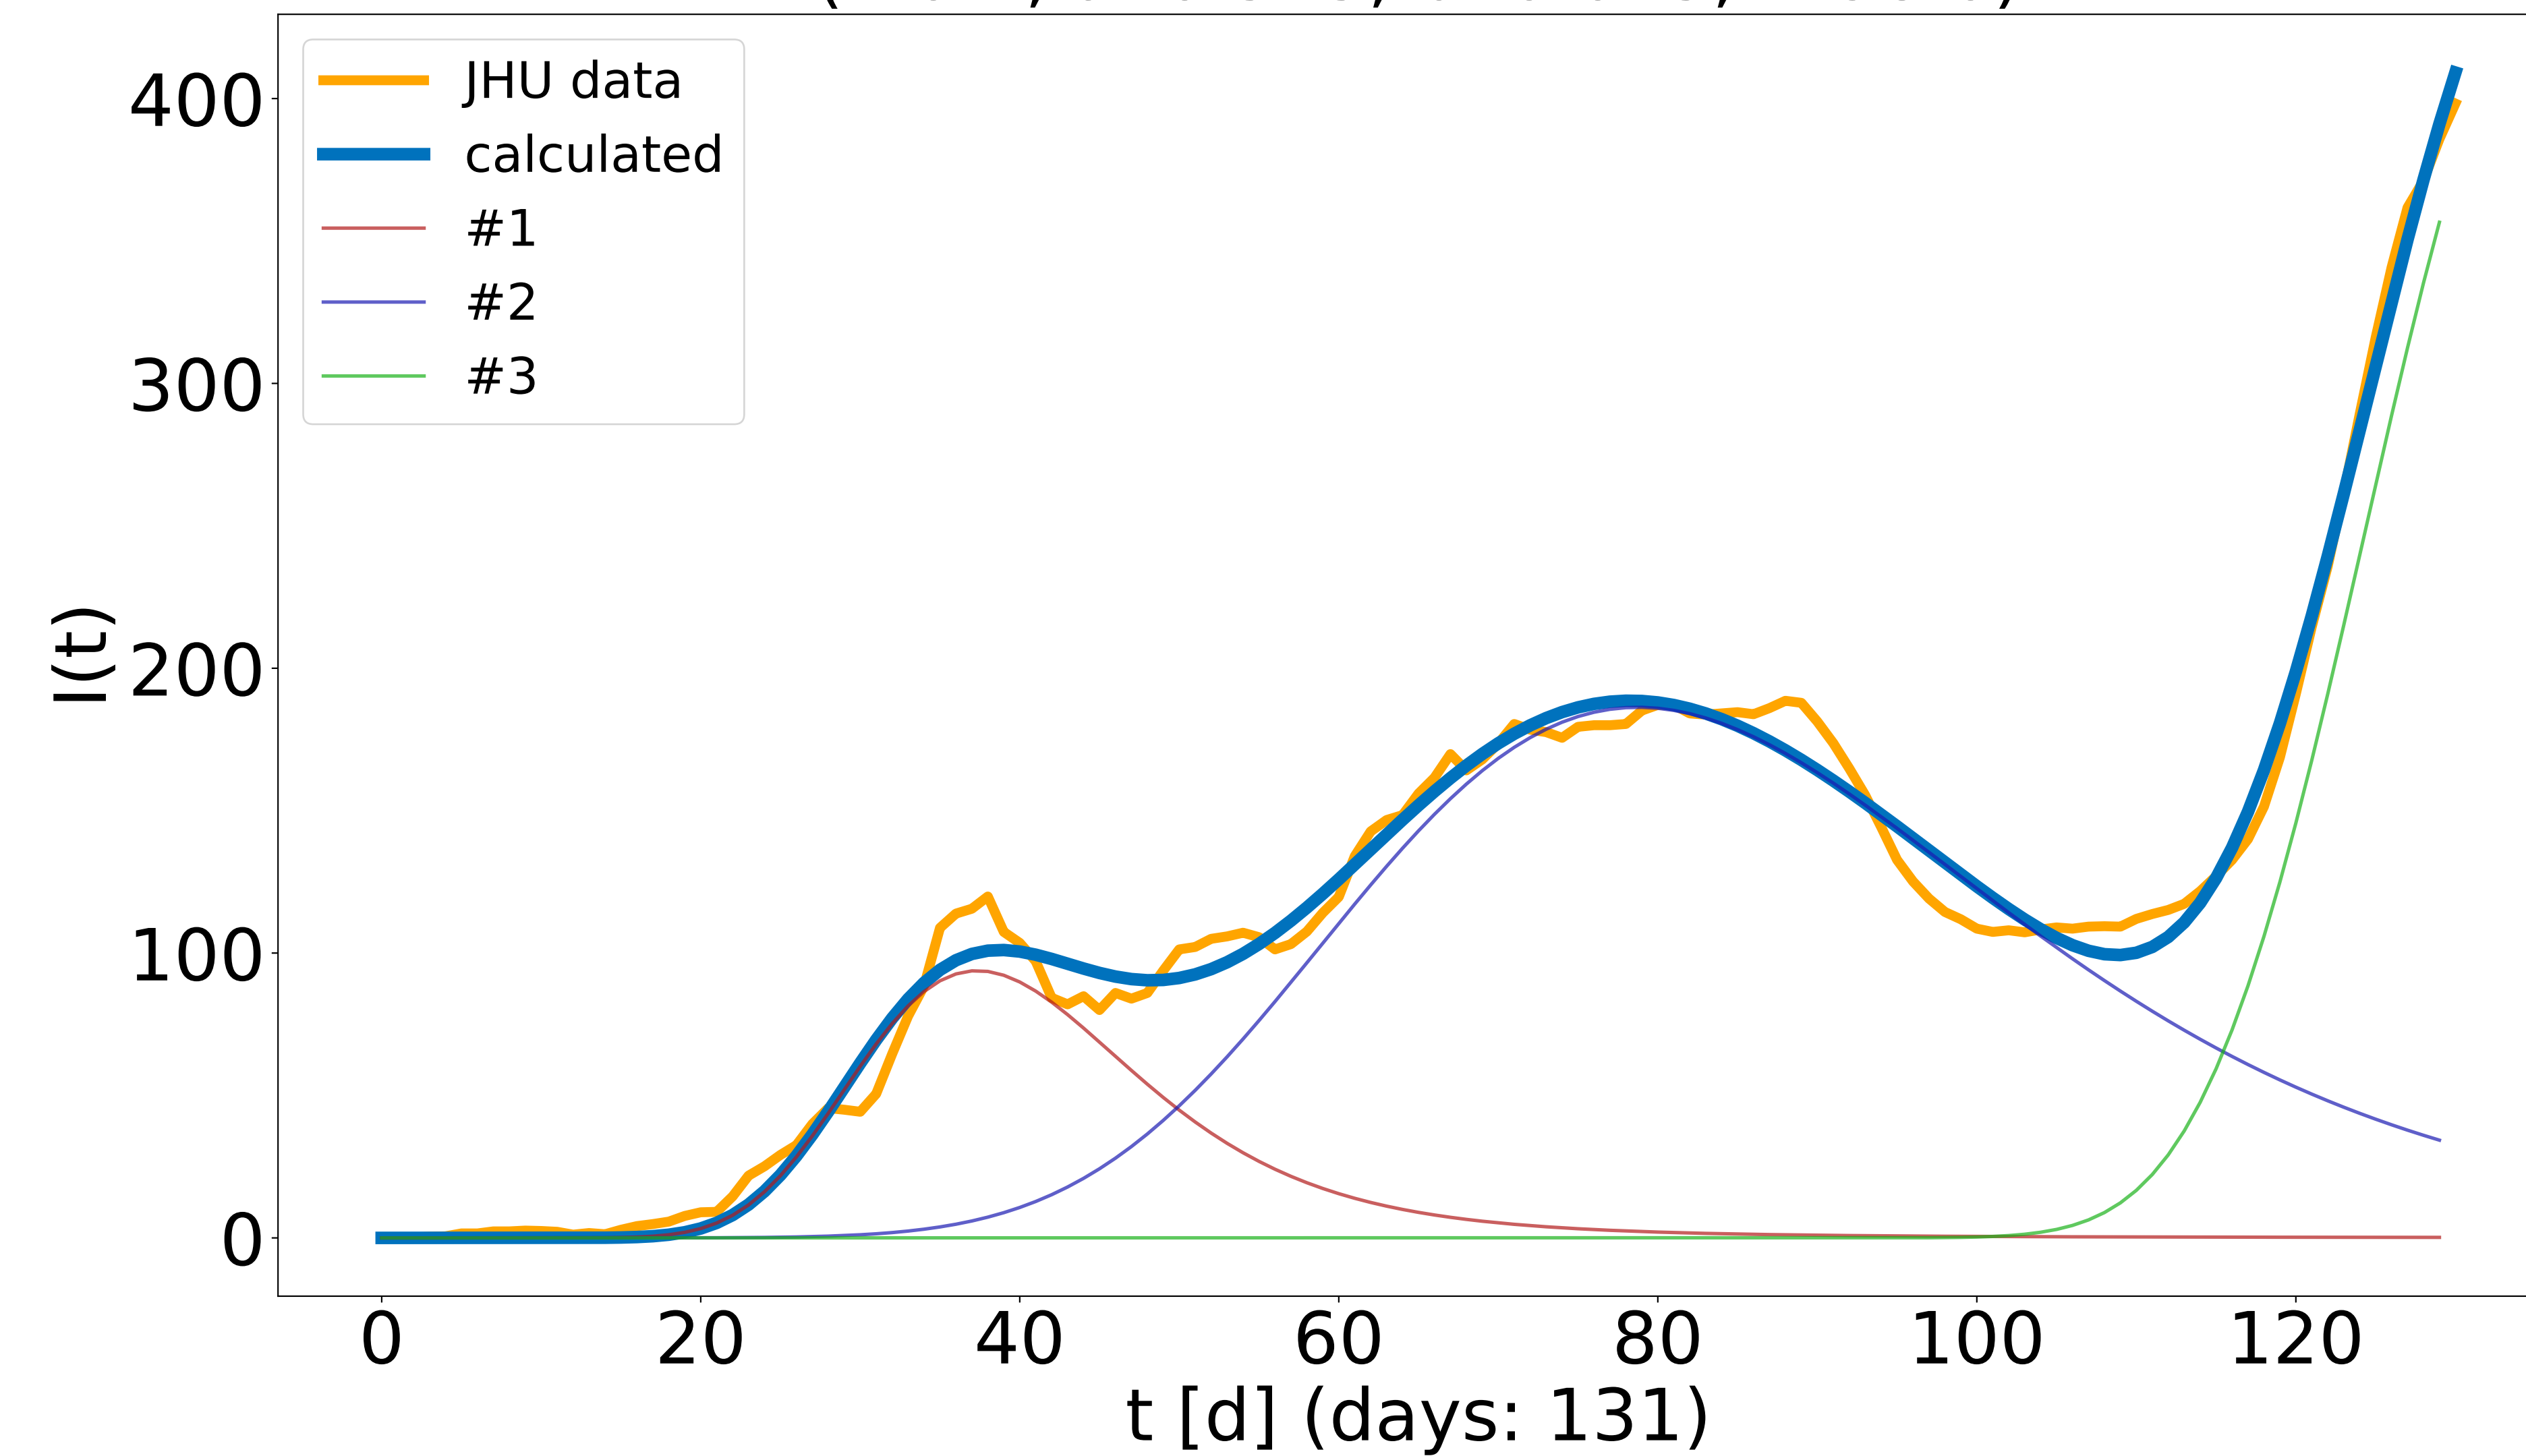

Bosnia and Herzegovina ( $R^2 = 0.393$ )  
(i: 0.2, a: 0.453, b: 0.031, t: 1.0)  
(i: 16.4, a: 2.0, b: 0.682, t: 54.0)  
(i: 0.1, a: 0.568, b: 0.03, t: 85.9)

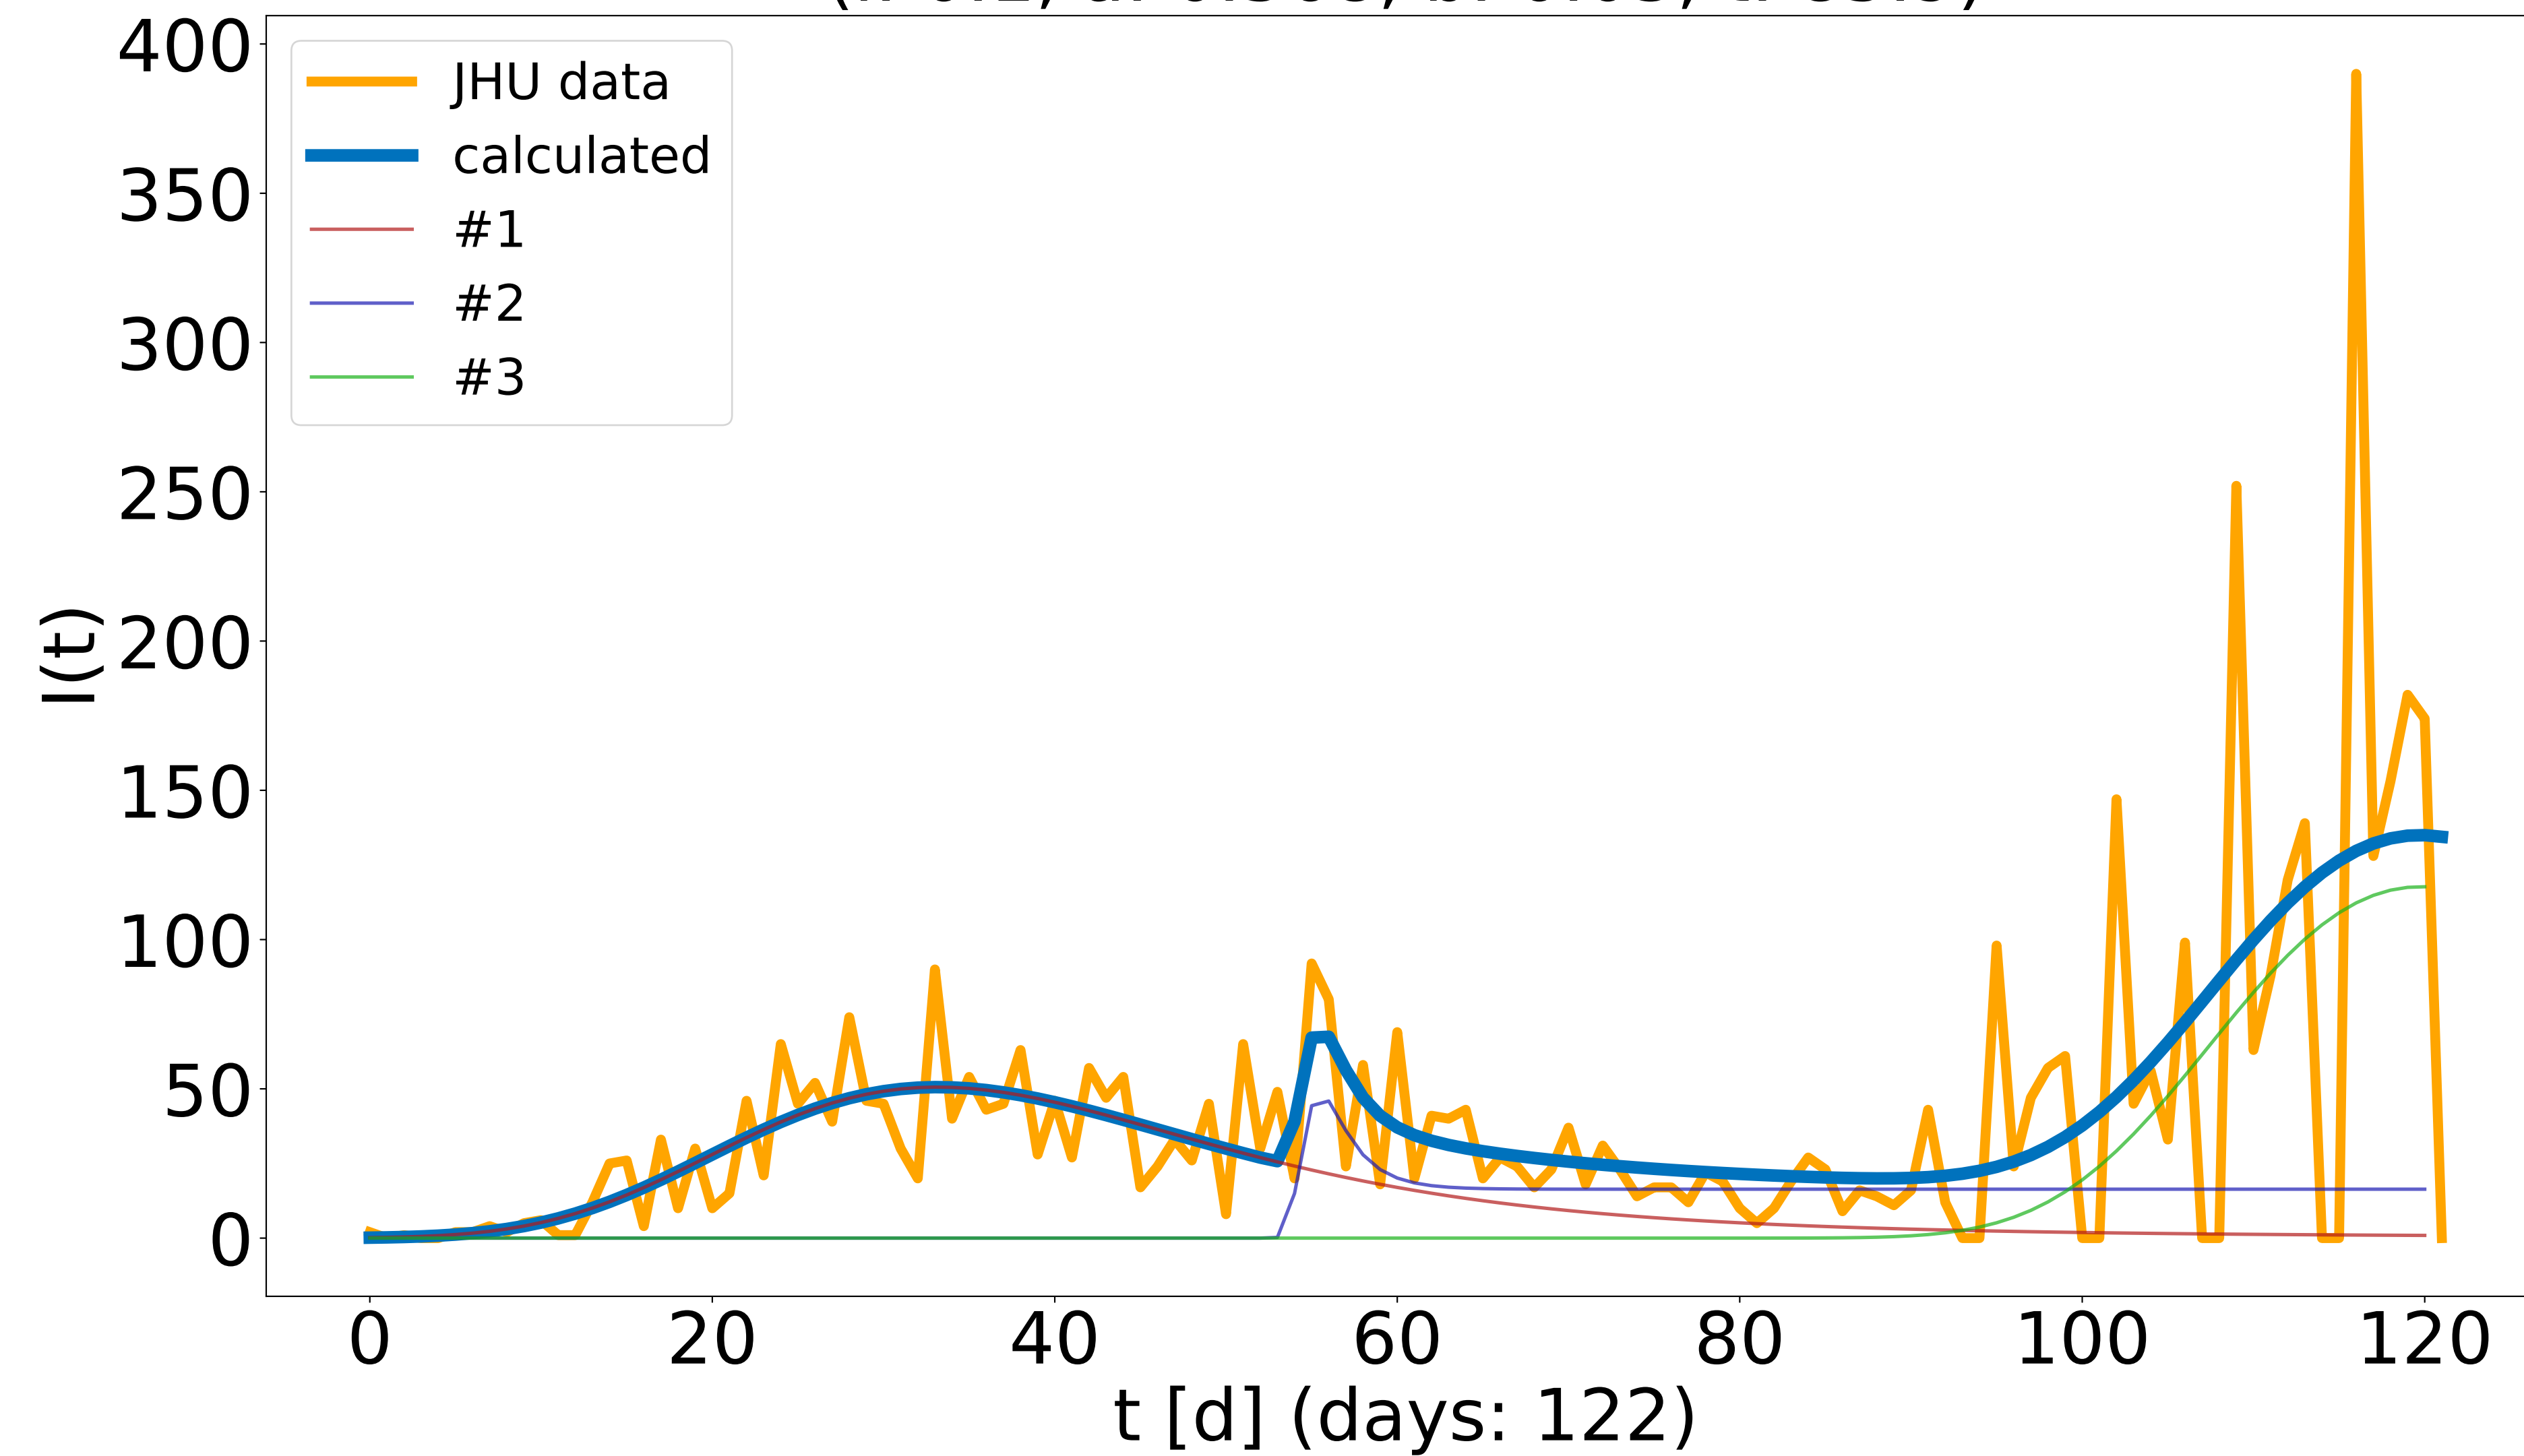

Bosnia and Herzegovina ( $R^2 = 0.973$ )  
(i: 0.2, a: 0.476, b: 0.032, t: 1.0)  
(i: 11.4, a: 0.53, b: 0.186, t: 50.8)  
(i: 0.1, a: 0.365, b: 0.018, t: 75.3)

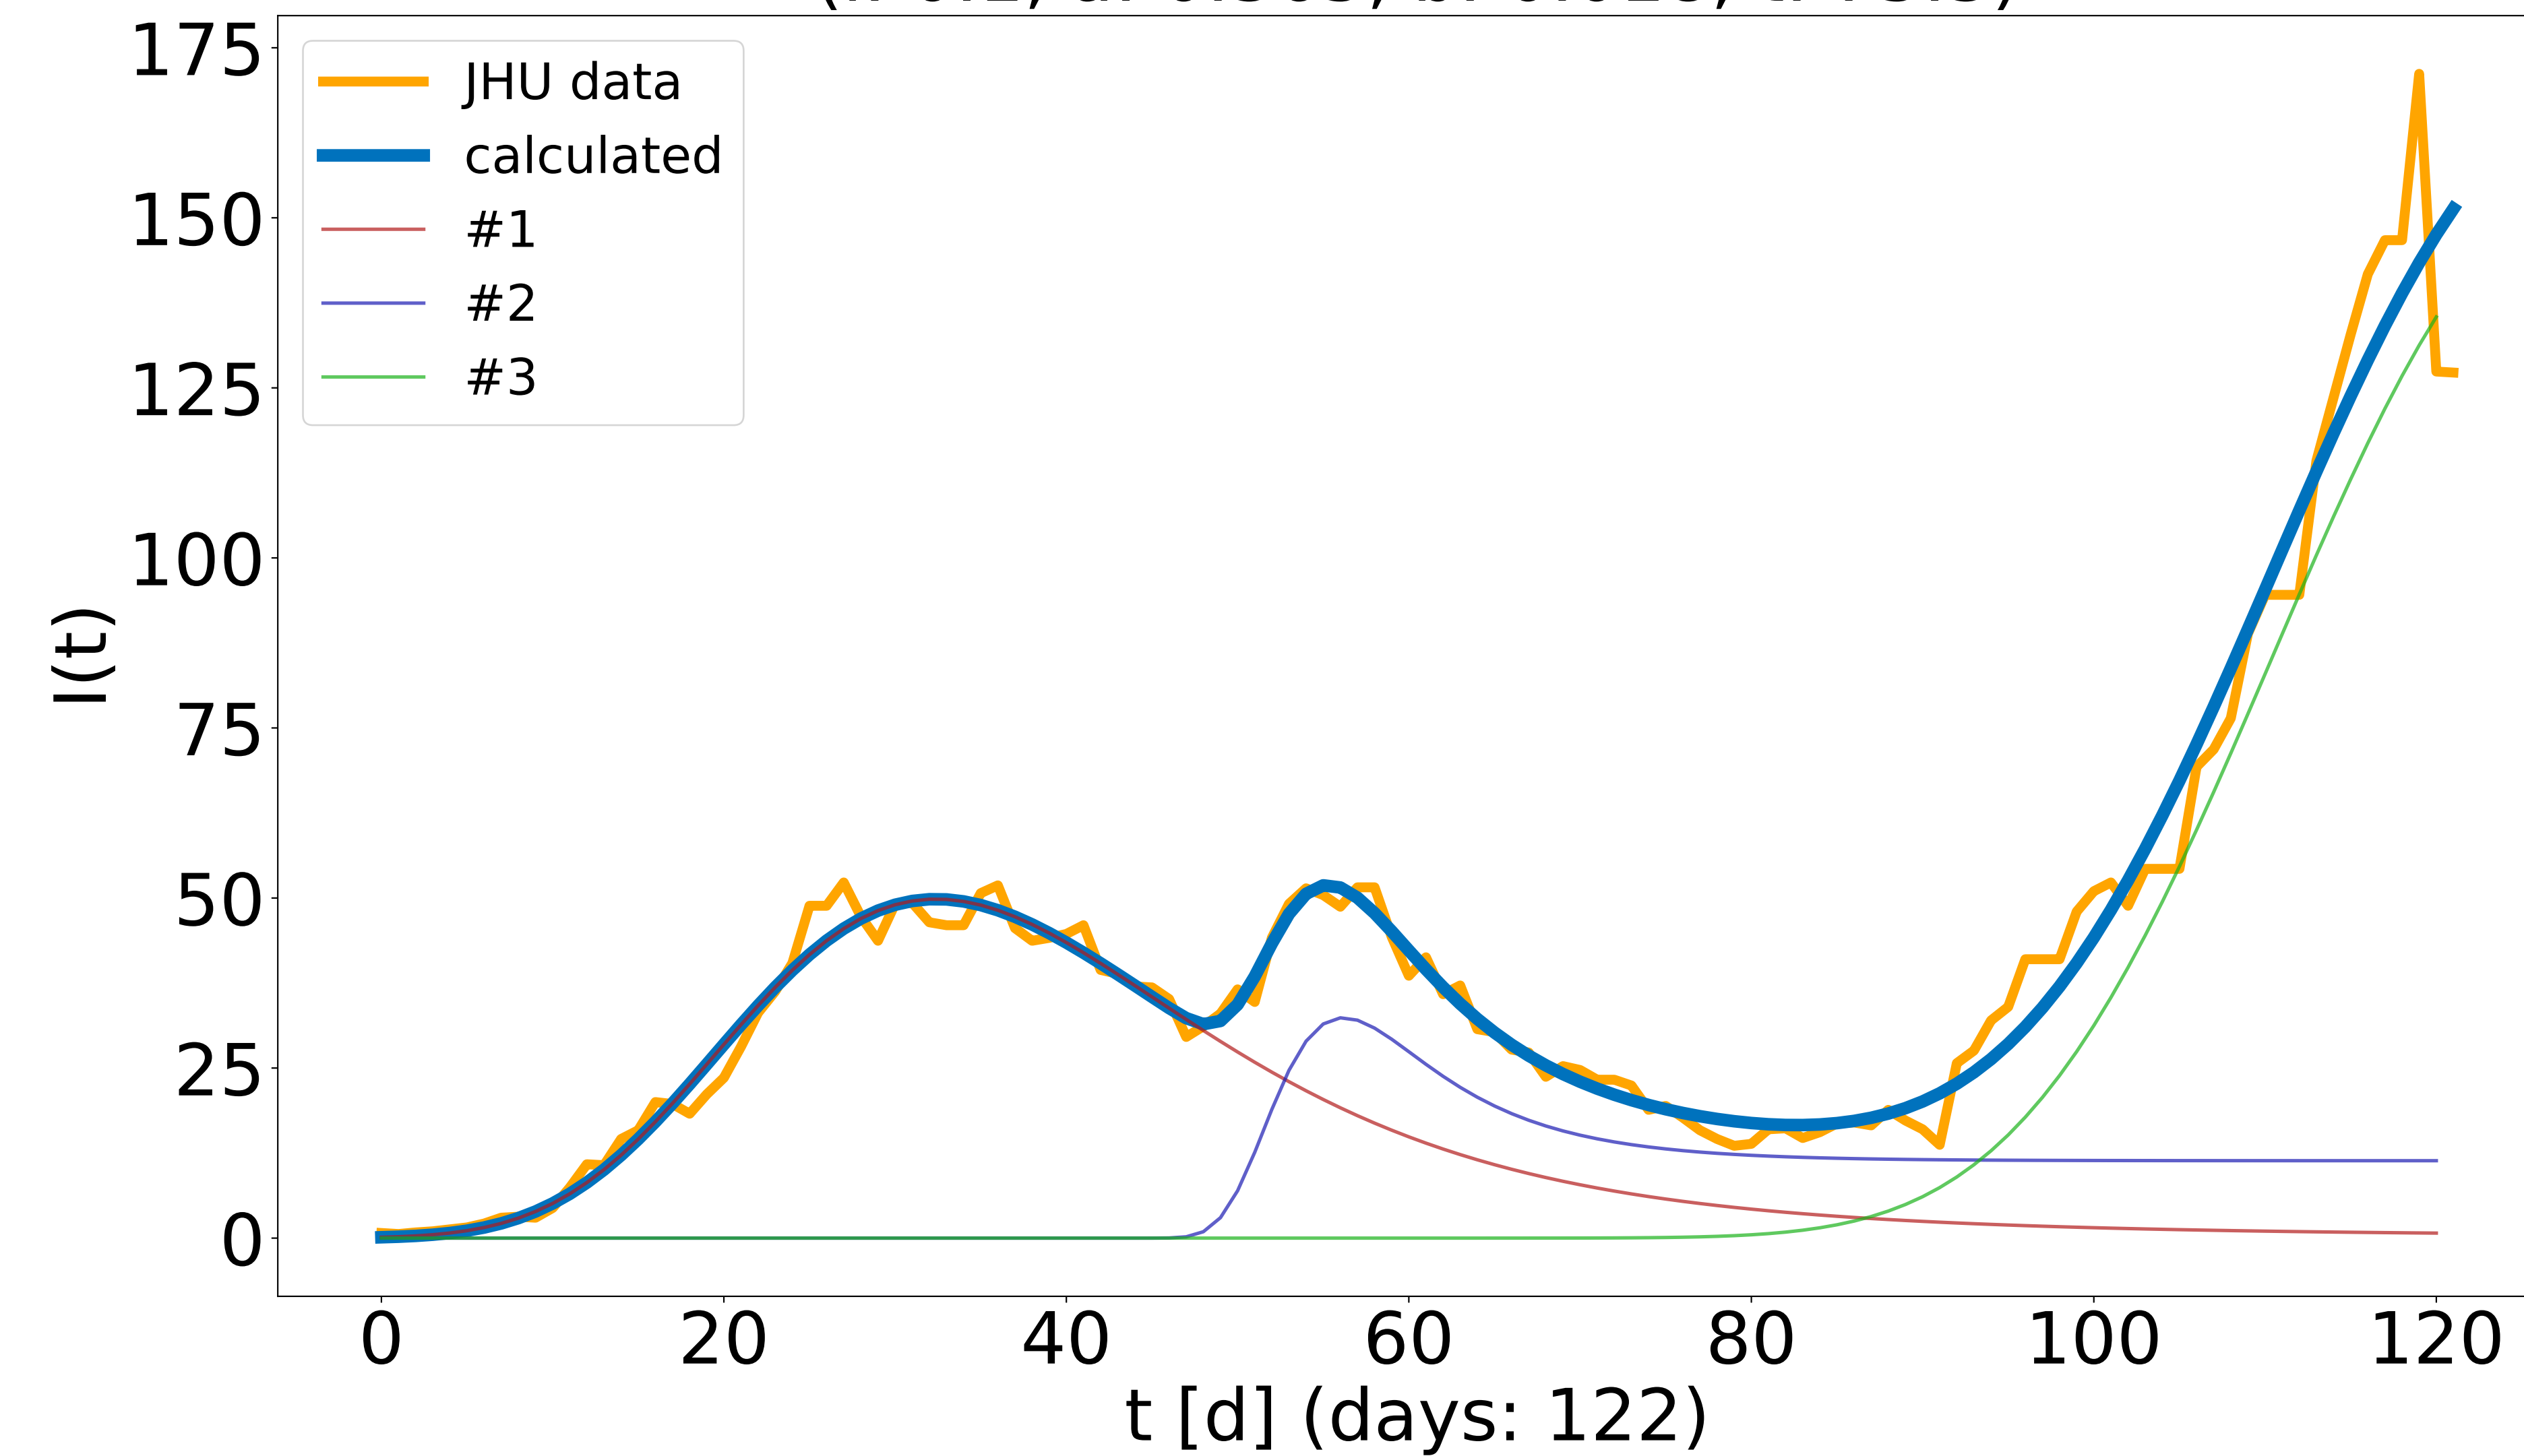

Canada, Alberta ( $R^2 = 0.708$ )  
(i: 17.6, a: 0.228, b: 0.06, t: 10.9)  
(i: 0.1, a: 1.206, b: 0.058, t: 30.7)  
(i: 21.2, a: 1.661, b: 1.4, t: 93.6)

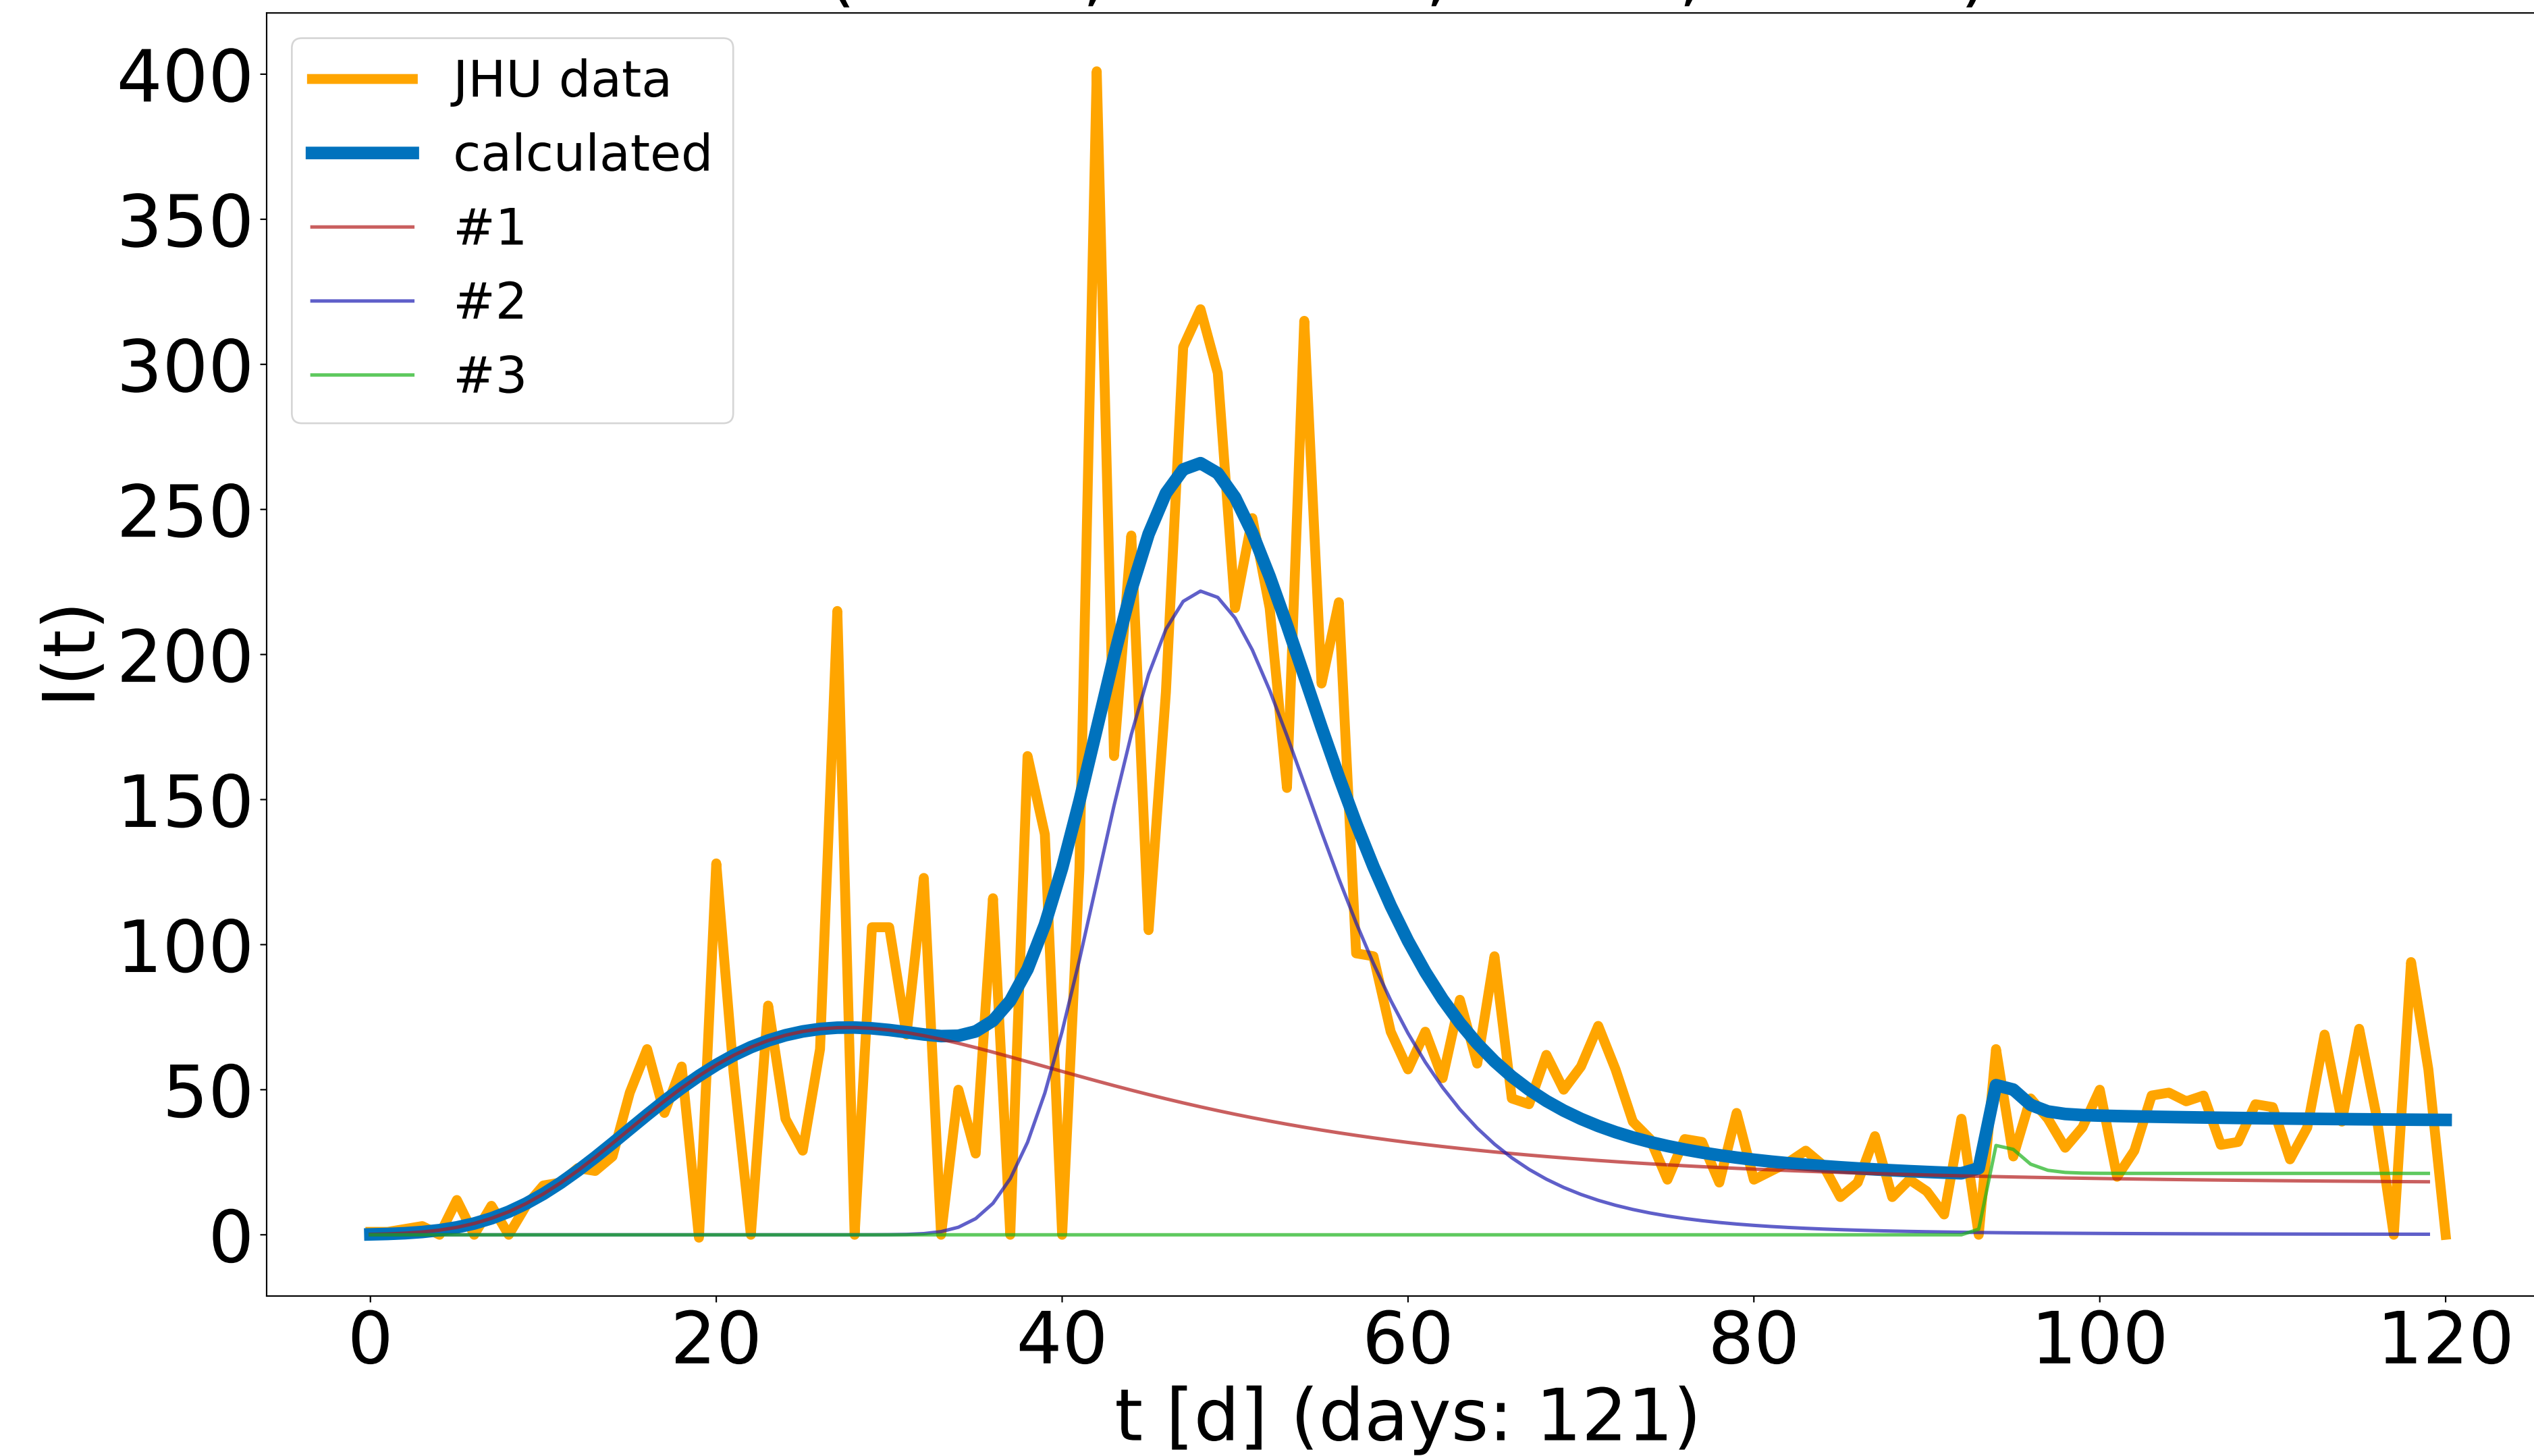

Canada, Alberta ( $R^2 = 0.979$ )  
(i: 15.5, a: 0.215, b: 0.051, t: 9.9)  
(i: 0.1, a: 1.182, b: 0.057, t: 30.6)  
(i: 25.0, a: 0.001, b: 0.2, t: 113.7)

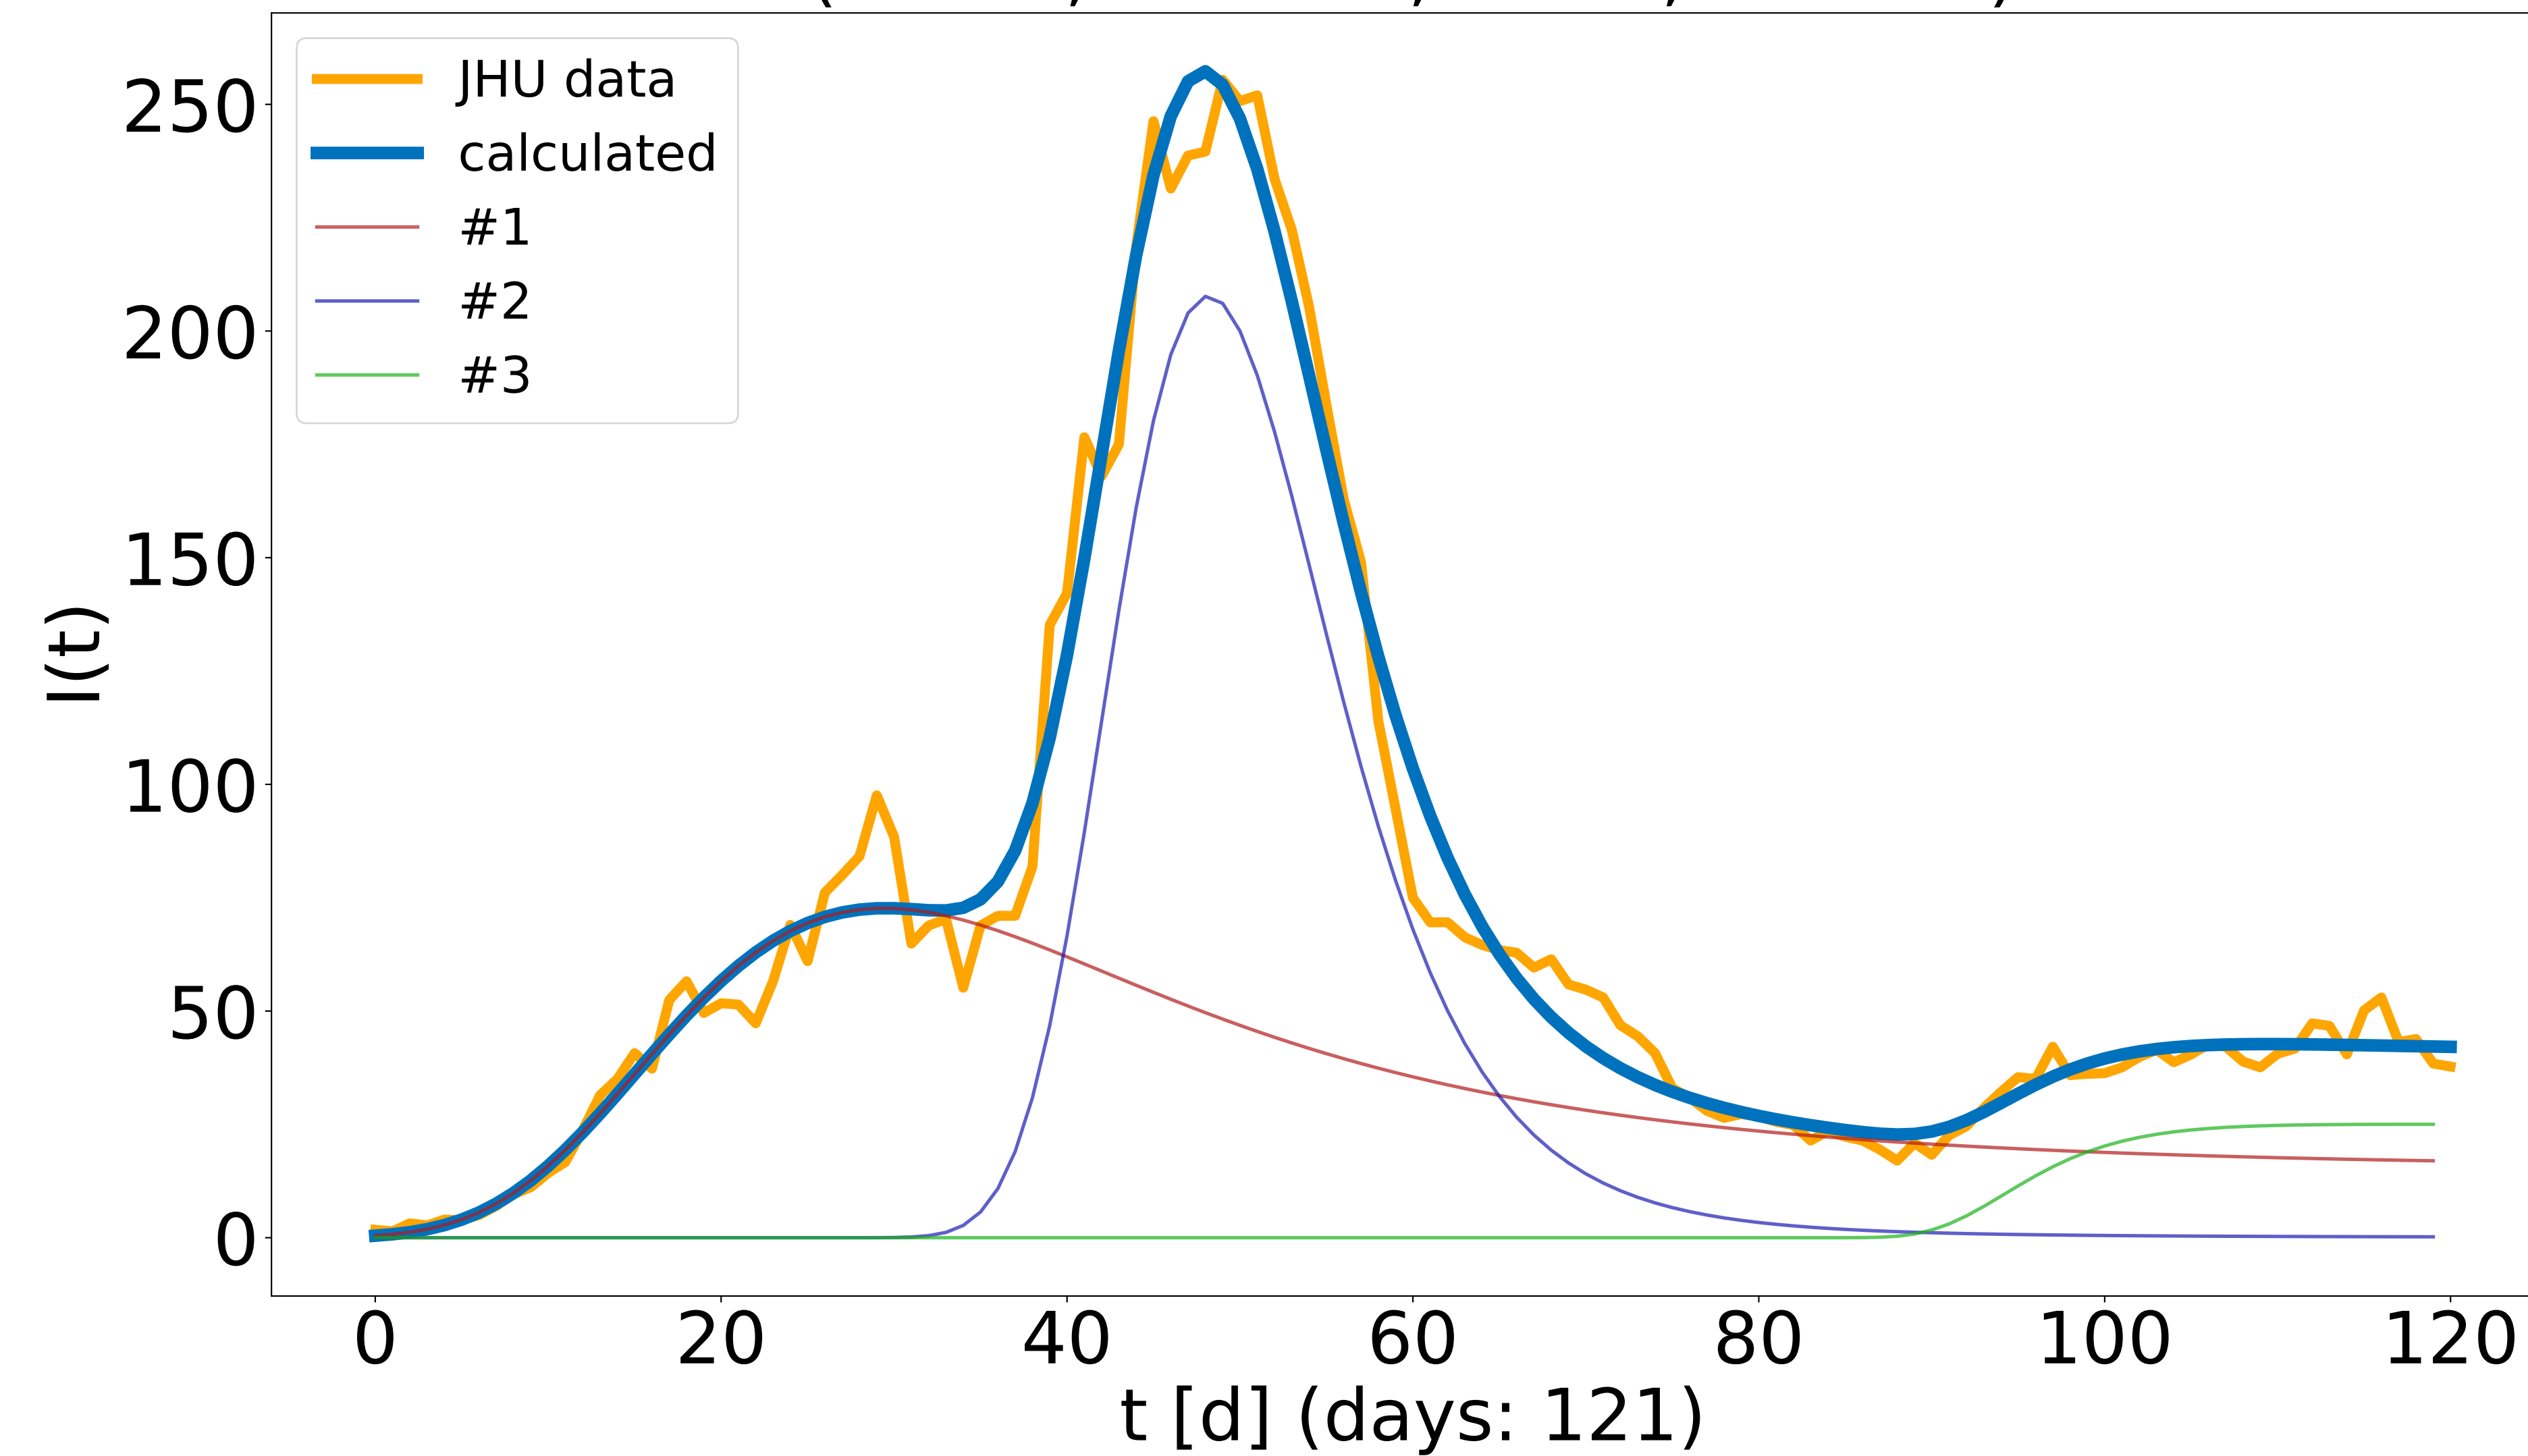



Canada, British Columbia ( $R^2 = 0.425$ )  
(i: 9.5, a: 0.521, b: 0.095, t: 45.5)  
(i: 0.3, a: 1.161, b: 0.09, t: 75.9)  
(i: 1.8, a: 1.98, b: 1.046, t: 131.4)

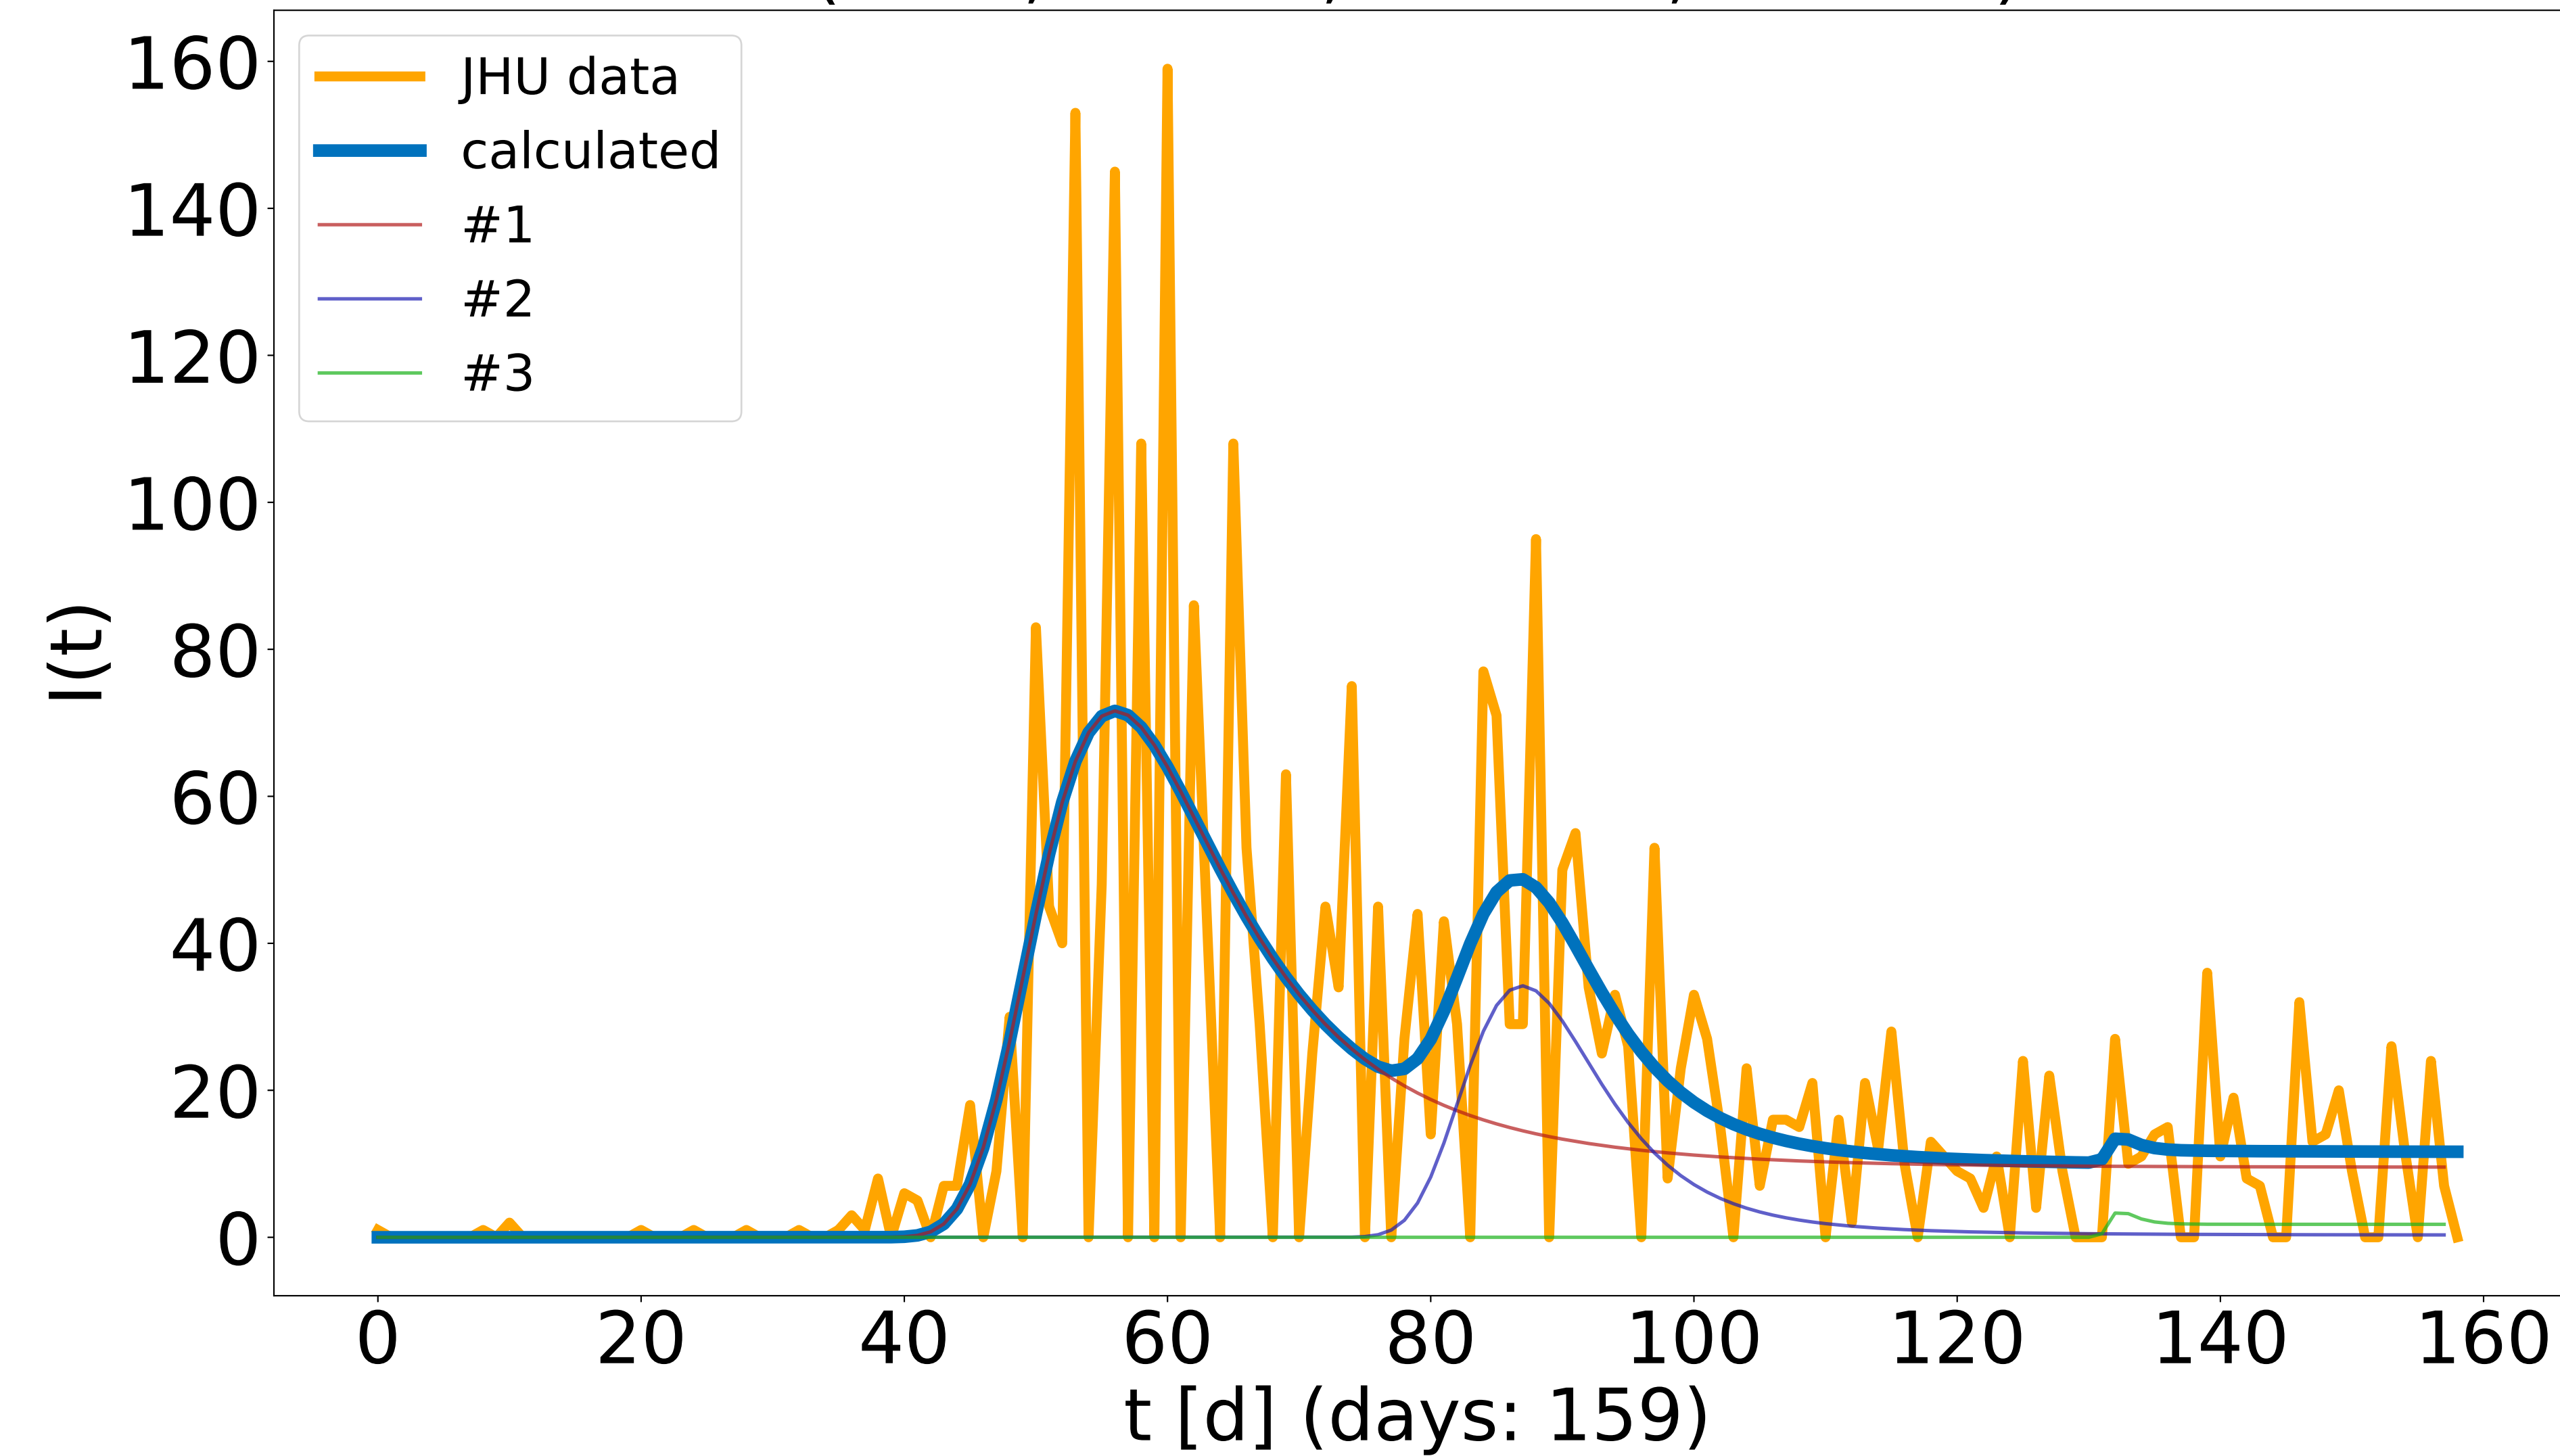

Canada, British Columbia ( $R^2 = 0.978$ )  
(i: 9.6, a: 0.476, b: 0.089, t: 45.0)  
(i: 0.1, a: 1.111, b: 0.072, t: 73.2)  
(i: 0.3, a: 0.865, b: 0.139, t: 132.1)

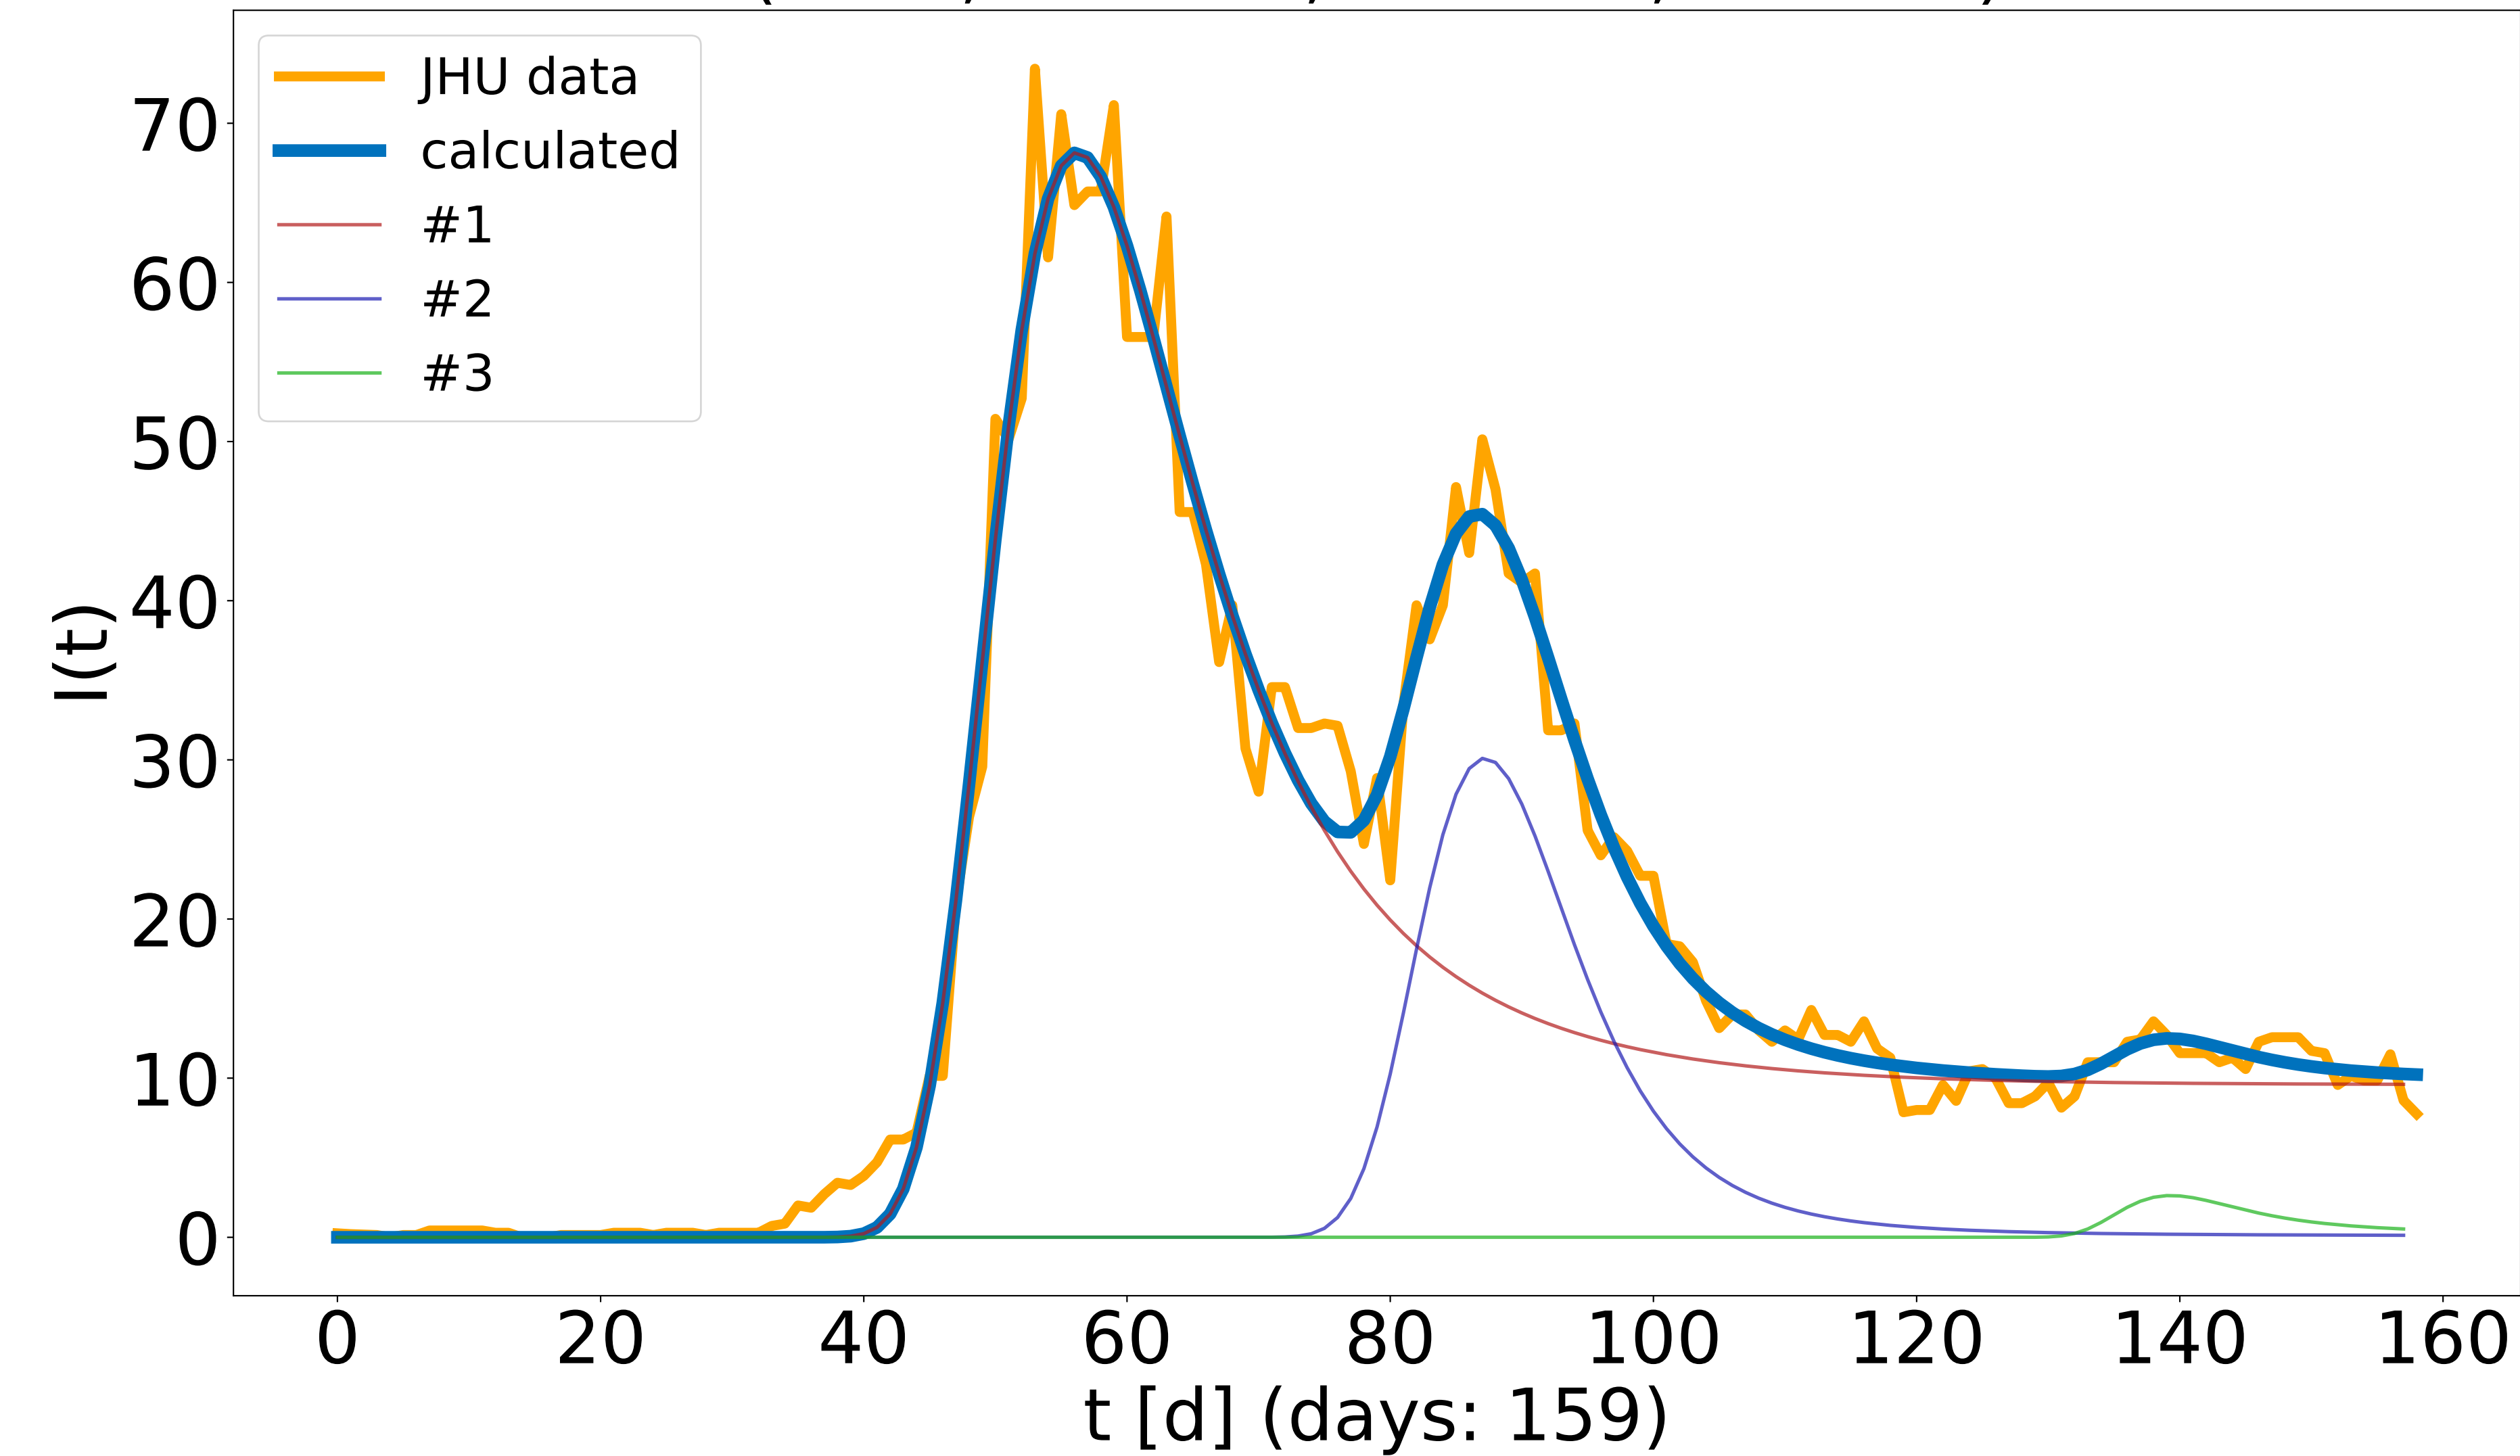

Canada, Quebec ( $R^2 = 0.769$ )  
(i: 0.1, a: 0.899, b: 0.037, t: 9.7)  
(i: 0.1, a: 0.508, b: 0.02, t: 17.6)  
(i: 64.7, a: 1.996, b: 1.39, t: 121.4)

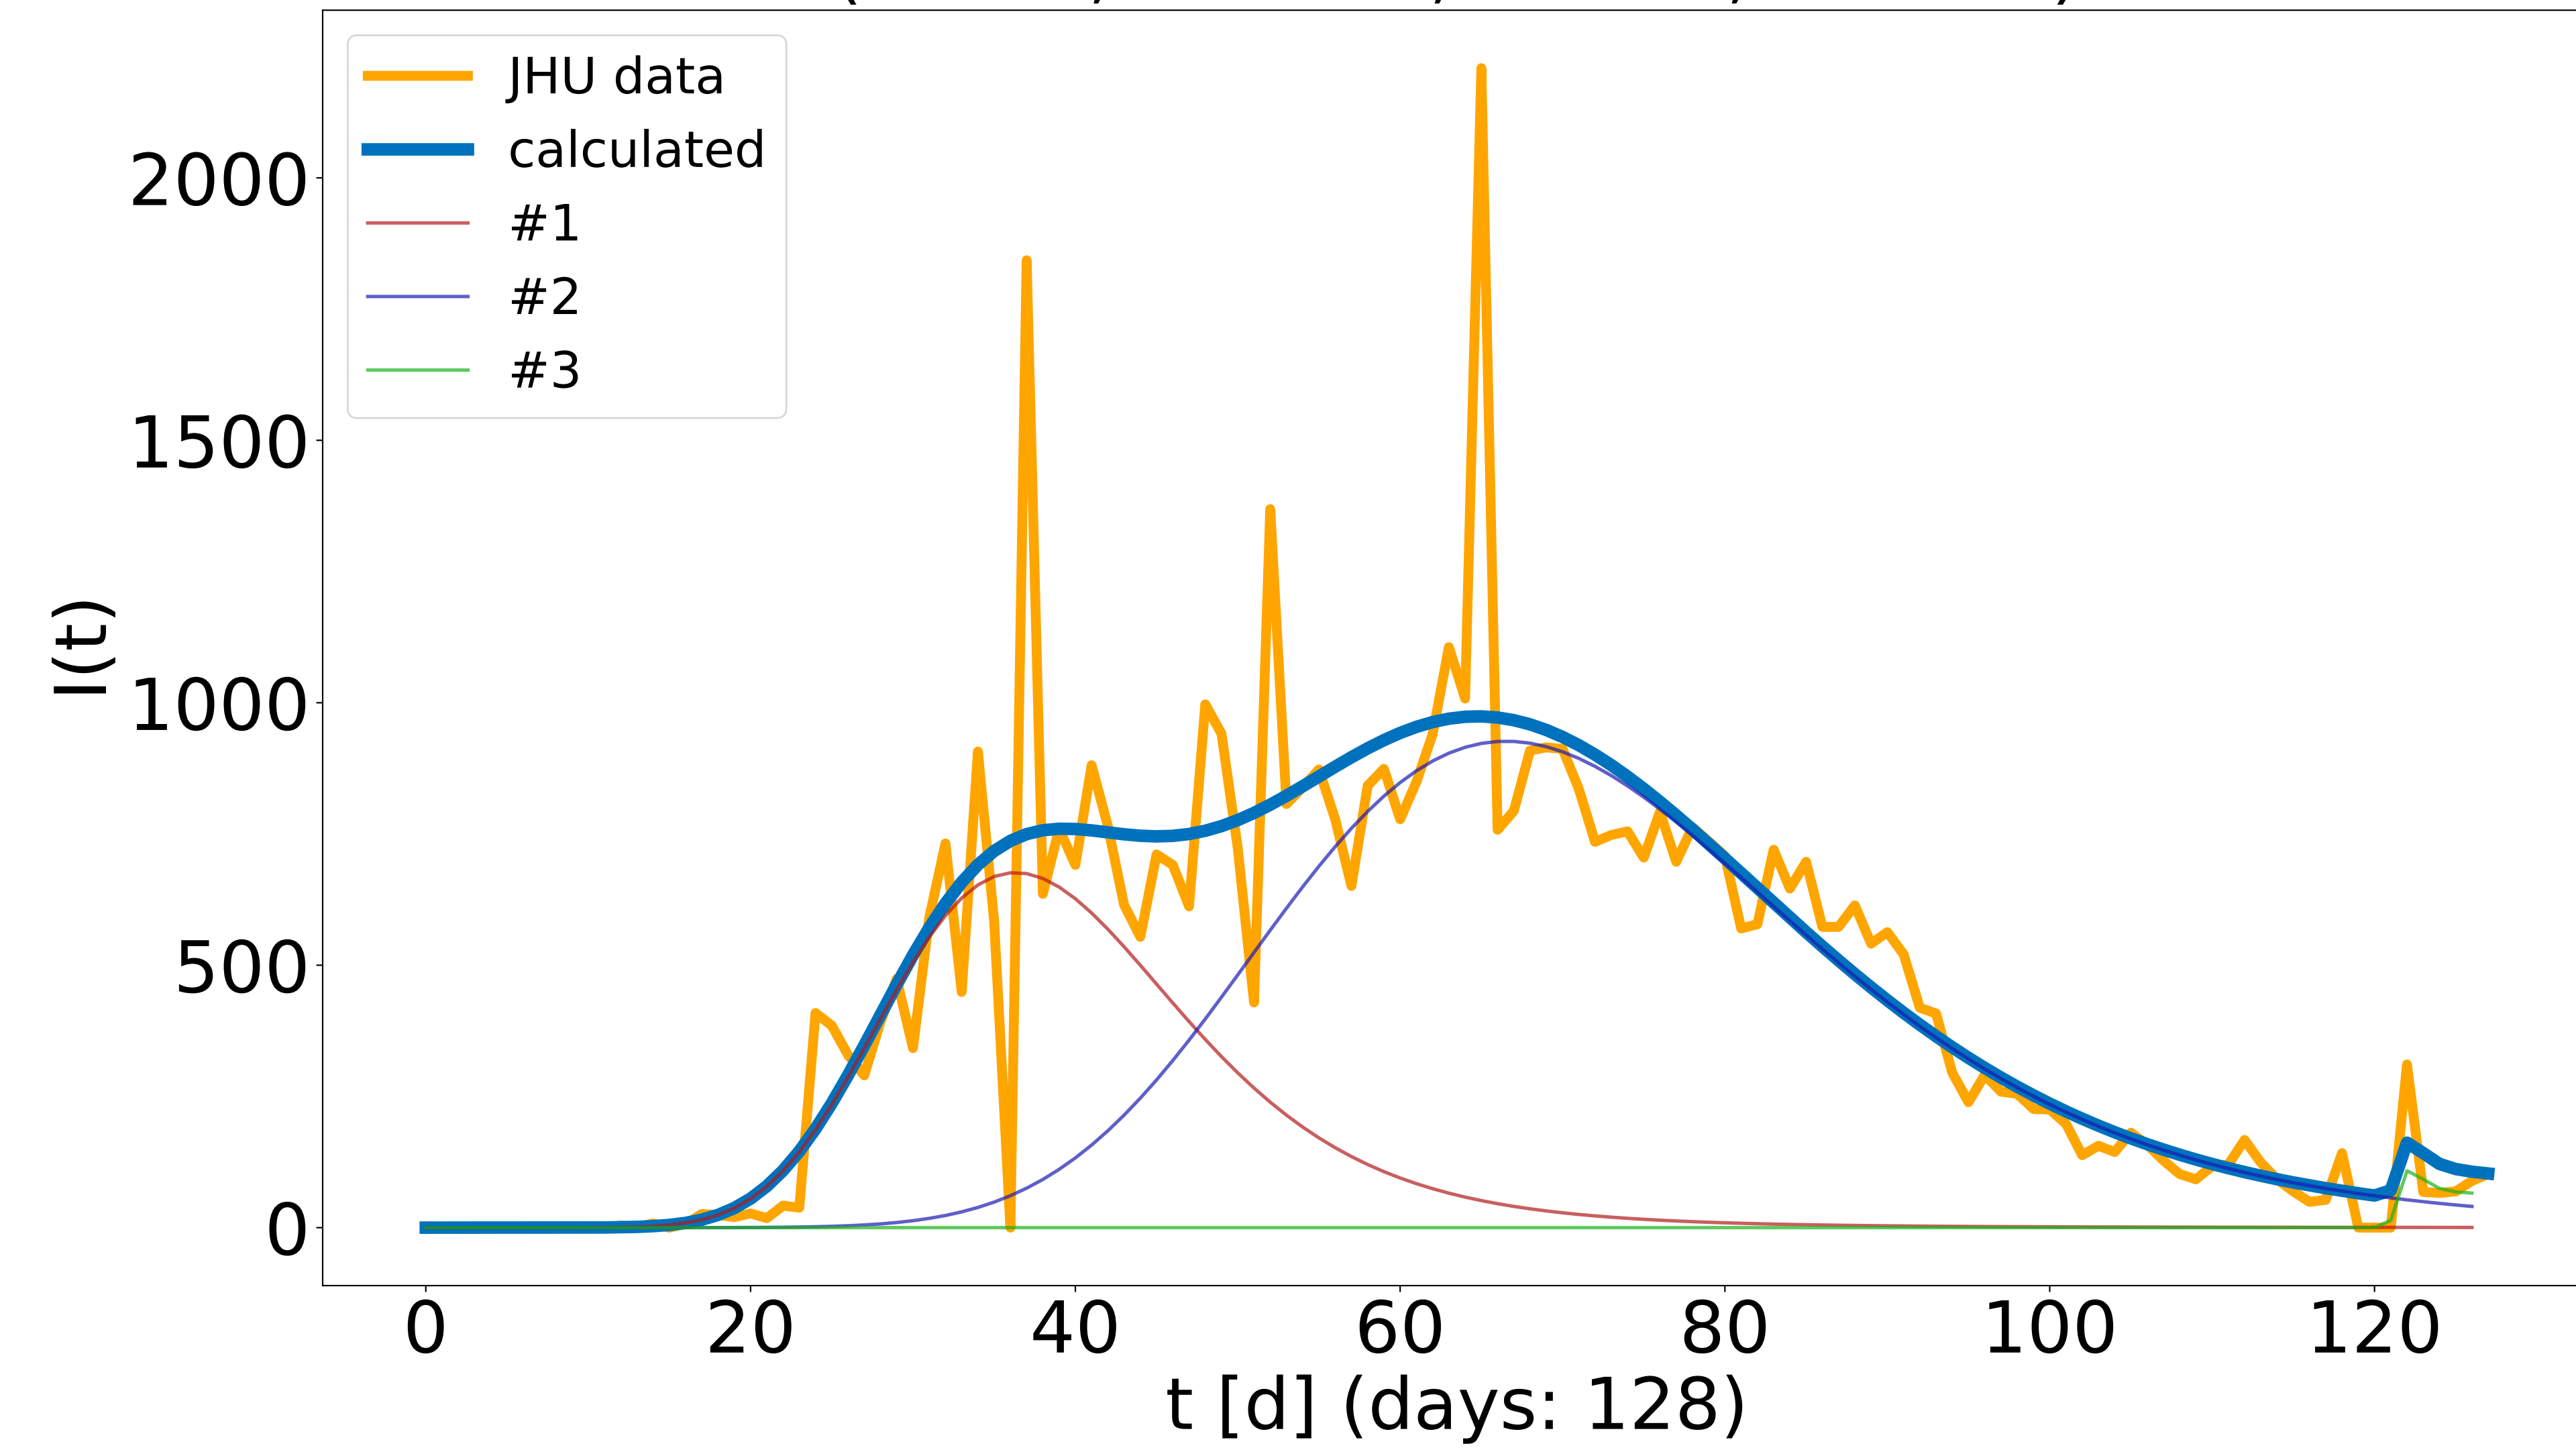

Canada, Quebec ( $R^2 = 0.984$ )  
(i: 53.0, a: 0.33, b: 0.045, t: 18.7)  
(i: 0.1, a: 0.815, b: 0.034, t: 36.9)  
(i: 0.1, a: 1.206, b: 0.056, t: 68.2)

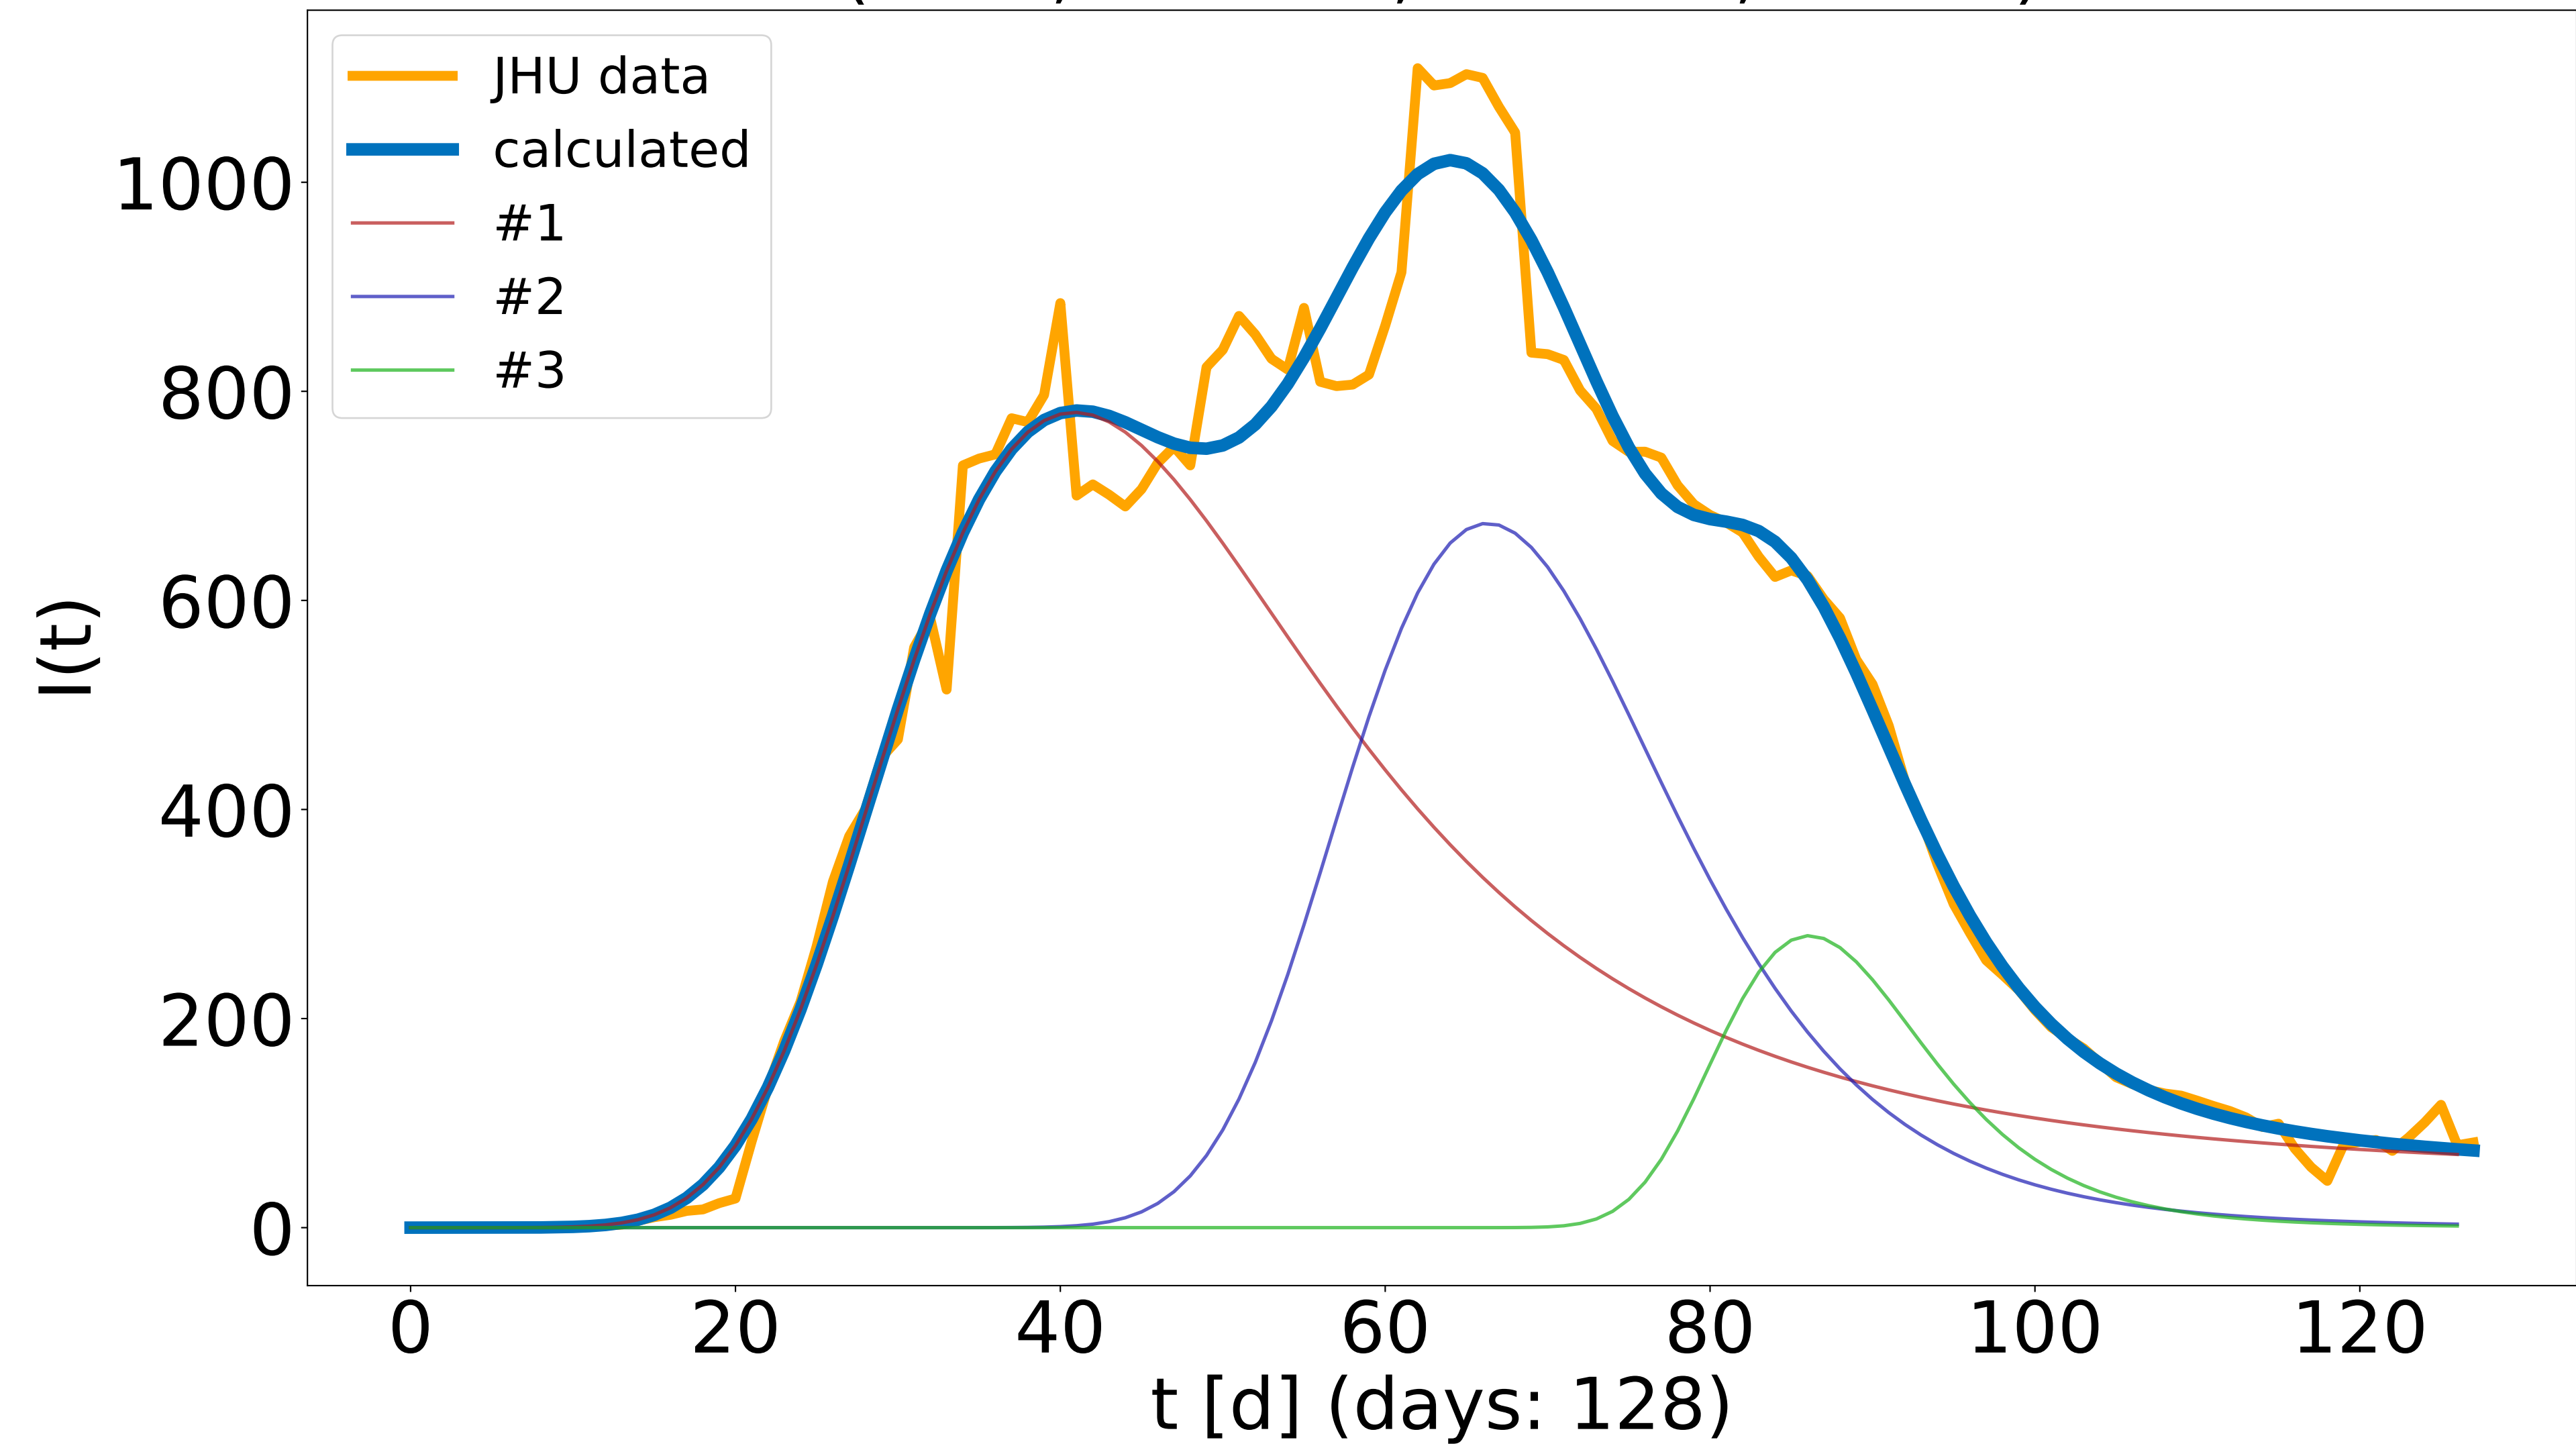

Chad ( $R^2 = 0.512$ )  
(i: 0.2, a: 2.0, b: 0.169, t: 37.8)  
(i: 2.1, a: 2.0, b: 0.271, t: 45.4)  
(i: 0.1, a: 1.077, b: 0.072, t: 47.4)

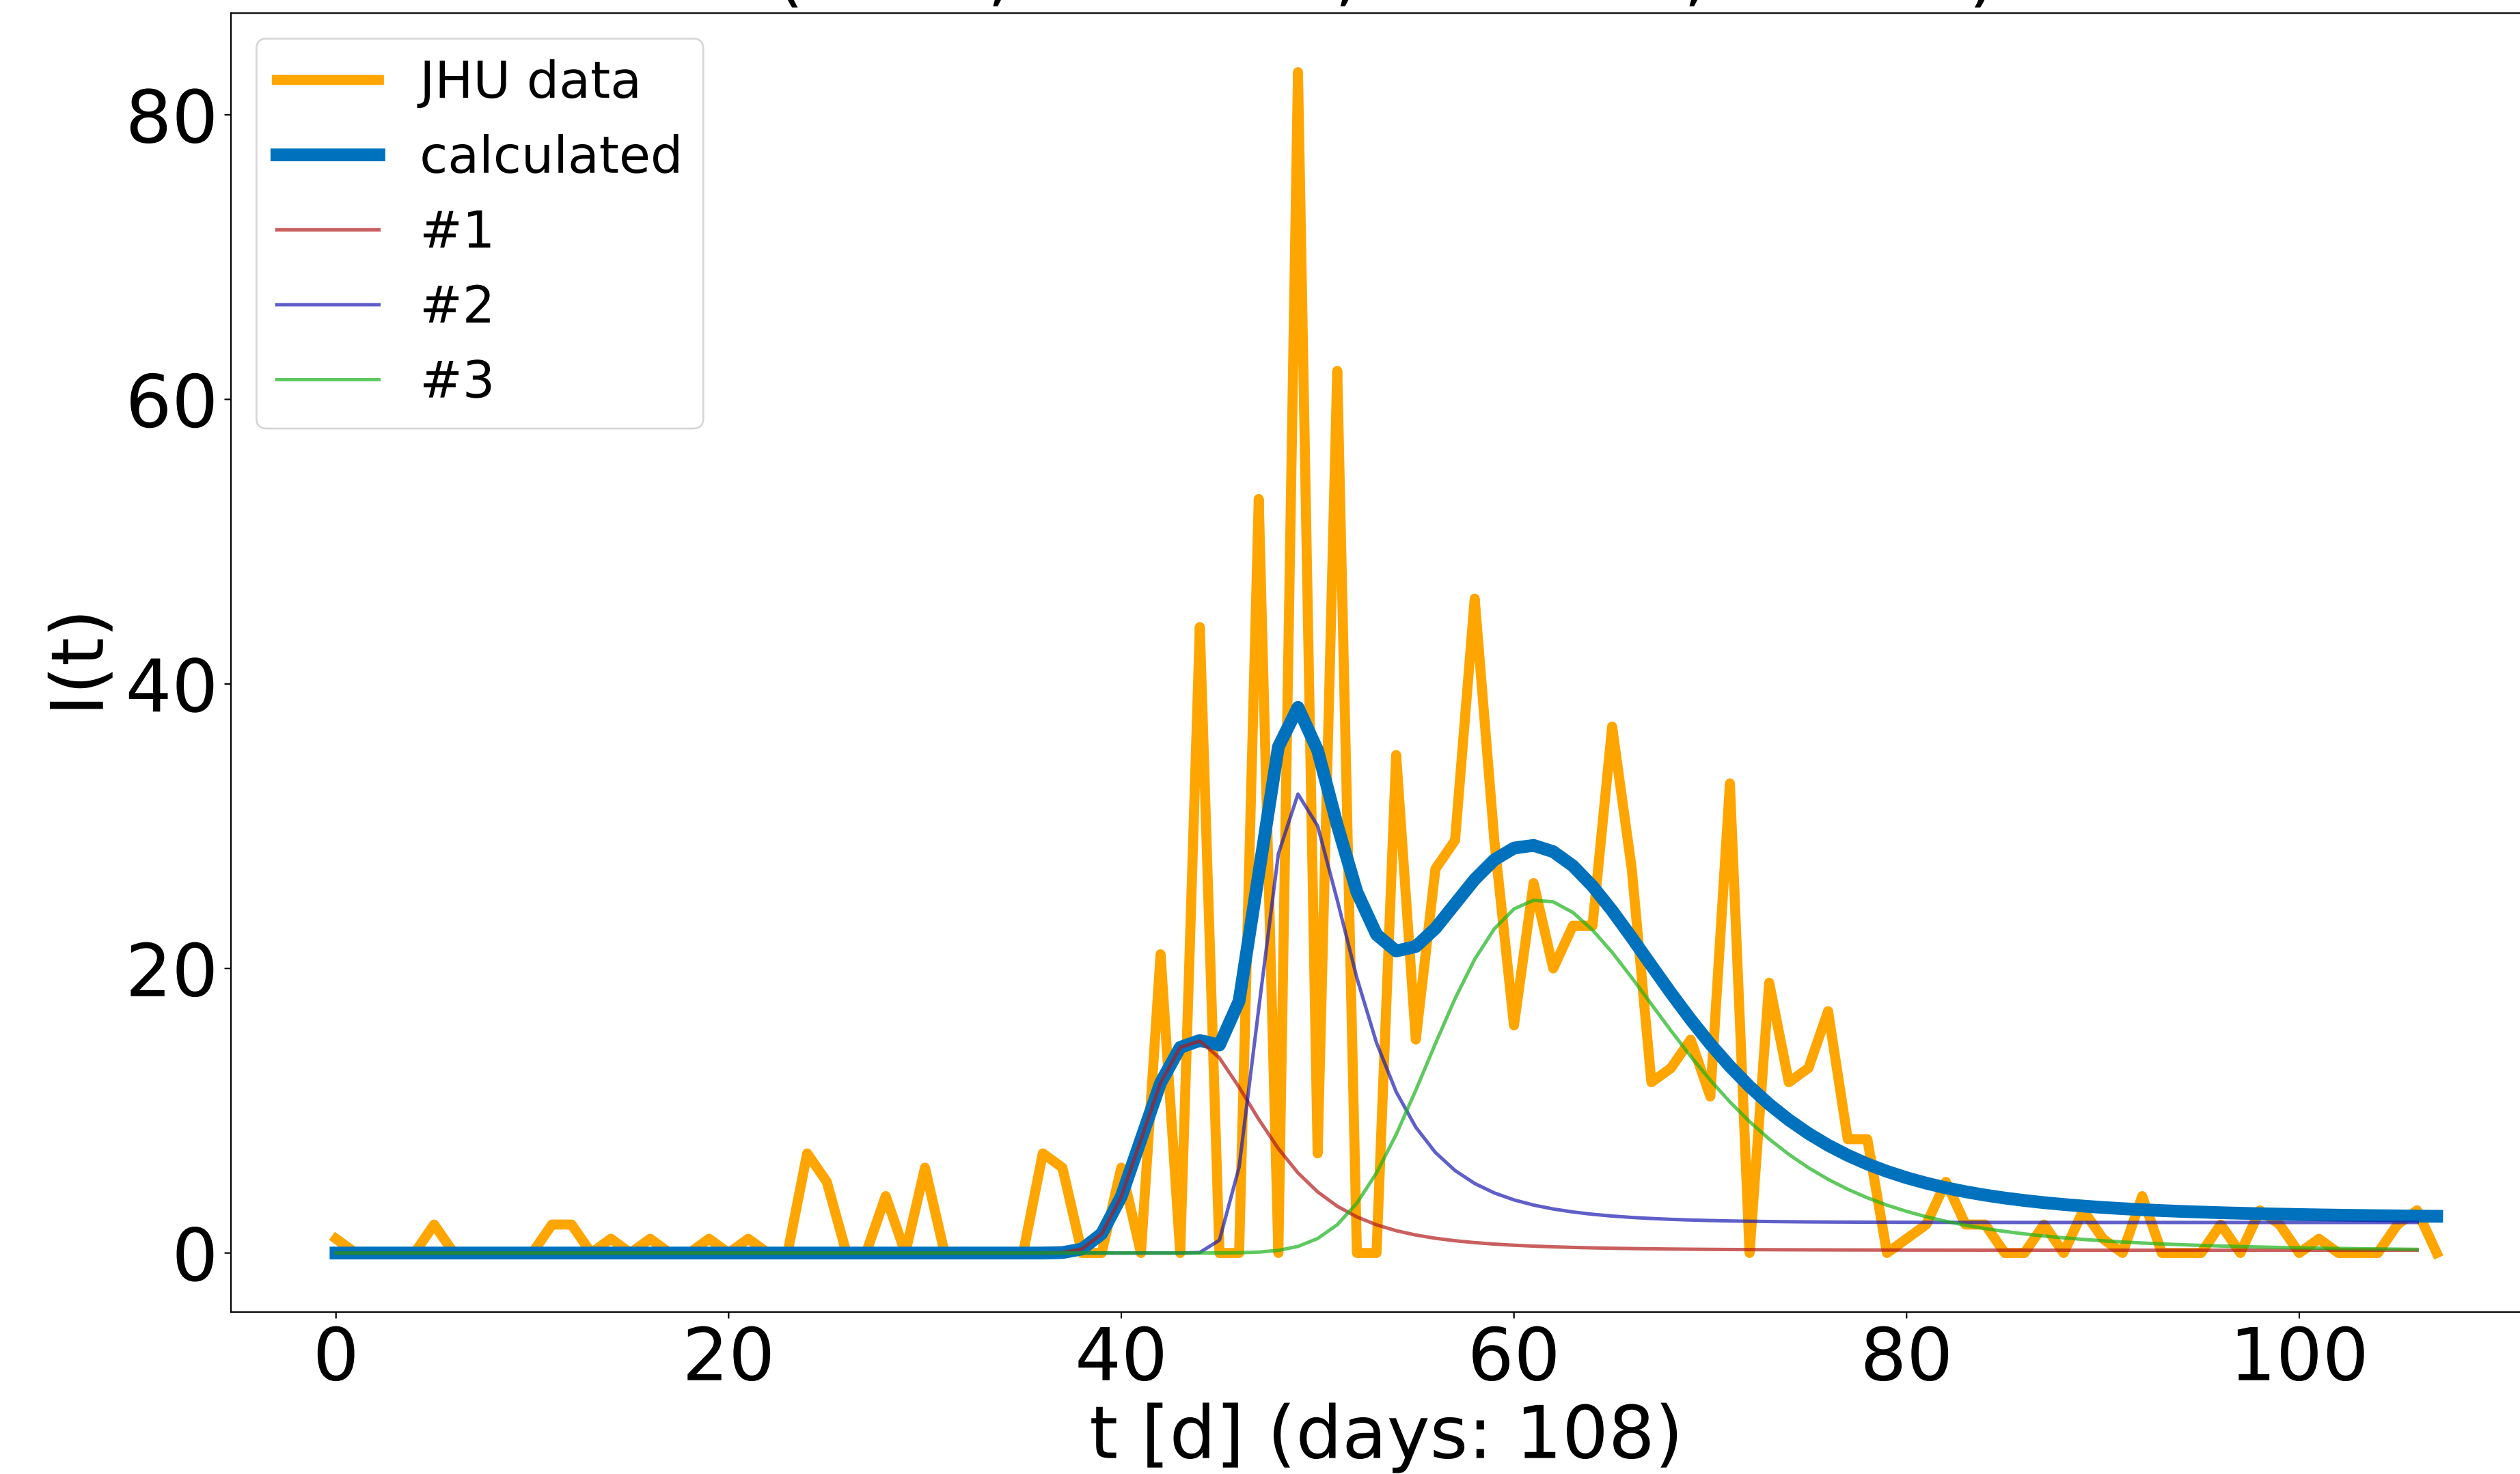

Chad ( $R^2 = 0.981$ )  
(i: 0.1, a: 0.355, b: 0.042, t: 9.2)  
(i: 0.1, a: 1.23, b: 0.081, t: 36.5)  
(i: 0.1, a: 0.906, b: 0.063, t: 47.2)

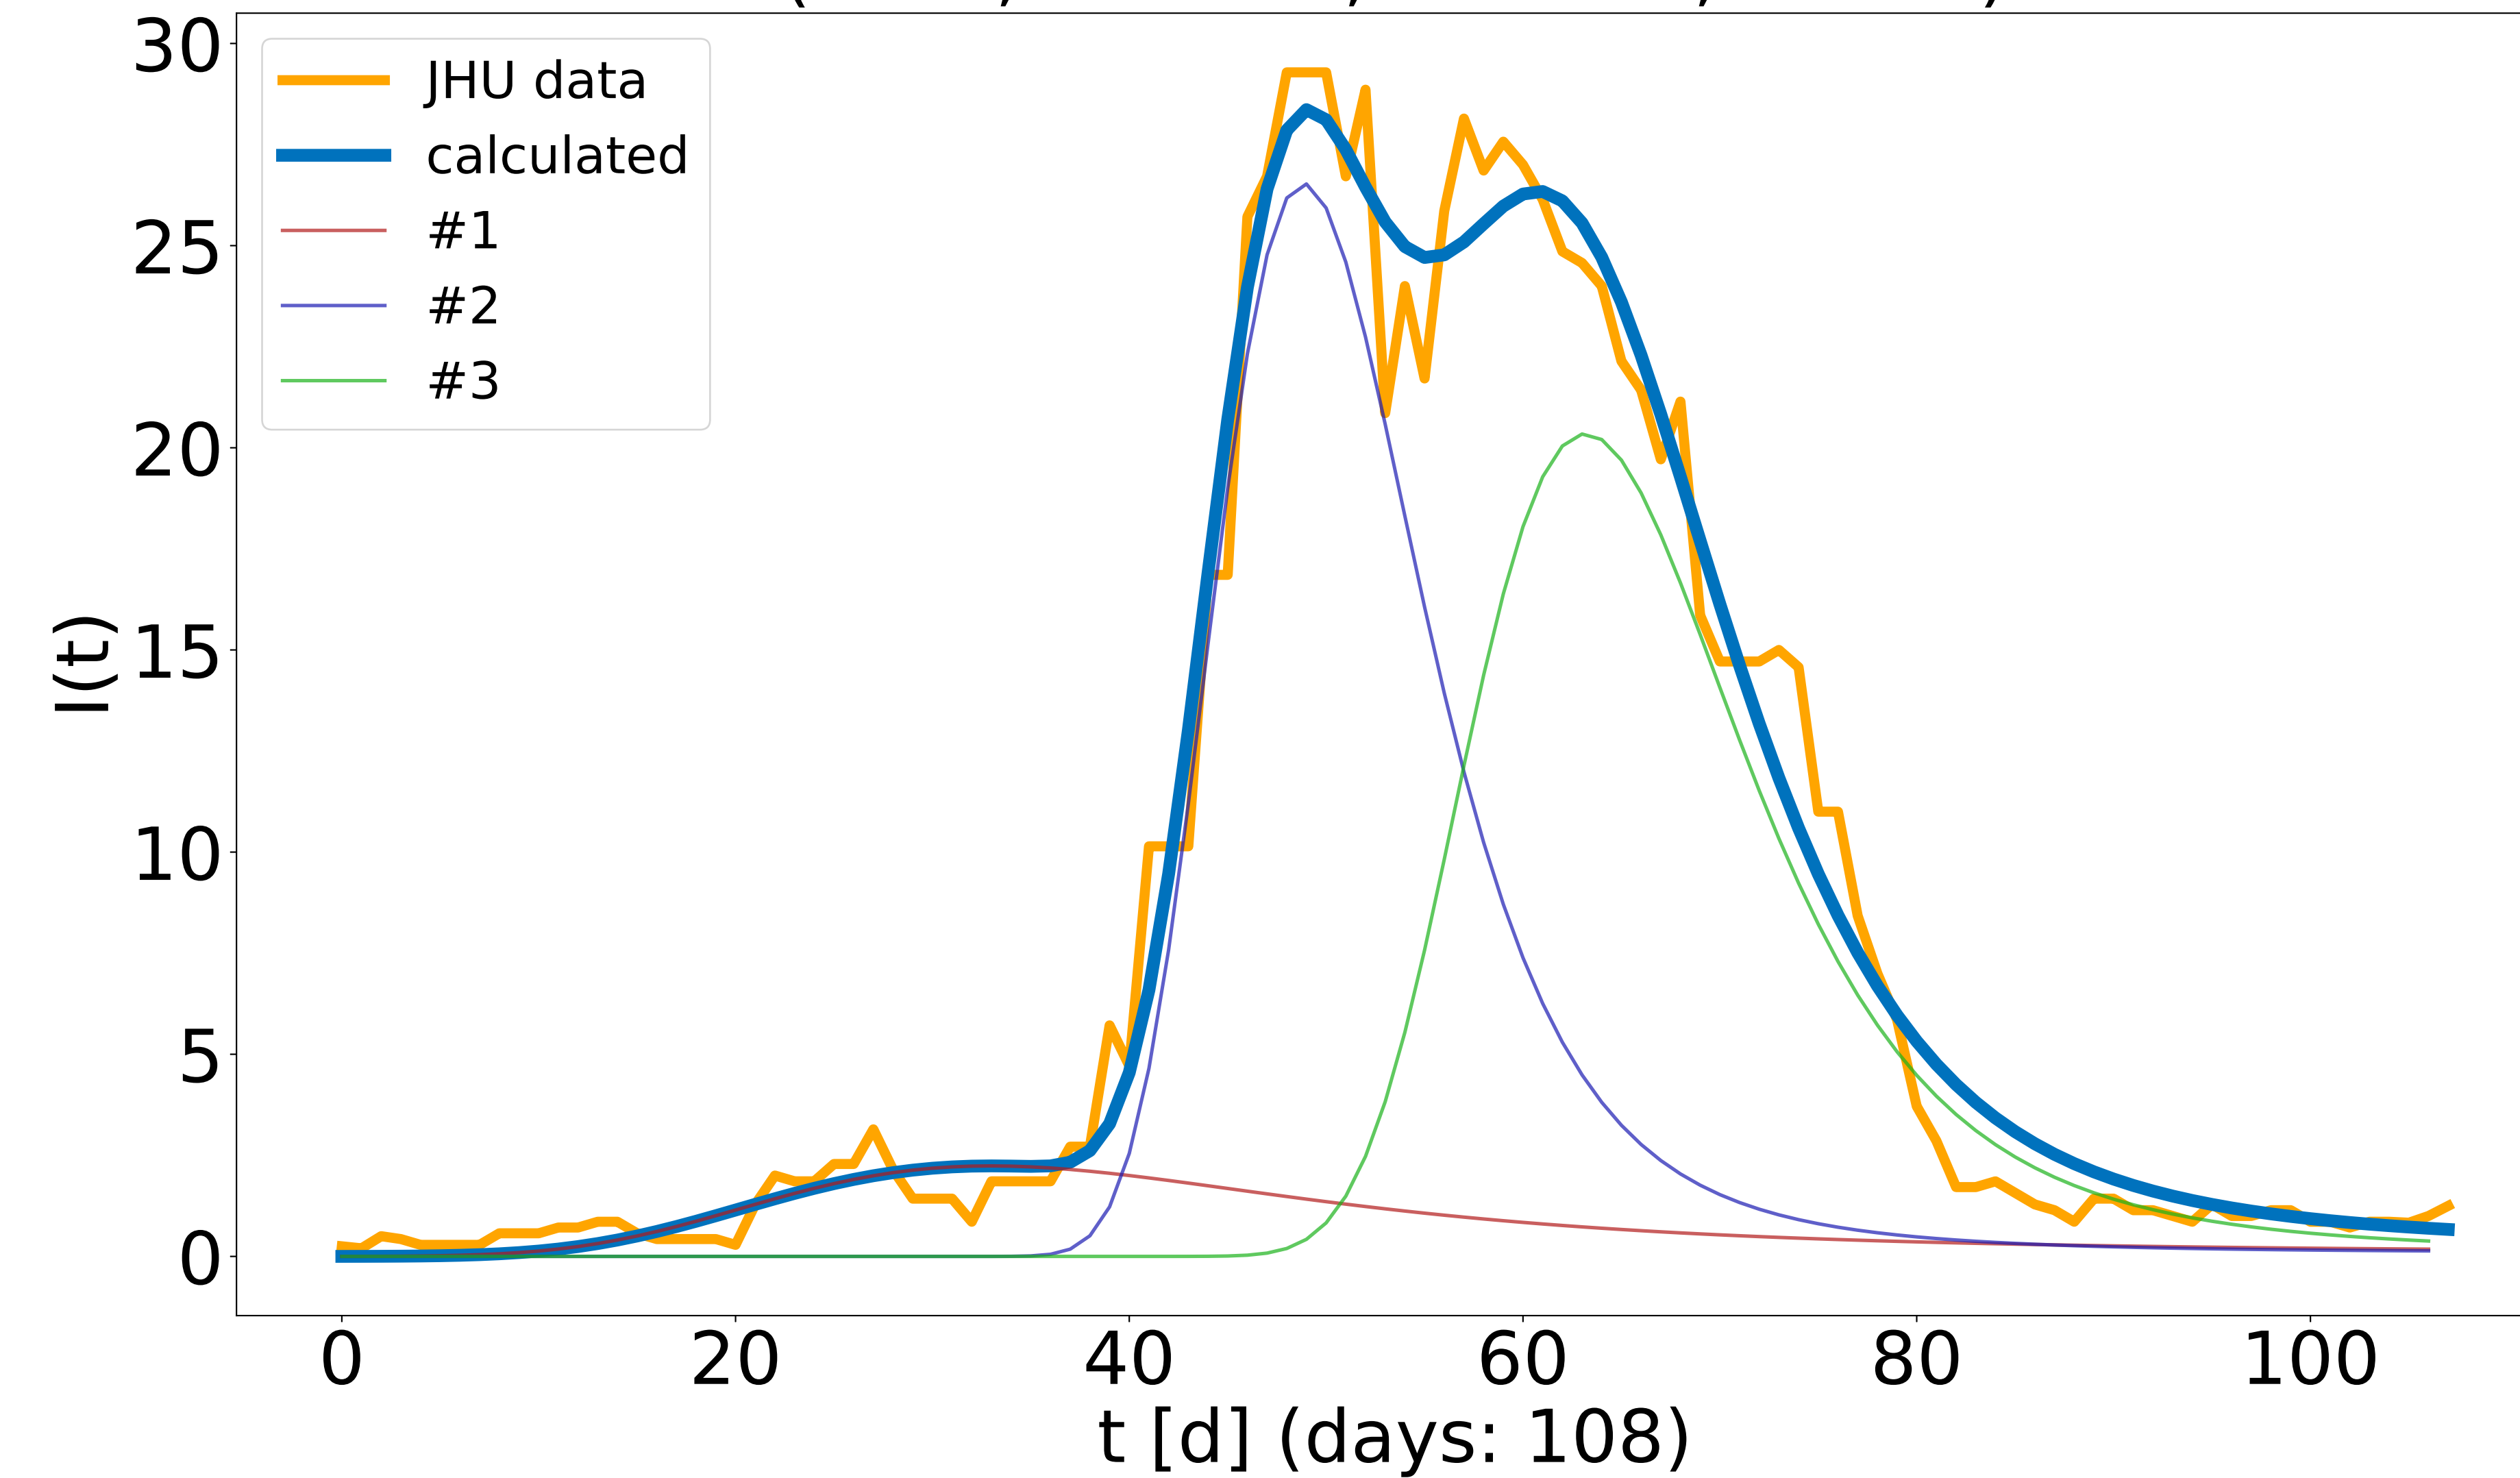



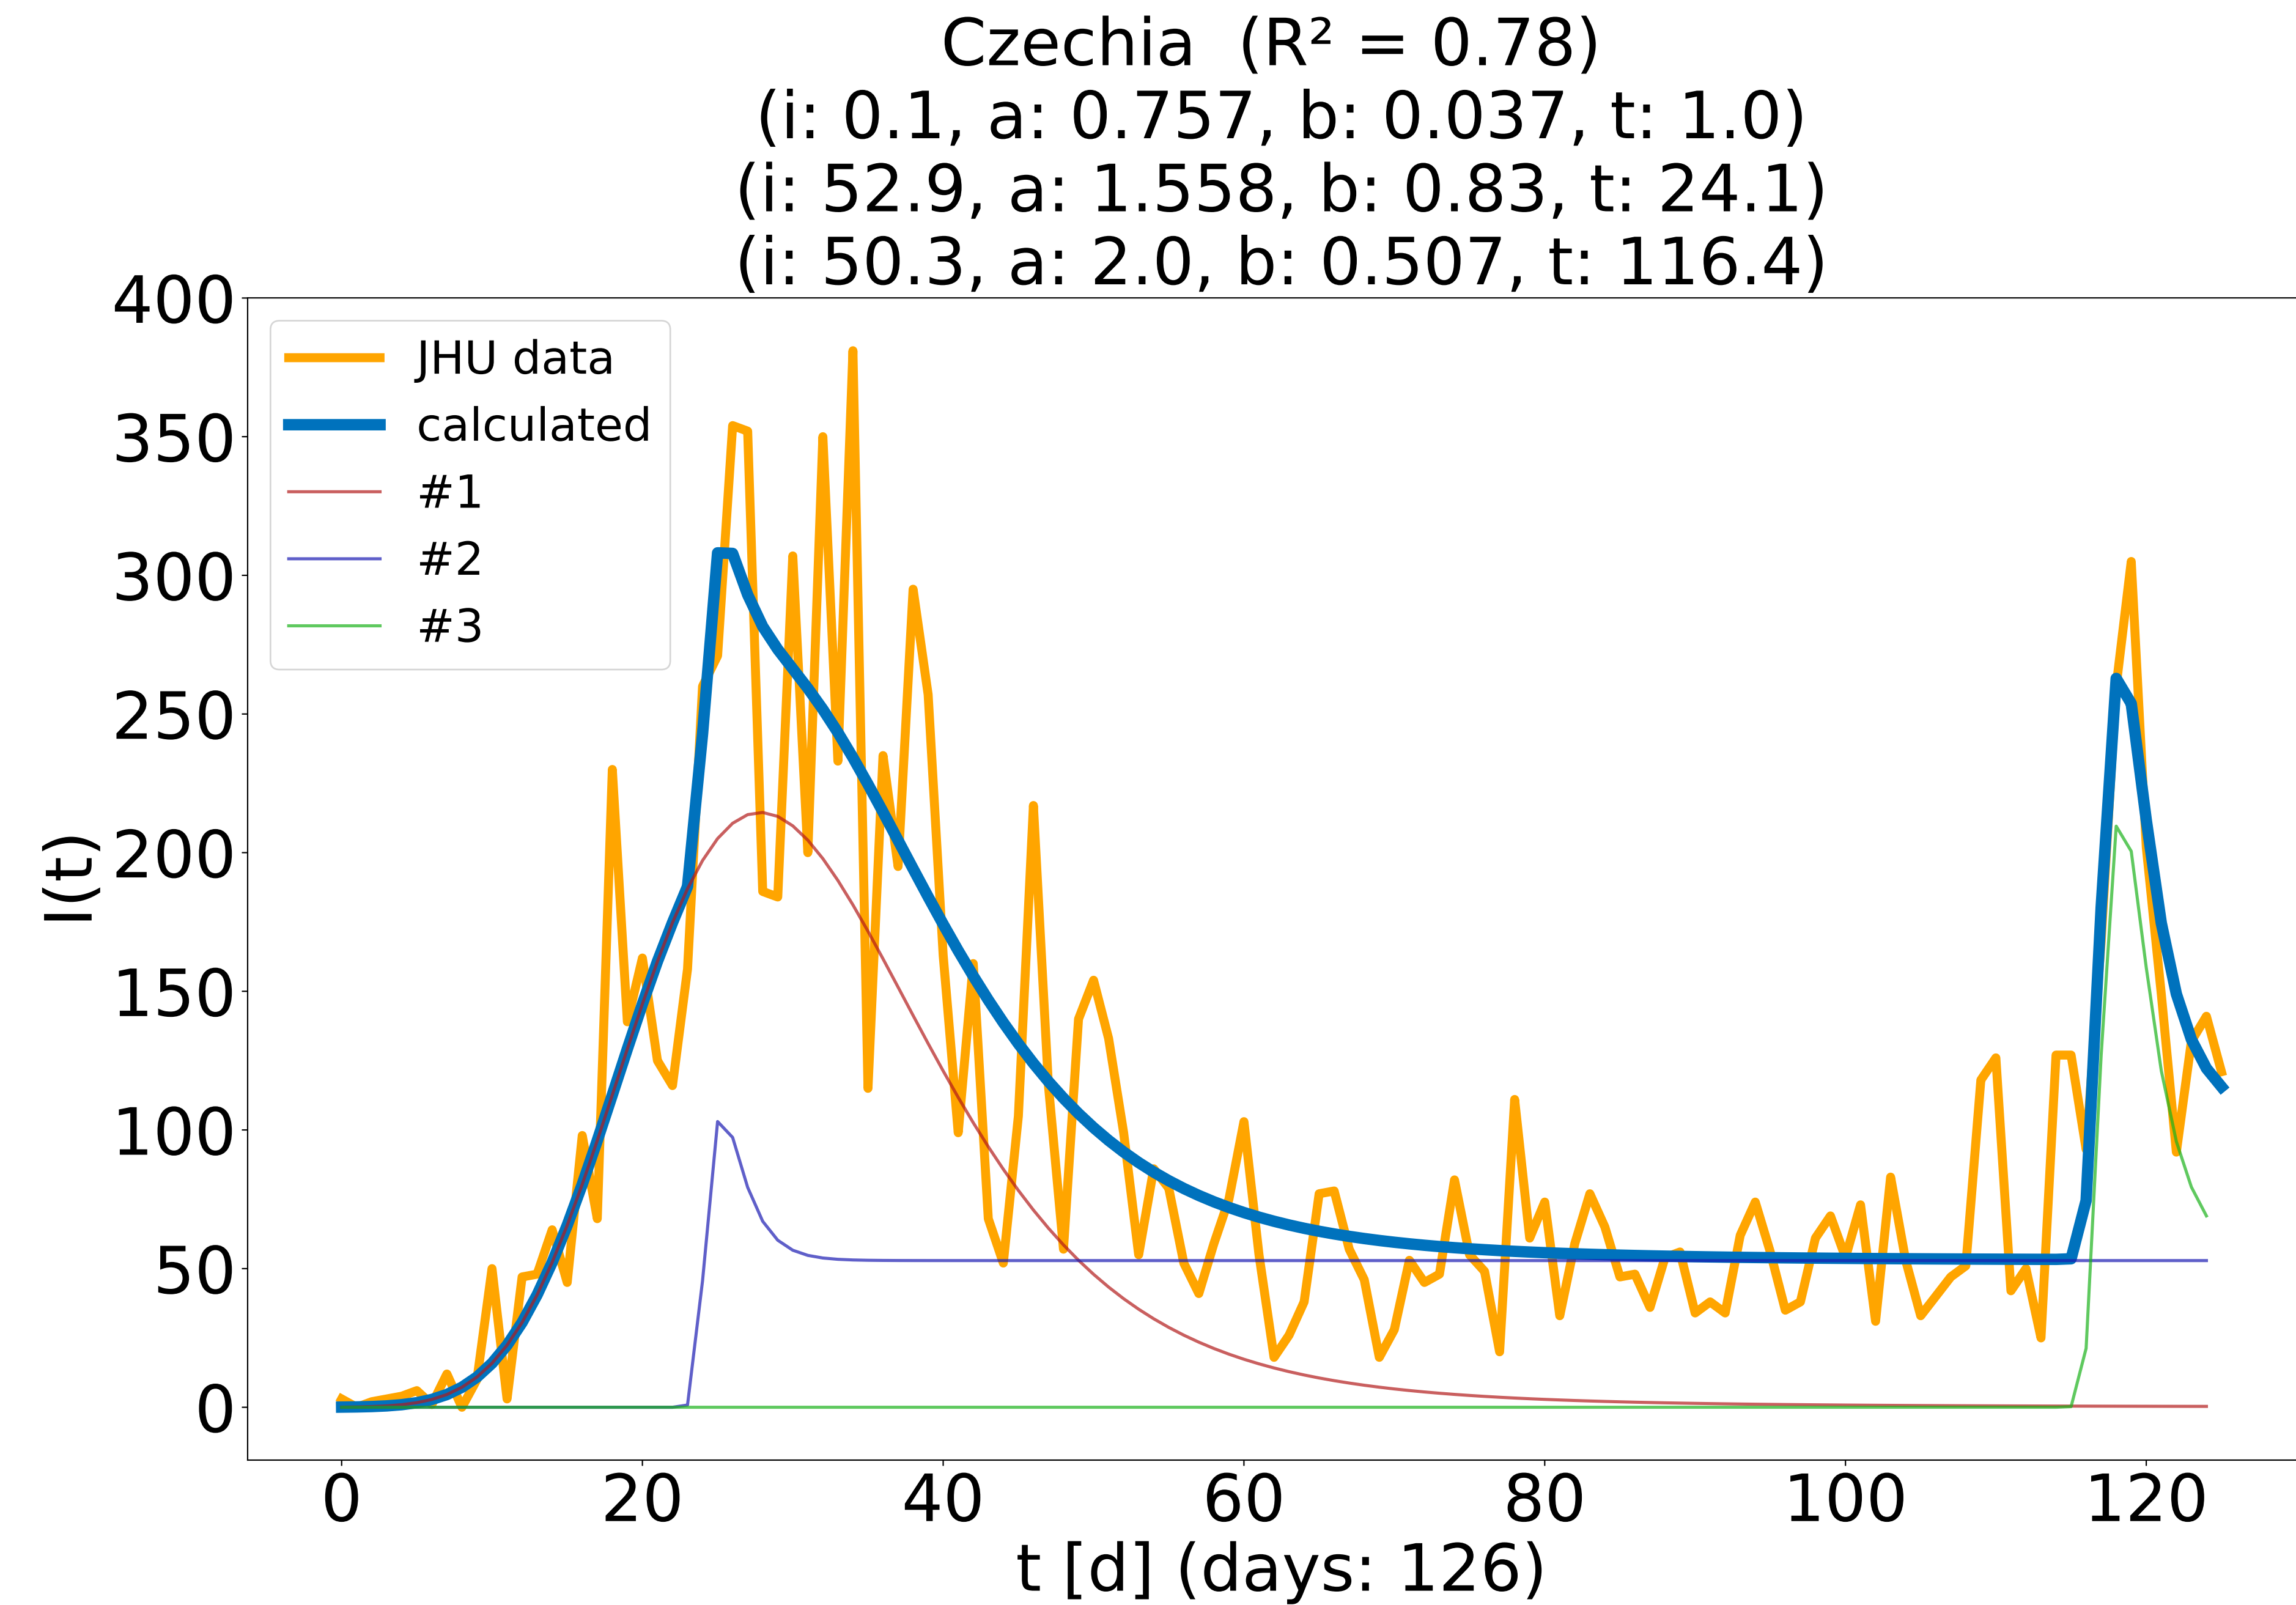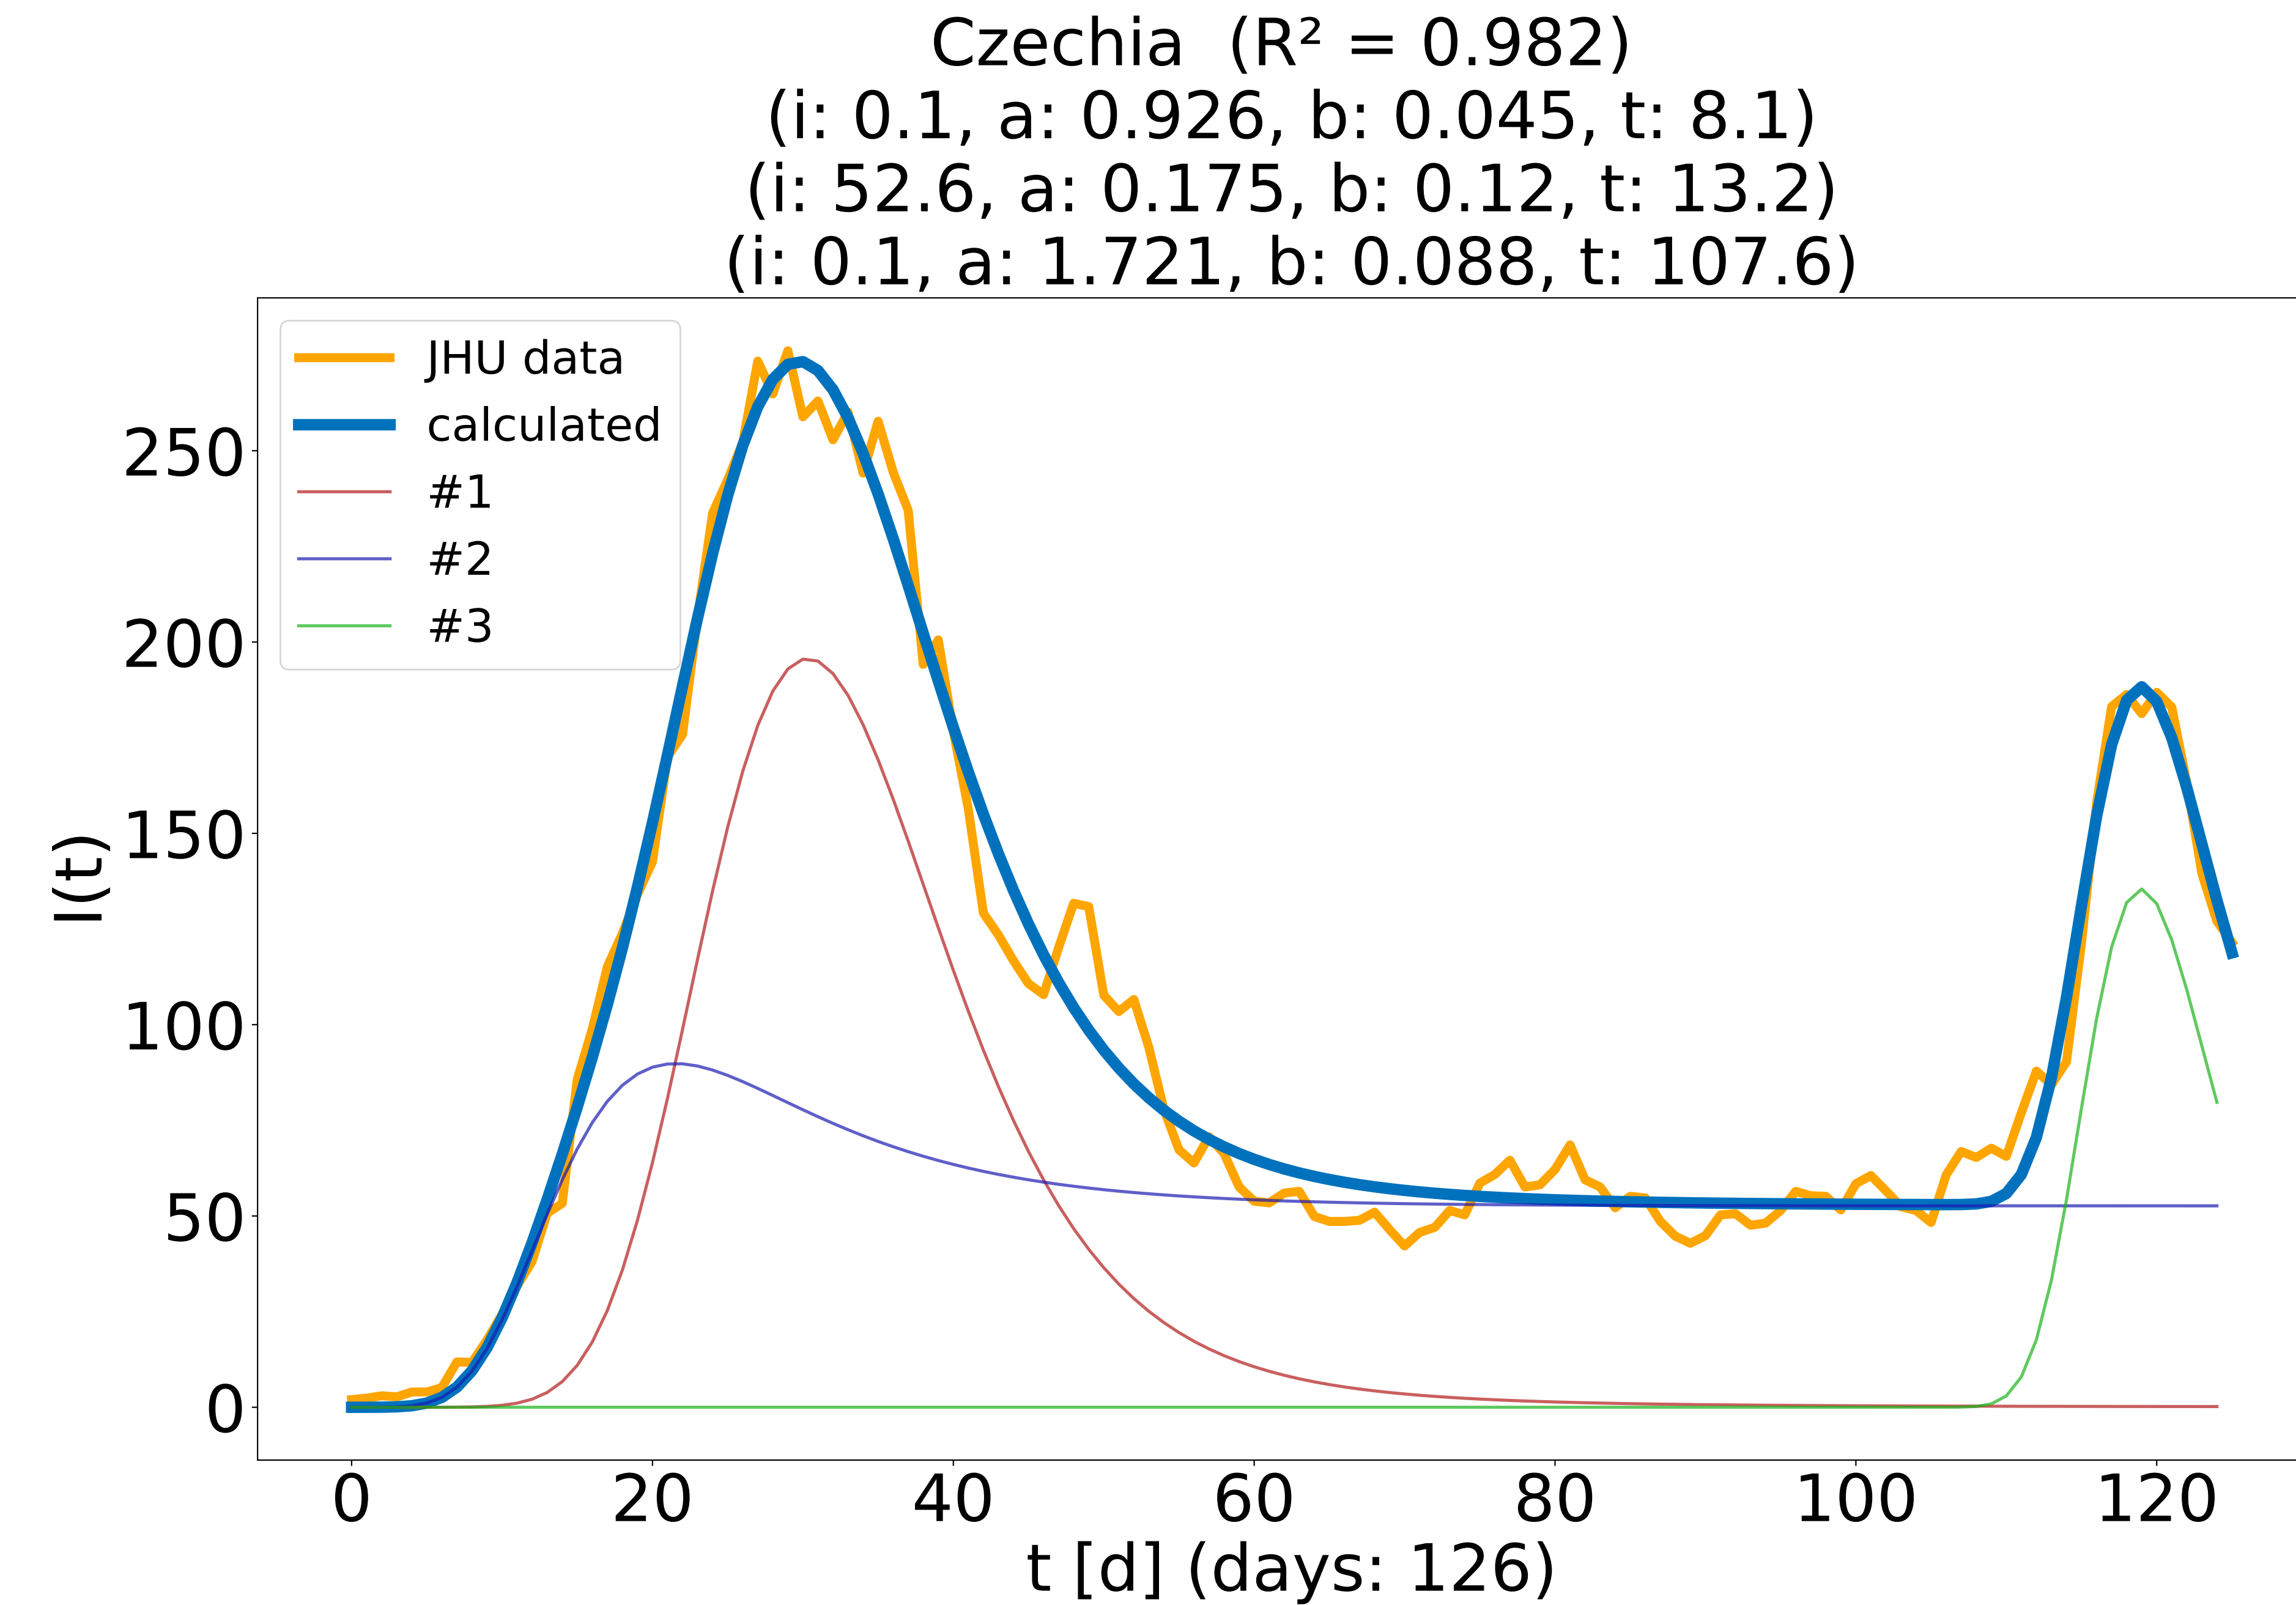

Denmark ( $R^2 = 0.752$ )

(i: 0.1, a: 0.58, b: 0.027, t: 1.0)

(i: 21.8, a: 0.284, b: 0.087, t: 54.5)

(i: 0.1, a: 1.204, b: 0.087, t: 100.7)

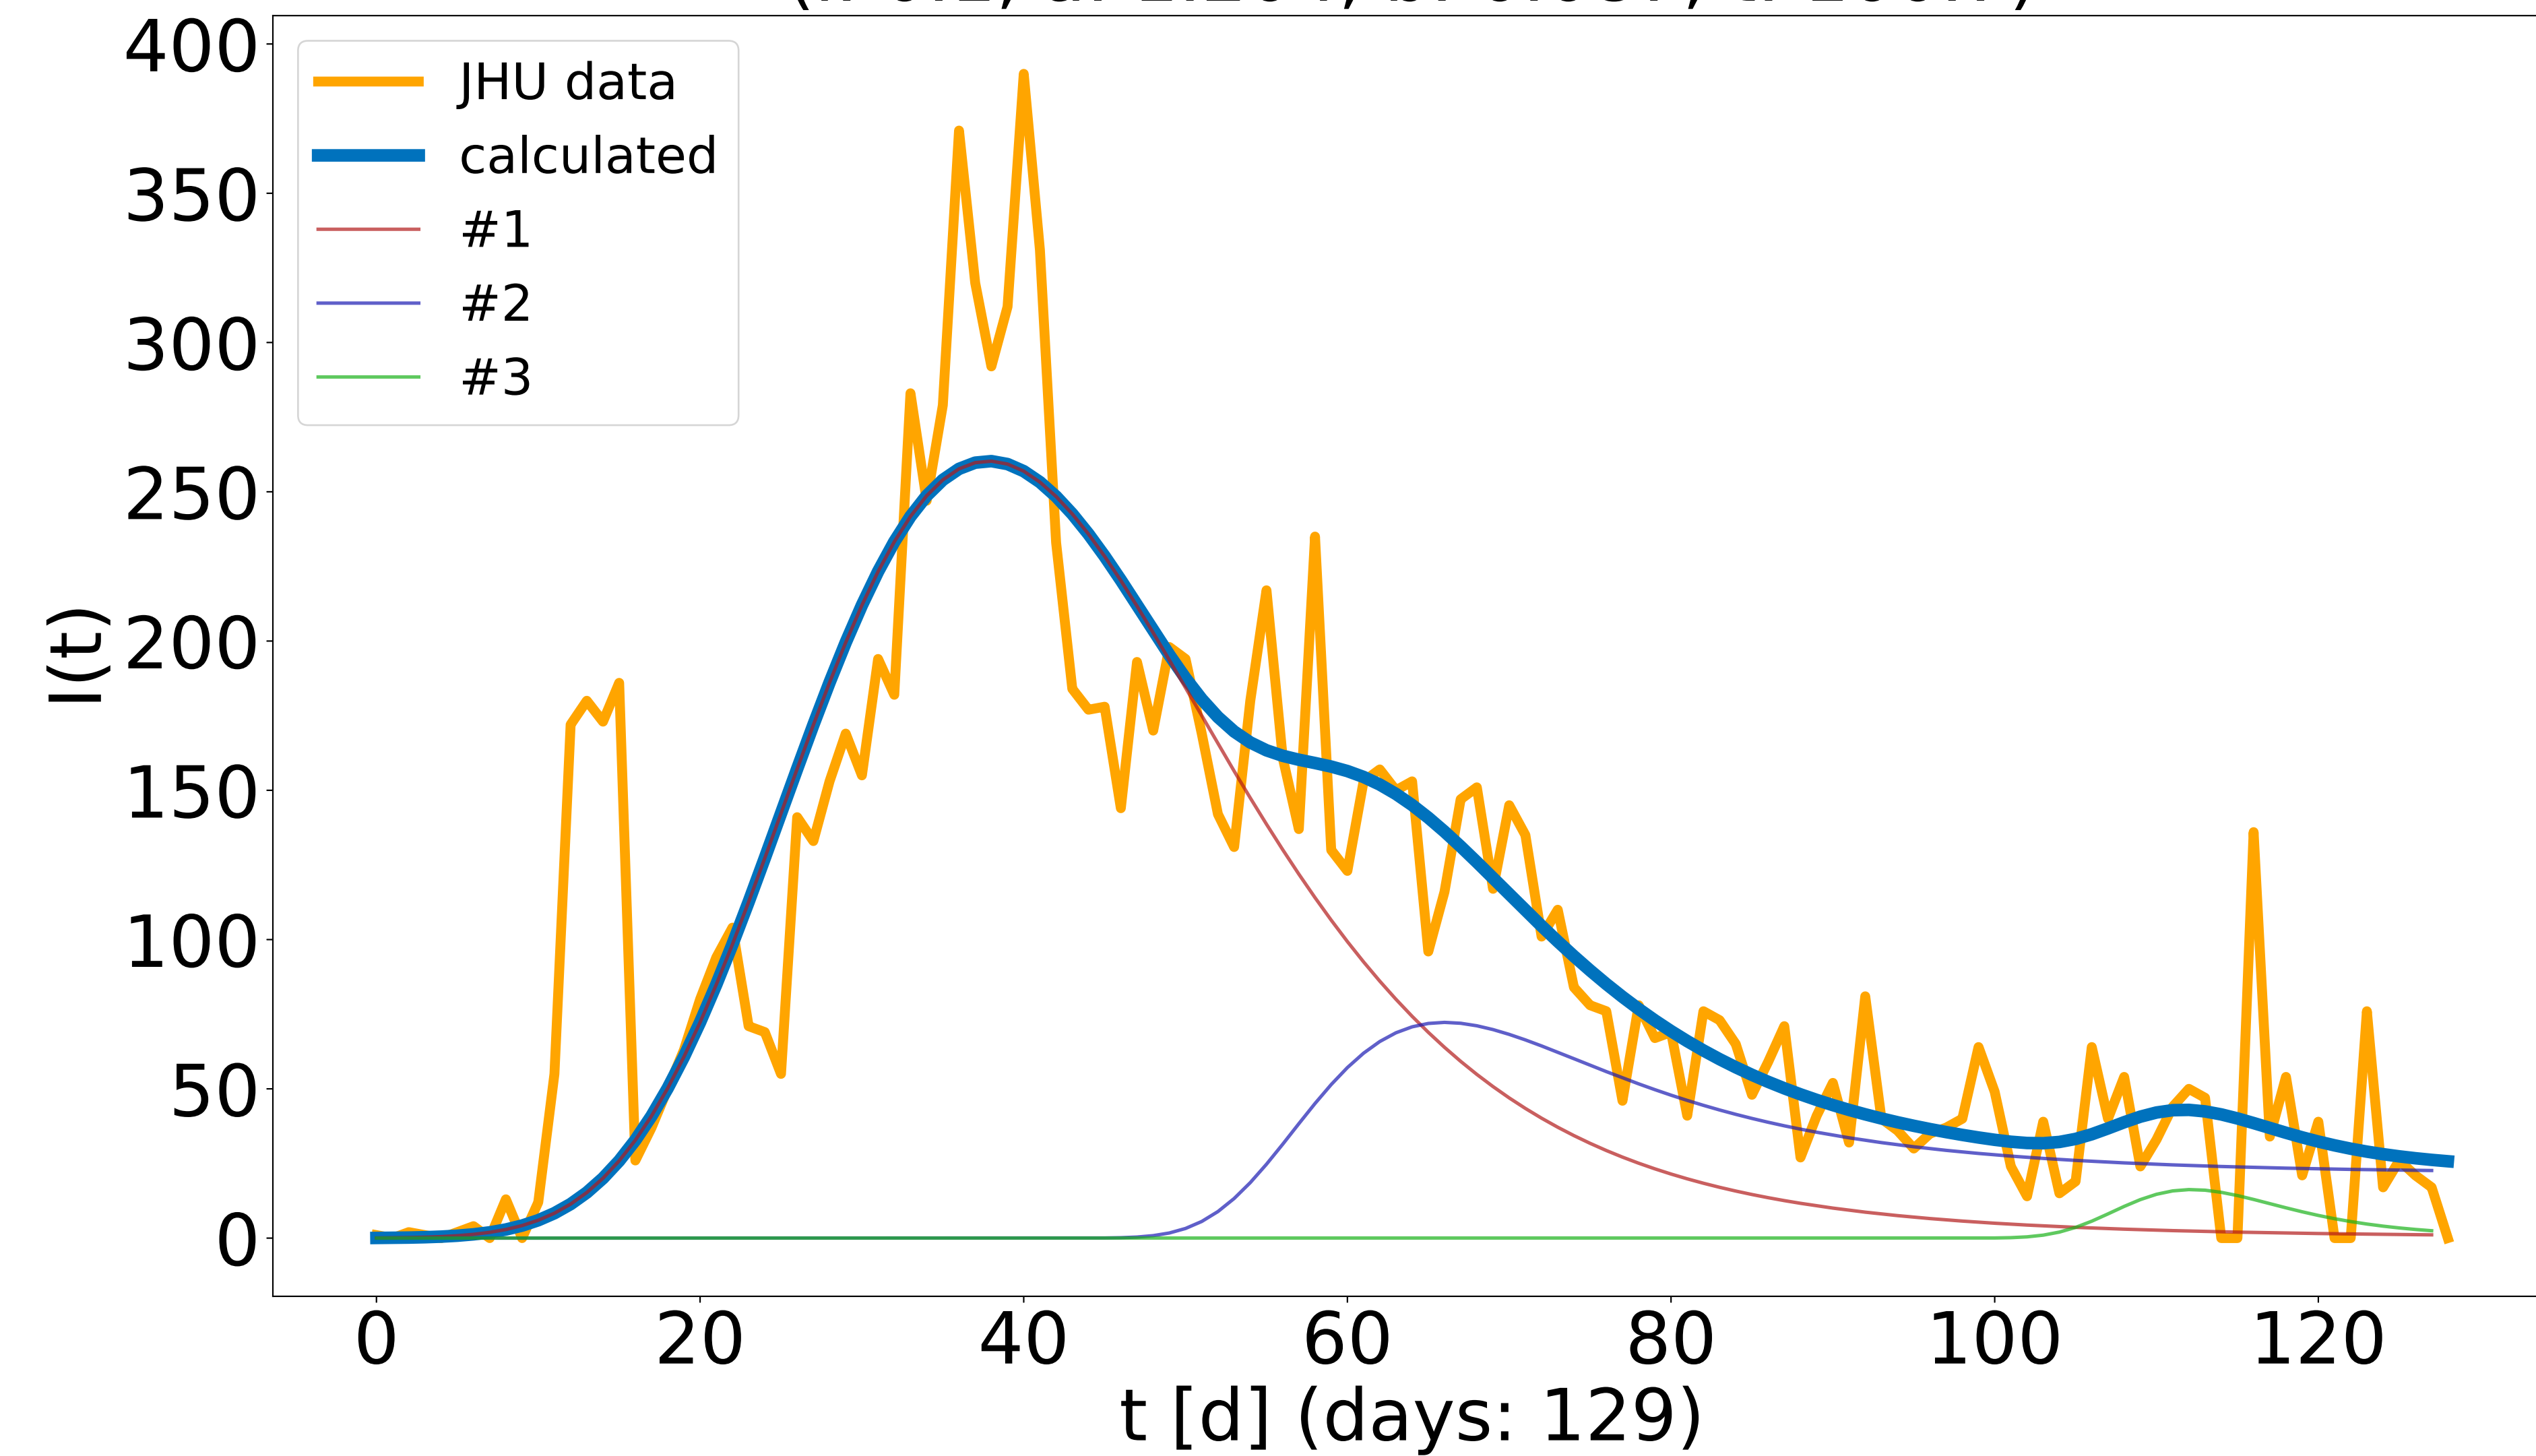

Denmark ( $R^2 = 0.986$ )

(i: 25.9, a: 0.73, b: 0.18, t: 8.4)

(i: 0.1, a: 1.026, b: 0.048, t: 16.2)

(i: 4.1, a: 0.52, b: 0.058, t: 43.7)

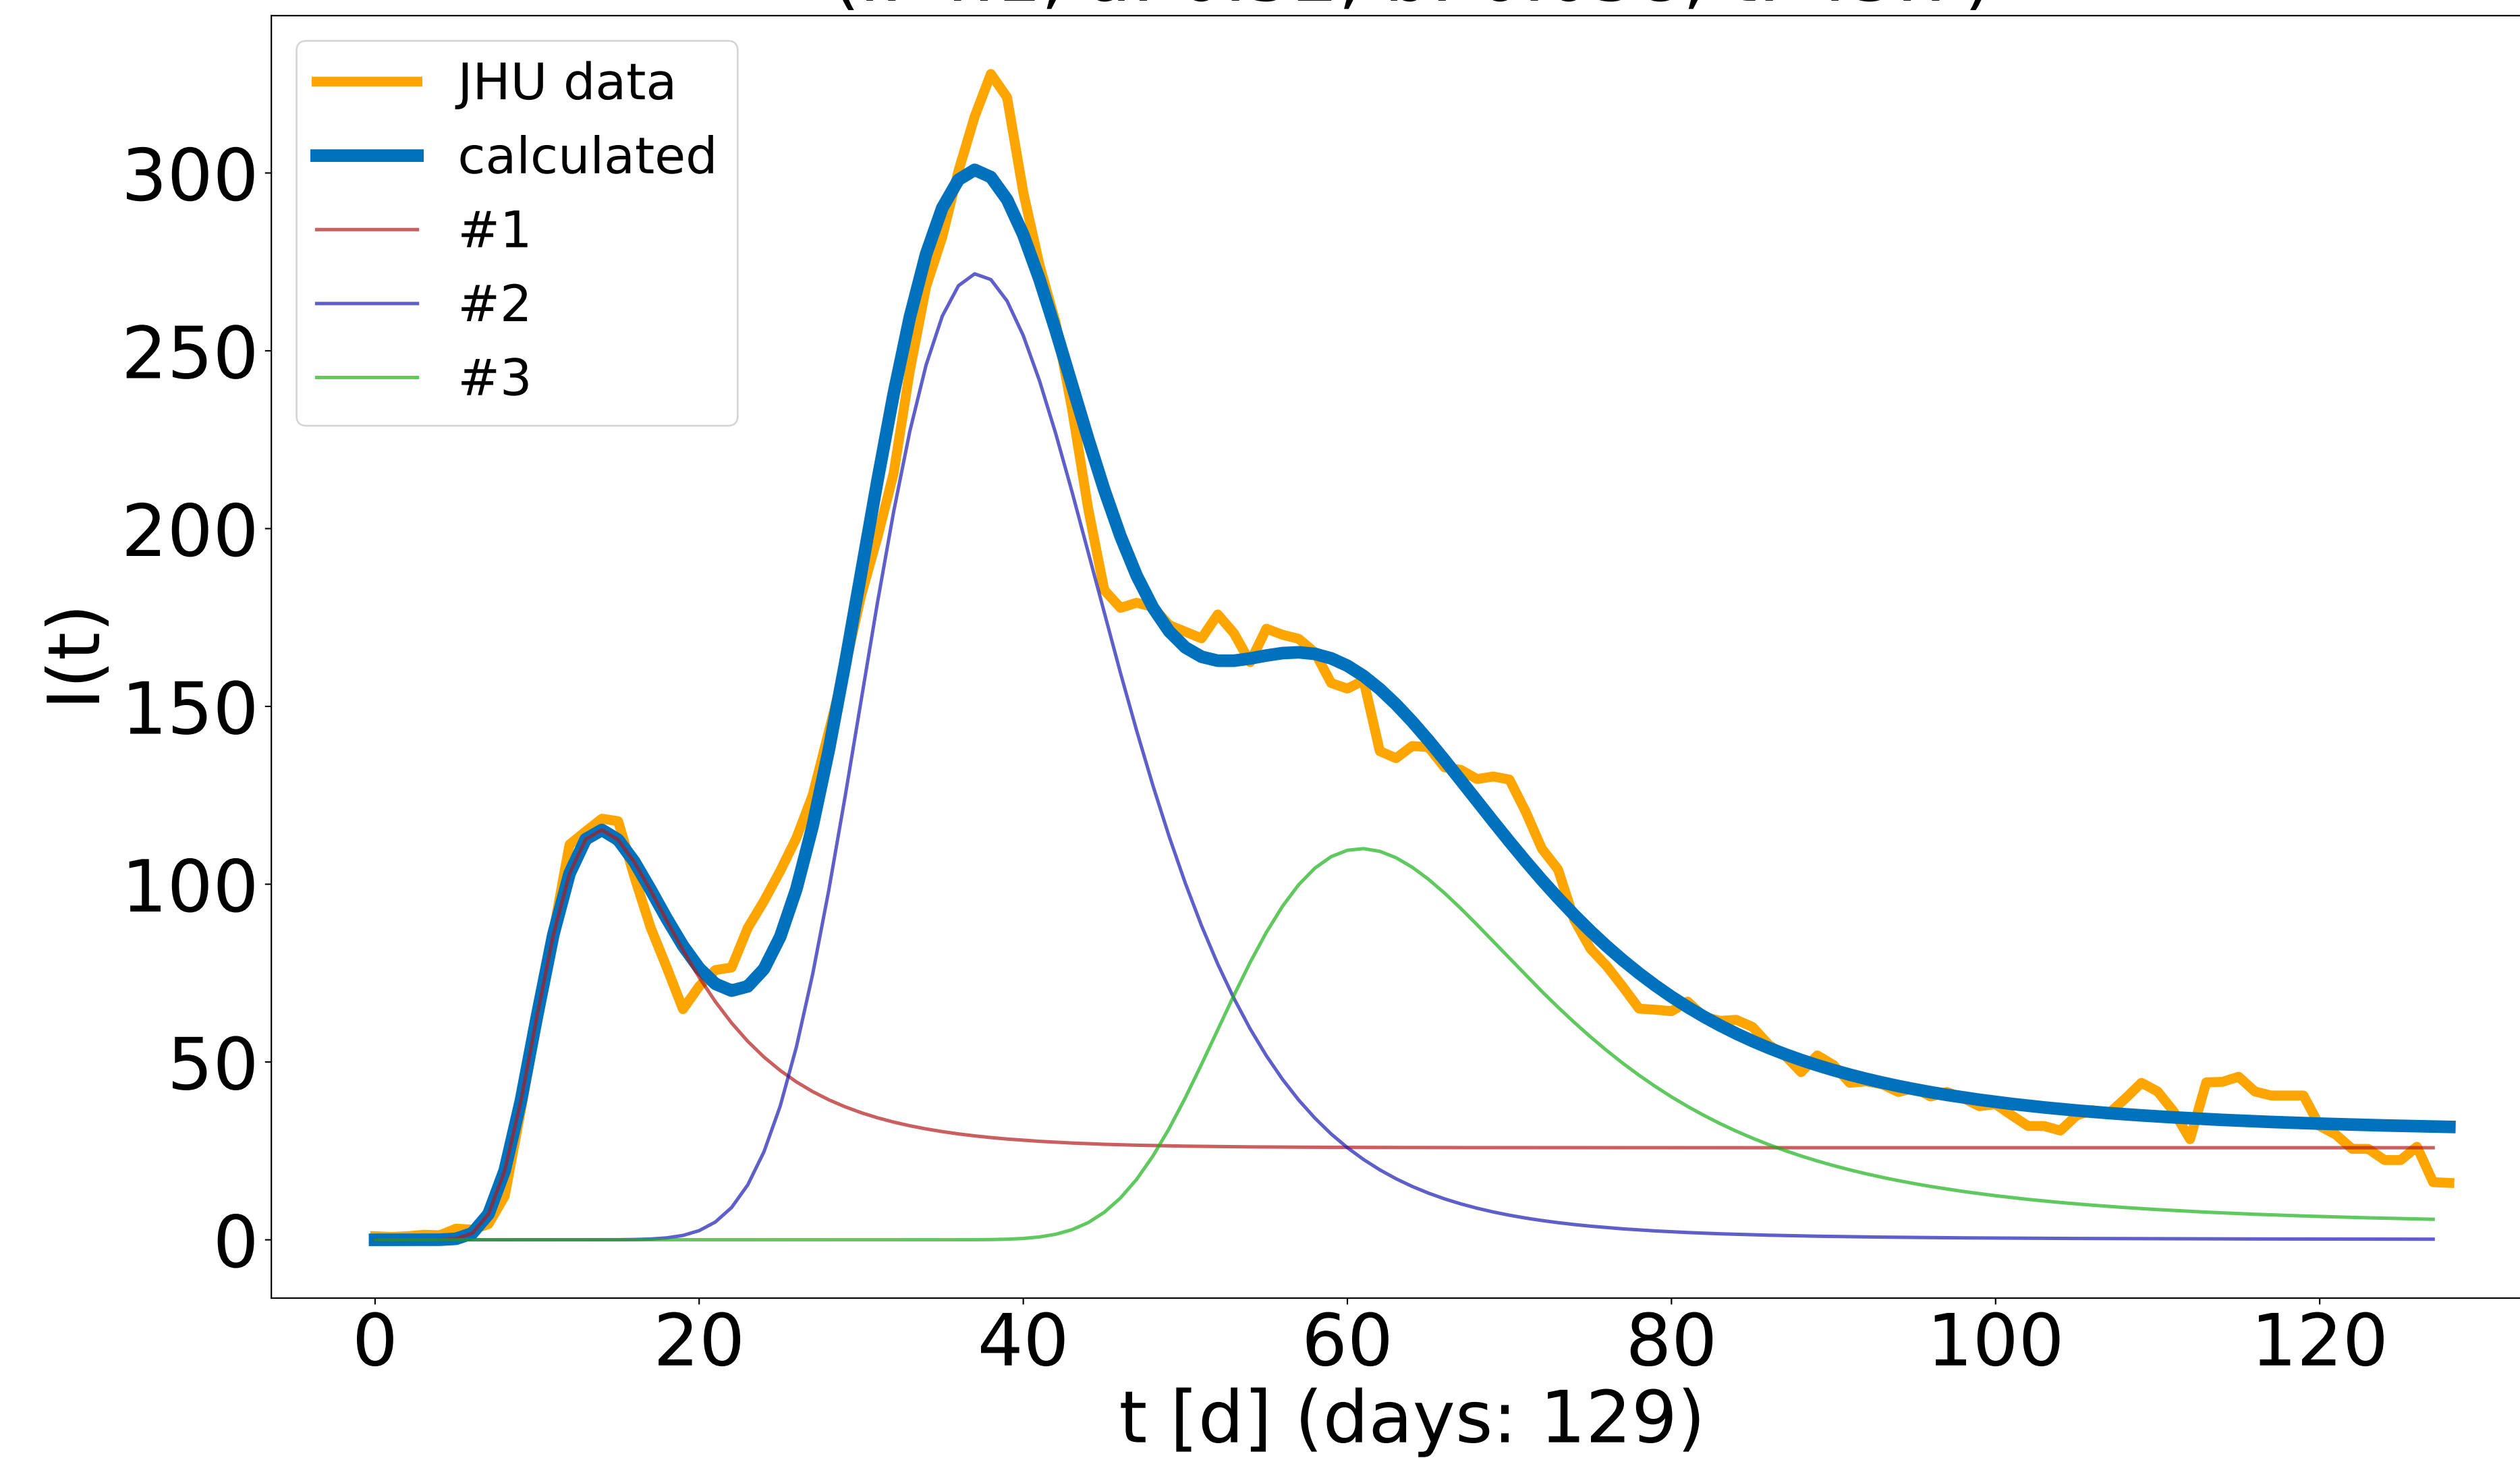

Finland ( $R^2 = 0.736$ )  
(i: 0.1, a: 0.376, b: 0.019, t: 20.7)  
(i: 2.2, a: 2.0, b: 0.256, t: 94.7)  
(i: 1.4, a: 2.0, b: 0.298, t: 116.7)

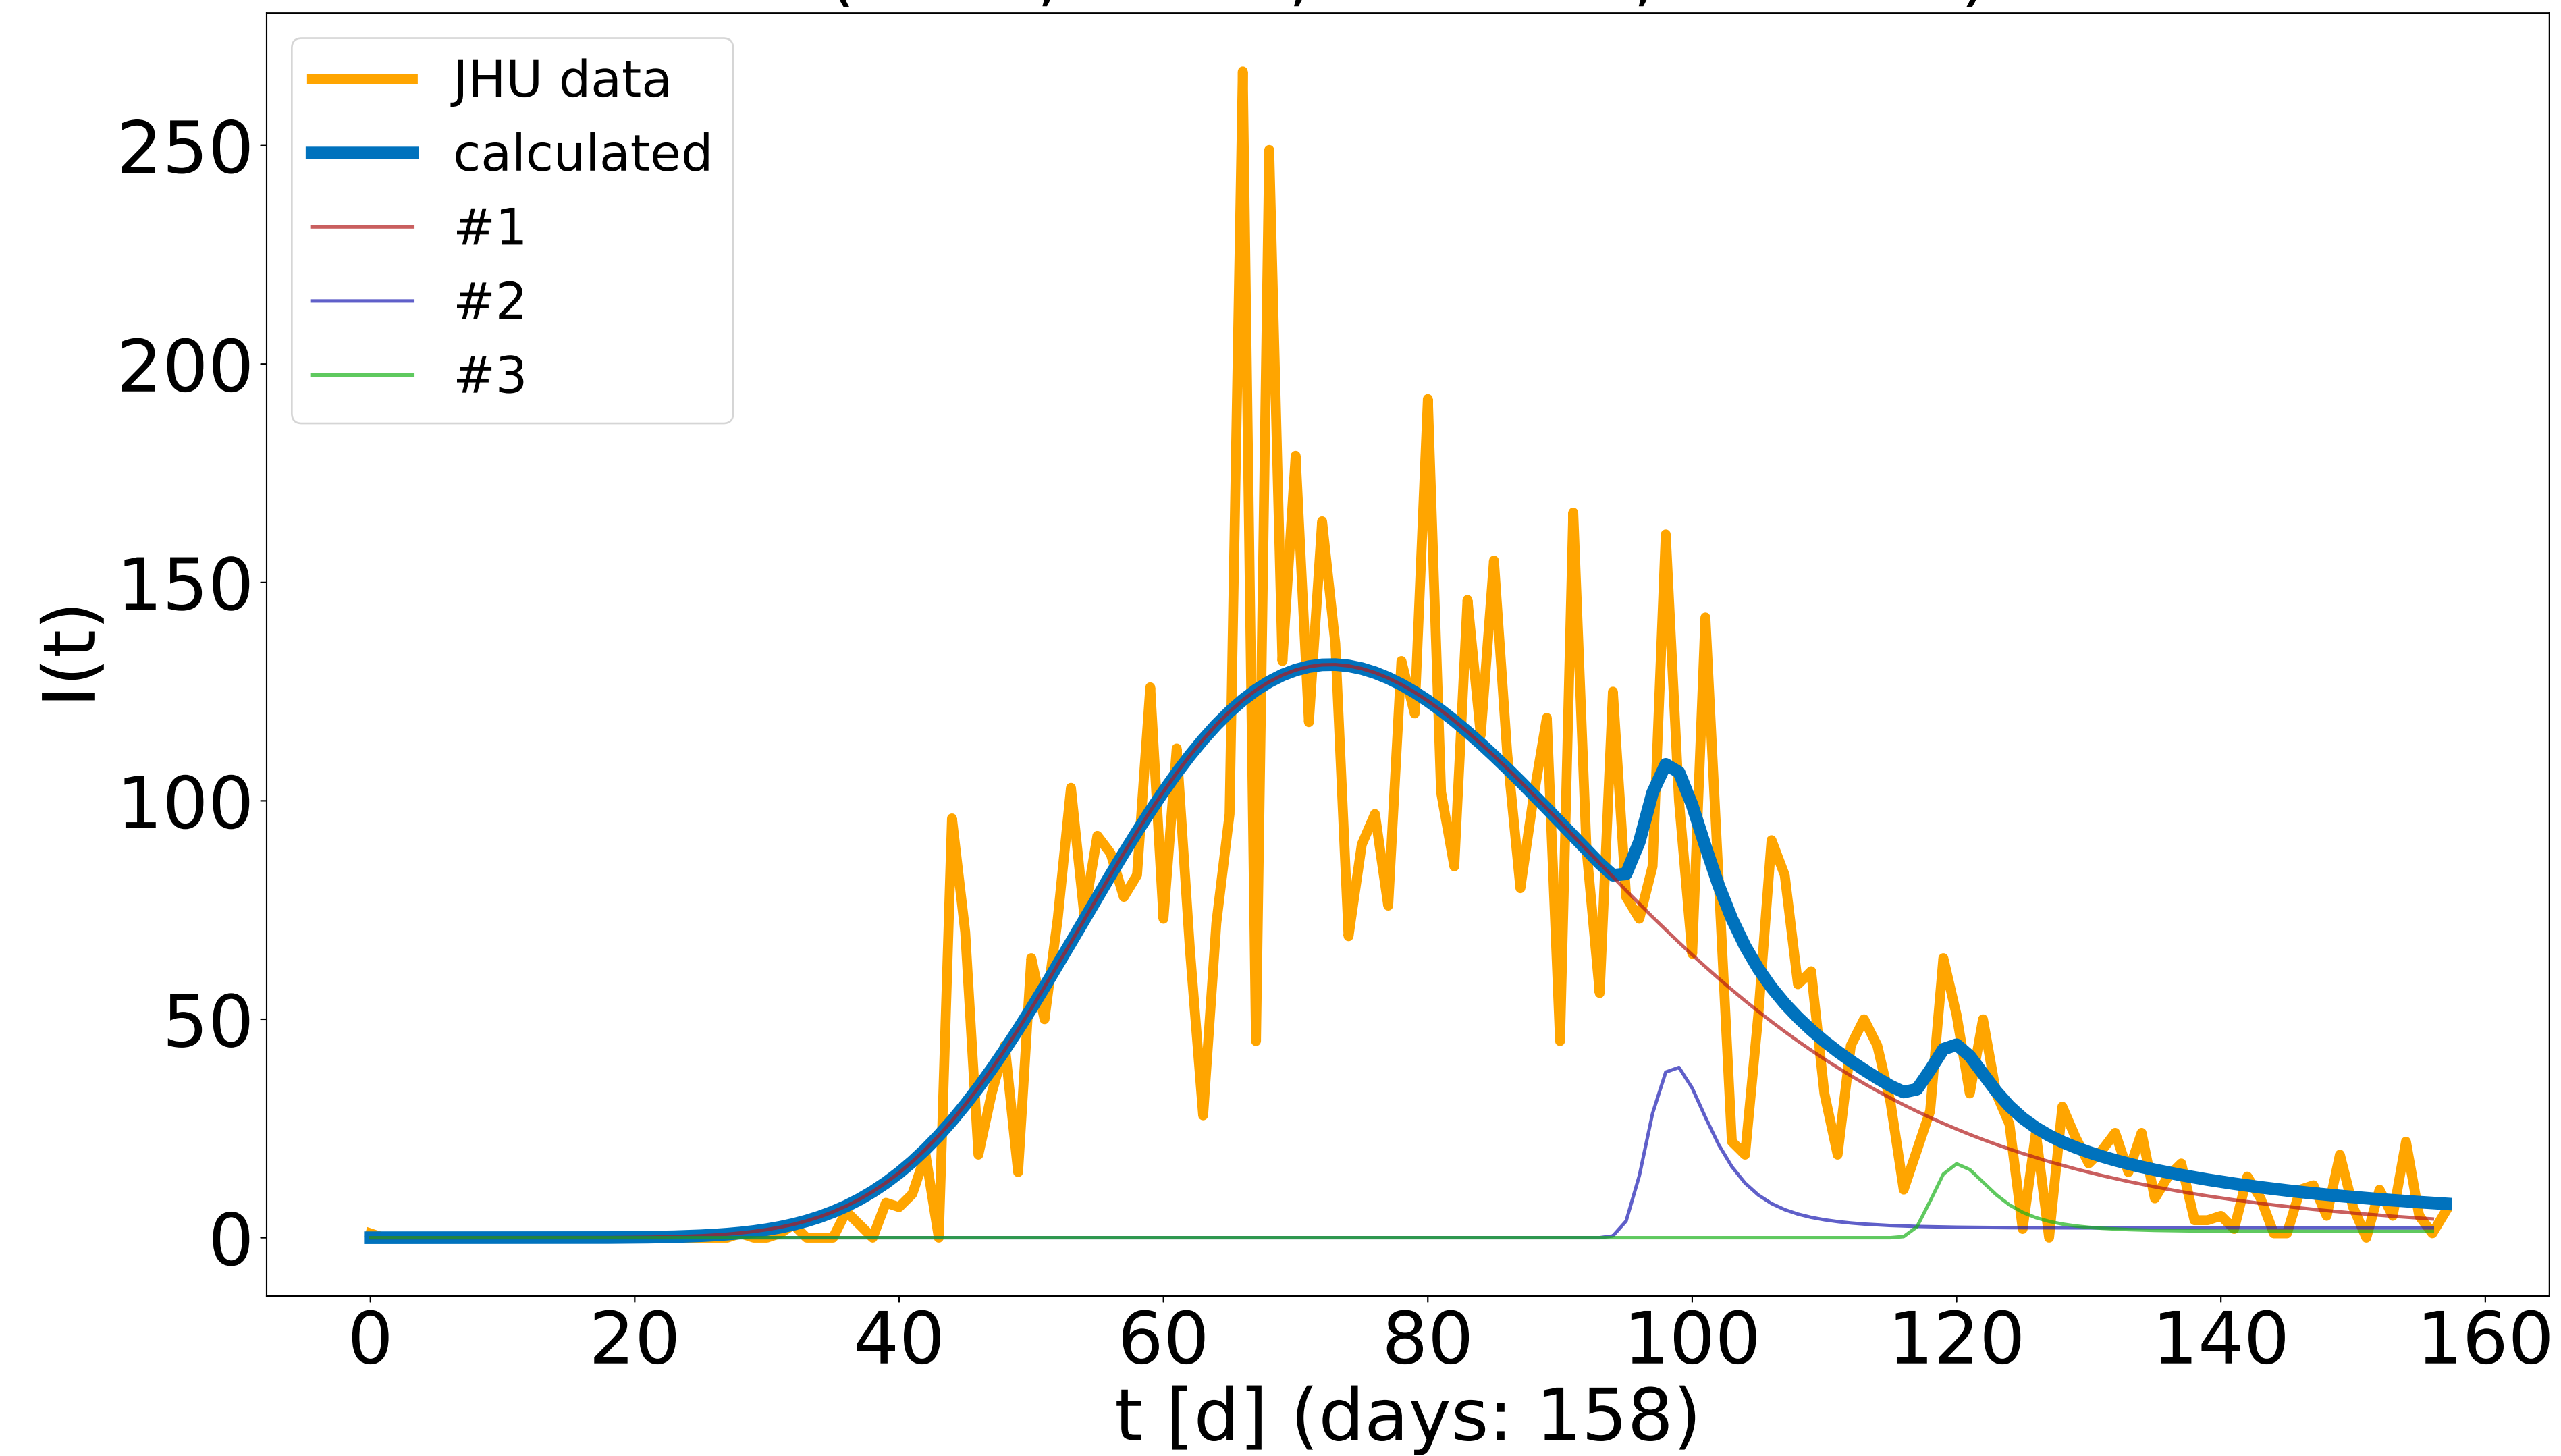

Finland ( $R^2 = 0.985$ )  
(i: 0.1, a: 0.57, b: 0.031, t: 27.2)  
(i: 1.0, a: 0.4, b: 0.032, t: 57.5)  
(i: 1.3, a: 2.0, b: 0.185, t: 62.8)

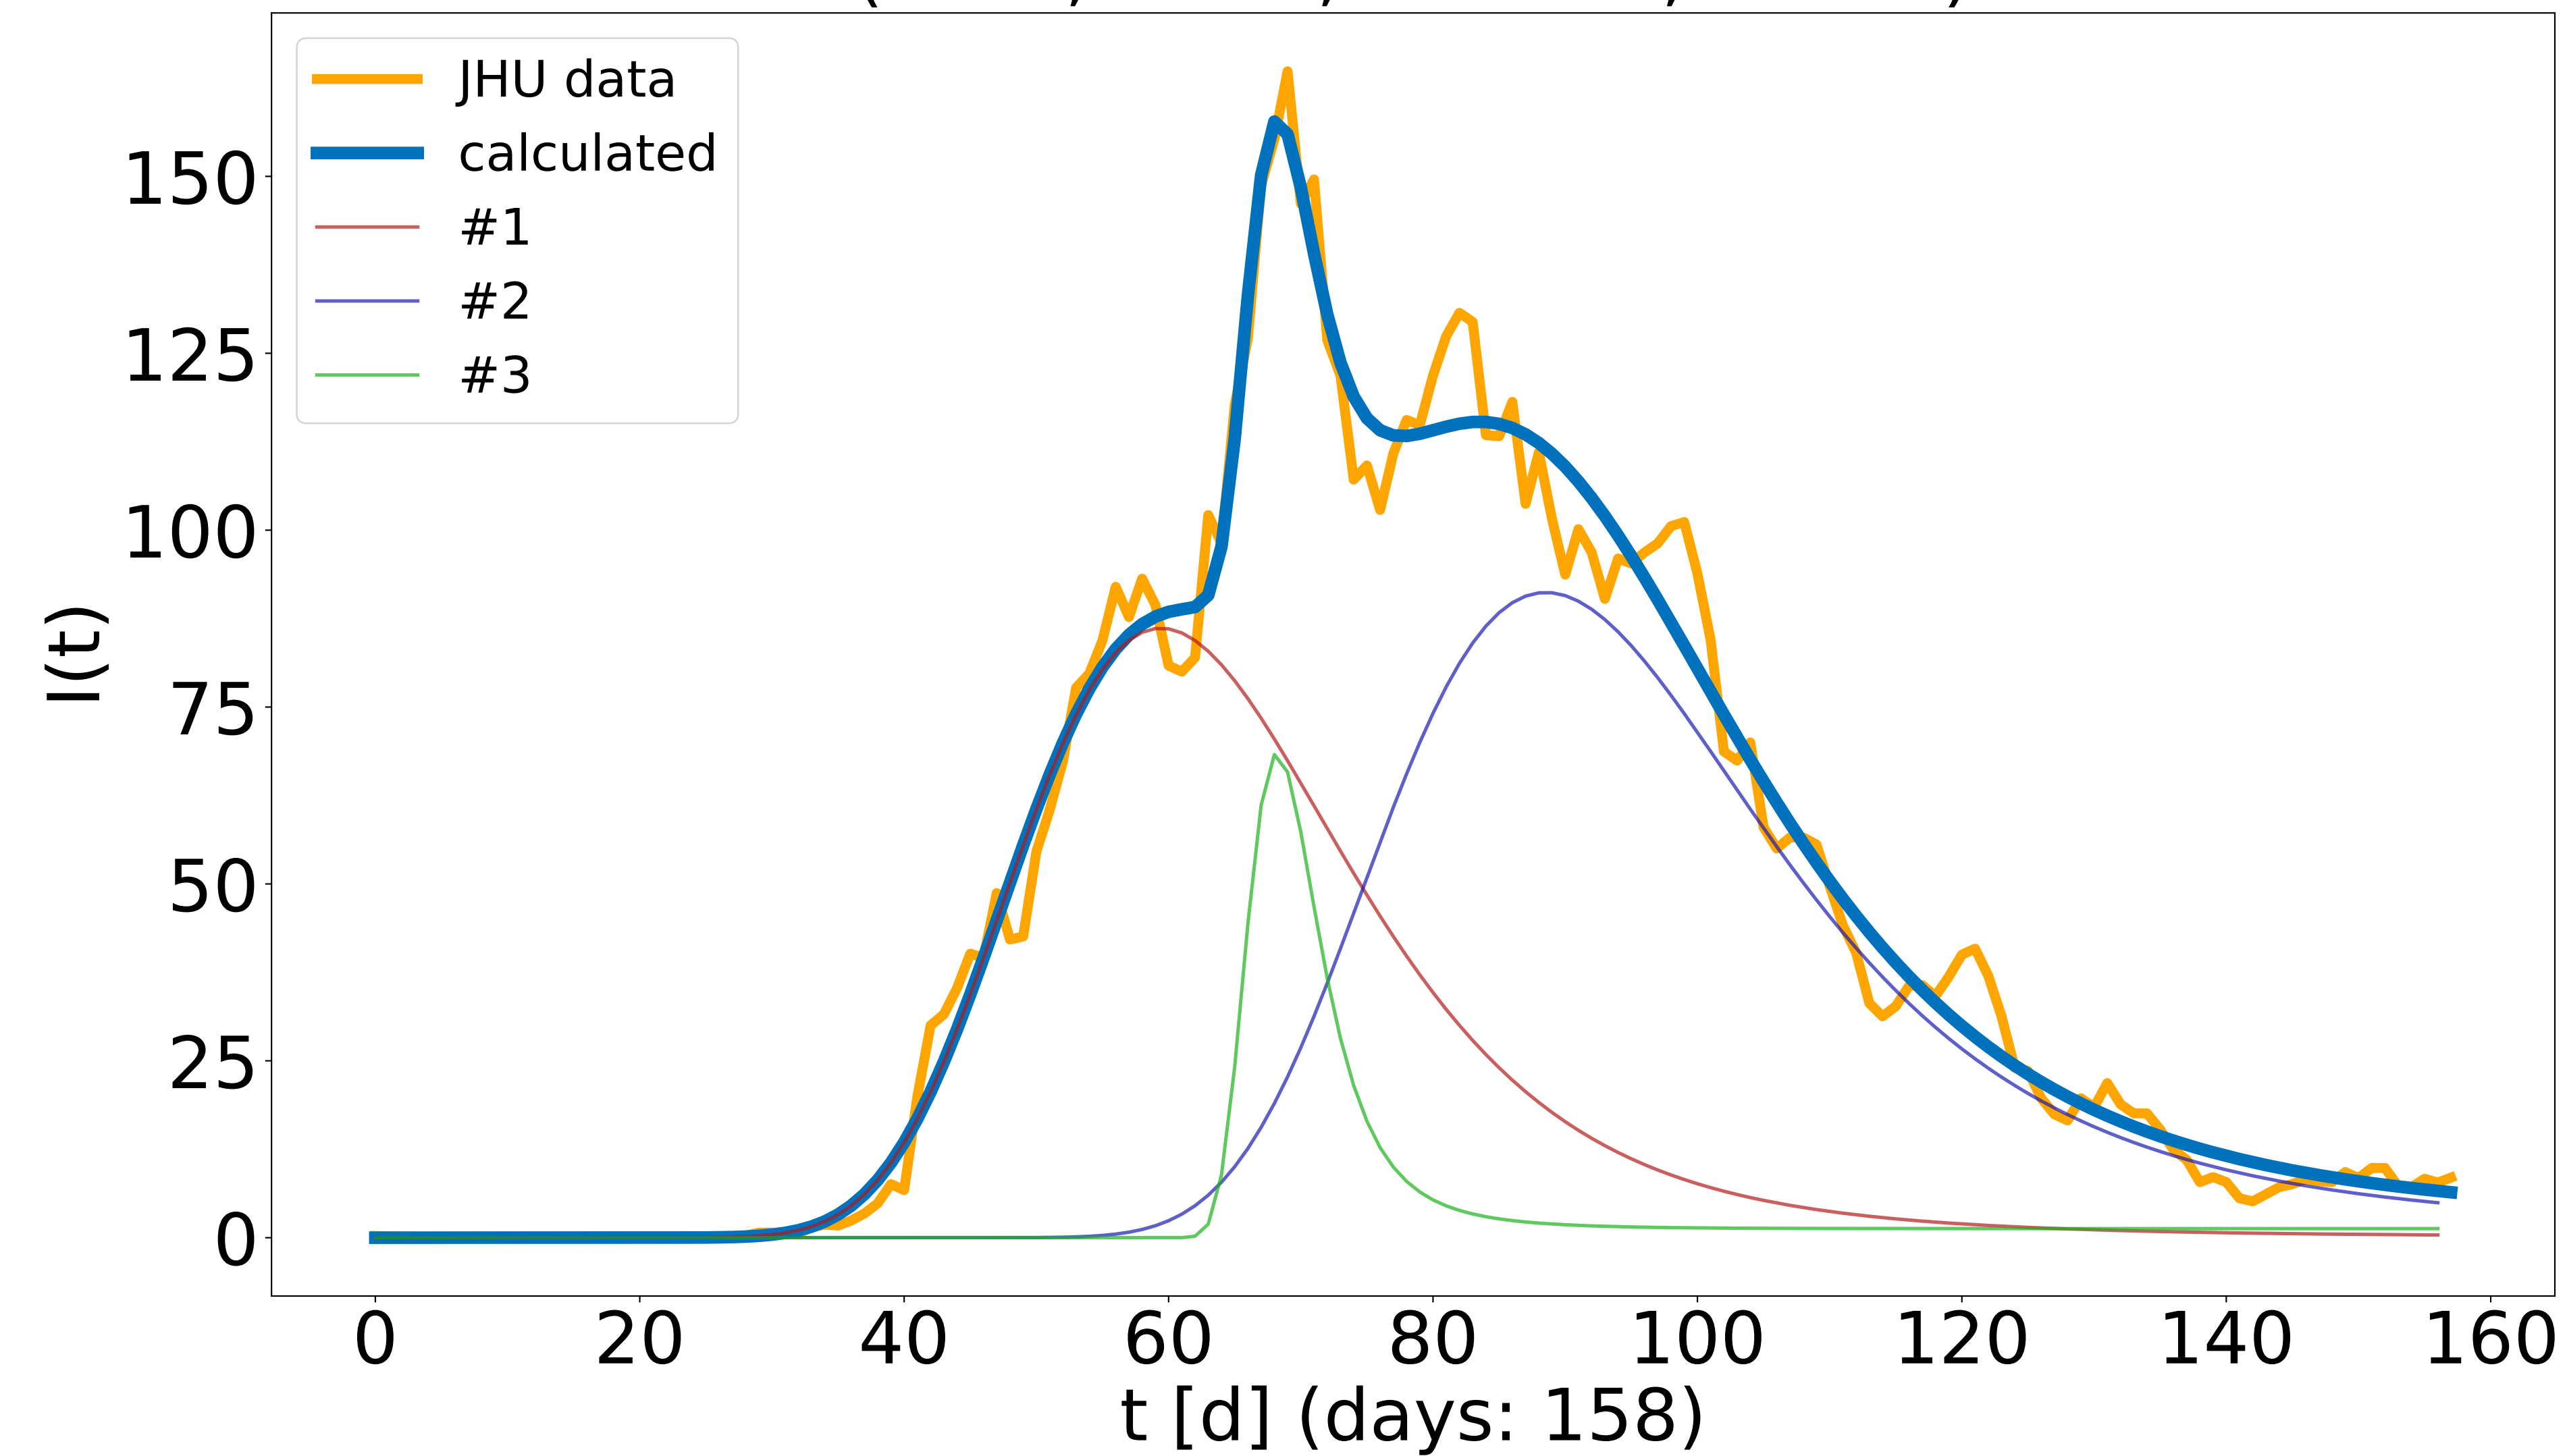

France ( $R^2 = 0.534$ )  
(i: 0.1, a: 1.021, b: 0.035, t: 37.8)  
(i: 609.7, a: 2.0, b: 0.277, t: 75.7)  
(i: 9.5, a: 2.0, b: 0.242, t: 121.5)

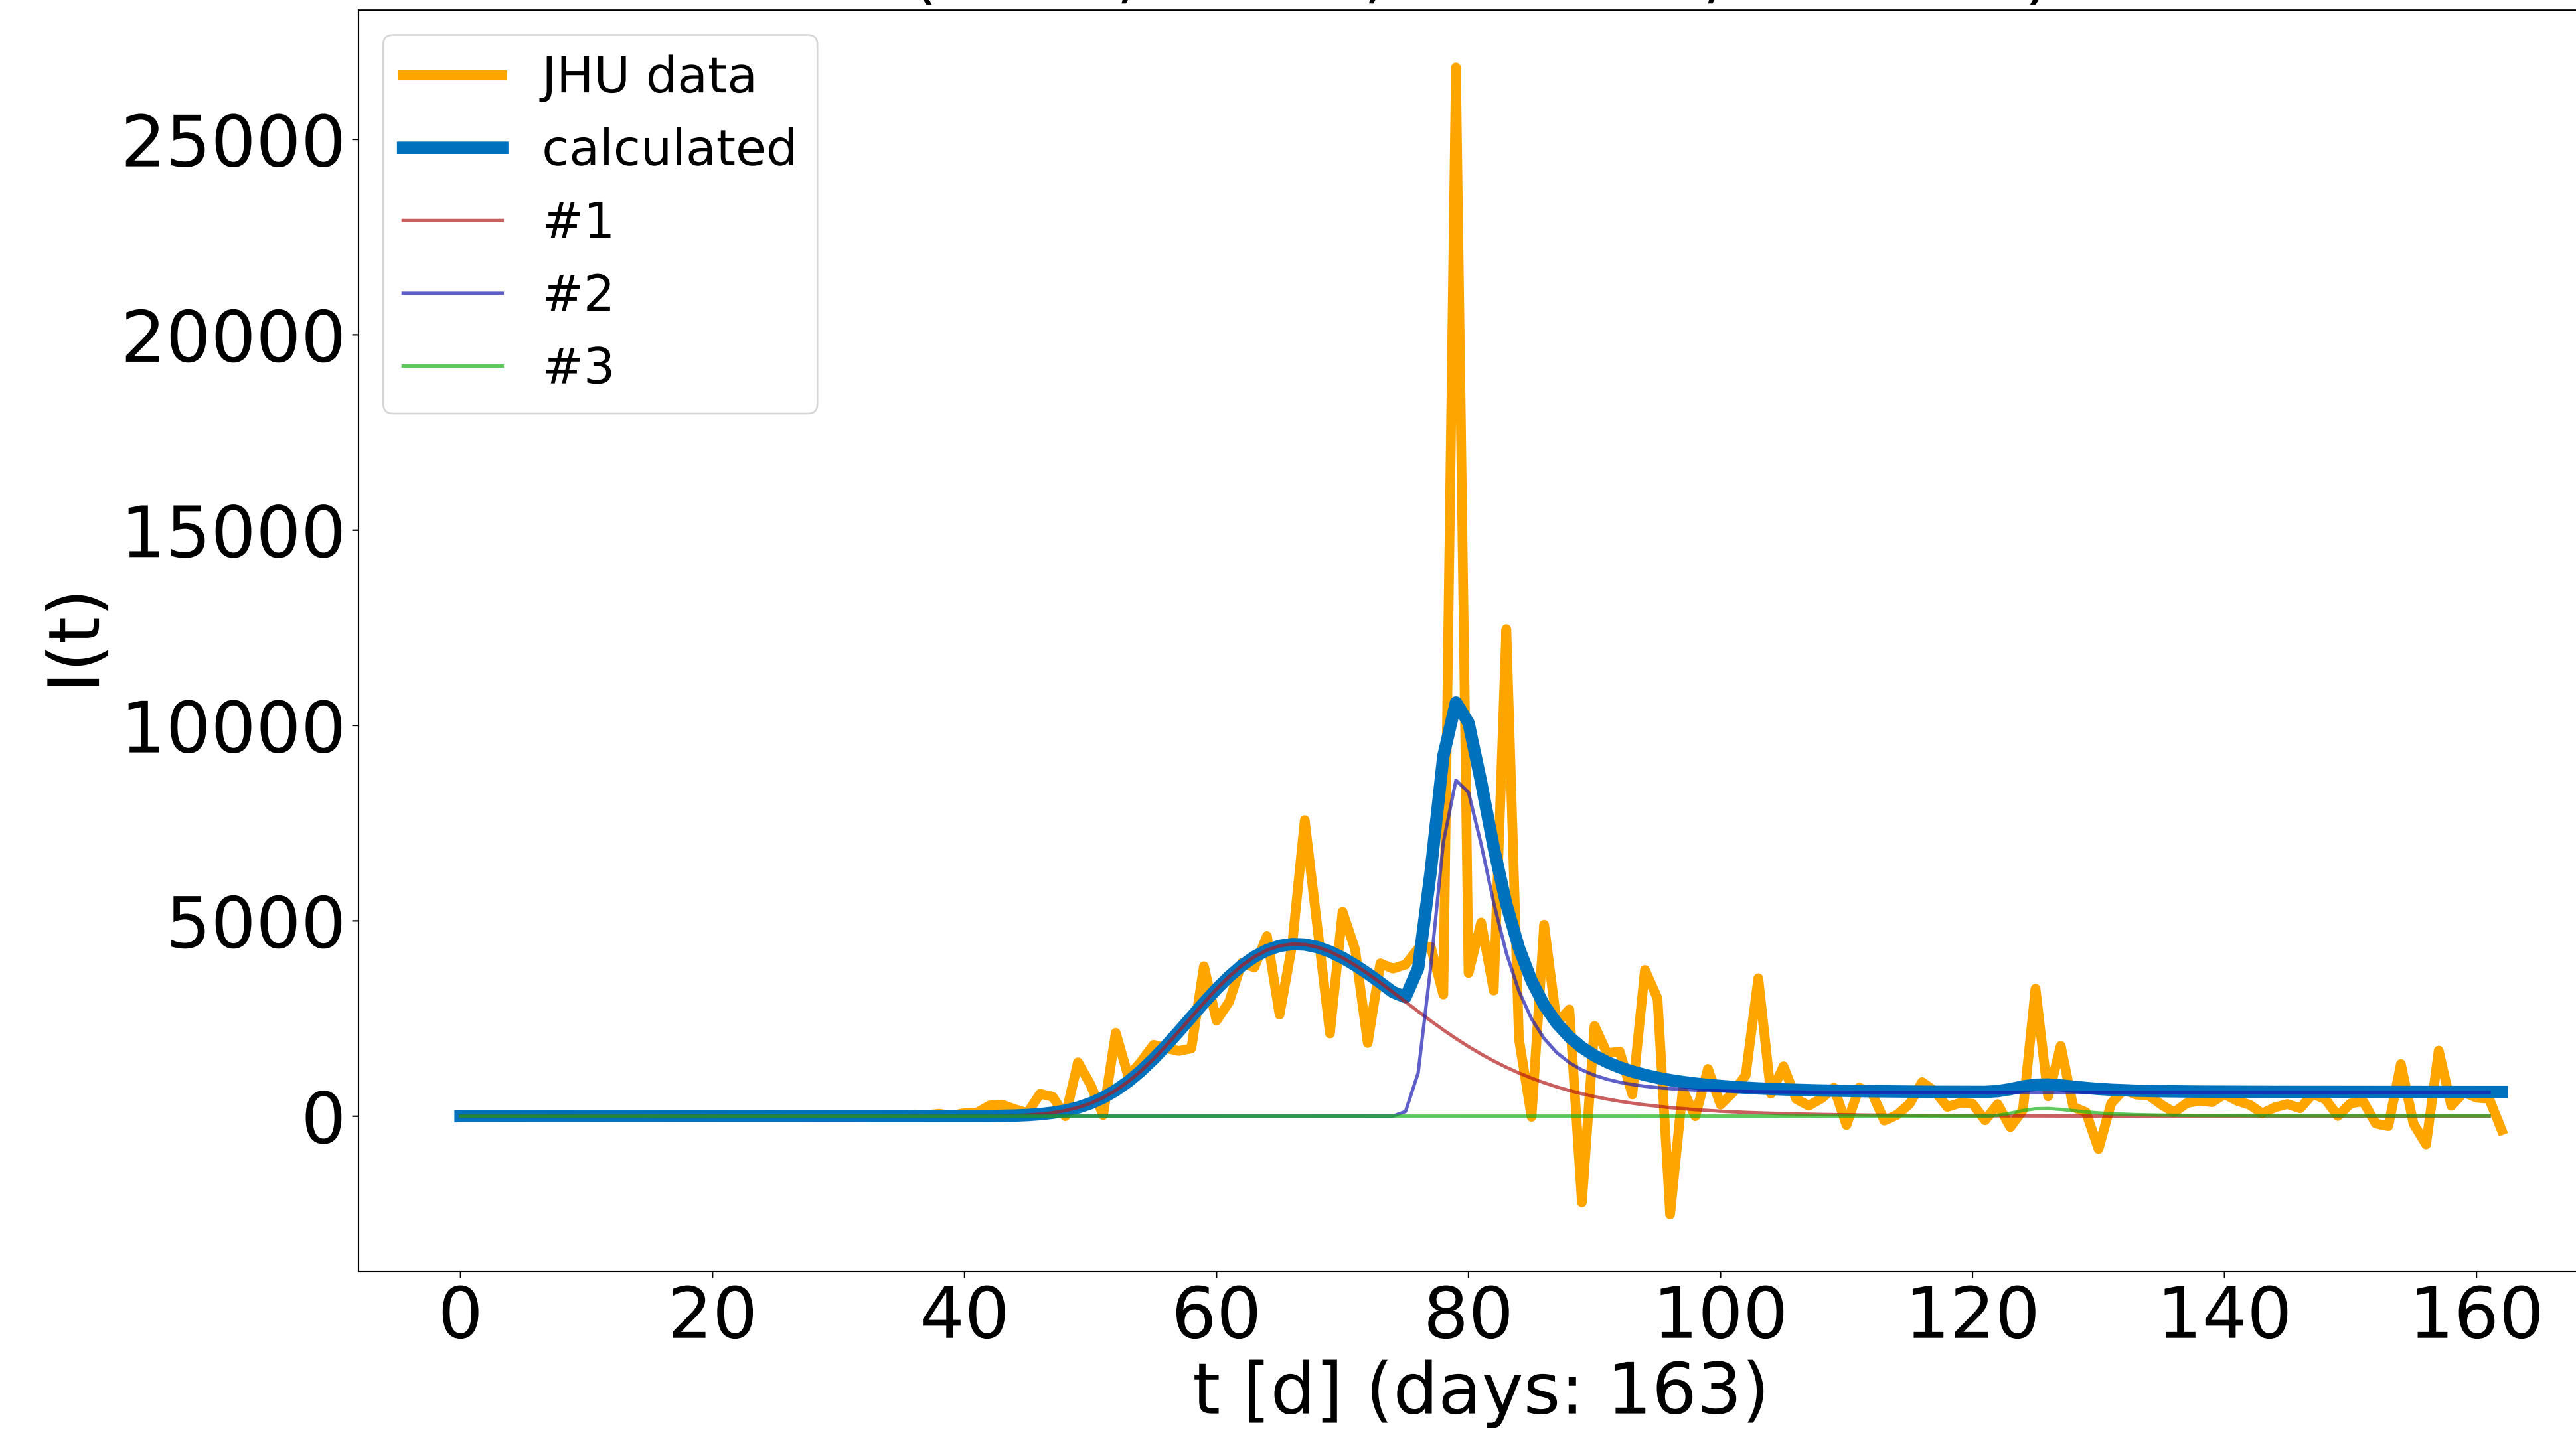

France ( $R^2 = 0.977$ )  
(i: 295.3, a: 0.282, b: 0.054, t: 44.8)  
(i: 0.1, a: 1.502, b: 0.055, t: 48.9)  
(i: 18.5, a: 2.0, b: 0.126, t: 71.4)

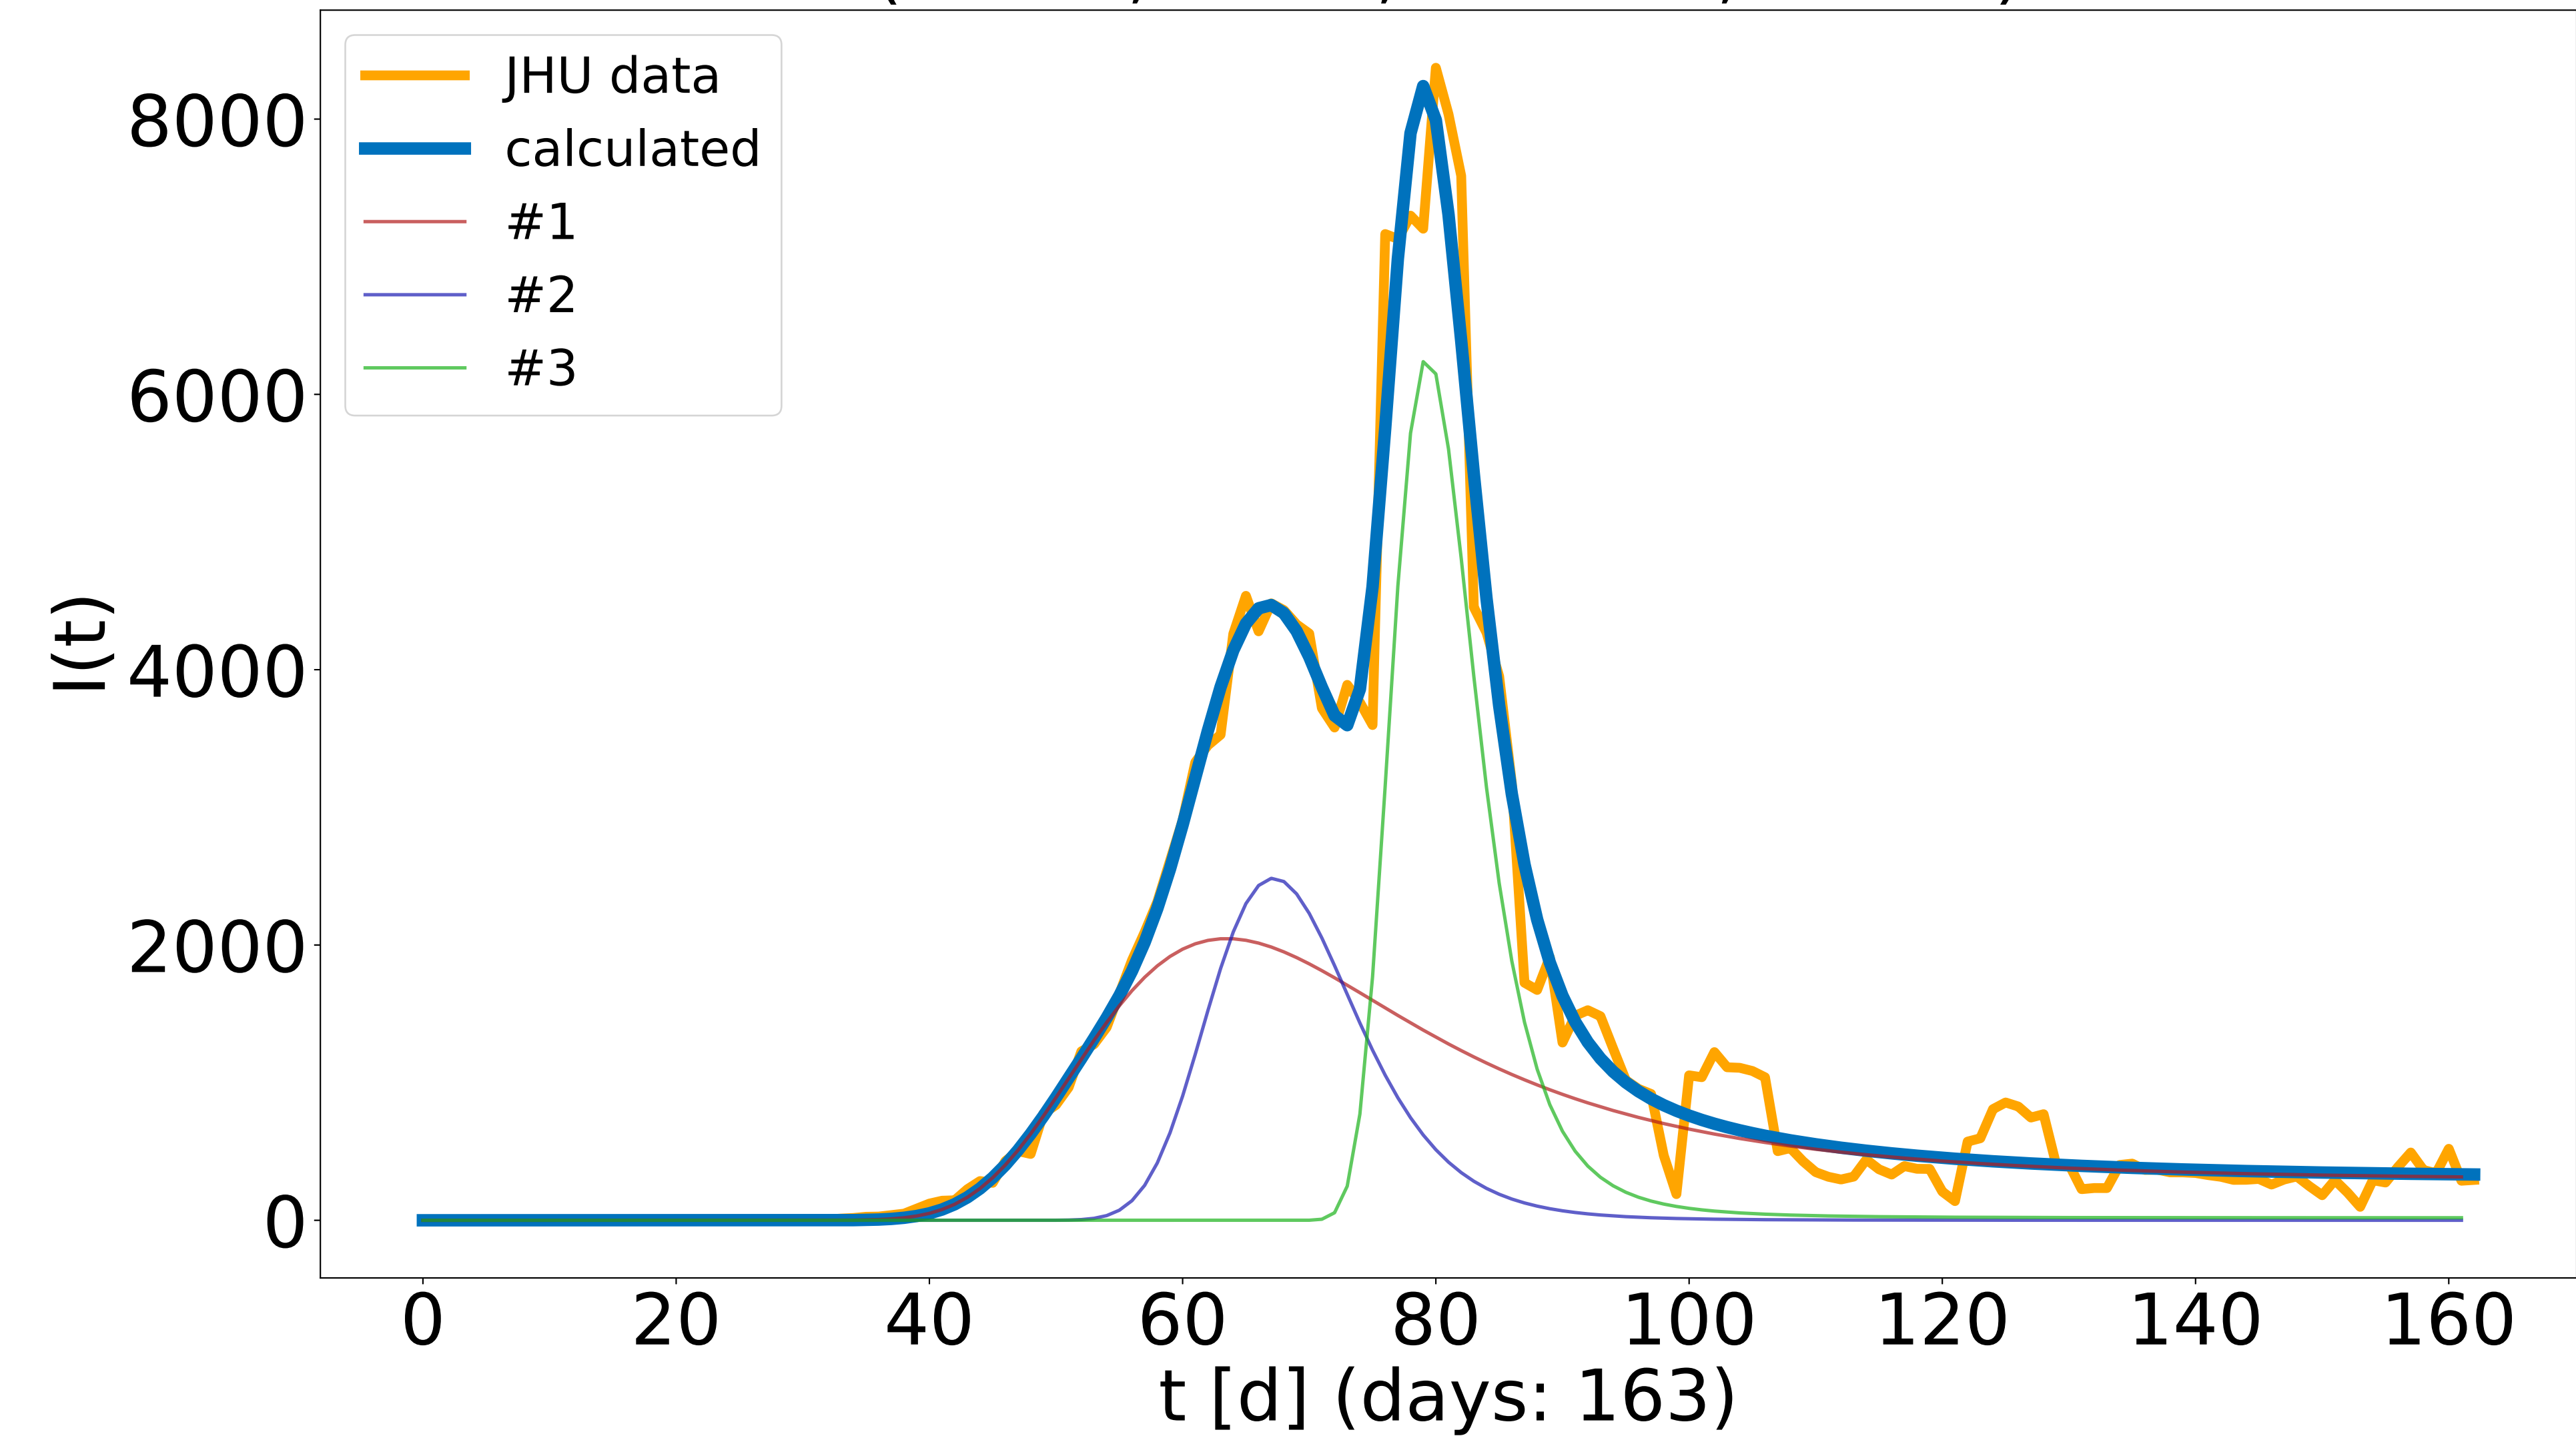



Iceland ( $R^2 = 0.866$ )  
(i: 0.1, a: 0.925, b: 0.052, t: 5.8)  
(i: 0.5, a: 2.0, b: 0.175, t: 29.1)  
(i: 2.6, a: 1.975, b: 1.4, t: 117.5)

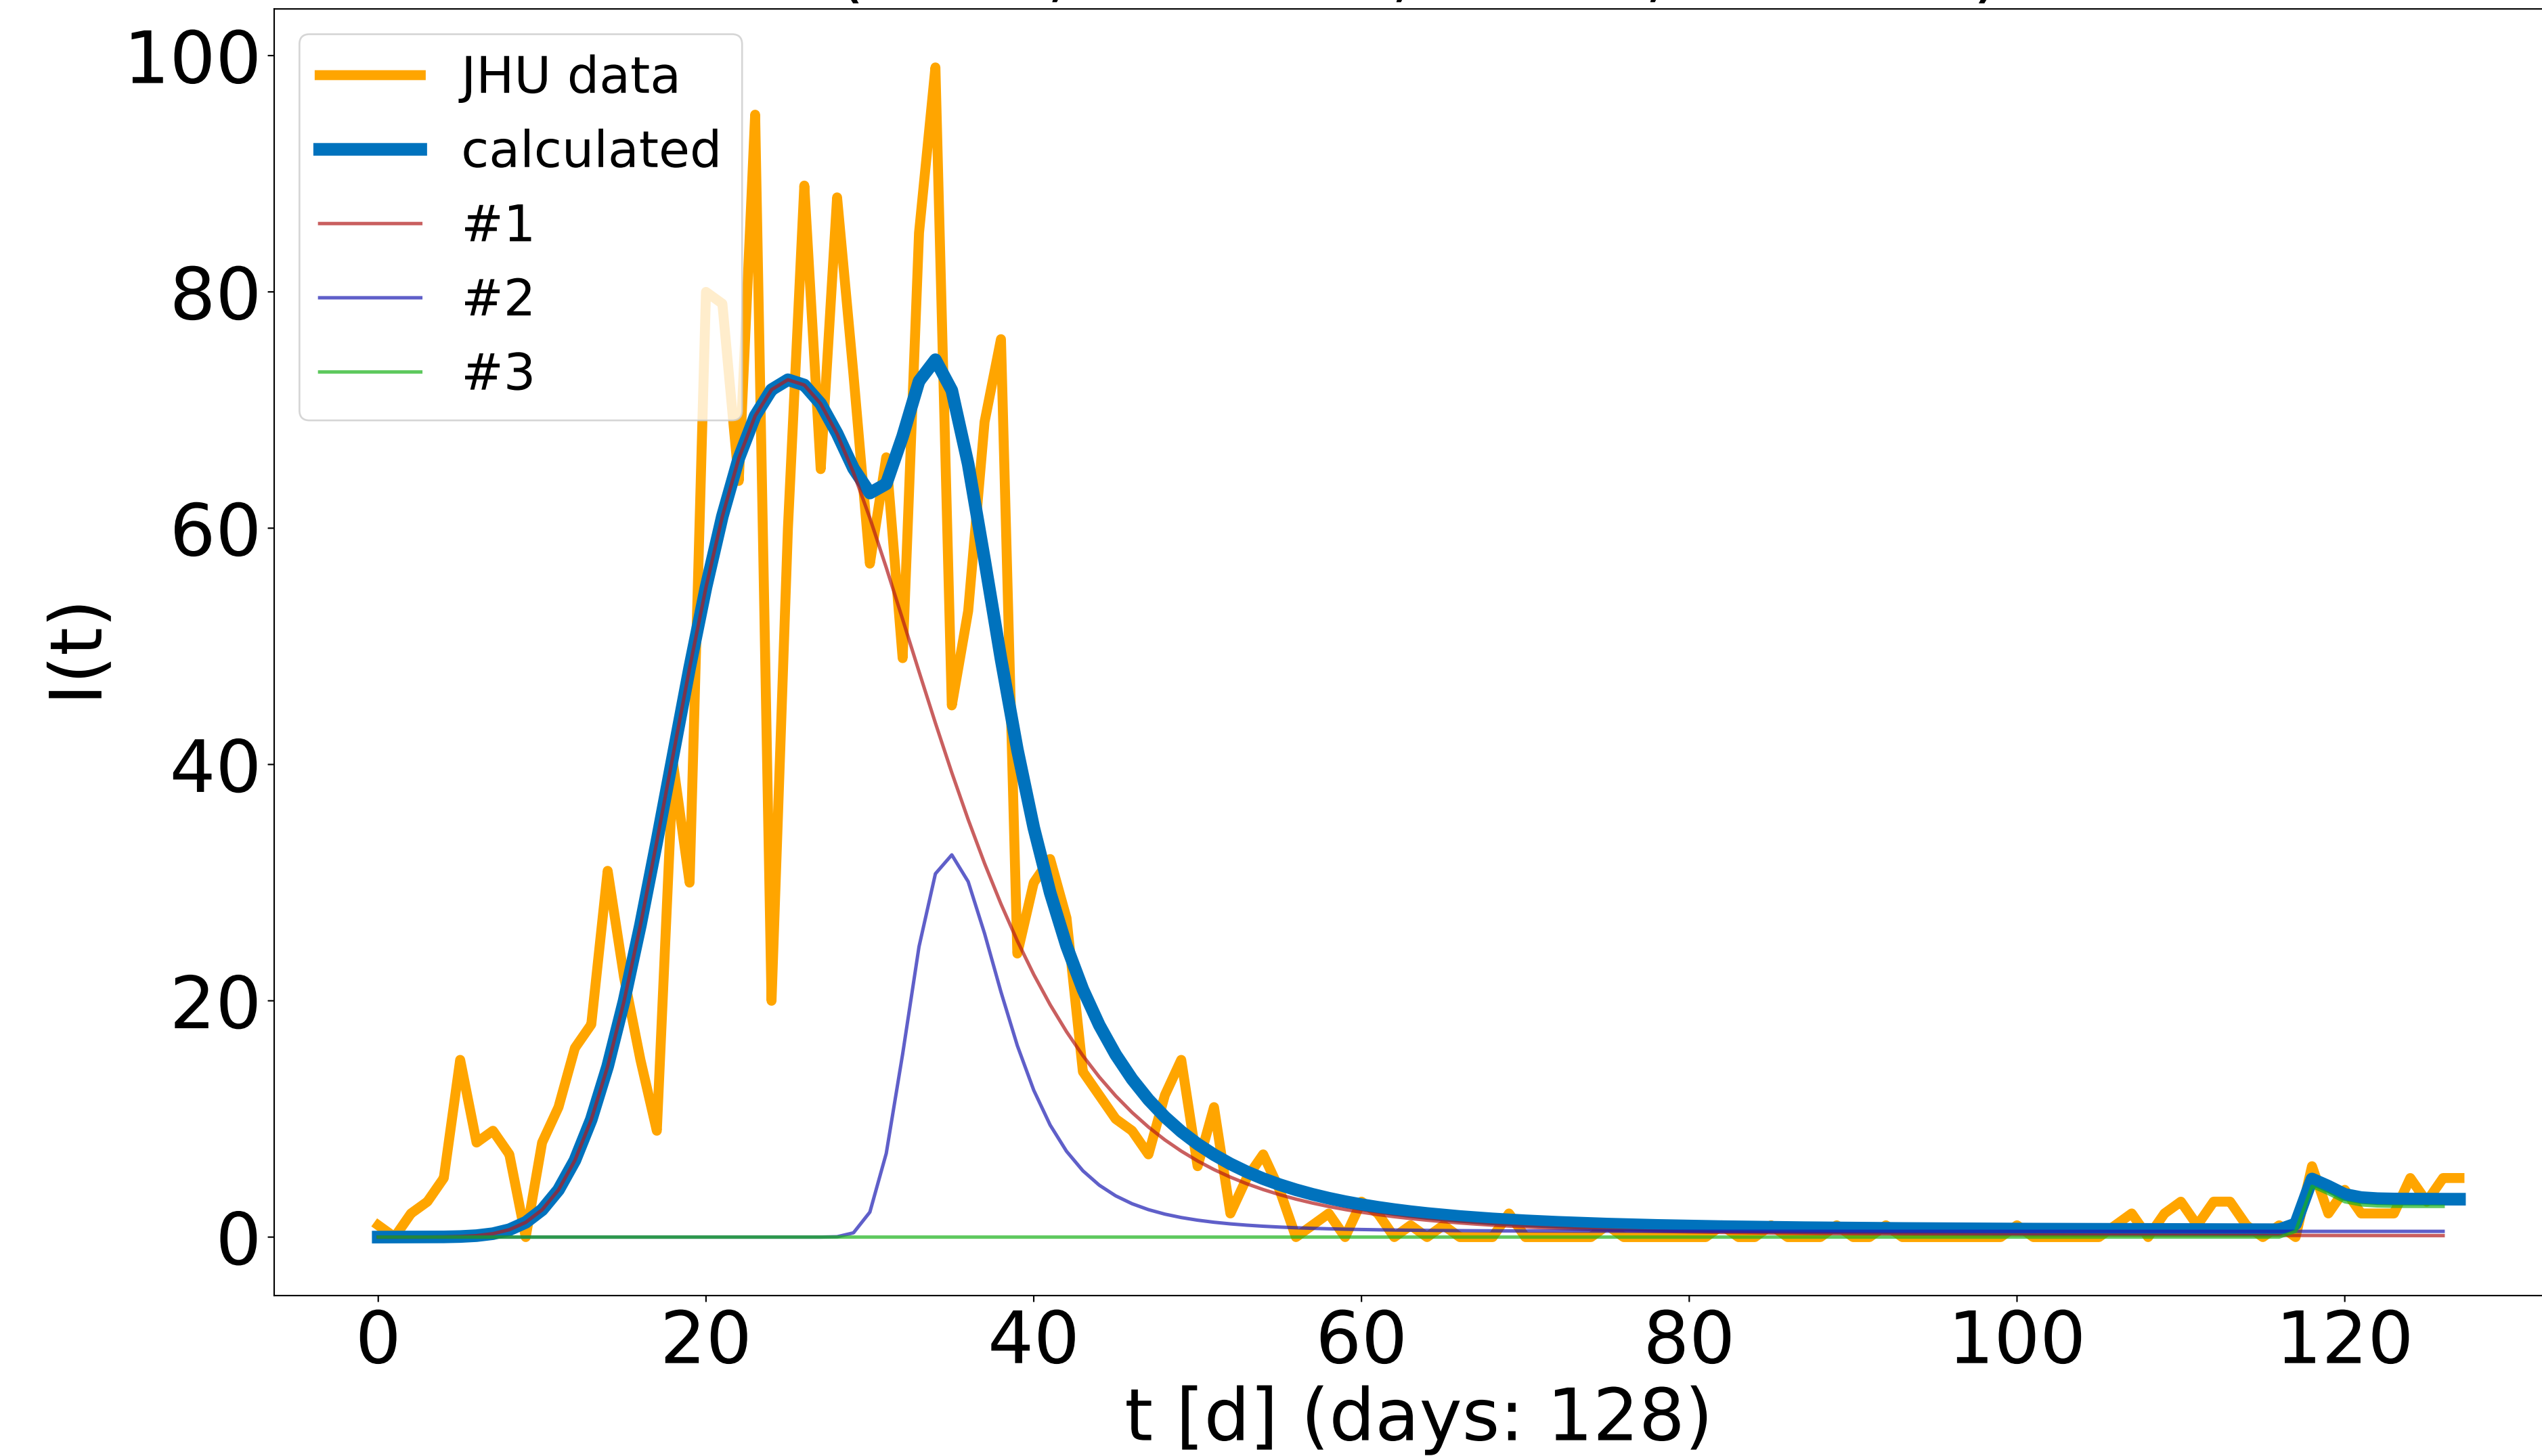

Iceland ( $R^2 = 0.988$ )  
(i: 0.1, a: 0.876, b: 0.049, t: 4.7)  
(i: 0.1, a: 1.711, b: 0.112, t: 25.5)  
(i: 4.1, a: 0.039, b: 0.039, t: 128.5)

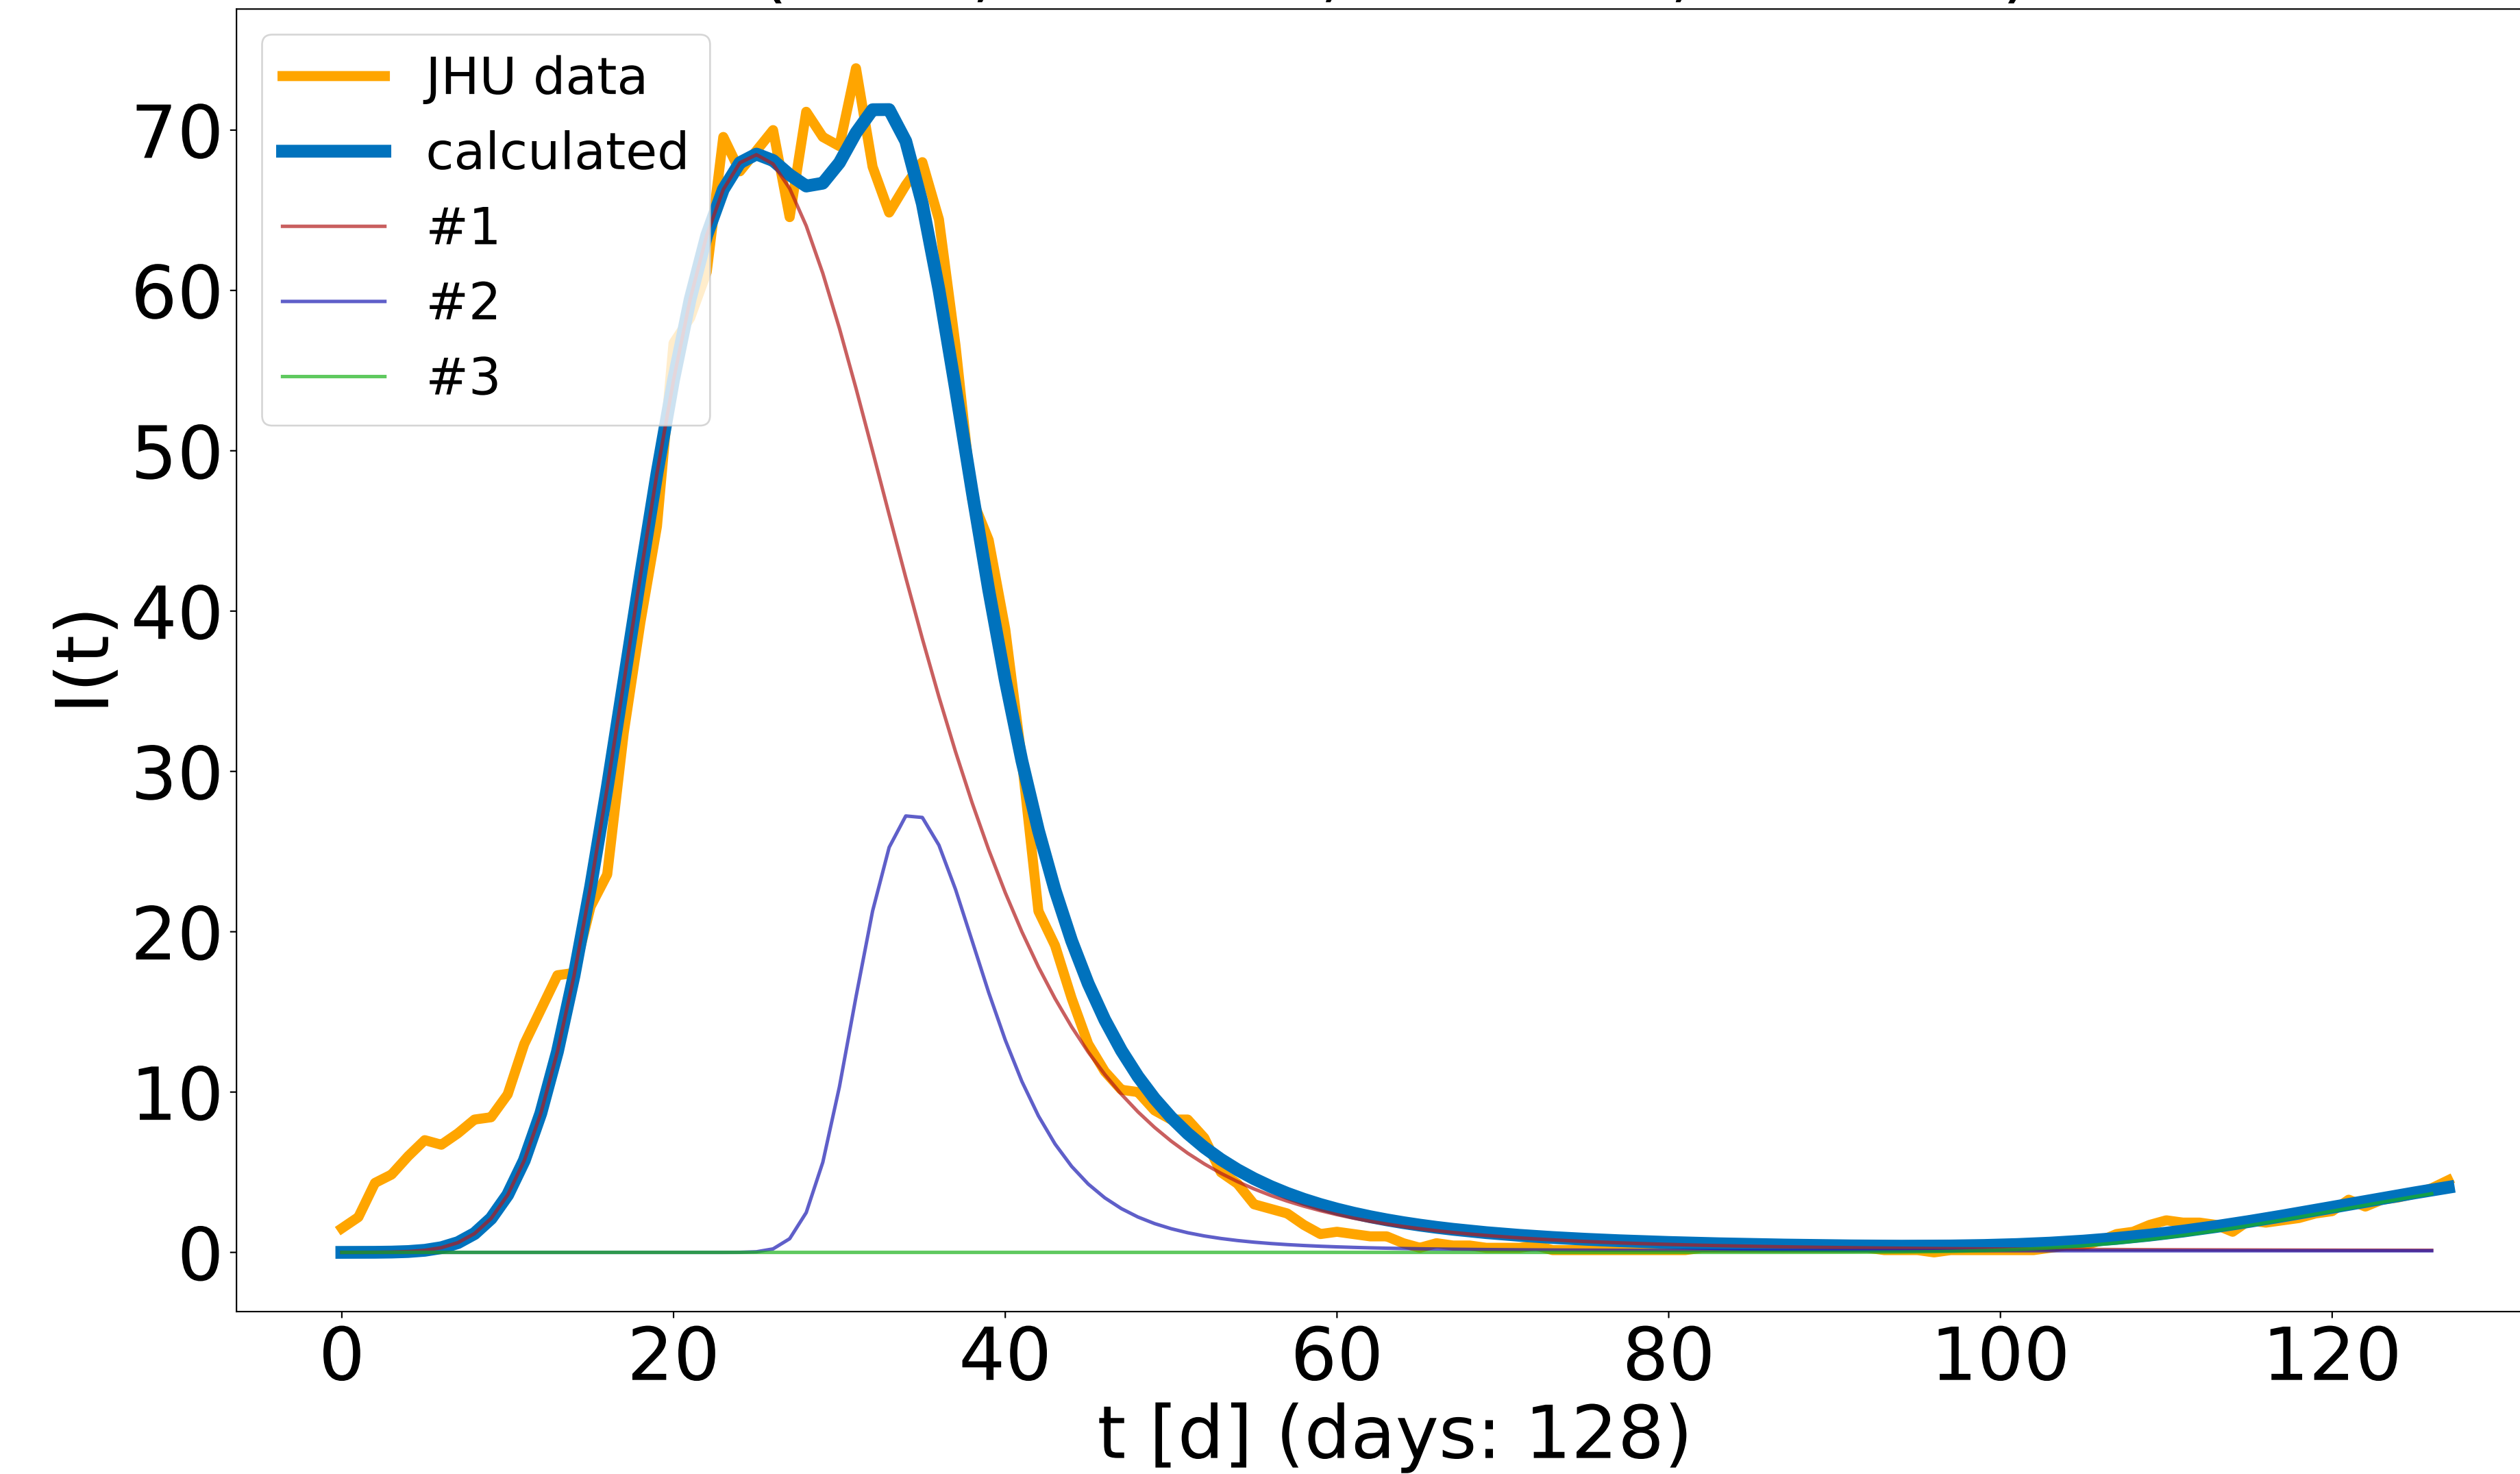

Iran ( $R^2 = 0.937$ )  
(i: 145.8, a: 0.323, b: 0.058, t: 7.3)  
(i: 775.8, a: 0.486, b: 0.157, t: 33.9)  
(i: 1550.7, a: 0.006, b: 0.086, t: 104.7)

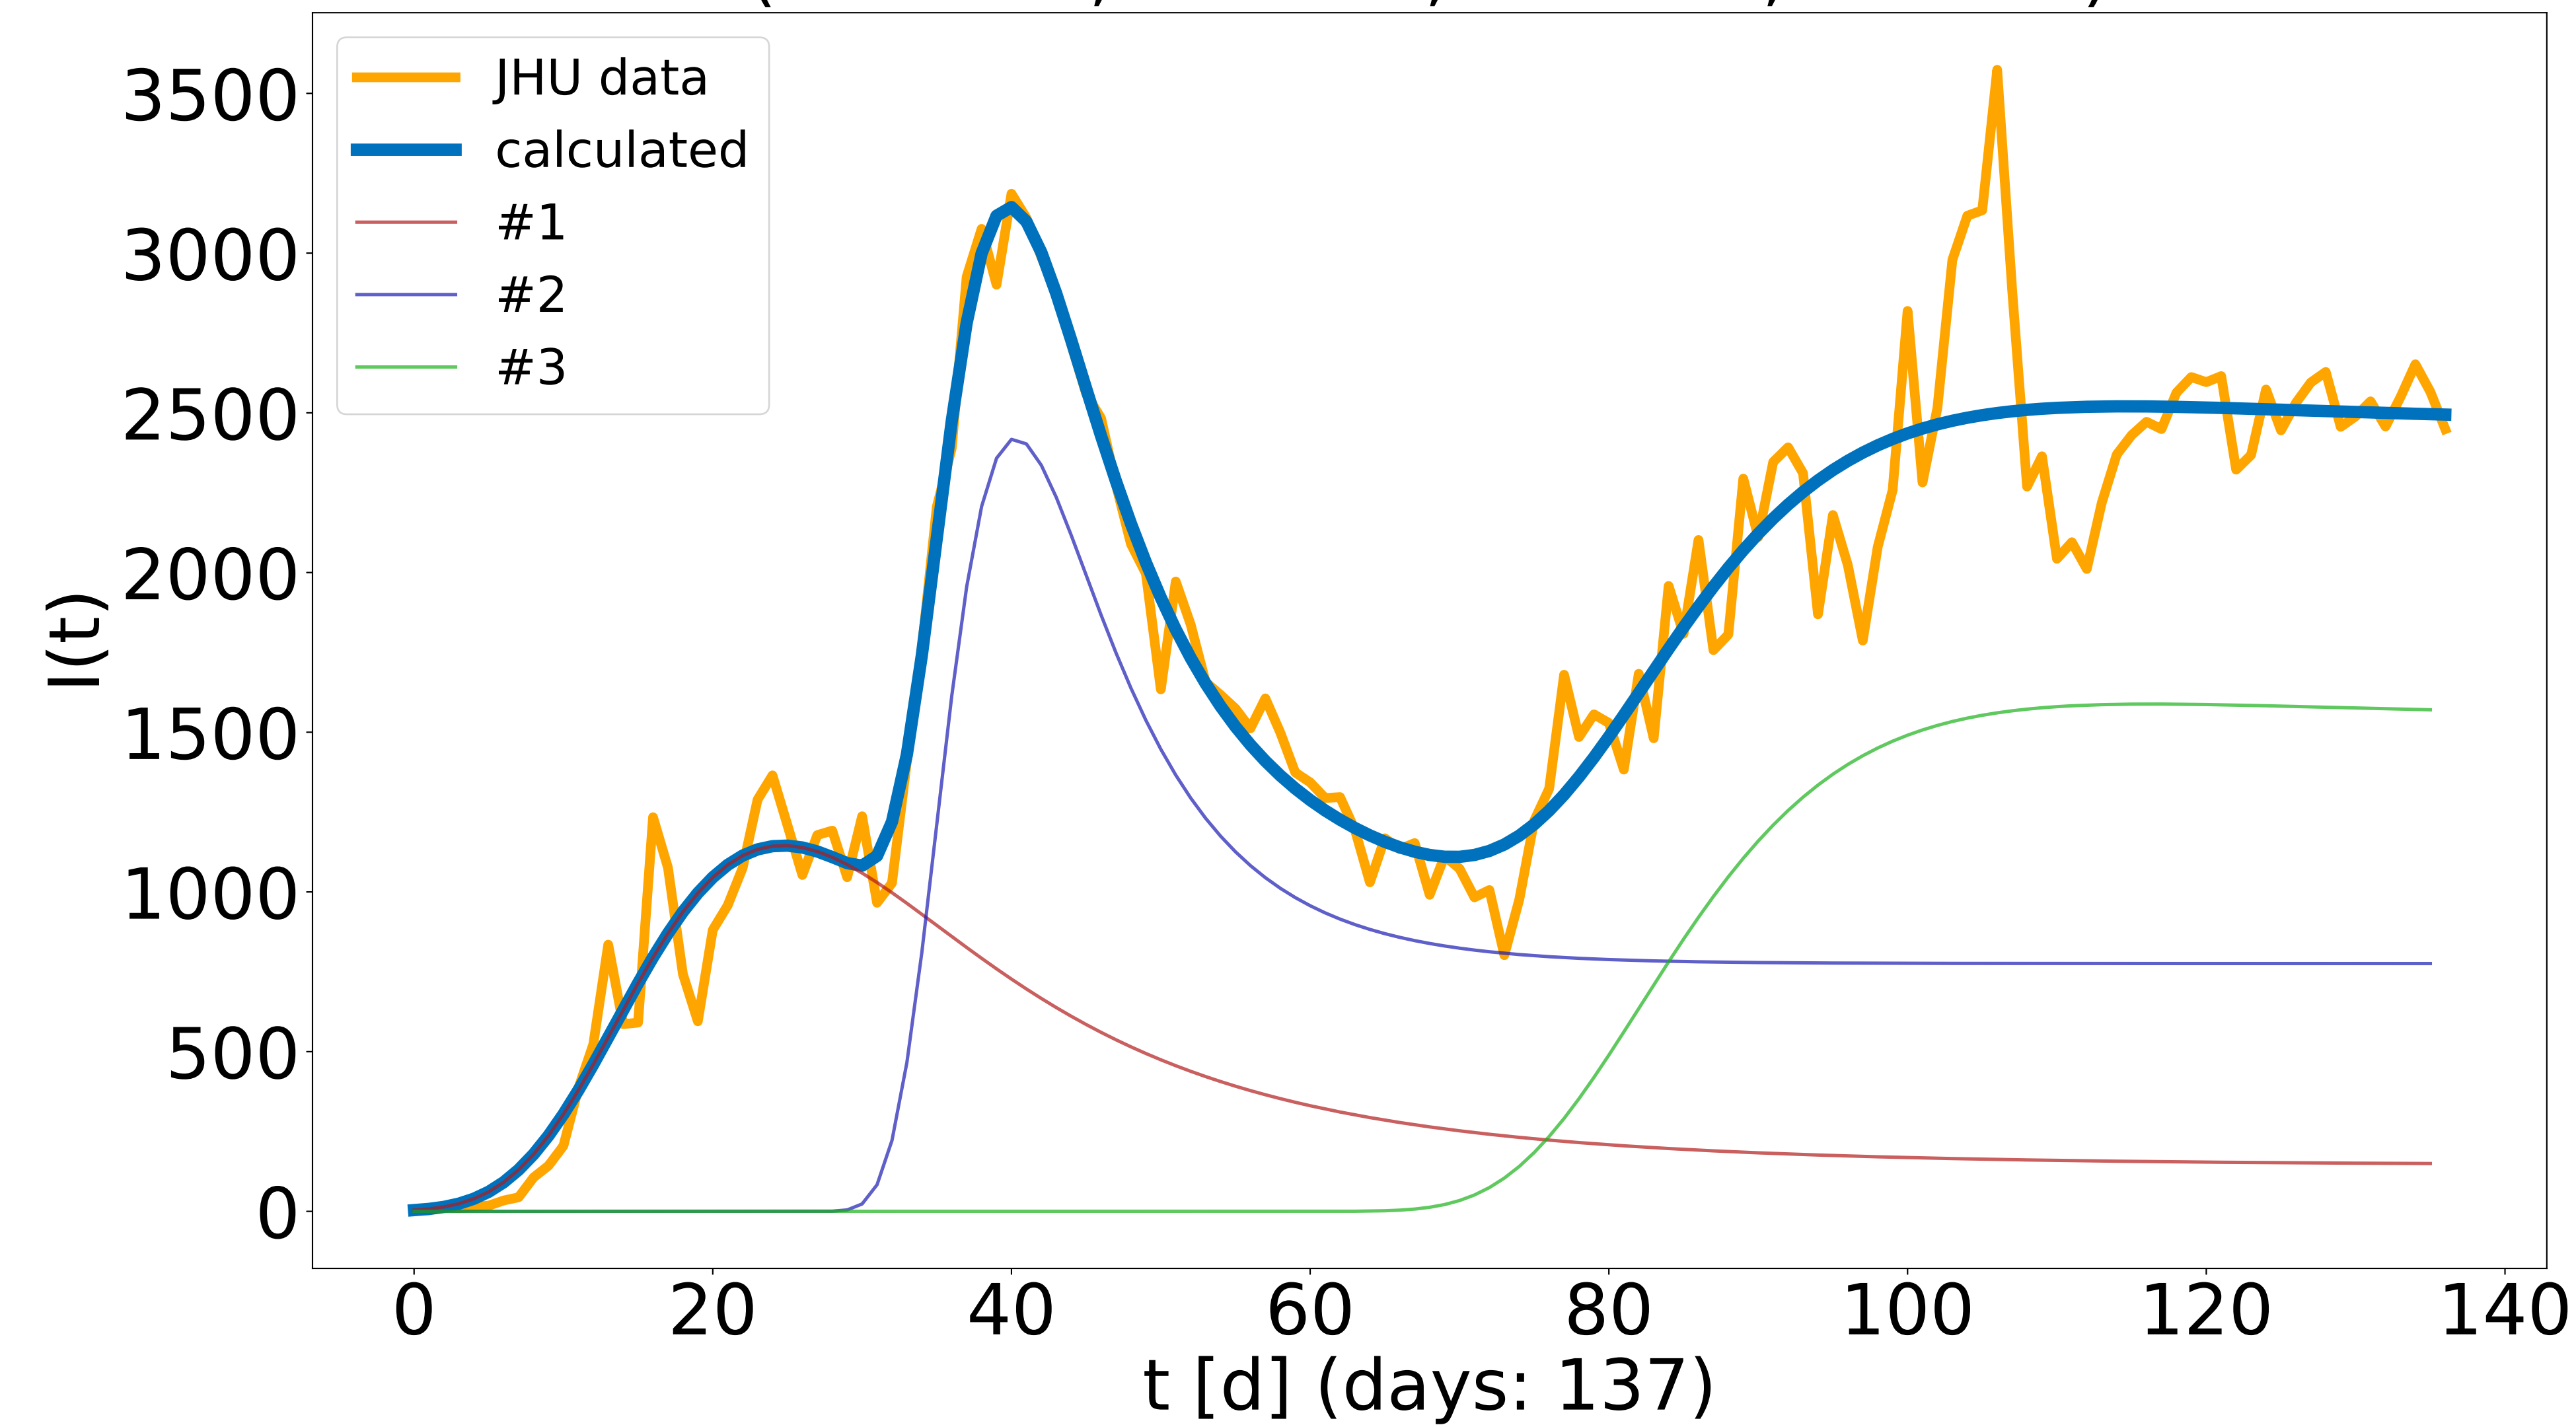

Iran ( $R^2 = 0.98$ )  
(i: 372.6, a: 0.201, b: 0.066, t: 10.8)  
(i: 495.3, a: 0.509, b: 0.129, t: 32.9)  
(i: 1600.3, a: 0.006, b: 0.082, t: 104.4)

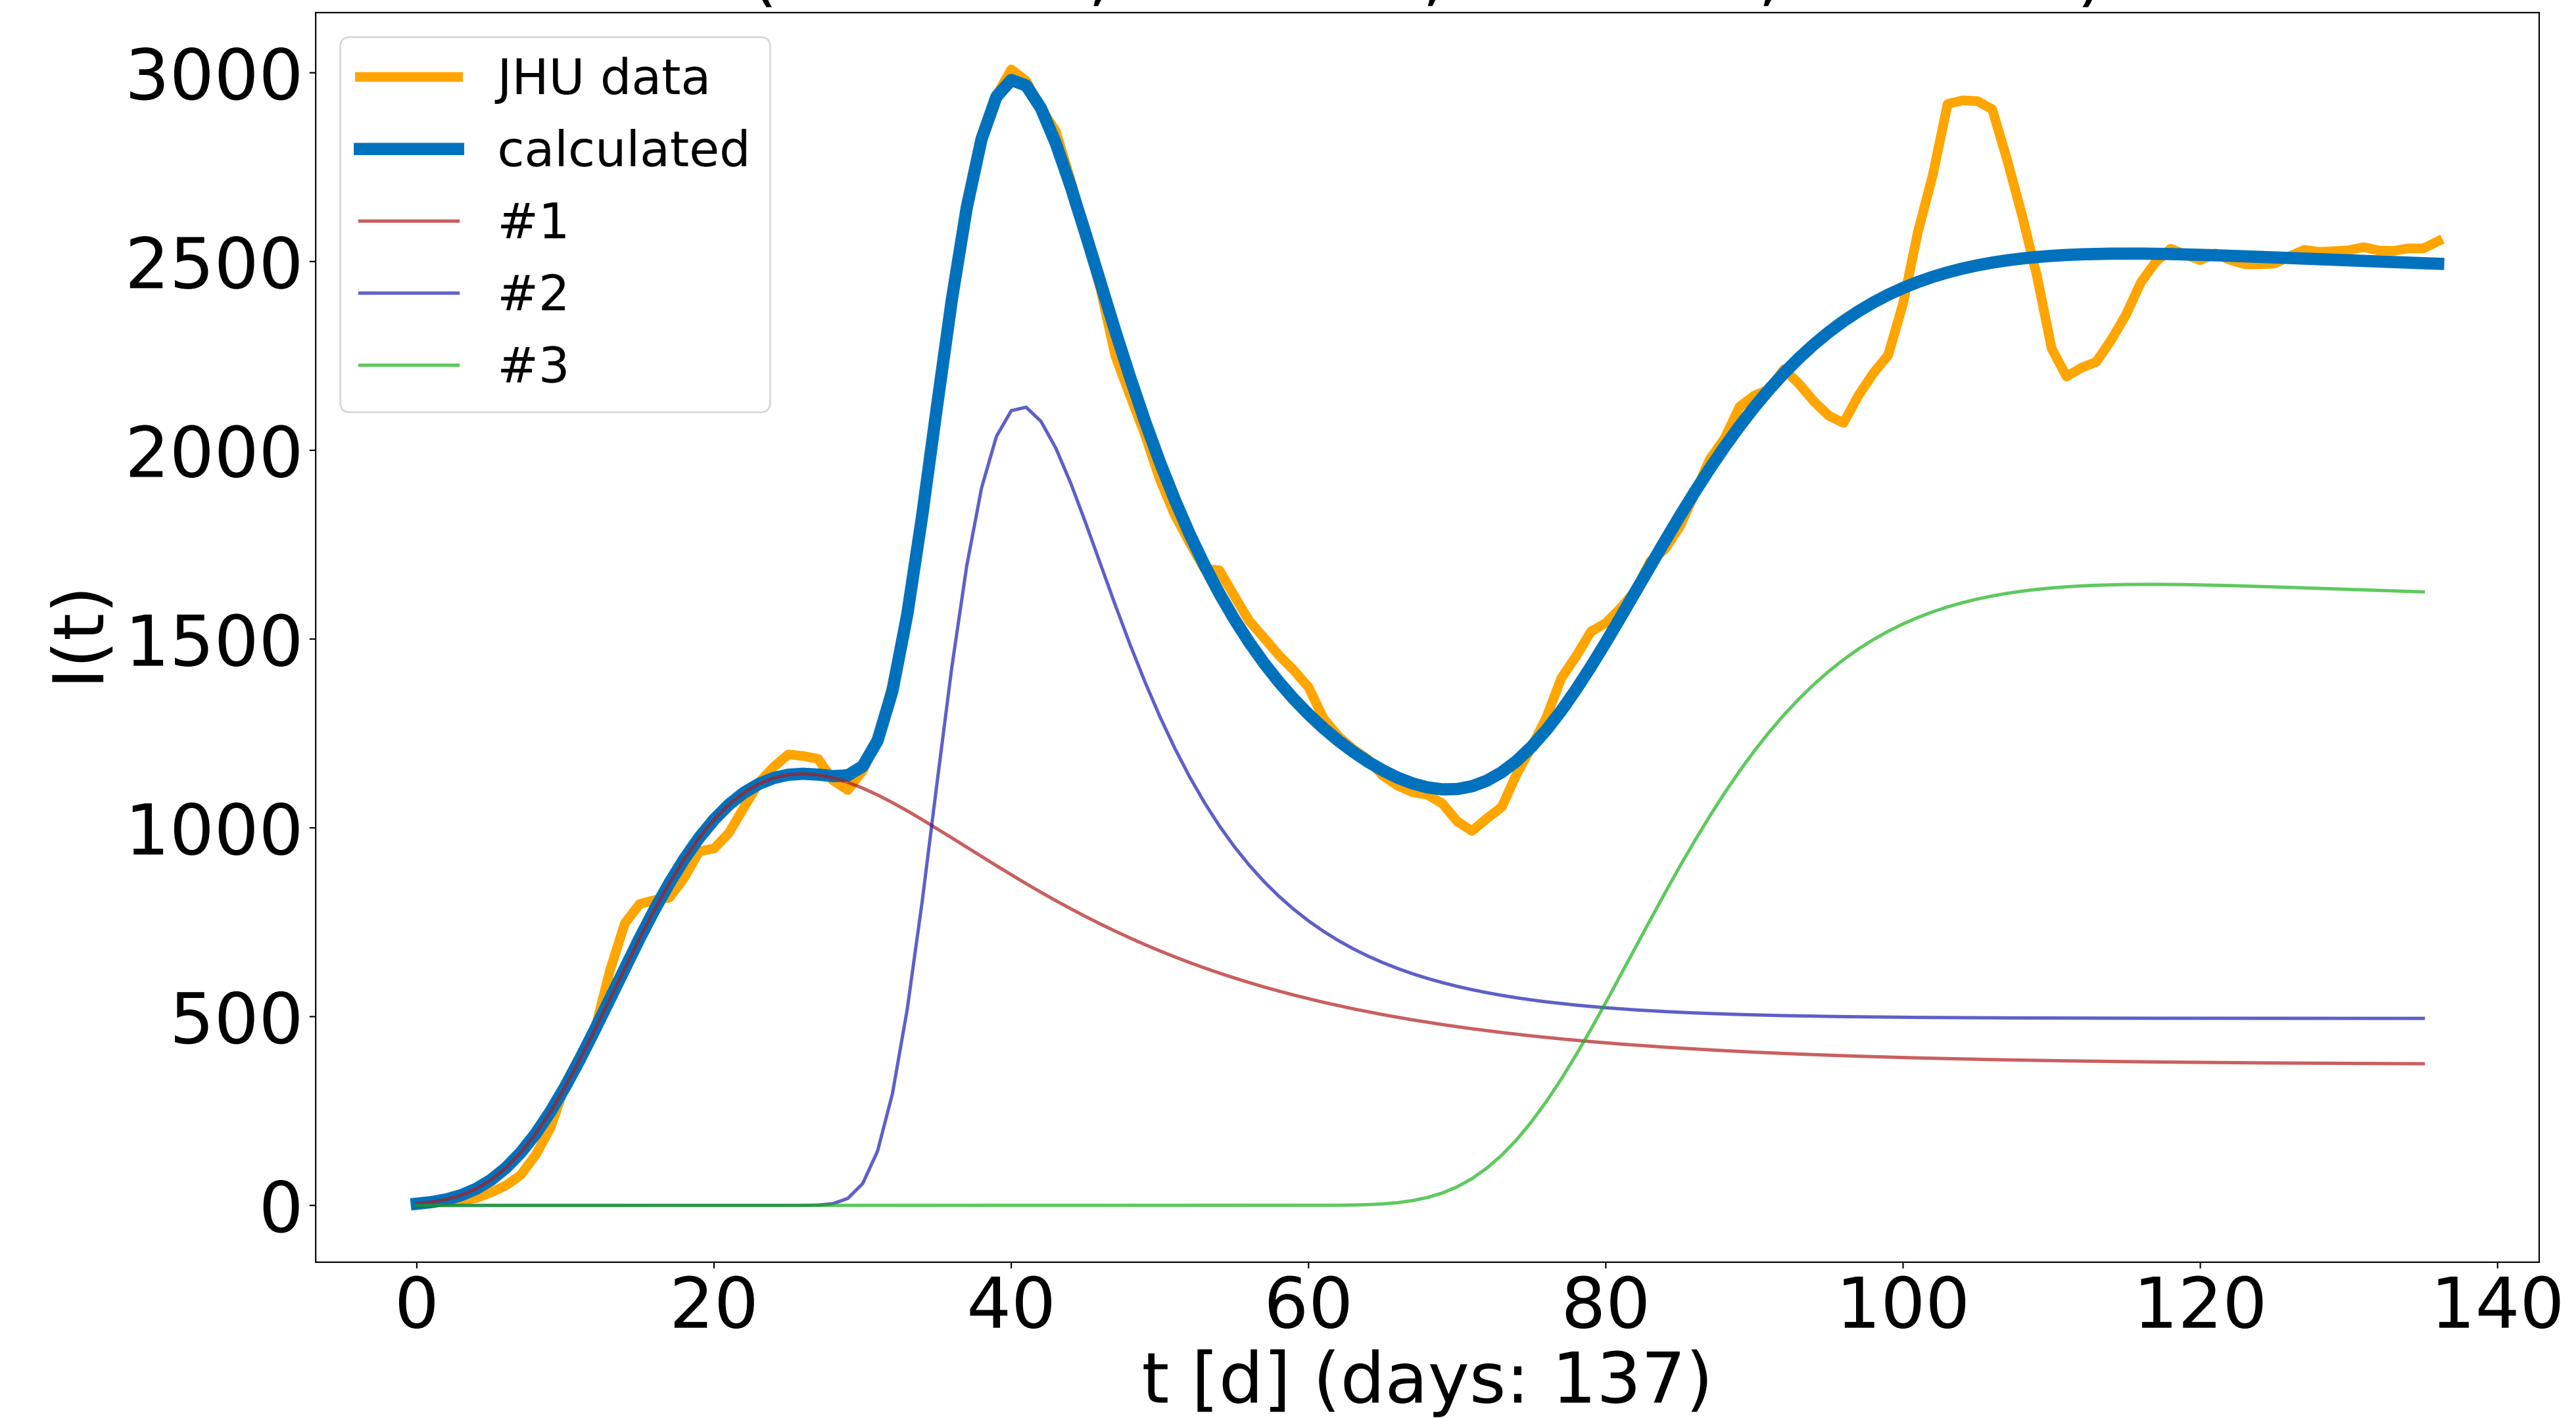

Ireland ( $R^2 = 0.85$ )  
(i: 0.1, a: 0.509, b: 0.023, t: 1.0)  
(i: 11.7, a: 1.95, b: 0.19, t: 37.5)  
(i: 1.0, a: 1.694, b: 0.028, t: 134.9)

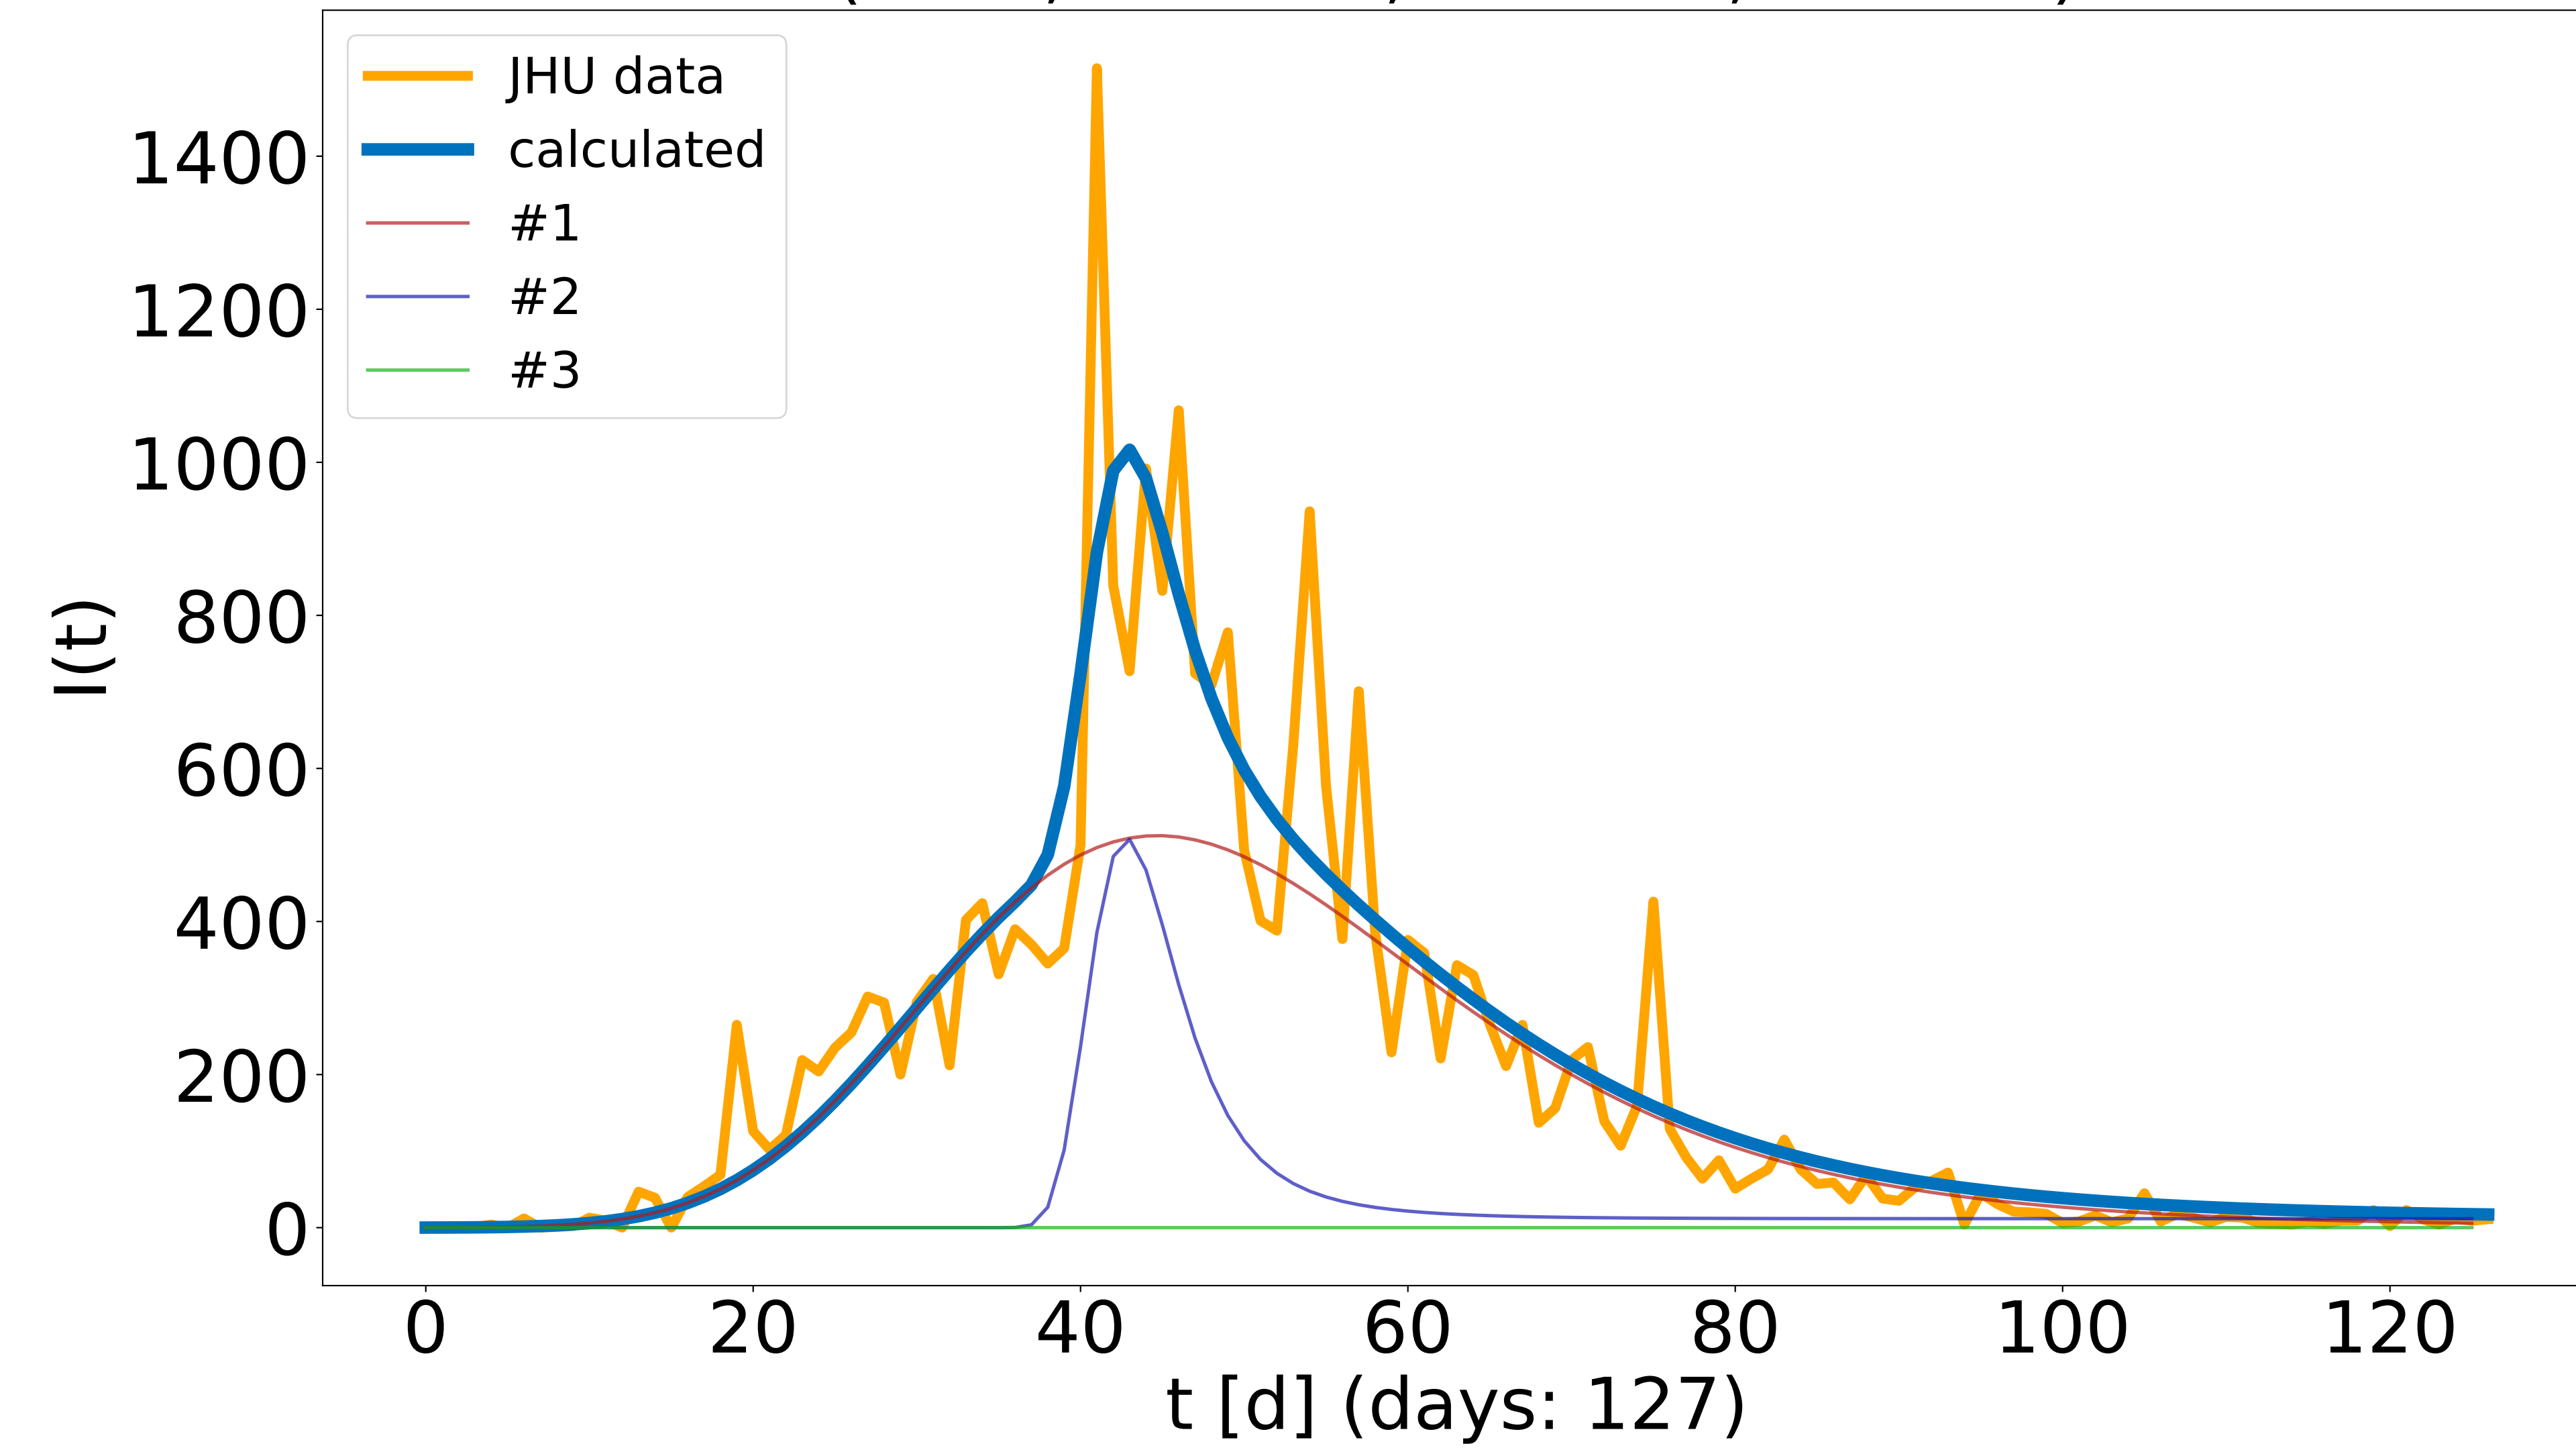

Ireland ( $R^2 = 0.986$ )  
(i: 0.5, a: 0.444, b: 0.024, t: 1.0)  
(i: 6.2, a: 1.242, b: 0.108, t: 34.9)  
(i: 1.2, a: 0.214, b: 1.097, t: 128.1)

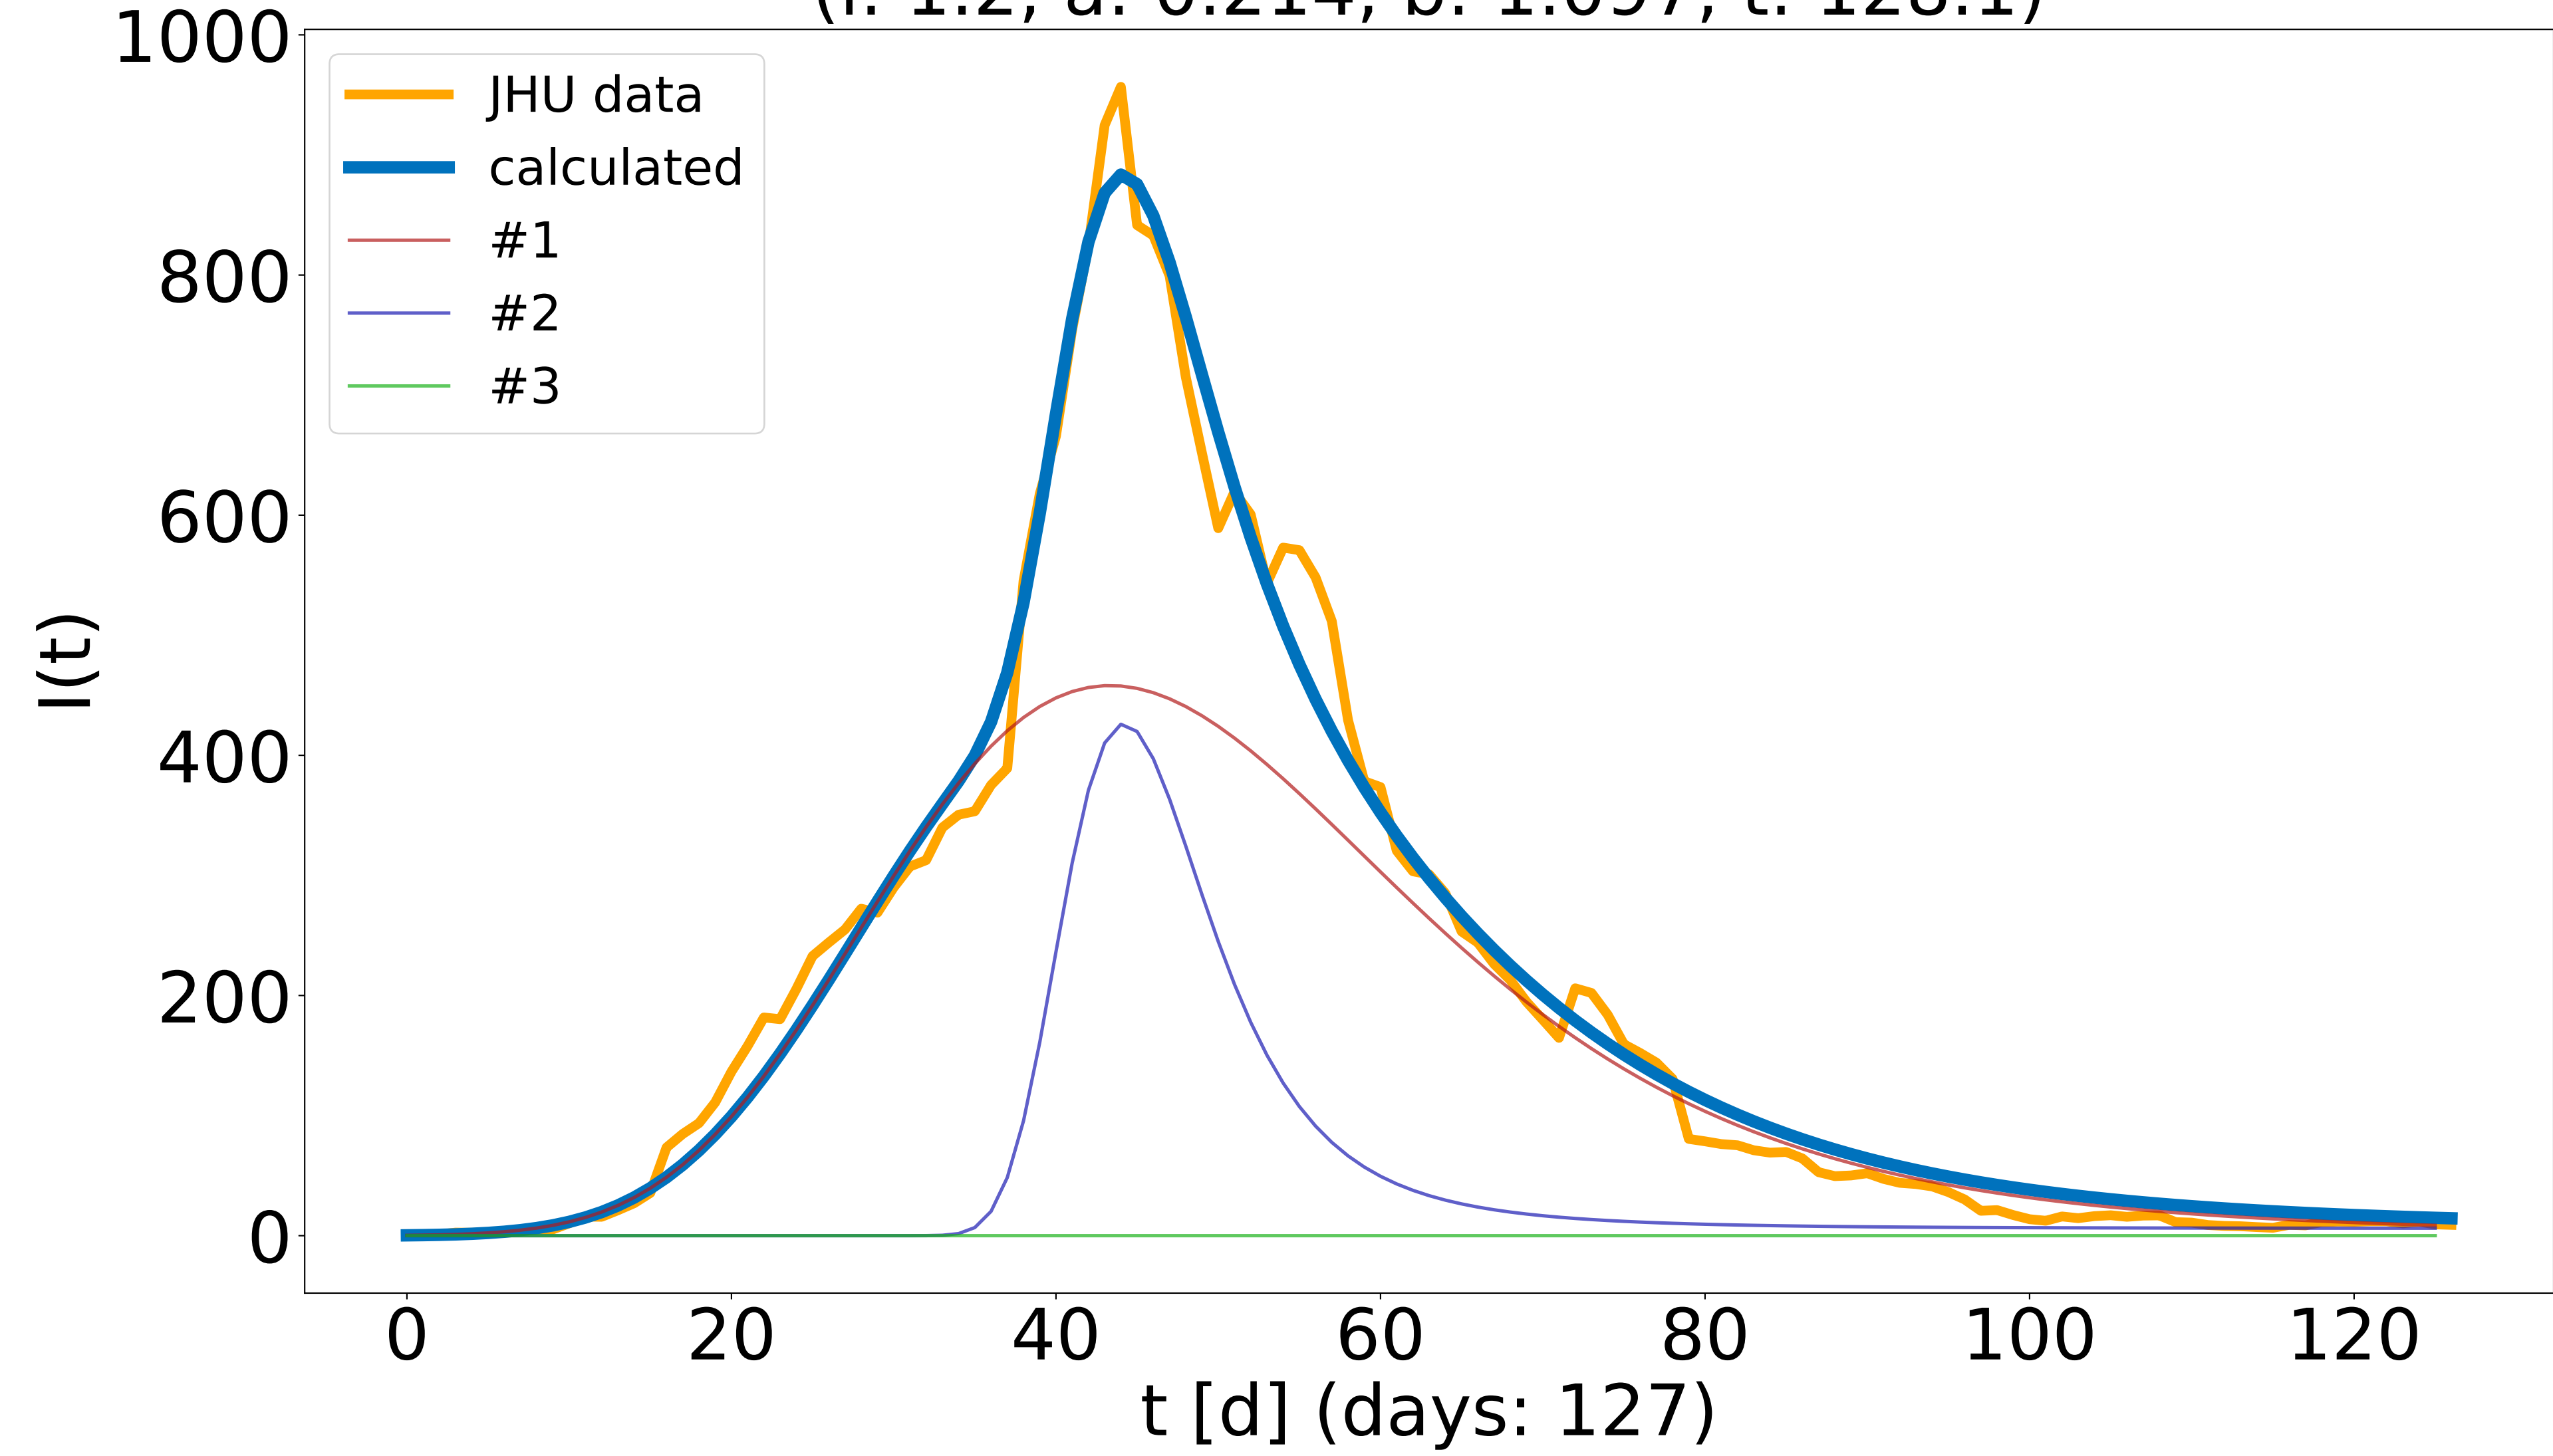

Japan ( $R^2 = 0.646$ )  
(i: 0.1, a: 0.267, b: 0.014, t: 7.5)  
(i: 0.1, a: 0.967, b: 0.042, t: 58.2)  
(i: 8.2, a: 0.118, b: 0.001, t: 134.3)

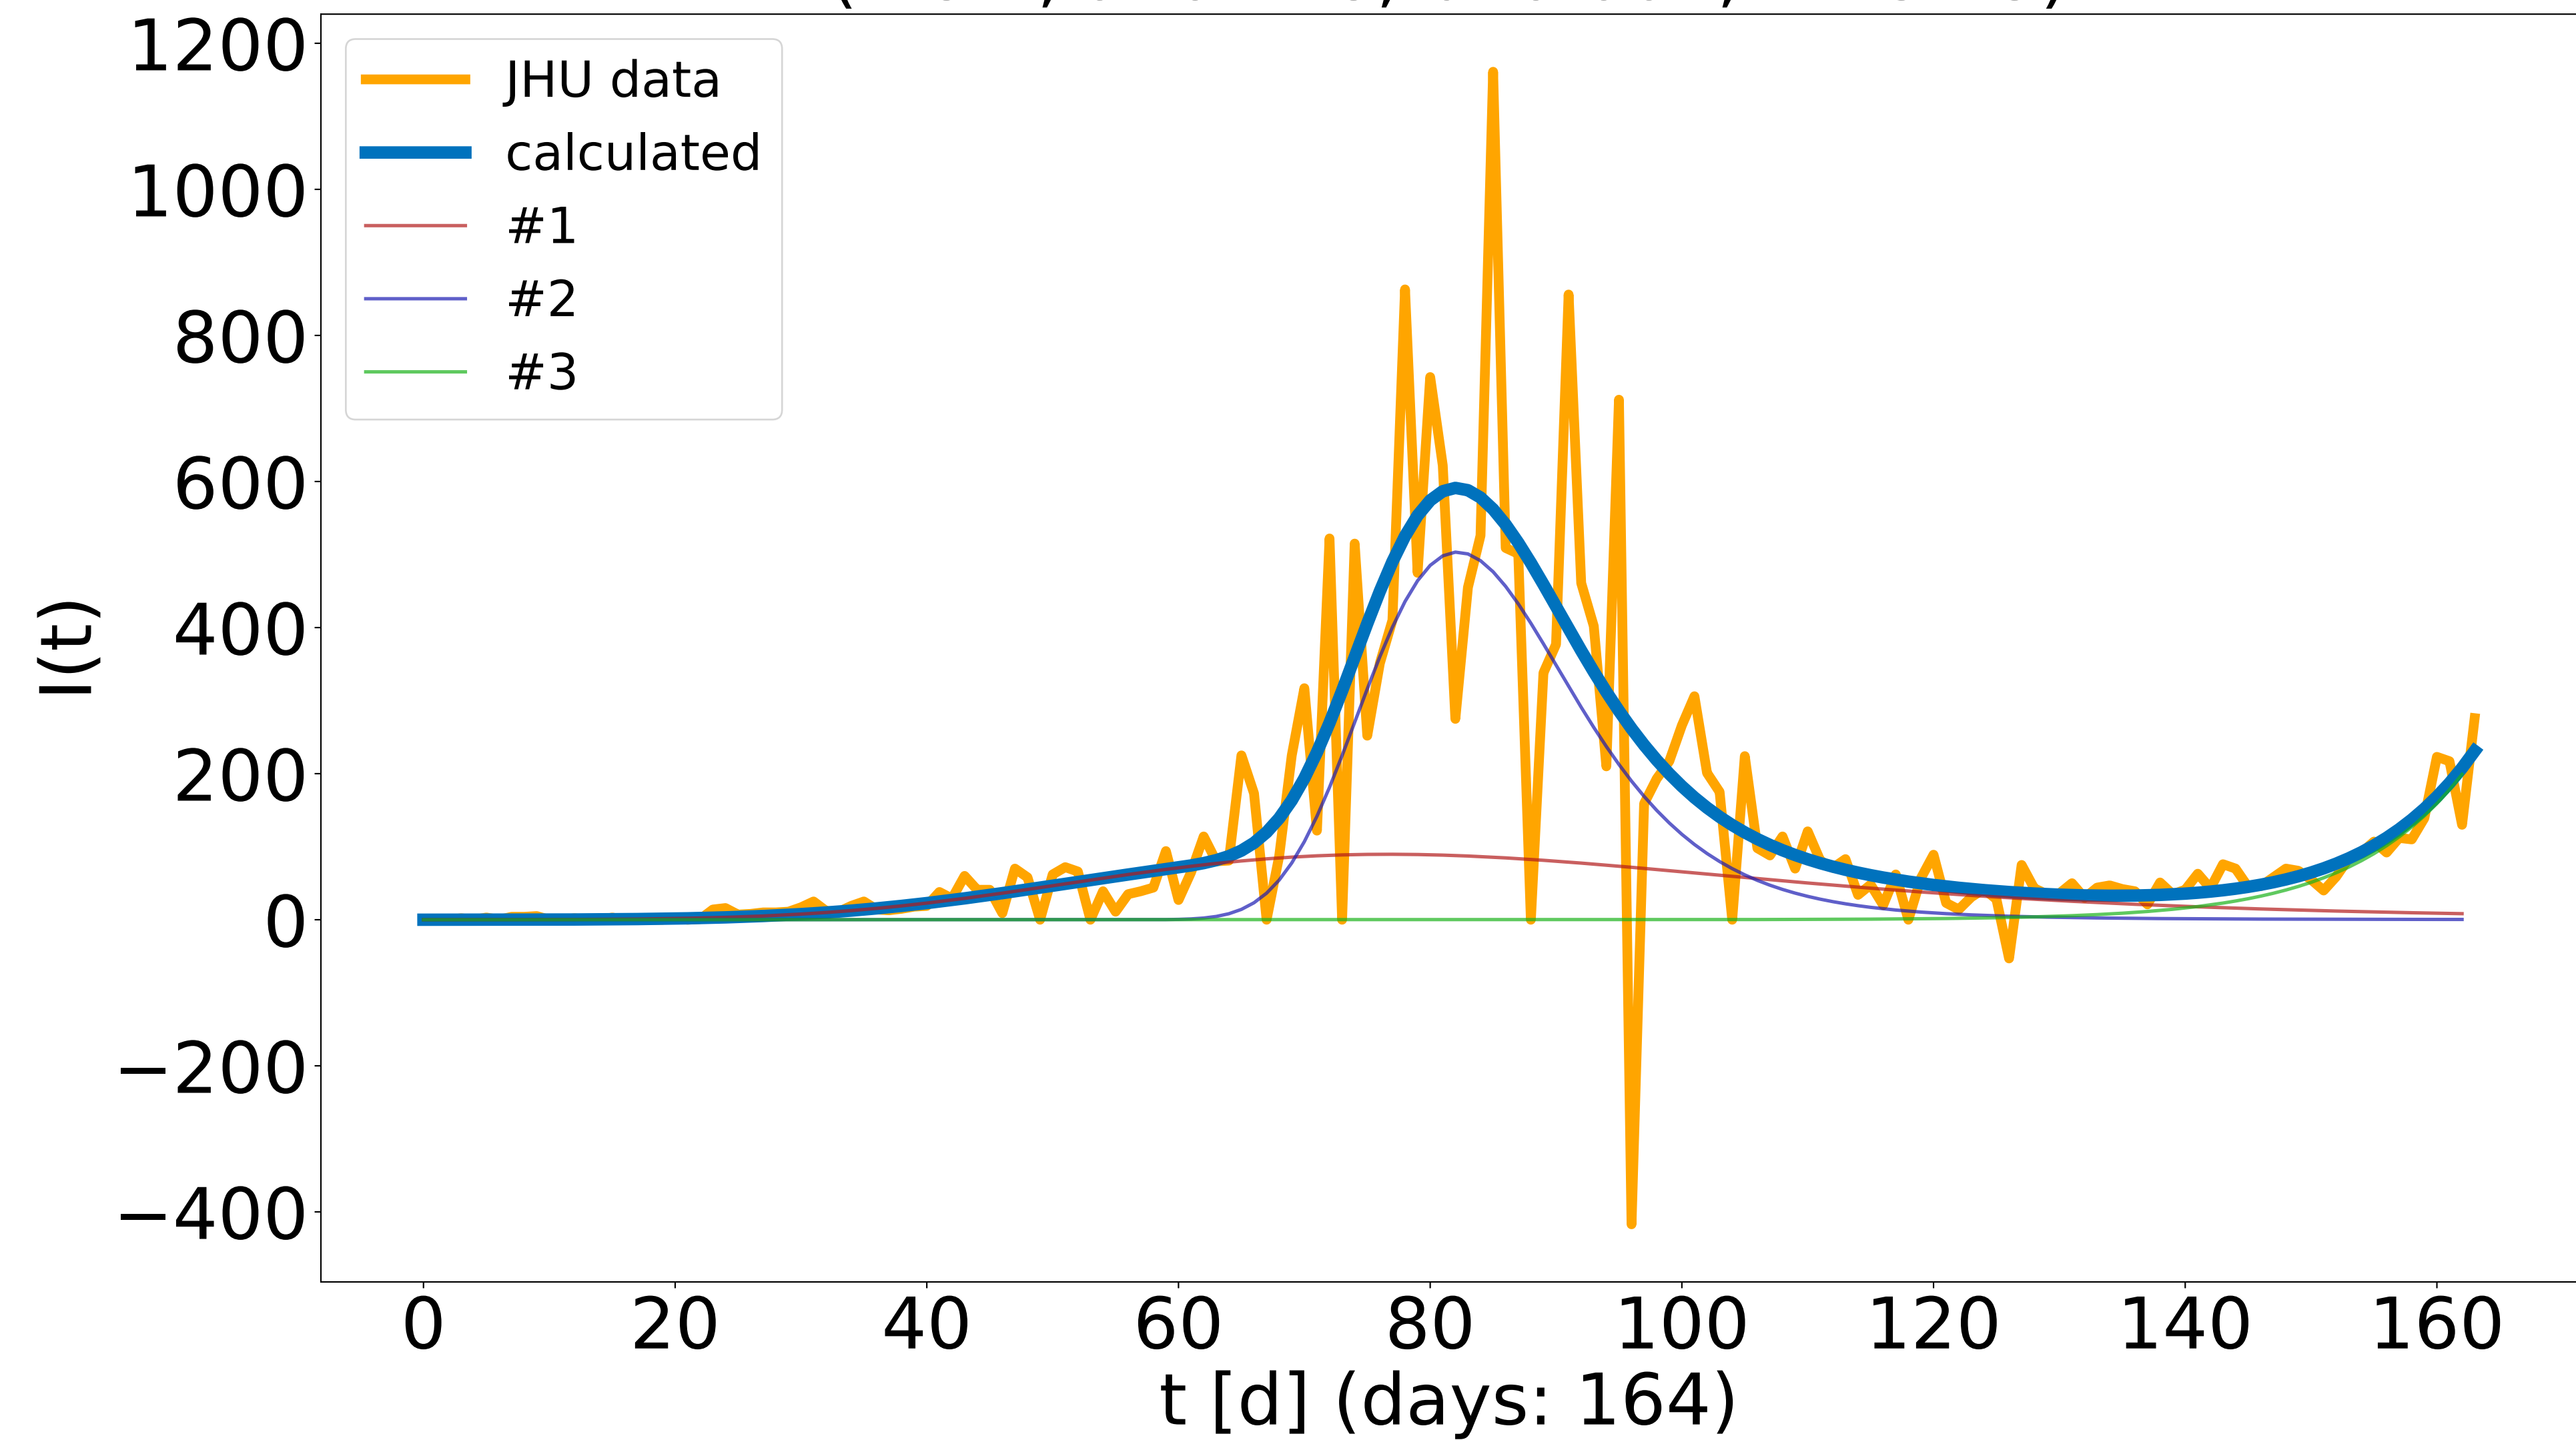

Japan ( $R^2 = 0.984$ )  
(i: 0.1, a: 0.27, b: 0.015, t: 6.9)  
(i: 0.1, a: 0.914, b: 0.04, t: 57.0)  
(i: 21.3, a: 0.101, b: 0.001, t: 140.0)

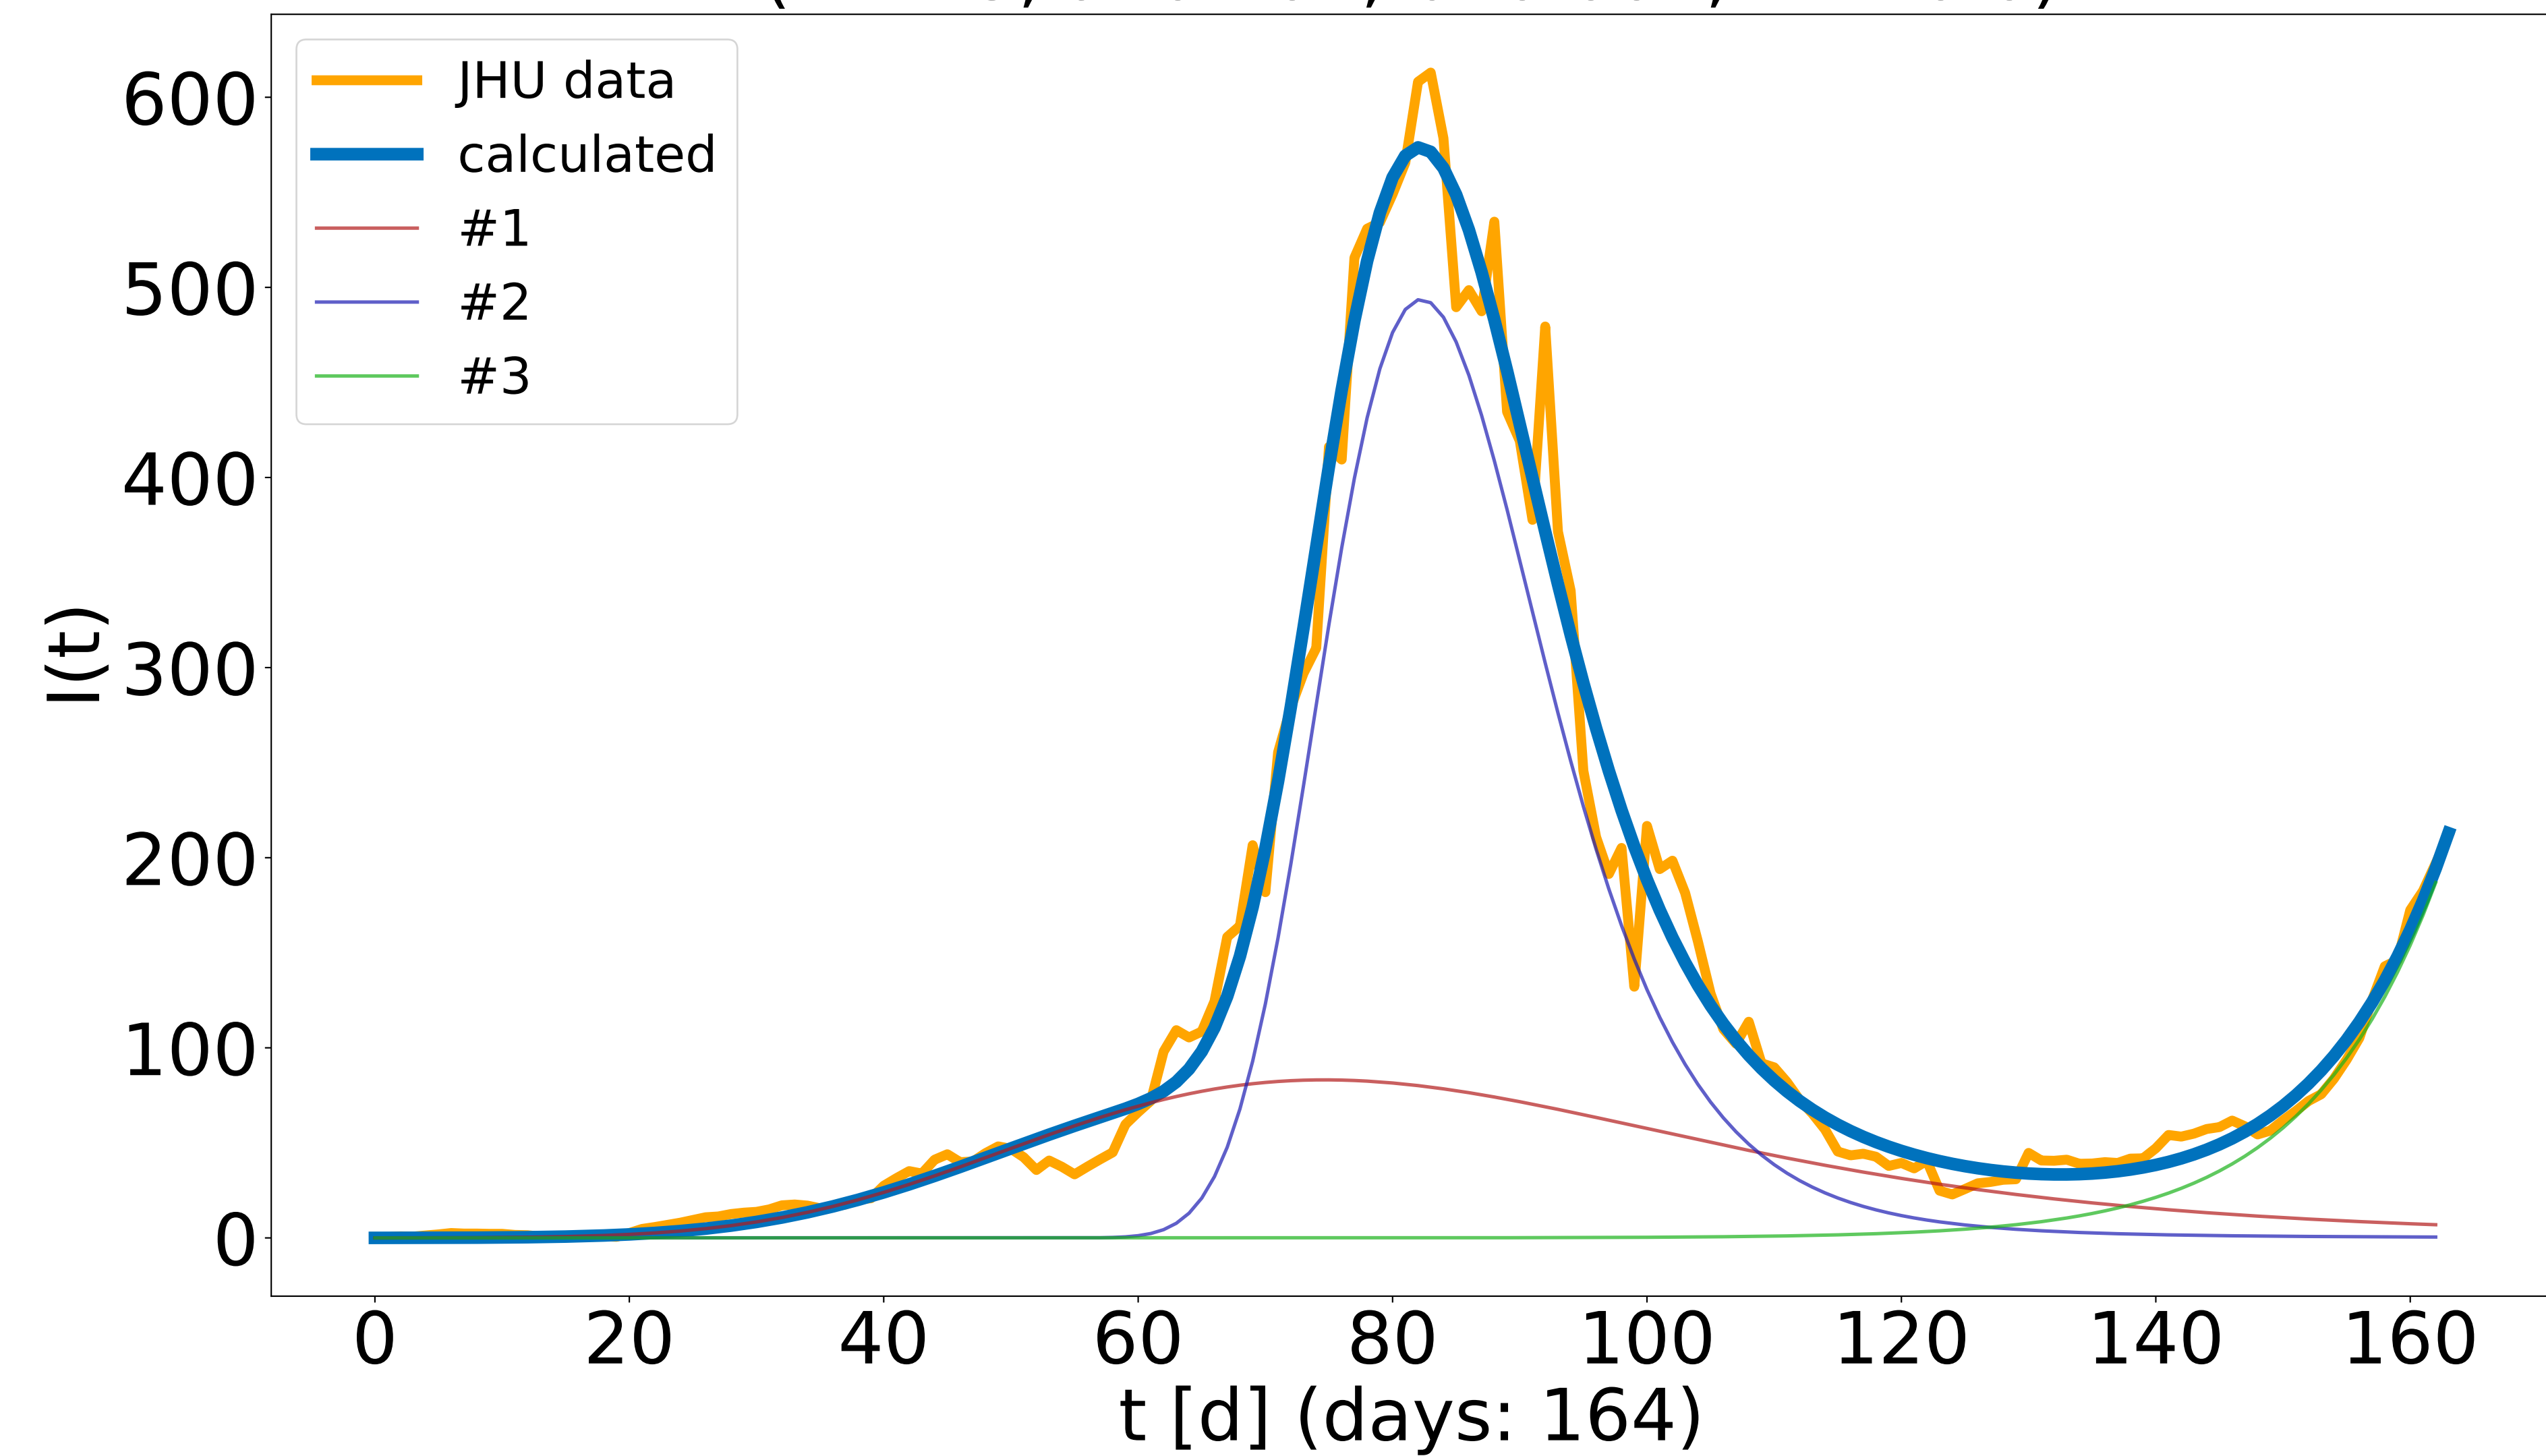



Korea, South ( $R^2 = 0.888$ )  
(i: 29.1, a: 1.148, b: 0.134, t: 30.4)  
(i: 11.9, a: 2.0, b: 0.811, t: 123.9)  
(i: 6.1, a: 1.999, b: 1.4, t: 133.7)

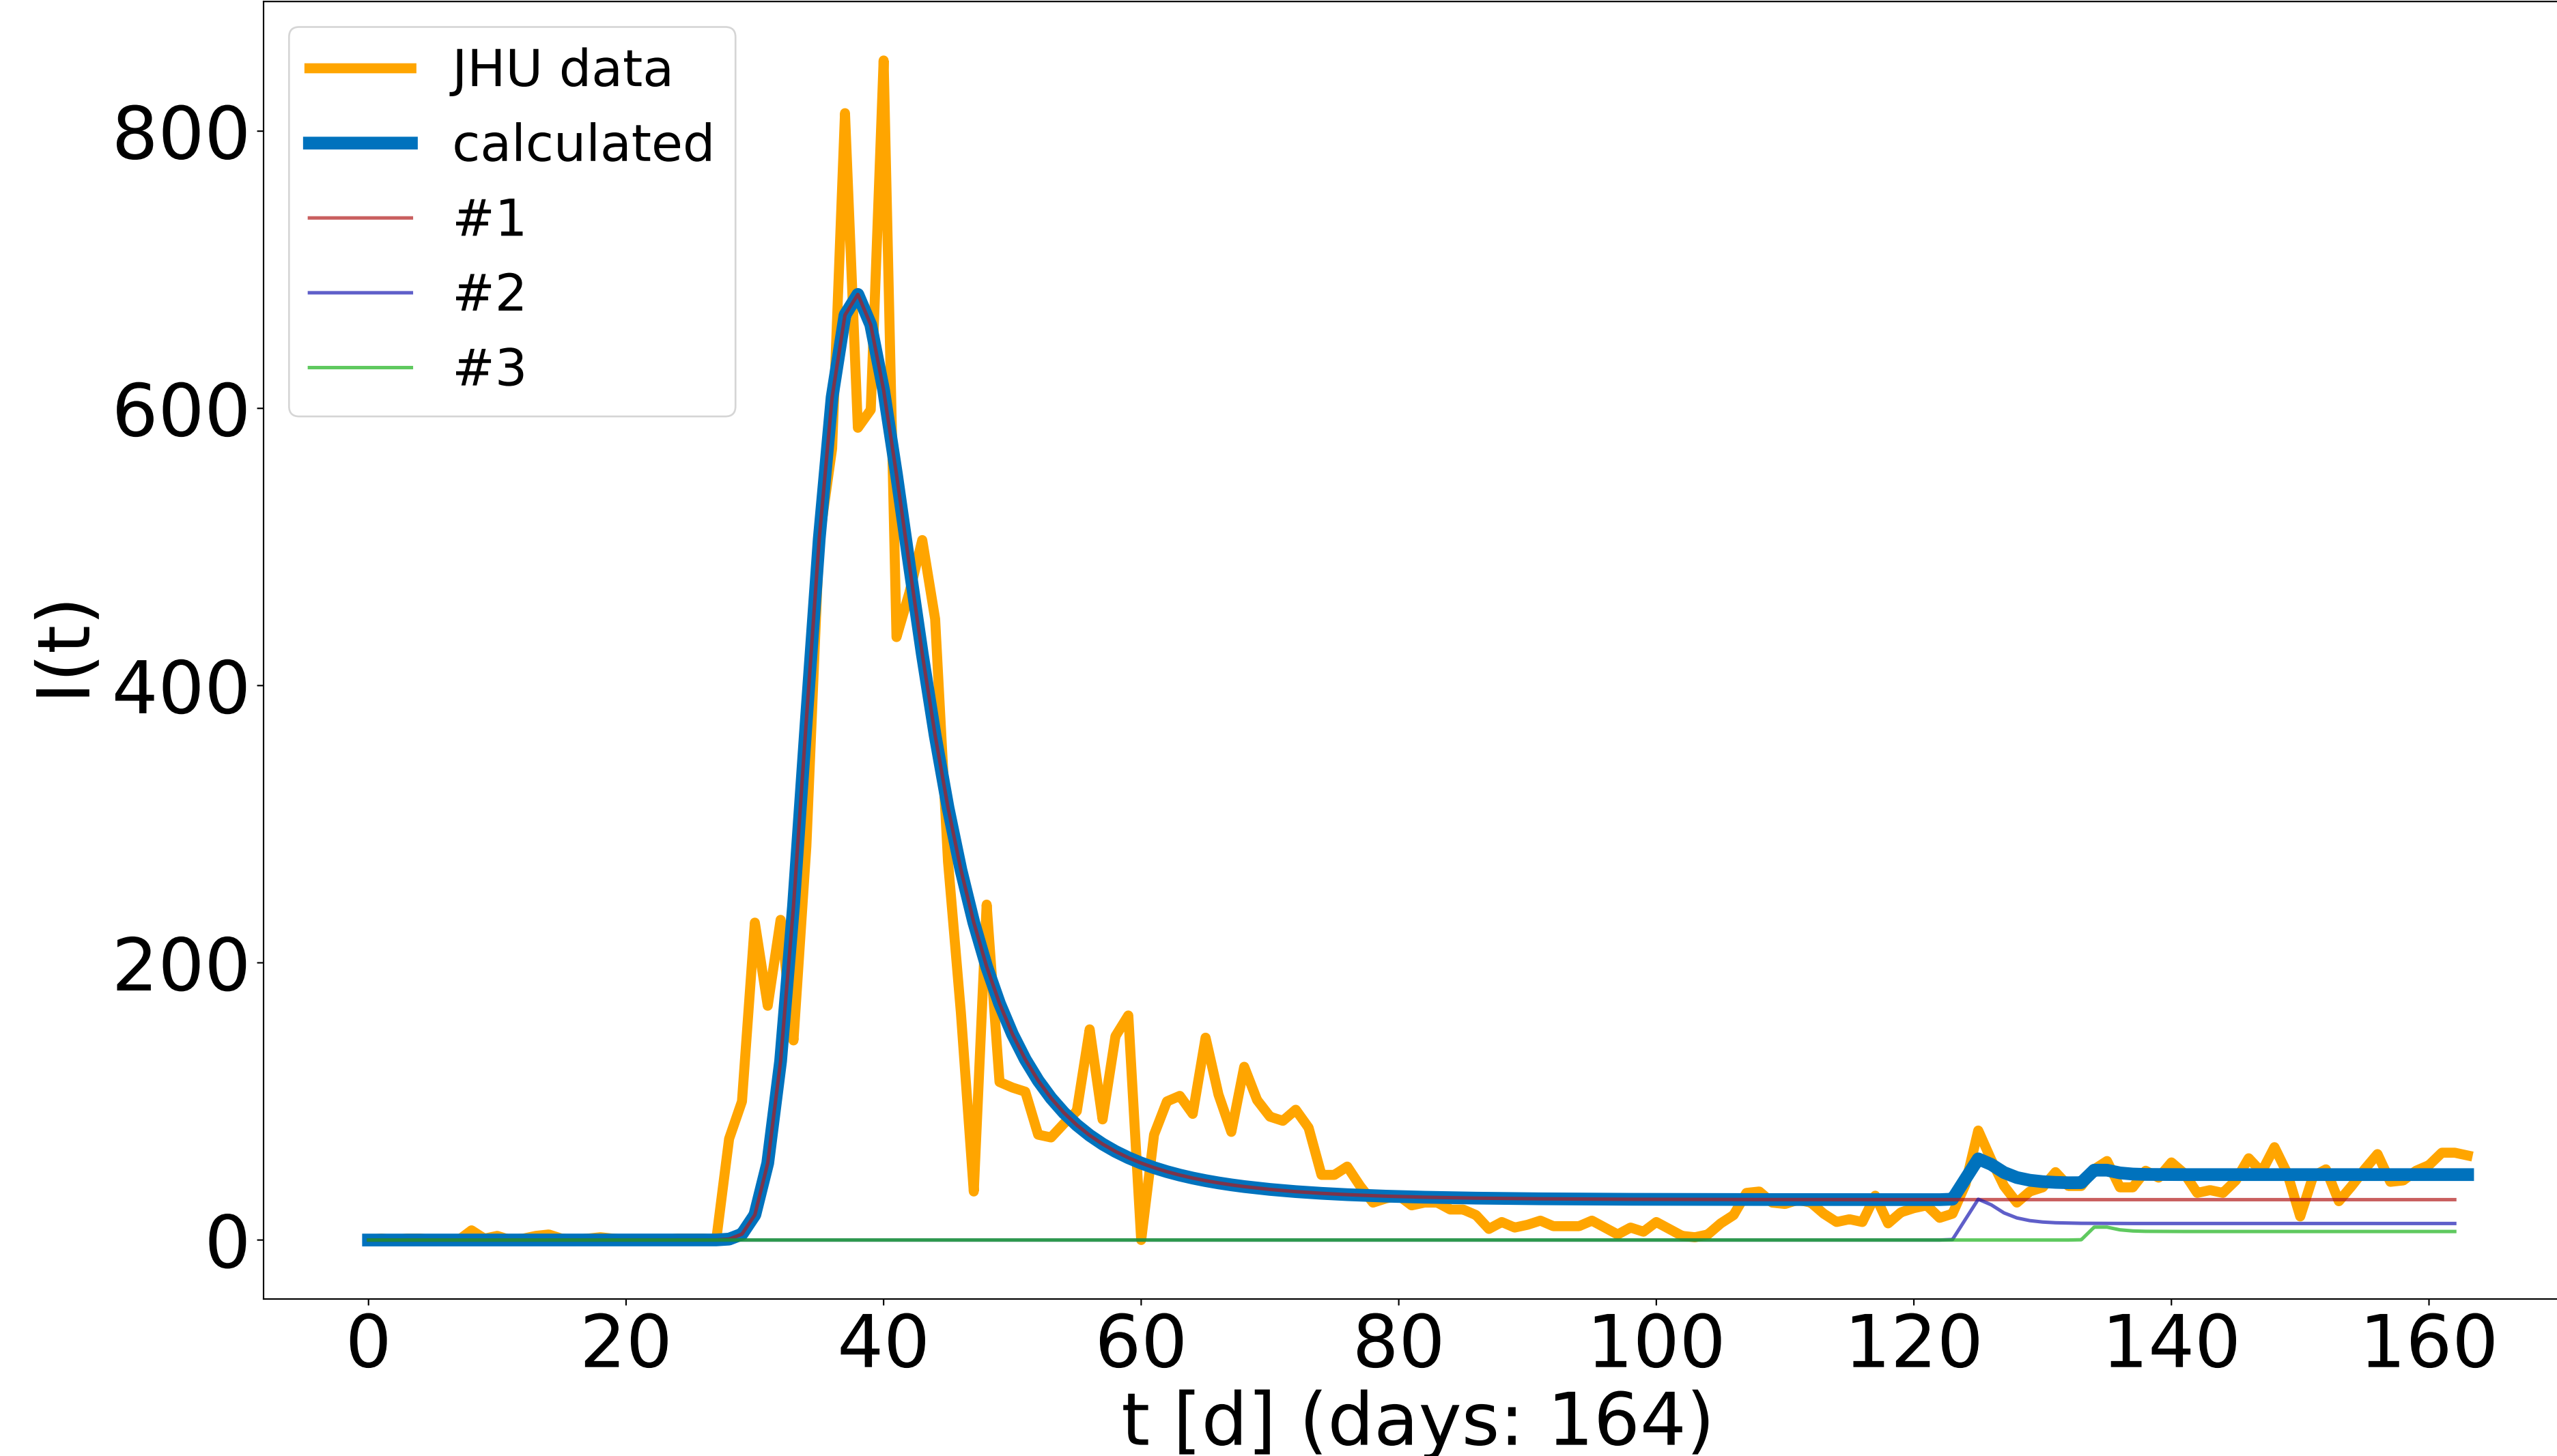

Korea, South ( $R^2 = 0.989$ )  
(i: 0.1, a: 1.561, b: 0.066, t: 23.0)  
(i: 0.3, a: 0.808, b: 0.051, t: 44.3)  
(i: 44.9, a: 0.01, b: 0.041, t: 140.0)

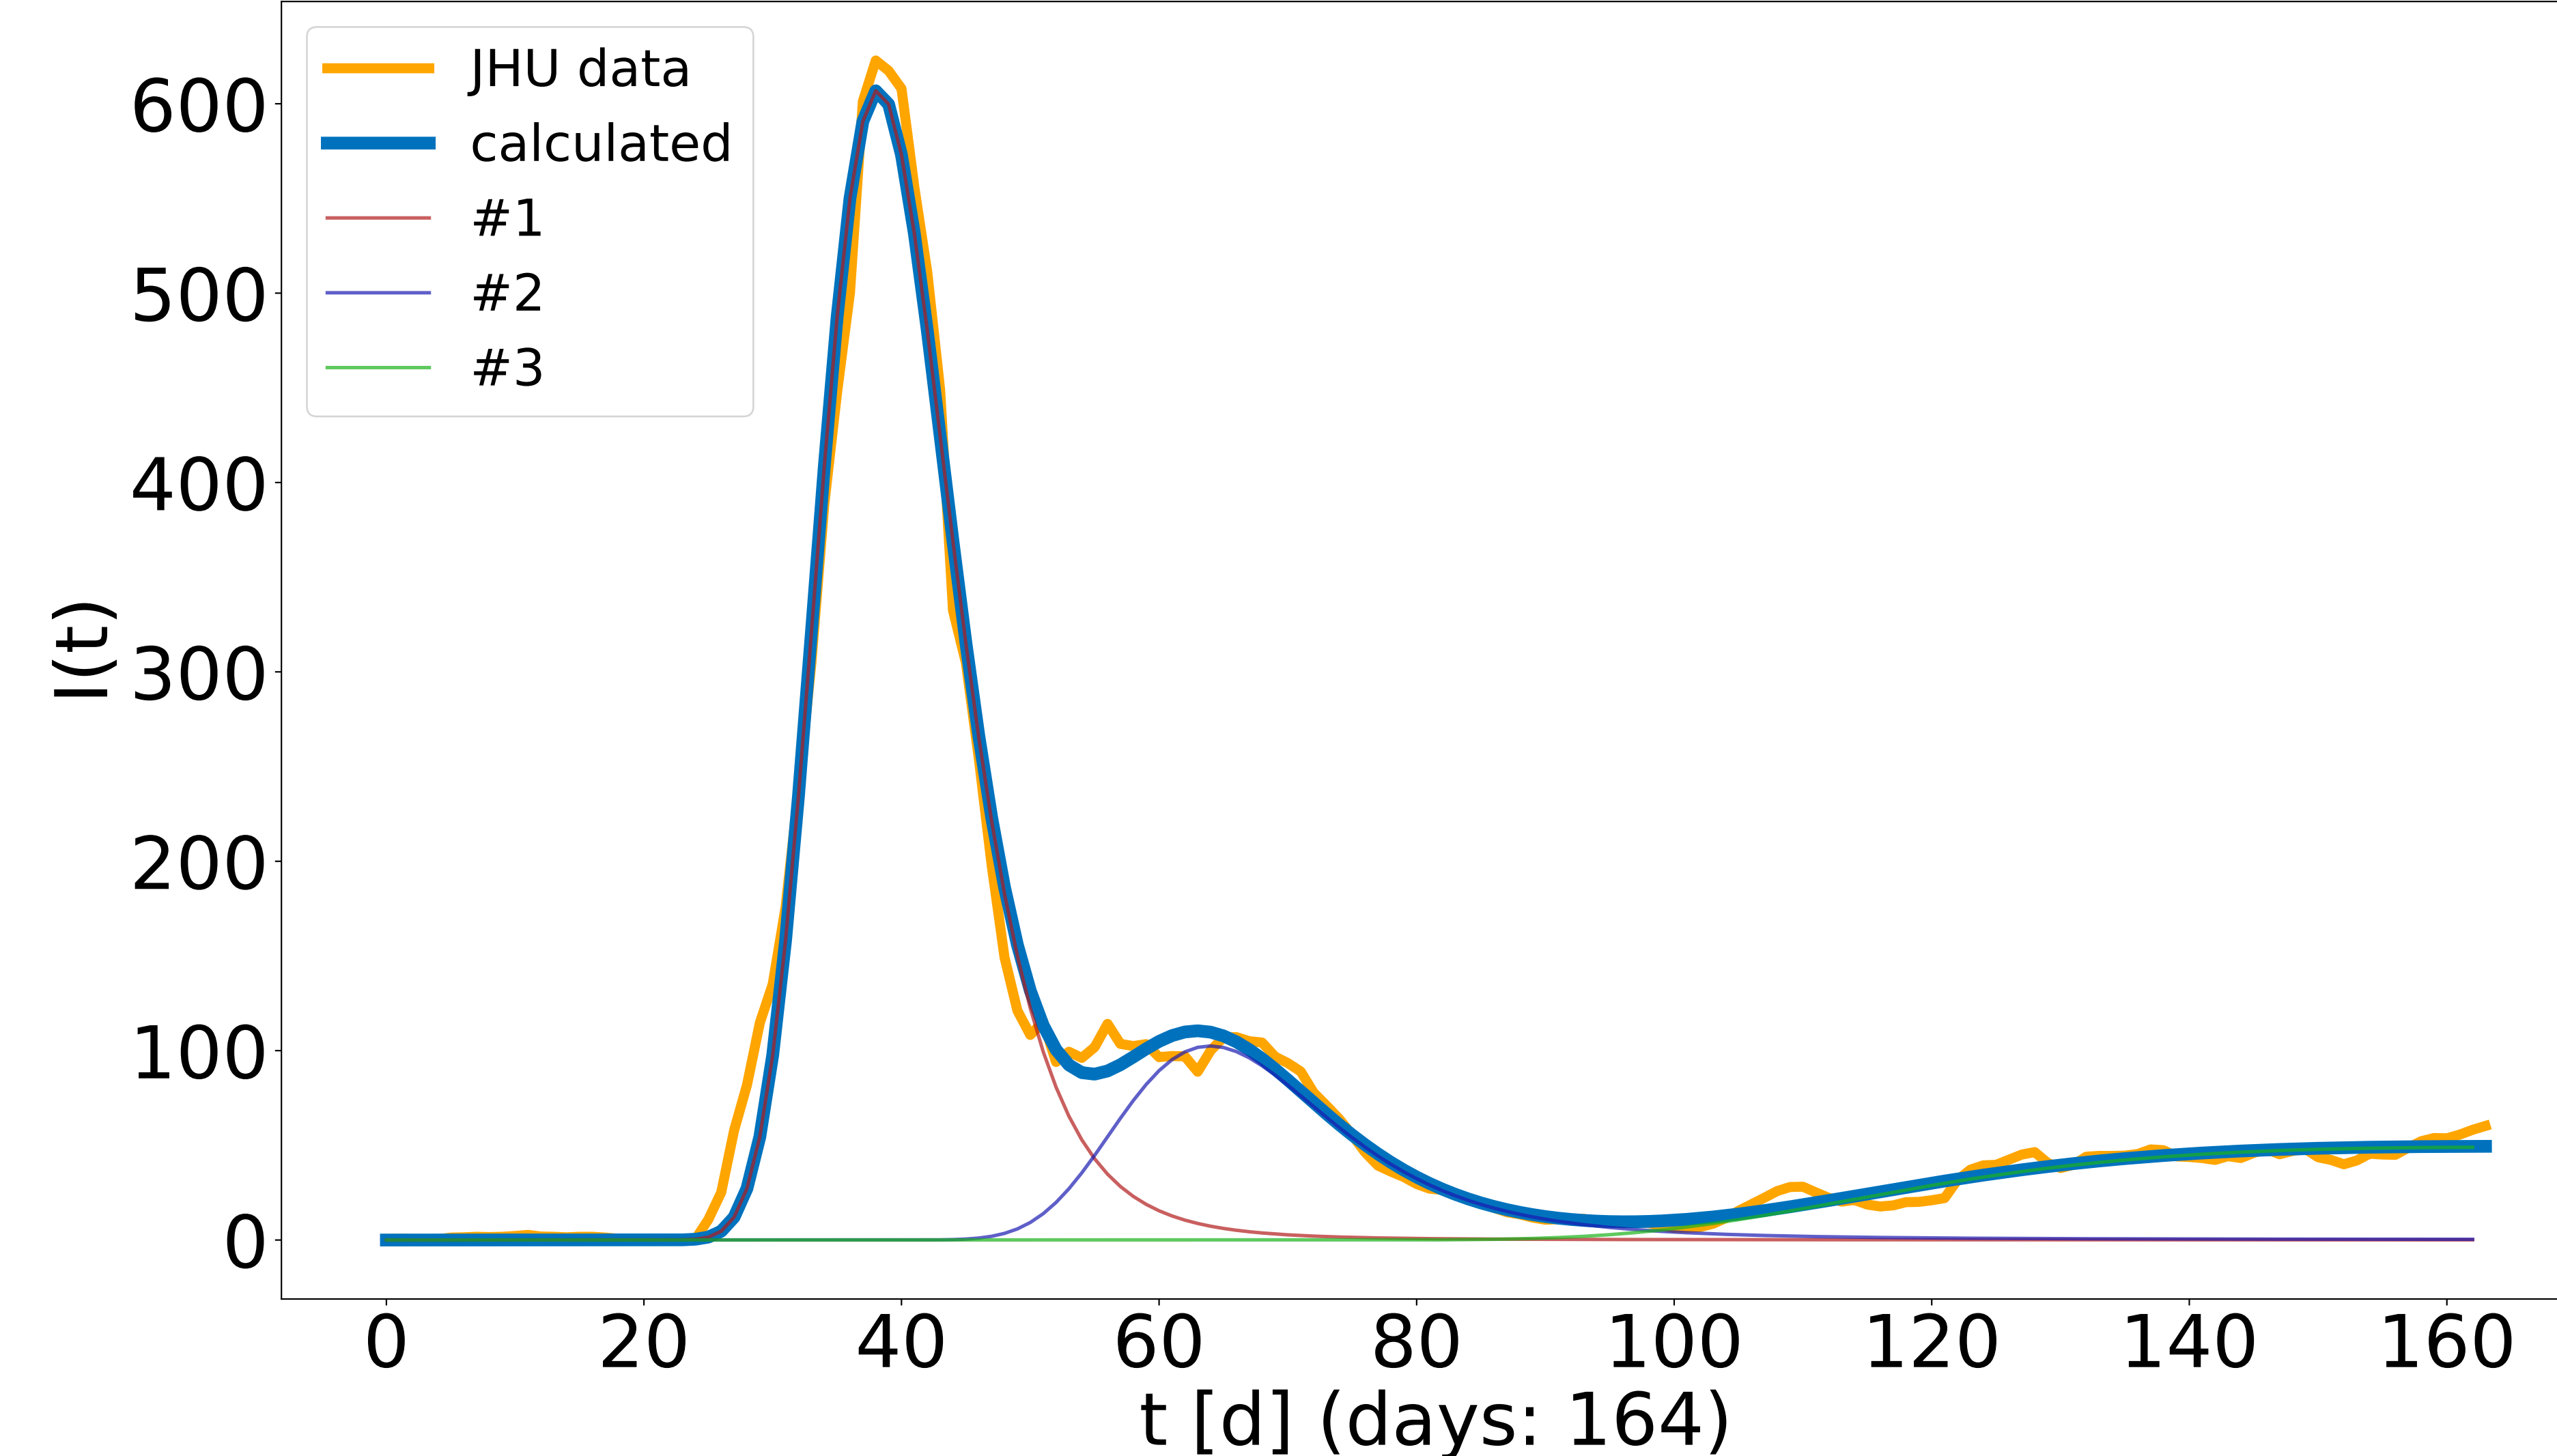

Norway ( $R^2 = 0.854$ )  
(i: 7.6, a: 2.0, b: 0.23, t: 10.2)  
(i: 10.8, a: 0.634, b: 0.073, t: 16.2)  
(i: 0.9, a: 1.837, b: 1.229, t: 138.8)

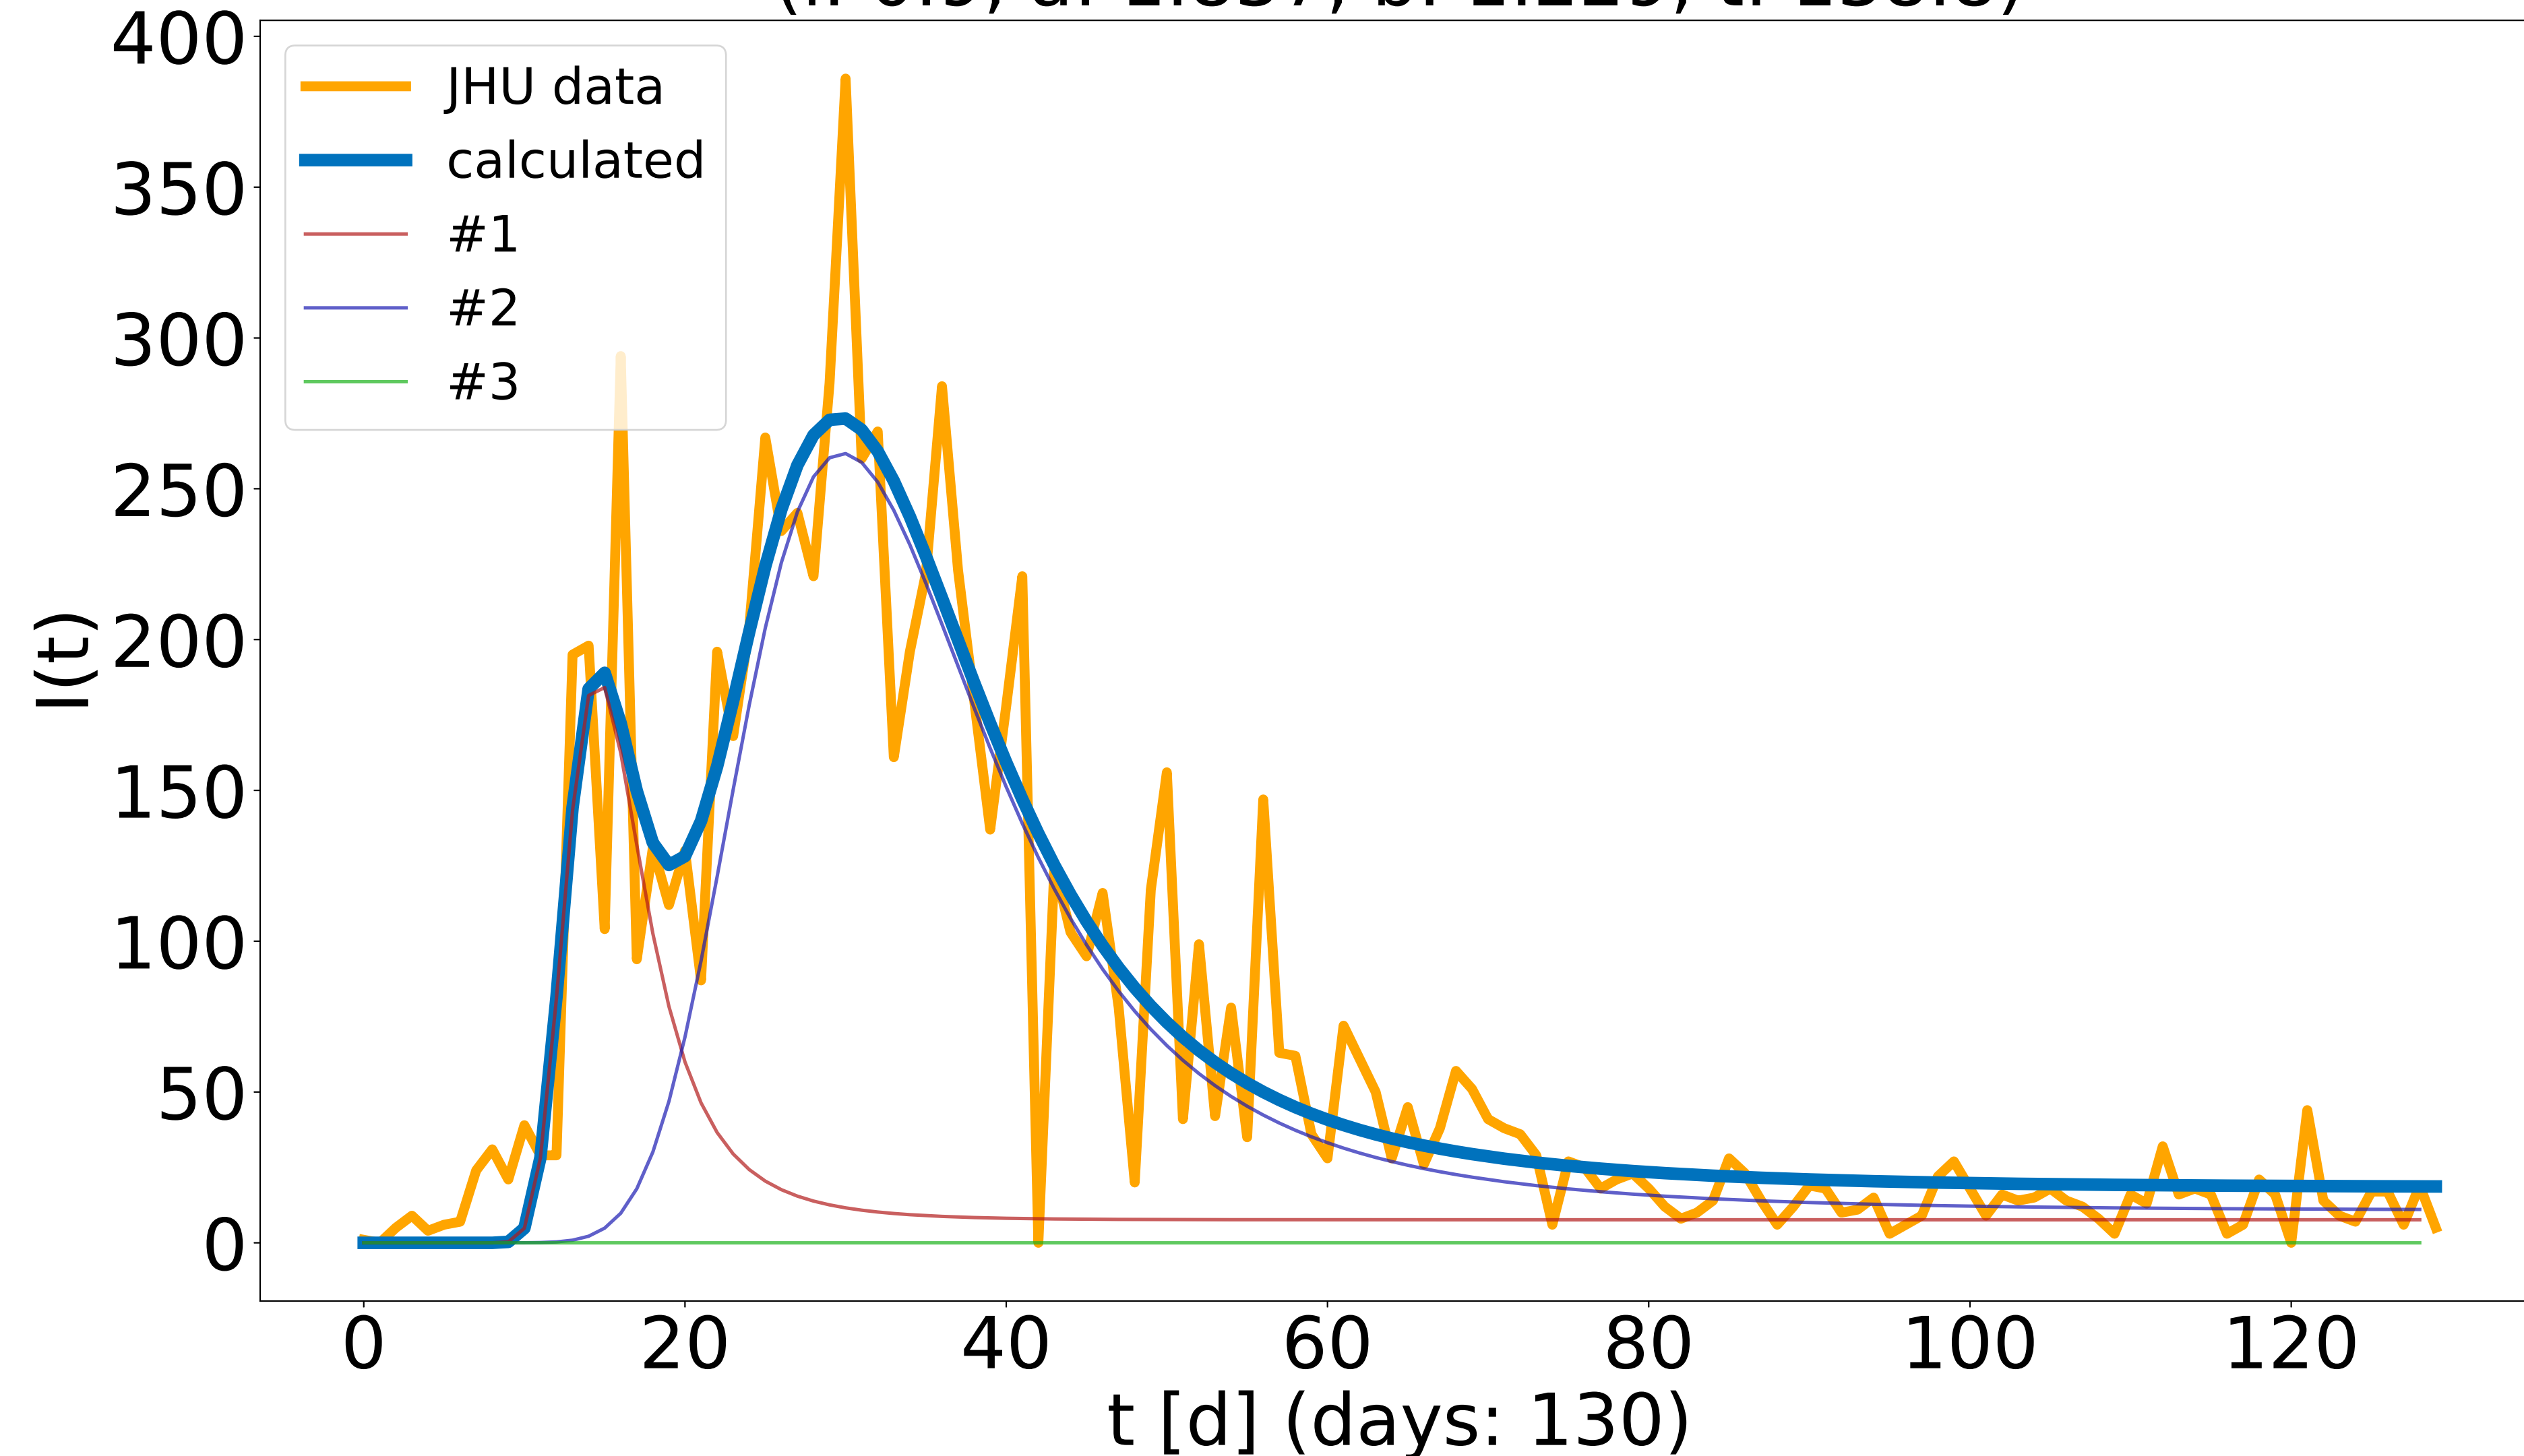

Norway ( $R^2 = 0.987$ )  
(i: 0.1, a: 1.873, b: 0.095, t: 4.3)  
(i: 16.3, a: 0.557, b: 0.074, t: 16.7)  
(i: 1.0, a: 0.082, b: 1.131, t: 137.3)

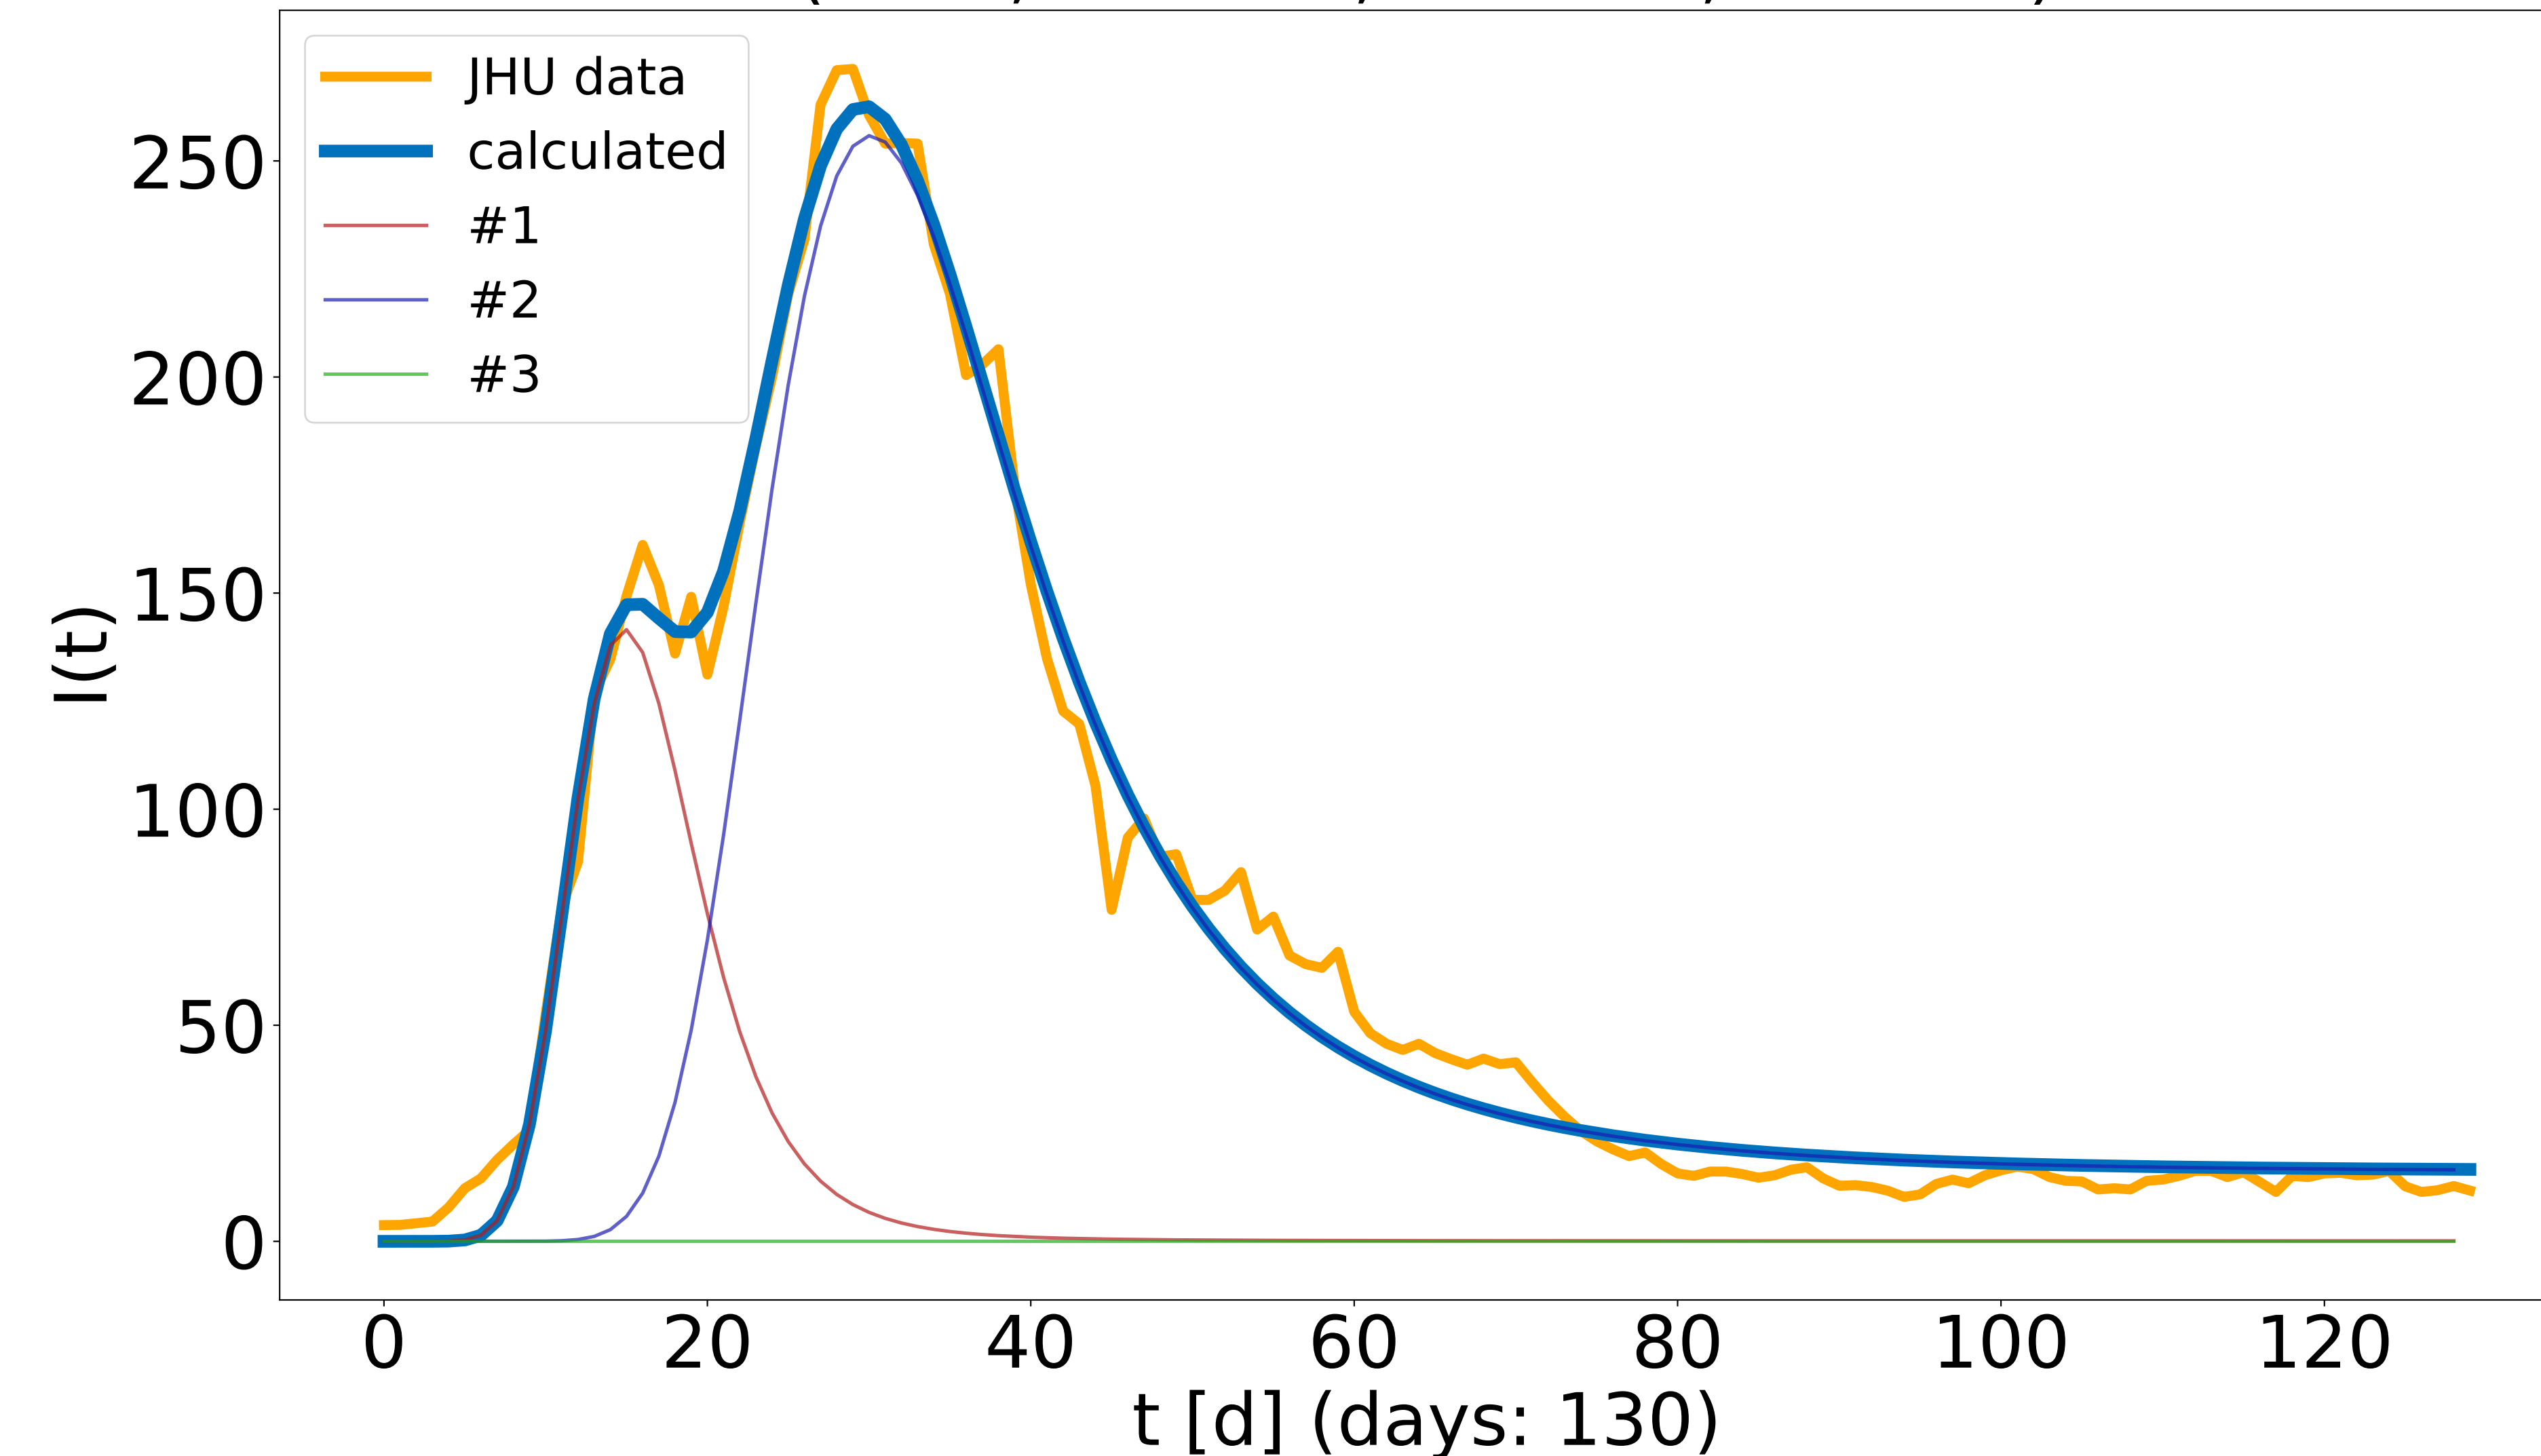

Philippines ( $R^2 = 0.851$ )  
(i: 223.2, a: 0.446, b: 0.453, t: 57.8)  
(i: 332.7, a: 2.0, b: 1.014, t: 119.0)  
(i: 51.8, a: 0.17, b: 0.001, t: 140.0)

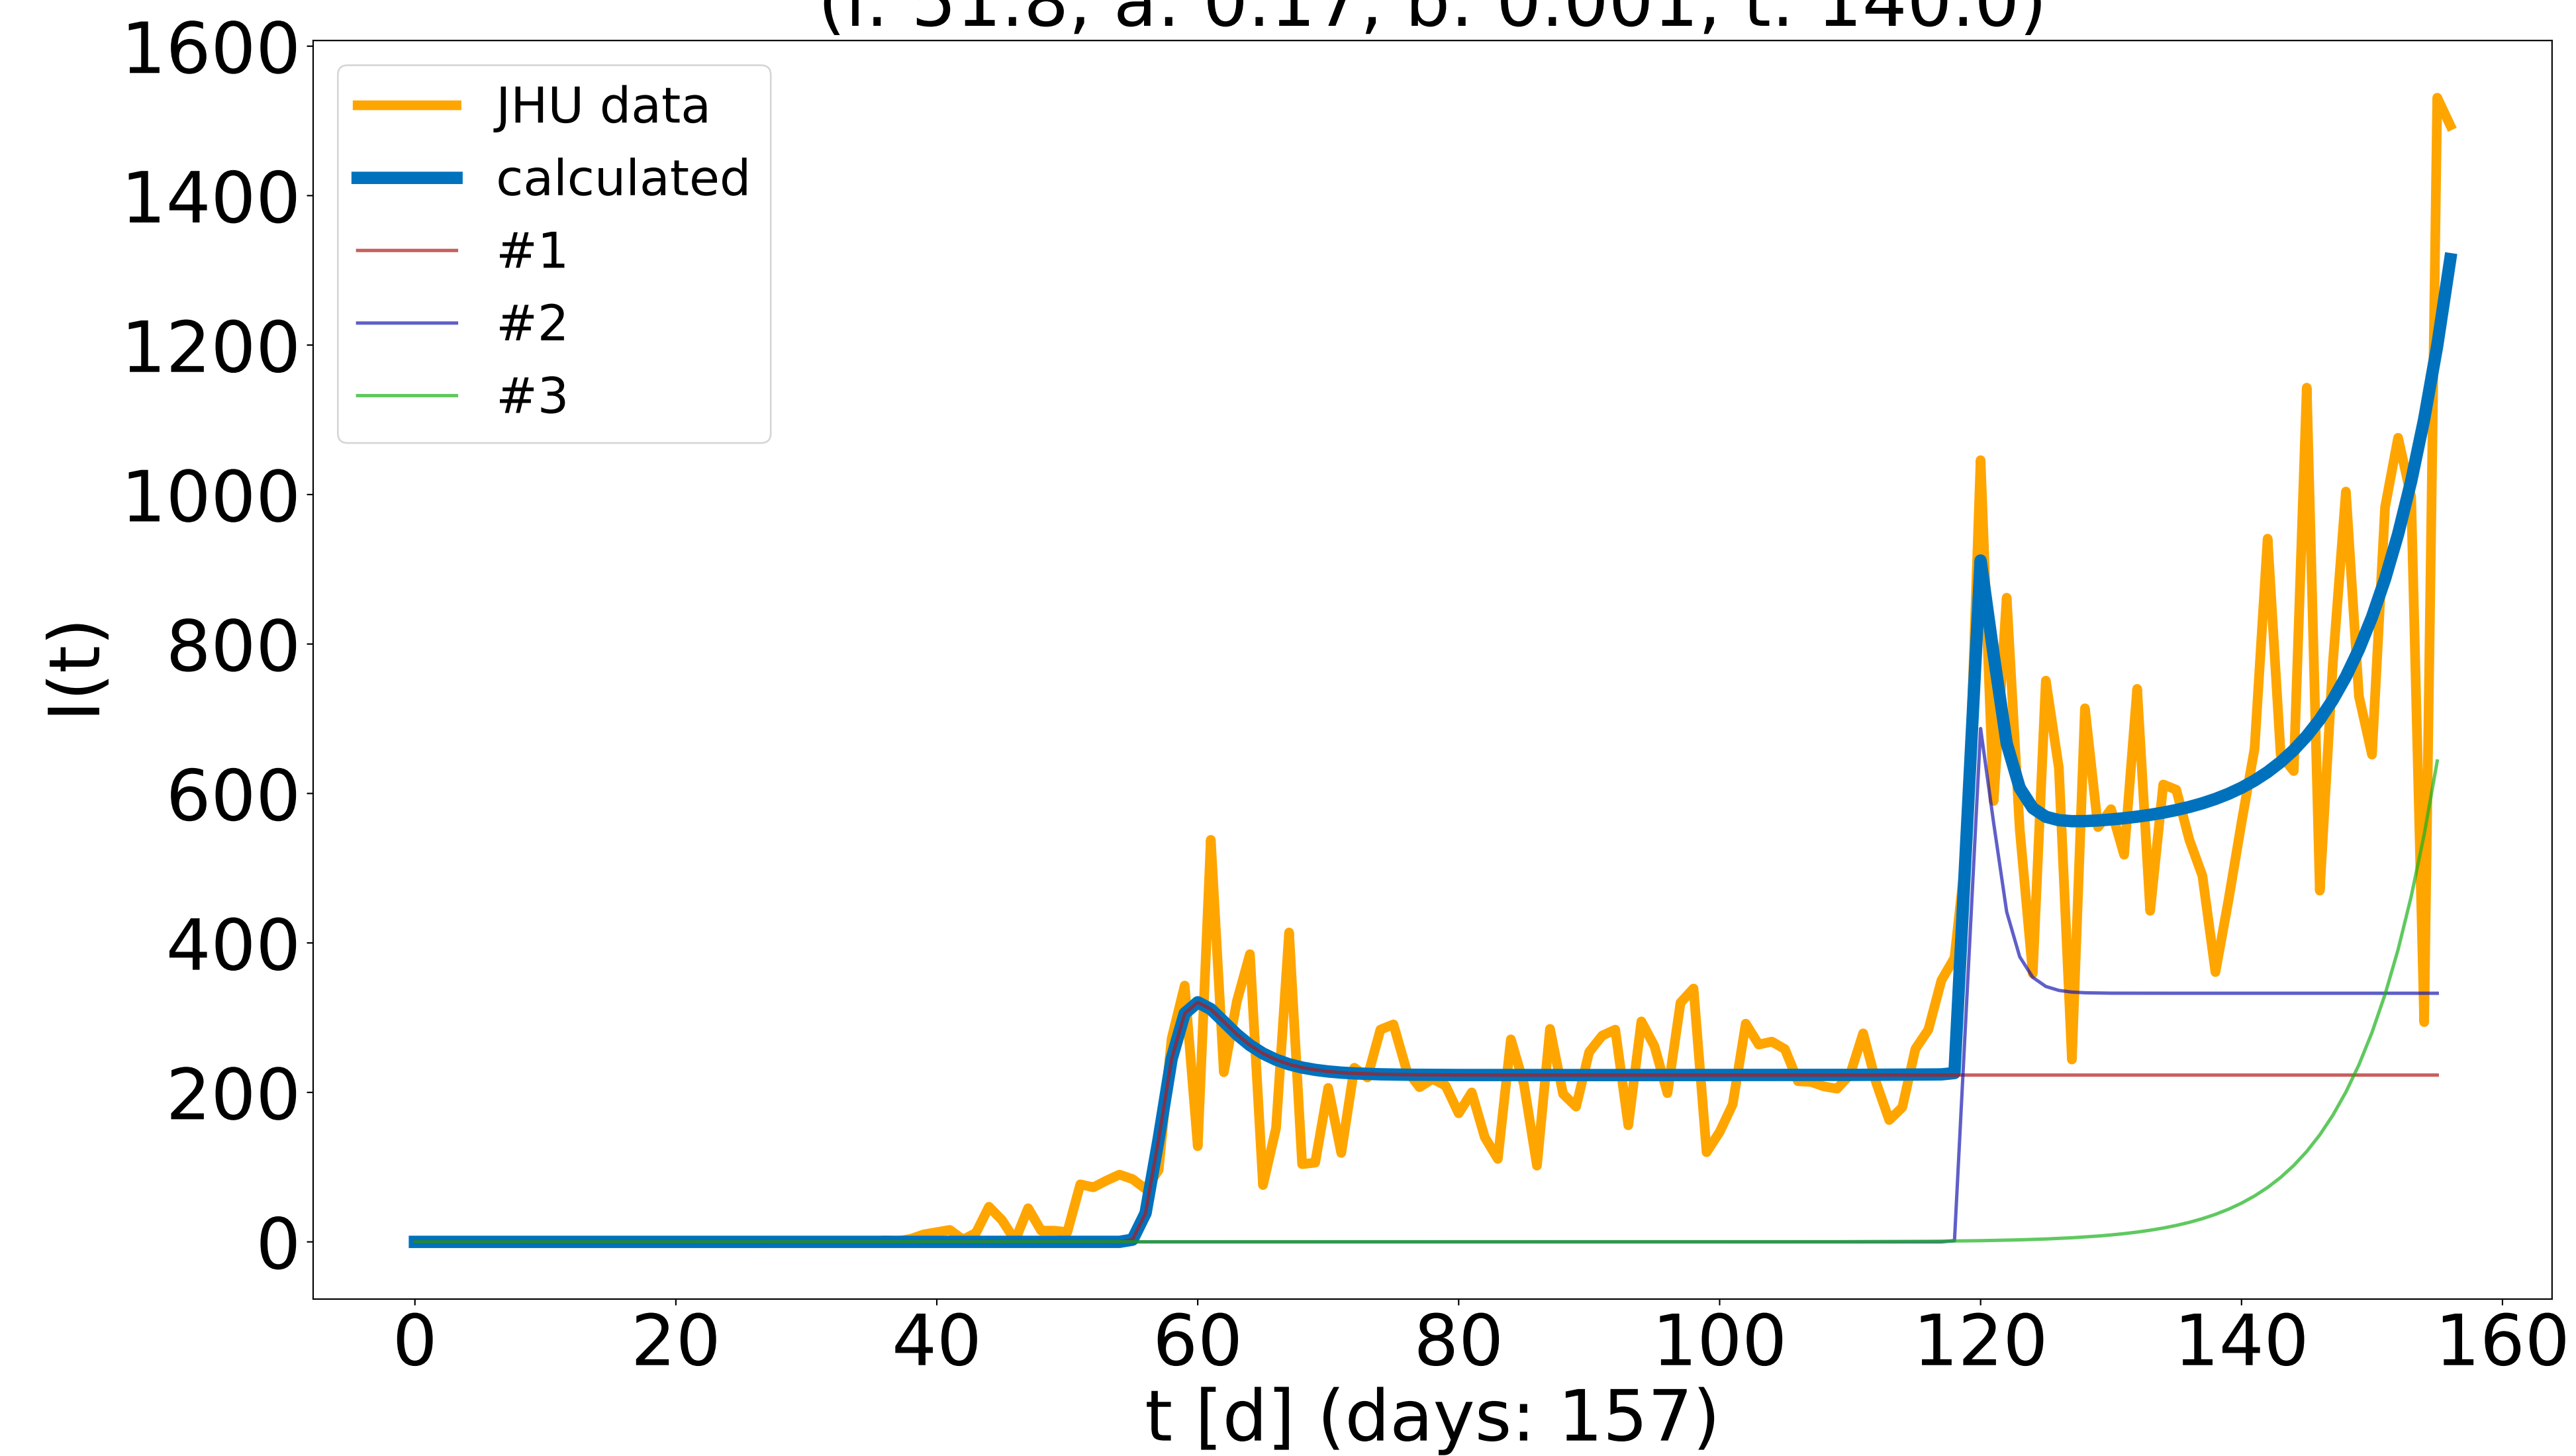

Philippines ( $R^2 = 0.991$ )  
(i: 201.6, a: 0.146, b: 0.225, t: 57.1)  
(i: 133.2, a: 0.647, b: 0.236, t: 116.9)  
(i: 118.9, a: 0.067, b: 0.001, t: 127.0)

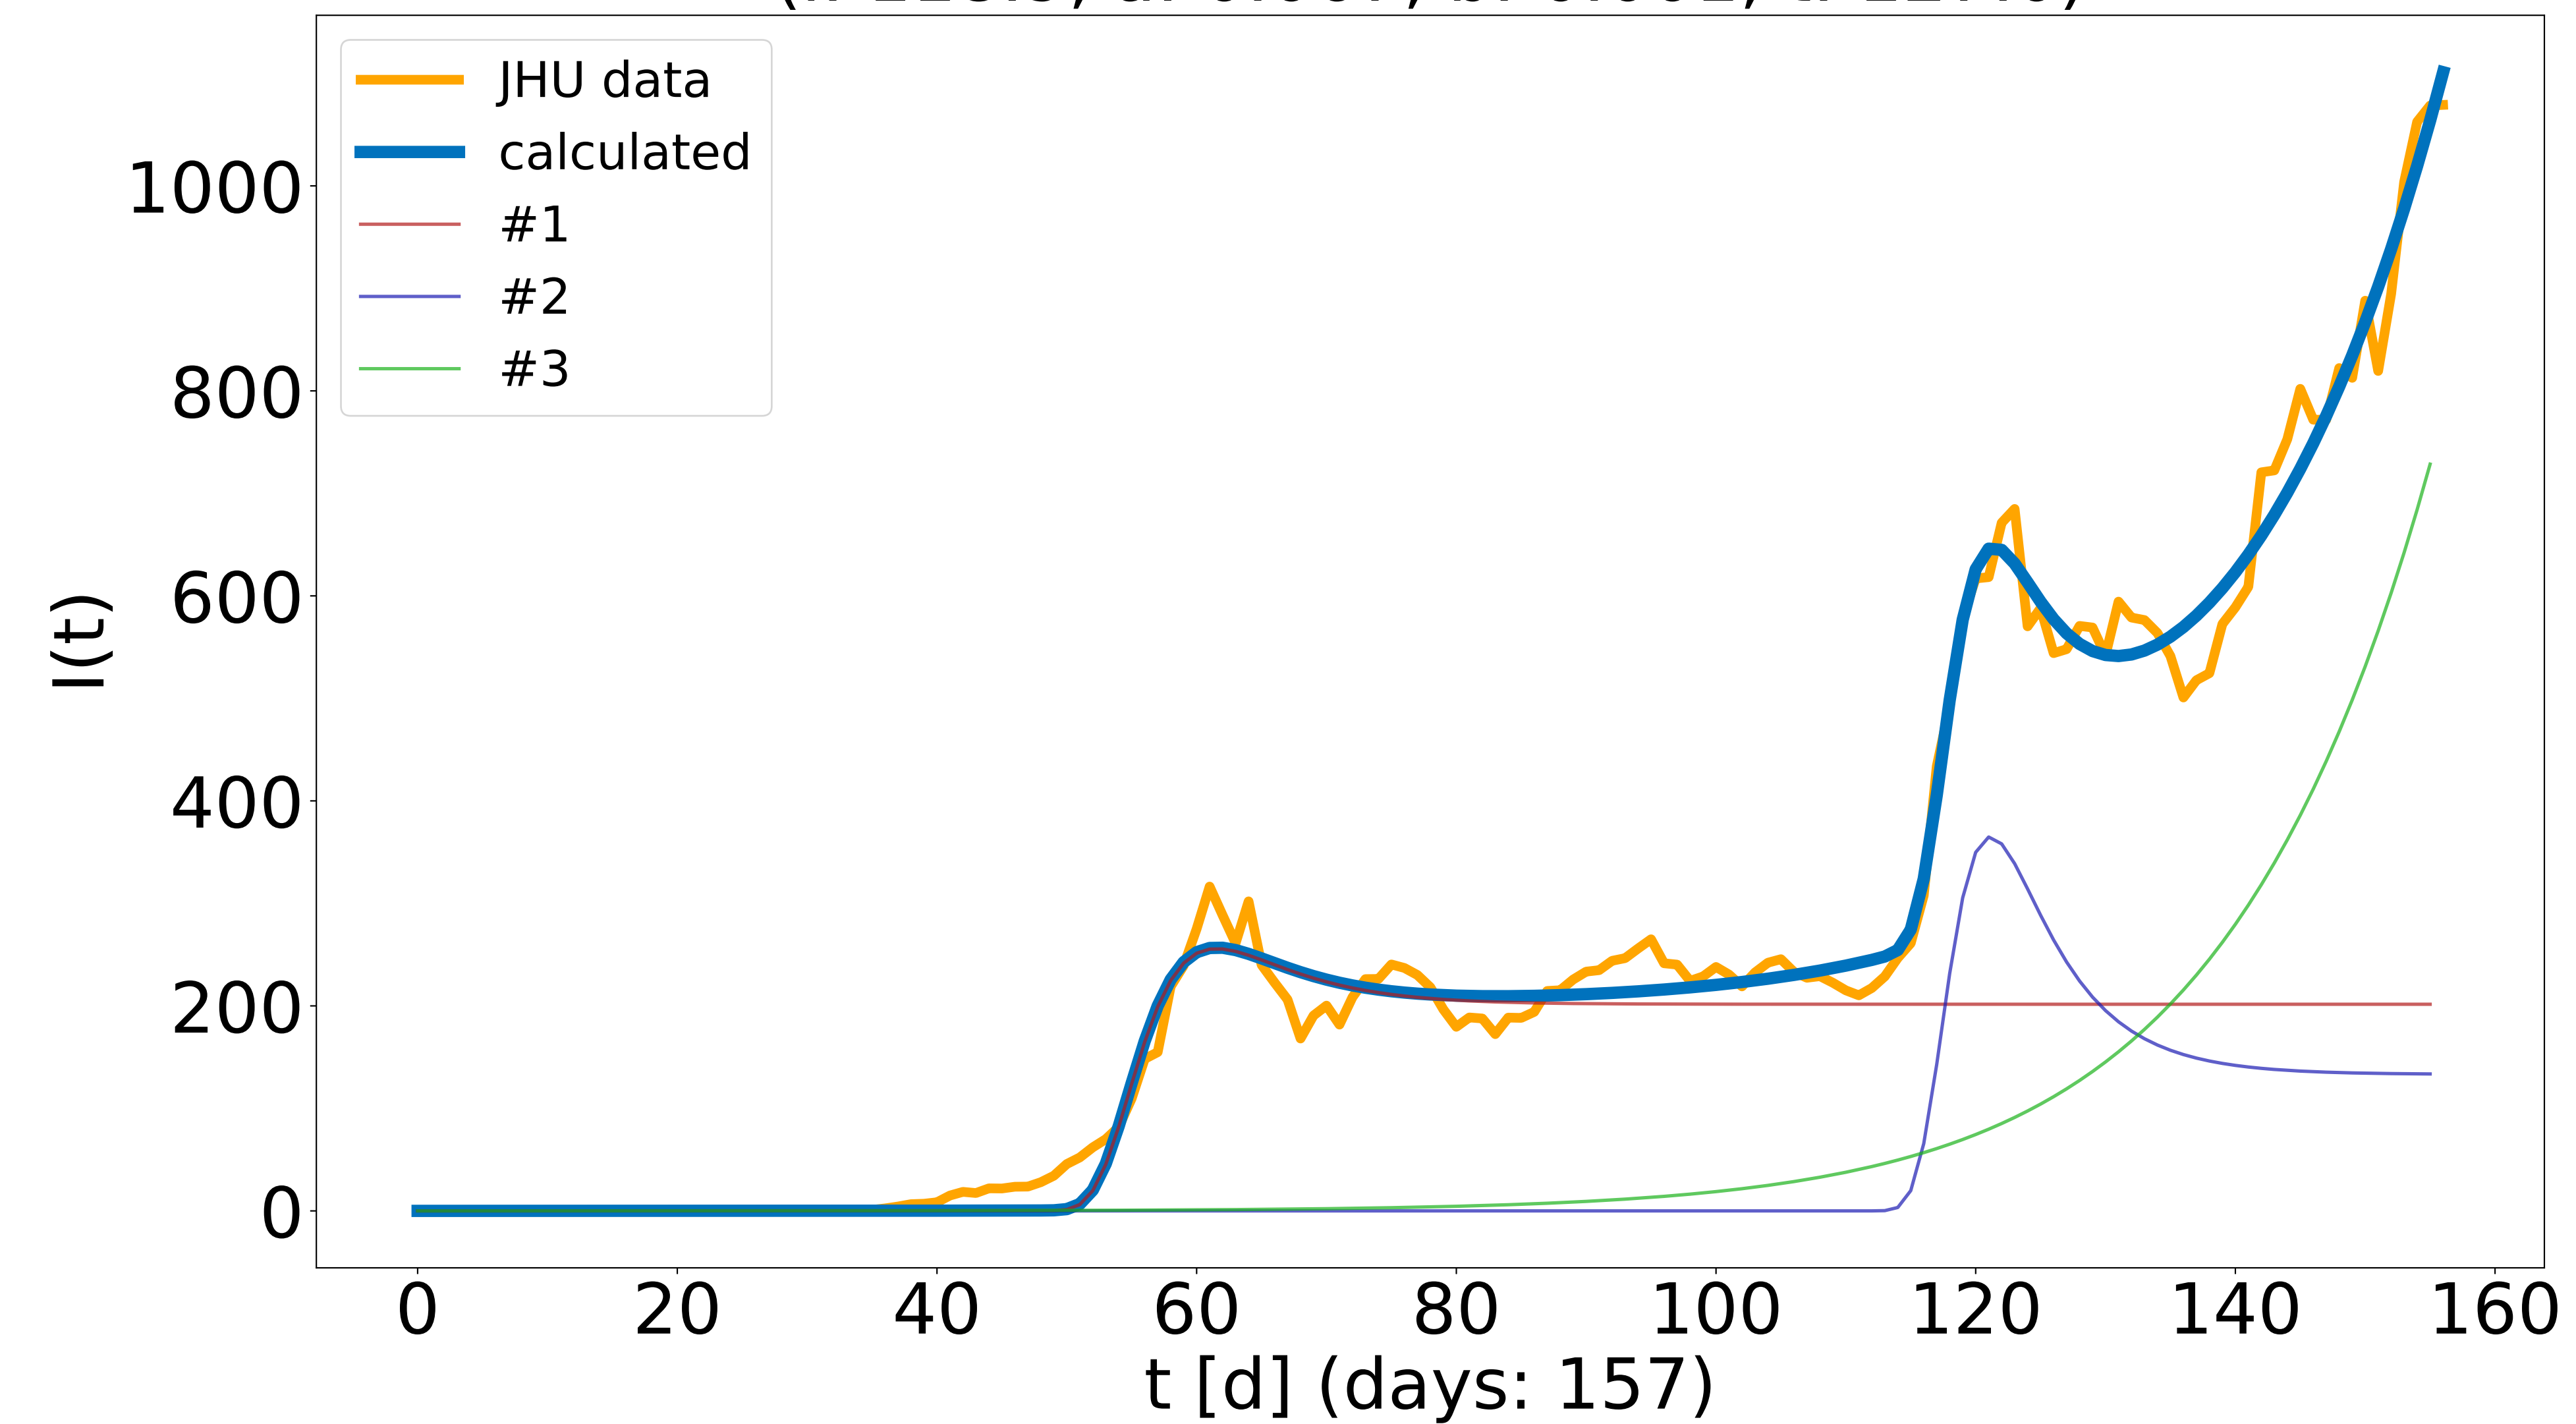

Poland ( $R^2 = 0.757$ )  
(i: 40.1, a: 0.214, b: 0.04, t: 11.8)  
(i: 0.1, a: 0.309, b: 0.015, t: 25.4)  
(i: 81.4, a: 2.0, b: 1.32, t: 28.6)

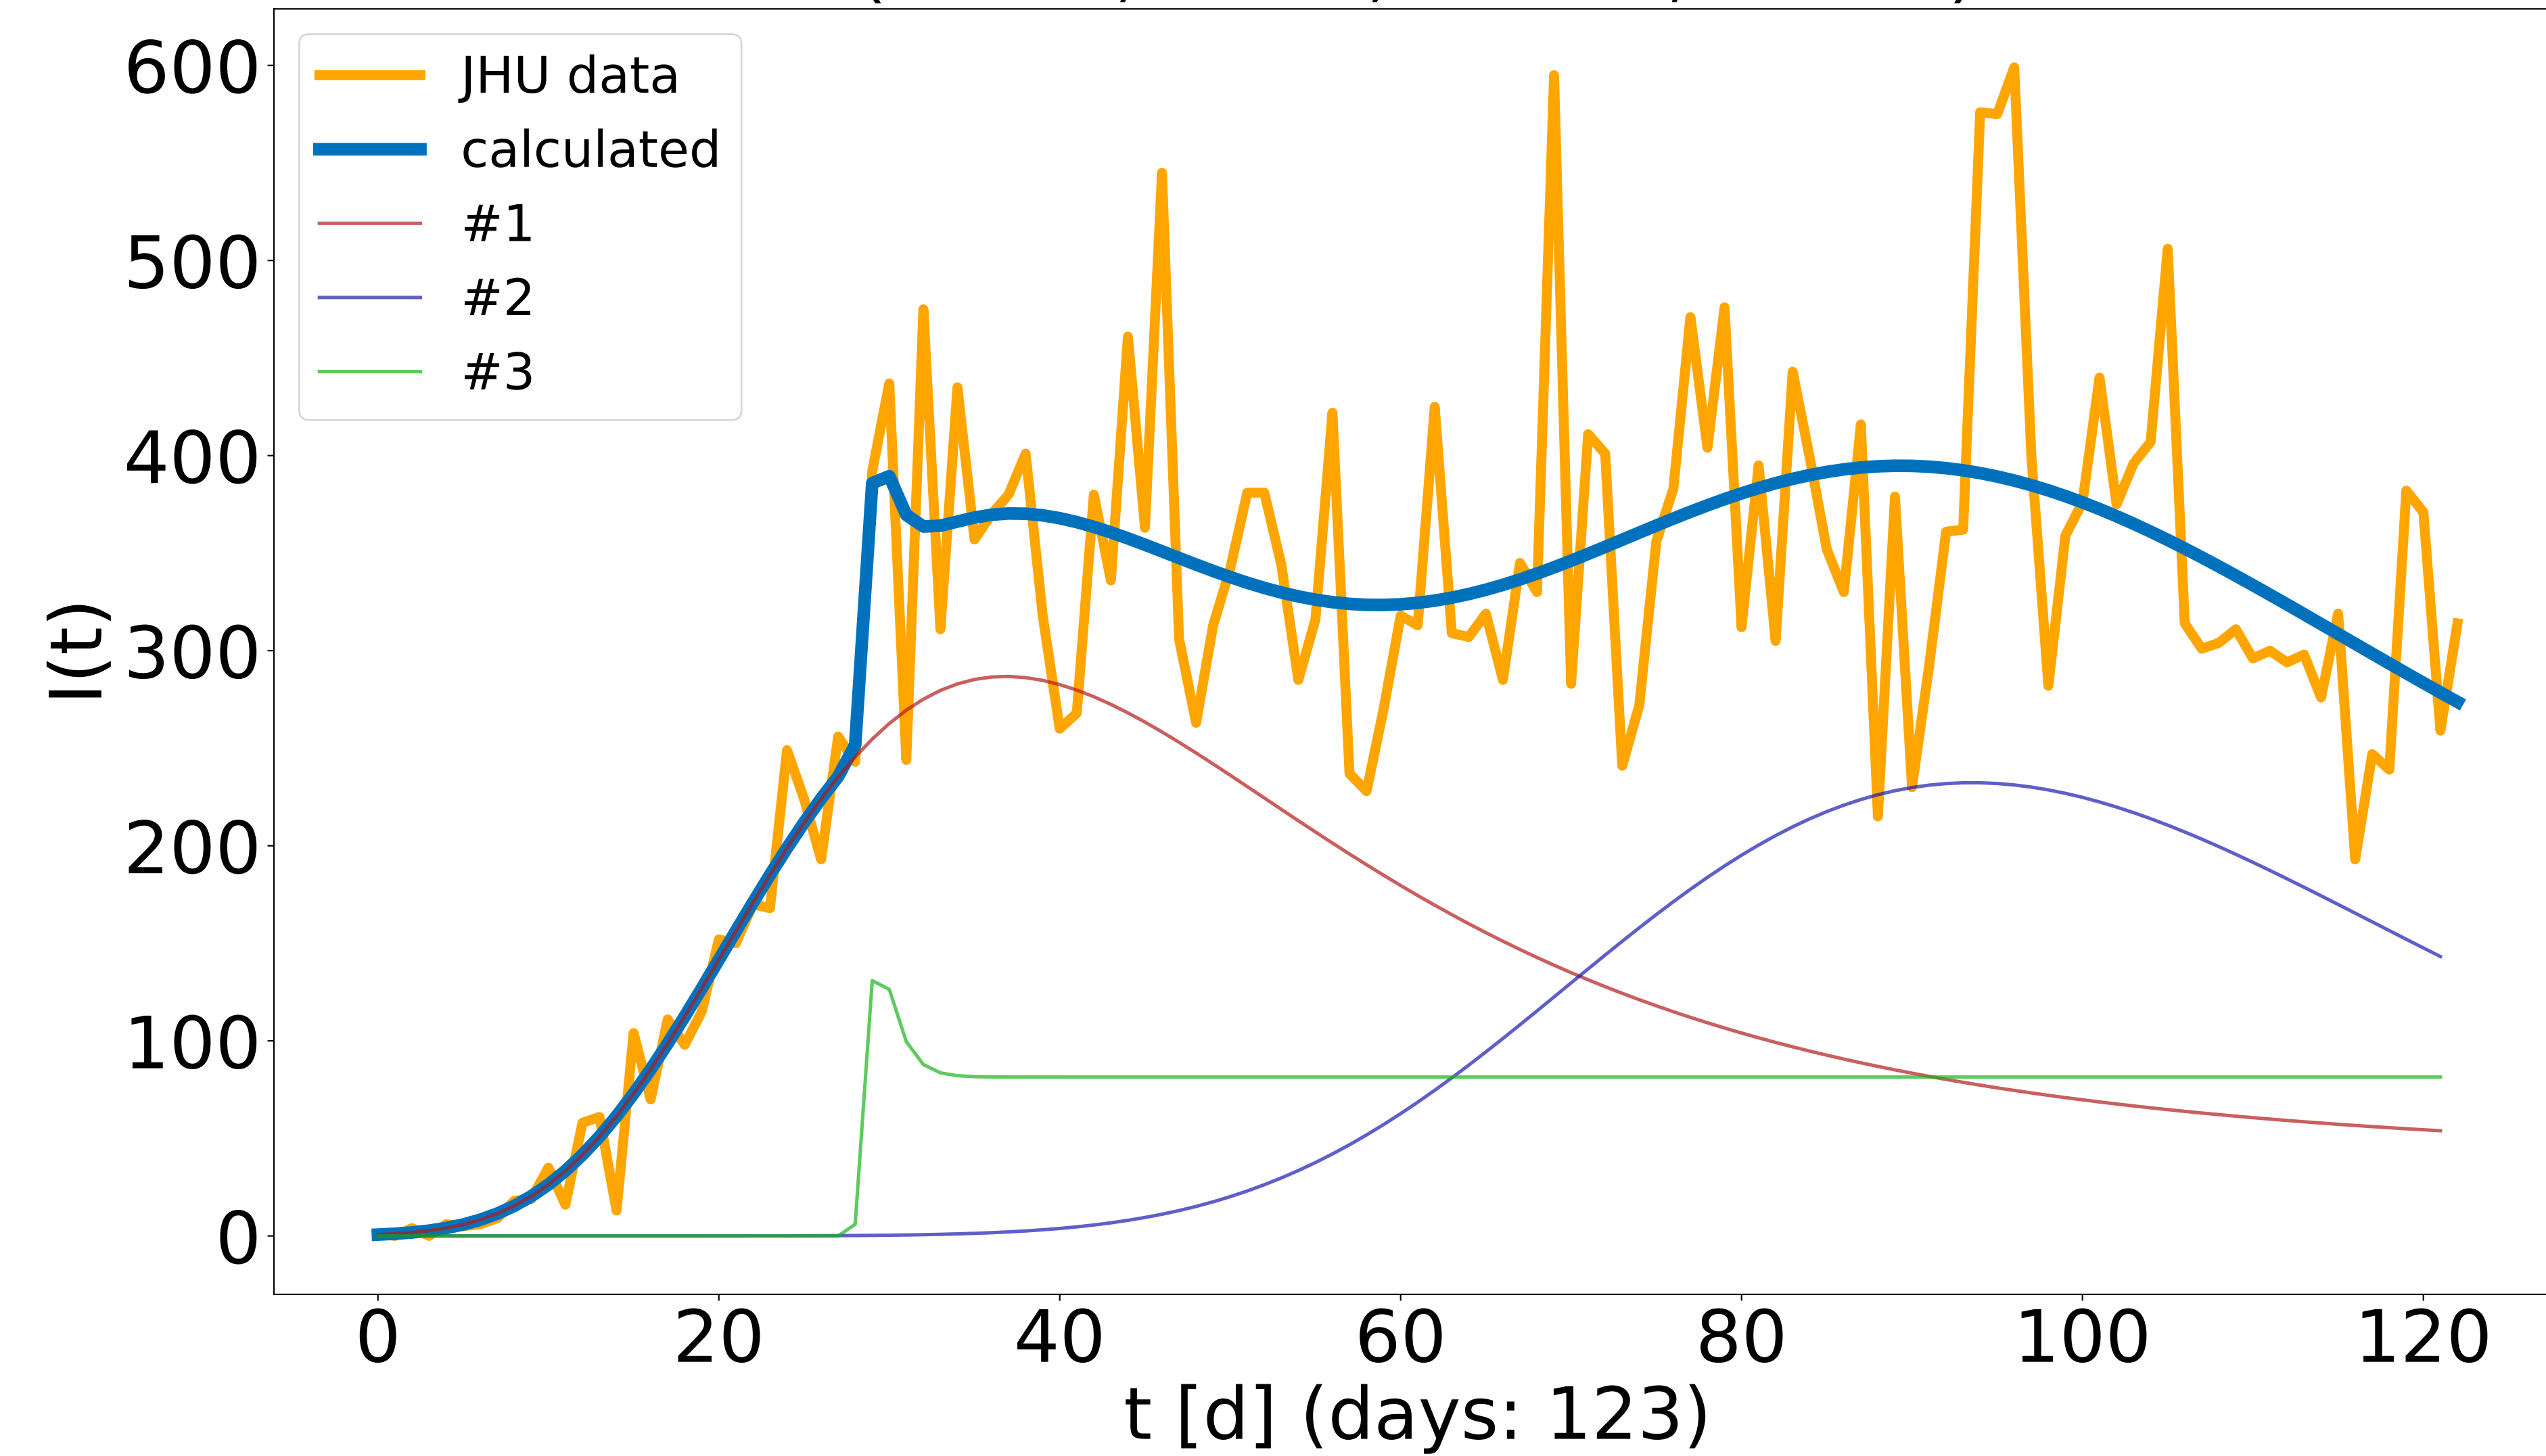

Poland ( $R^2 = 0.981$ )  
(i: 110.7, a: 0.152, b: 0.046, t: 17.9)  
(i: 0.1, a: 0.574, b: 0.028, t: 44.2)  
(i: 139.5, a: 0.27, b: 0.303, t: 93.1)

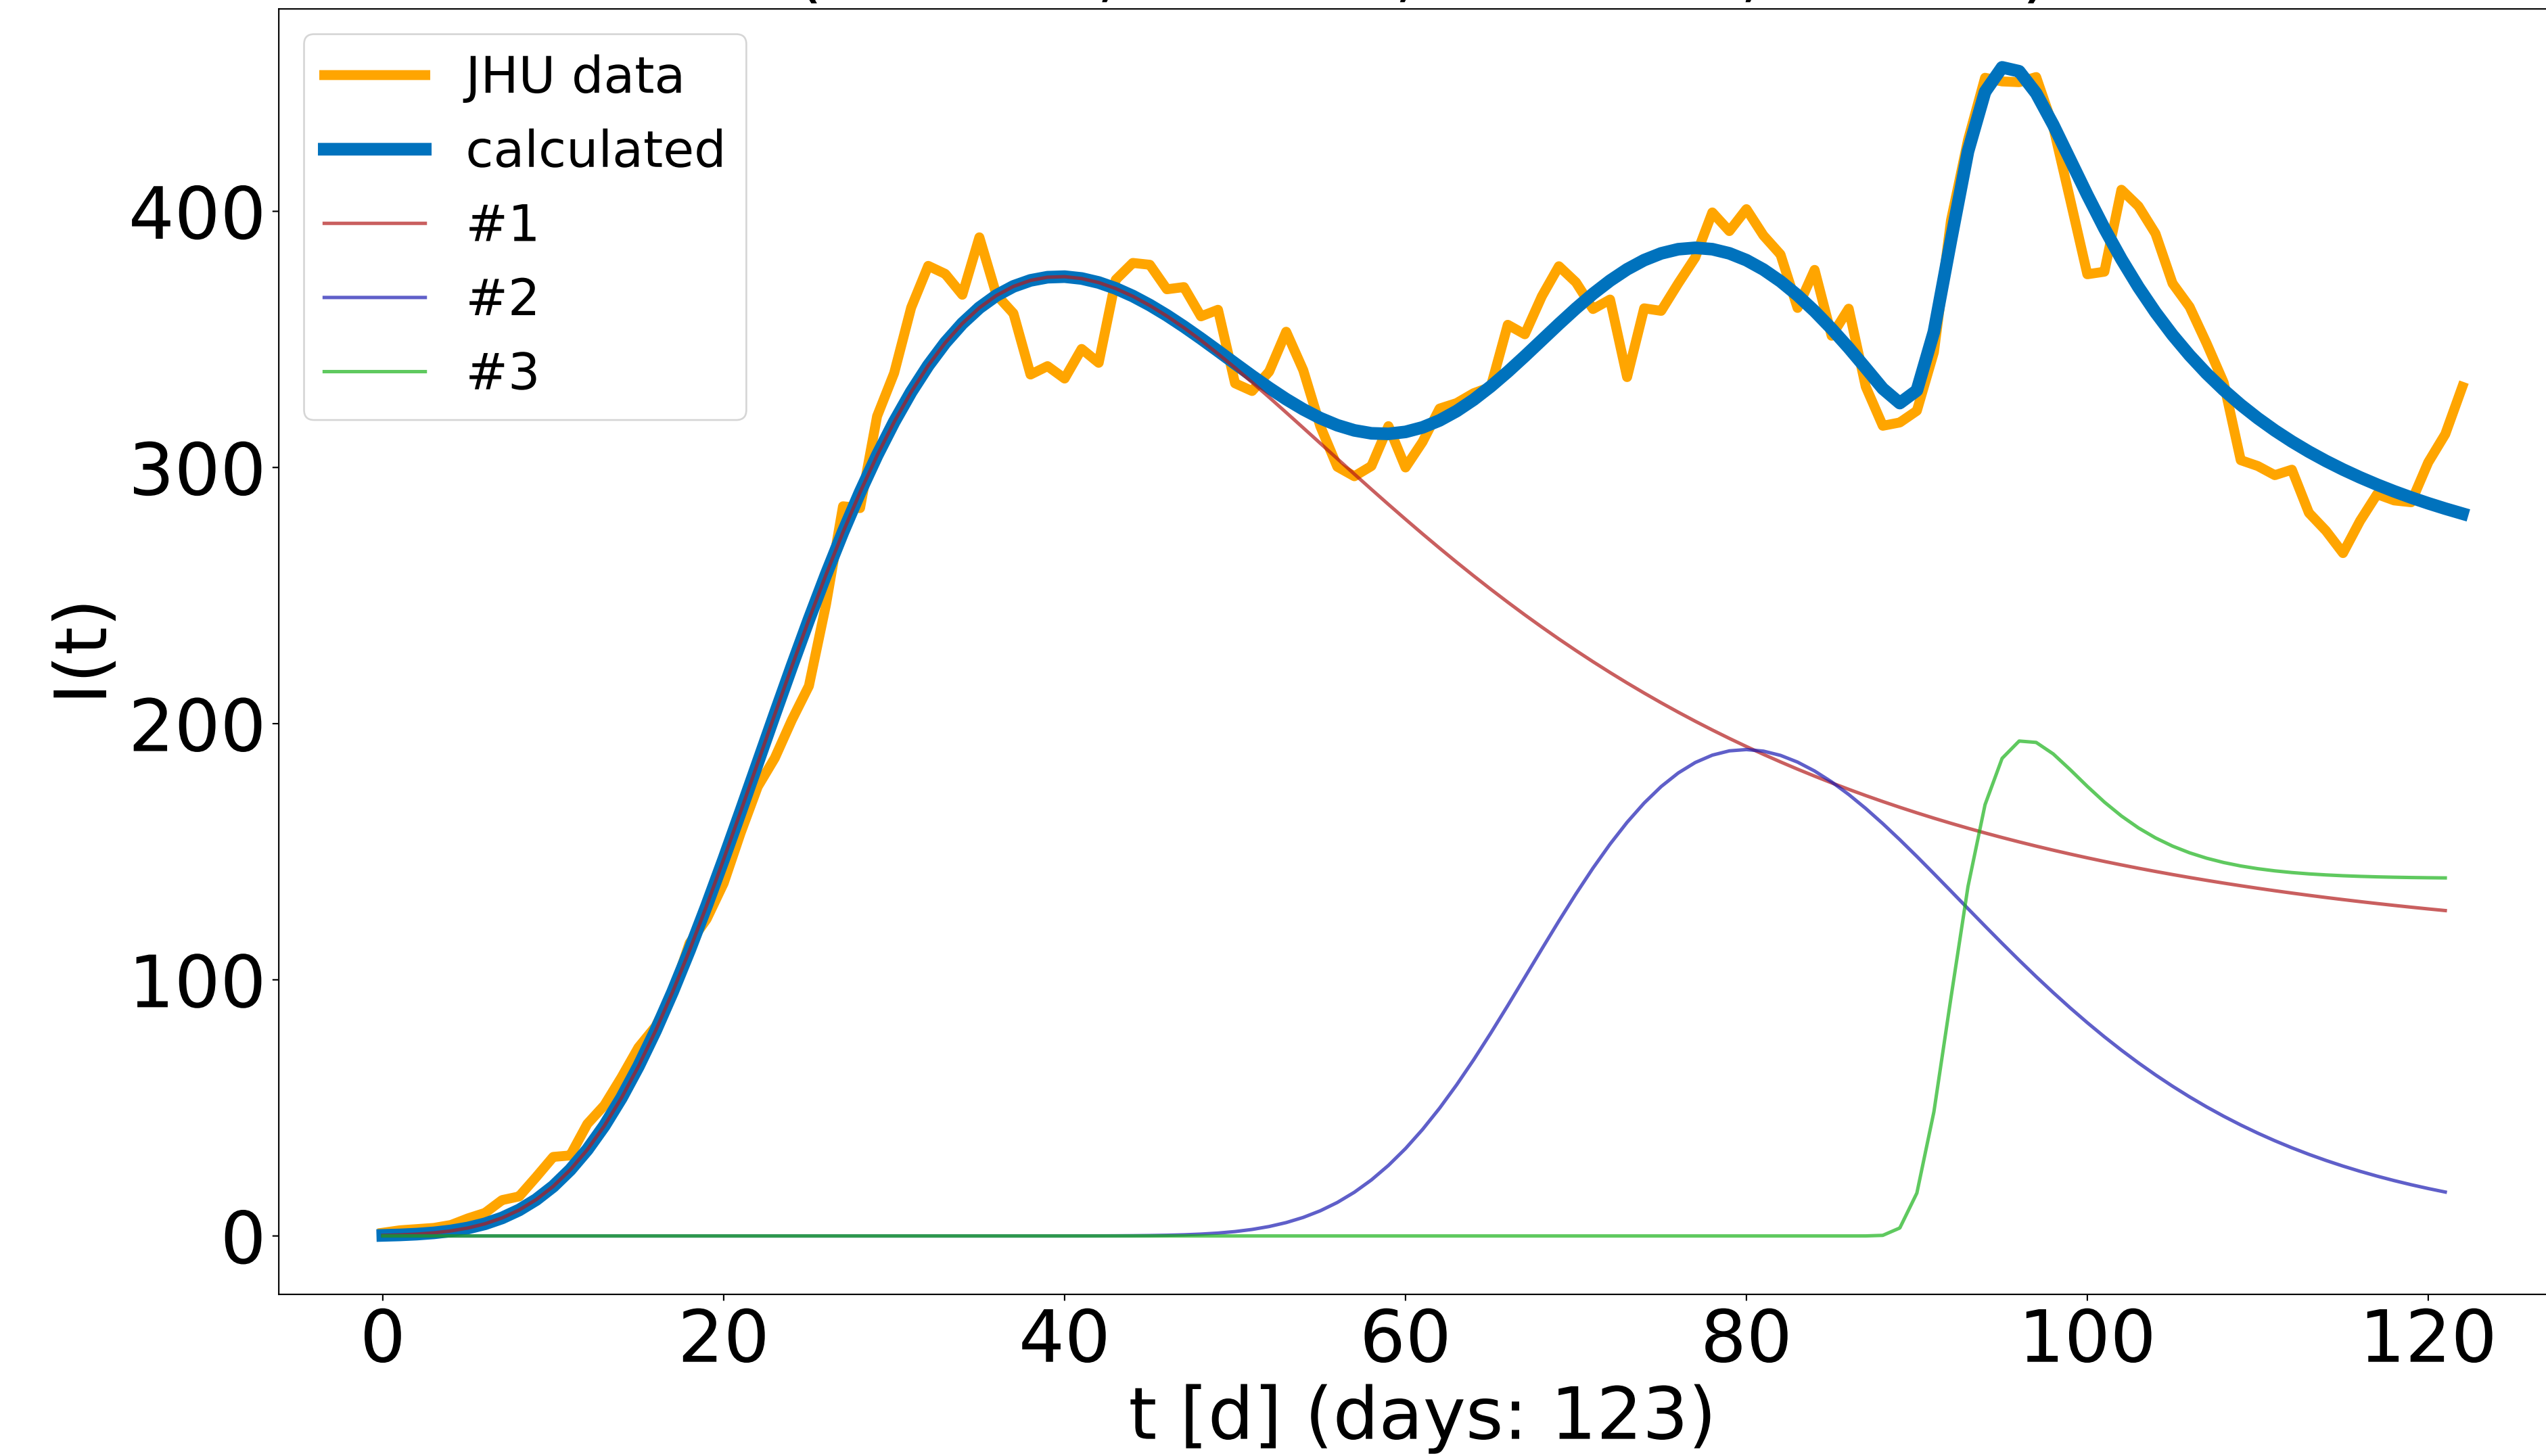



Serbia ( $R^2 = 0.857$ )  
 (i: 0.1, a: 0.625, b: 0.029, t: 2.9)  
 (i: 46.2, a: 1.679, b: 0.45, t: 37.2)  
 (i: 0.1, a: 0.674, b: 0.031, t: 92.5)

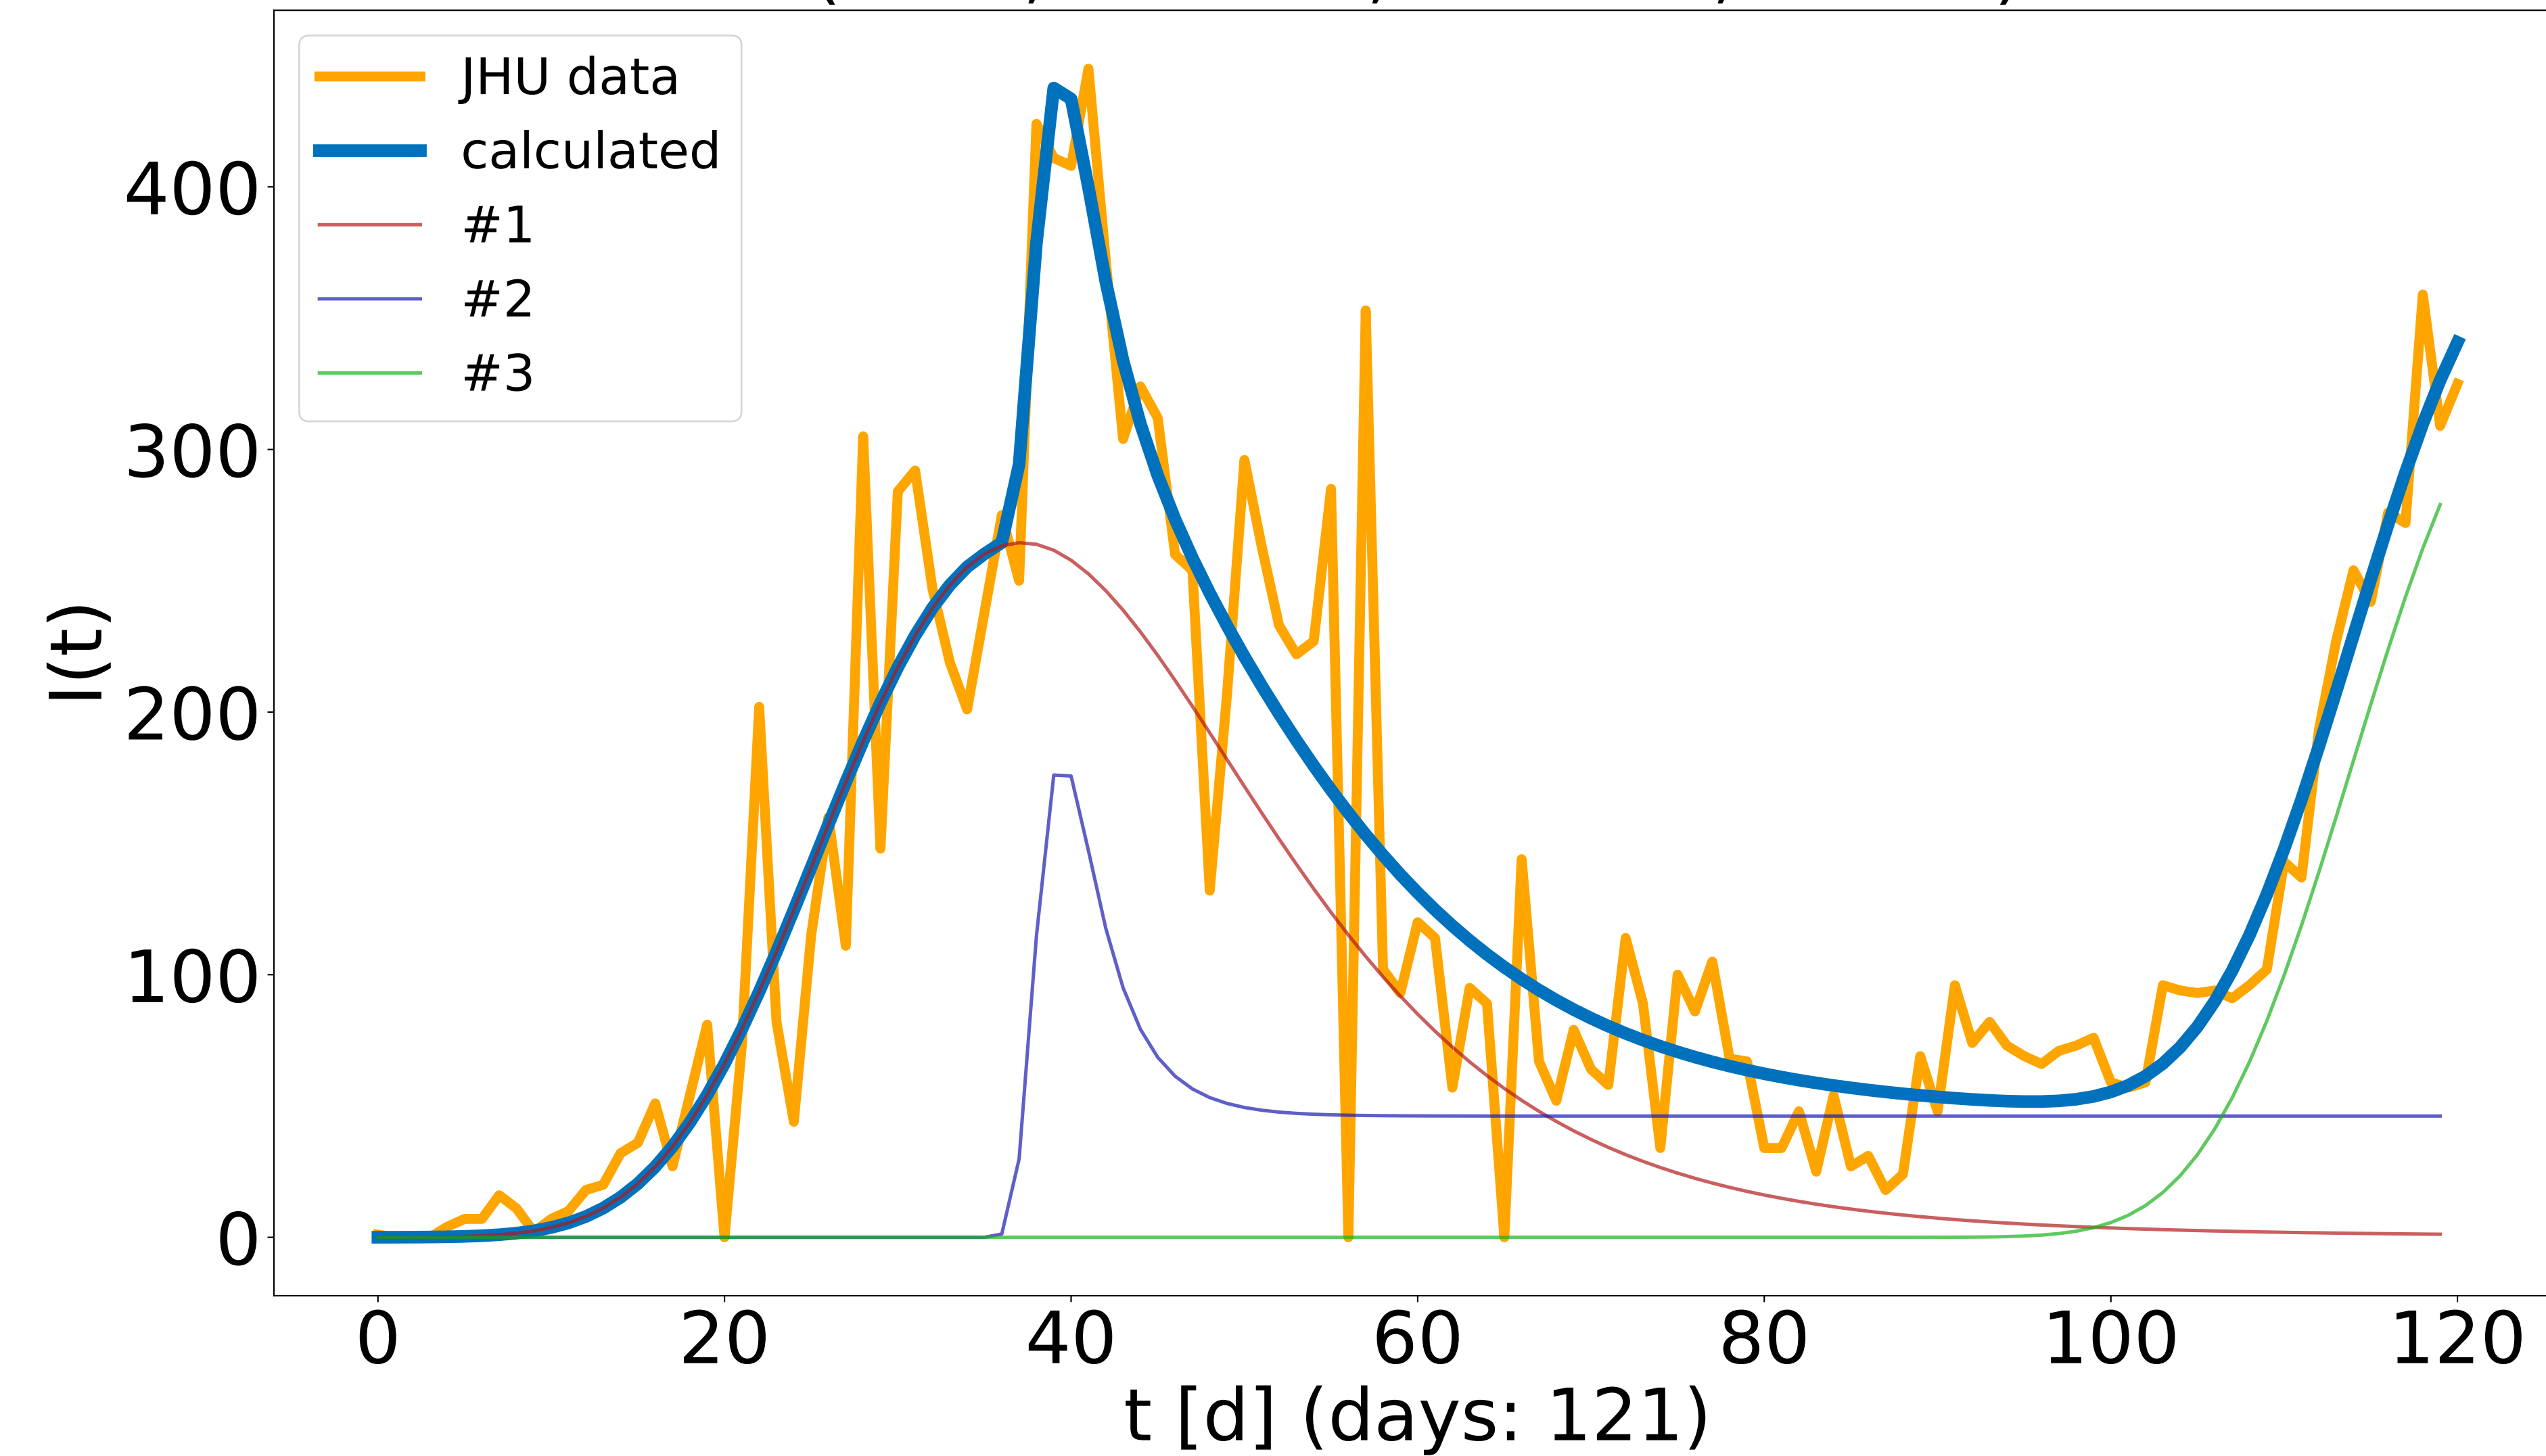

Serbia ( $R^2 = 0.98$ )  
 (i: 0.1, a: 0.617, b: 0.029, t: 2.6)  
 (i: 40.4, a: 0.863, b: 0.298, t: 36.8)  
 (i: 0.1, a: 0.446, b: 0.019, t: 83.8)

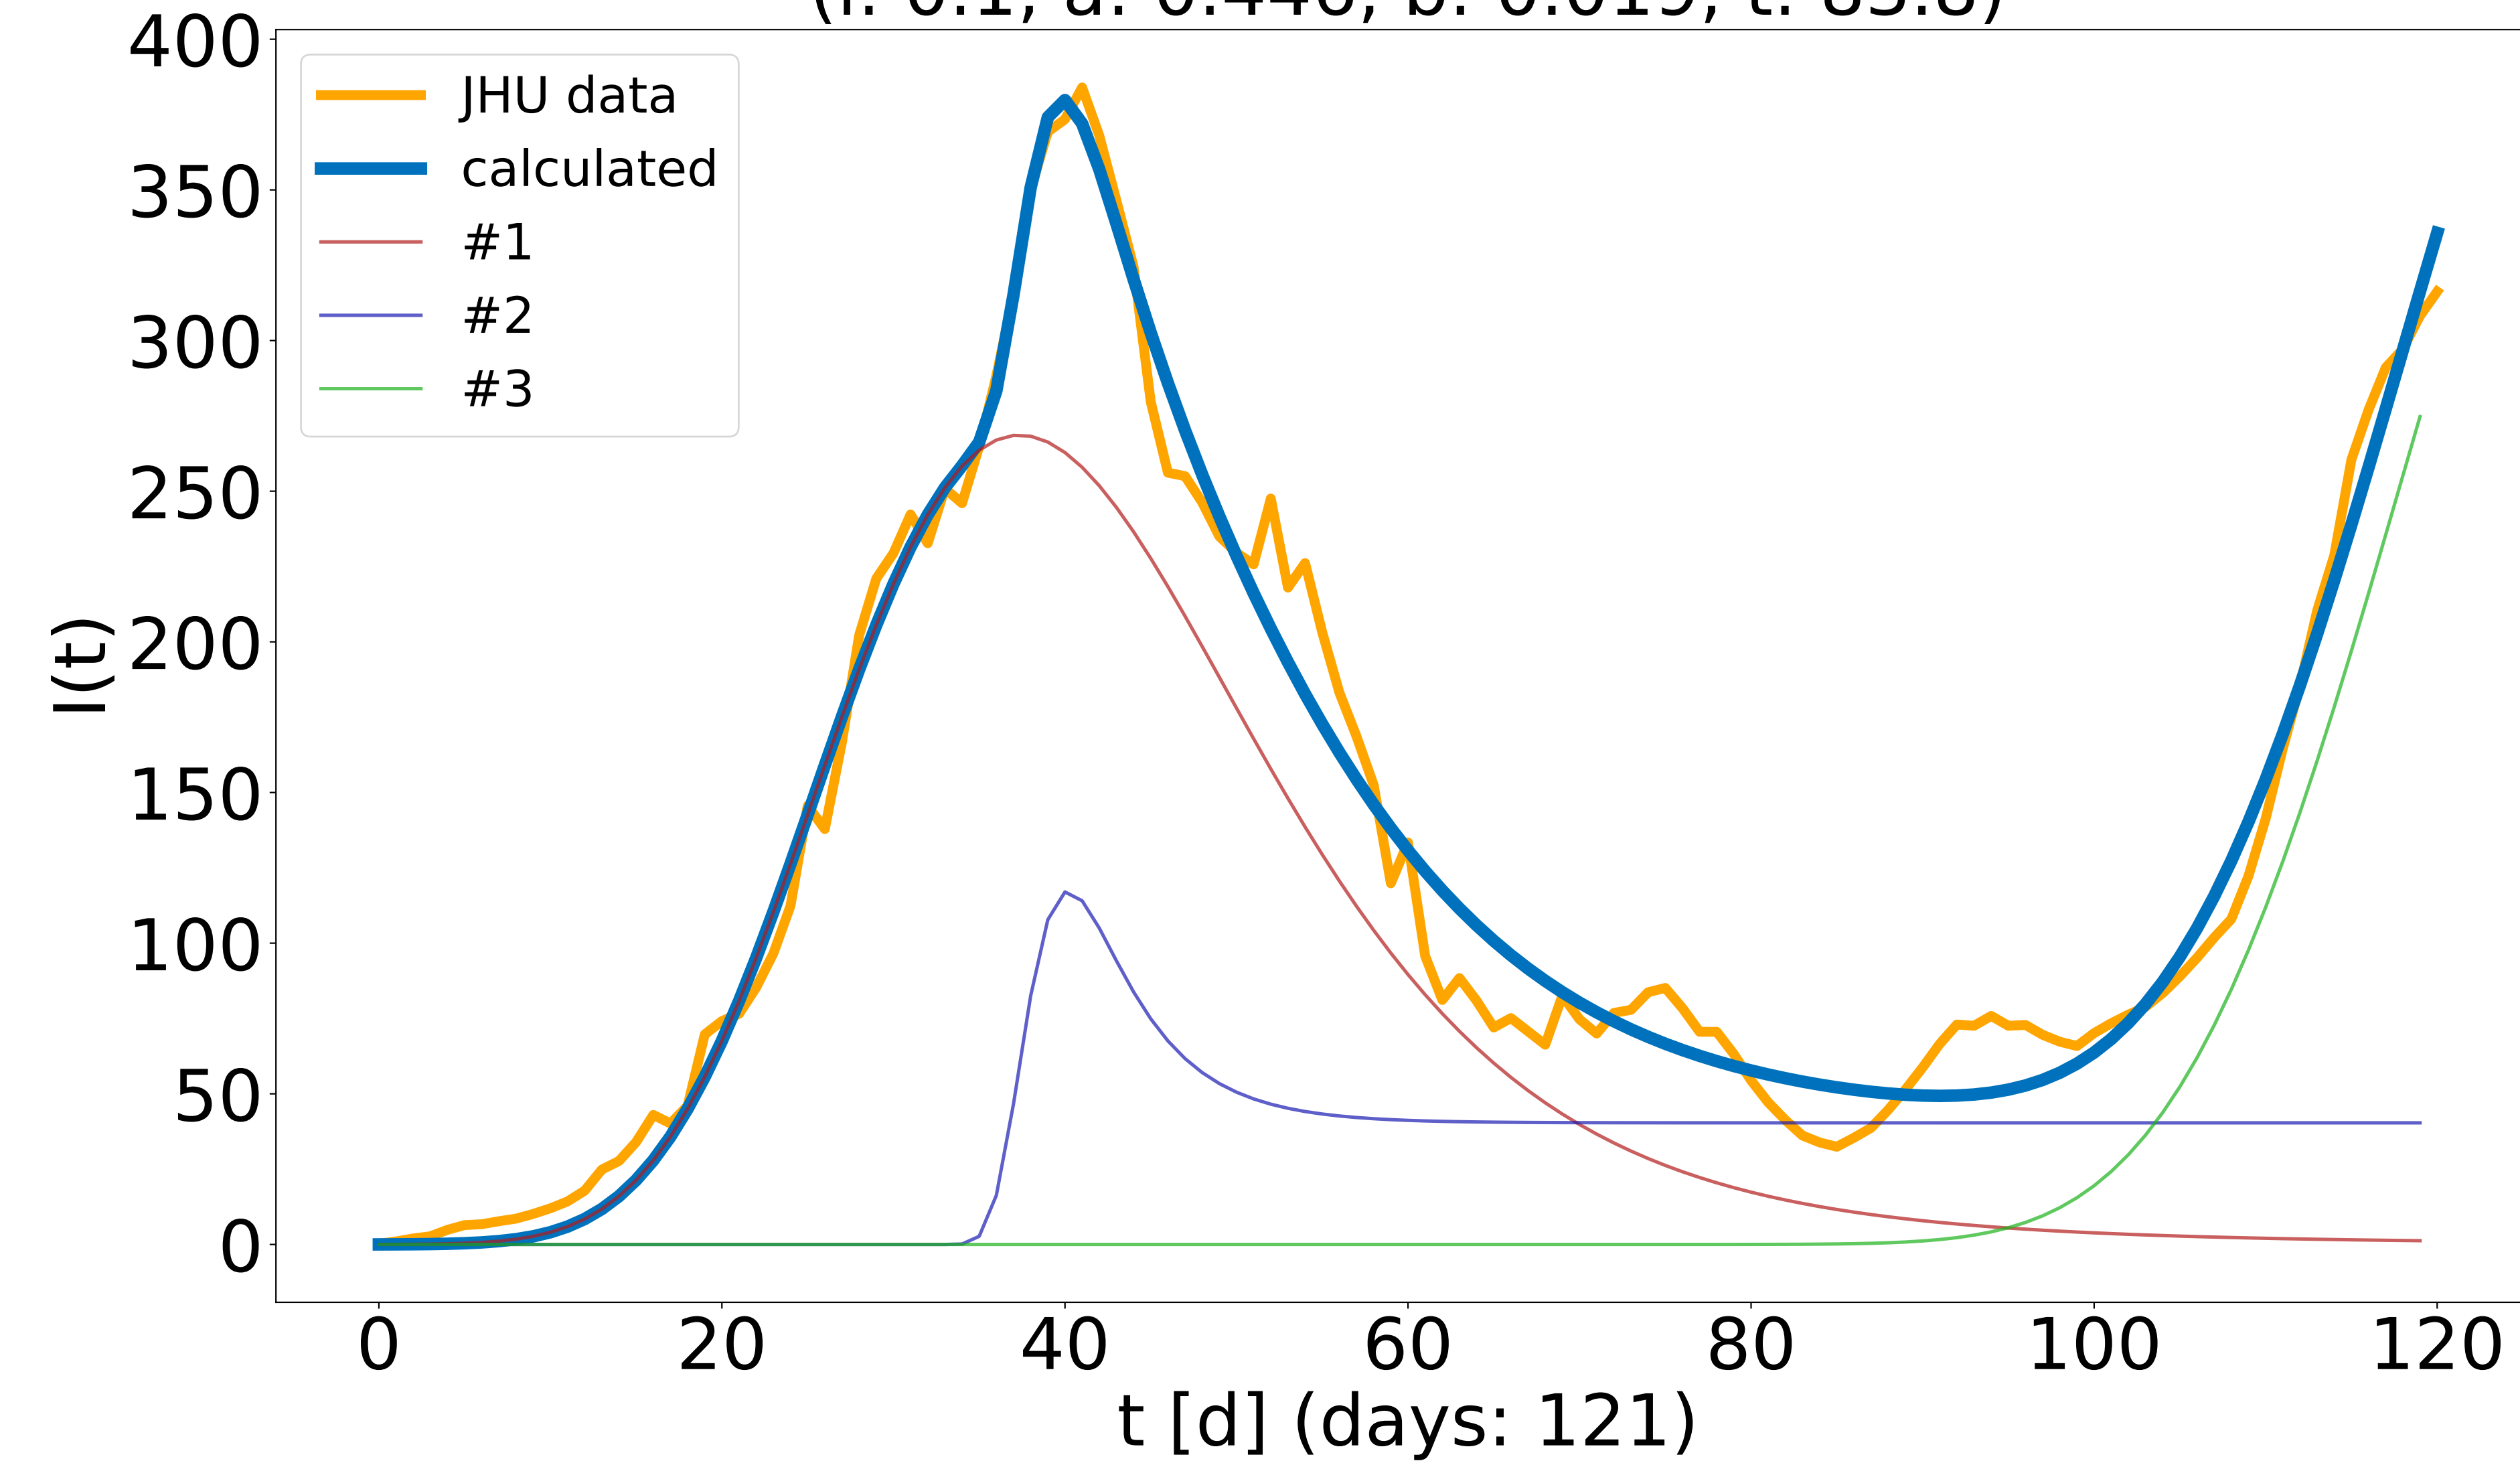

Sri Lanka ( $R^2 = 0.319$ )  
(i: 0.1, a: 1.366, b: 0.108, t: 41.8)  
(i: 0.1, a: 0.264, b: 0.017, t: 48.4)  
(i: 0.1, a: 0.689, b: 1.4, t: 140.0)

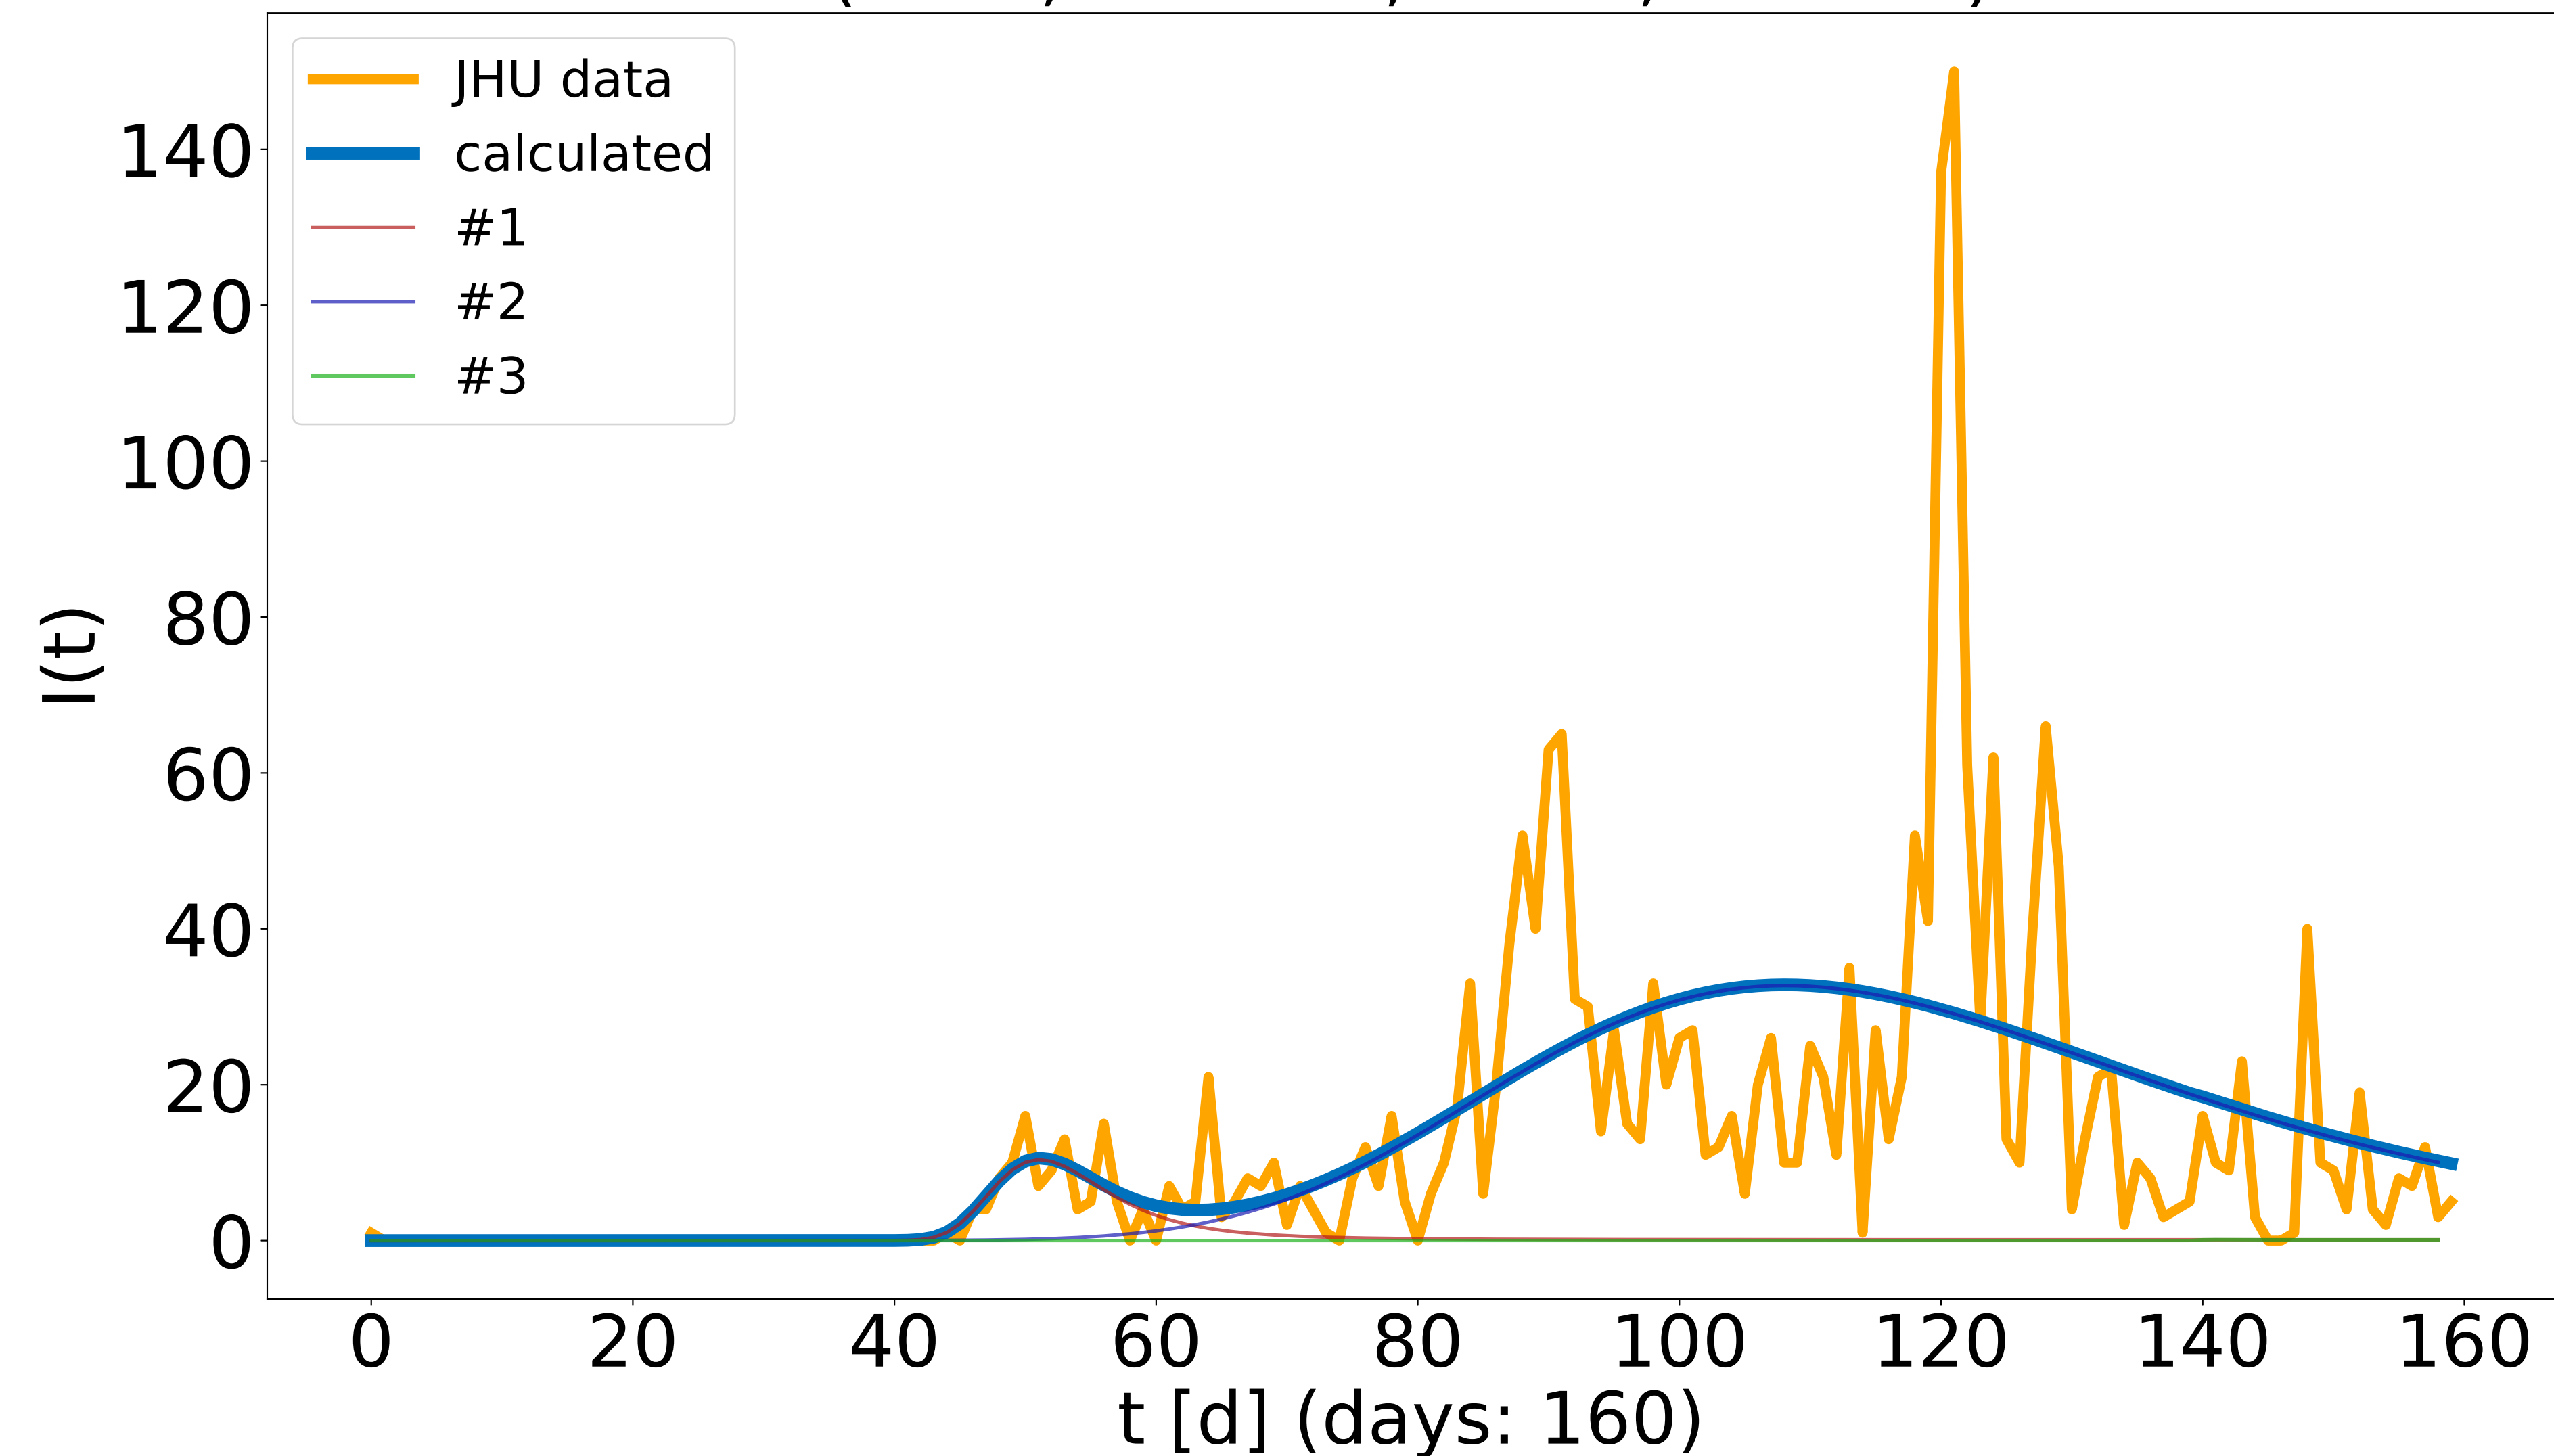

Sri Lanka ( $R^2 = 0.976$ )  
(i: 6.3, a: 0.323, b: 0.344, t: 47.0)  
(i: 3.3, a: 0.86, b: 0.133, t: 81.8)  
(i: 0.1, a: 1.887, b: 0.108, t: 111.3)

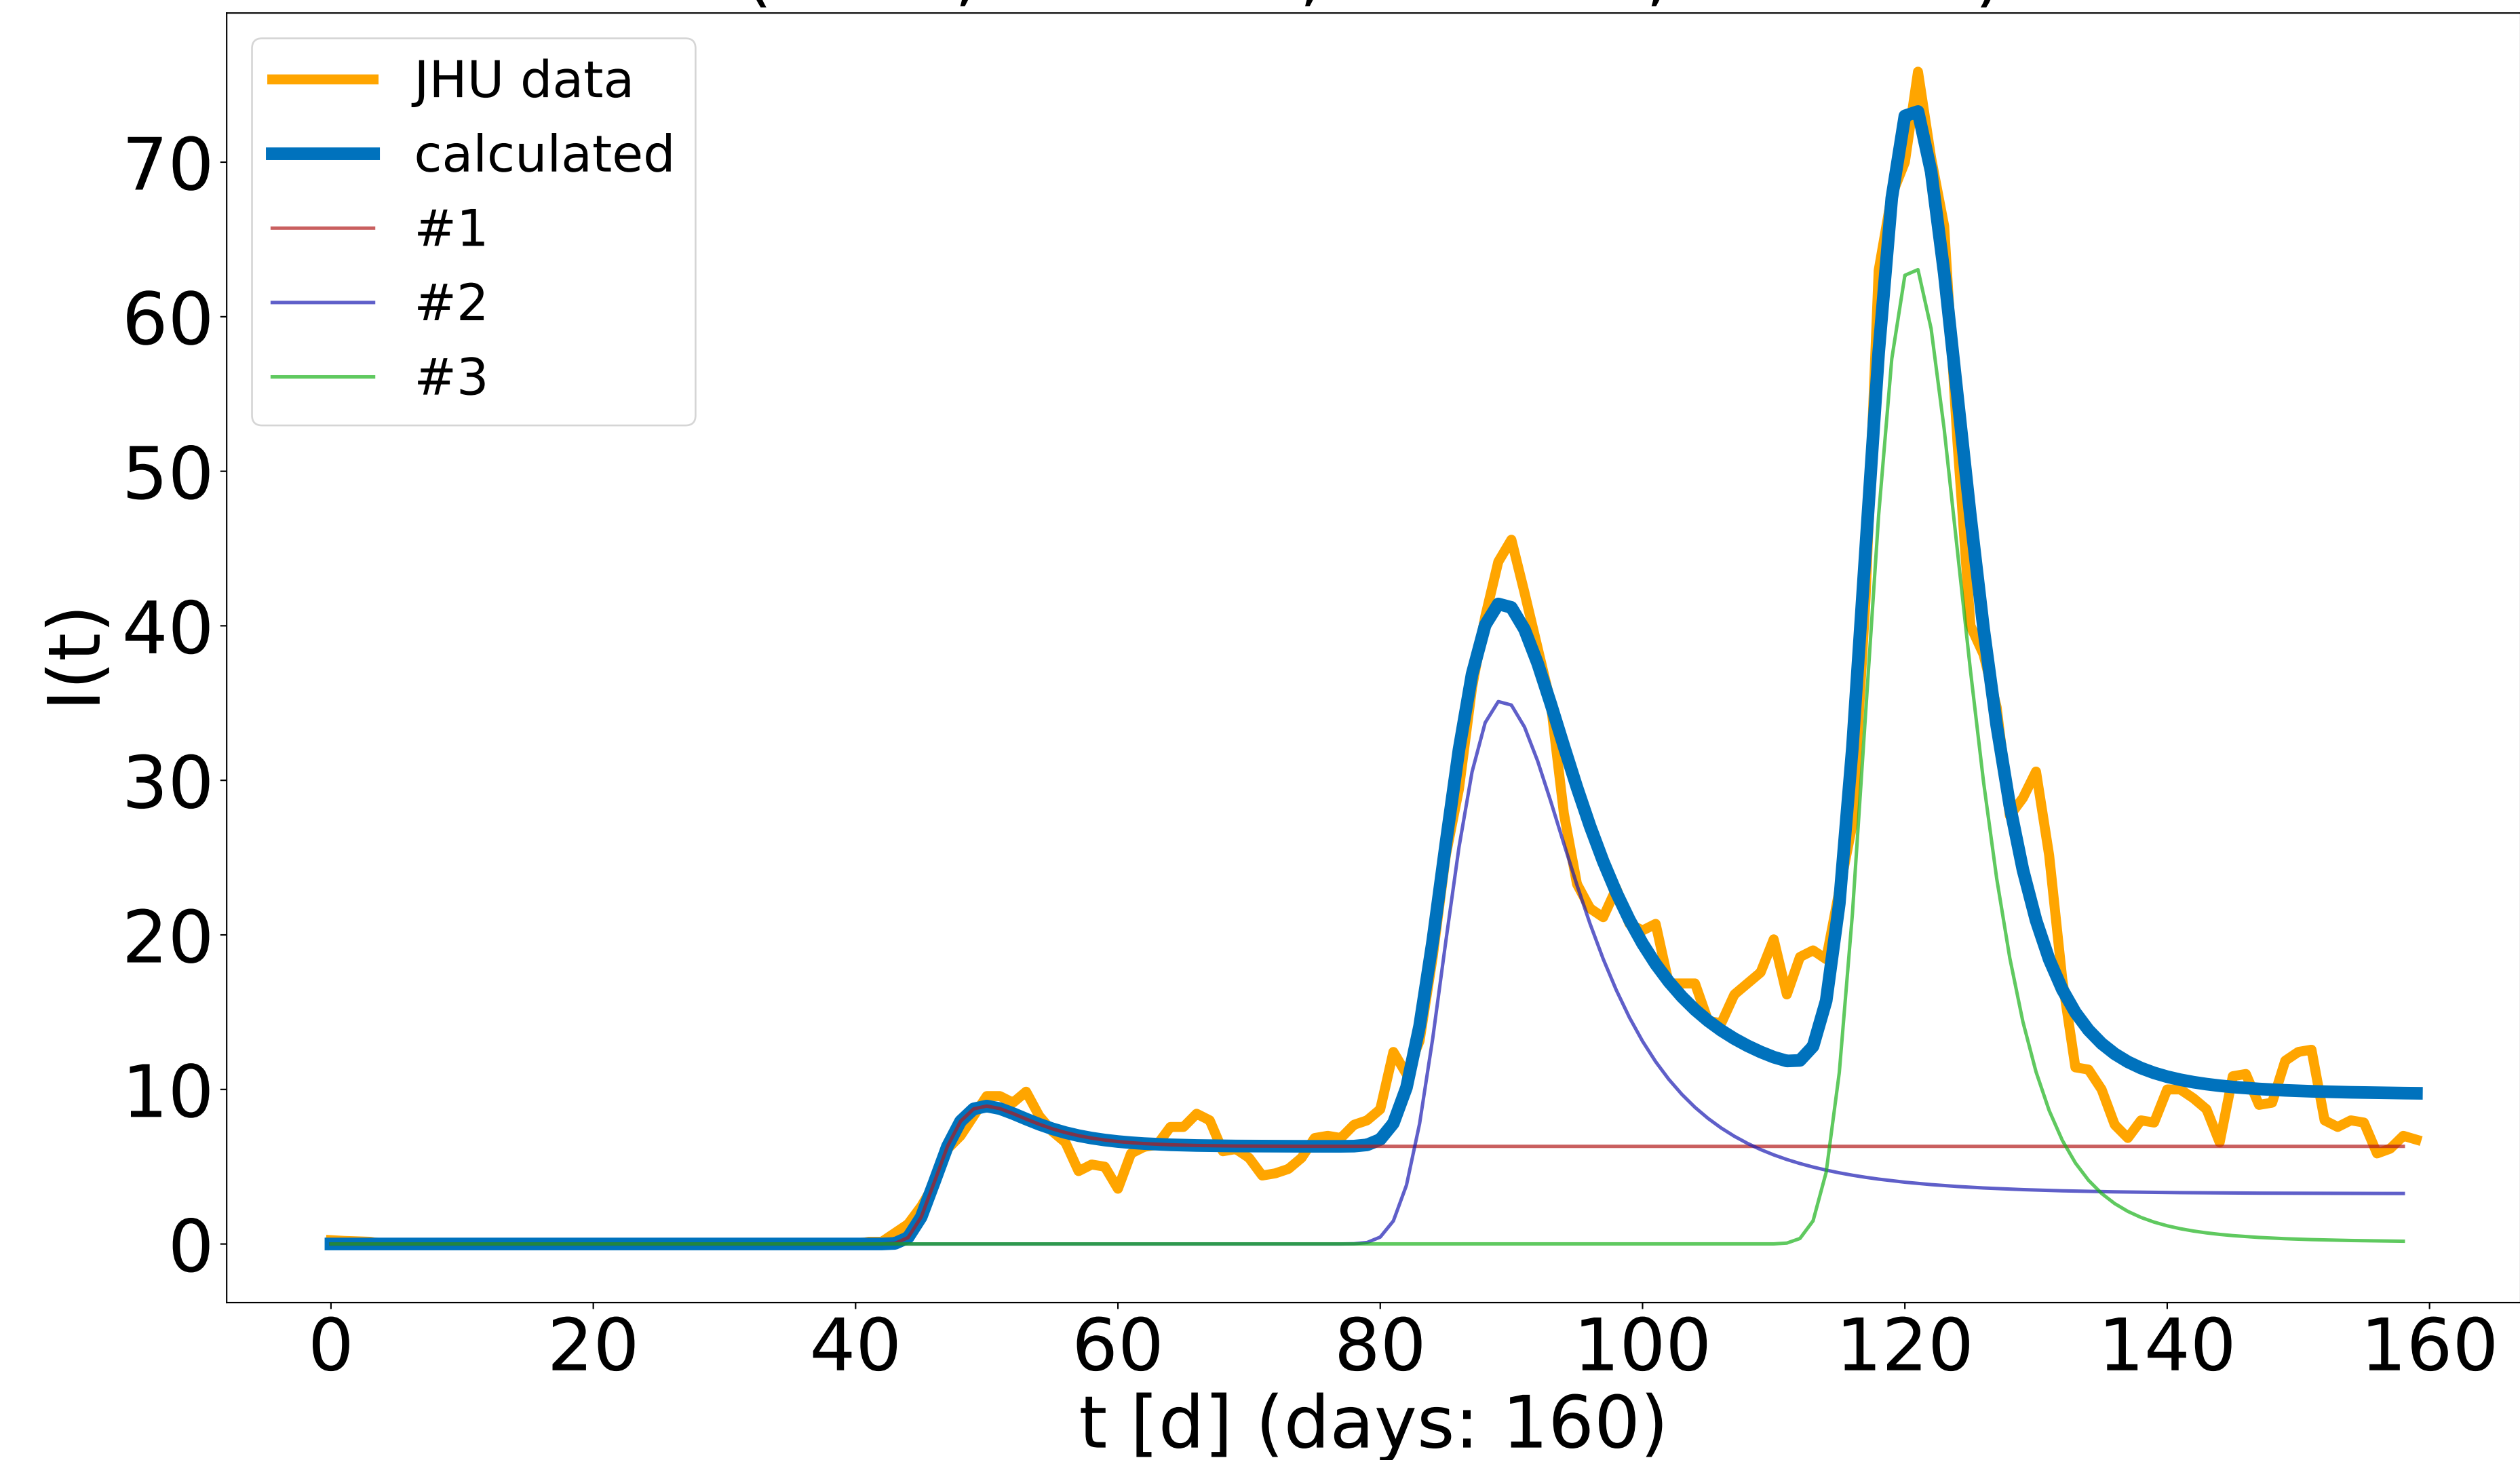

Tunisia ( $R^2 = 0.65$ )  
(i: 0.2, a: 0.87, b: 0.06, t: 9.0)  
(i: 2.2, a: 2.0, b: 0.316, t: 39.4)  
(i: 0.8, a: 2.0, b: 0.323, t: 100.9)

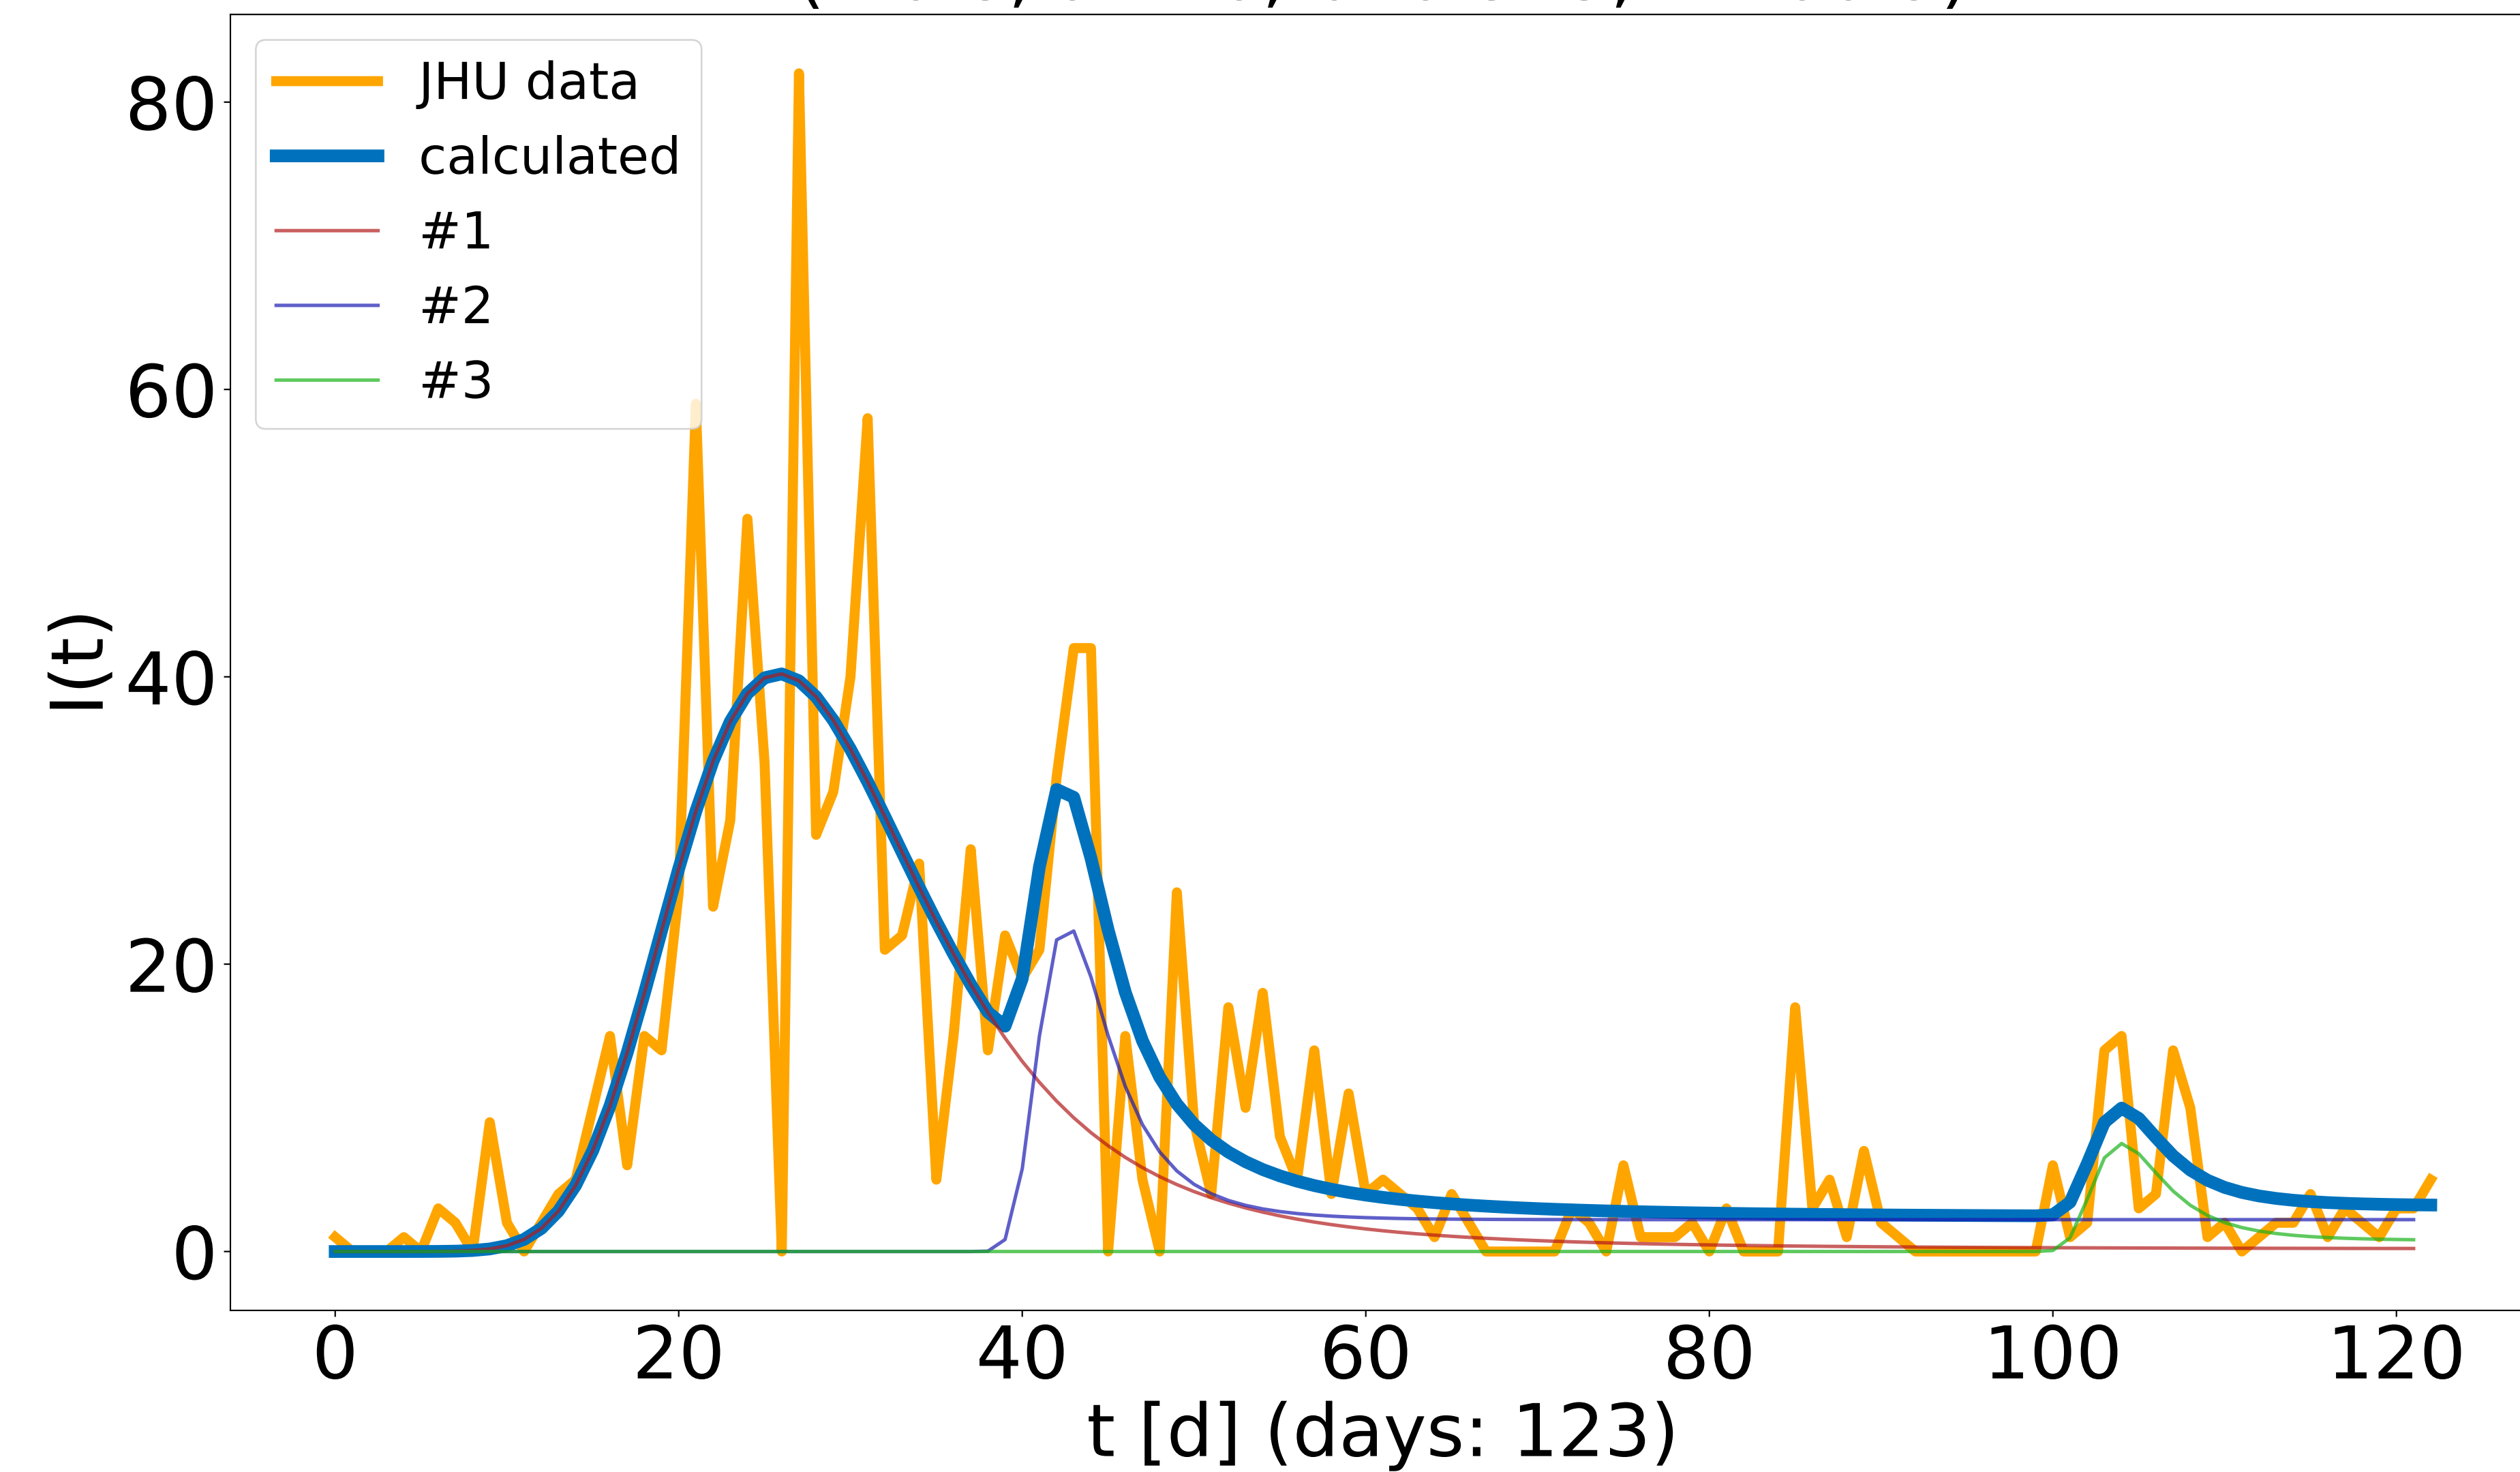

Tunisia ( $R^2 = 0.972$ )  
(i: 0.1, a: 0.875, b: 0.054, t: 7.4)  
(i: 2.0, a: 1.021, b: 0.185, t: 37.3)  
(i: 0.1, a: 2.0, b: 0.179, t: 98.7)

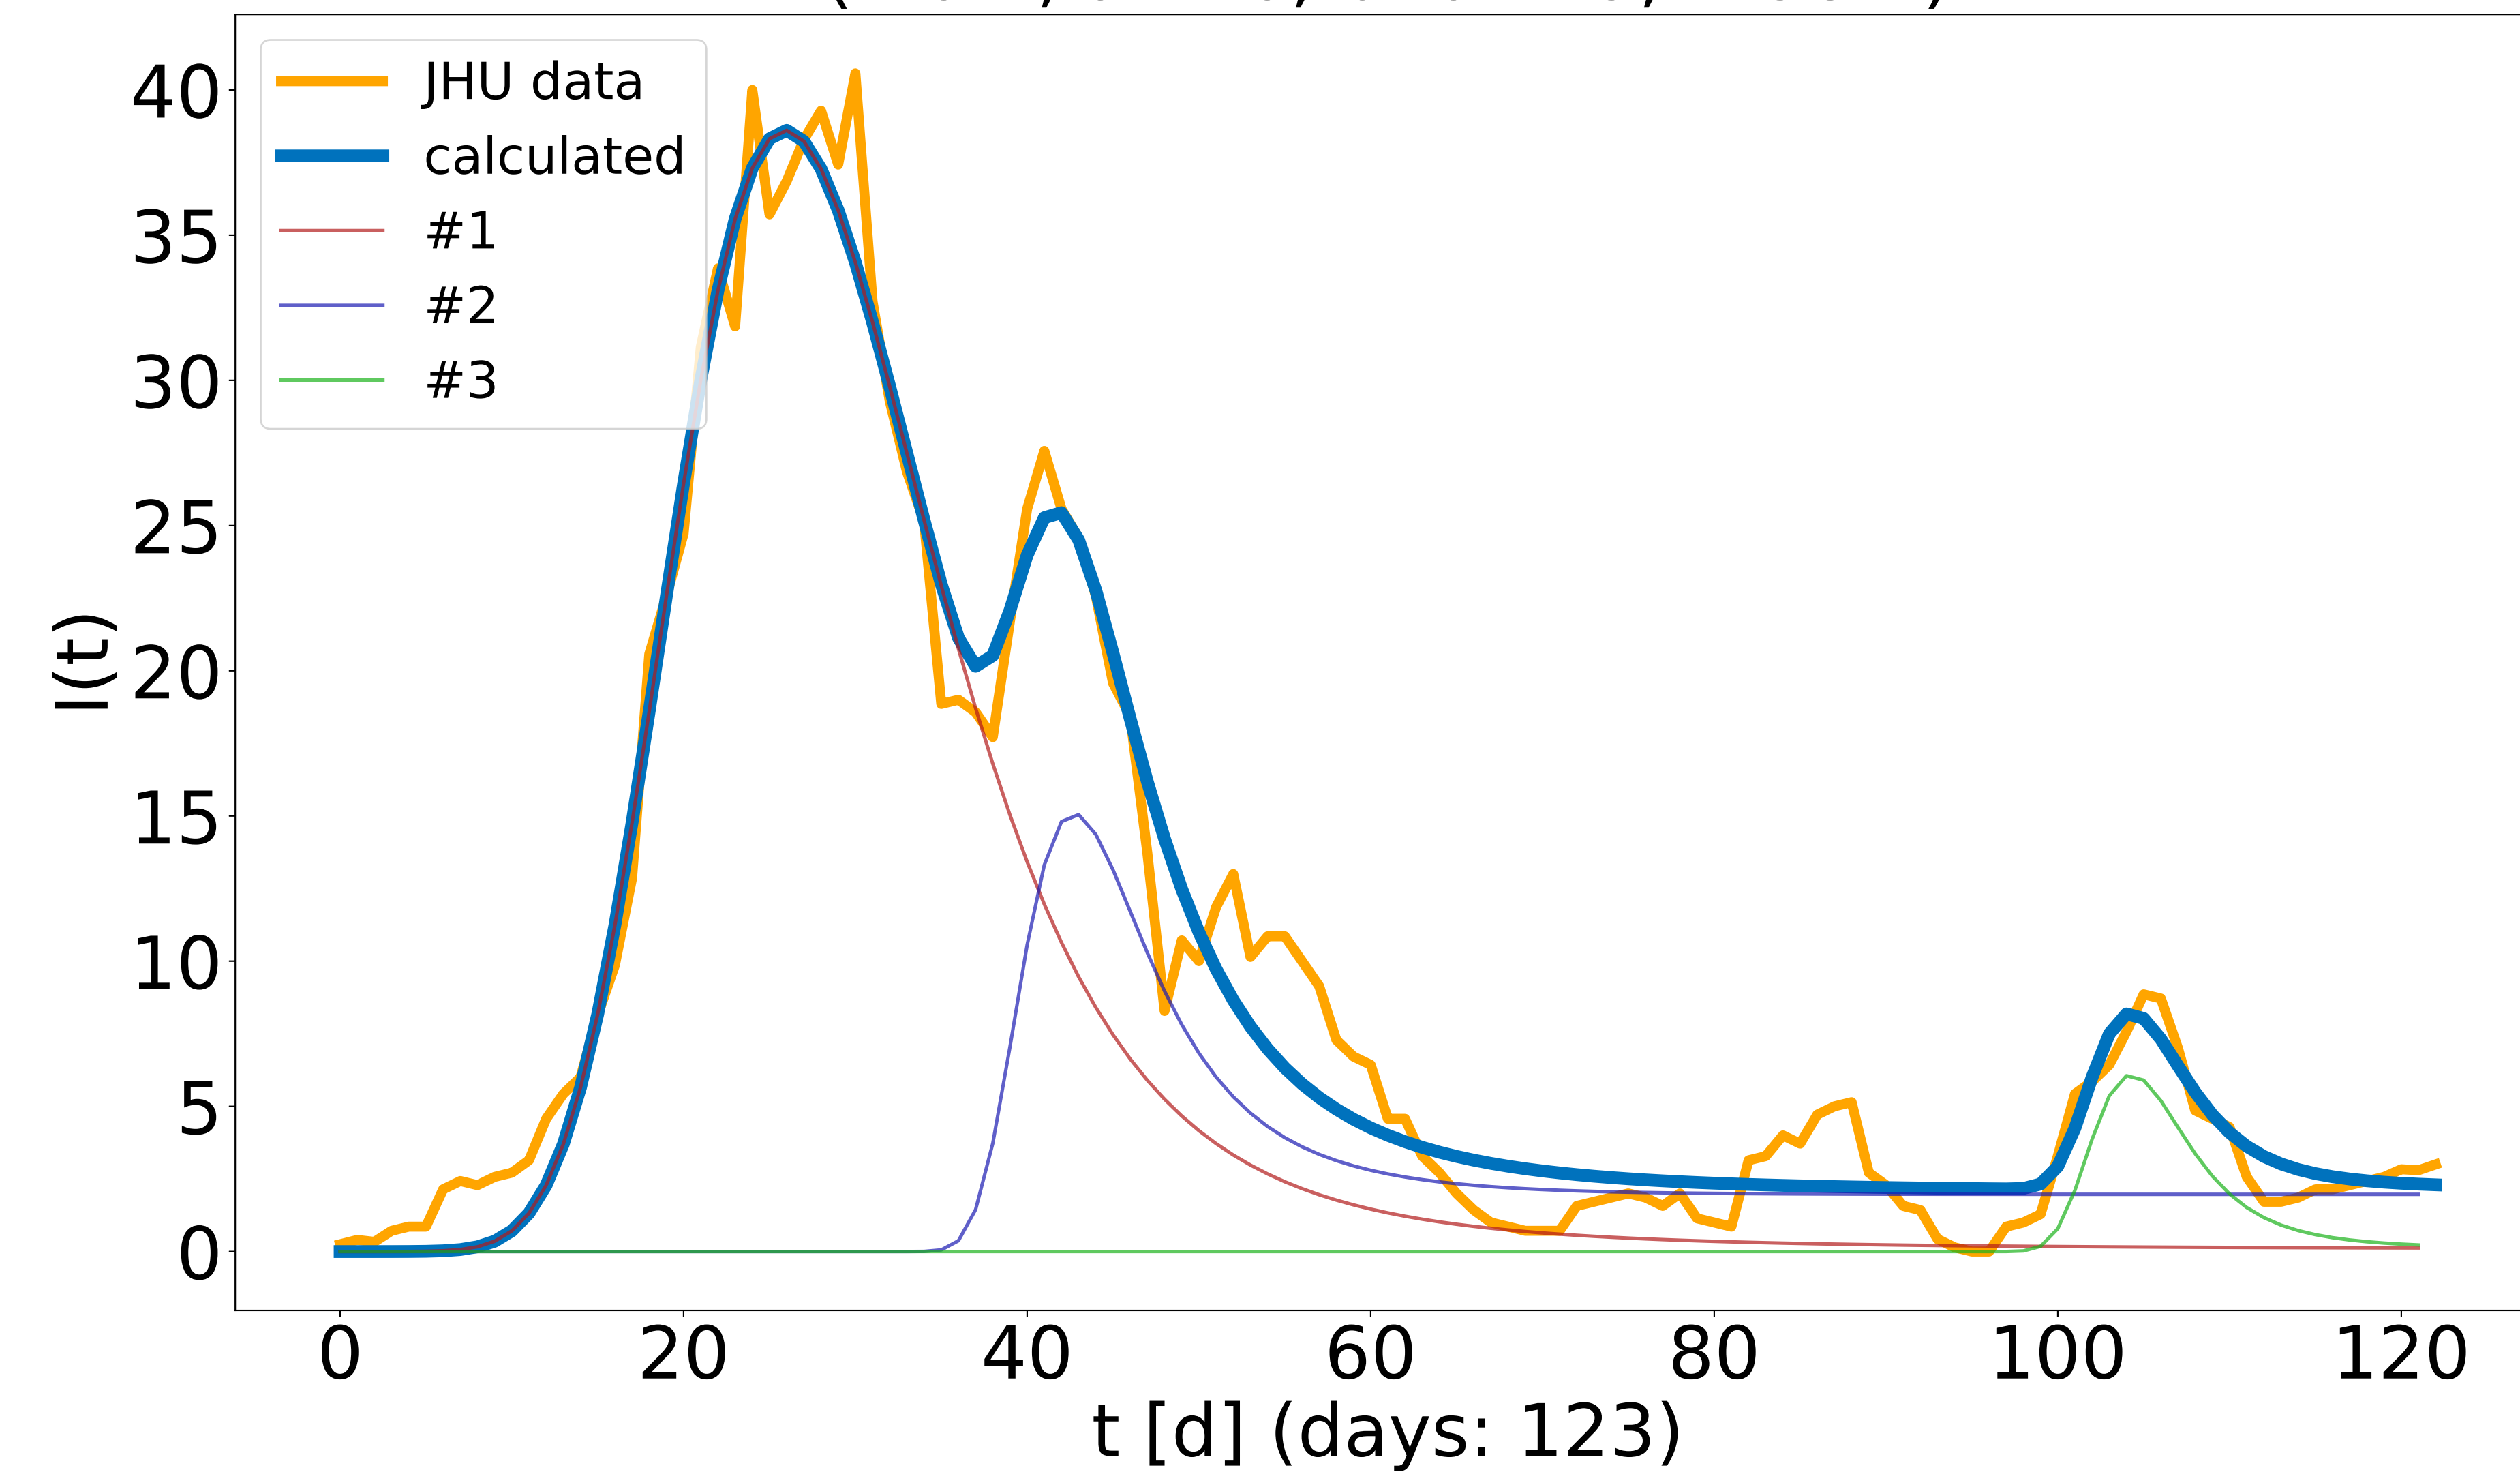

United Arab Emirates ( $R^2 = 0.963$ )  
(i: 304.7, a: 0.064, b: 0.044, t: 70.7)  
(i: 0.4, a: 0.79, b: 0.042, t: 89.6)  
(i: 0.1, a: 0.492, b: 0.001, t: 140.0)

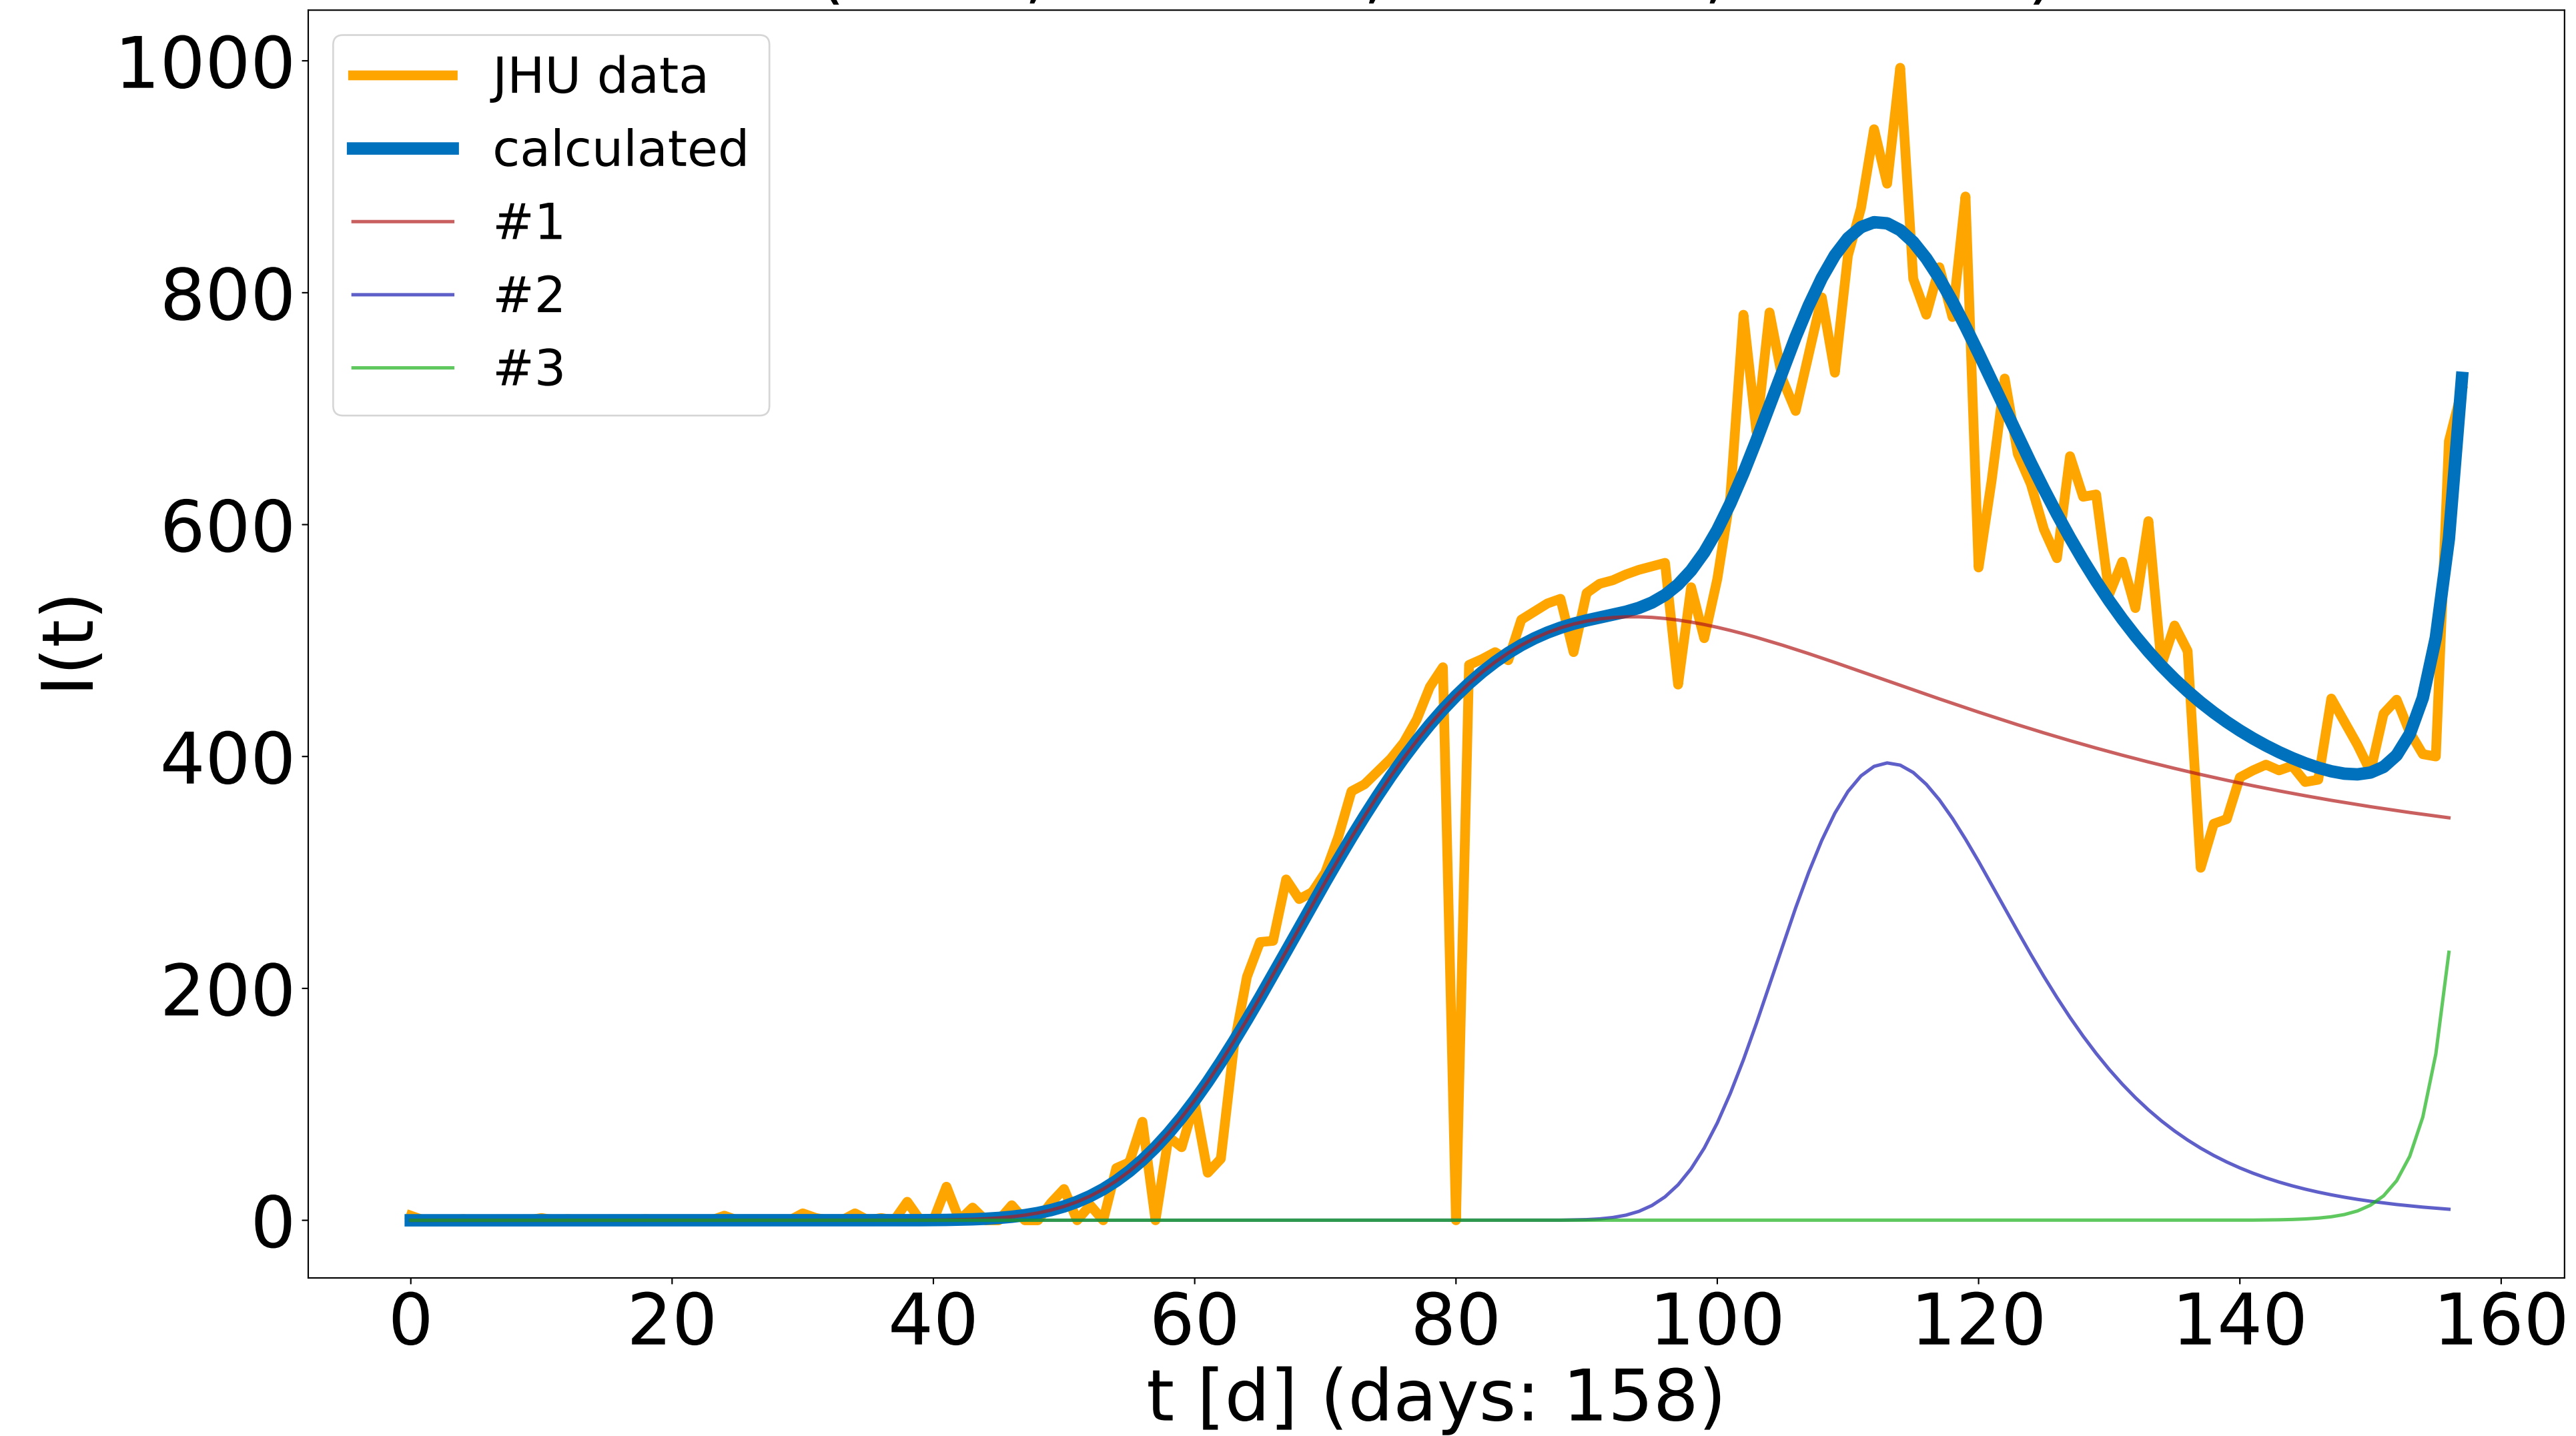

United Arab Emirates ( $R^2 = 0.989$ )  
(i: 0.1, a: 1.839, b: 0.102, t: 58.1)  
(i: 378.2, a: 0.044, b: 0.048, t: 76.5)  
(i: 0.1, a: 0.963, b: 0.043, t: 89.5)

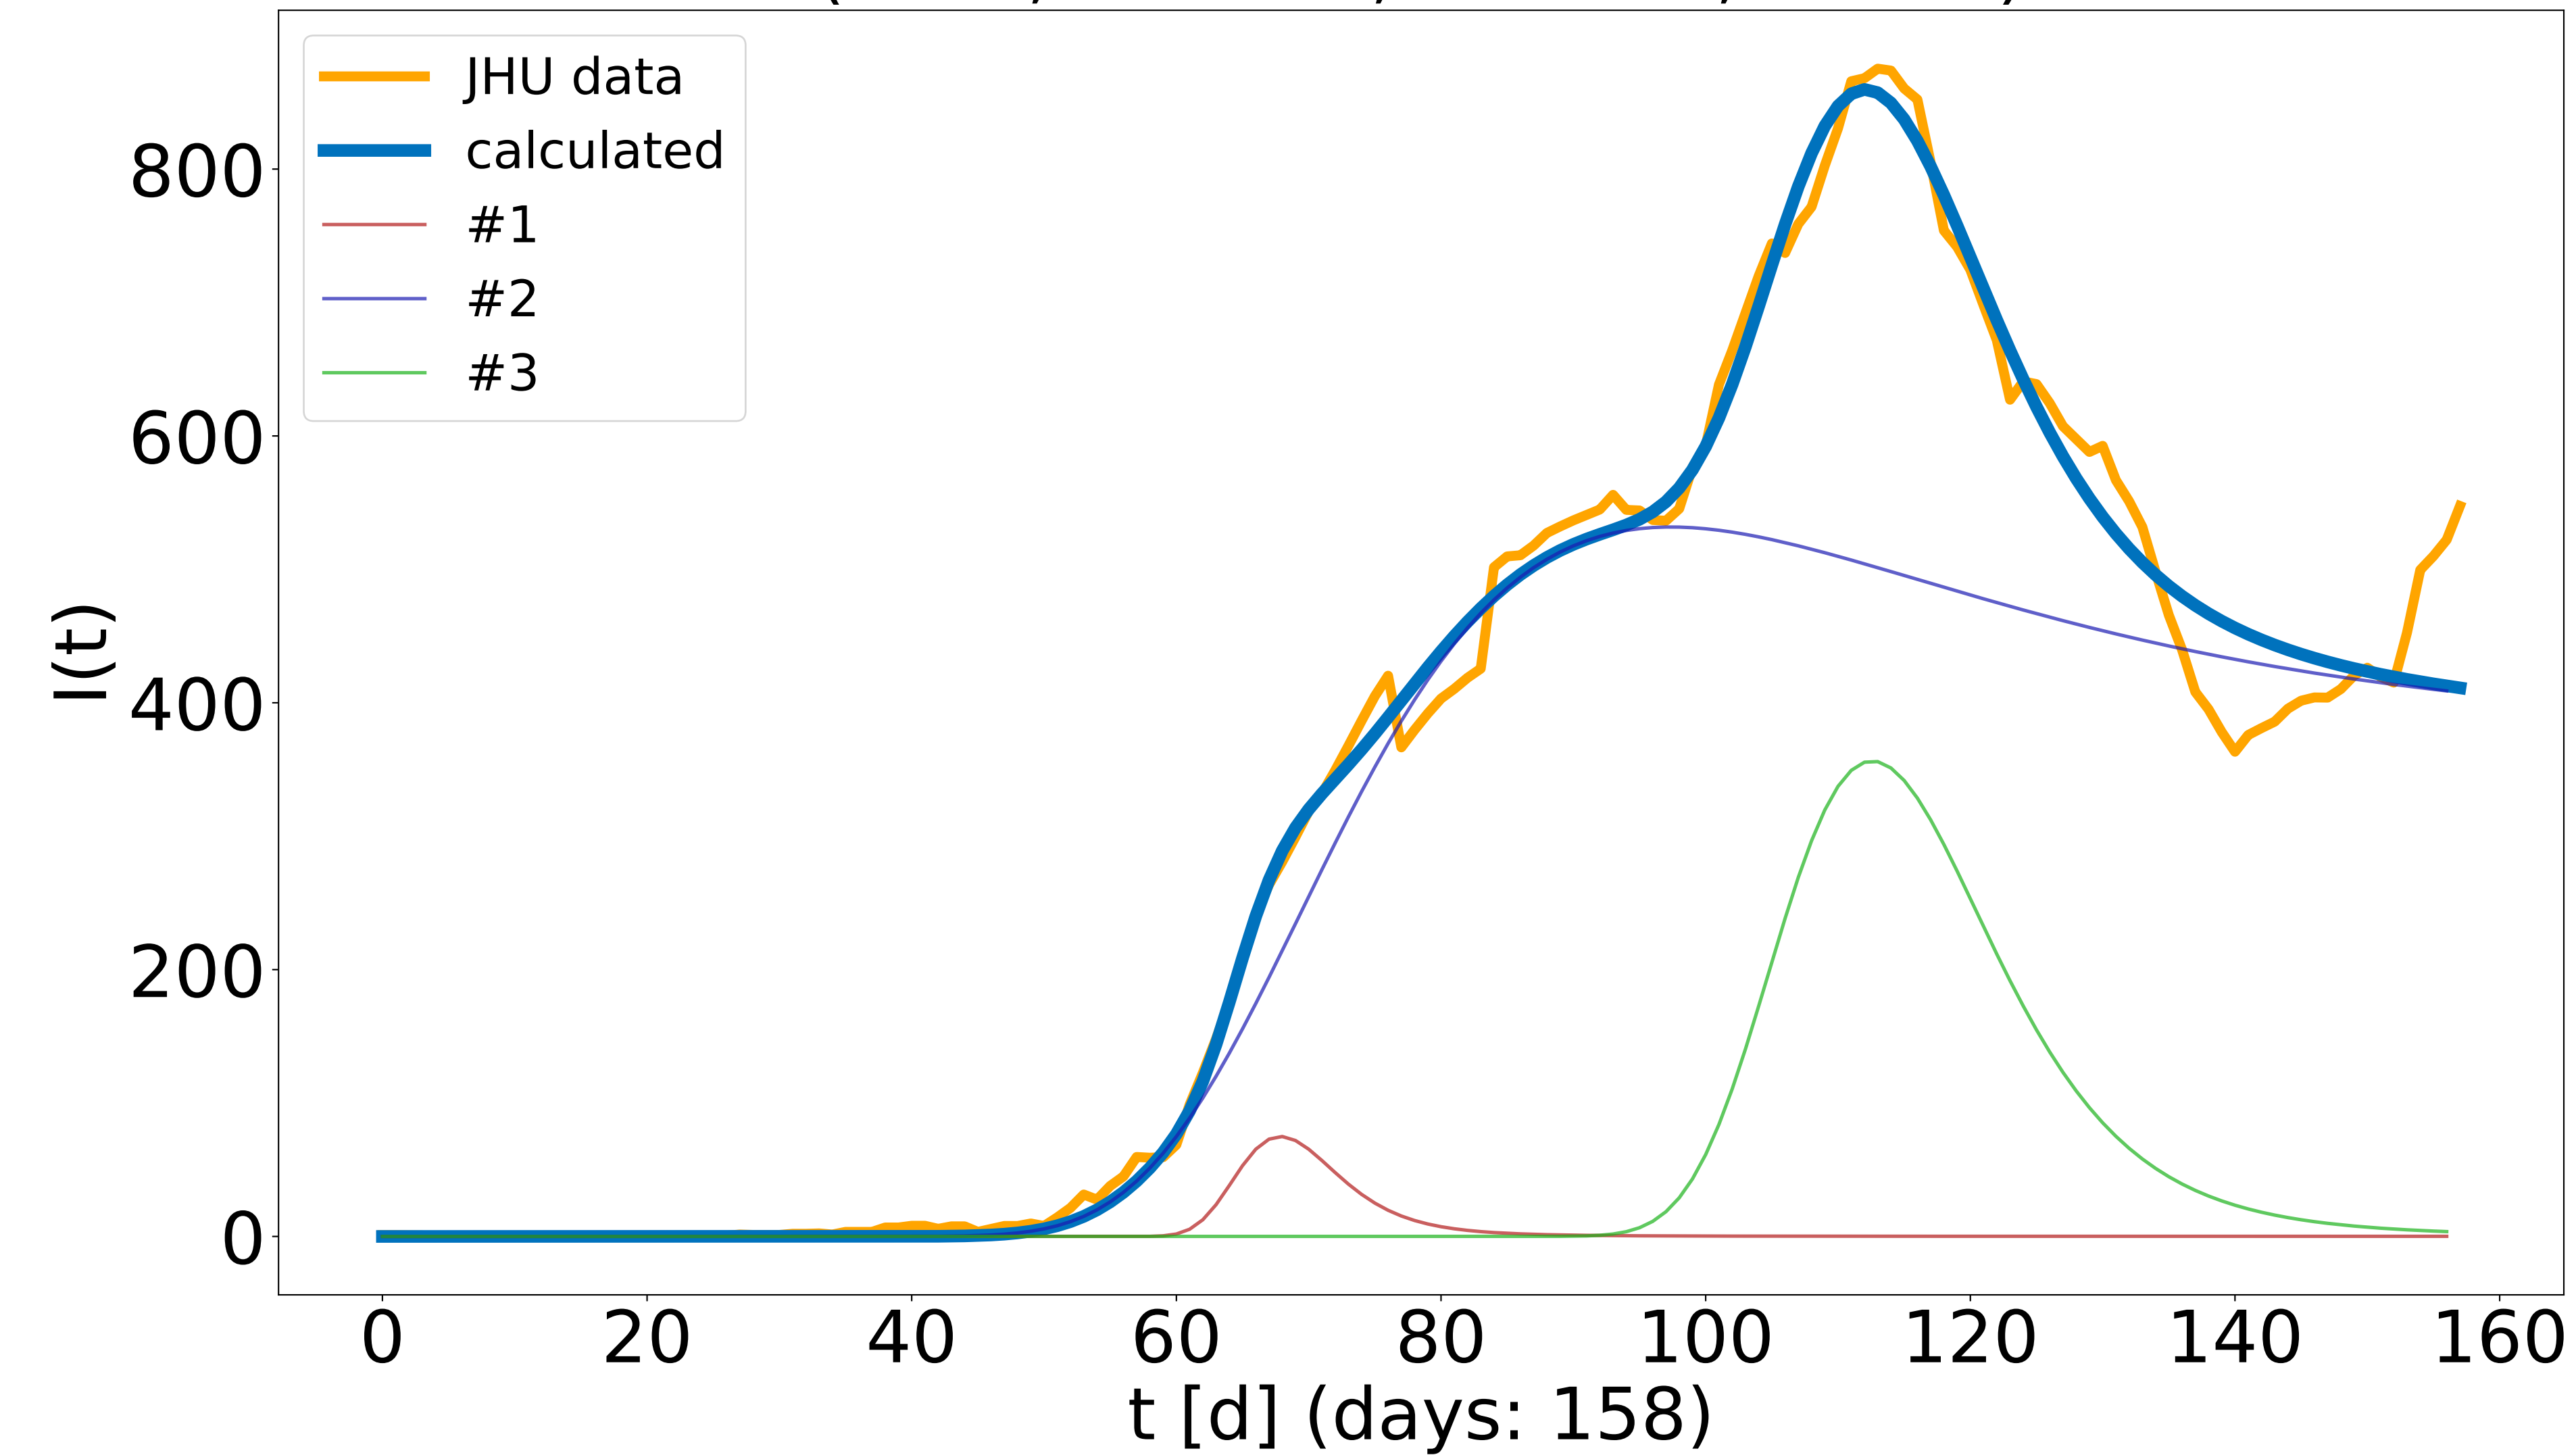



Madison, Alabama, US, Madison ( $R^2 = 0.763$ )  
(i: 2.9, a: 0.528, b: 0.148, t: 5.7)  
(i: 55.8, a: 2.0, b: 1.4, t: 108.3)  
(i: 31.4, a: 0.001, b: 0.138, t: 111.4)

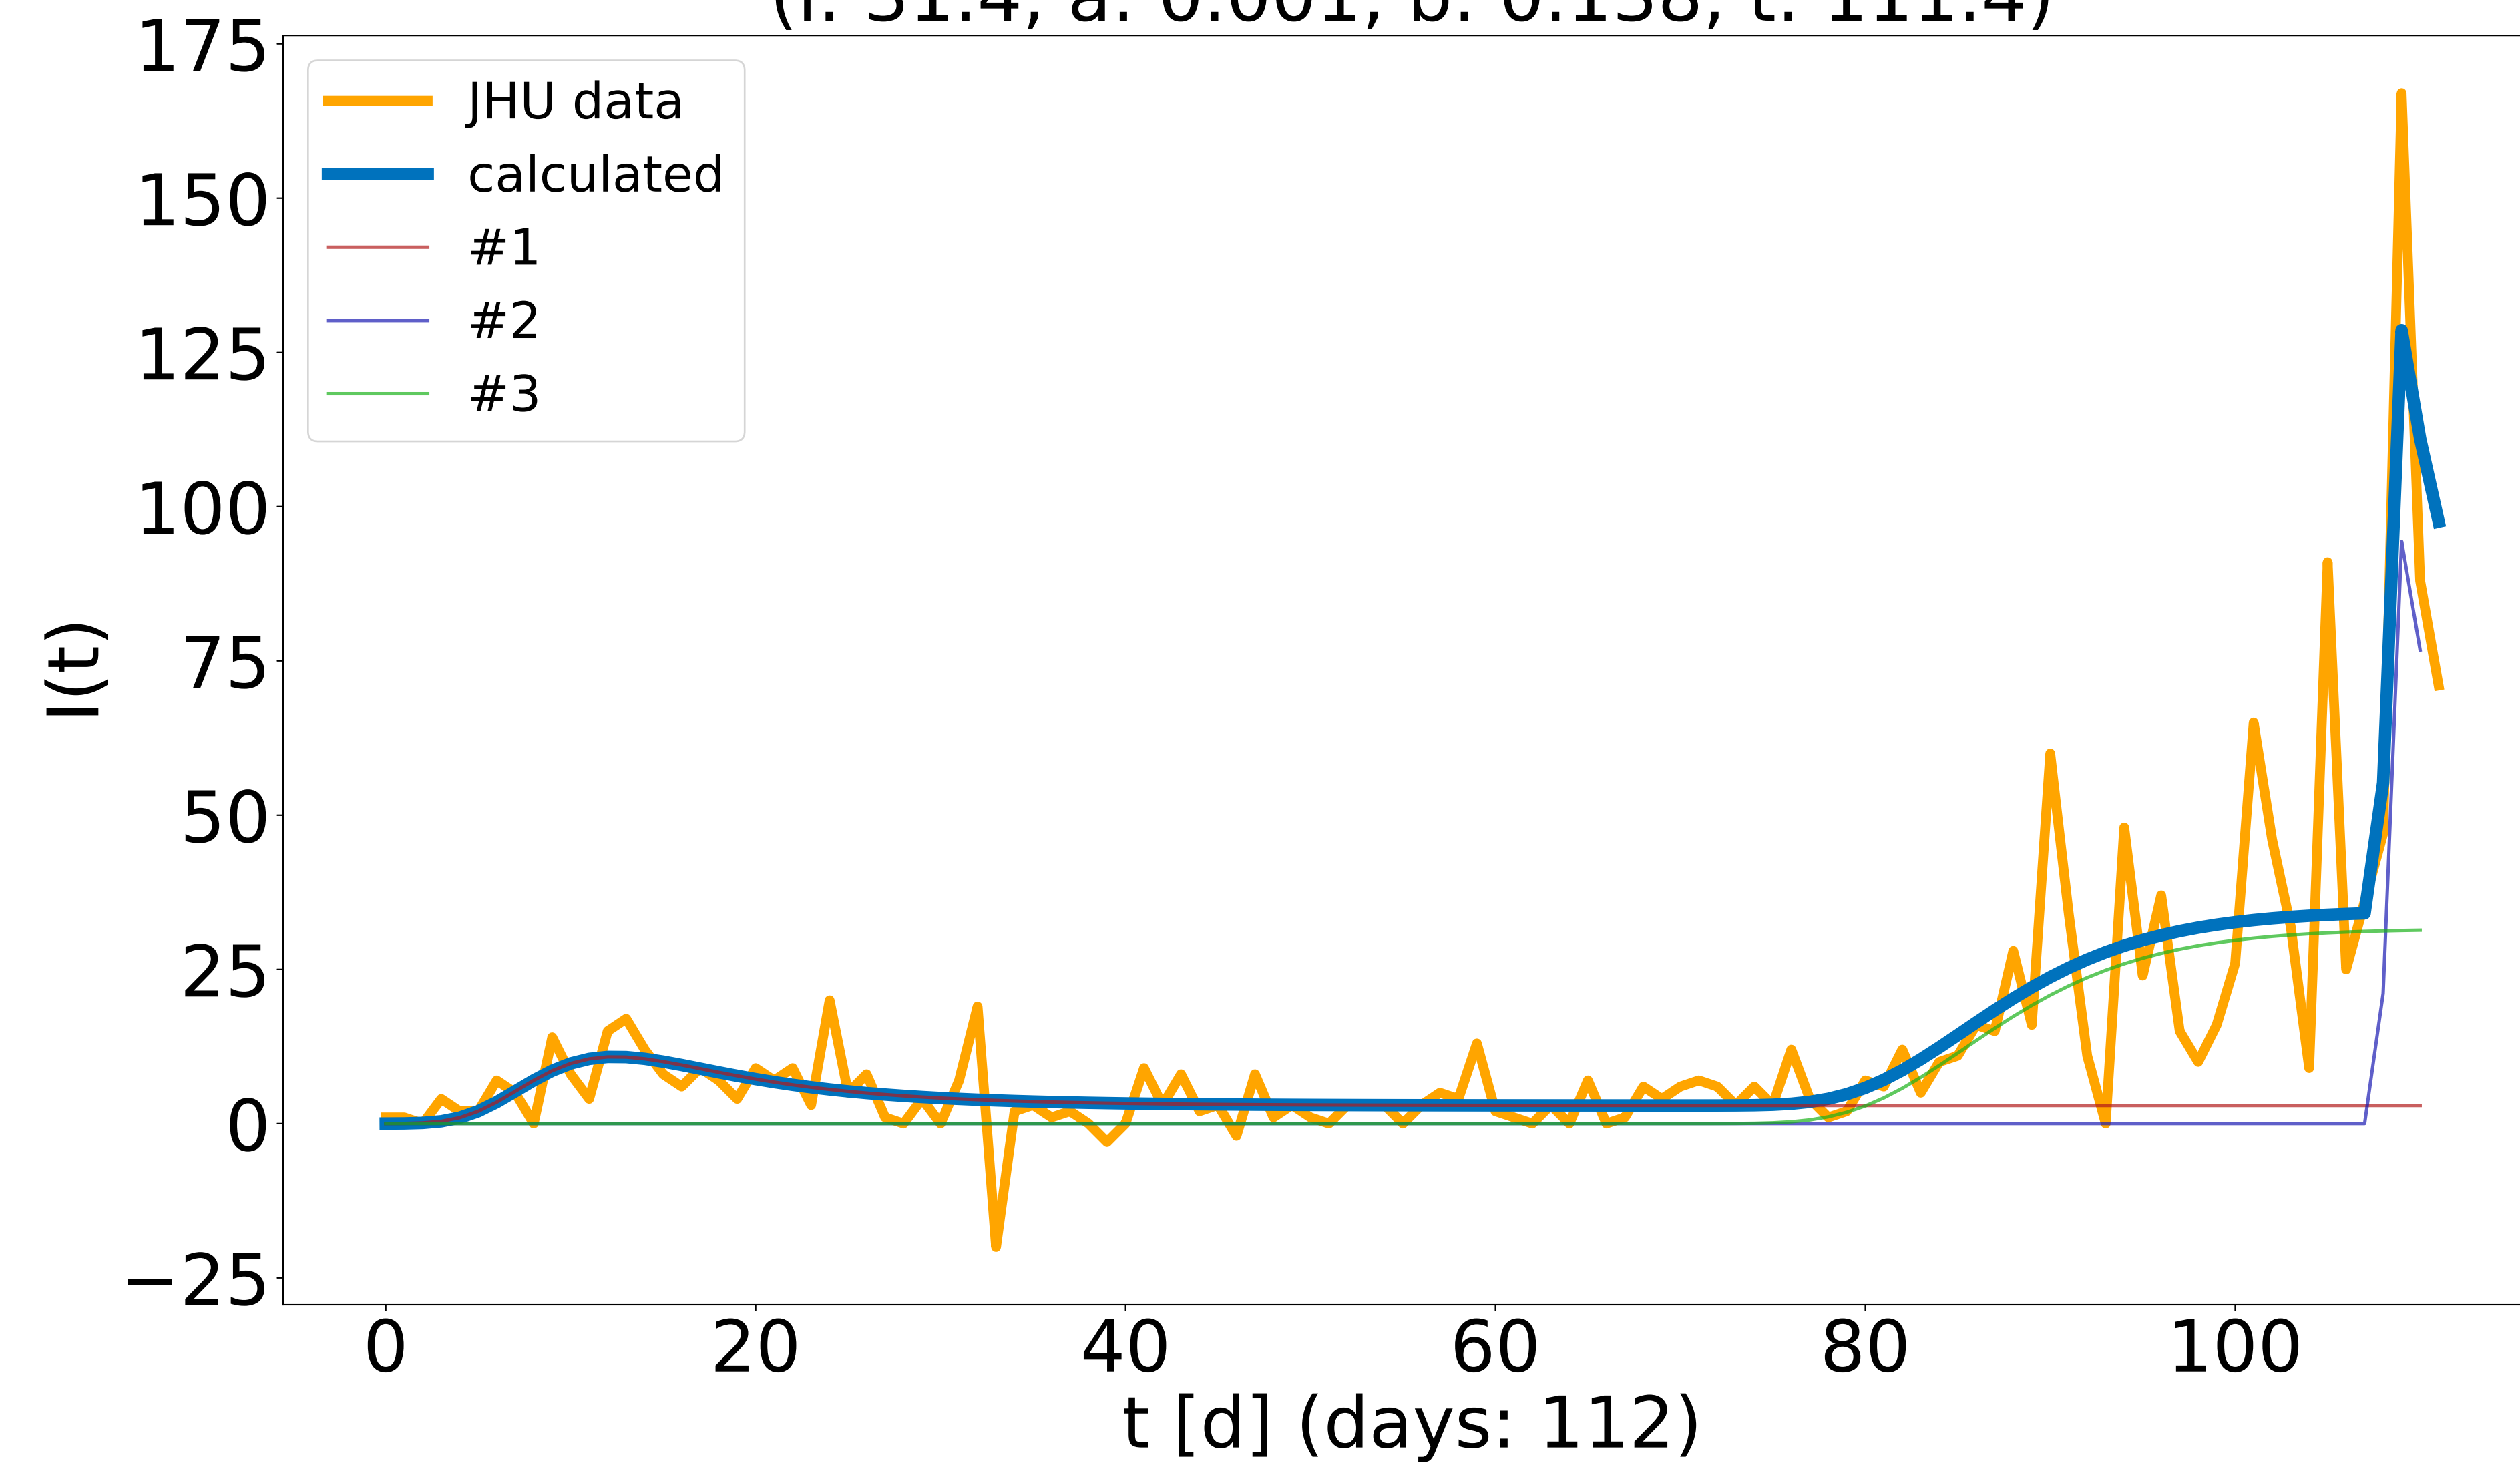

Madison, Alabama, US, Madison ( $R^2 = 0.986$ )  
(i: 3.1, a: 0.46, b: 0.144, t: 5.3)  
(i: 0.1, a: 1.148, b: 0.078, t: 77.7)  
(i: 226.6, a: 0.006, b: 0.06, t: 140.0)

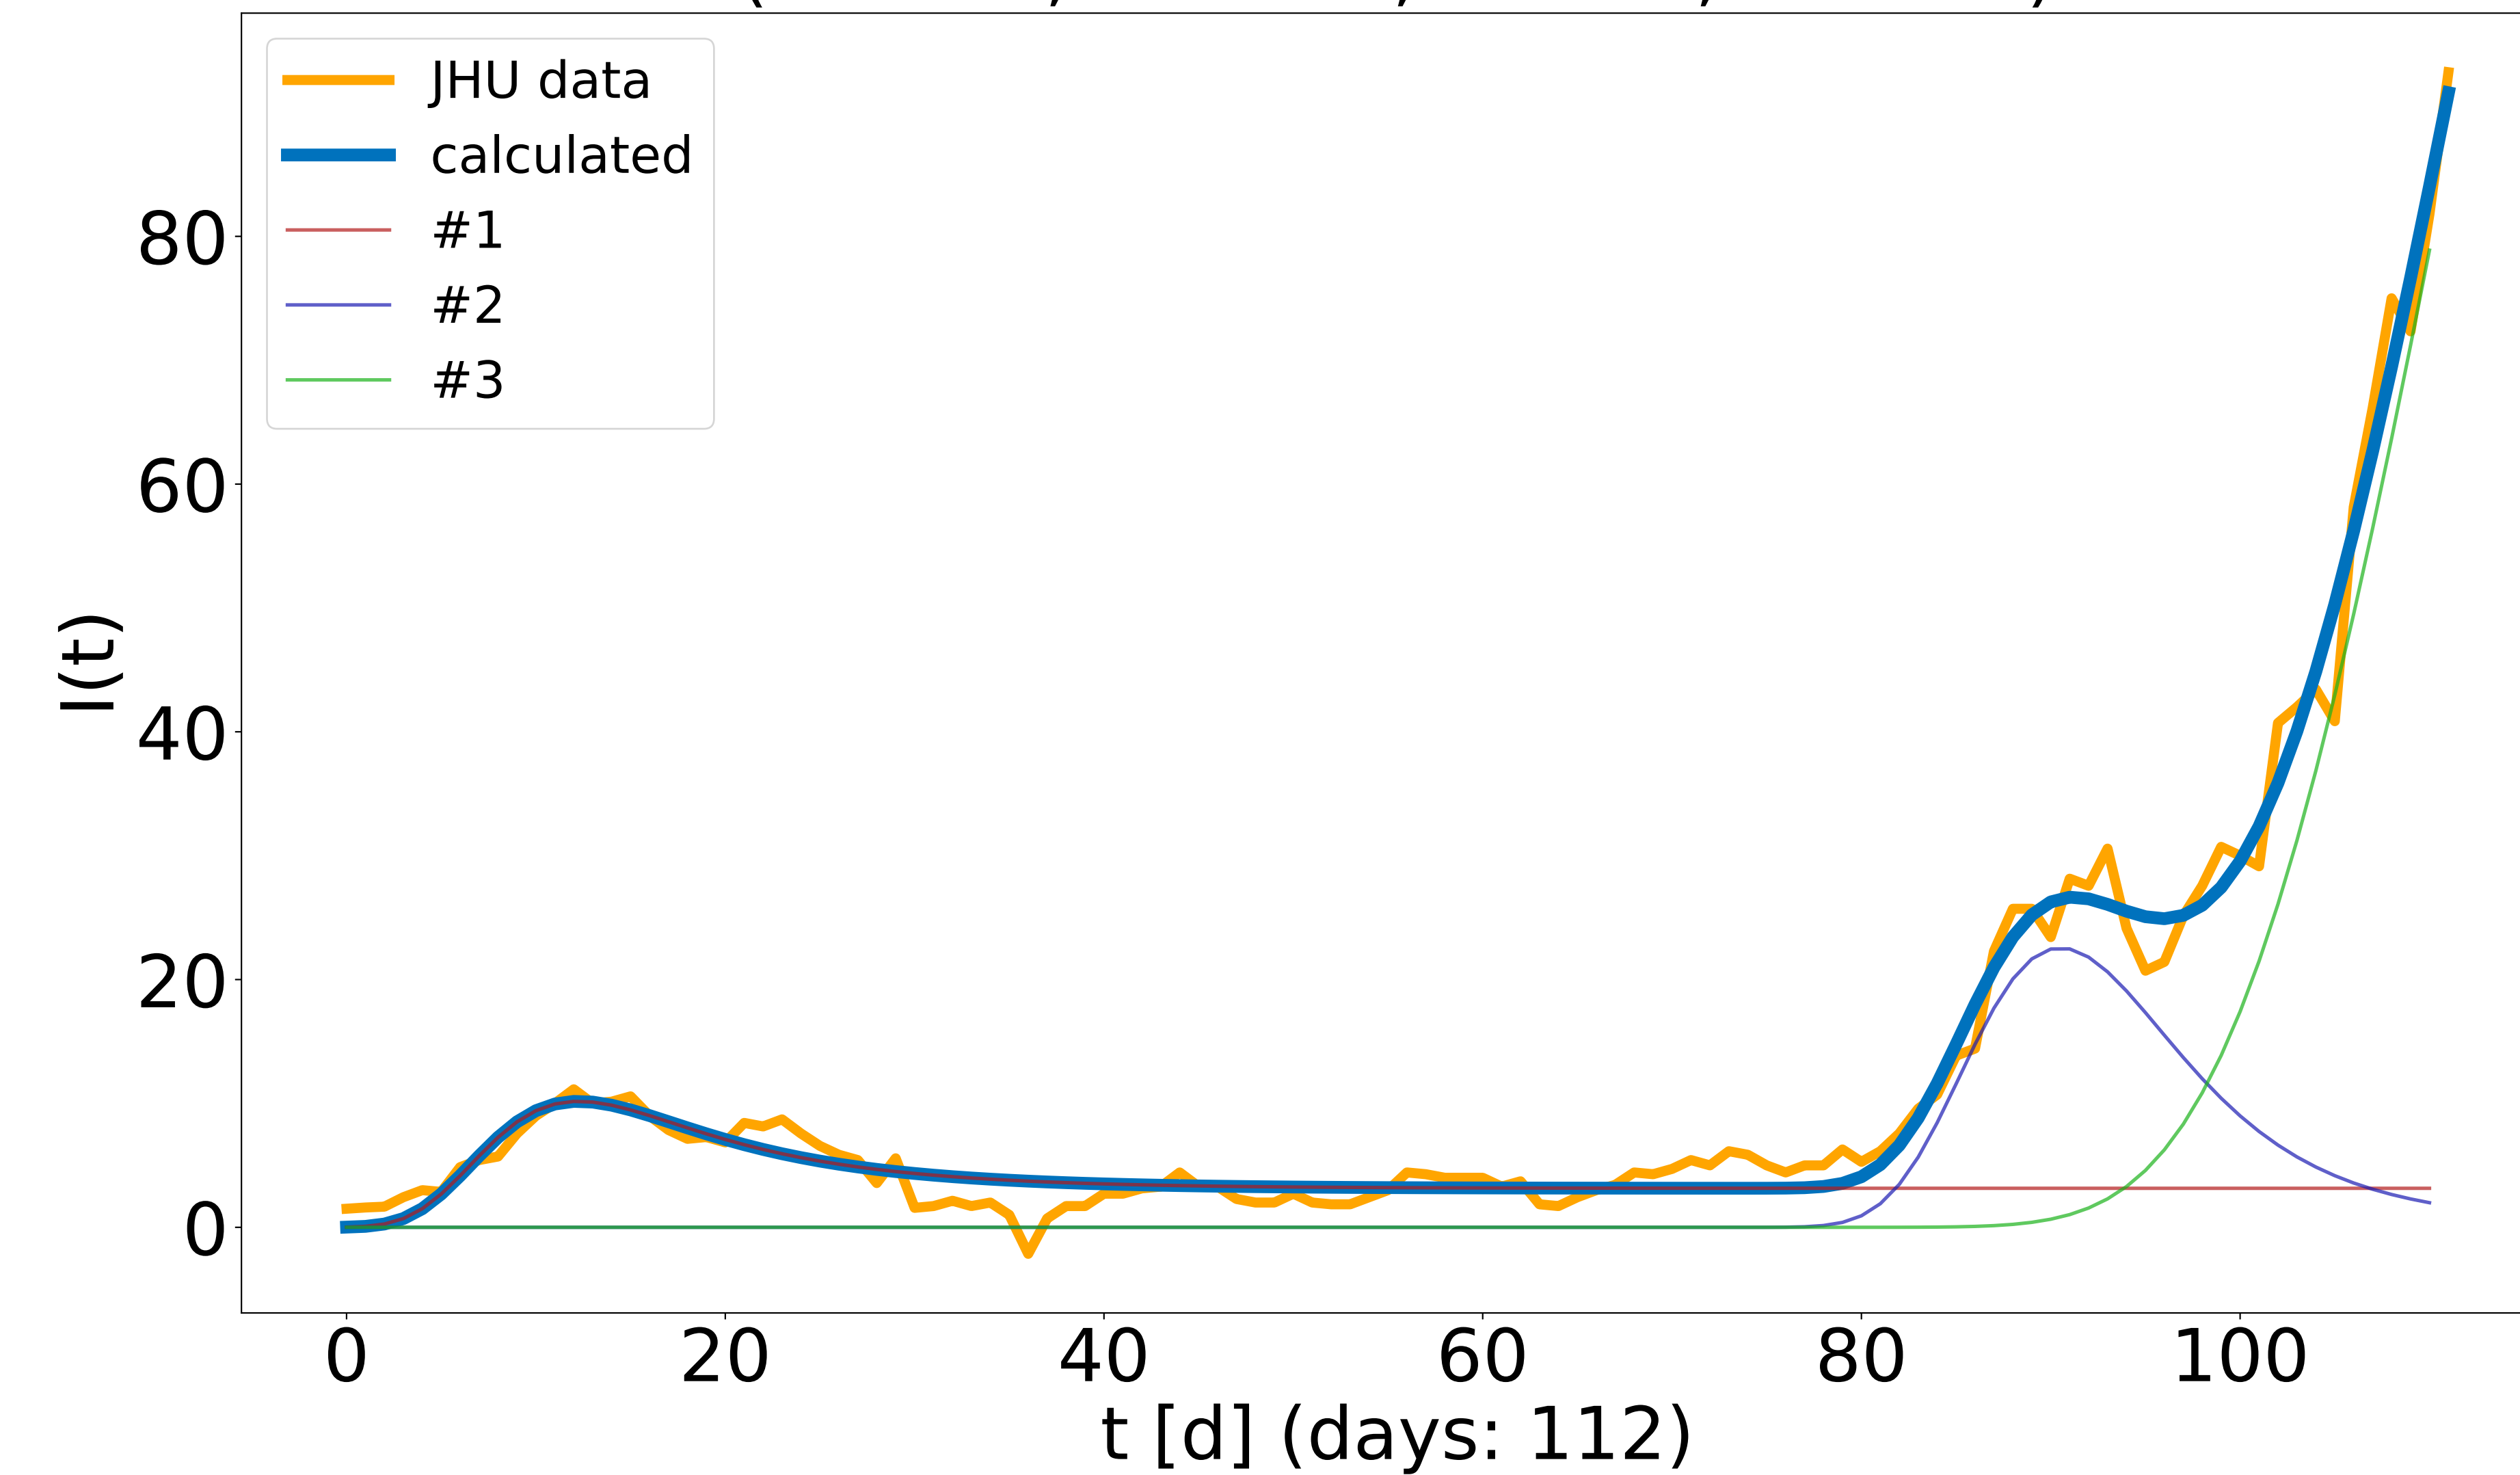

Coconino, Arizona, US, Coconino ( $R^2 = 0.488$ )  
(i: 4.0, a: 0.108, b: 0.03, t: 1.0)  
(i: 8.6, a: 1.315, b: 0.639, t: 47.3)  
(i: 41.8, a: 0.001, b: 0.155, t: 118.8)

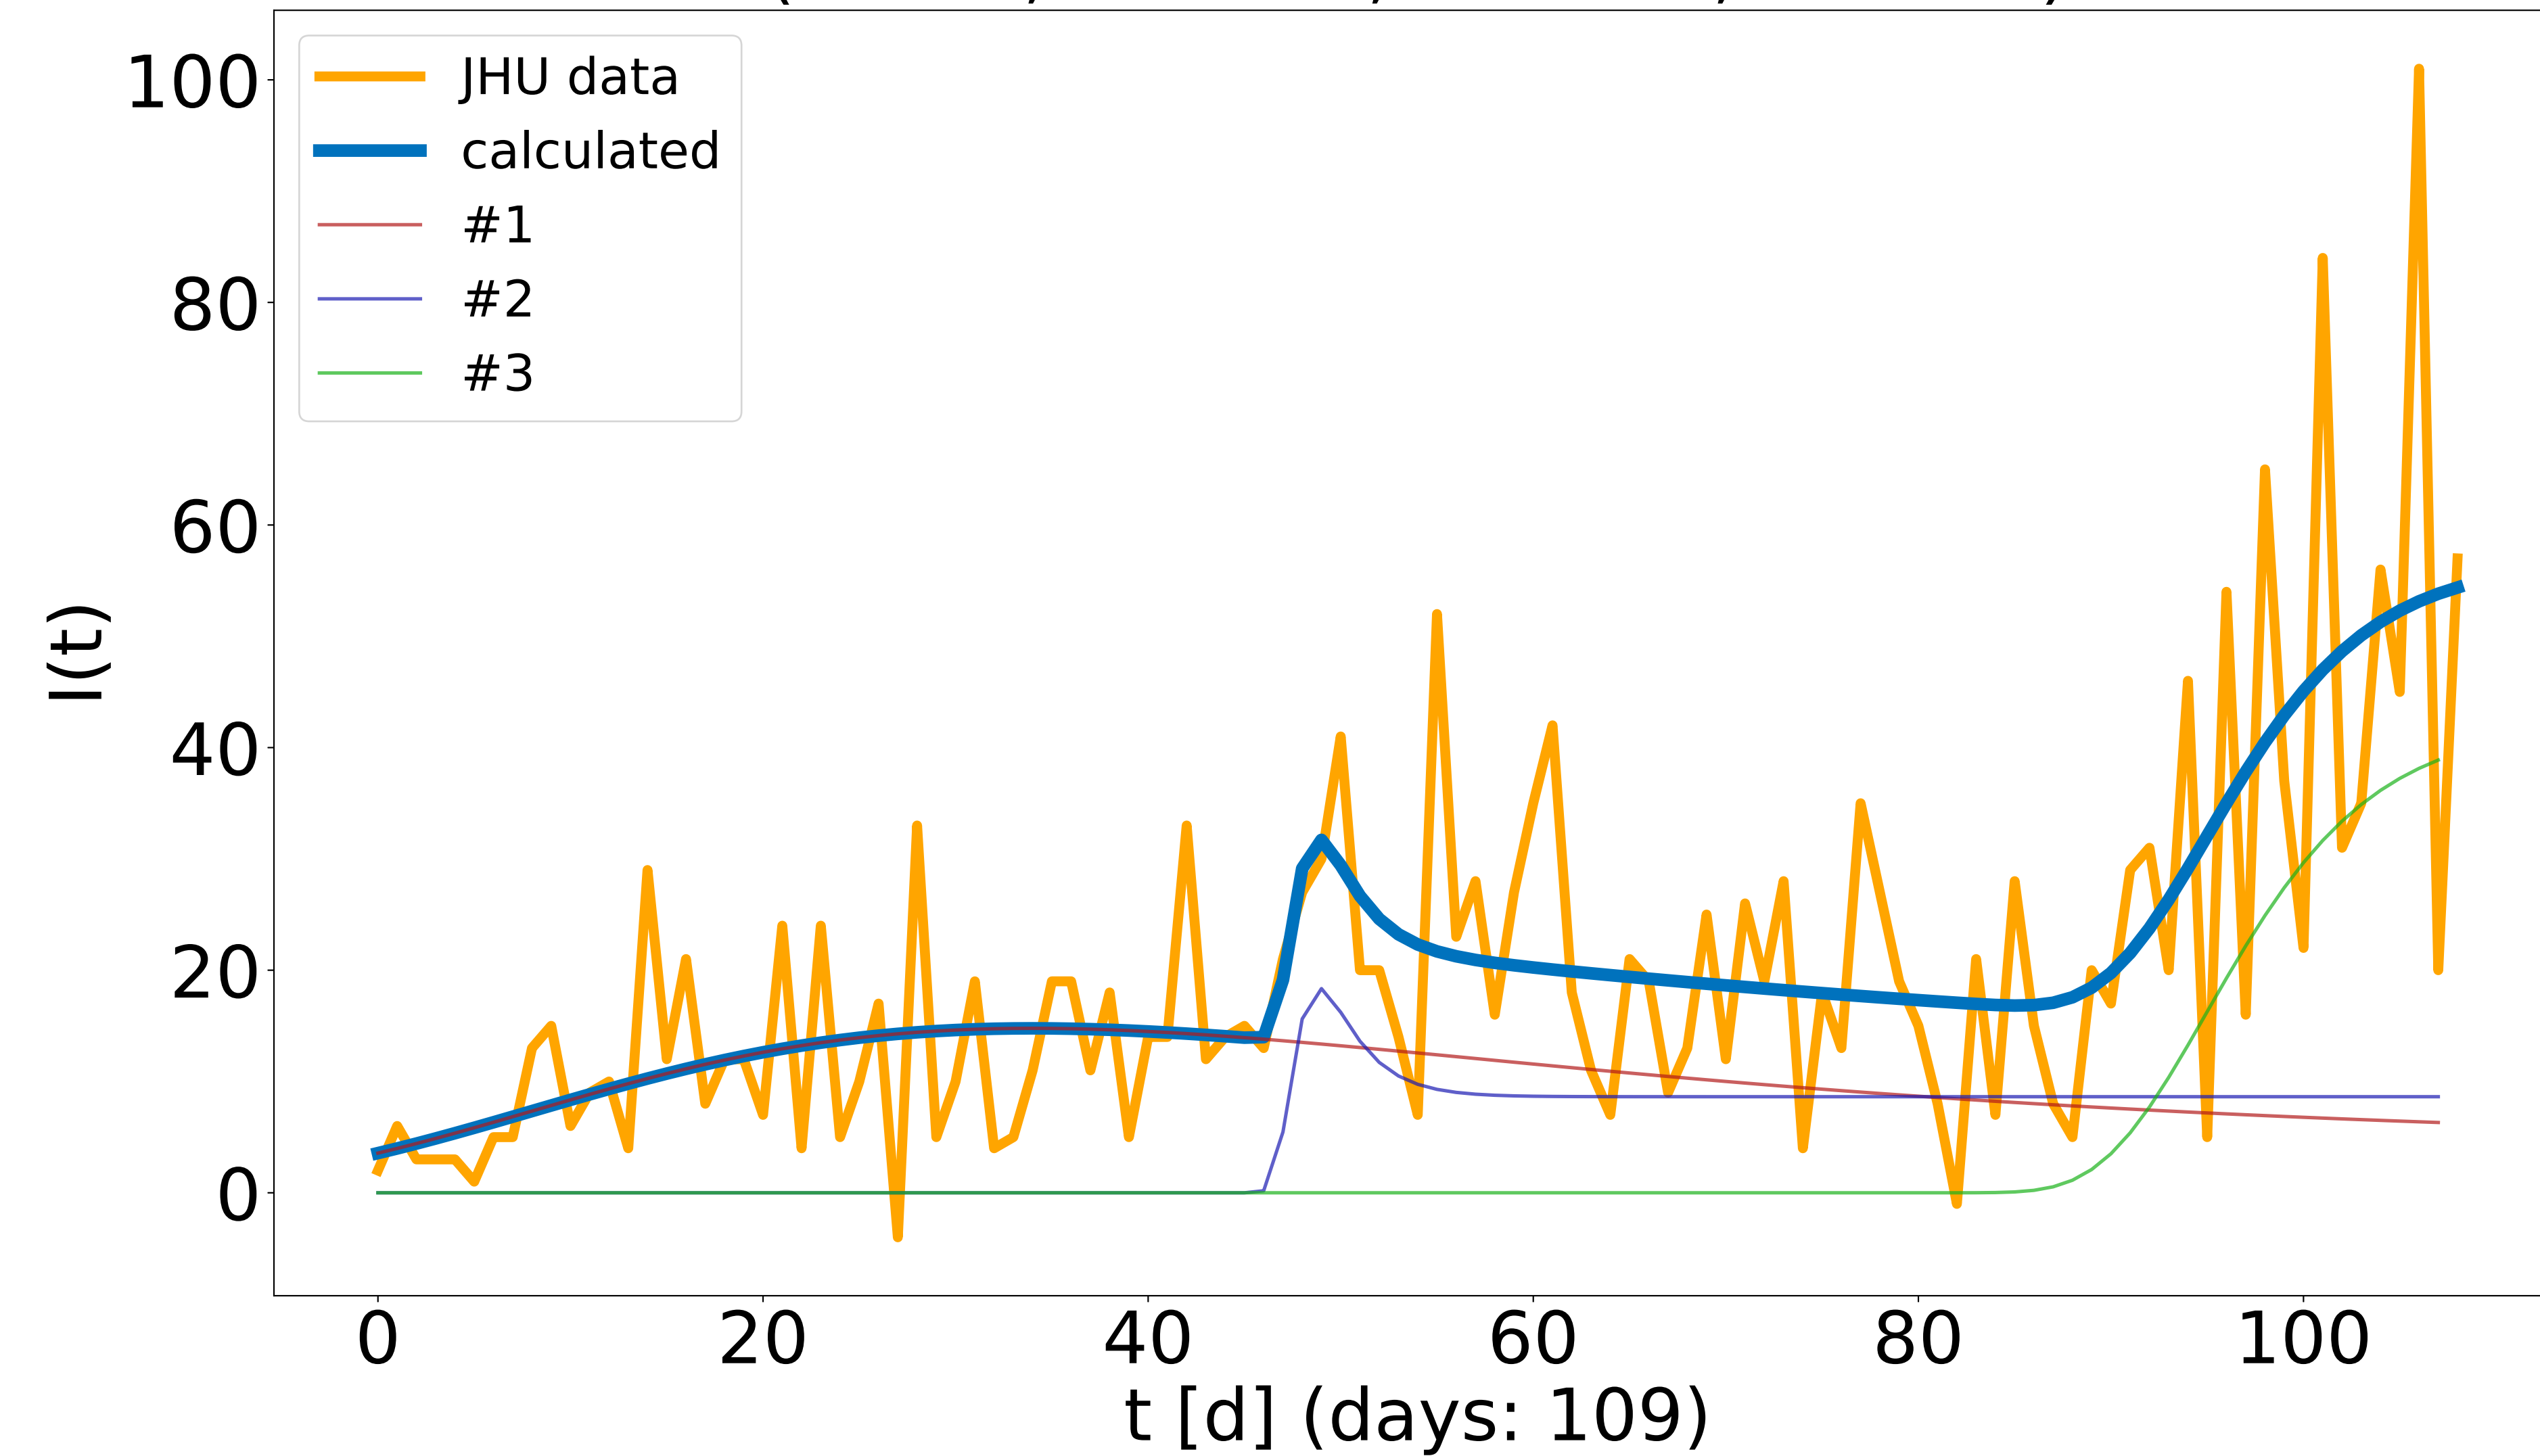

Coconino, Arizona, US, Coconino ( $R^2 = 0.971$ )  
(i: 10.7, a: 0.065, b: 0.115, t: 10.4)  
(i: 1.4, a: 0.393, b: 0.063, t: 37.8)  
(i: 46.1, a: 0.001, b: 0.129, t: 122.1)

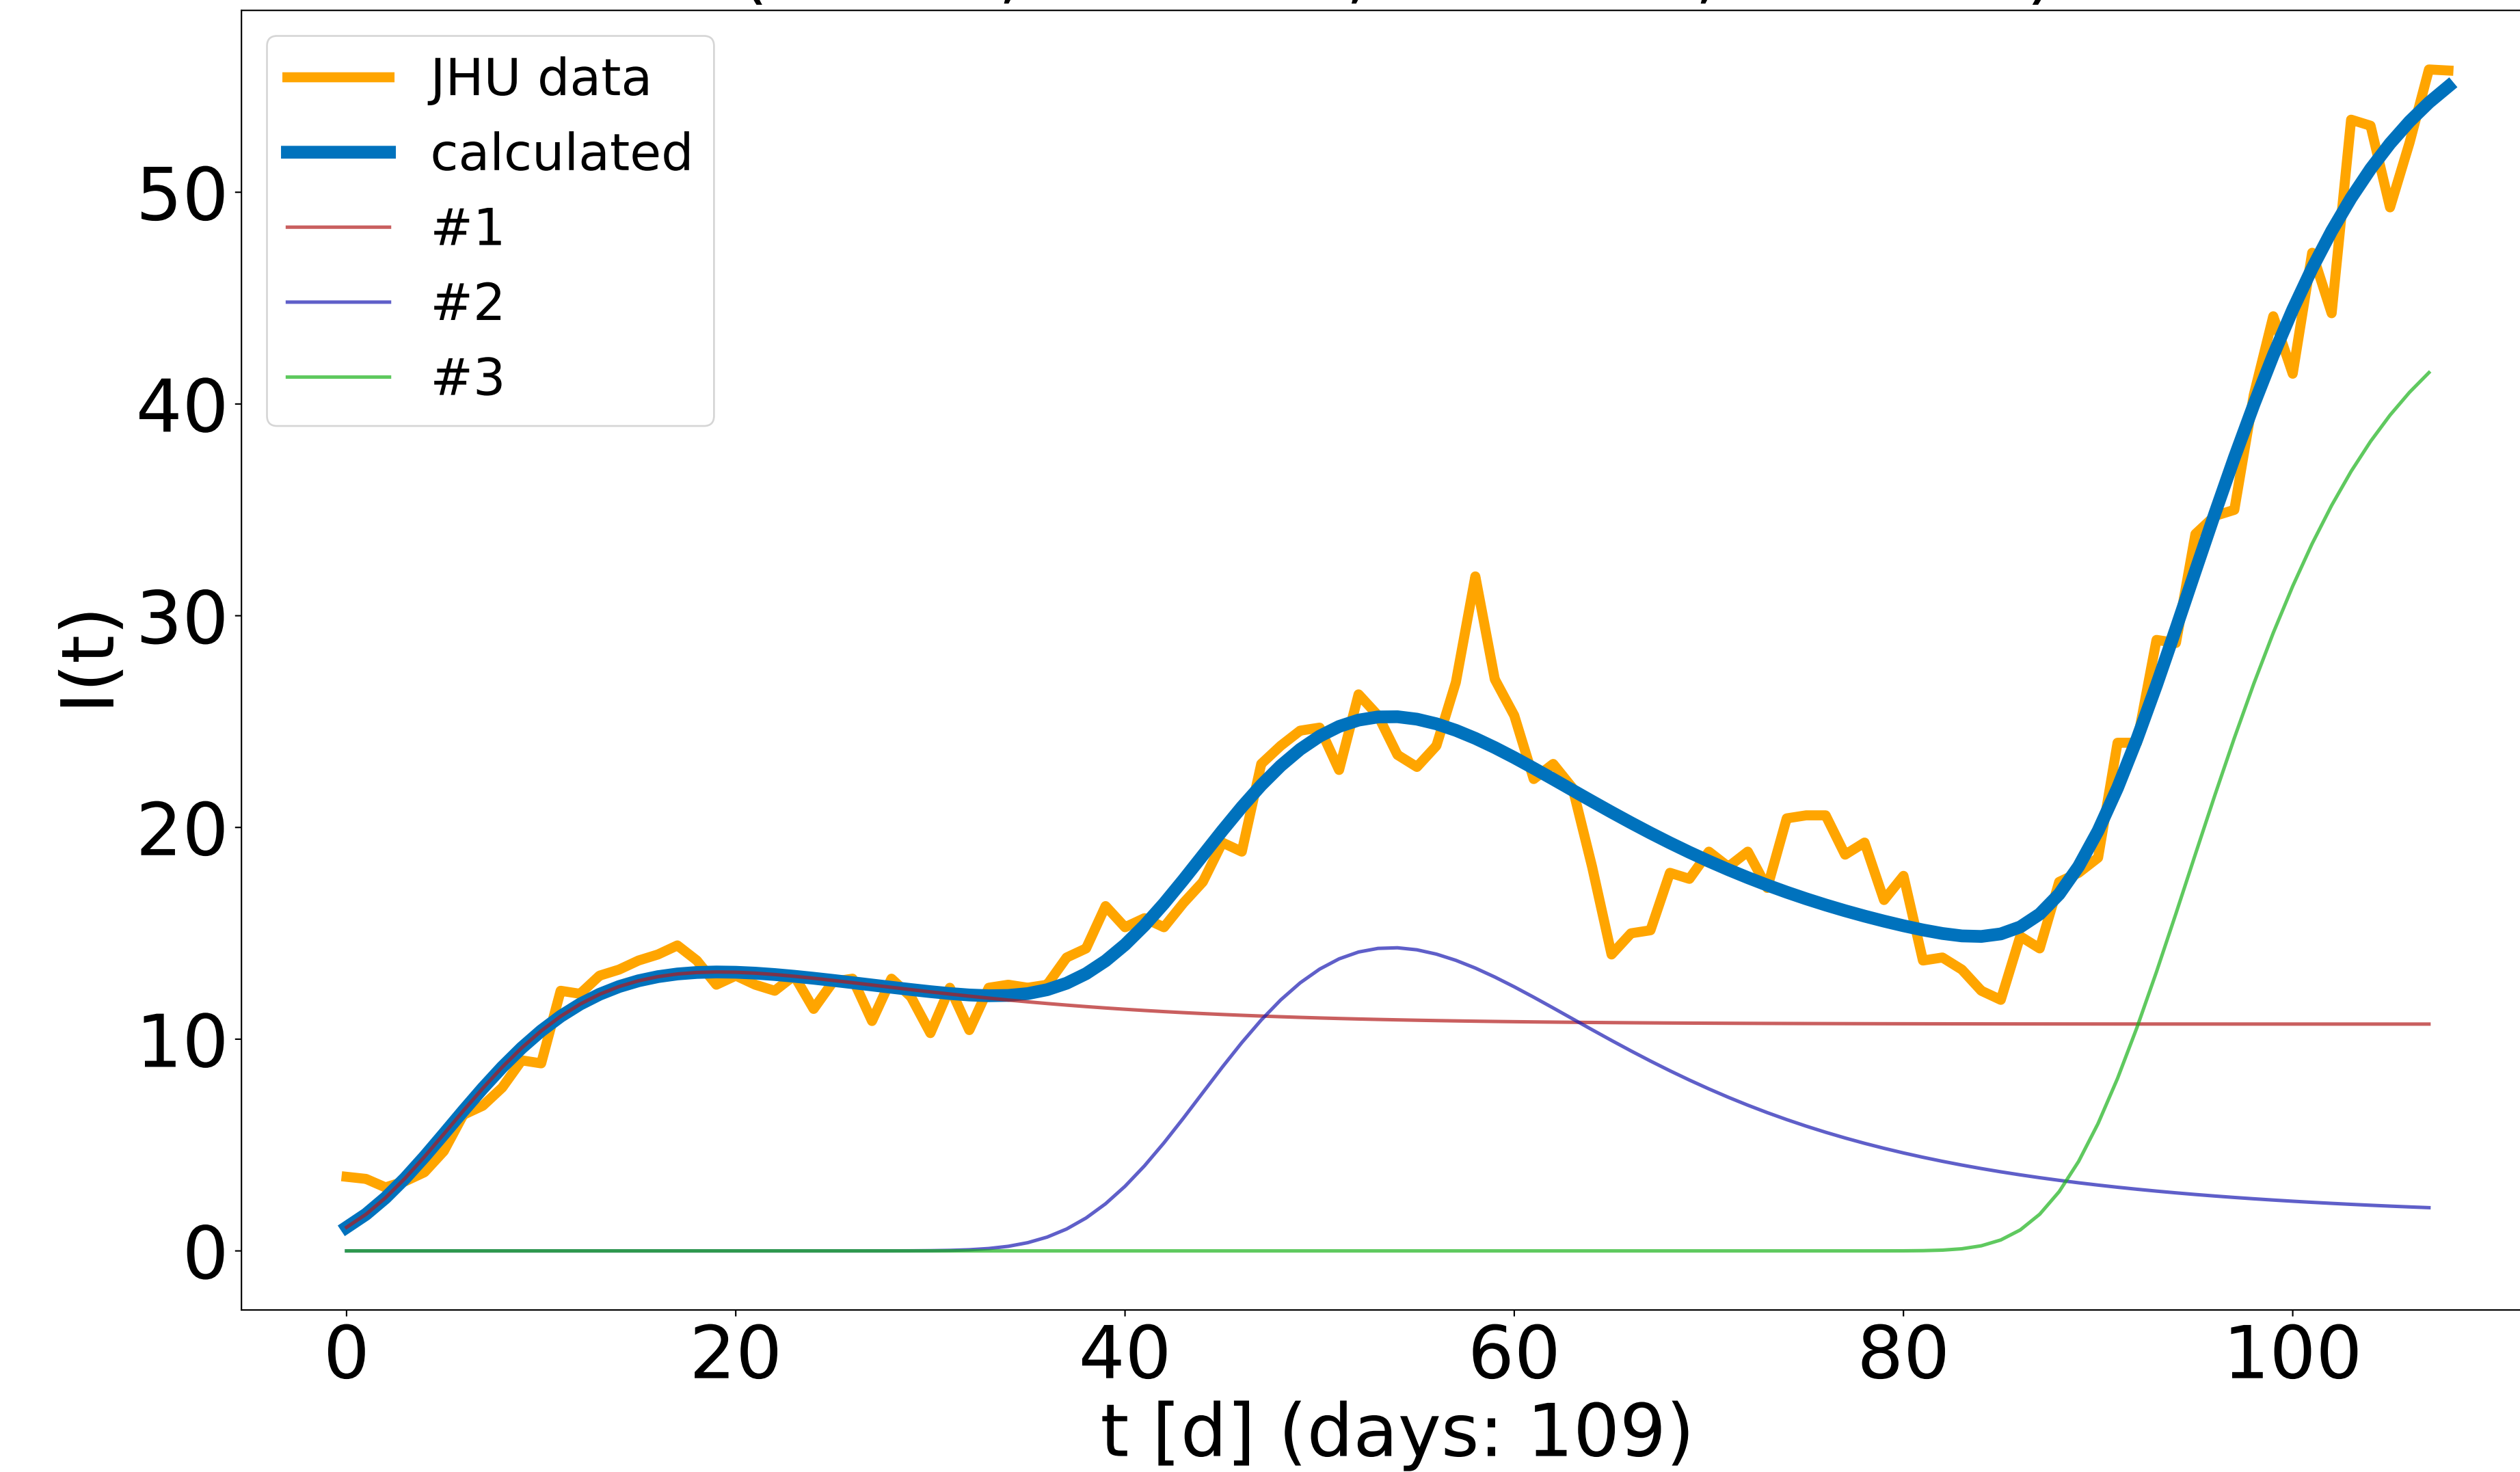

Hot Spring, Arkansas, US, Hot Spring ( $R^2 = 0.454$ )

(i: 0.1, a: 2.0, b: 0.244, t: 30.3)

(i: 0.1, a: 2.0, b: 0.309, t: 43.3)

(i: 22.1, a: 2.0, b: 0.522, t: 88.1)

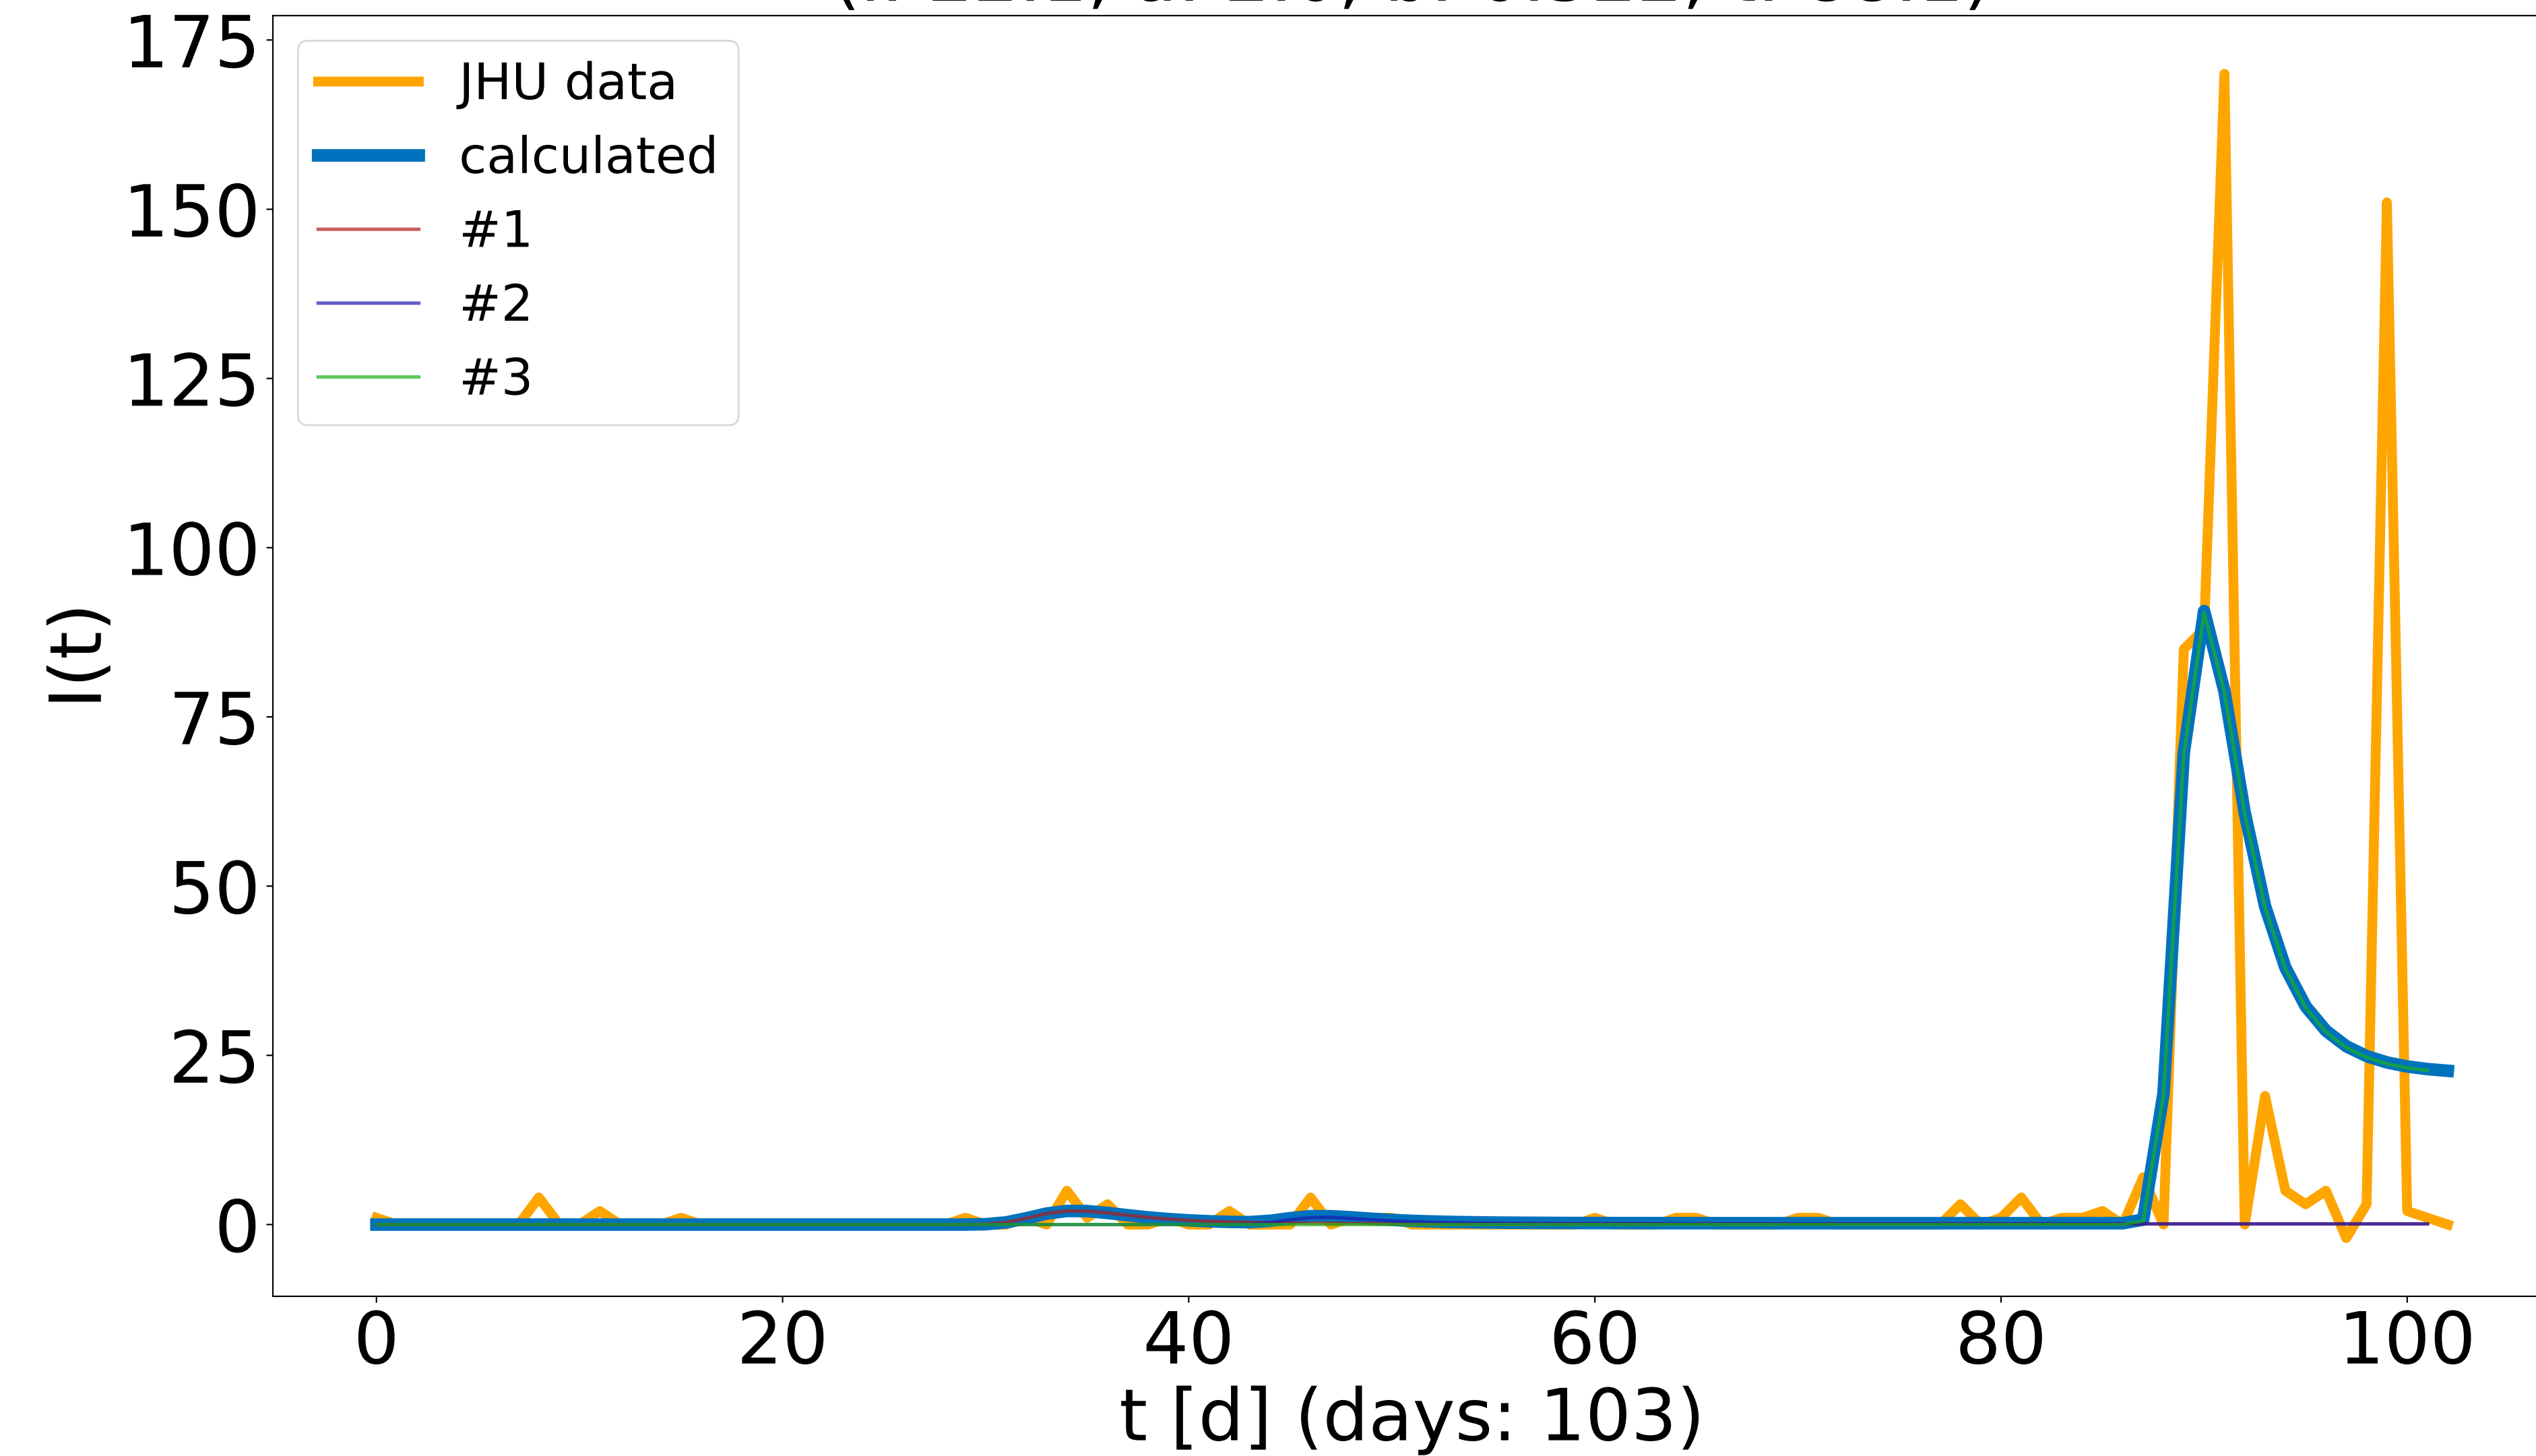

Hot Spring, Arkansas, US, Hot Spring ( $R^2 = 0.971$ )

(i: 3.0, a: 2.0, b: 0.256, t: 85.1)

(i: 5.5, a: 2.0, b: 0.654, t: 90.3)

(i: 50.2, a: 0.001, b: 0.223, t: 118.4)

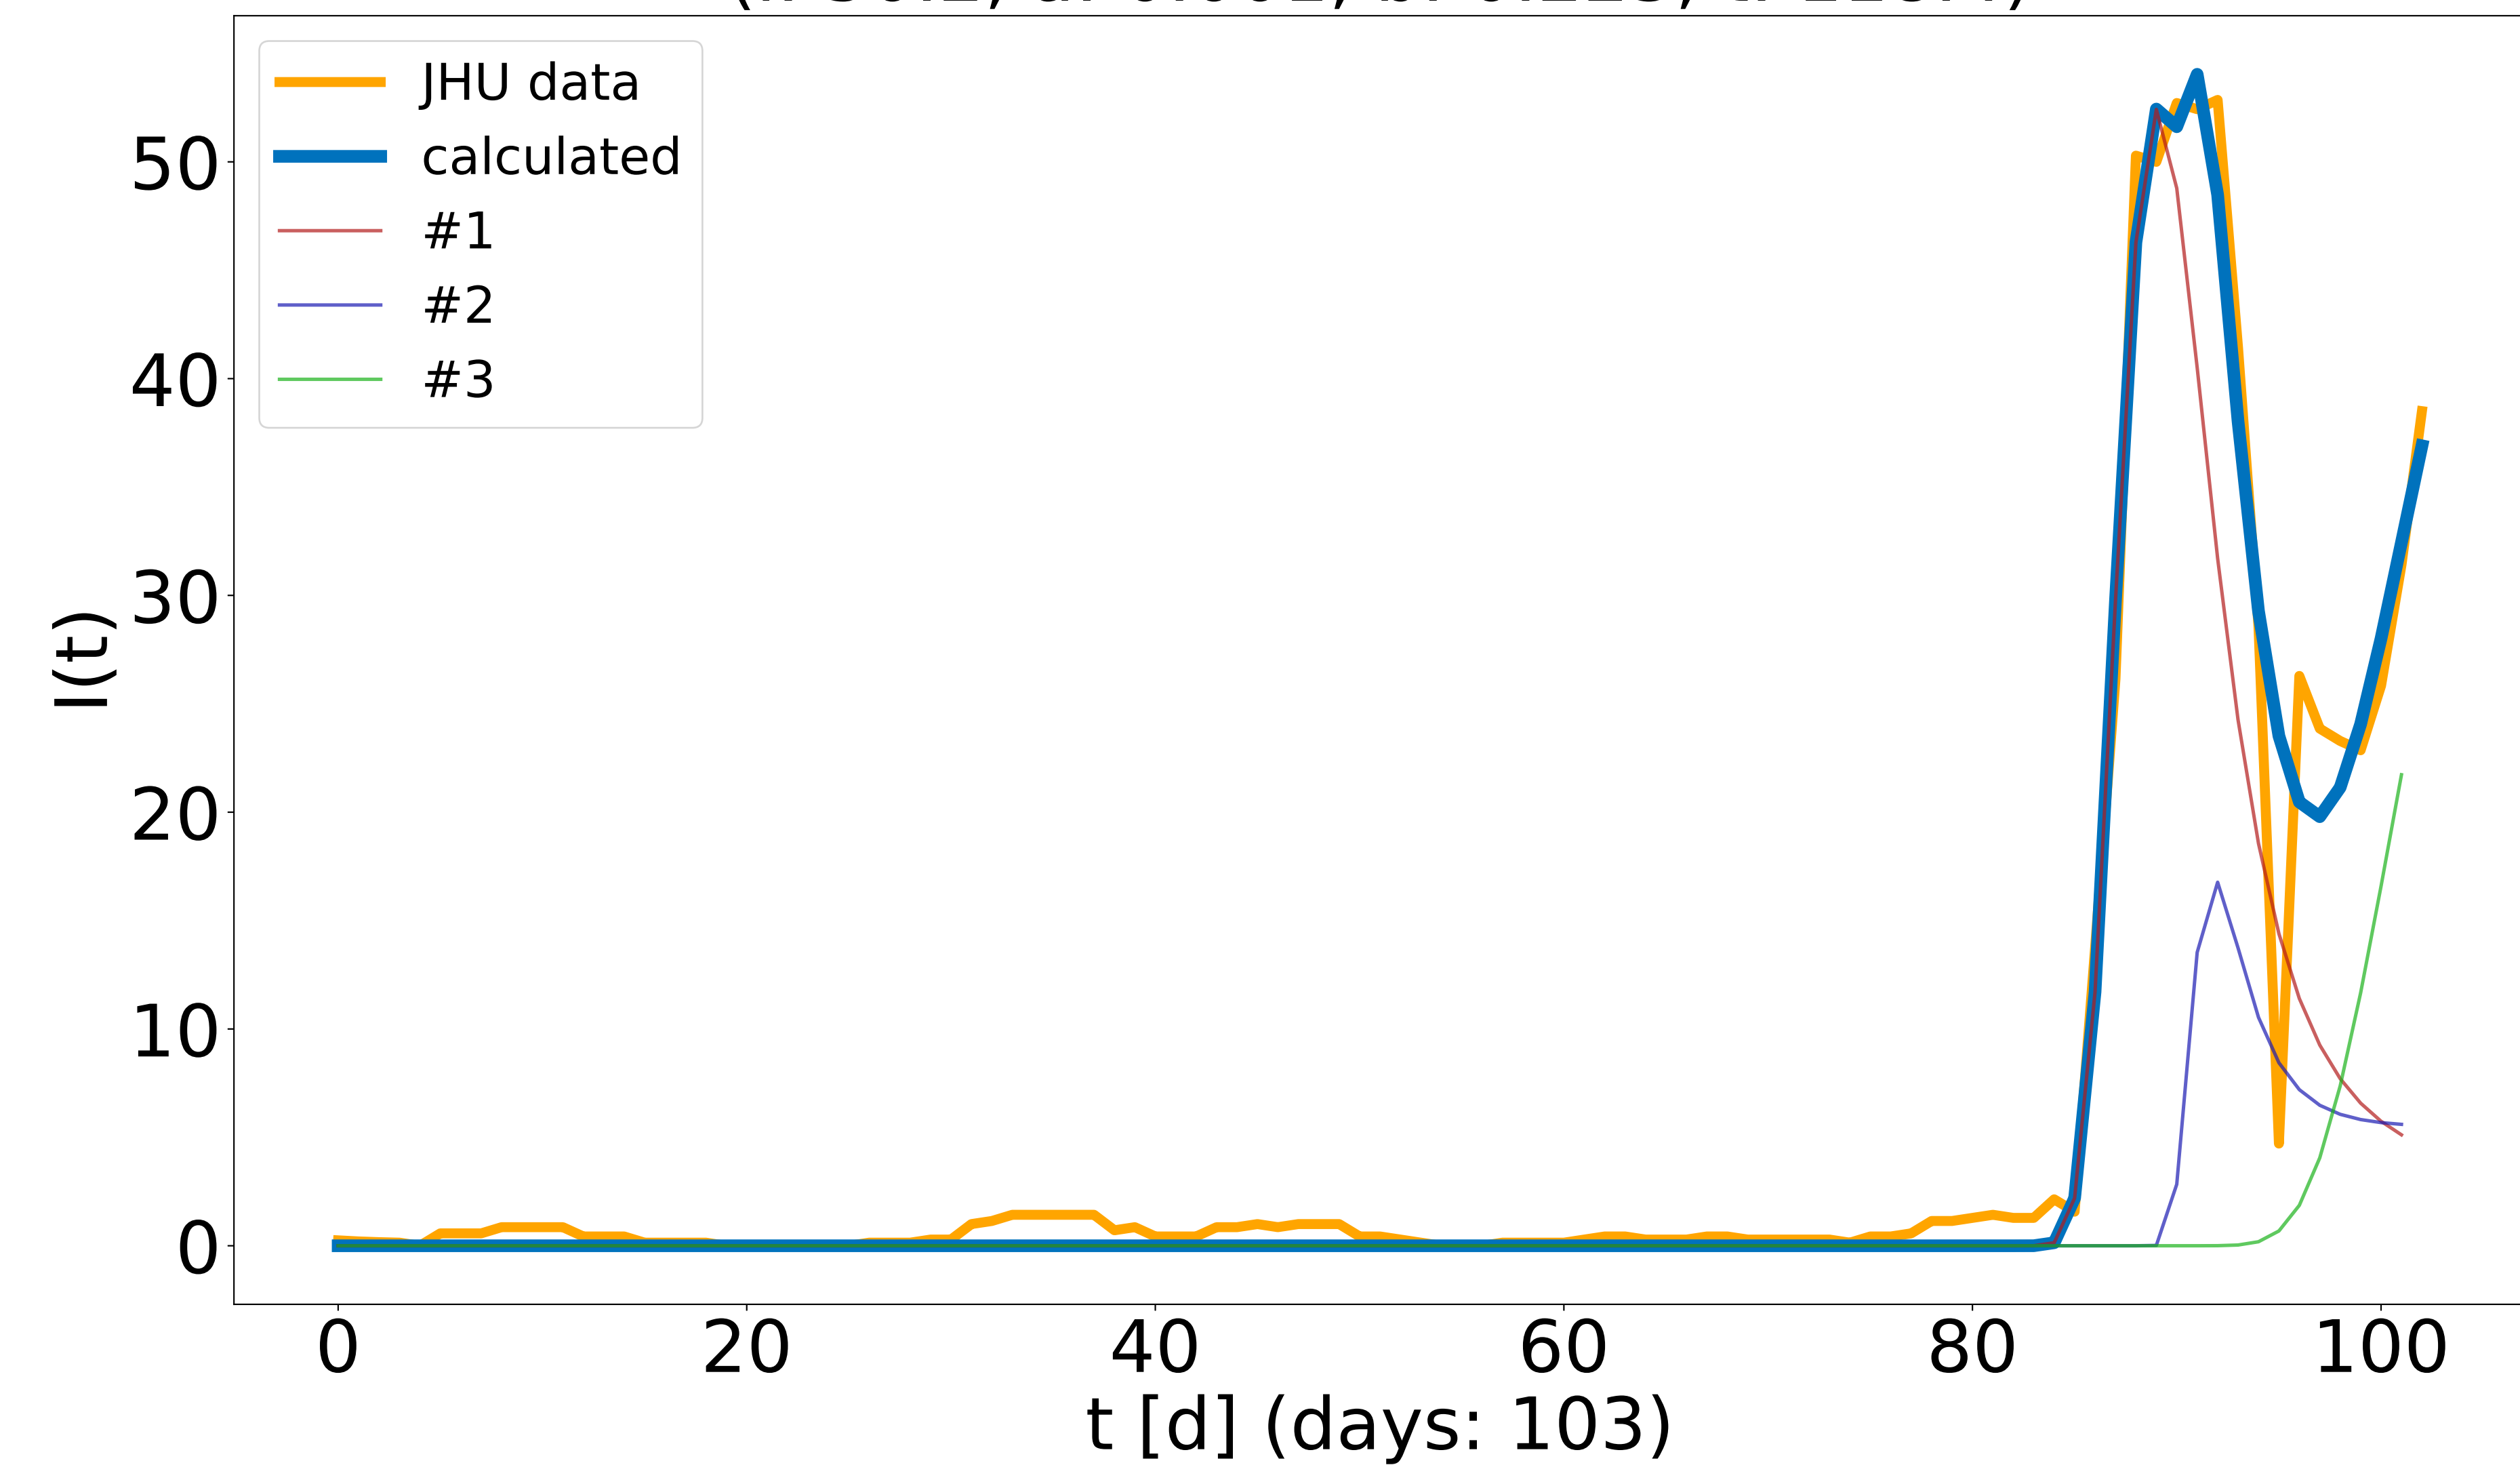

Pulaski, Arkansas, US, Pulaski ( $R^2 = 0.709$ )  
(i: 11.5, a: 0.011, b: 0.042, t: 1.0)  
(i: 16.4, a: 2.0, b: 1.001, t: 71.2)  
(i: 50.9, a: 0.001, b: 0.577, t: 102.6)

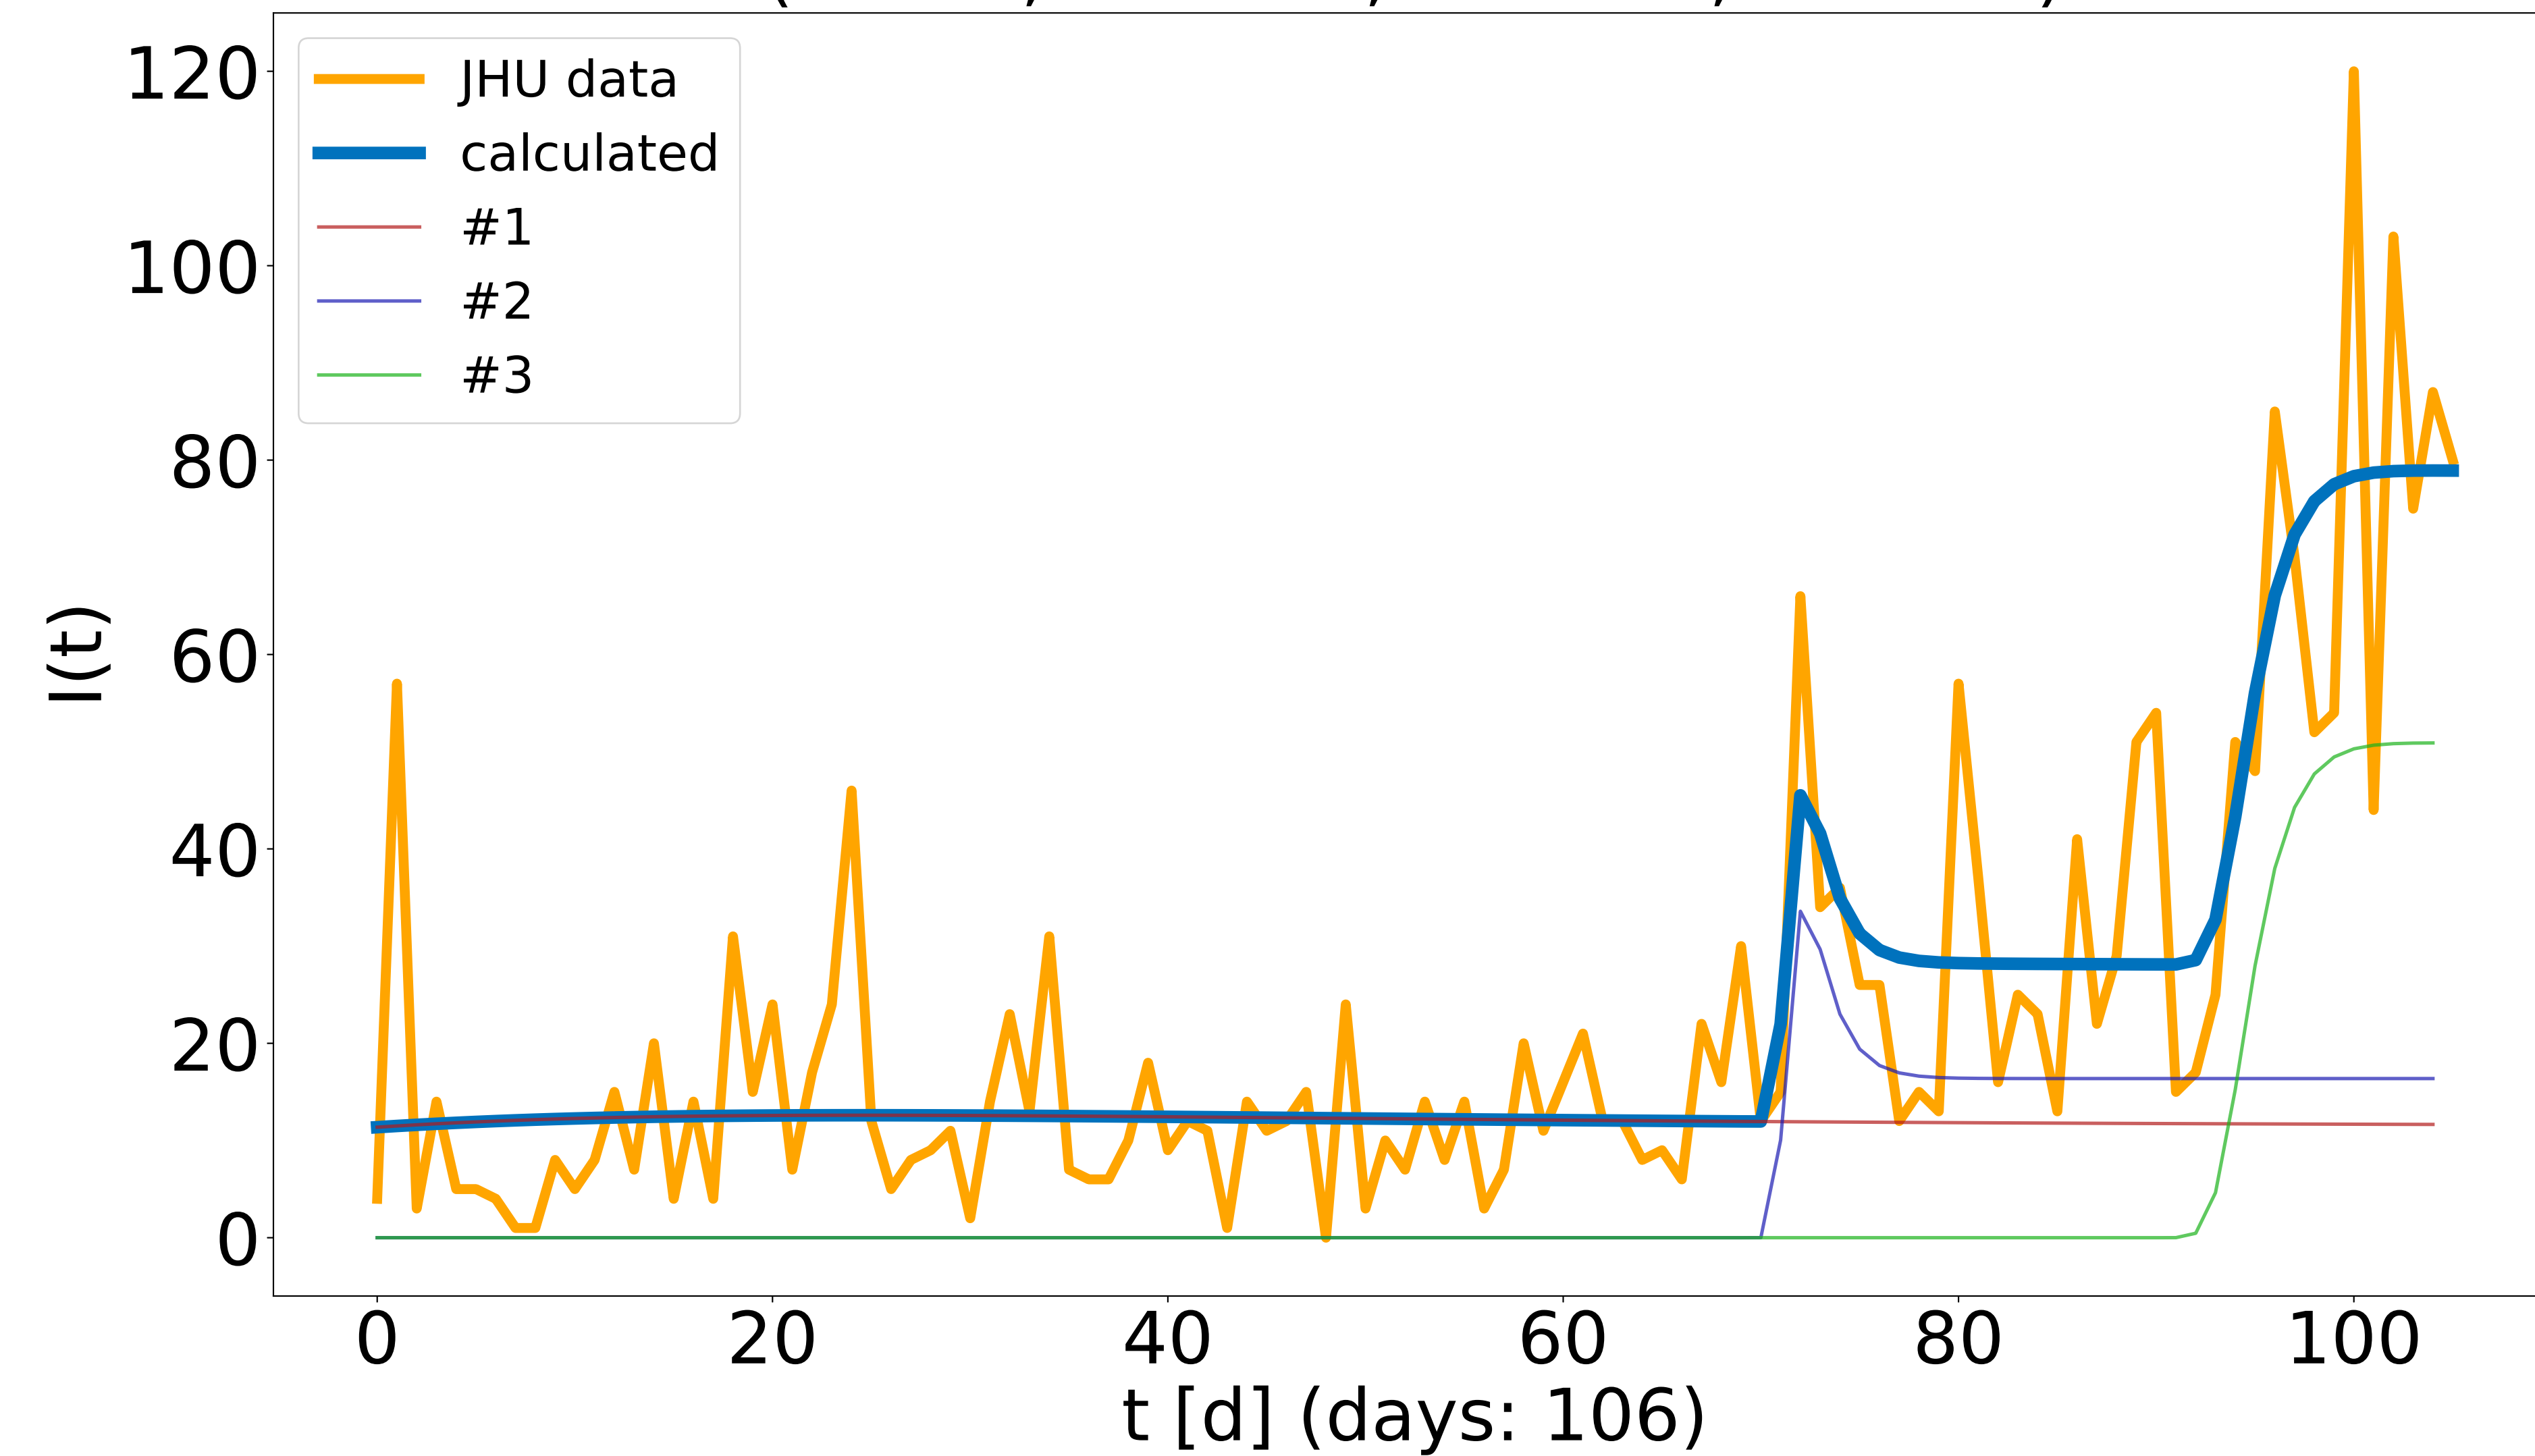

Pulaski, Arkansas, US, Pulaski ( $R^2 = 0.971$ )  
(i: 10.4, a: 0.026, b: 0.043, t: 1.0)  
(i: 15.5, a: 0.293, b: 0.502, t: 69.6)  
(i: 0.1, a: 0.818, b: 0.047, t: 83.1)

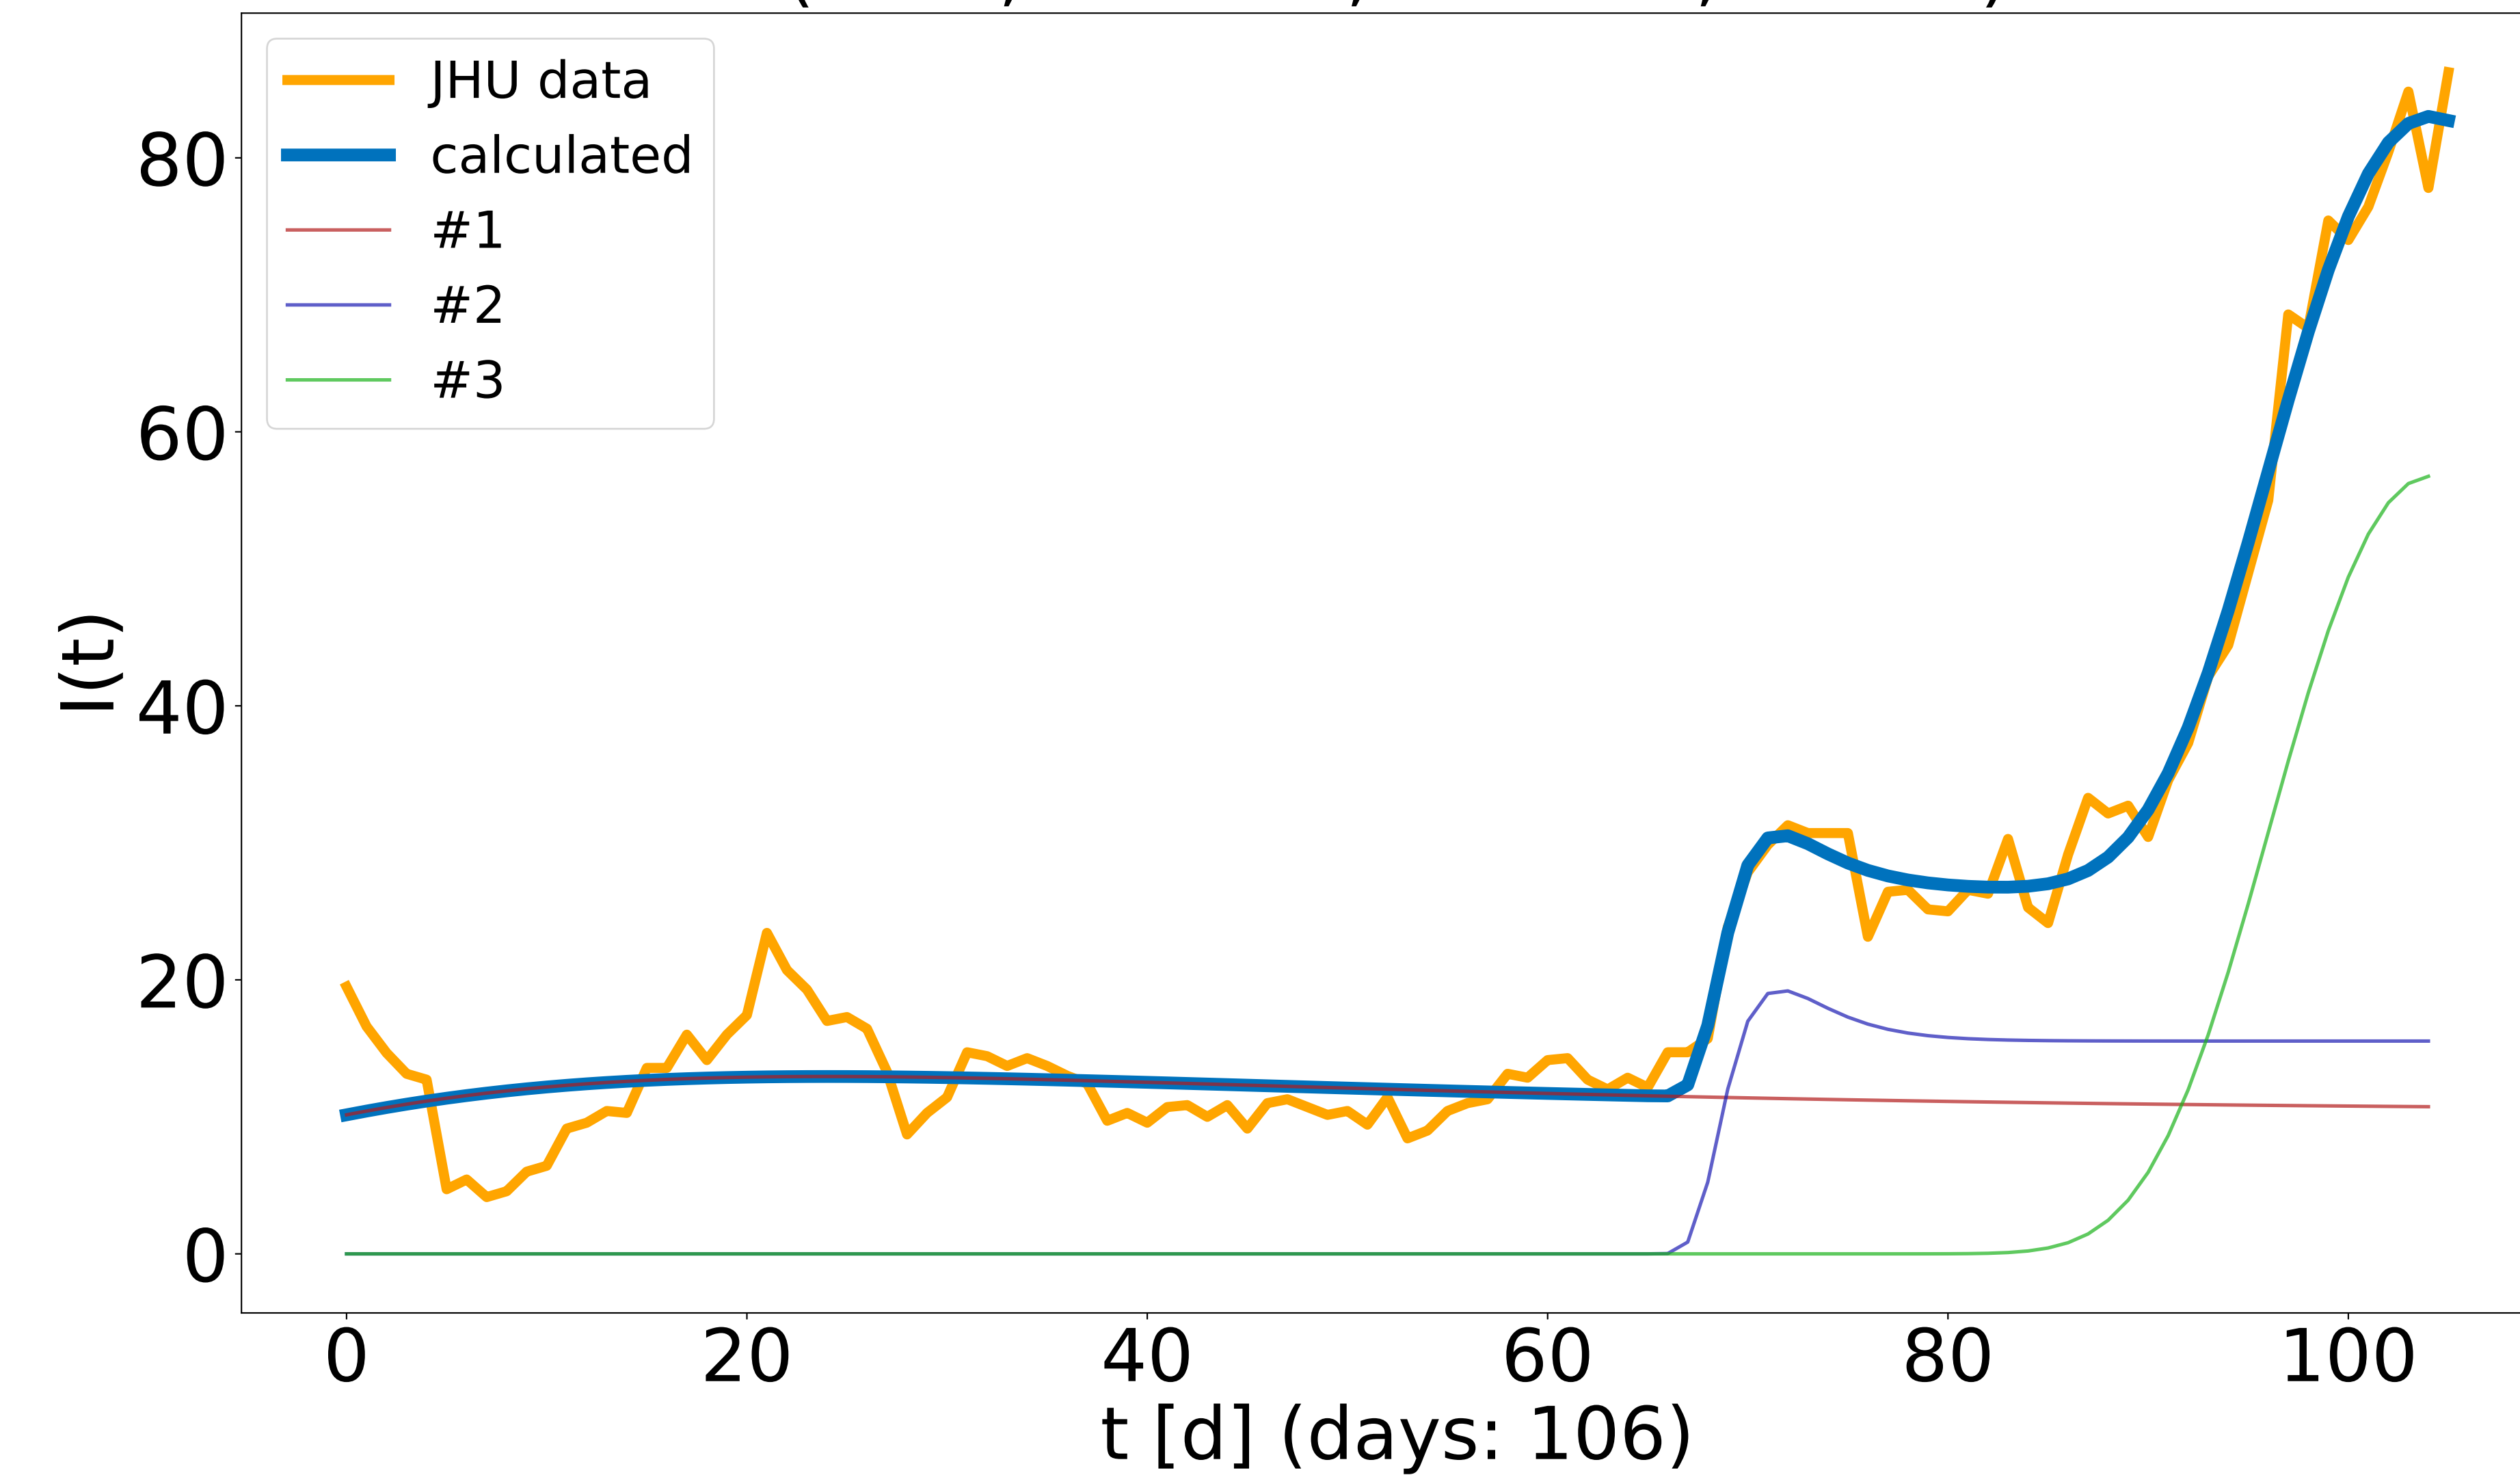



Contra Costa, California, US, Contra Costa ( $R^2 = 0.169$ )

(i: 9.6, a: 0.499, b: 0.253, t: 18.2)

(i: 4.3, a: 1.998, b: 0.379, t: 29.0)

(i: 23.7, a: 1.054, b: 1.4, t: 41.7)

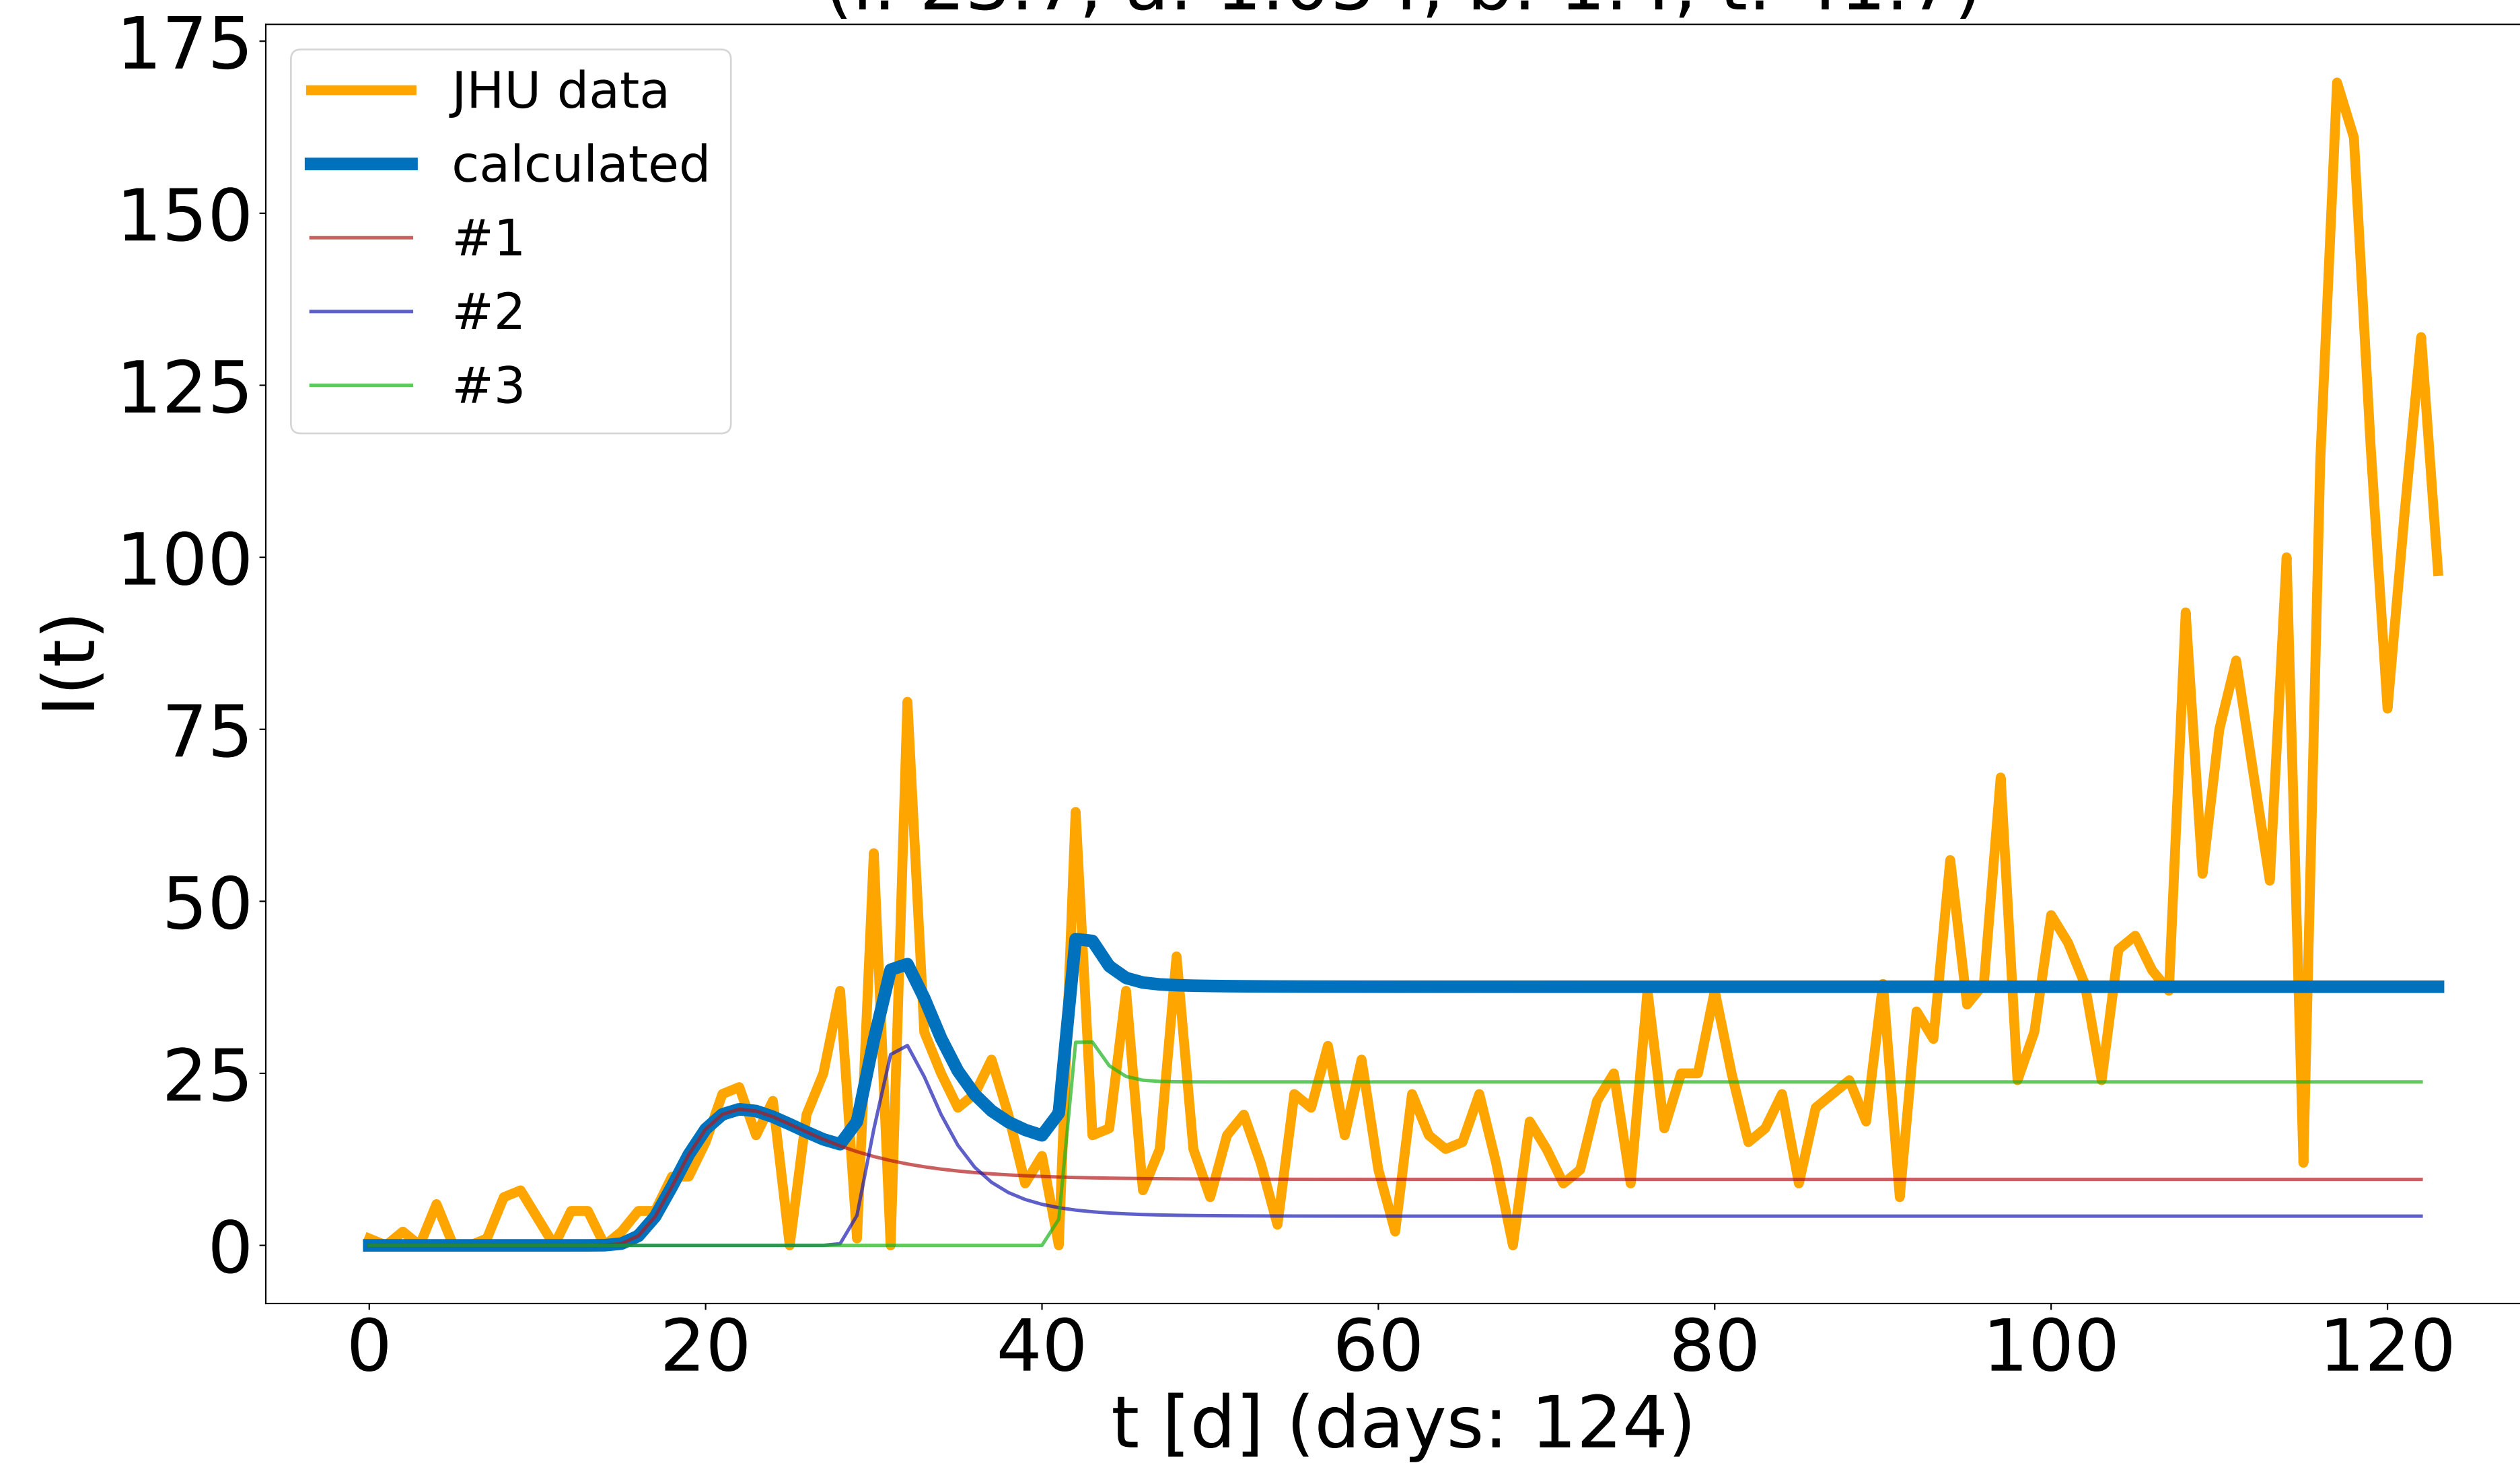

Contra Costa, California, US, Contra Costa ( $R^2 = 0.979$ )

(i: 8.9, a: 0.208, b: 0.07, t: 17.8)

(i: 0.1, a: 0.151, b: 0.008, t: 38.9)

(i: 0.1, a: 1.836, b: 0.114, t: 109.3)

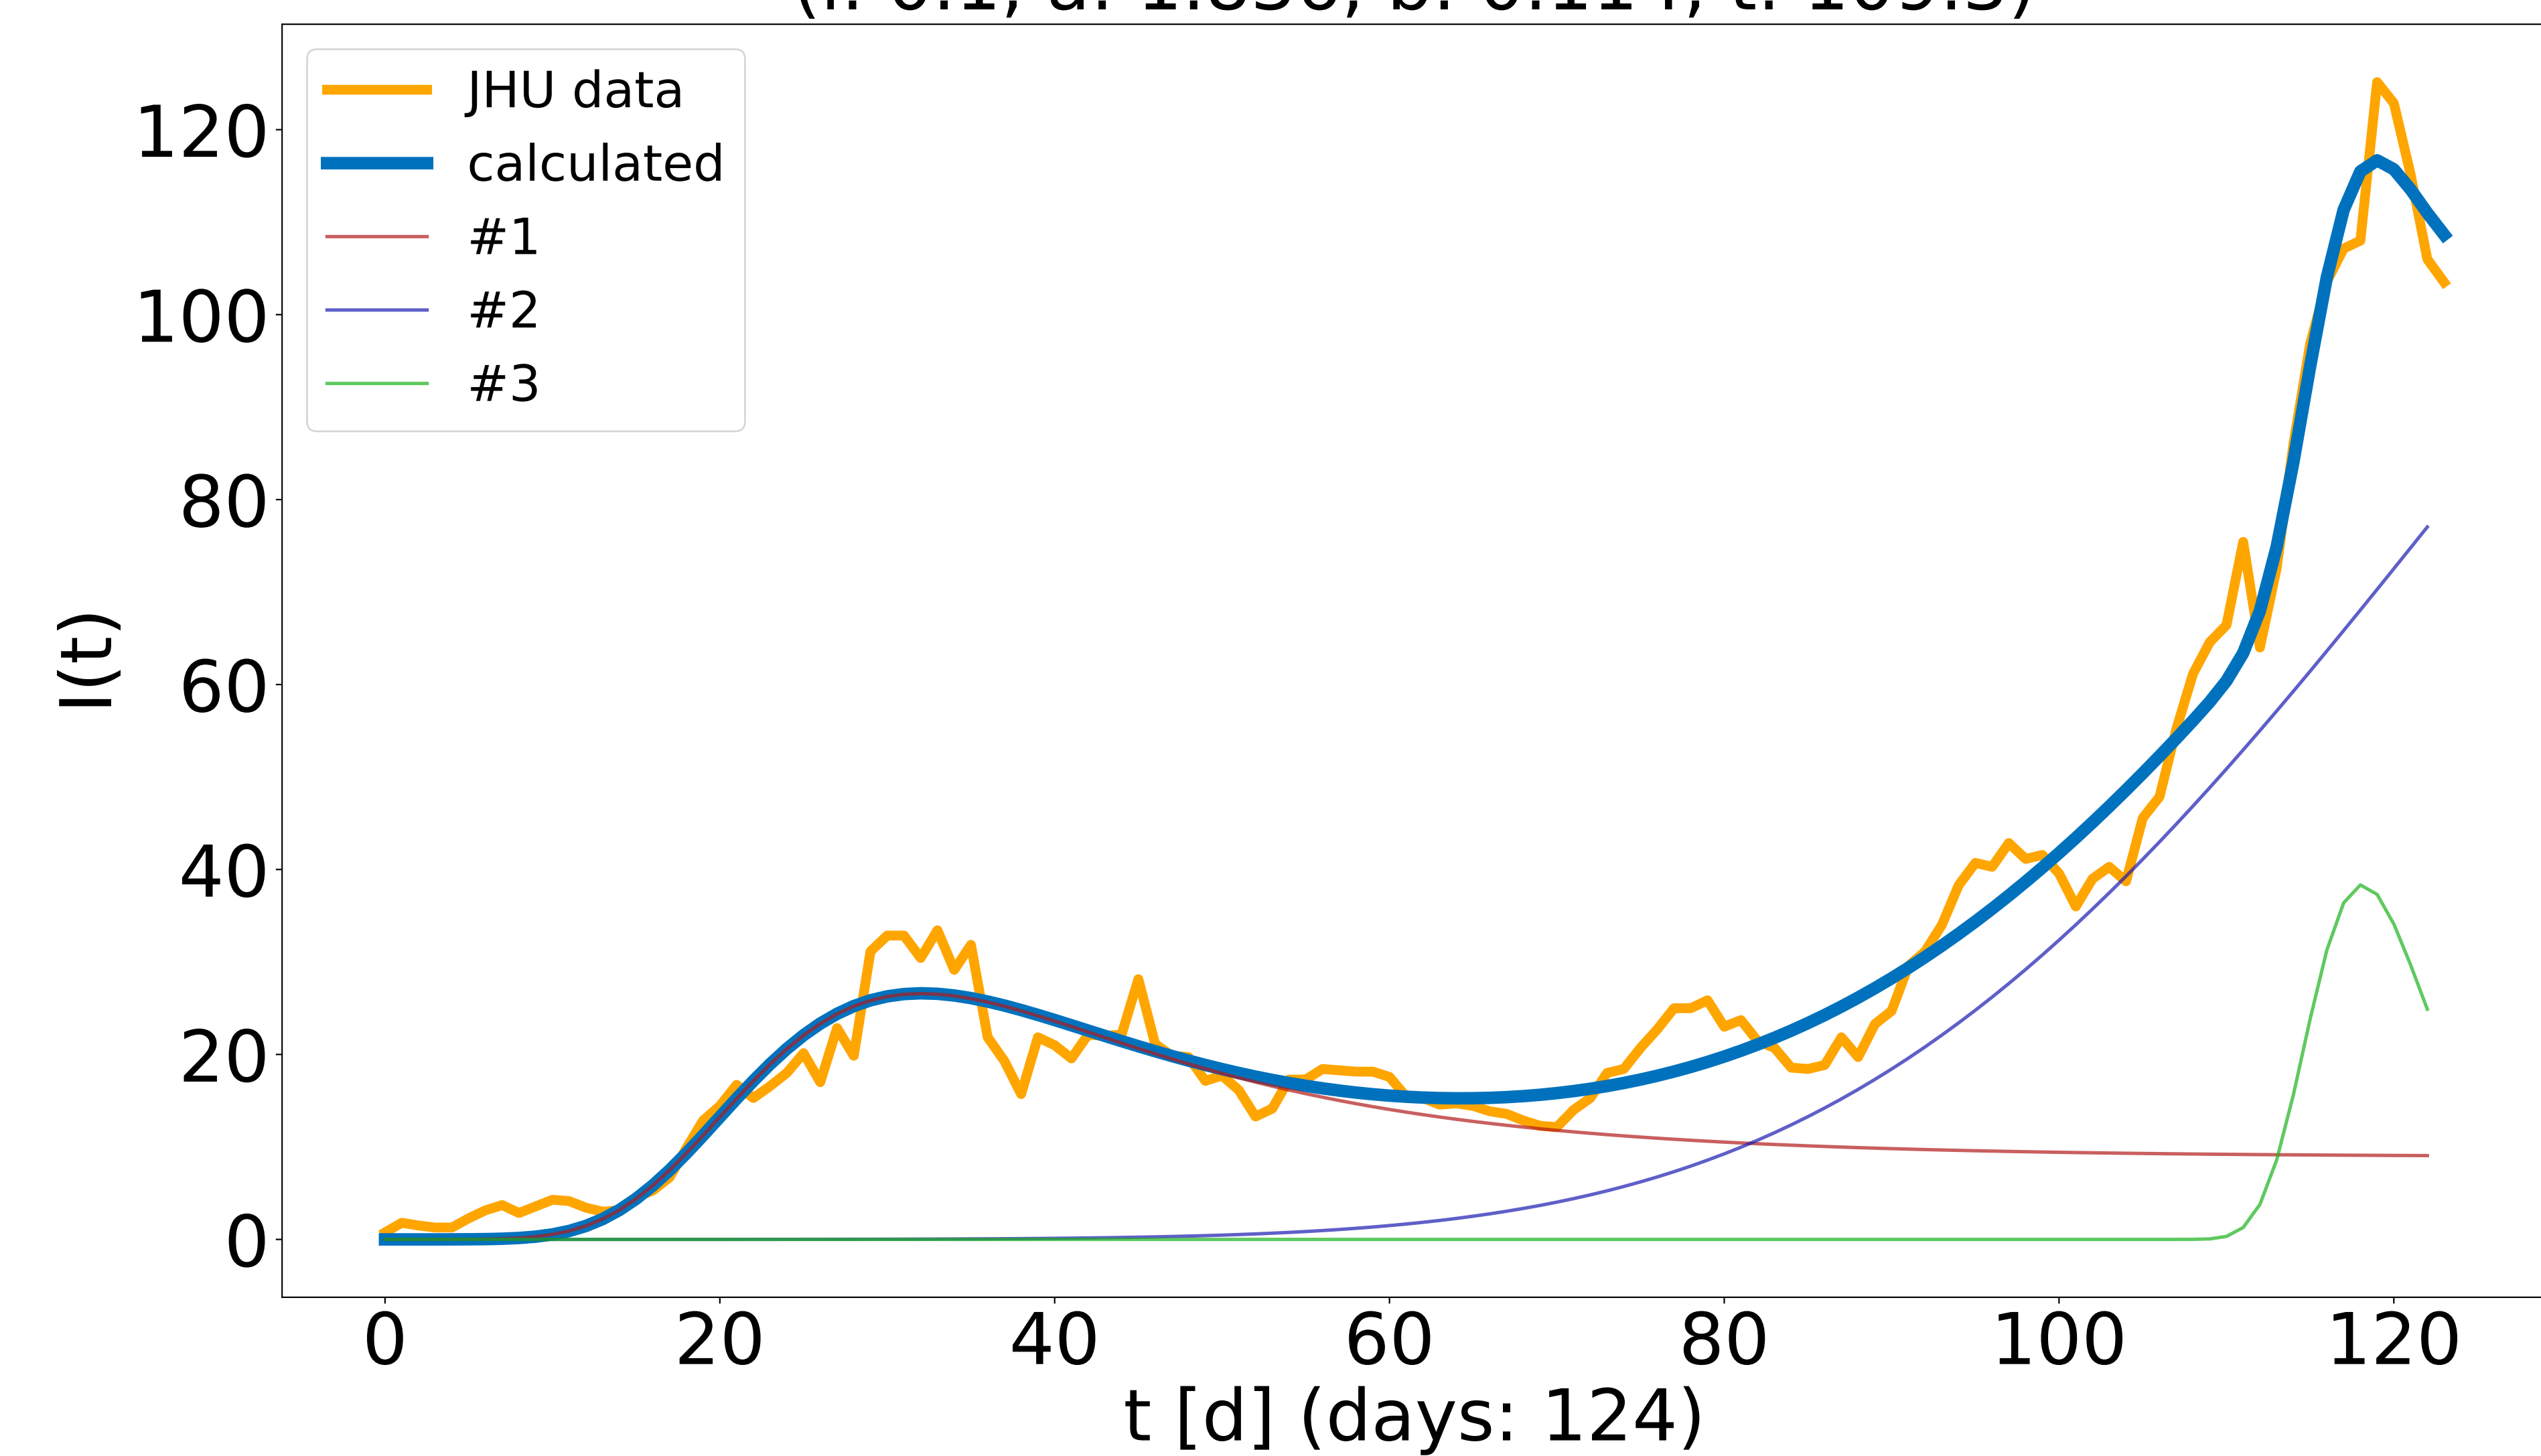

Kern, California, US, Kern ( $R^2 = 0.74$ )  
(i: 28.9, a: 0.001, b: 0.207, t: 28.9)  
(i: 0.1, a: 0.316, b: 0.018, t: 39.1)  
(i: 17.4, a: 2.0, b: 0.572, t: 105.0)

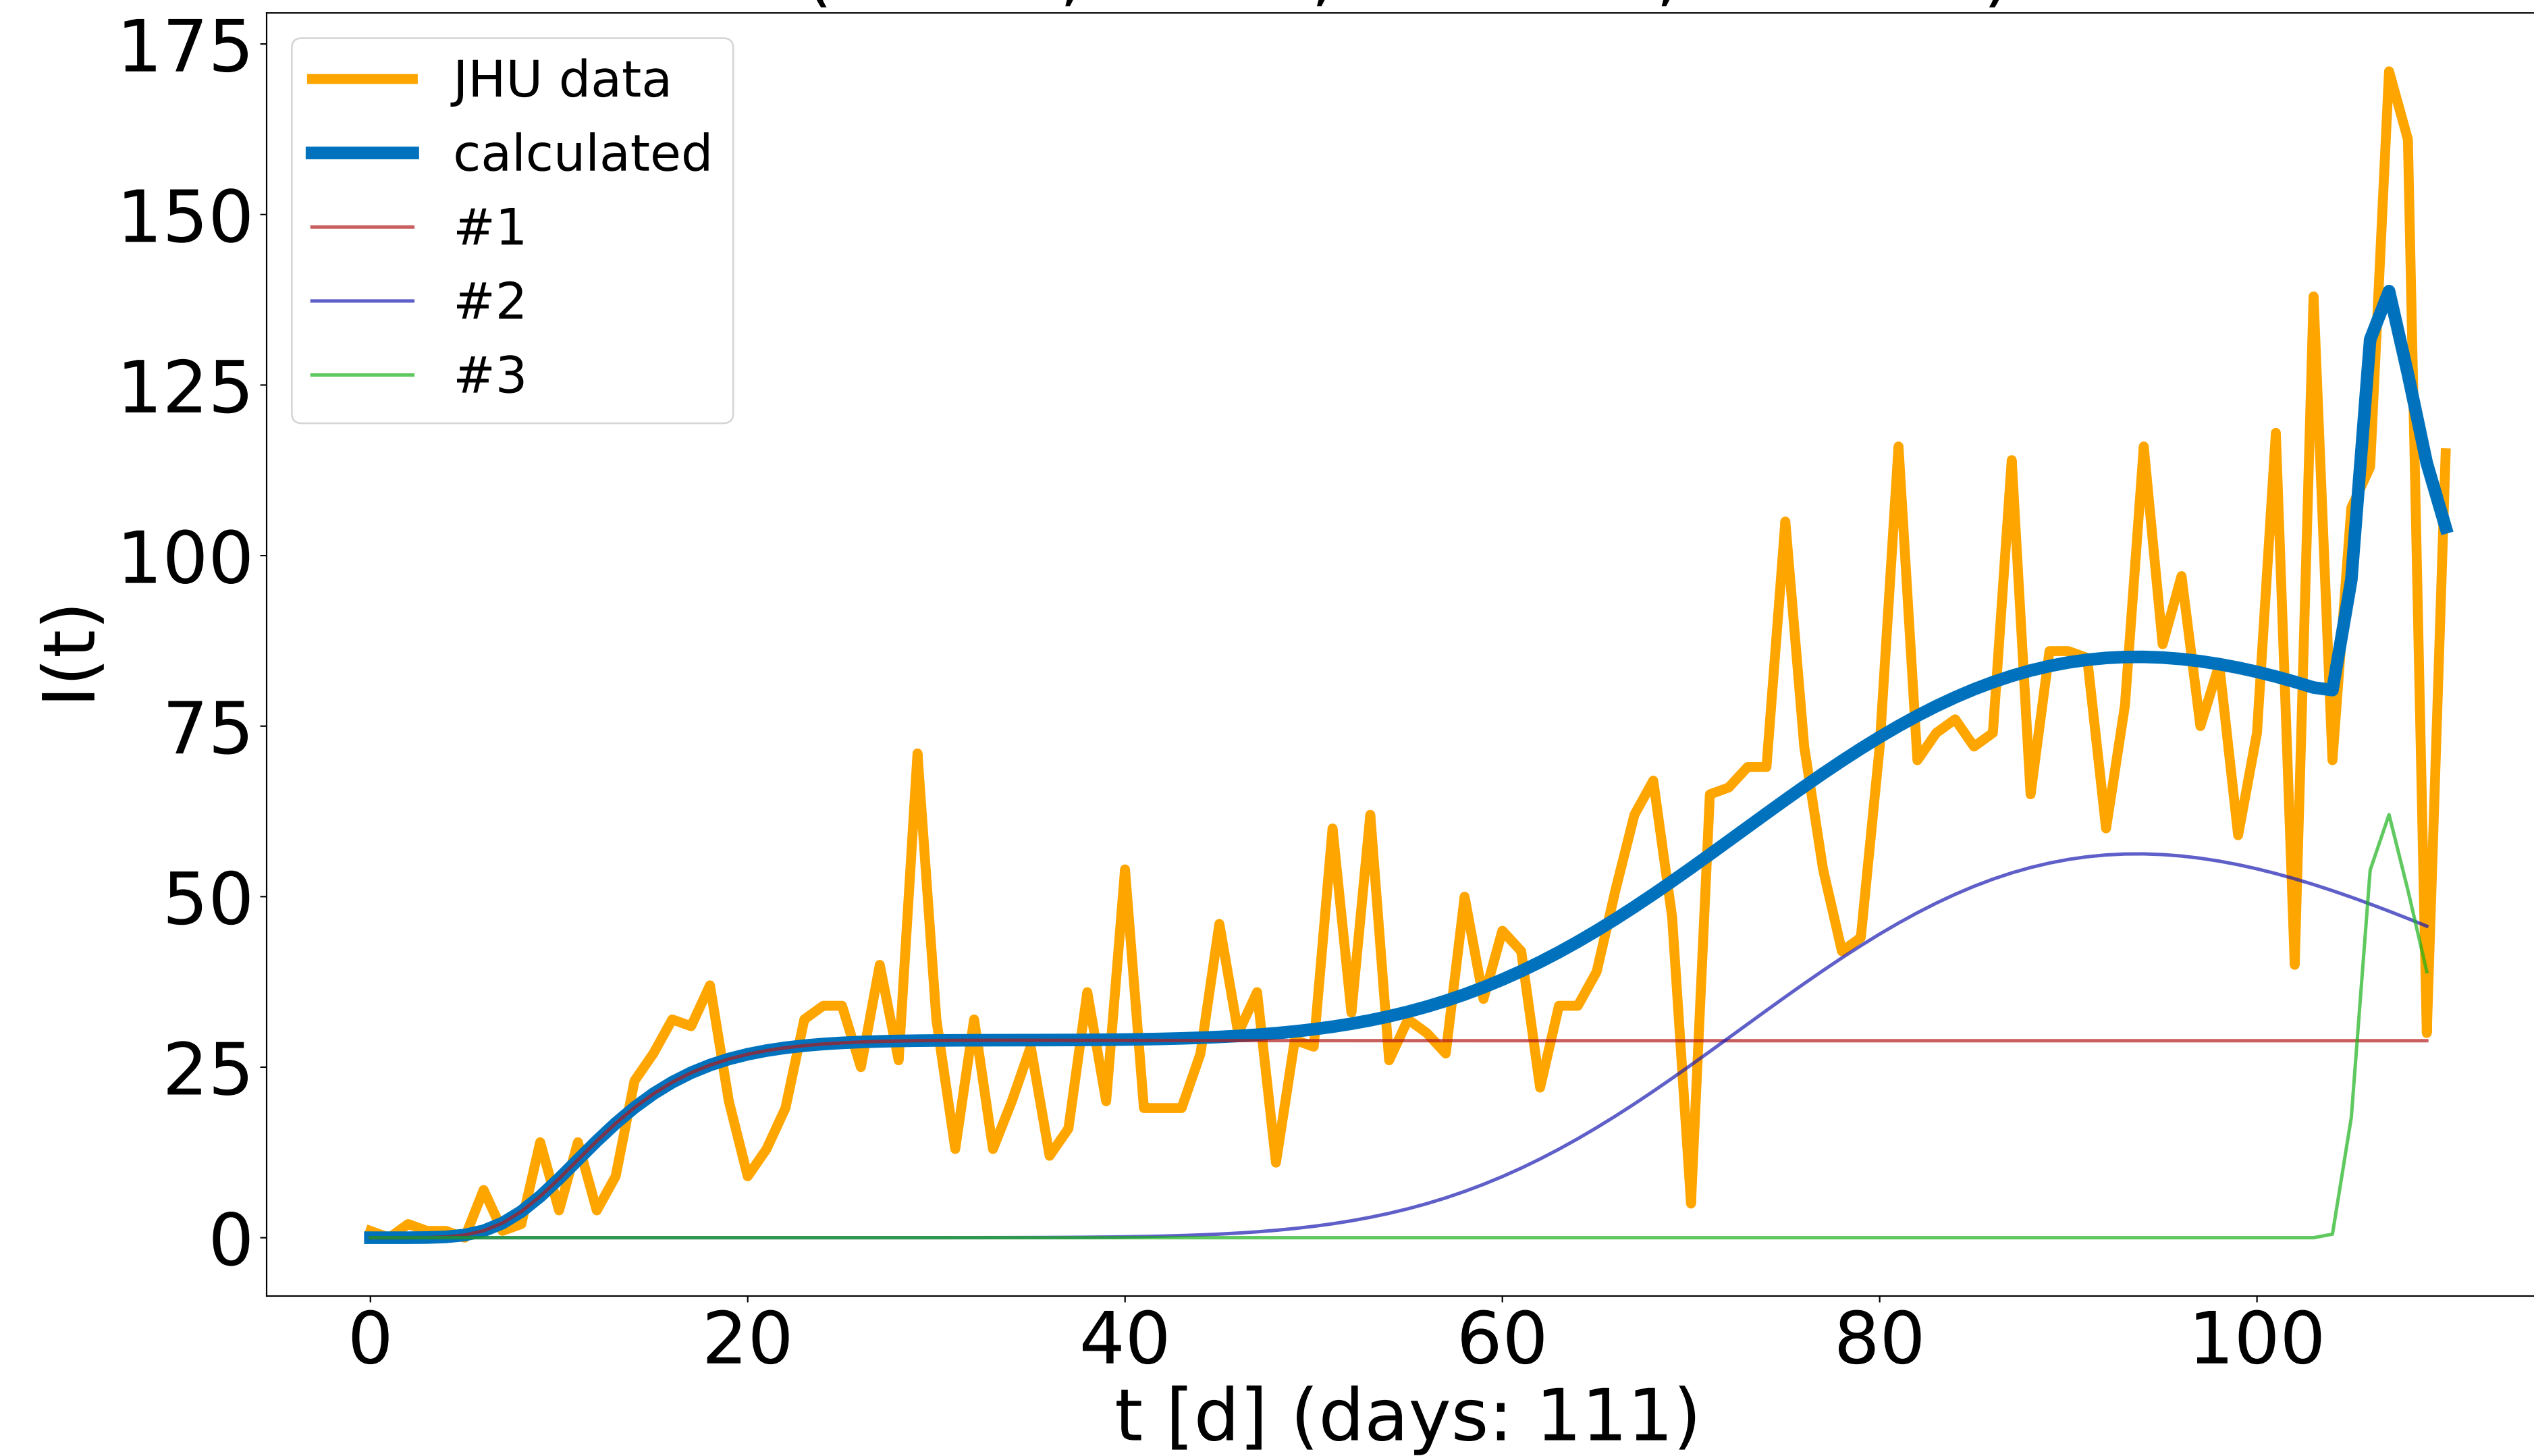

Kern, California, US, Kern ( $R^2 = 0.975$ )  
(i: 5.0, a: 0.573, b: 0.16, t: 10.7)  
(i: 0.6, a: 2.0, b: 0.215, t: 22.3)  
(i: 146.6, a: 0.008, b: 0.009, t: 140.0)

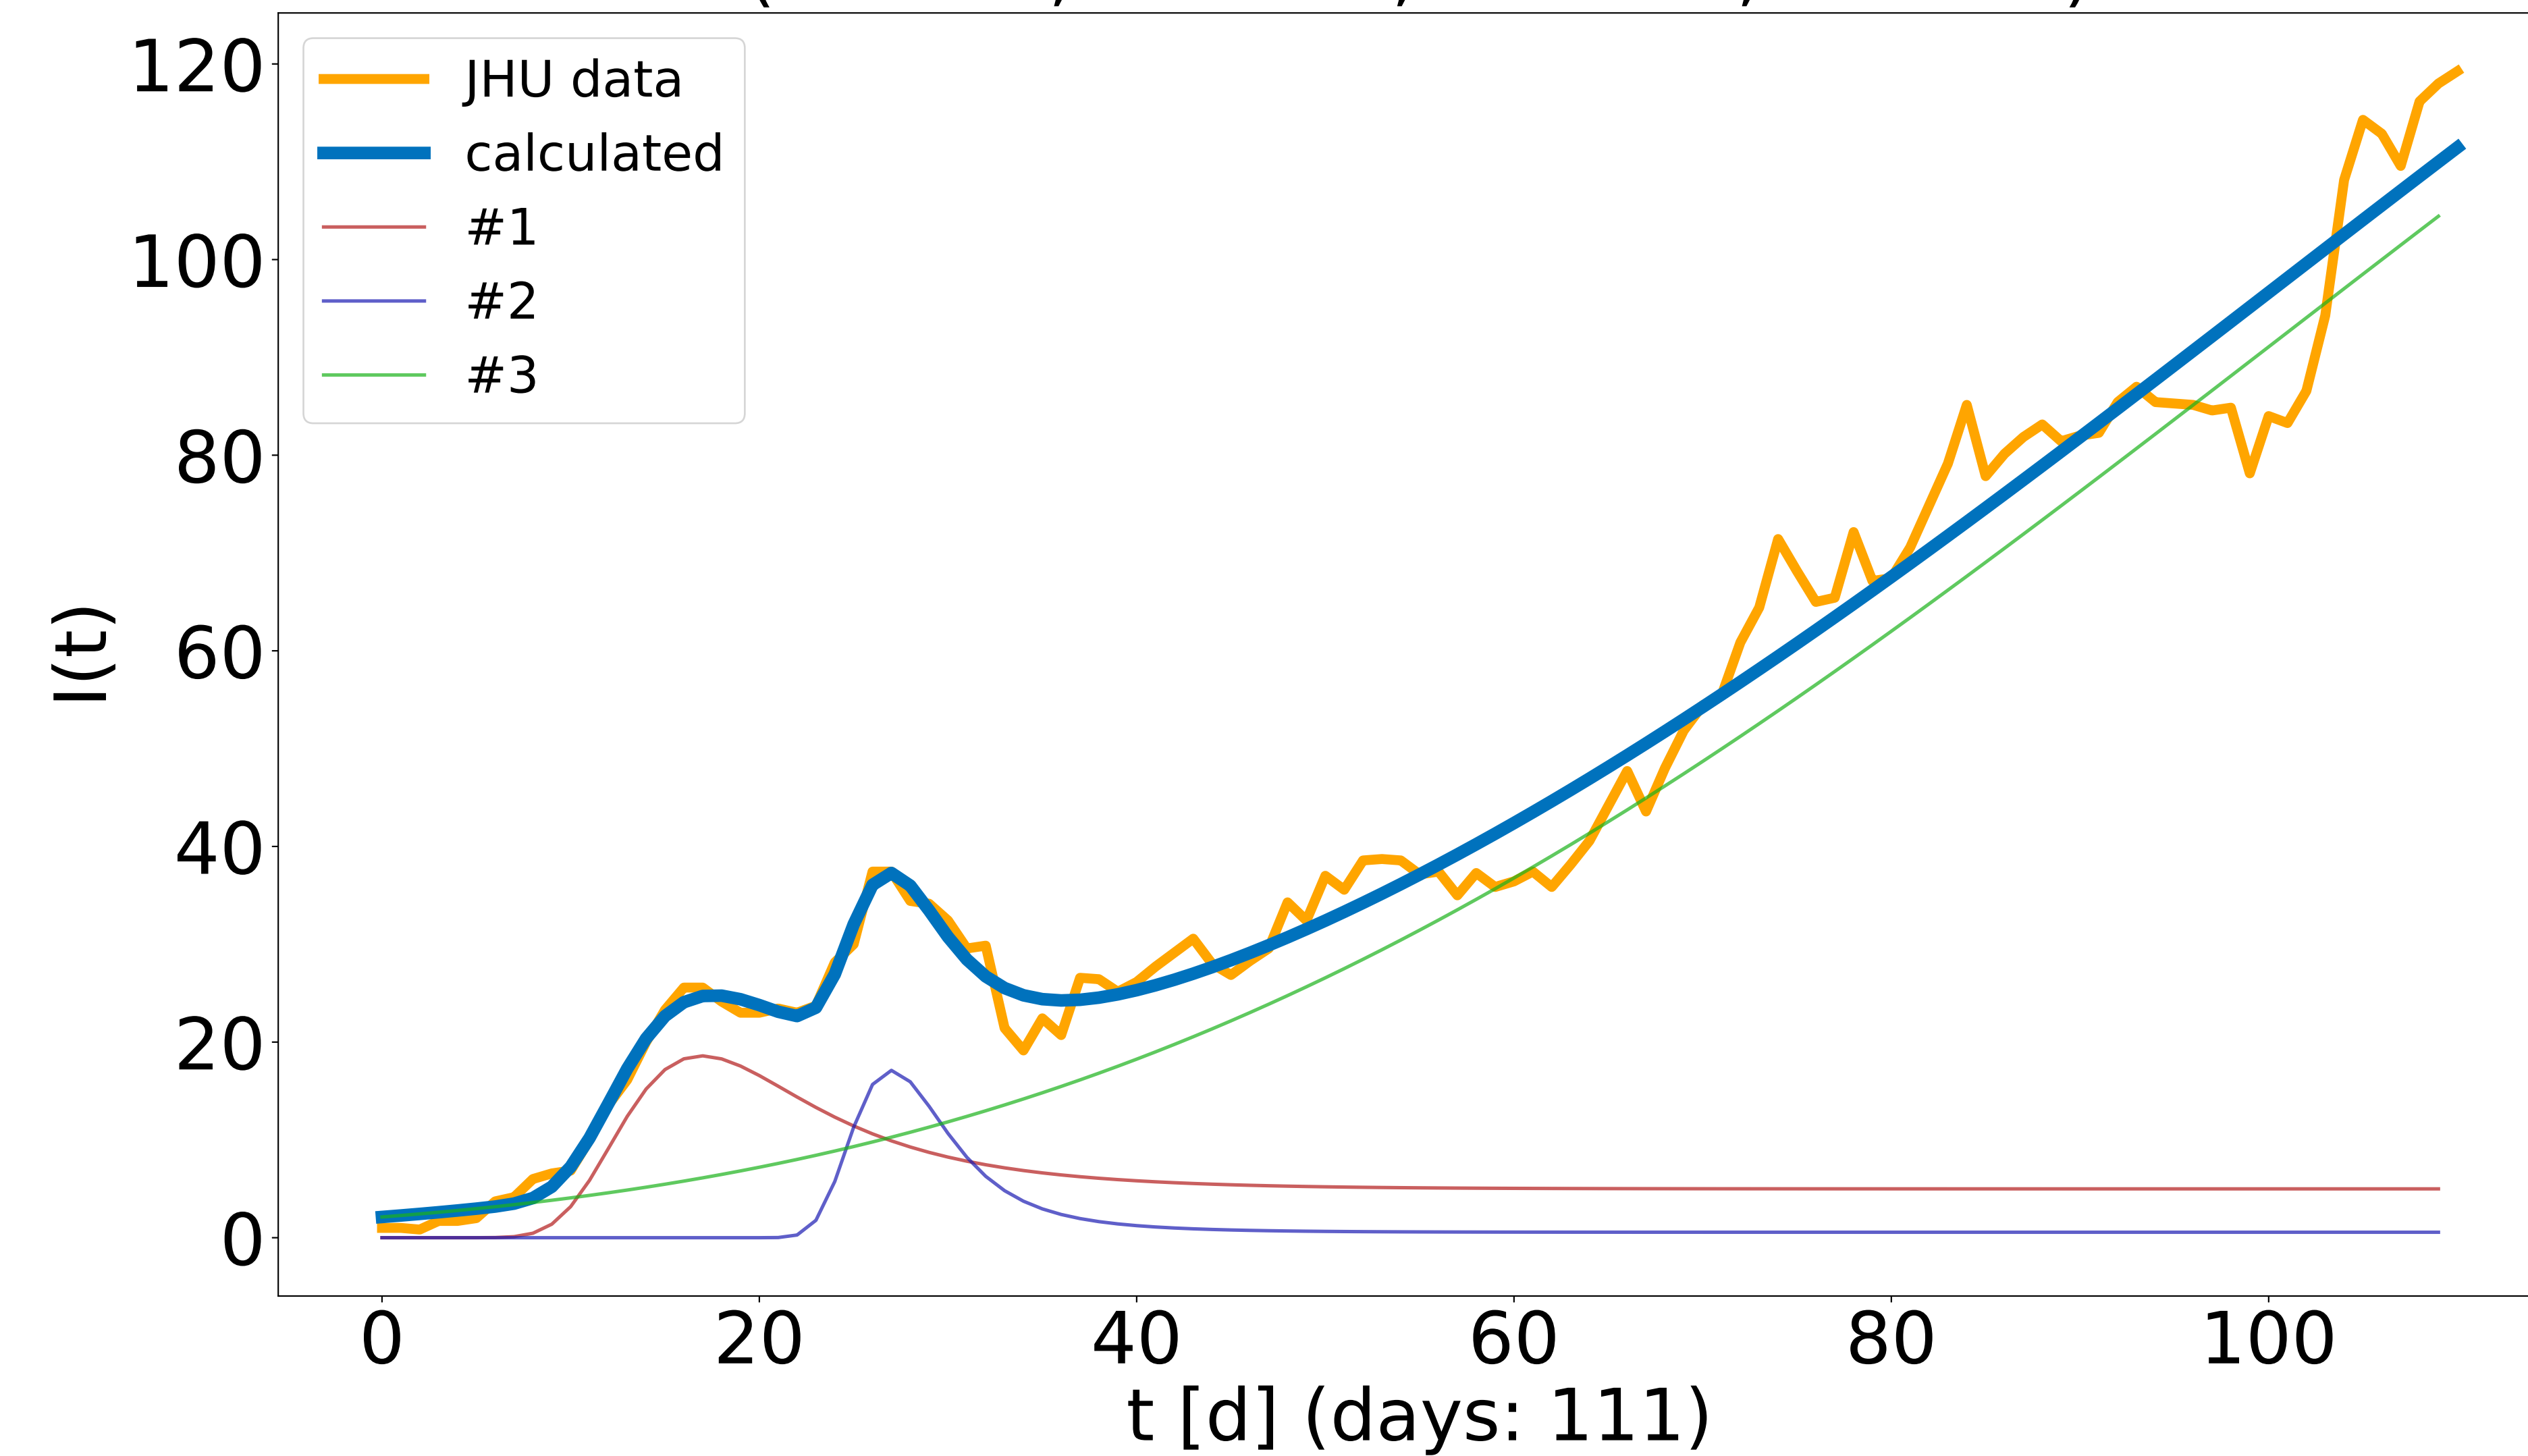

Monterey, California, US, Monterey ( $R^2 = 0.801$ )

(i: 1.4, a: 0.089, b: 0.021, t: 1.0)

(i: 62.7, a: 2.0, b: 1.4, t: 108.9)

(i: 47.0, a: 0.001, b: 0.06, t: 126.8)

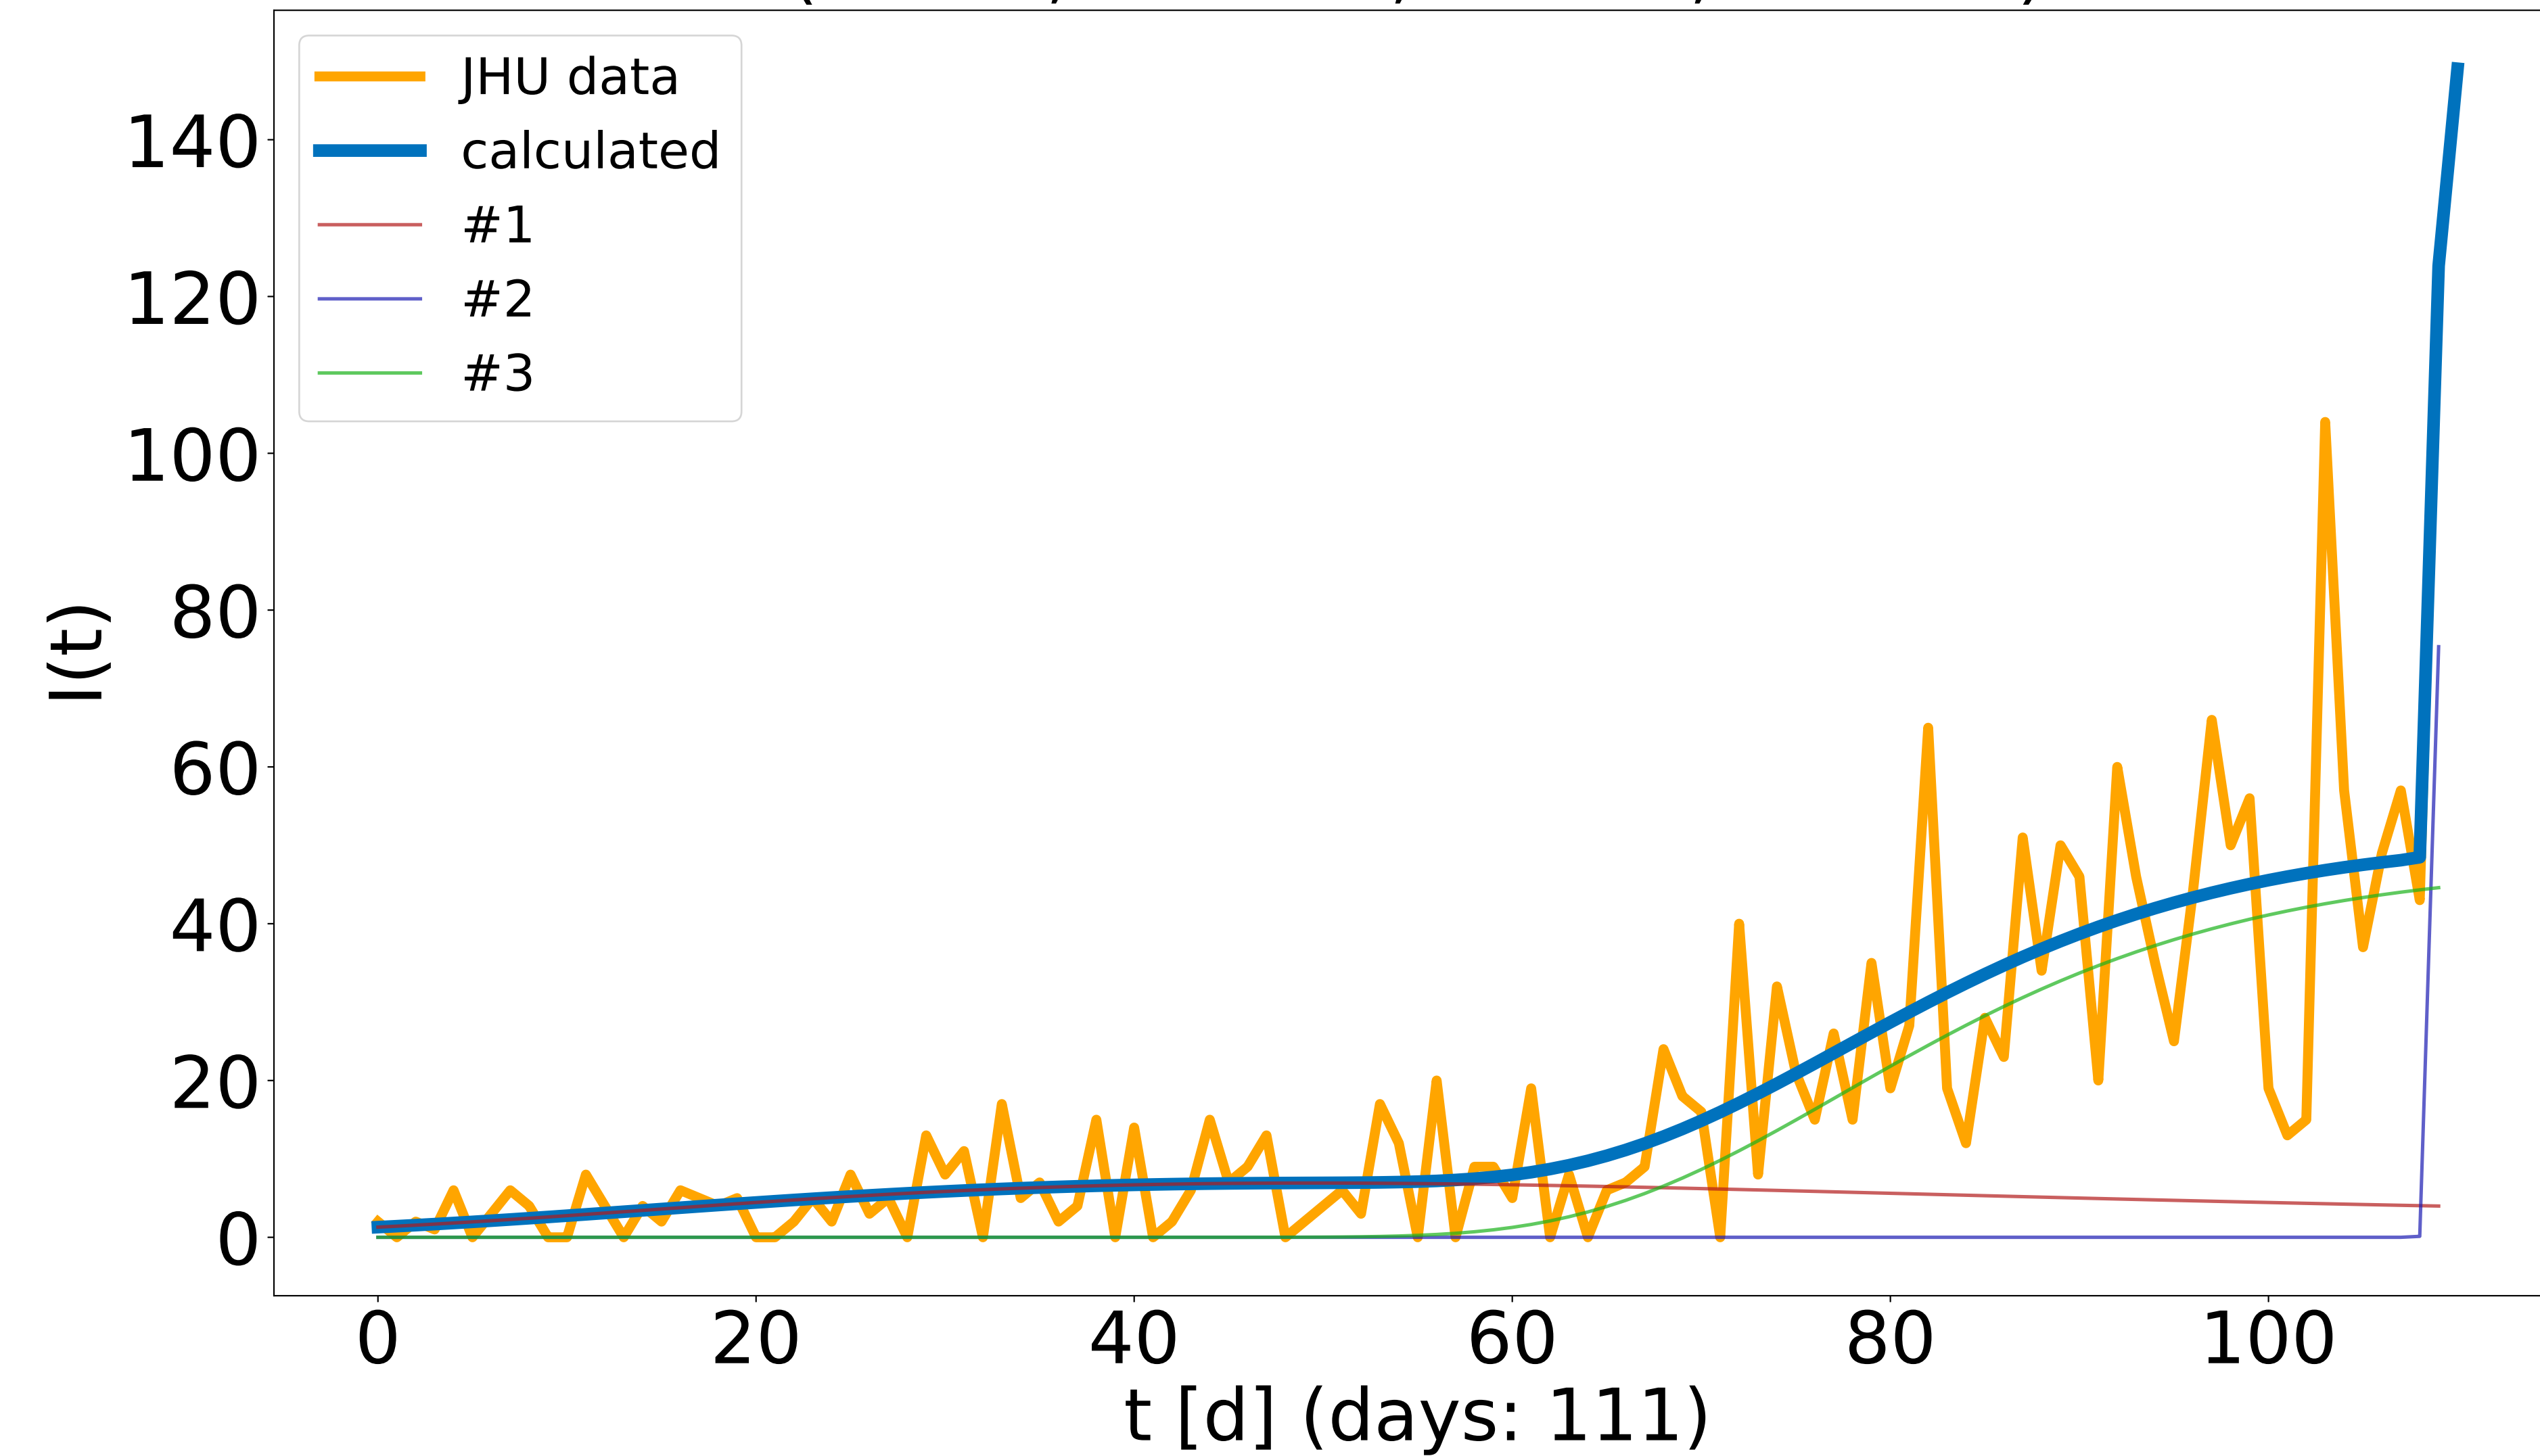

Monterey, California, US, Monterey ( $R^2 = 0.991$ )

(i: 1.5, a: 0.083, b: 0.02, t: 1.0)

(i: 3.4, a: 0.182, b: 0.028, t: 64.1)

(i: 59.5, a: 0.001, b: 0.363, t: 118.2)

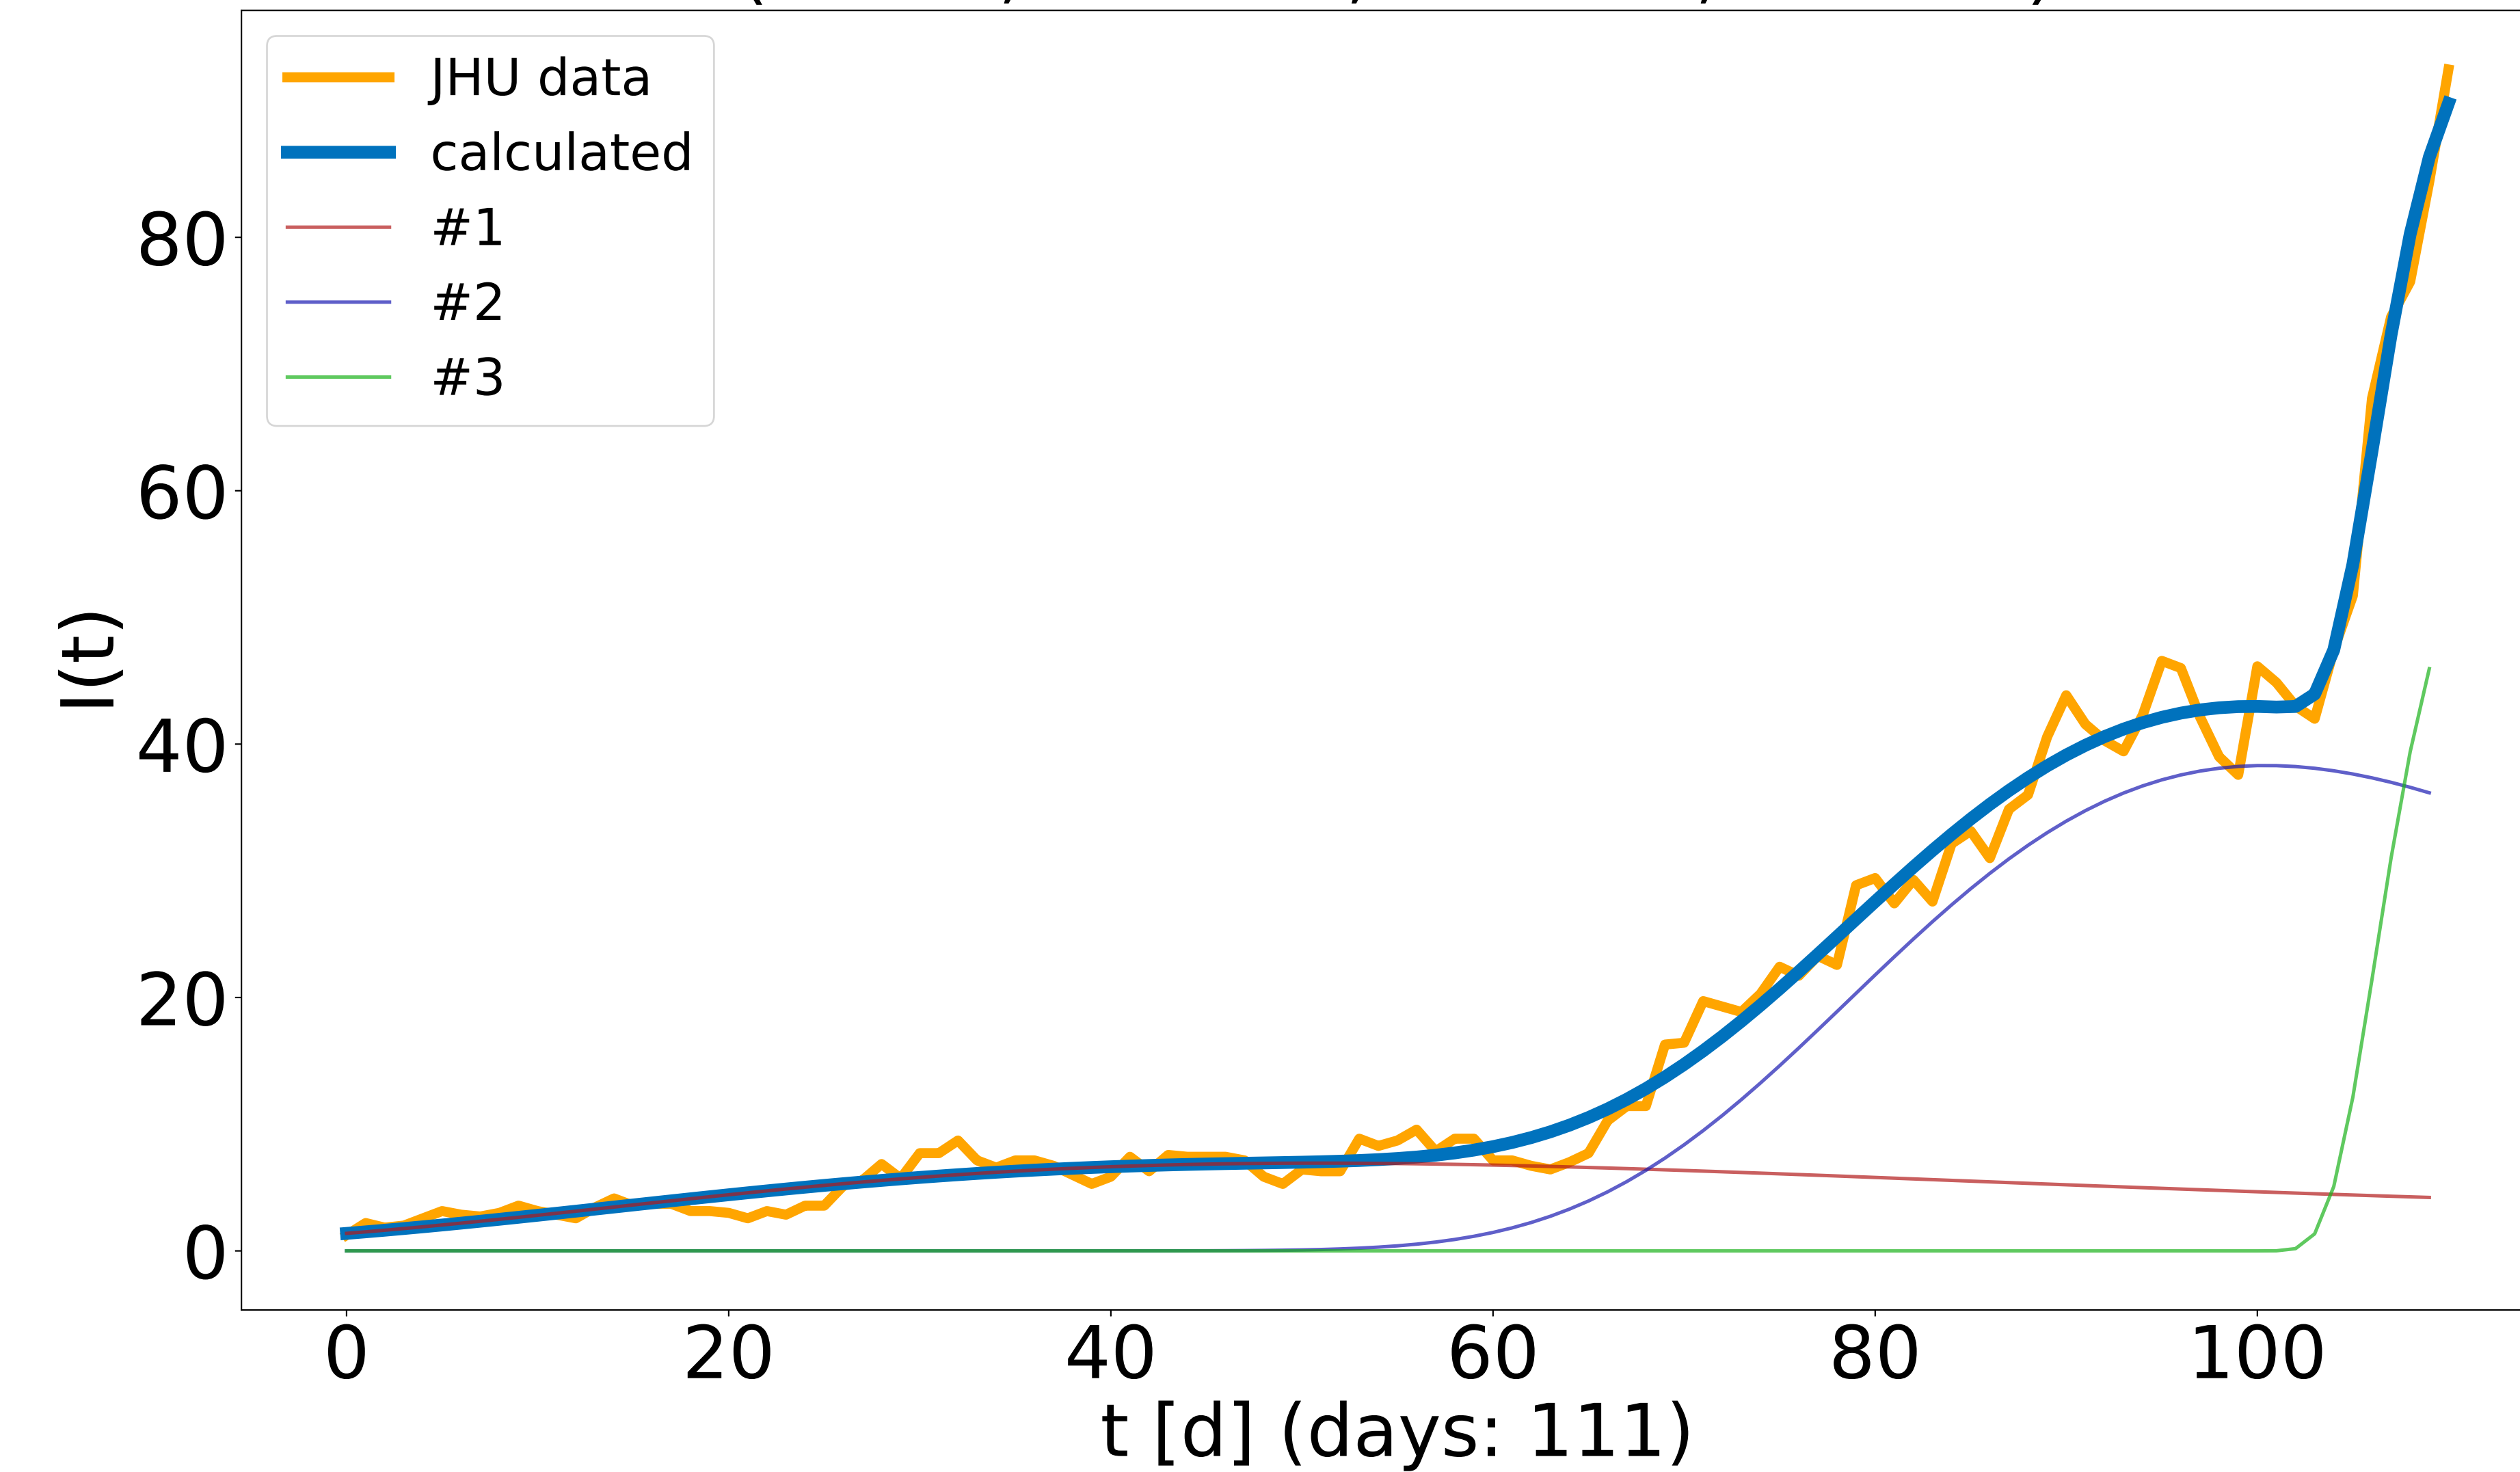

Weld, Colorado, US, Weld ( $R^2 = 0.768$ )  
(i: 4.9, a: 0.253, b: 0.041, t: 5.1)  
(i: 0.7, a: 1.268, b: 0.119, t: 36.2)  
(i: 3.6, a: 1.982, b: 1.399, t: 102.6)

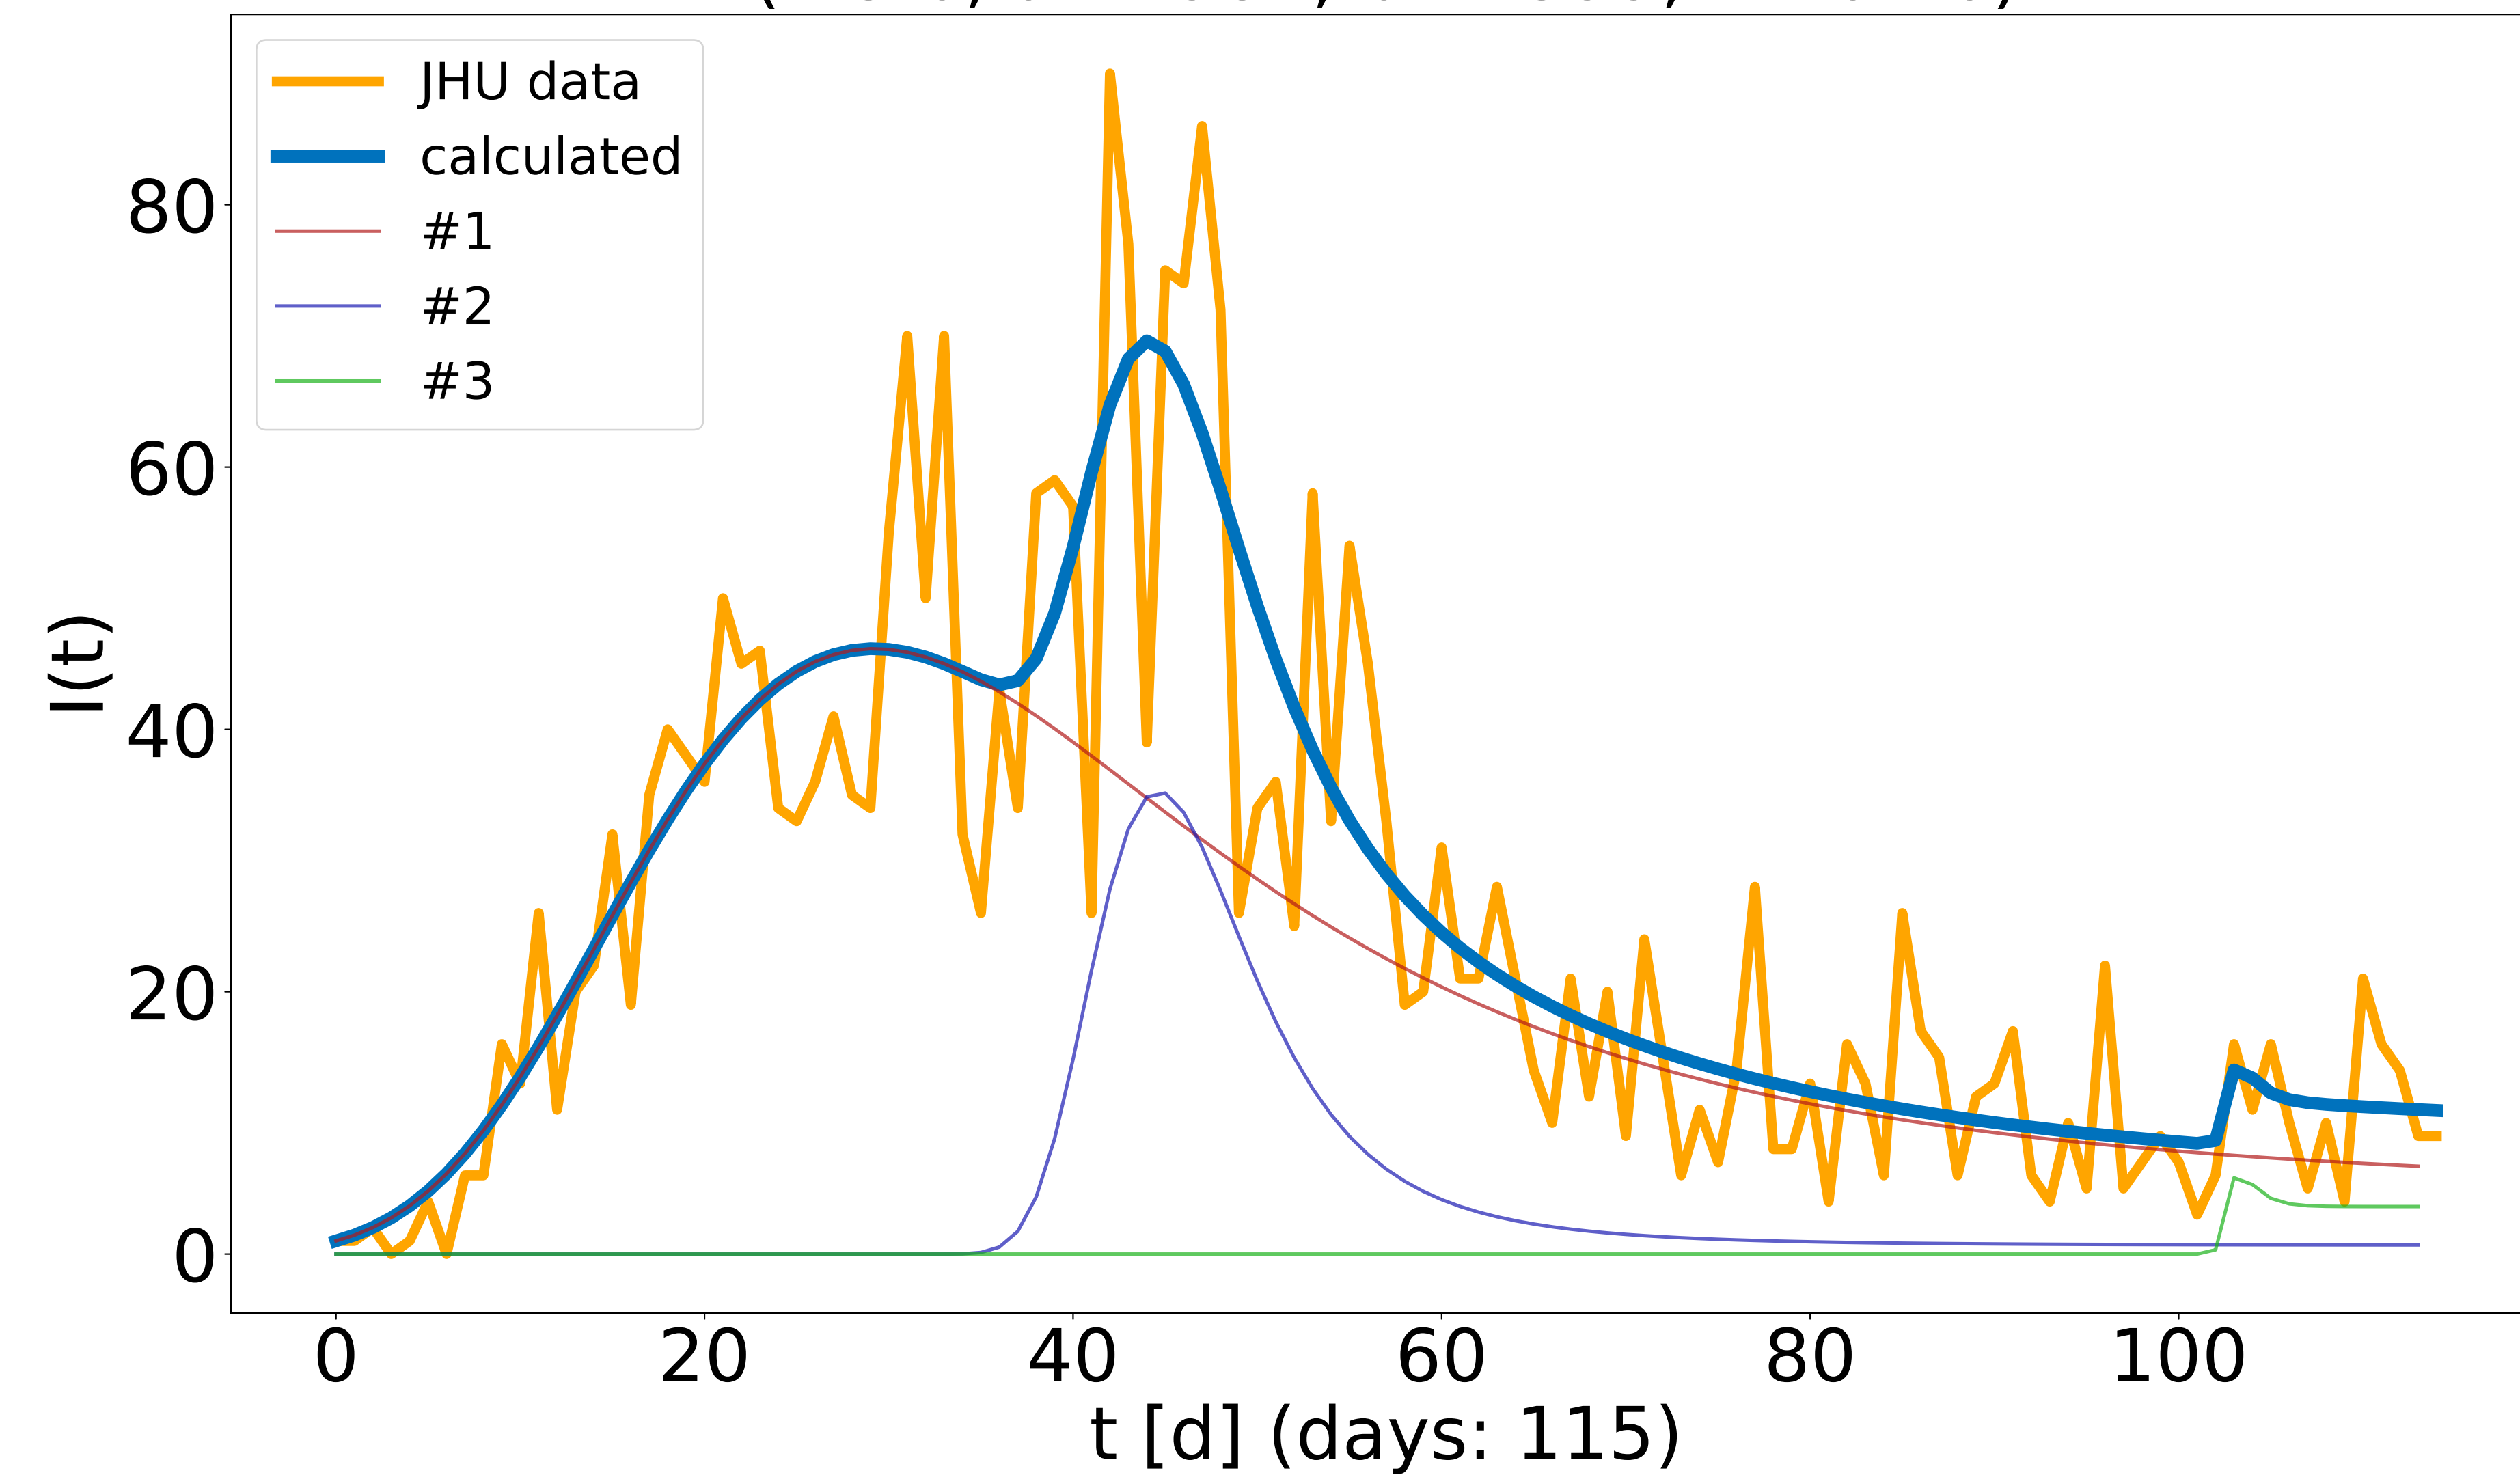

Weld, Colorado, US, Weld ( $R^2 = 0.981$ )  
(i: 4.8, a: 0.251, b: 0.041, t: 4.9)  
(i: 0.7, a: 1.142, b: 0.109, t: 35.5)  
(i: 5.7, a: 0.001, b: 0.203, t: 124.3)

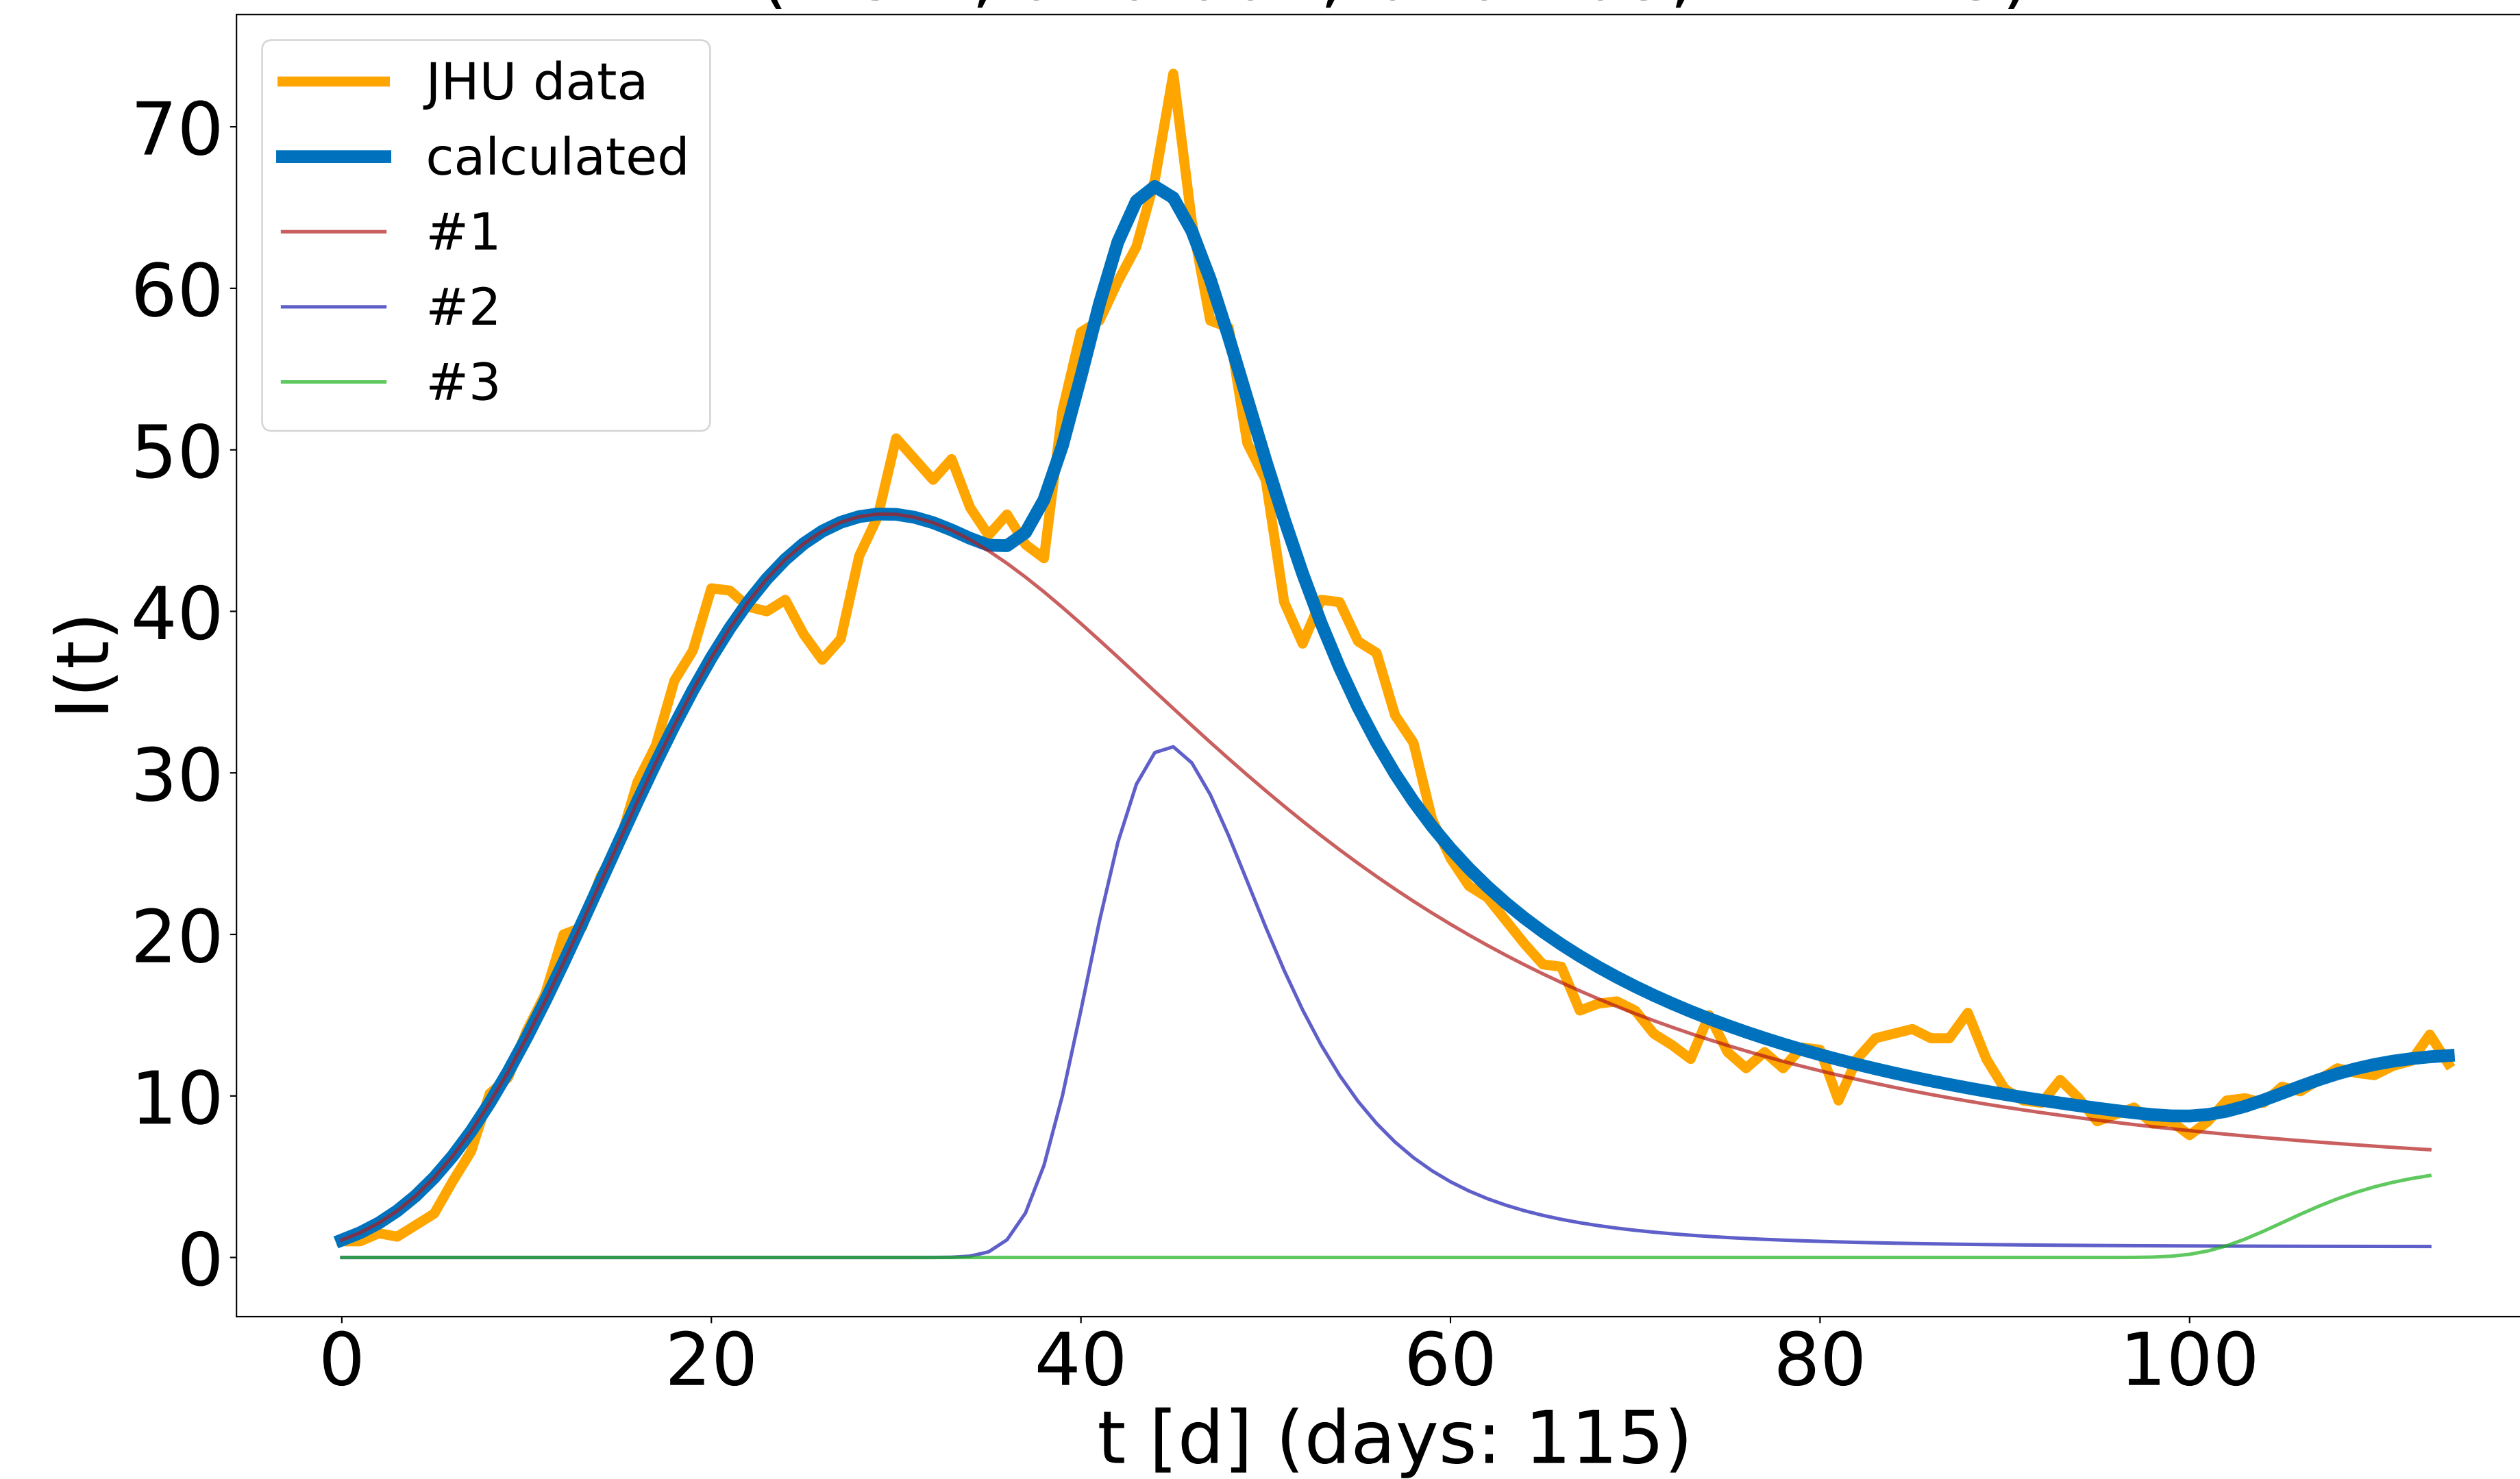



Hartford, Connecticut, US, Hartford ( $R^2 = 0.595$ )

(i: 13.0, a: 0.279, b: 0.036, t: 9.4)

(i: 2.5, a: 2.0, b: 0.182, t: 57.7)

(i: 0.1, a: 1.978, b: 0.42, t: 103.1)

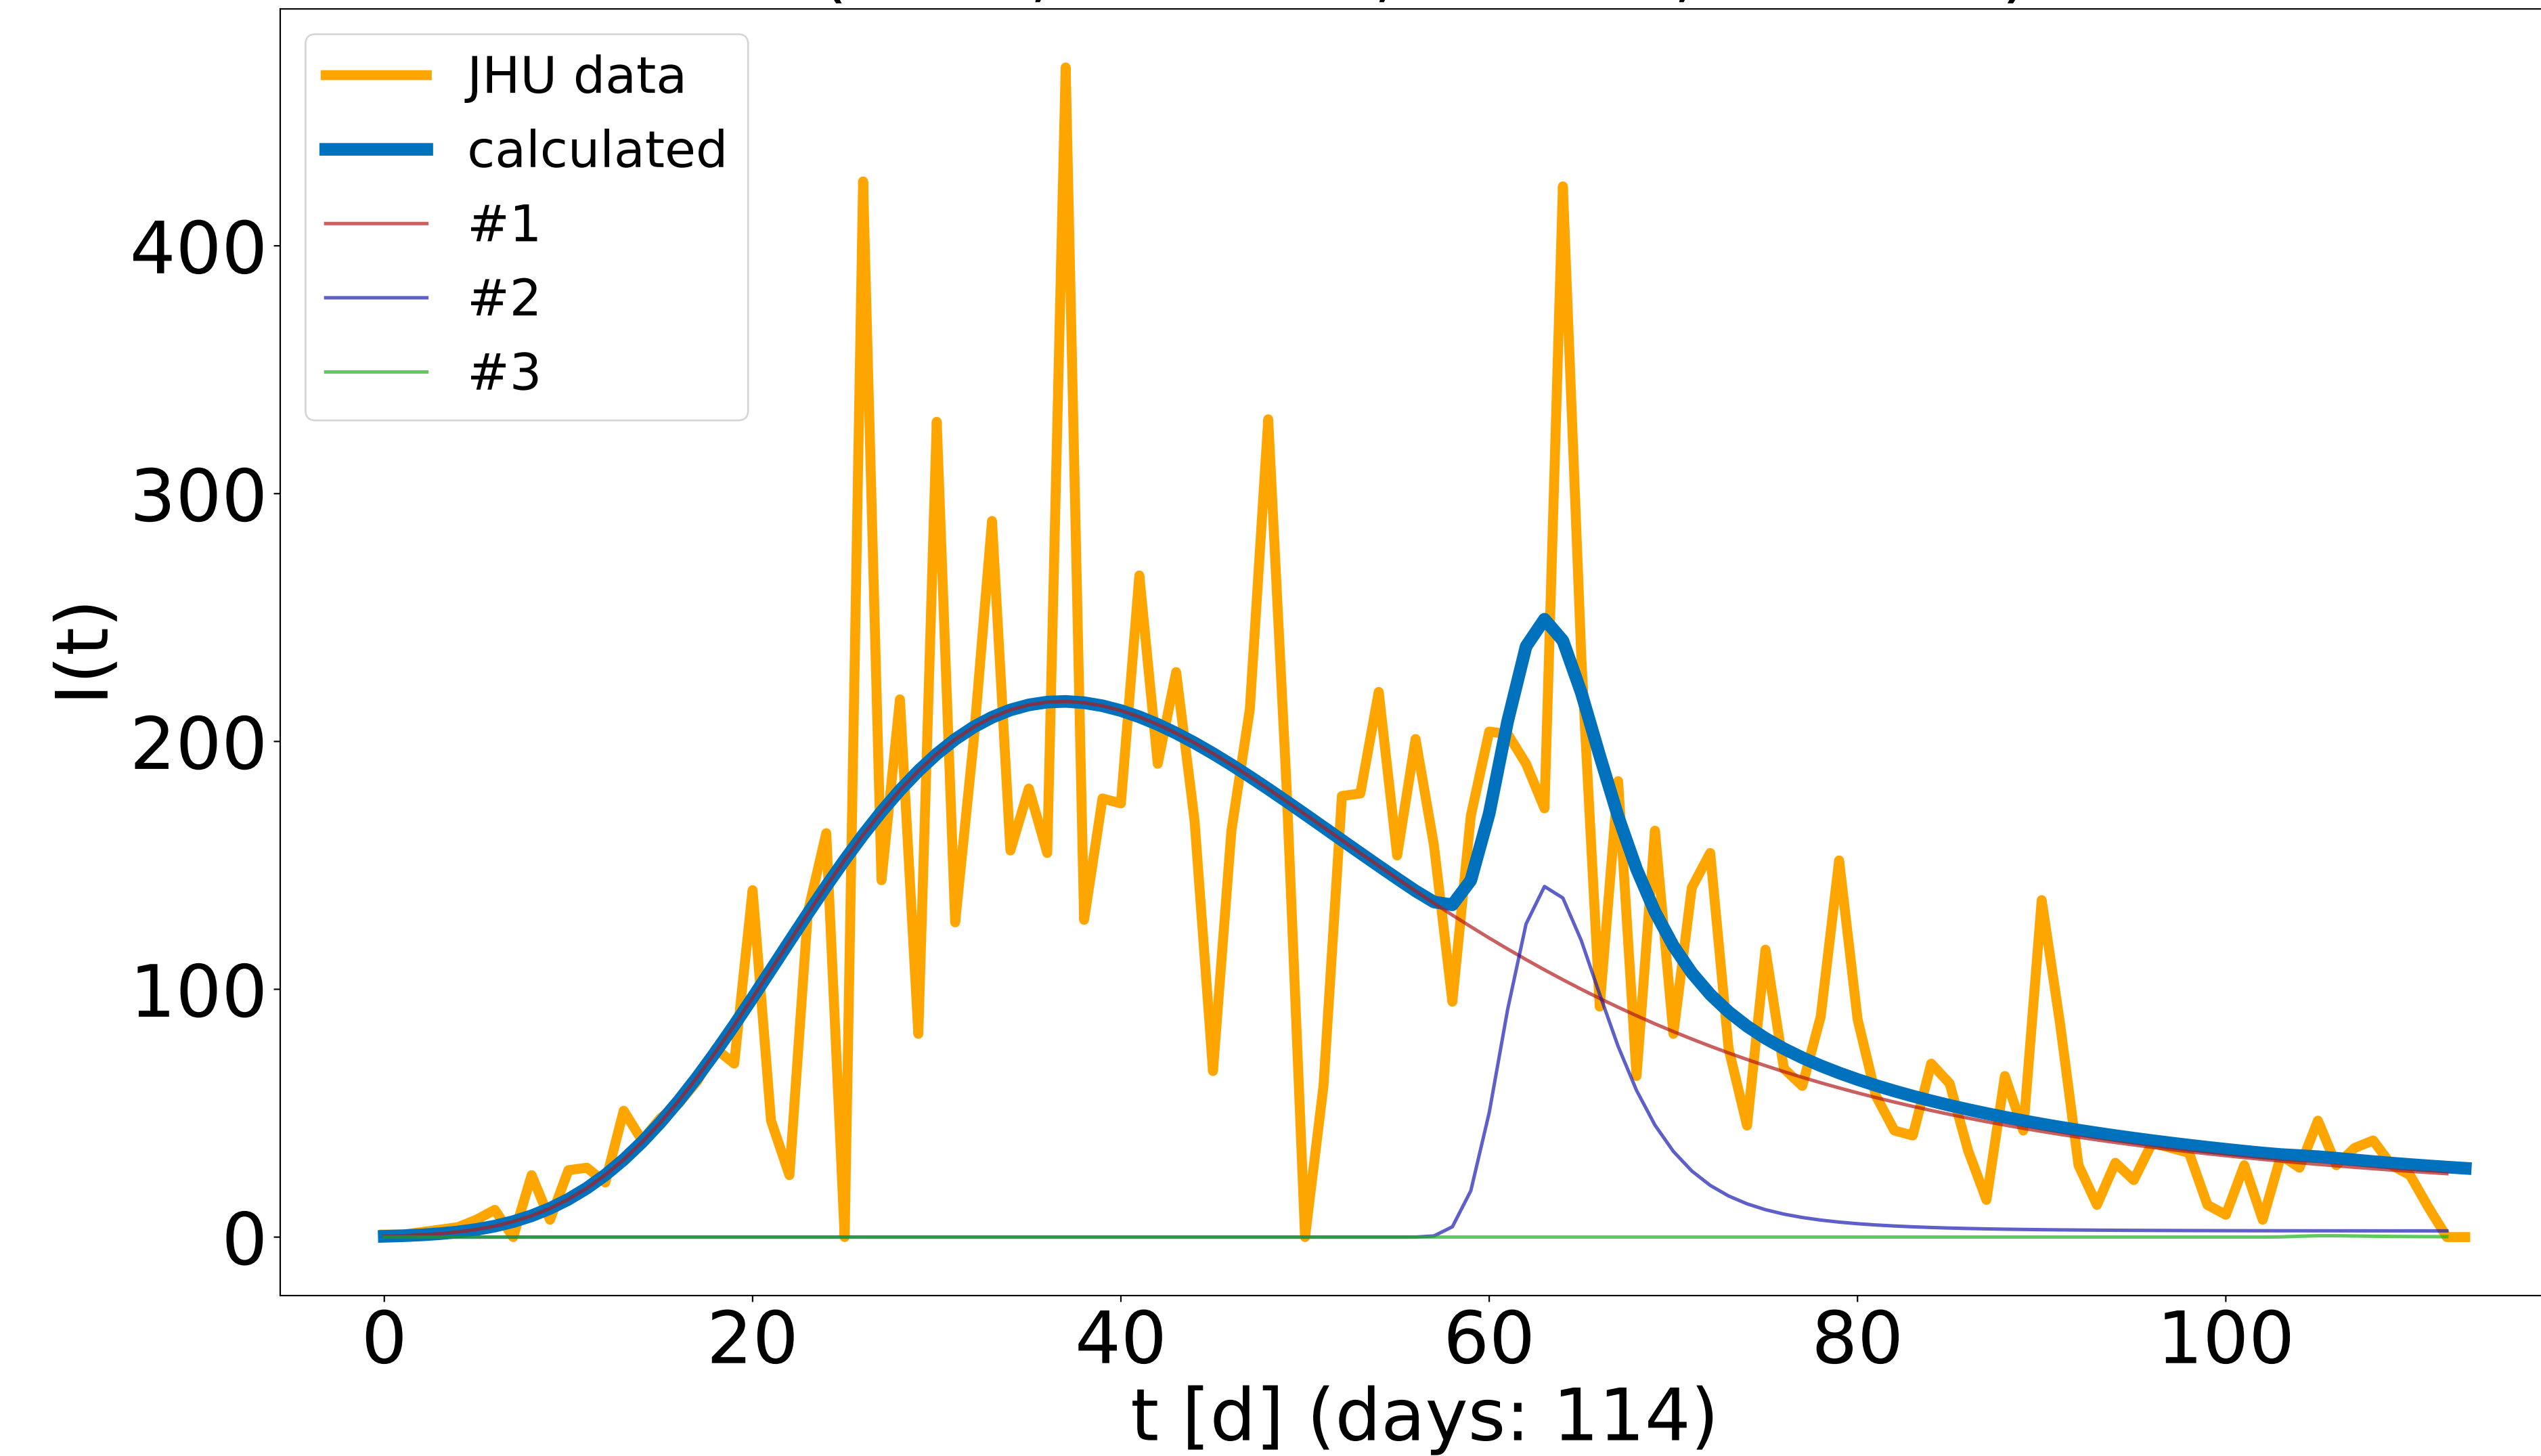

Hartford, Connecticut, US, Hartford ( $R^2 = 0.98$ )

(i: 3.5, a: 0.259, b: 0.025, t: 1.0)

(i: 0.1, a: 1.06, b: 0.059, t: 14.2)

(i: 0.1, a: 1.818, b: 0.097, t: 52.6)

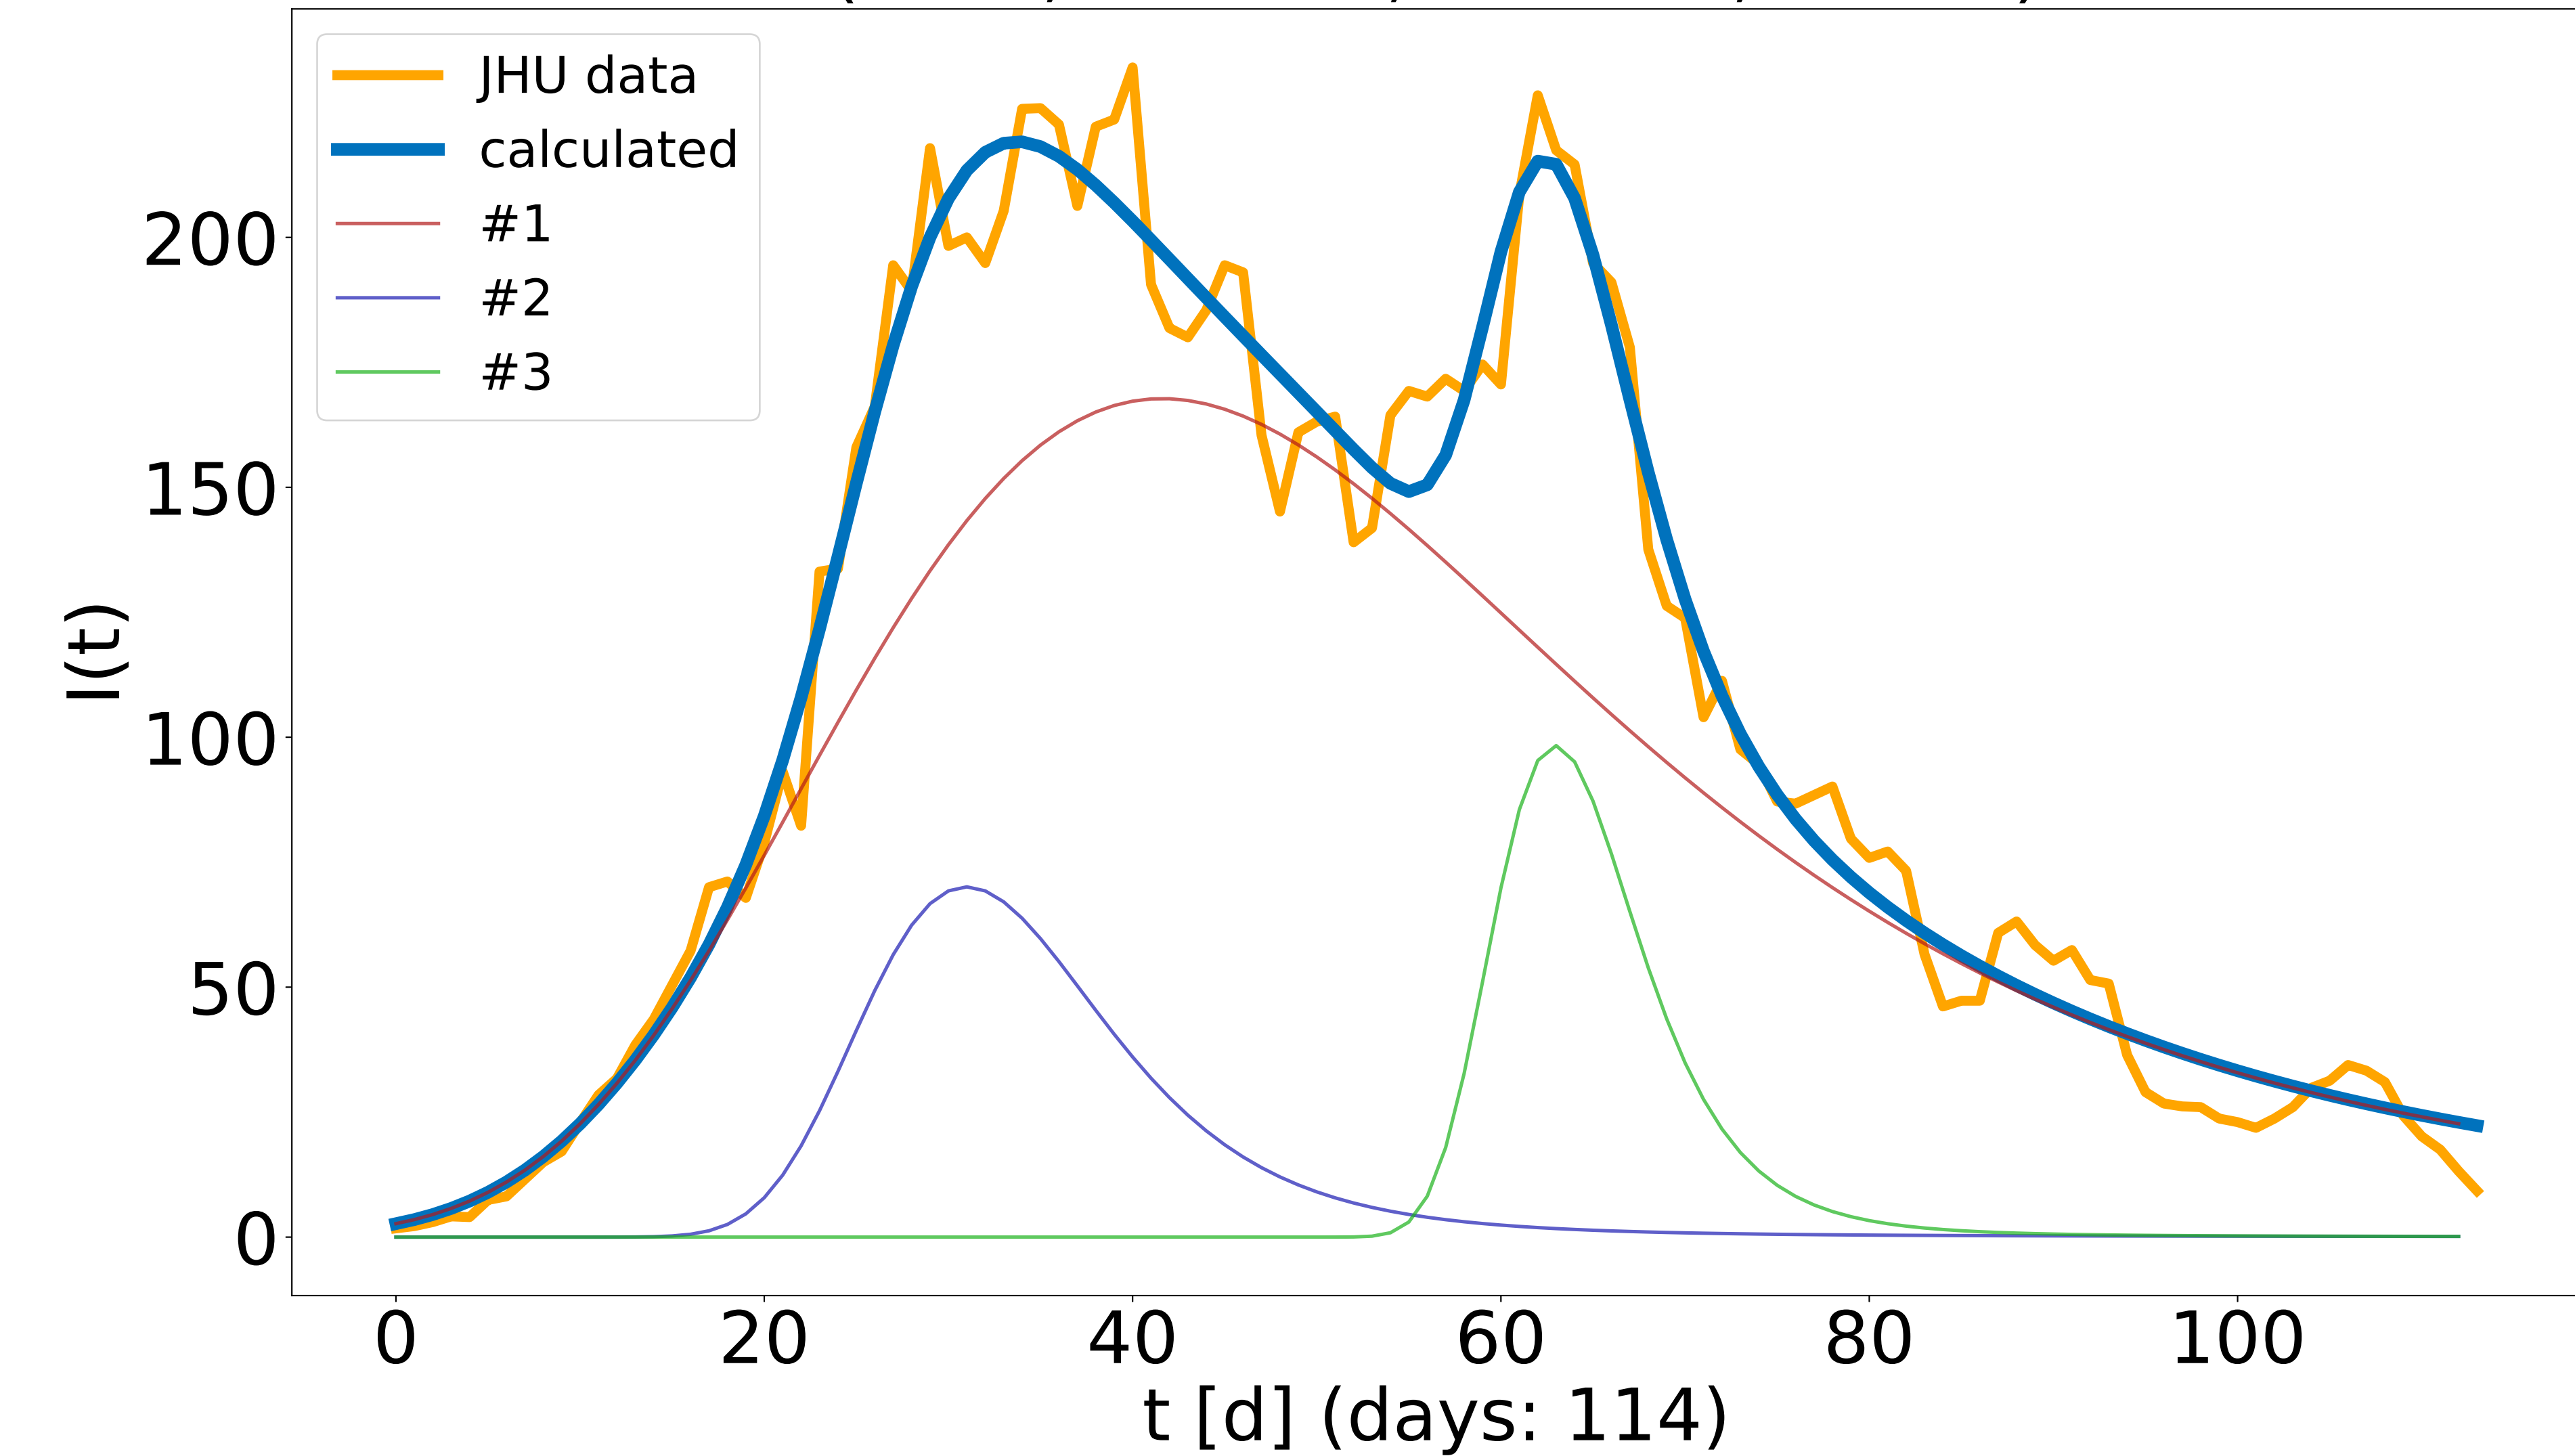

Santa Rosa, Florida, US, Santa Rosa ( $R^2 = 0.691$ )

(i: 0.3, a: 2.0, b: 0.233, t: 19.8)

(i: 3.1, a: 2.0, b: 0.574, t: 33.3)

(i: 0.1, a: 1.01, b: 0.058, t: 103.5)

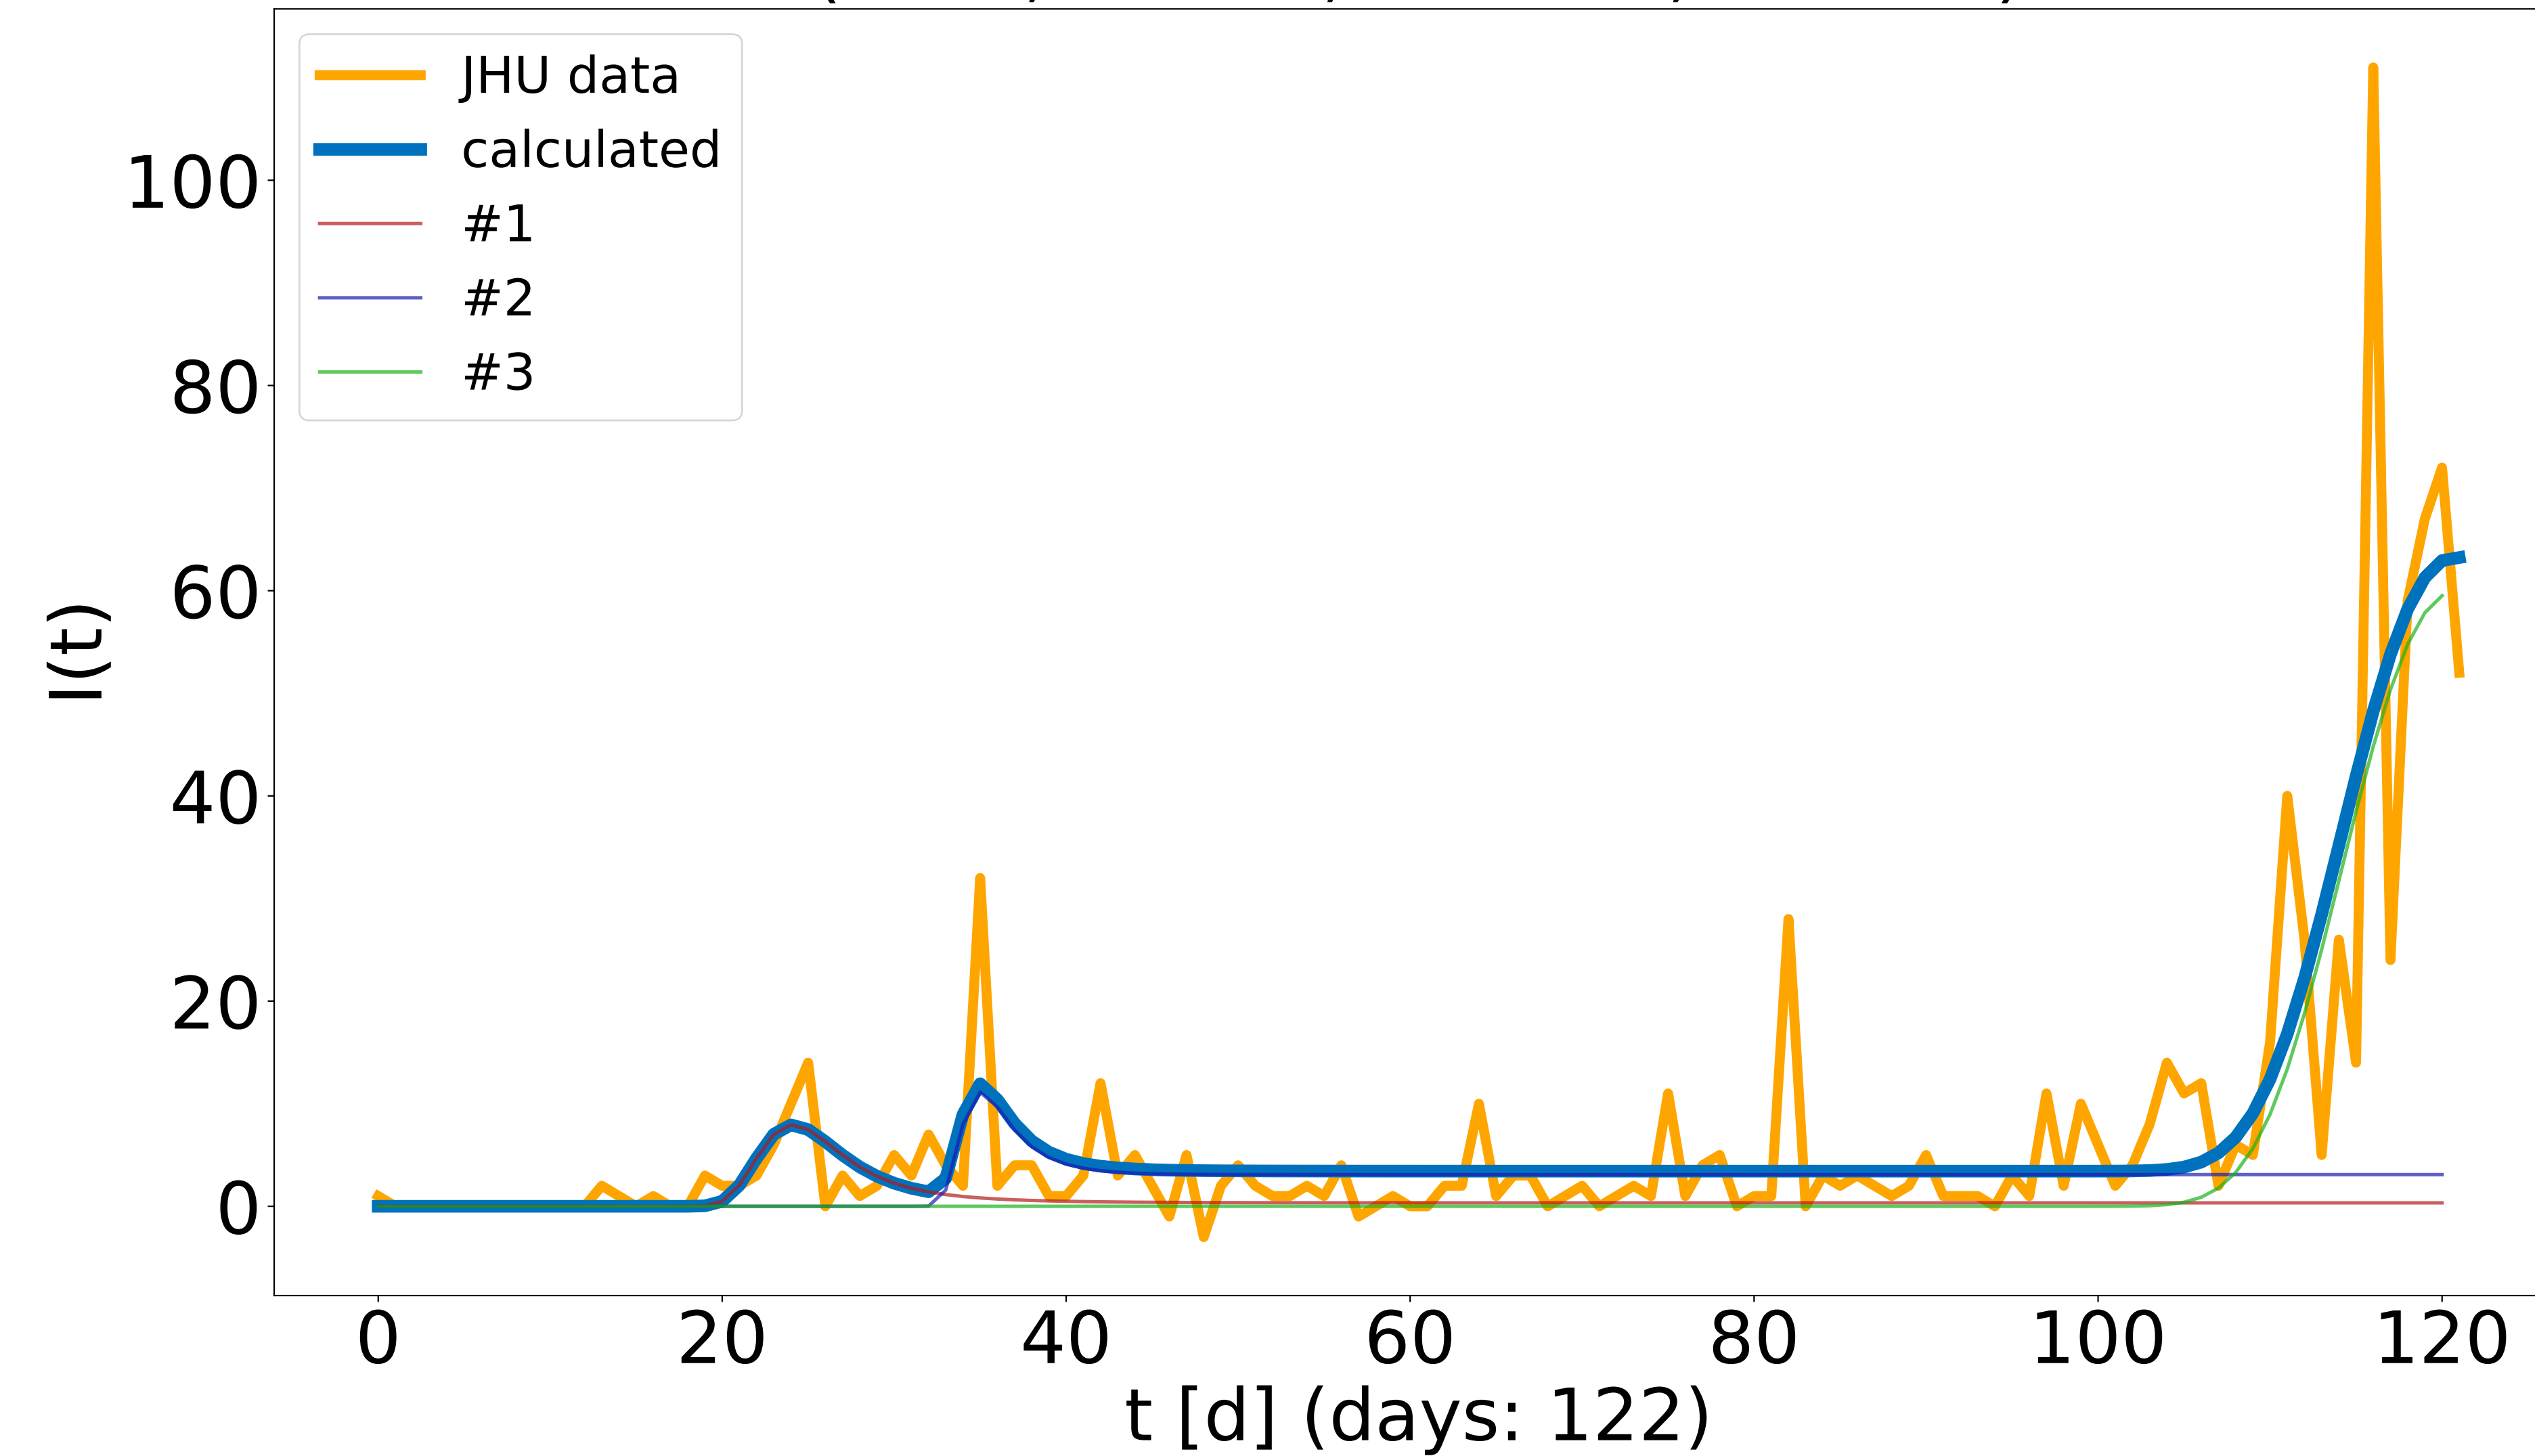

Santa Rosa, Florida, US, Santa Rosa ( $R^2 = 0.981$ )

(i: 0.6, a: 0.411, b: 0.066, t: 15.1)

(i: 3.6, a: 0.001, b: 0.365, t: 84.4)

(i: 0.1, a: 0.786, b: 0.045, t: 100.7)

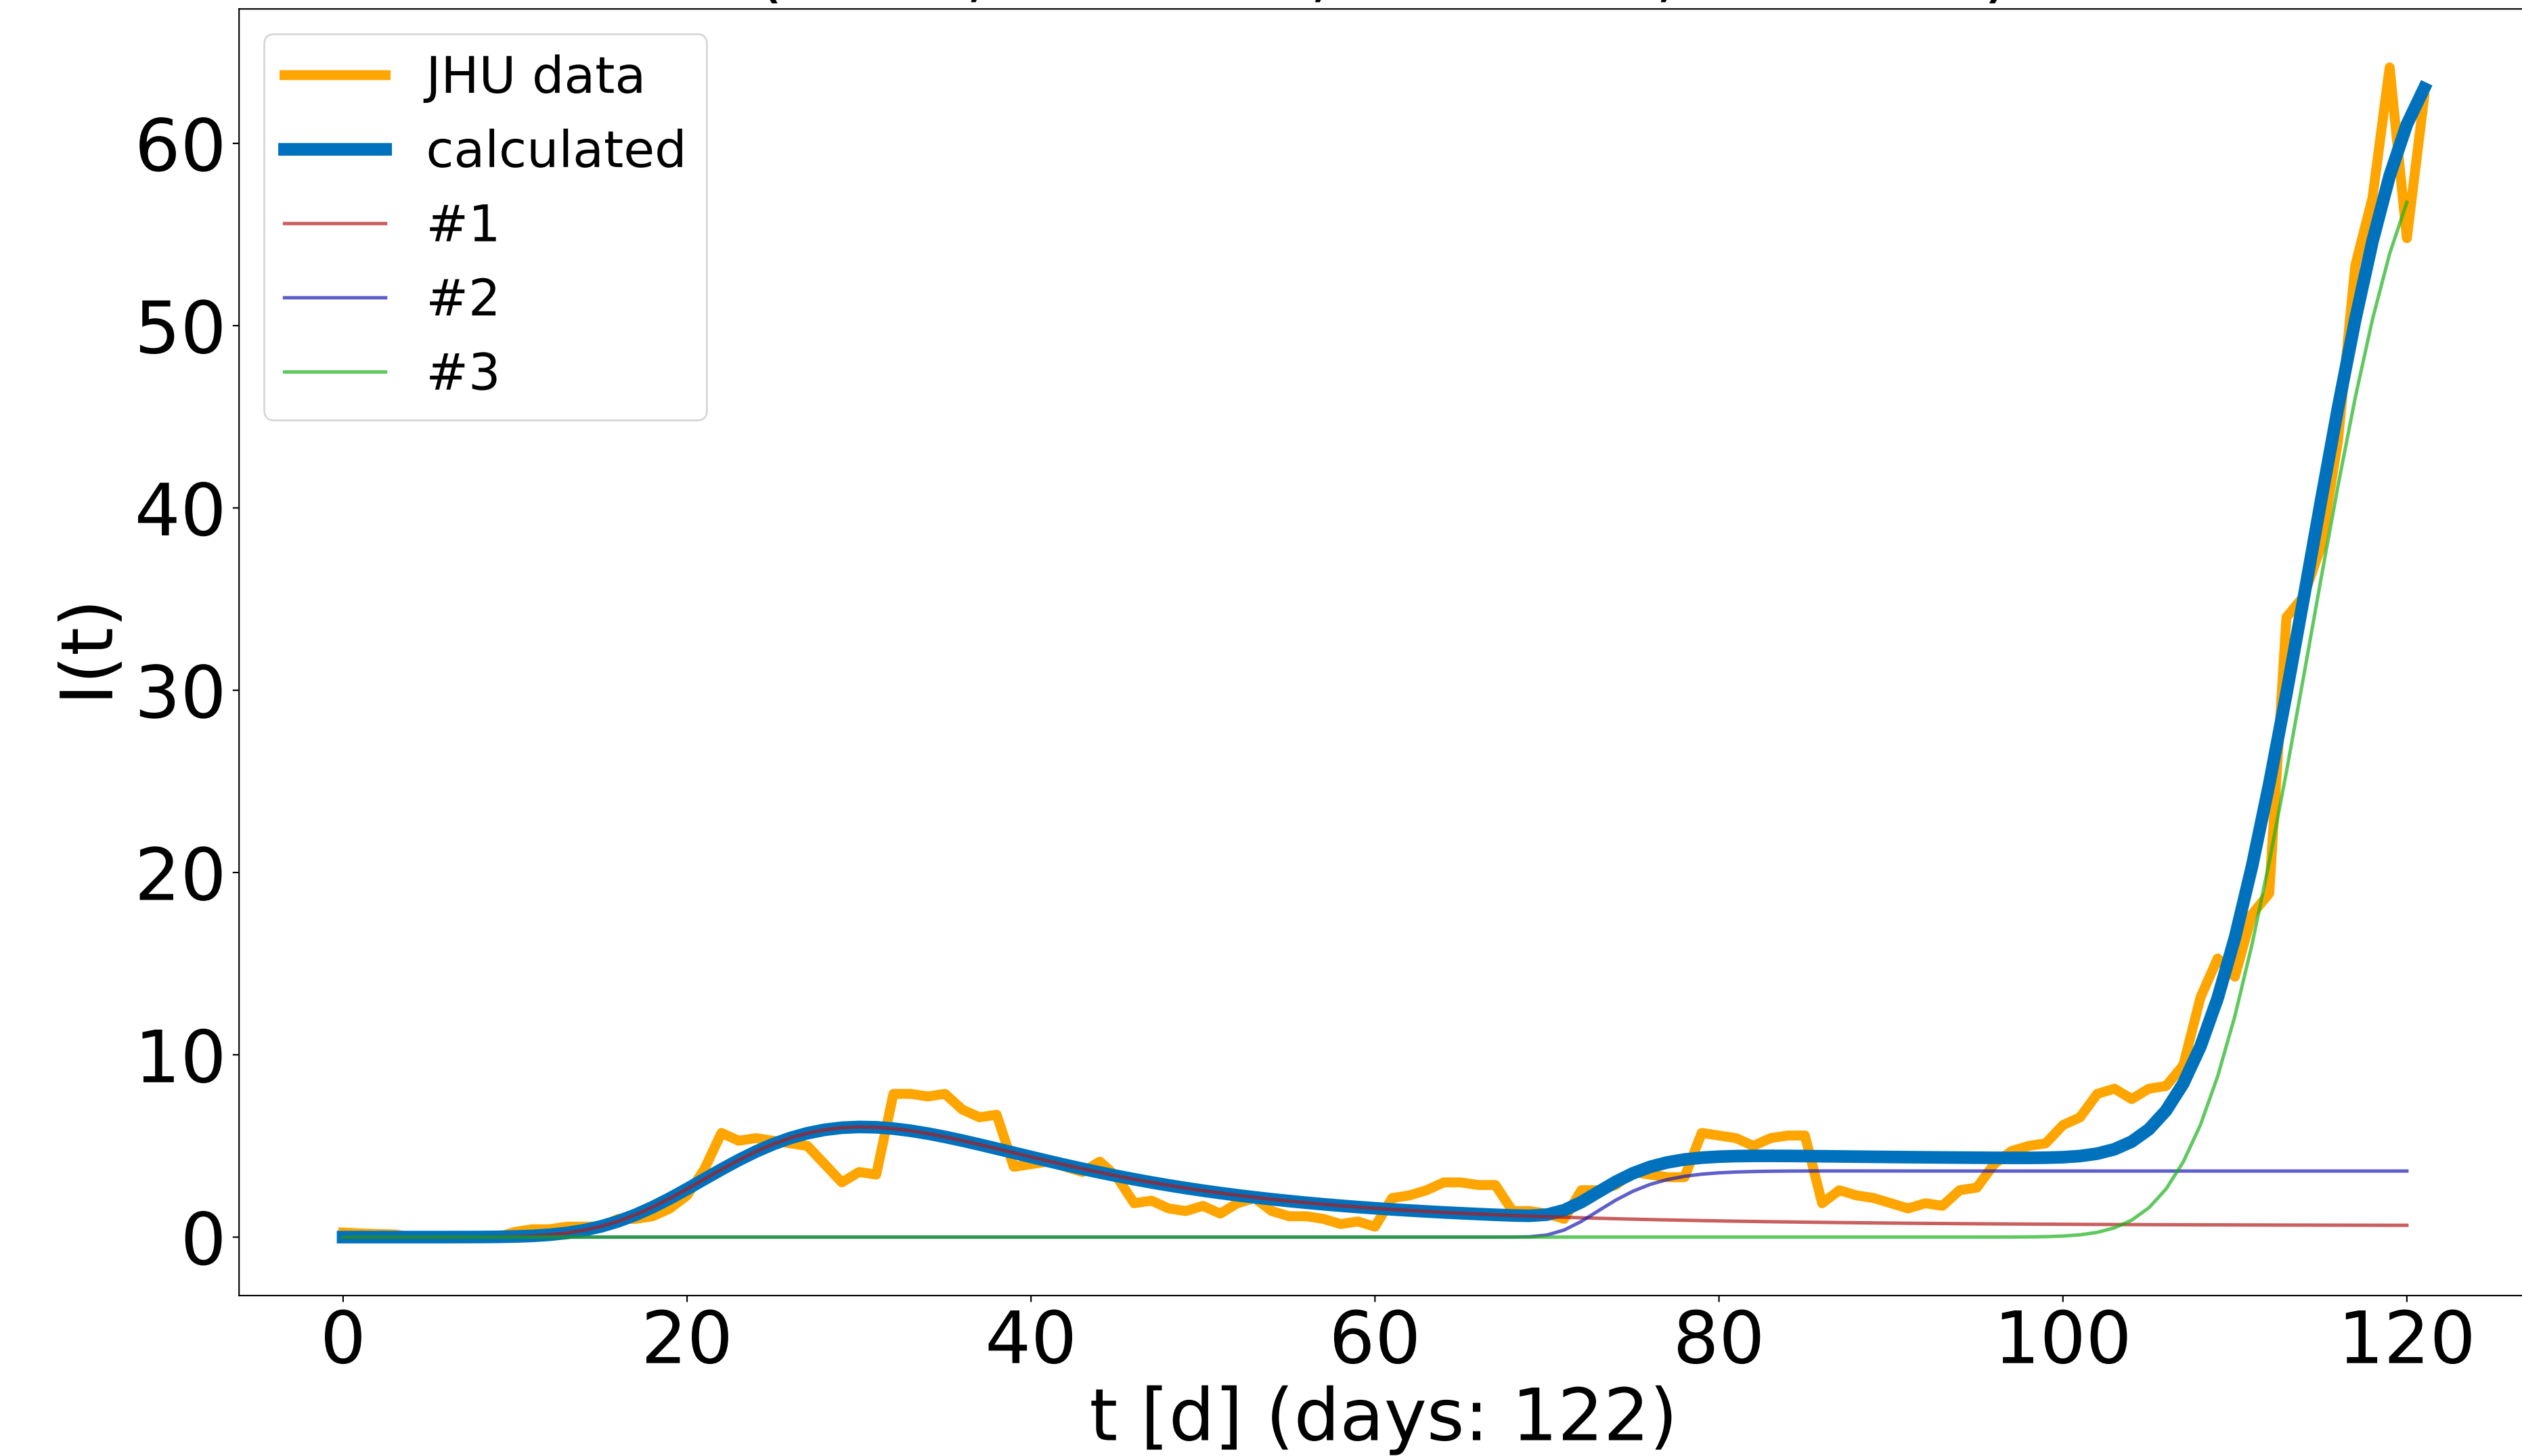

Fulton, Georgia, US, Fulton ( $R^2 = 0.653$ )  
(i: 14.5, a: 0.194, b: 0.053, t: 17.8)  
(i: 26.5, a: 1.997, b: 1.4, t: 23.5)  
(i: 22.4, a: 0.254, b: 0.028, t: 107.1)

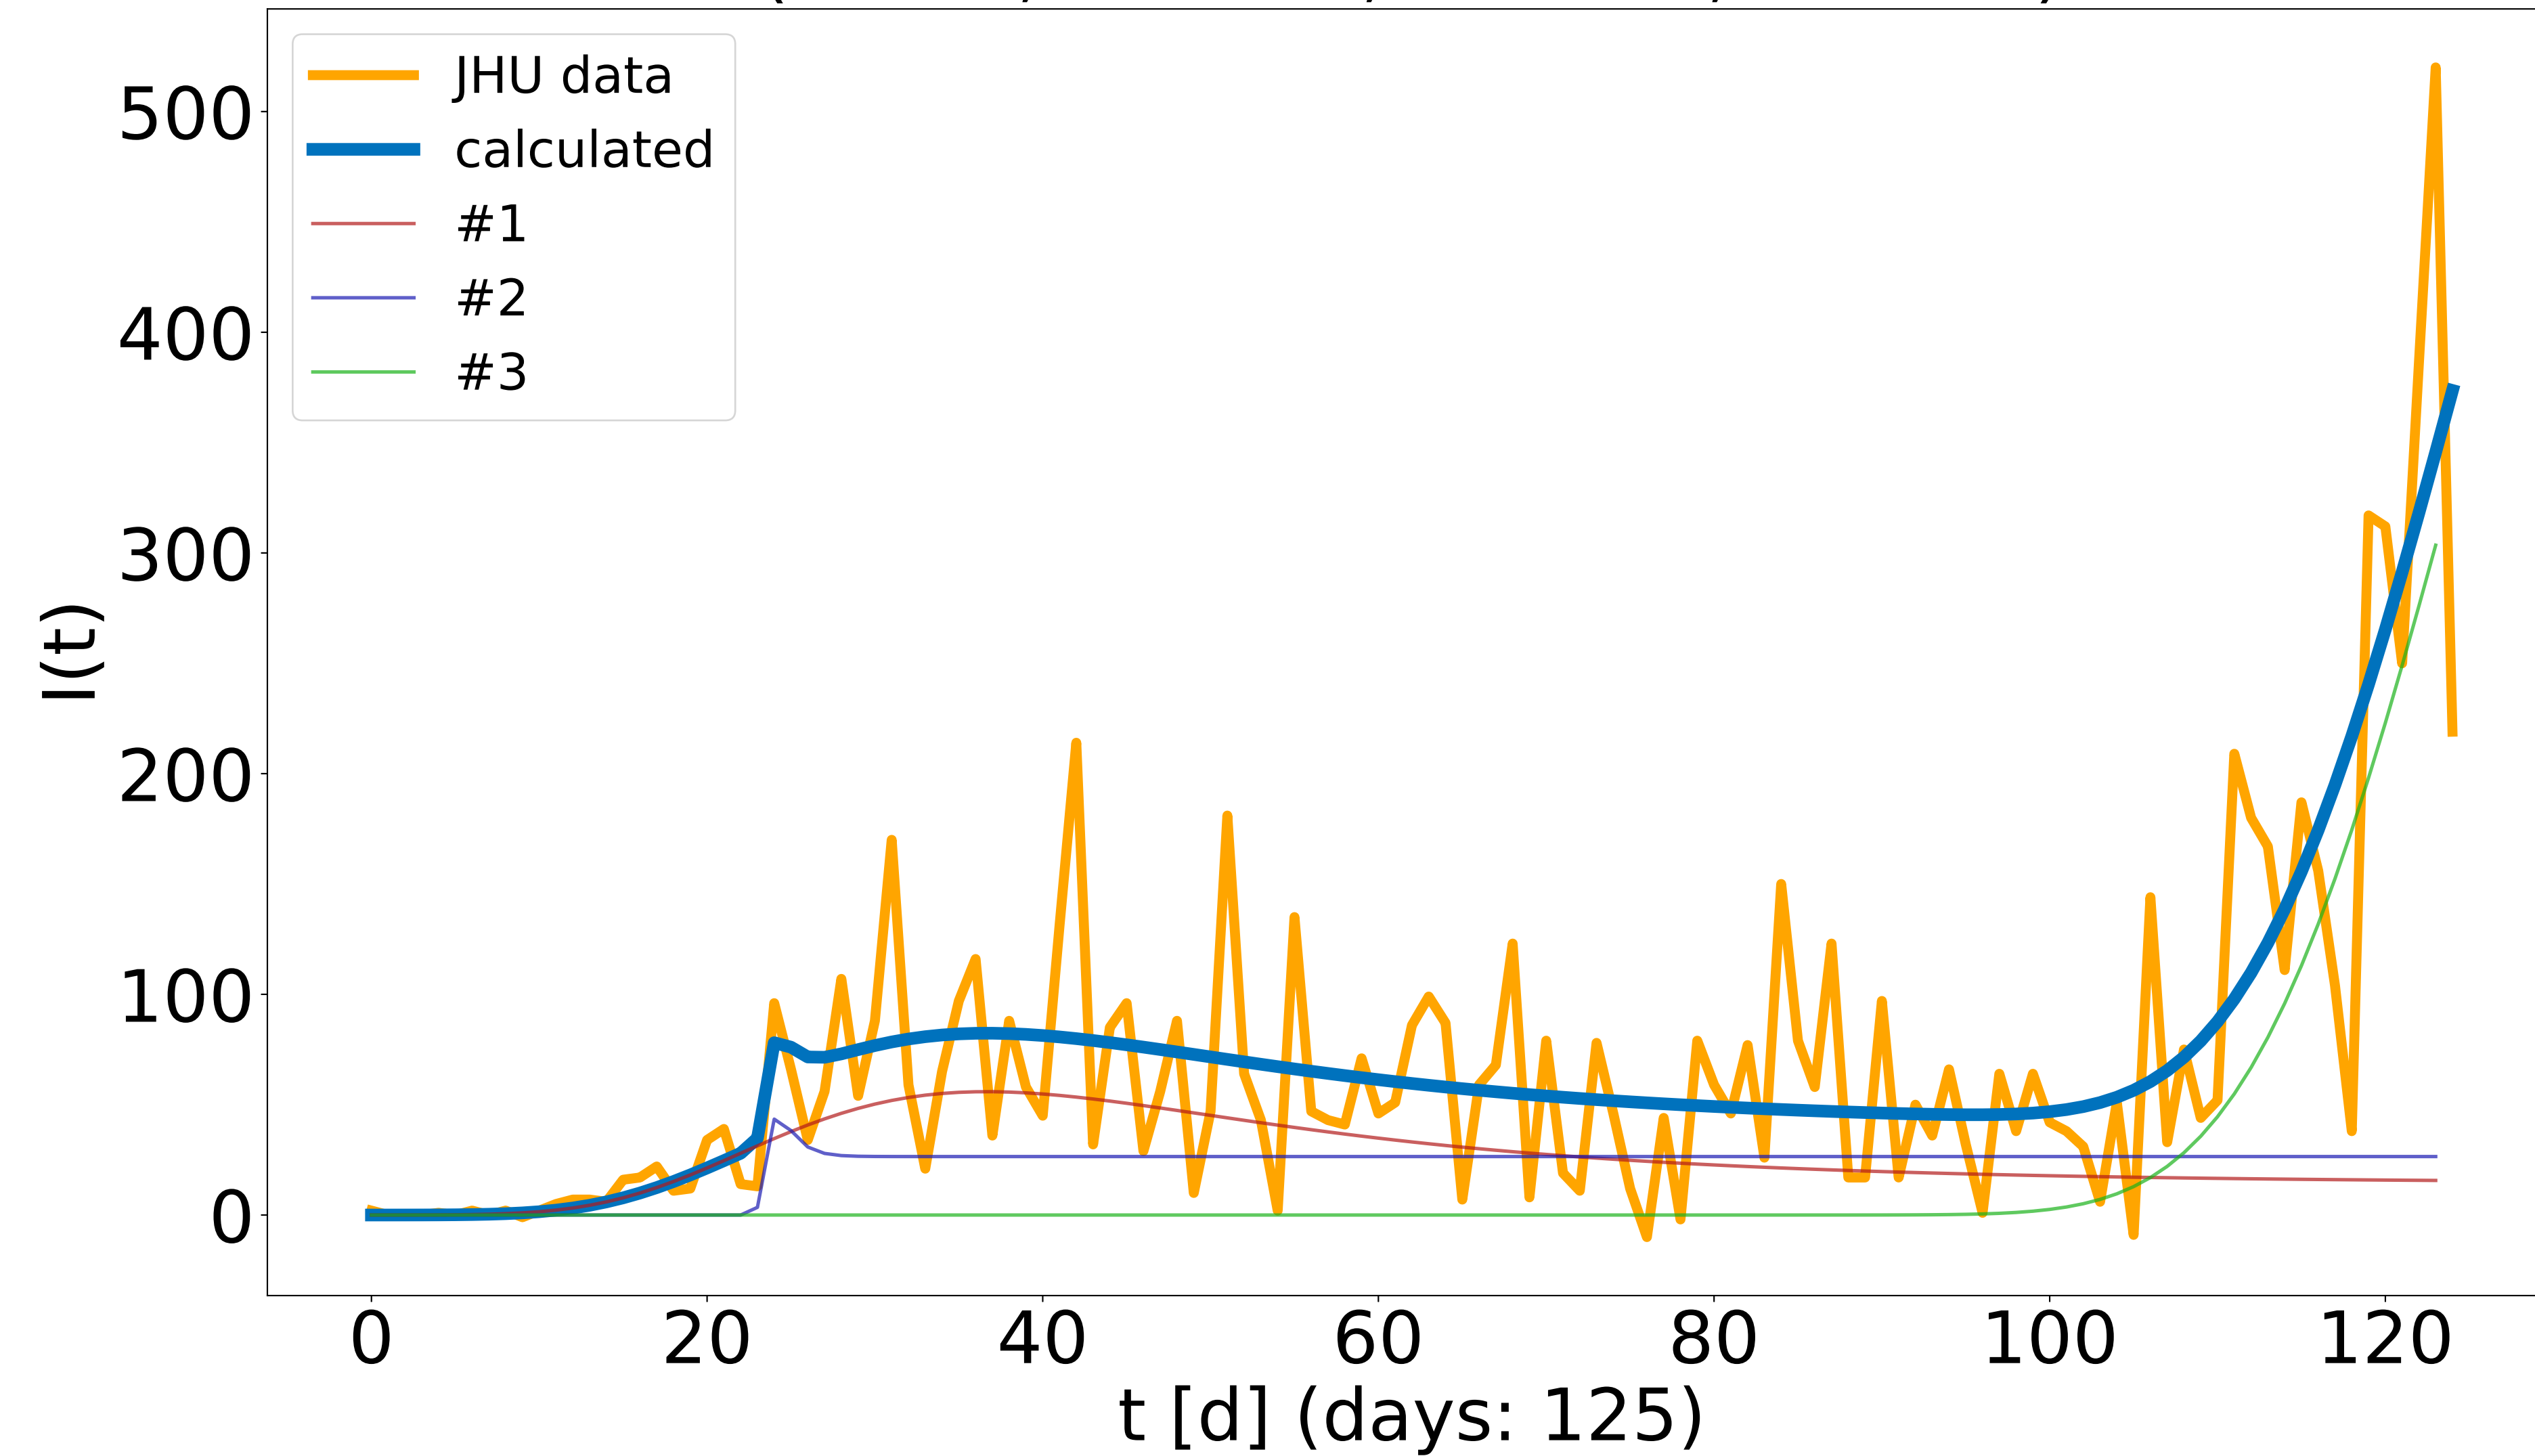

Fulton, Georgia, US, Fulton ( $R^2 = 0.976$ )  
(i: 23.5, a: 0.179, b: 0.051, t: 18.4)  
(i: 0.3, a: 1.871, b: 0.141, t: 77.2)  
(i: 836.2, a: 0.037, b: 0.028, t: 140.0)

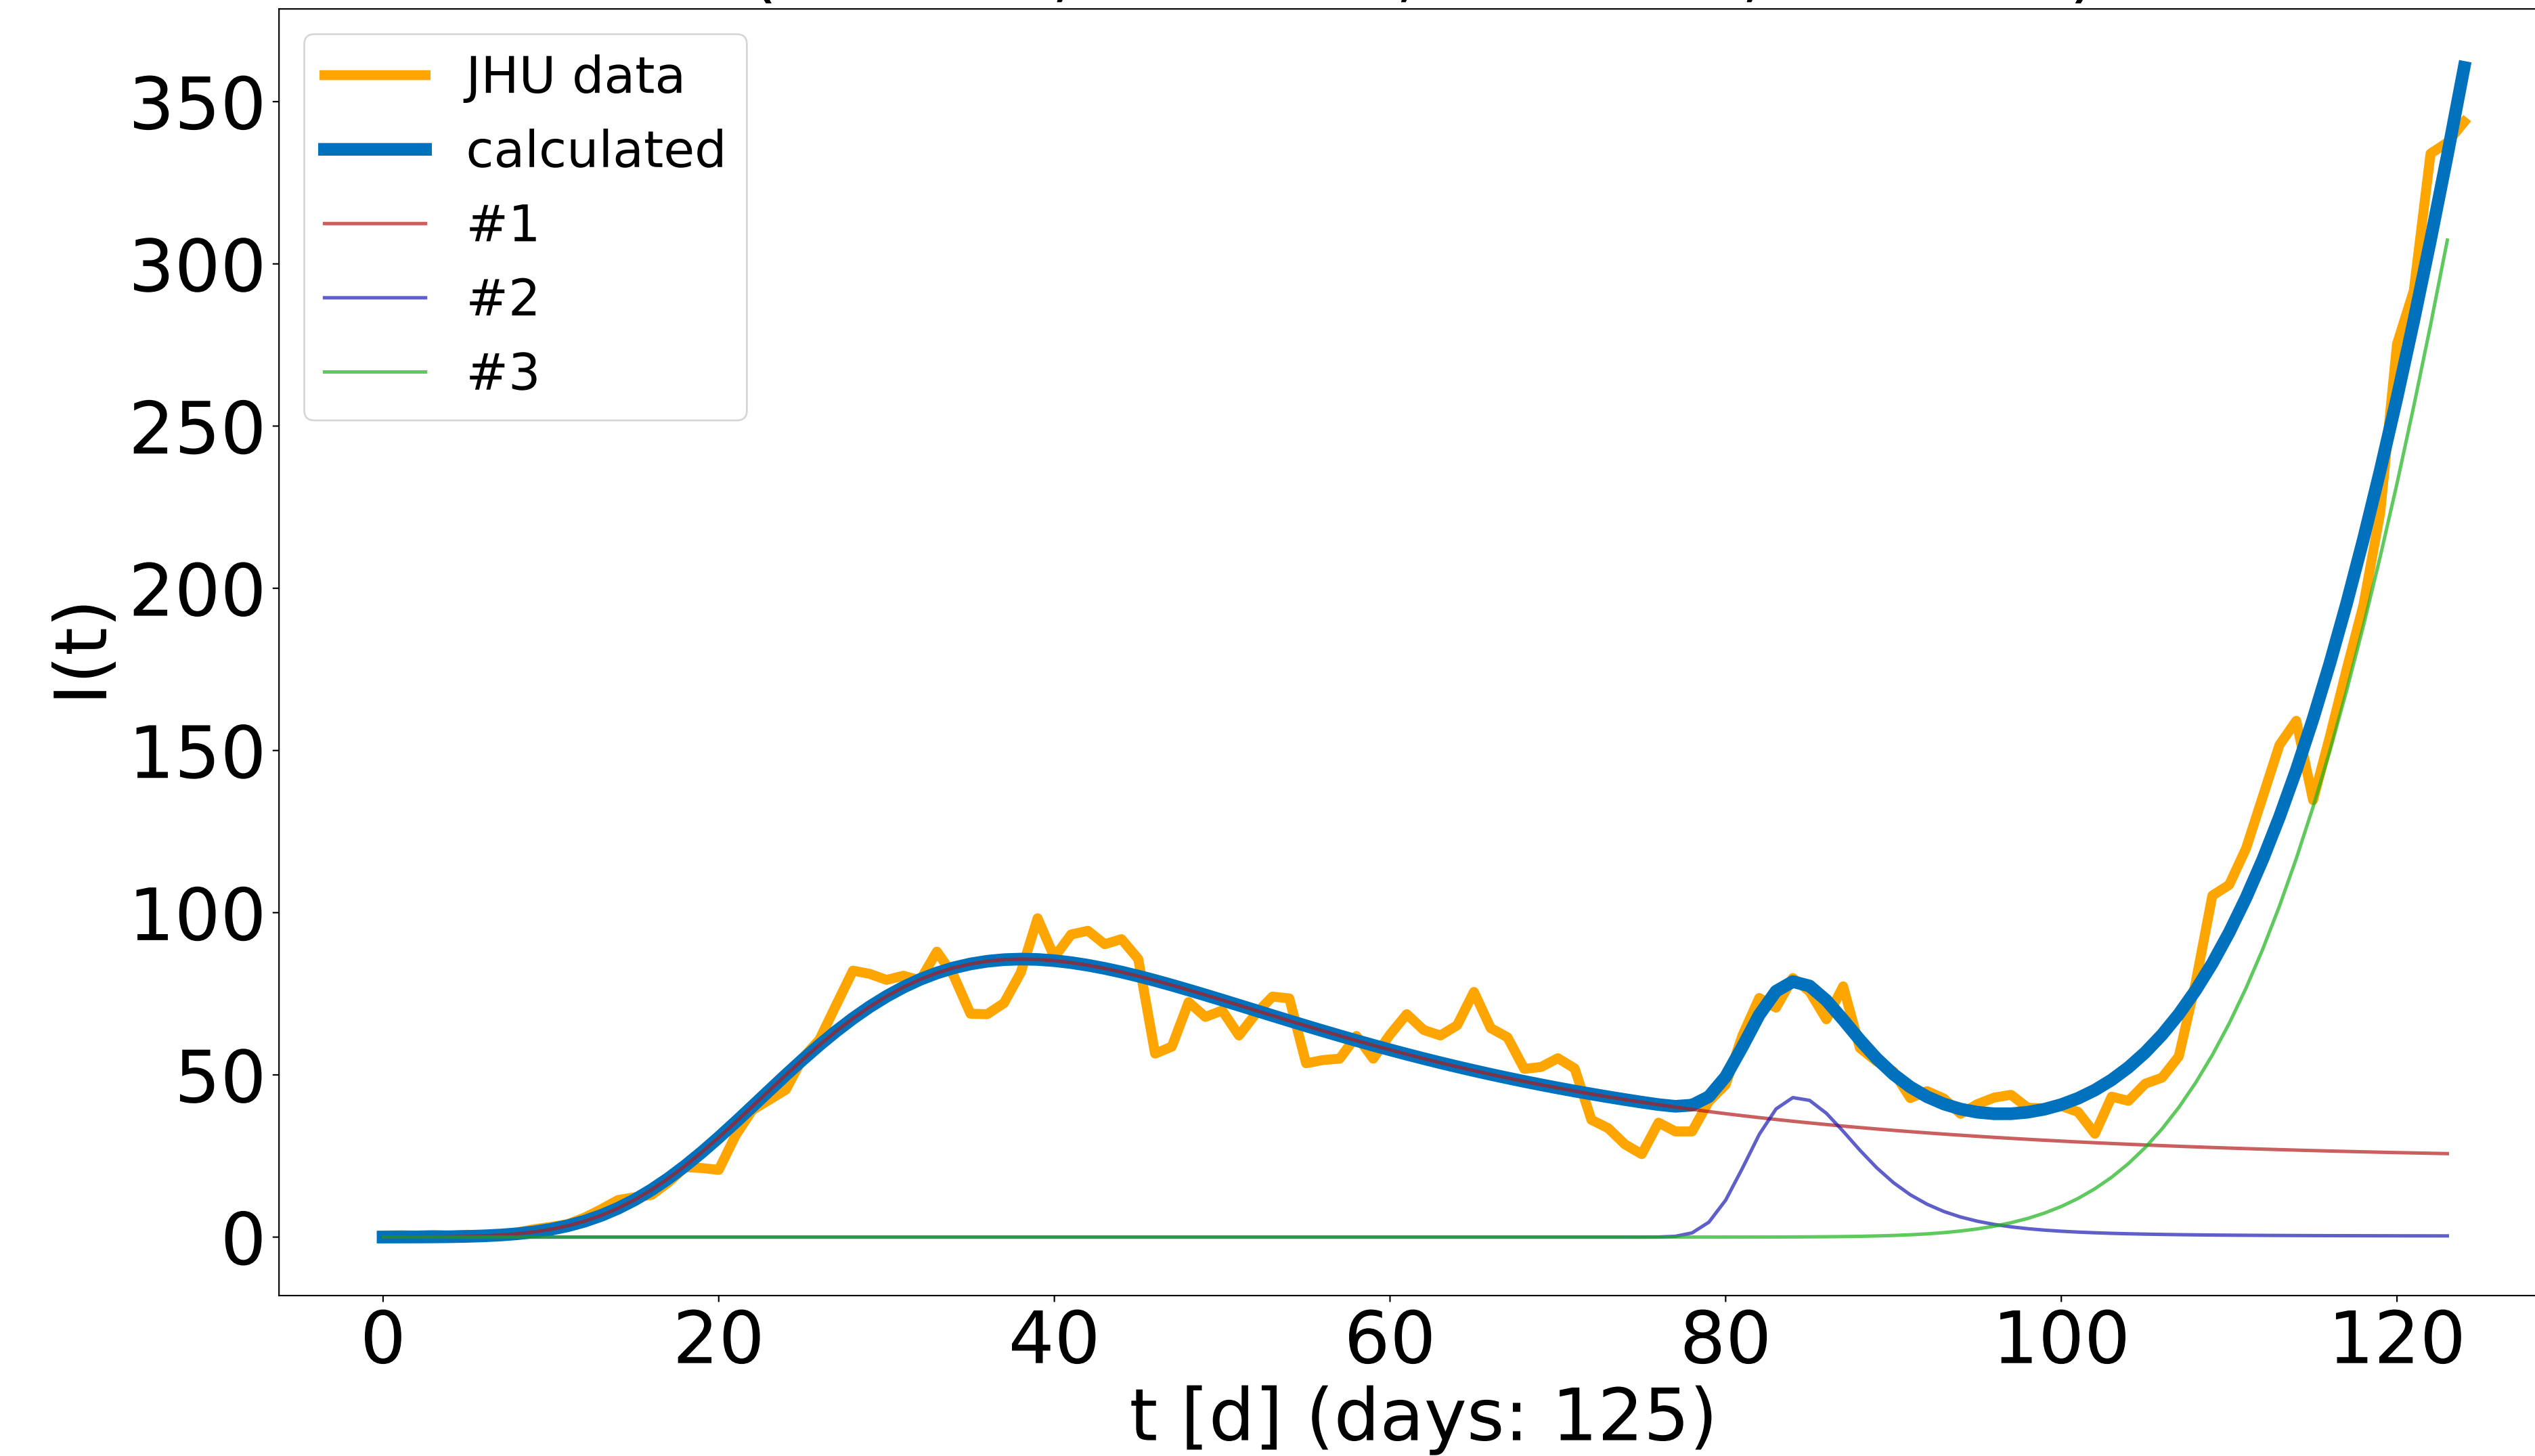

Richmond, Georgia, US, Richmond ( $R^2 = 0.707$ )

(i: 6.5, a: 0.393, b: 0.137, t: 20.8)

(i: 0.1, a: 1.876, b: 1.4, t: 43.4)

(i: 0.1, a: 1.382, b: 0.078, t: 96.5)

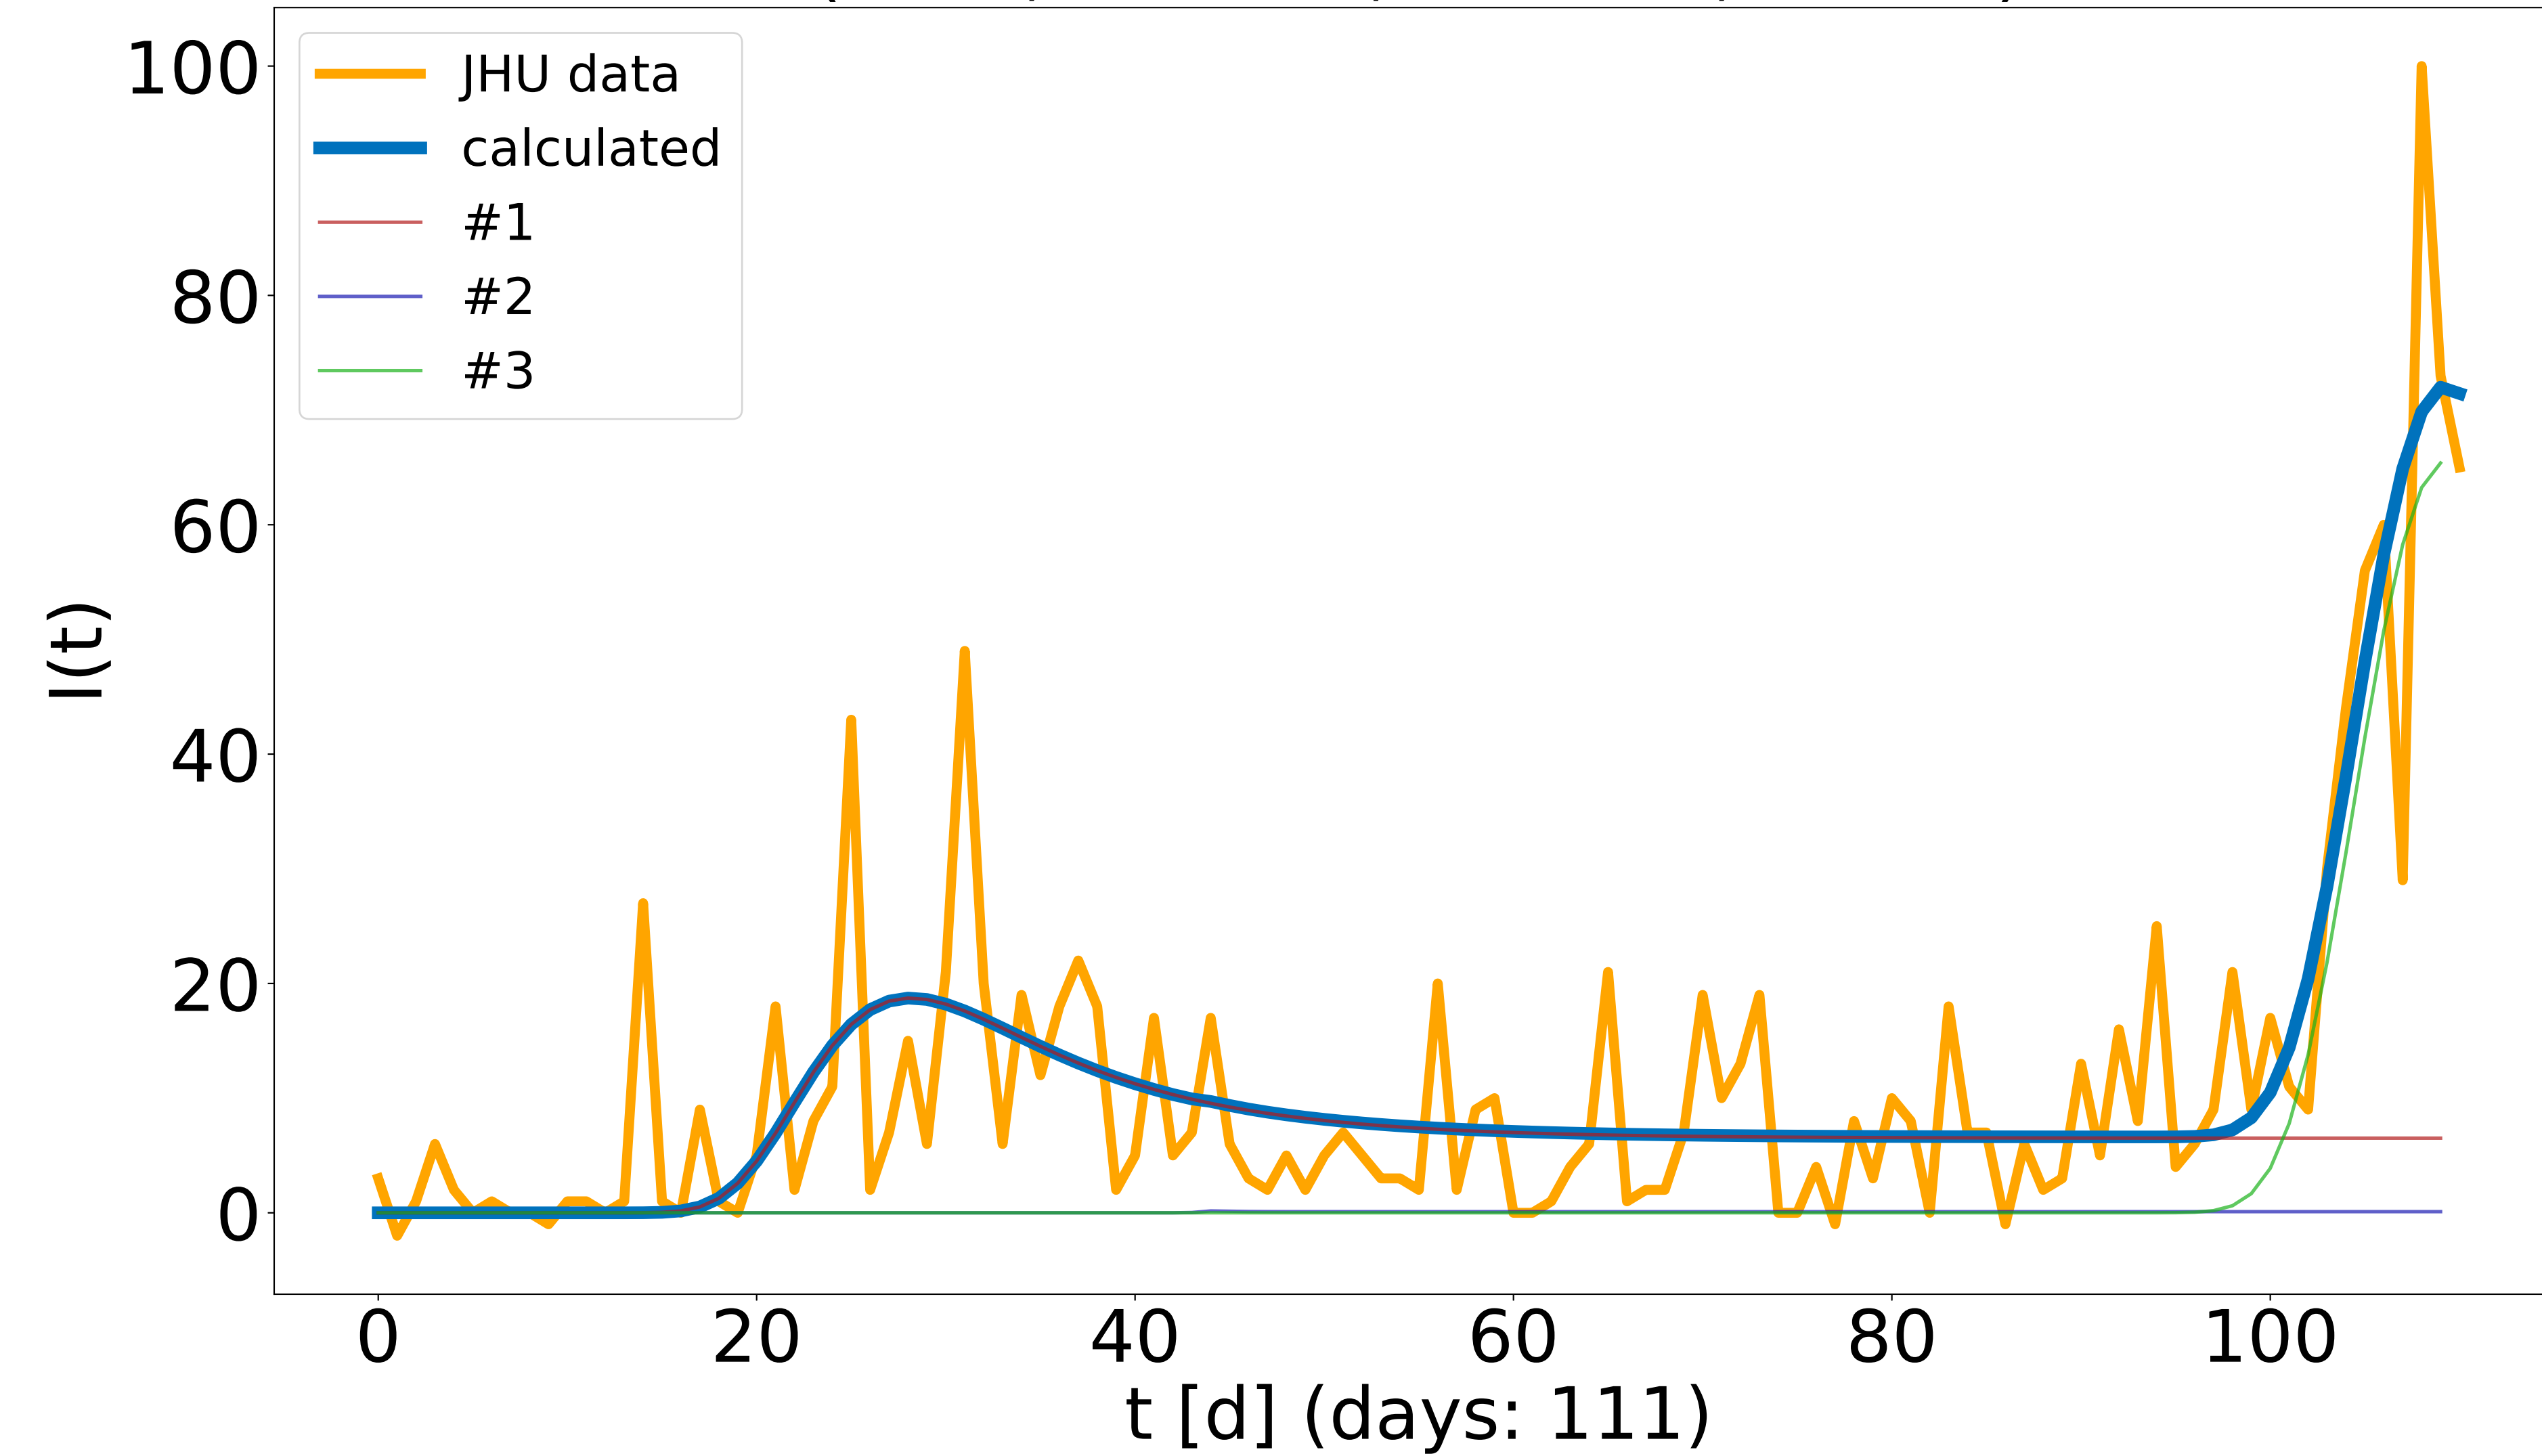

Richmond, Georgia, US, Richmond ( $R^2 = 0.976$ )

(i: 0.1, a: 0.674, b: 0.048, t: 9.0)

(i: 0.1, a: 1.143, b: 0.066, t: 94.8)

(i: 8.3, a: 0.001, b: 0.07, t: 103.6)

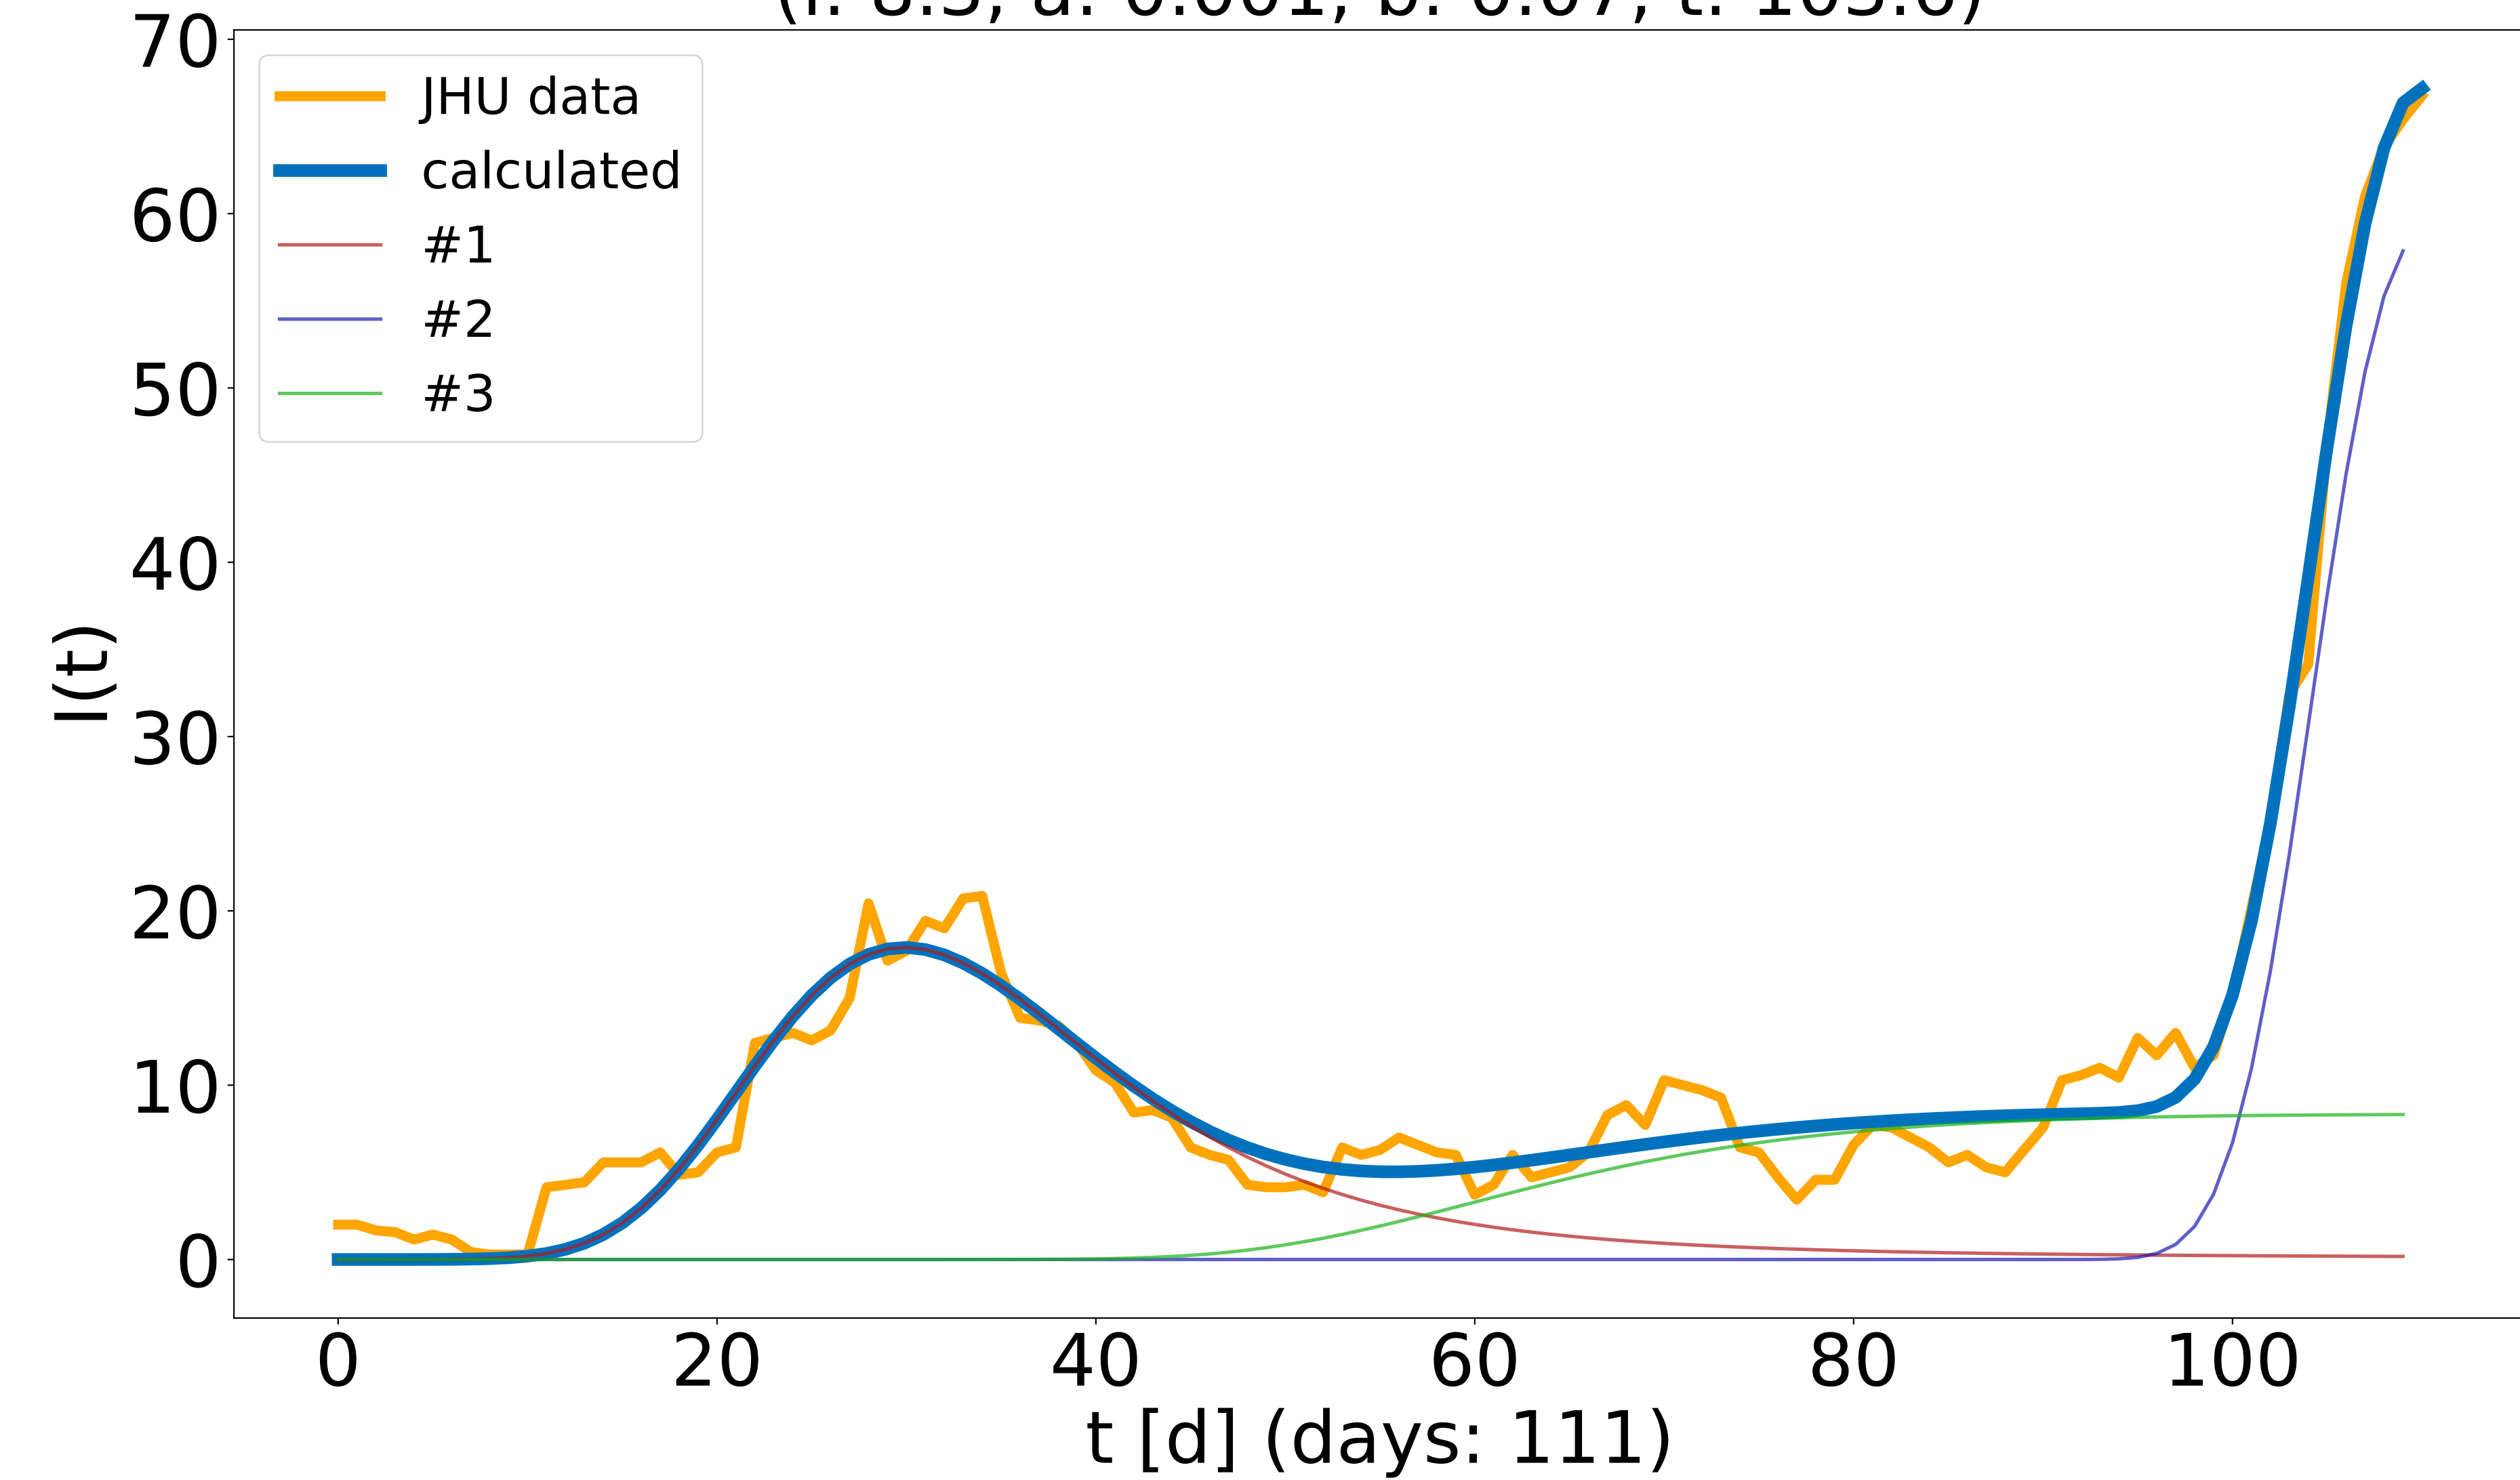



Cook, Illinois, US, Cook ( $R^2 = 0.894$ )  
(i: 0.1, a: 0.882, b: 0.037, t: 44.1)  
(i: 0.1, a: 0.476, b: 0.018, t: 48.0)  
(i: 1.8, a: 0.694, b: 0.05, t: 140.0)

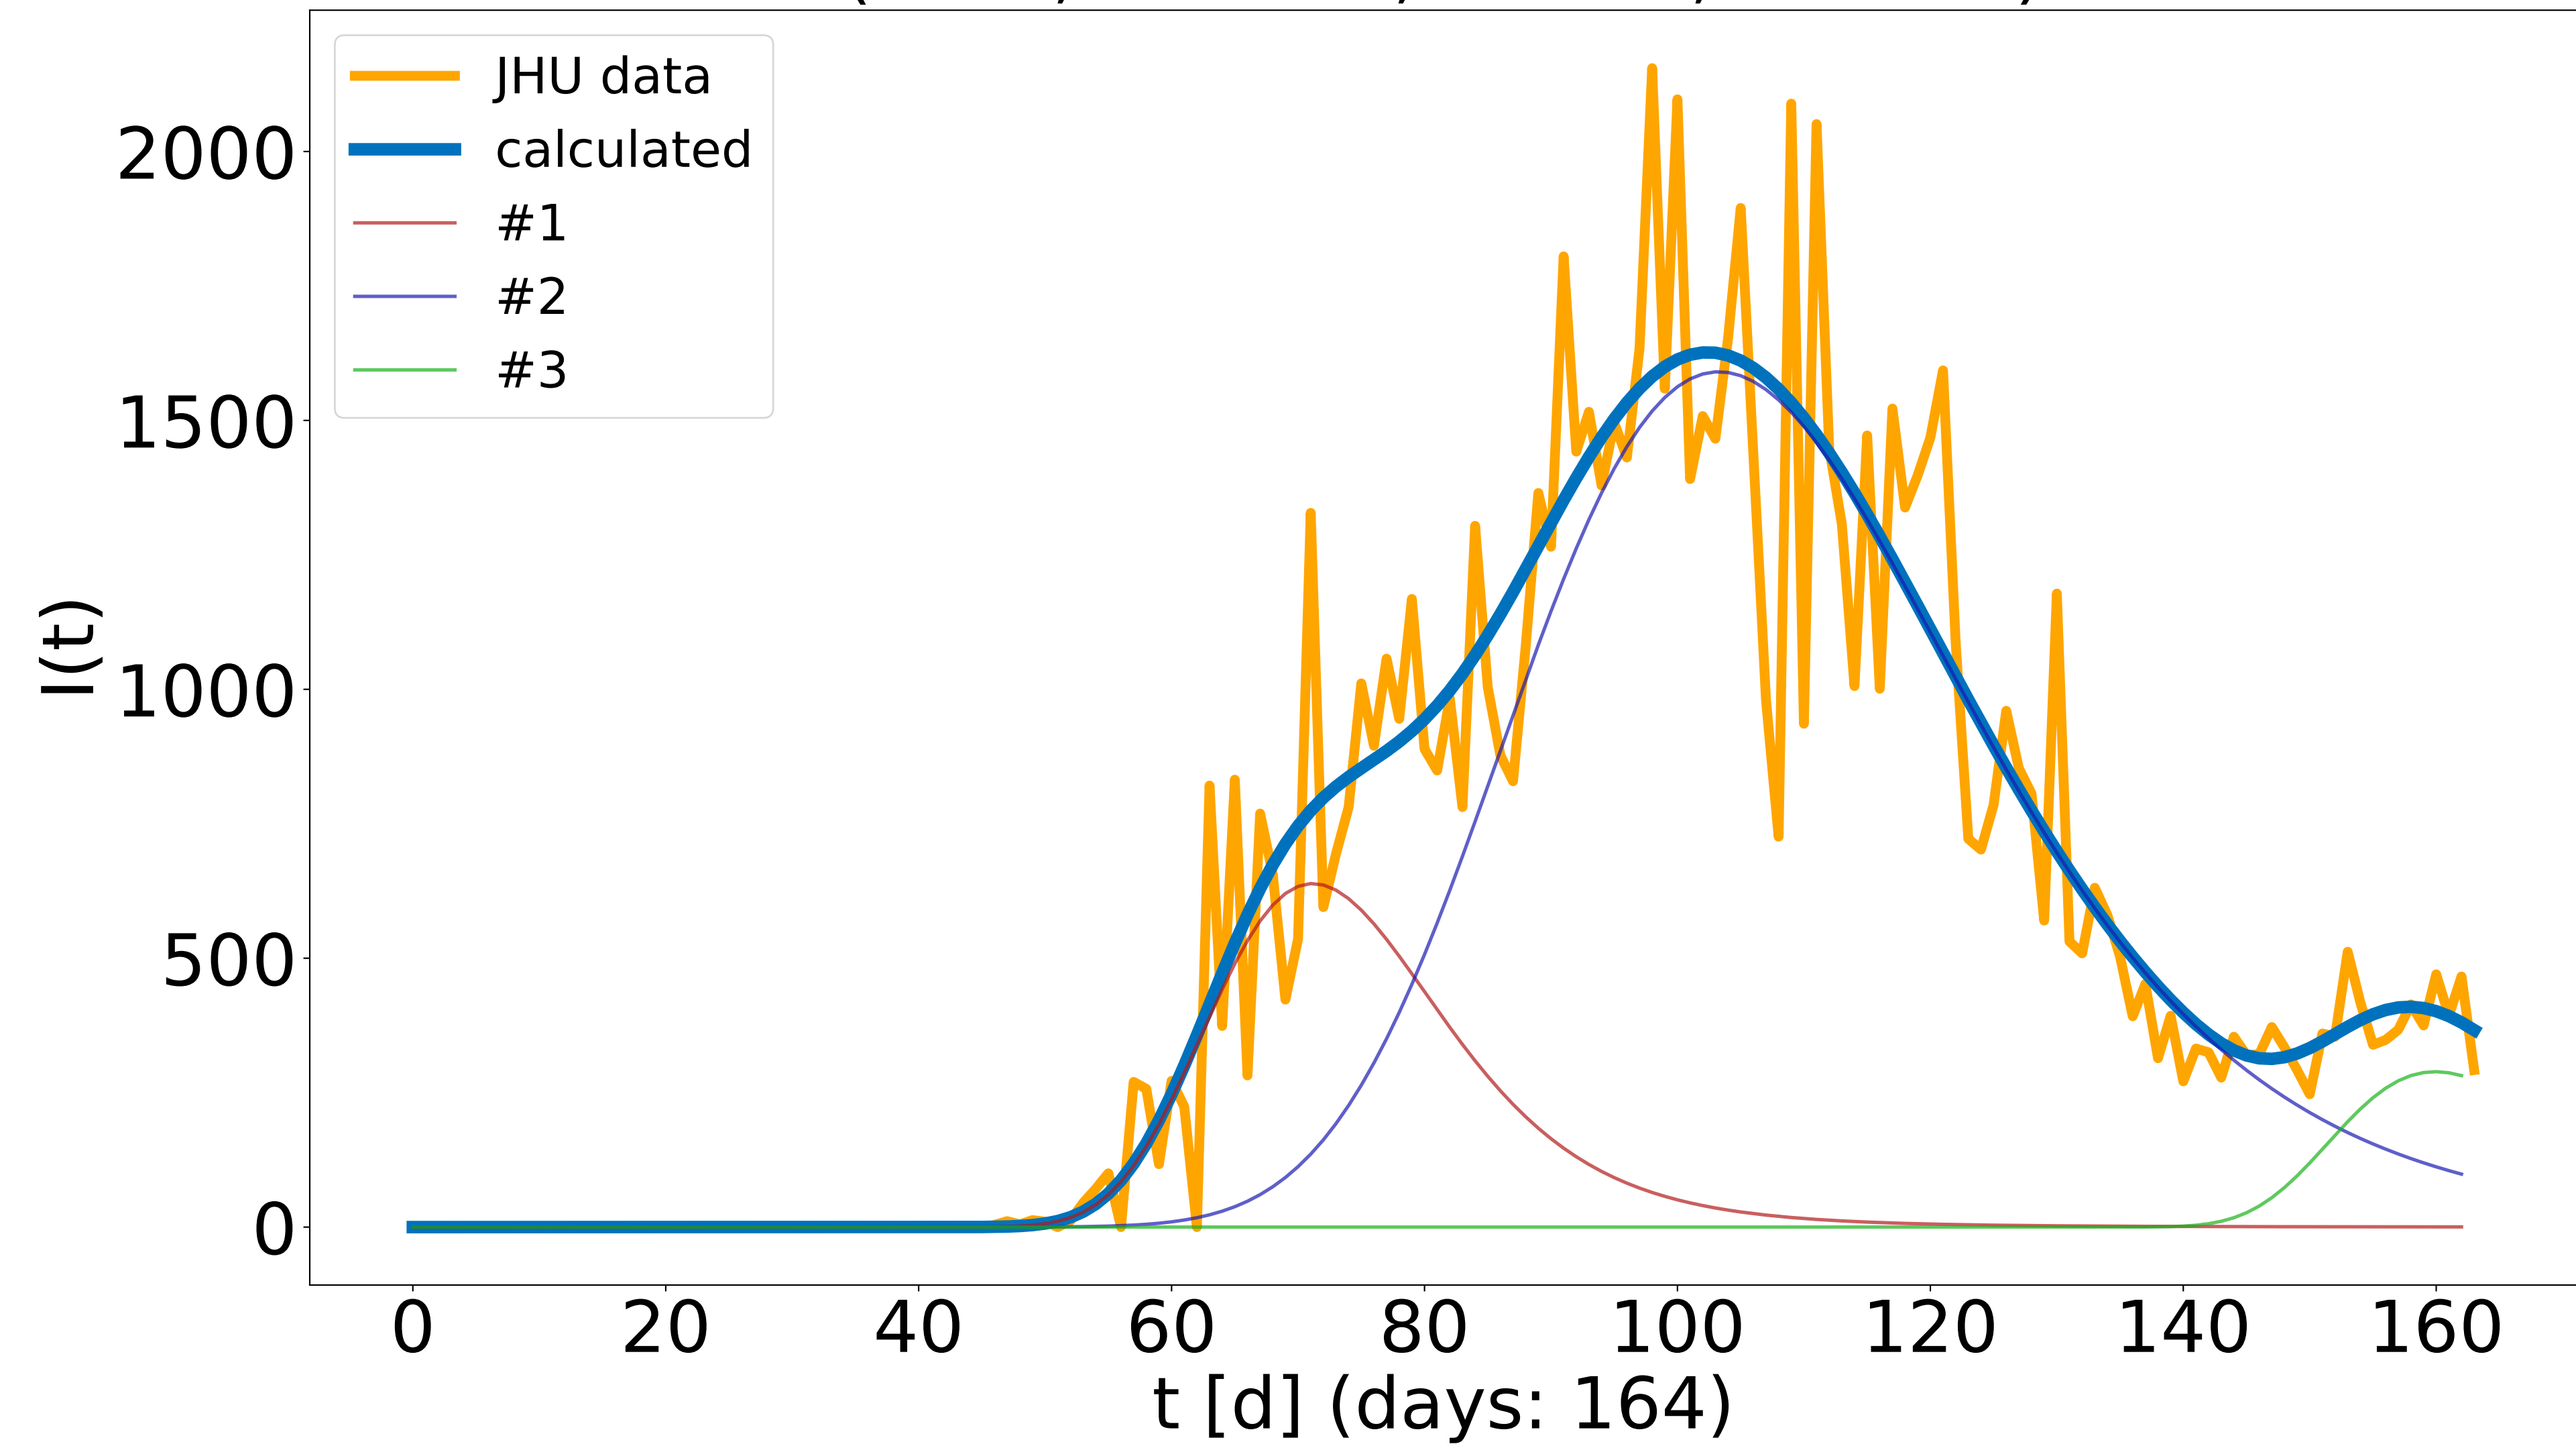

Cook, Illinois, US, Cook ( $R^2 = 0.984$ )  
(i: 0.1, a: 0.543, b: 0.021, t: 55.4)  
(i: 244.4, a: 0.211, b: 0.08, t: 59.4)  
(i: 0.6, a: 2.0, b: 0.131, t: 68.1)

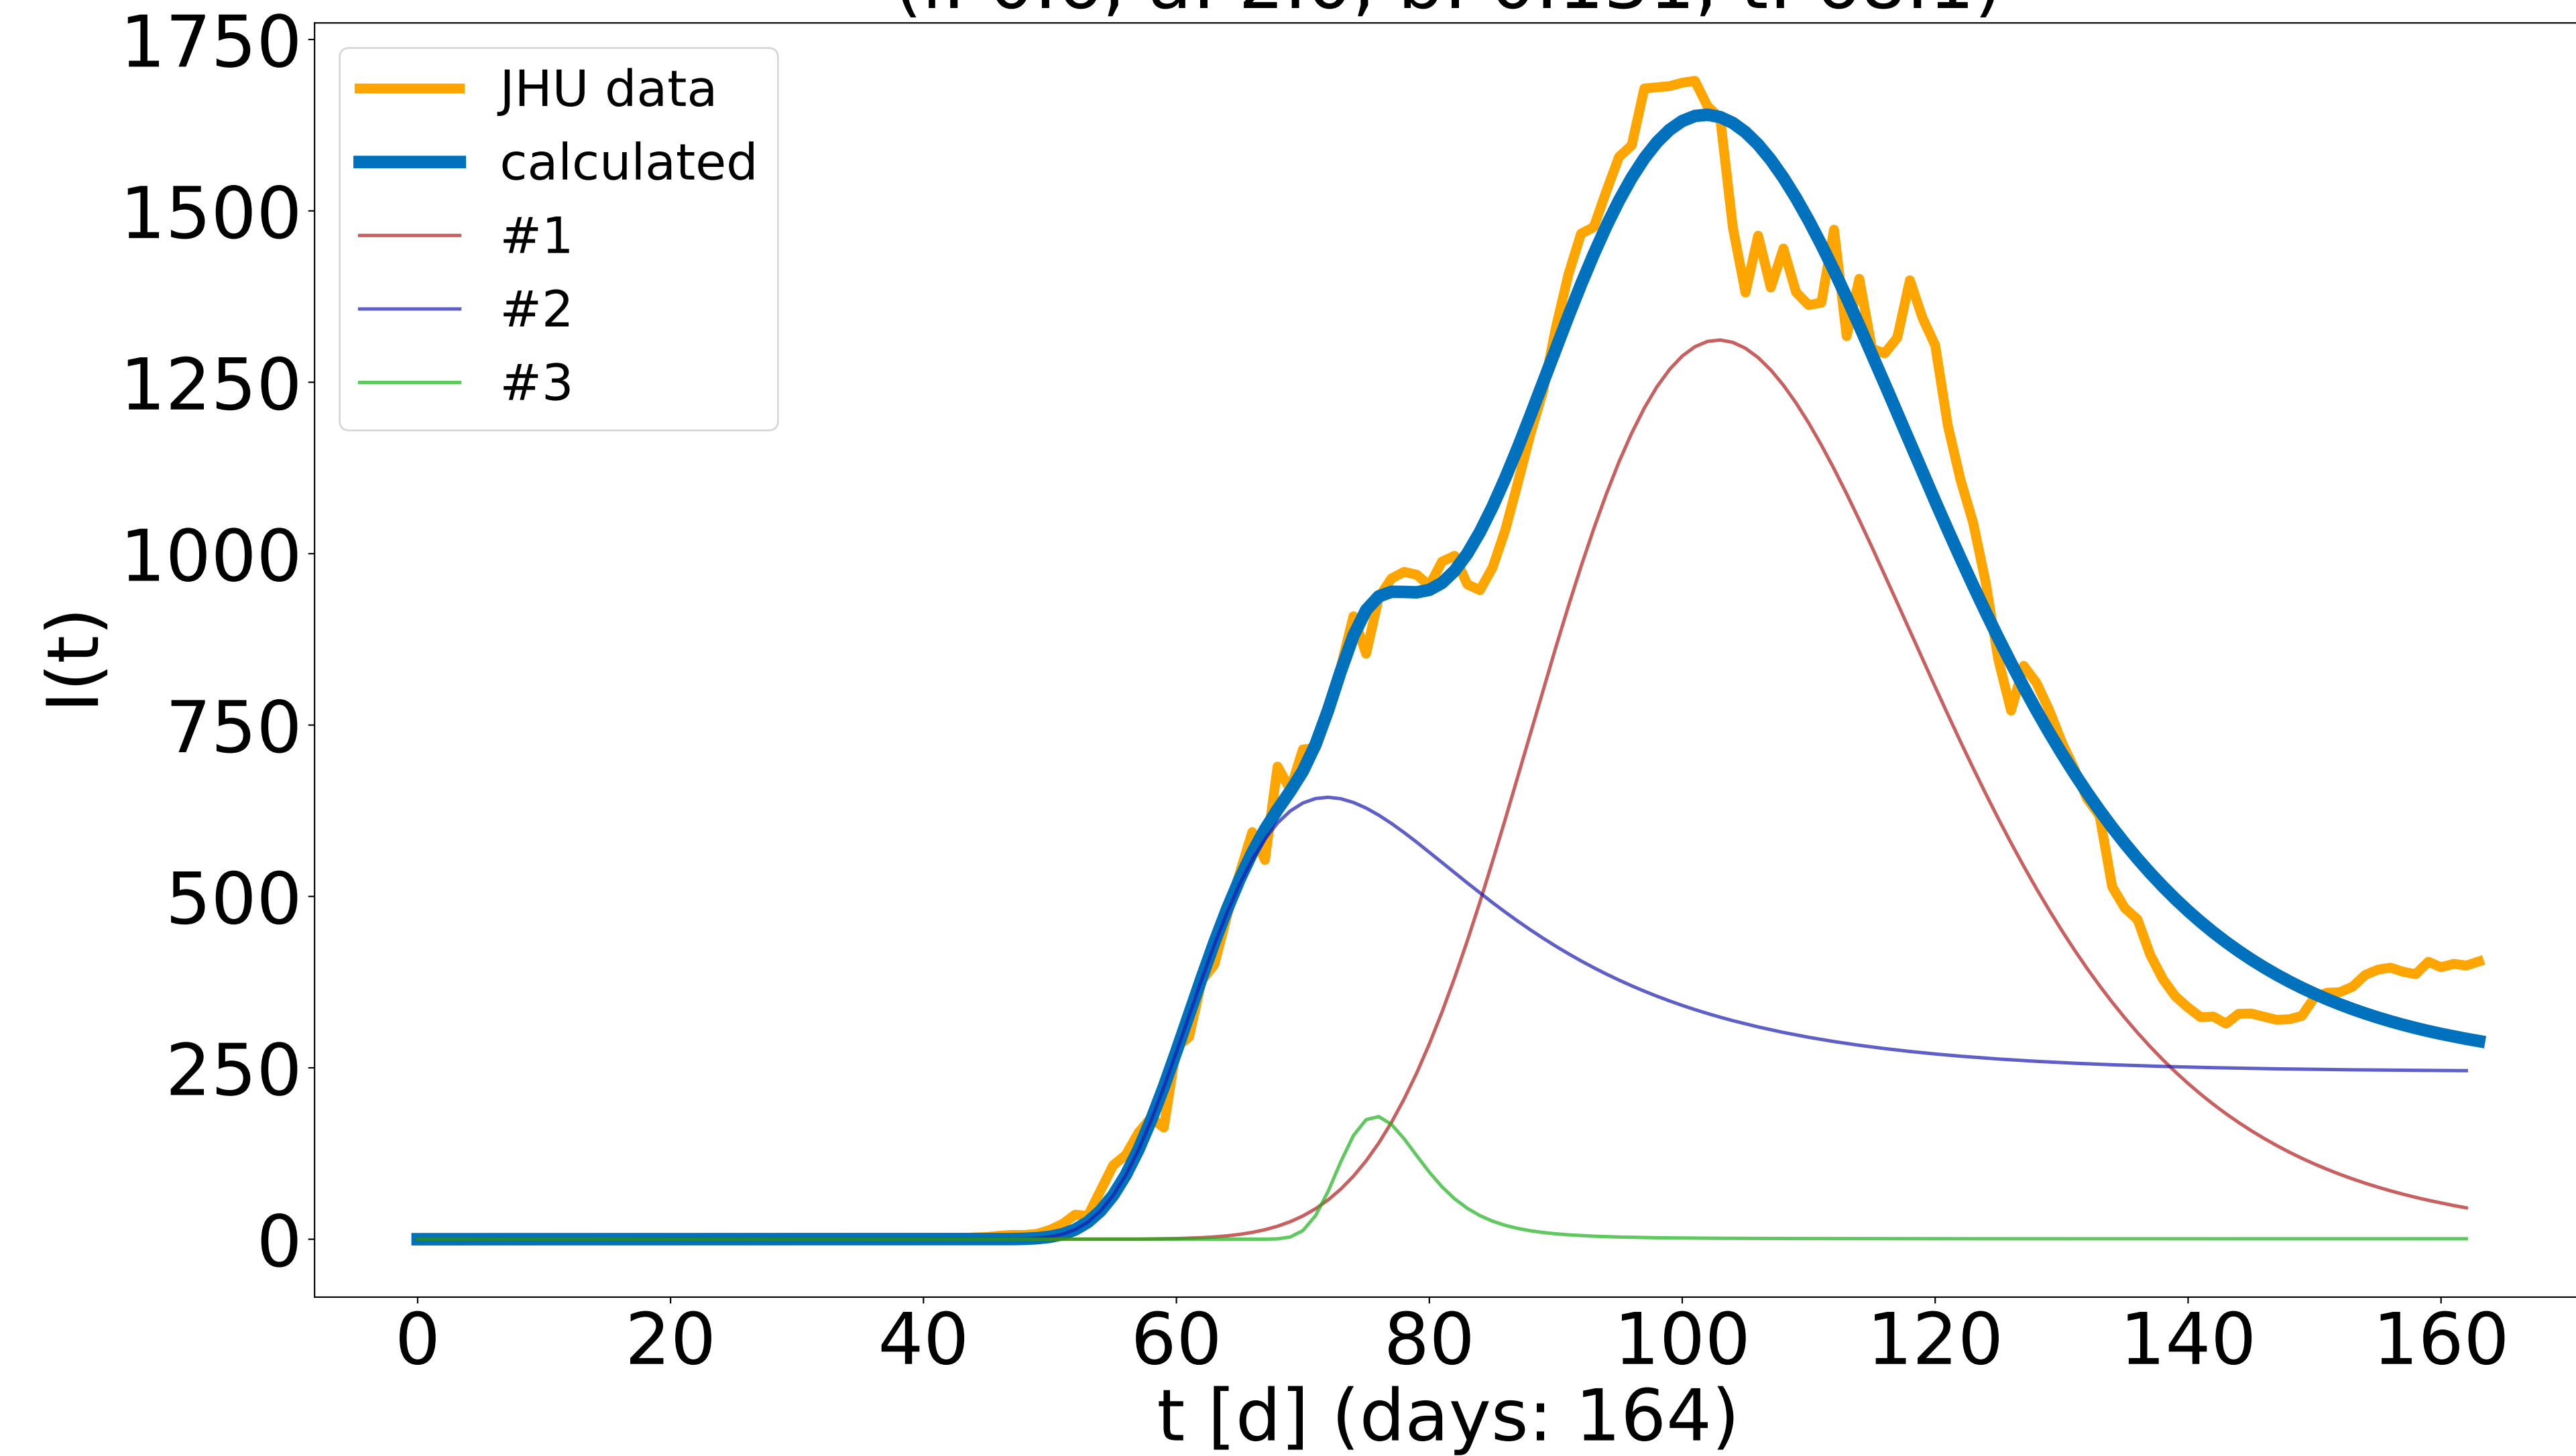

DuPage, Illinois, US, DuPage ( $R^2 = 0.723$ )  
(i: 0.9, a: 0.475, b: 0.041, t: 1.0)  
(i: 0.1, a: 0.499, b: 0.025, t: 16.9)  
(i: 49.4, a: 0.046, b: 0.053, t: 113.9)

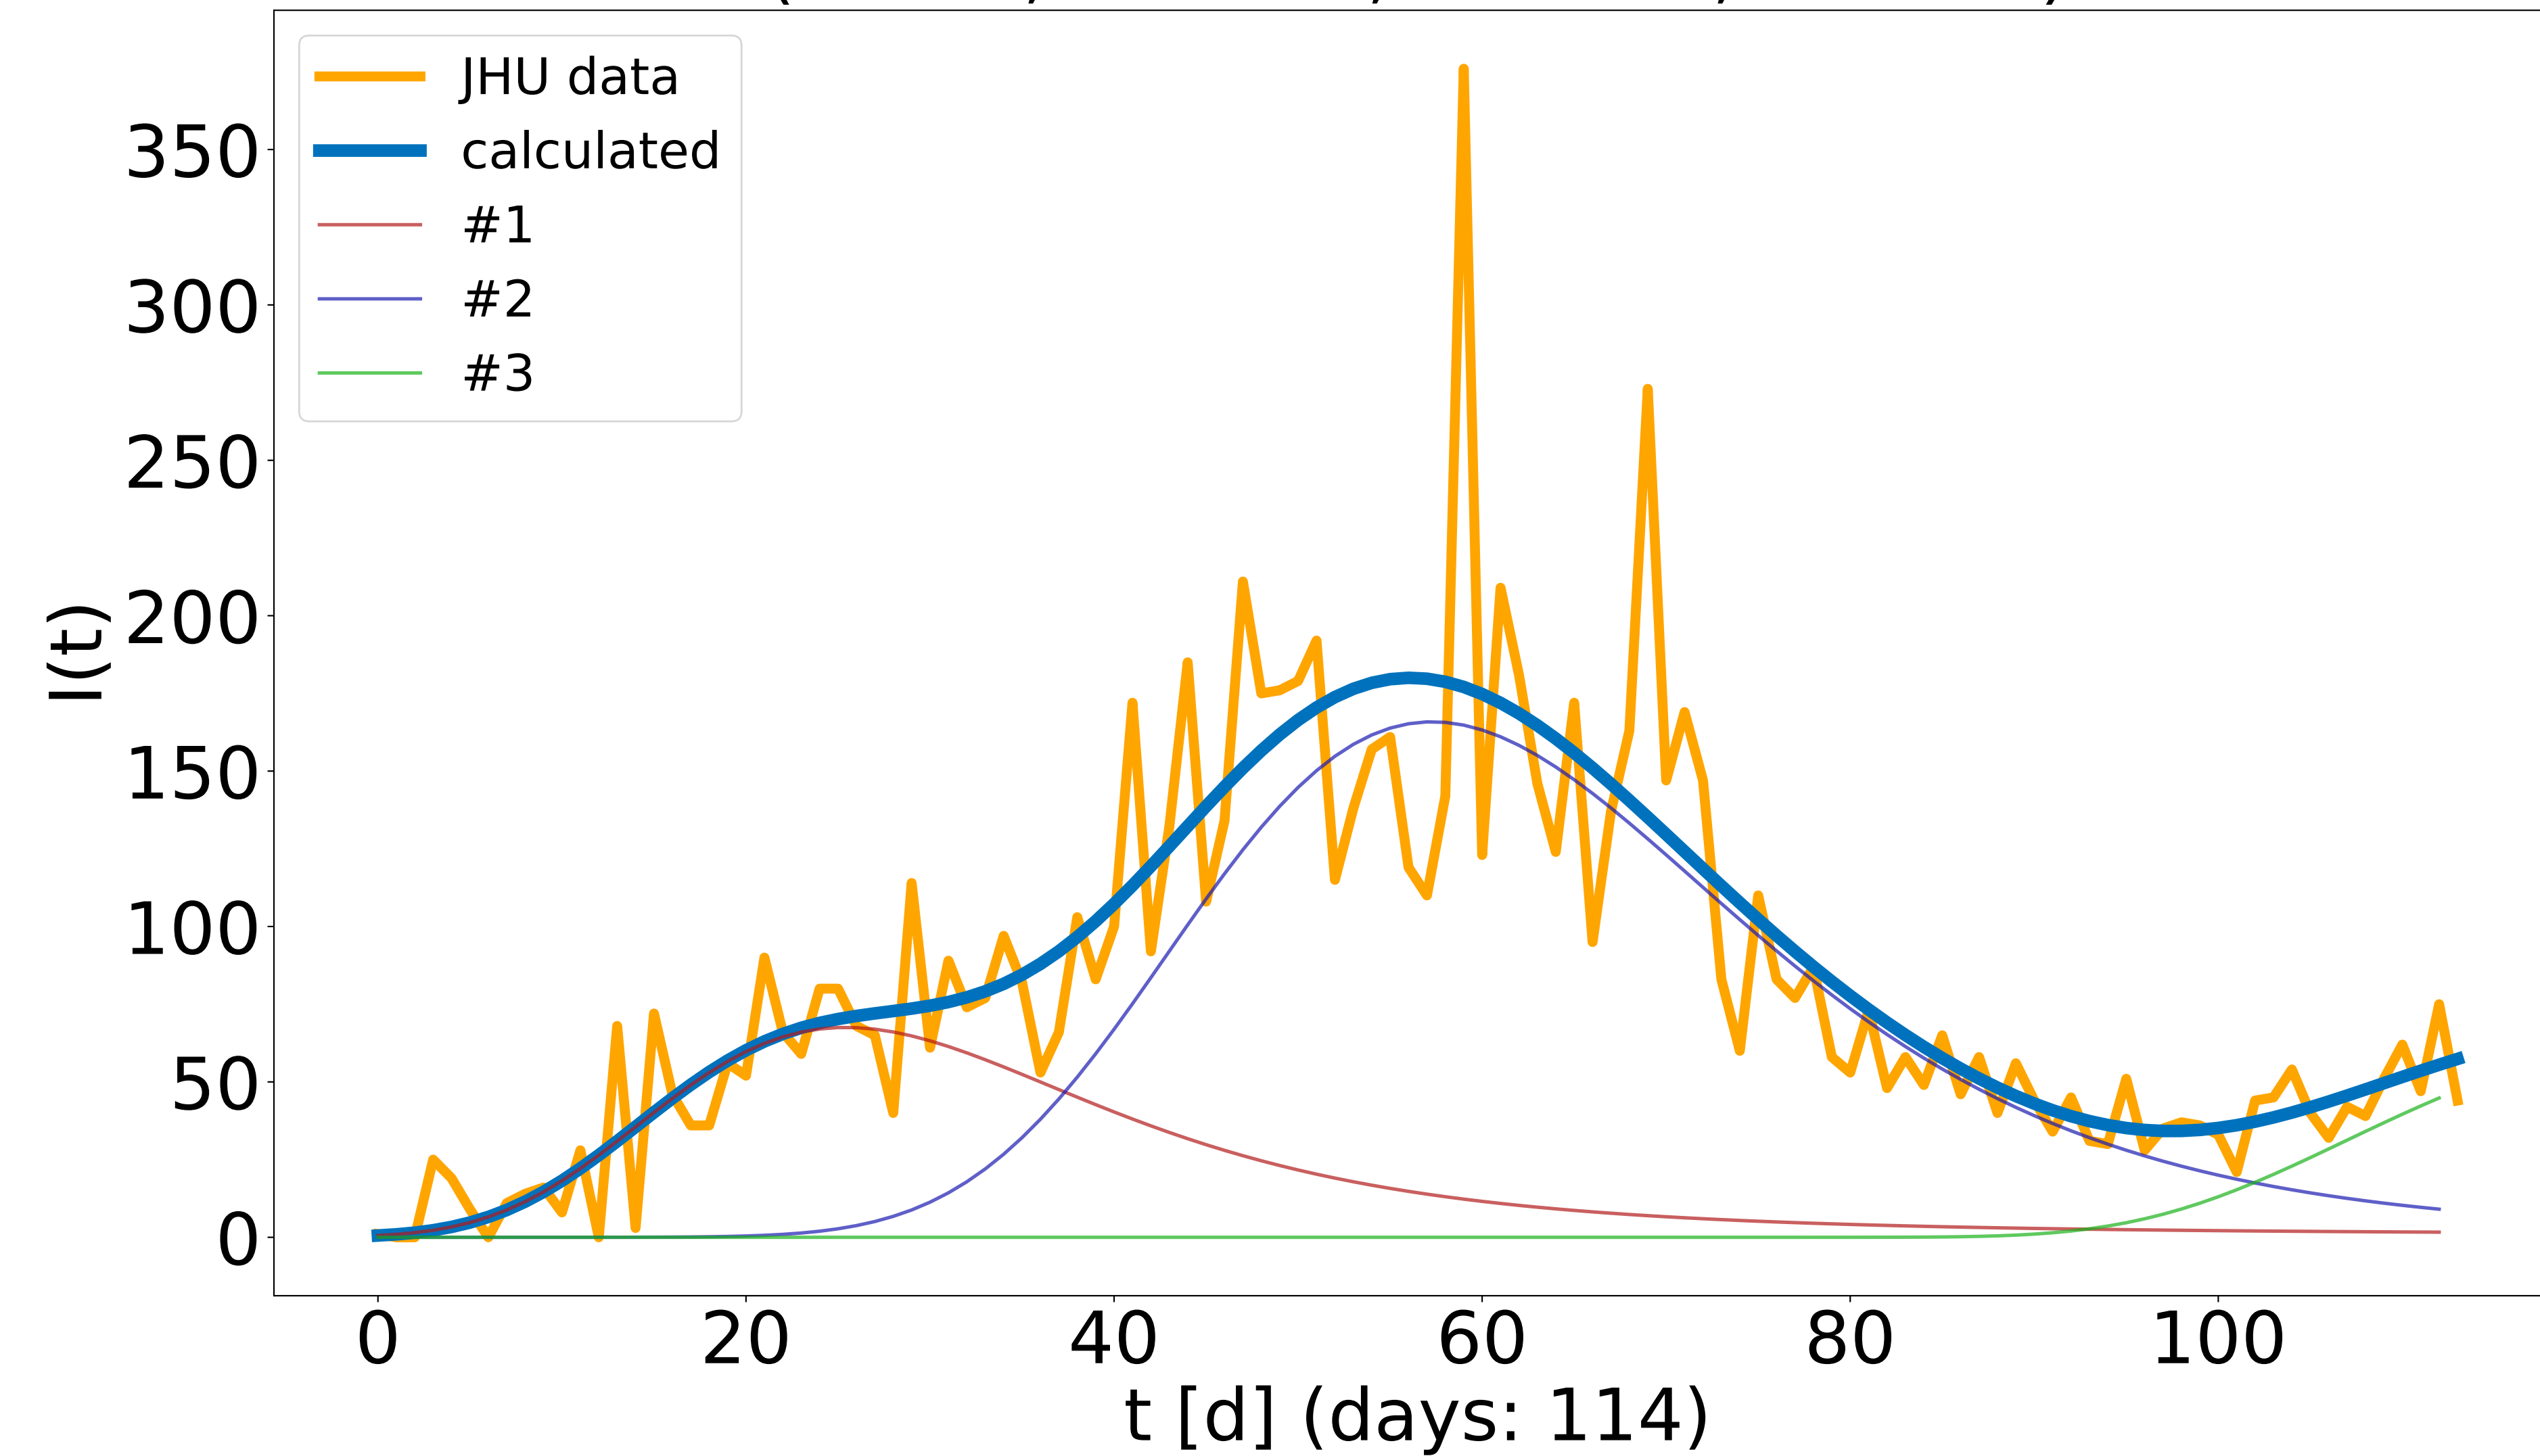

DuPage, Illinois, US, DuPage ( $R^2 = 0.974$ )  
(i: 36.3, a: 0.12, b: 0.06, t: 14.1)  
(i: 0.1, a: 1.04, b: 0.055, t: 30.3)  
(i: 0.1, a: 1.008, b: 0.053, t: 45.8)

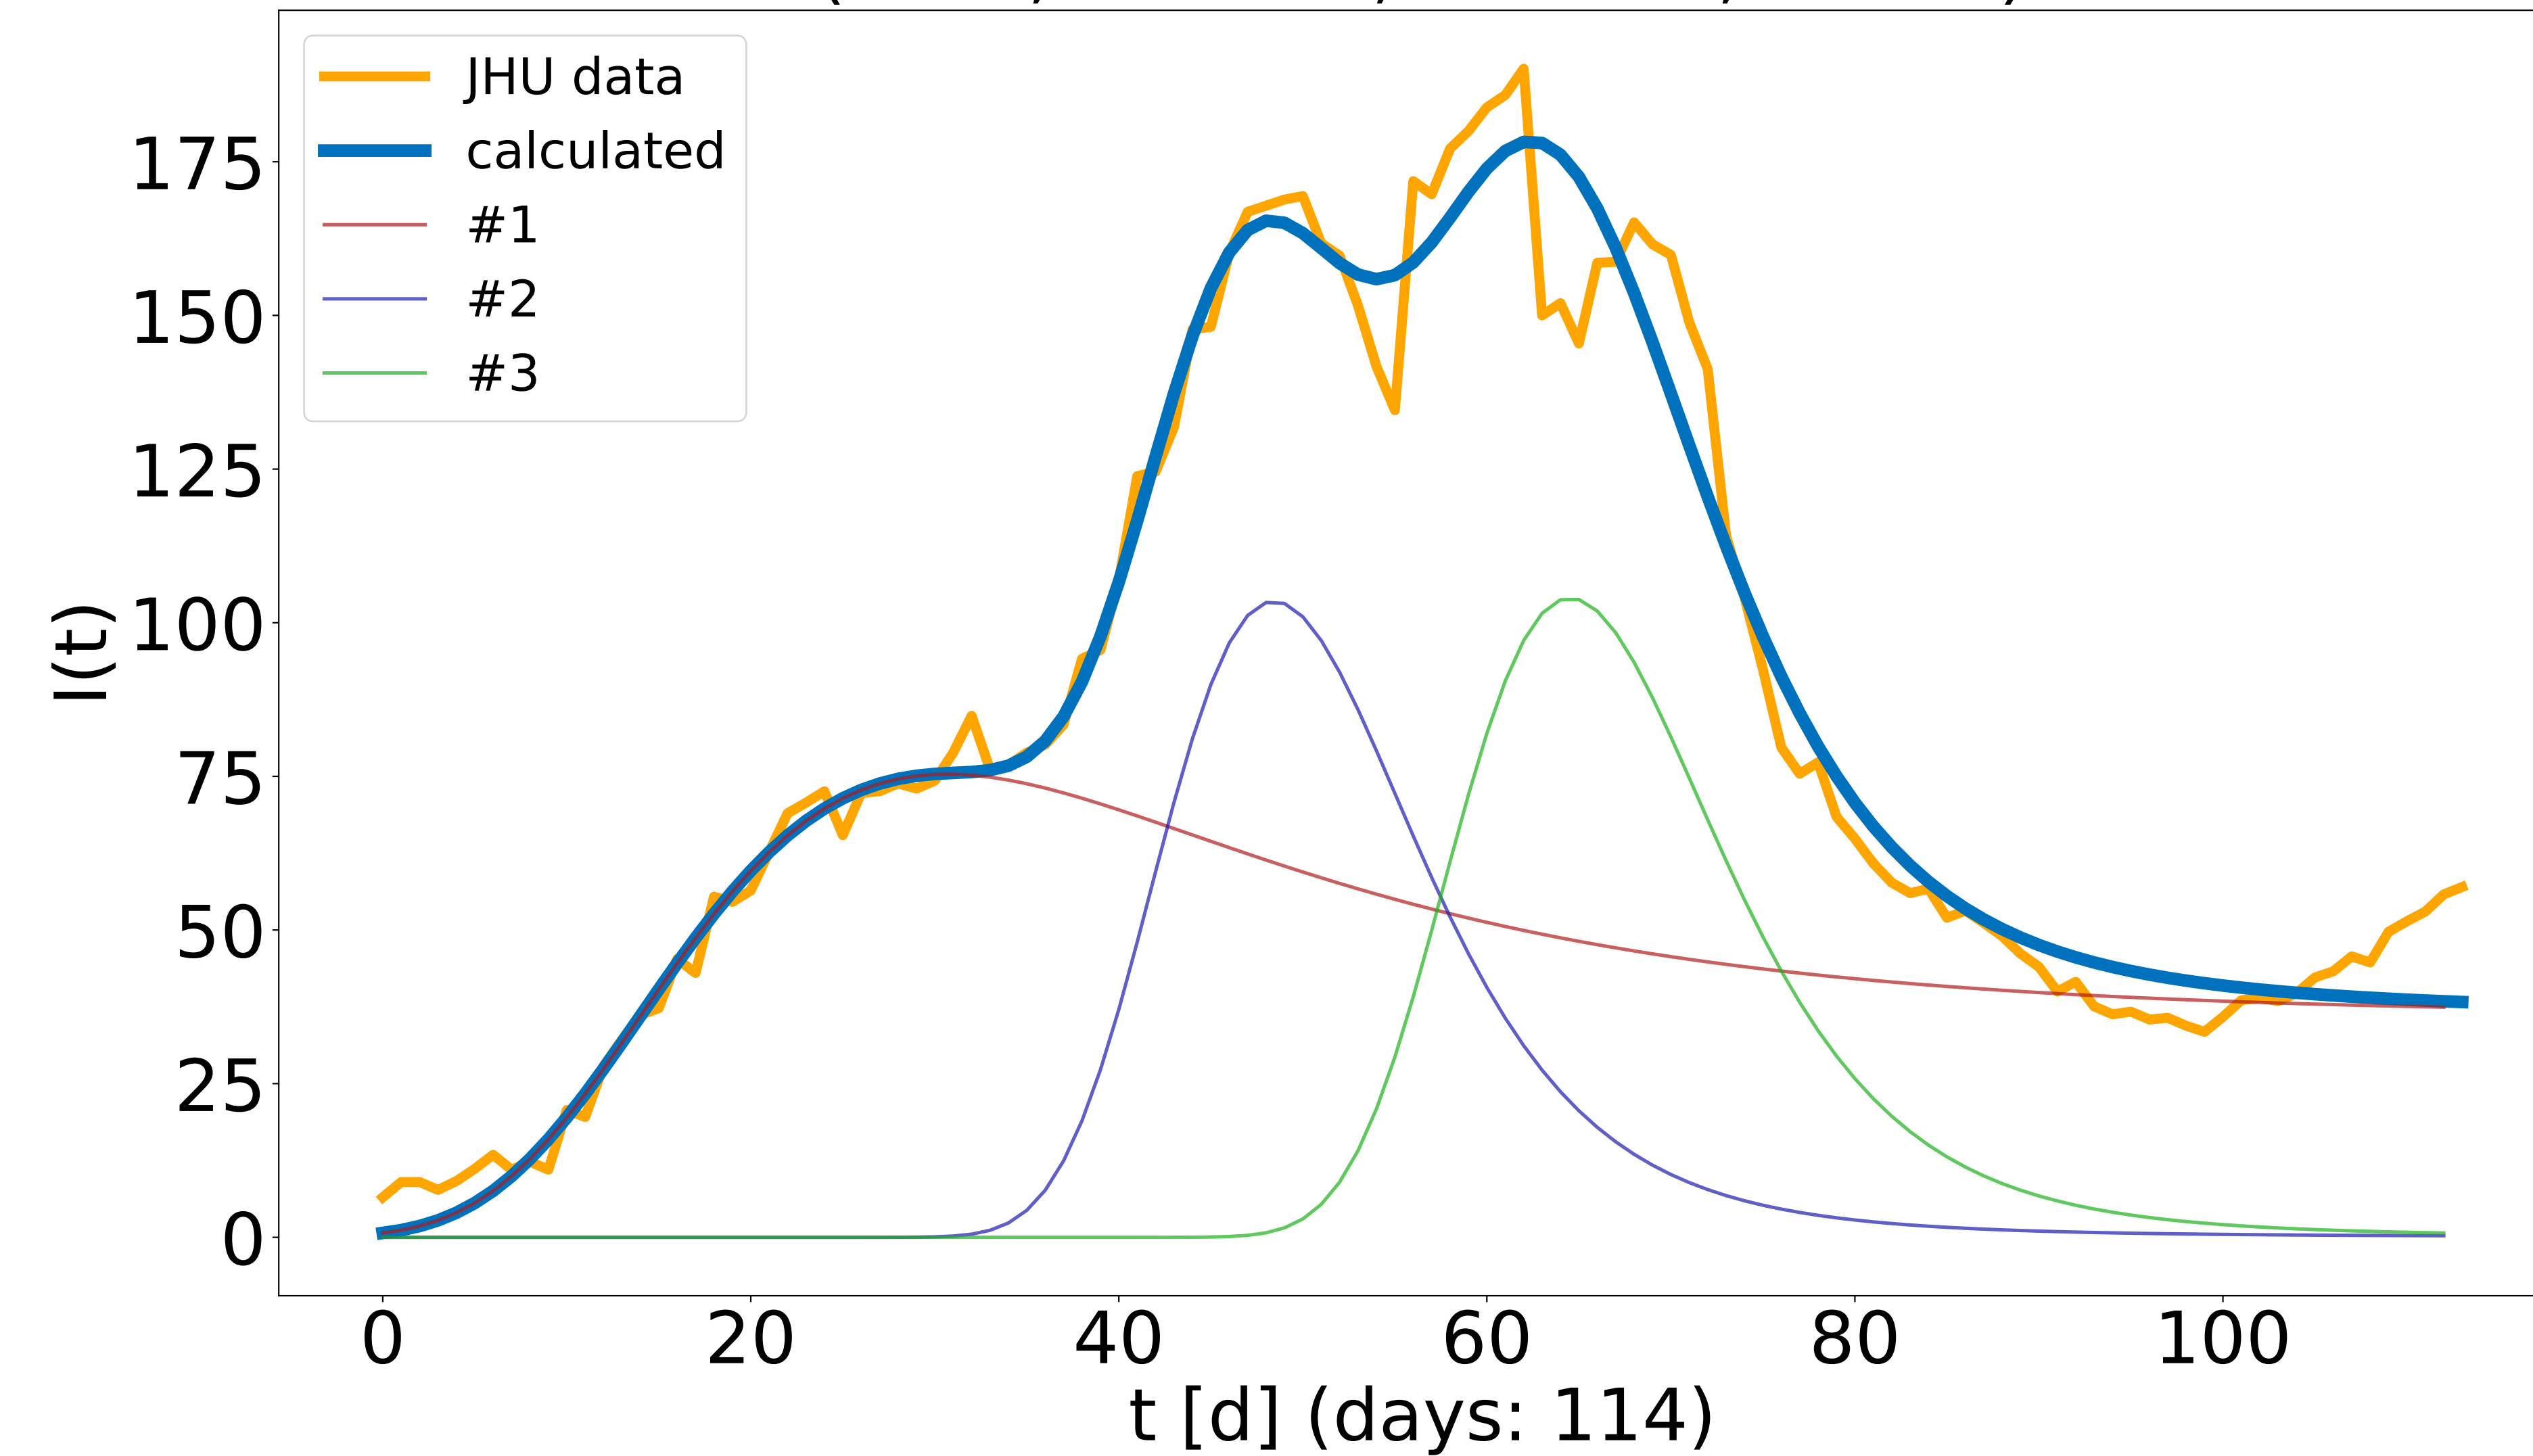

Lake, Illinois, US, Lake ( $R^2 = 0.666$ )  
(i: 0.5, a: 0.479, b: 0.033, t: 1.0)  
(i: 0.1, a: 0.503, b: 0.025, t: 21.7)  
(i: 32.6, a: 0.001, b: 0.291, t: 115.2)

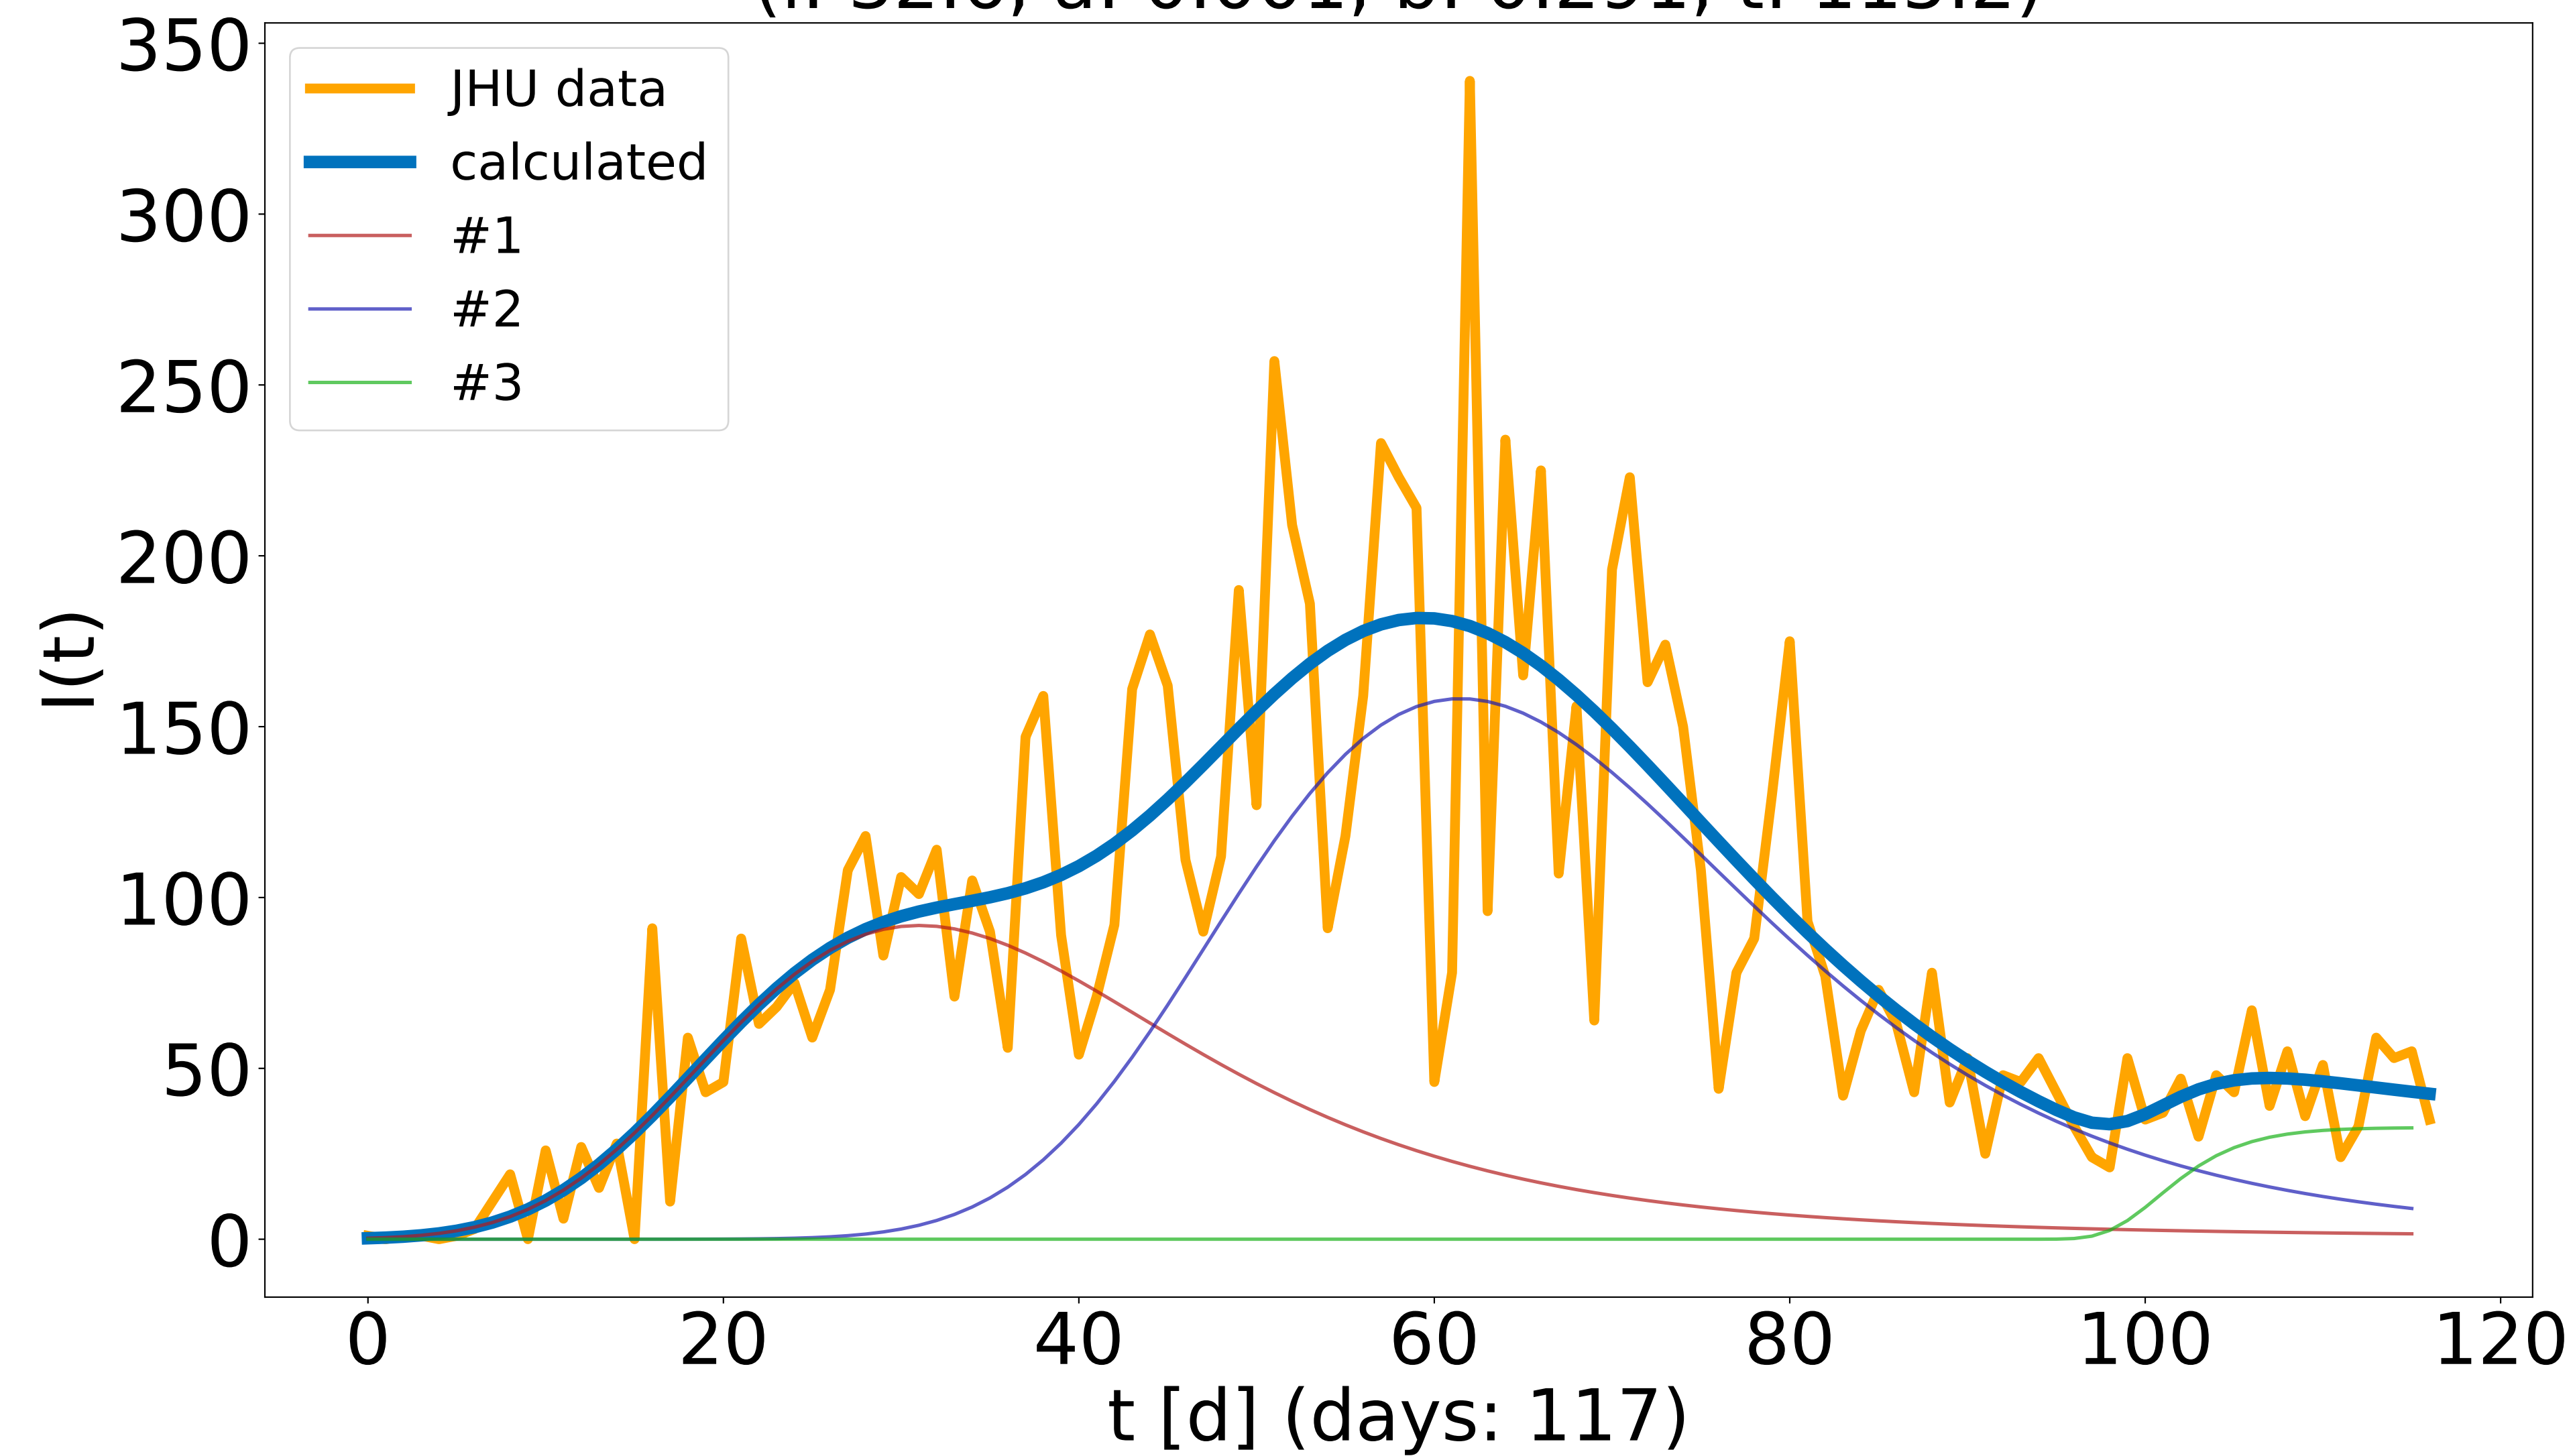

Lake, Illinois, US, Lake ( $R^2 = 0.985$ )  
(i: 0.6, a: 0.442, b: 0.033, t: 1.0)  
(i: 0.1, a: 0.502, b: 0.025, t: 22.0)  
(i: 34.1, a: 0.001, b: 0.205, t: 120.1)

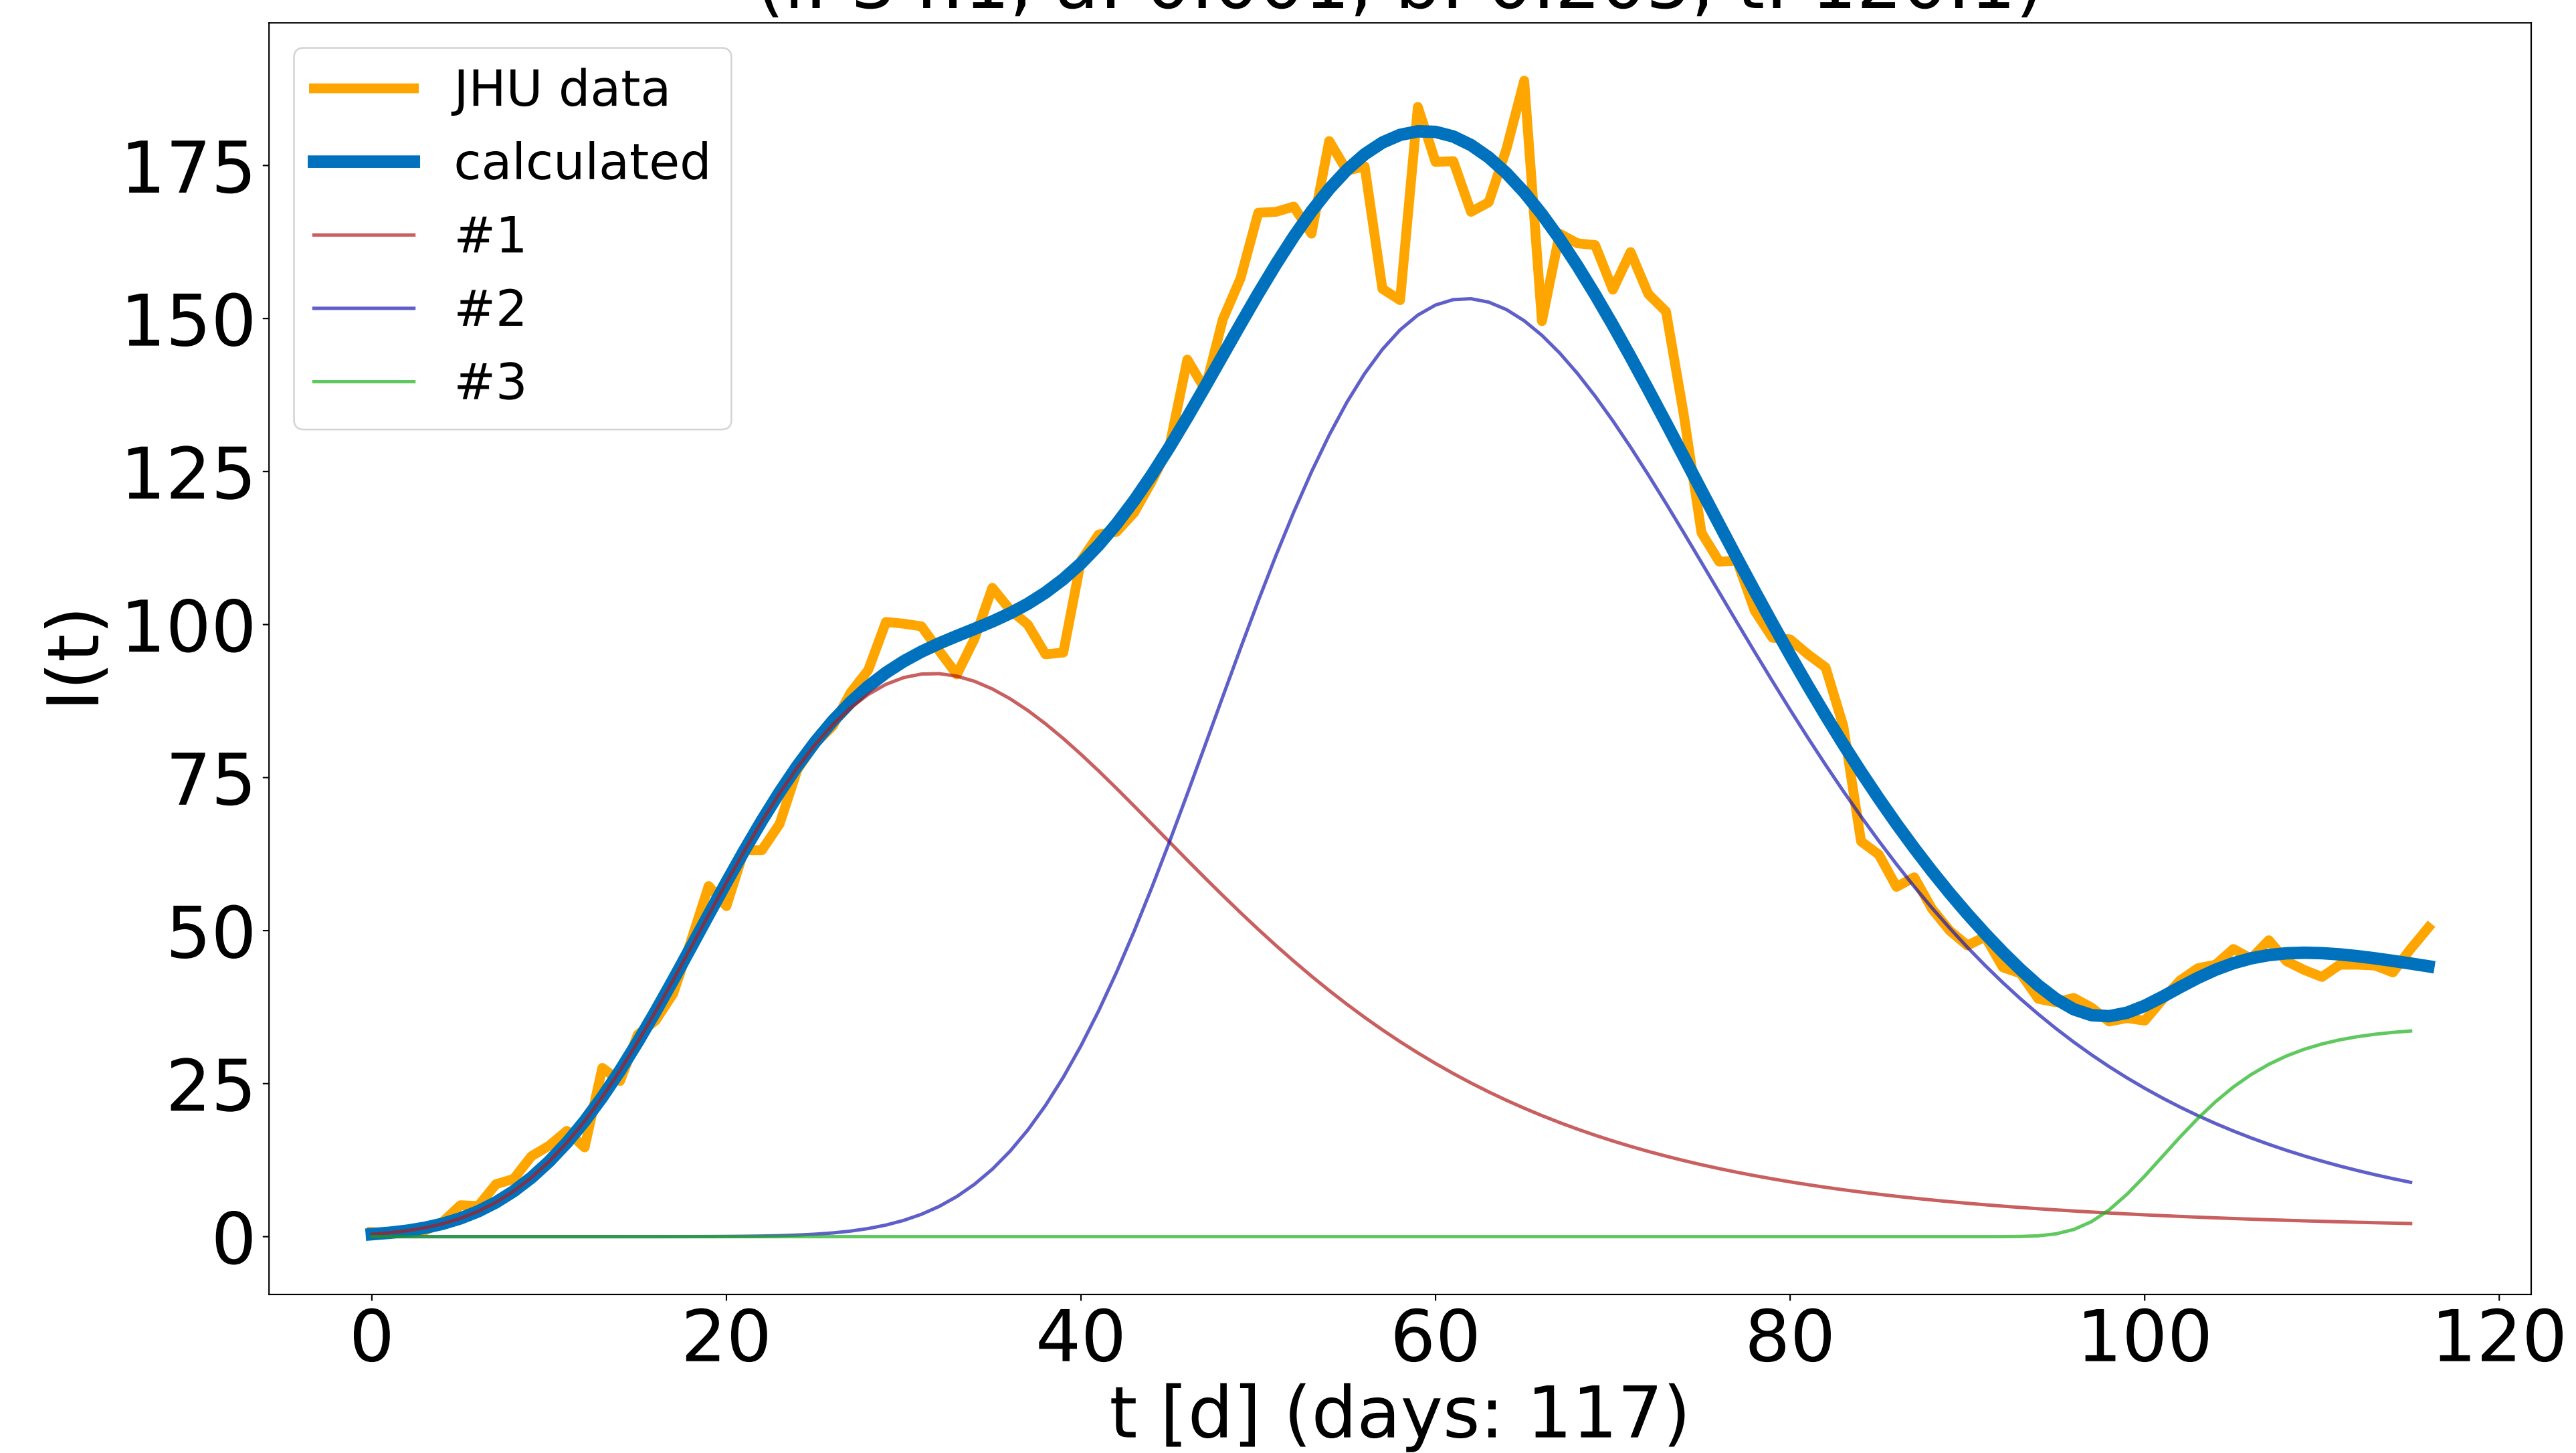

Cass, Indiana, US, Cass ( $R^2 = 0.595$ )  
(i: 0.1, a: 2.0, b: 0.137, t: 15.0)  
(i: 10.2, a: 2.0, b: 0.252, t: 23.6)  
(i: 1.7, a: 0.599, b: 1.041, t: 101.5)

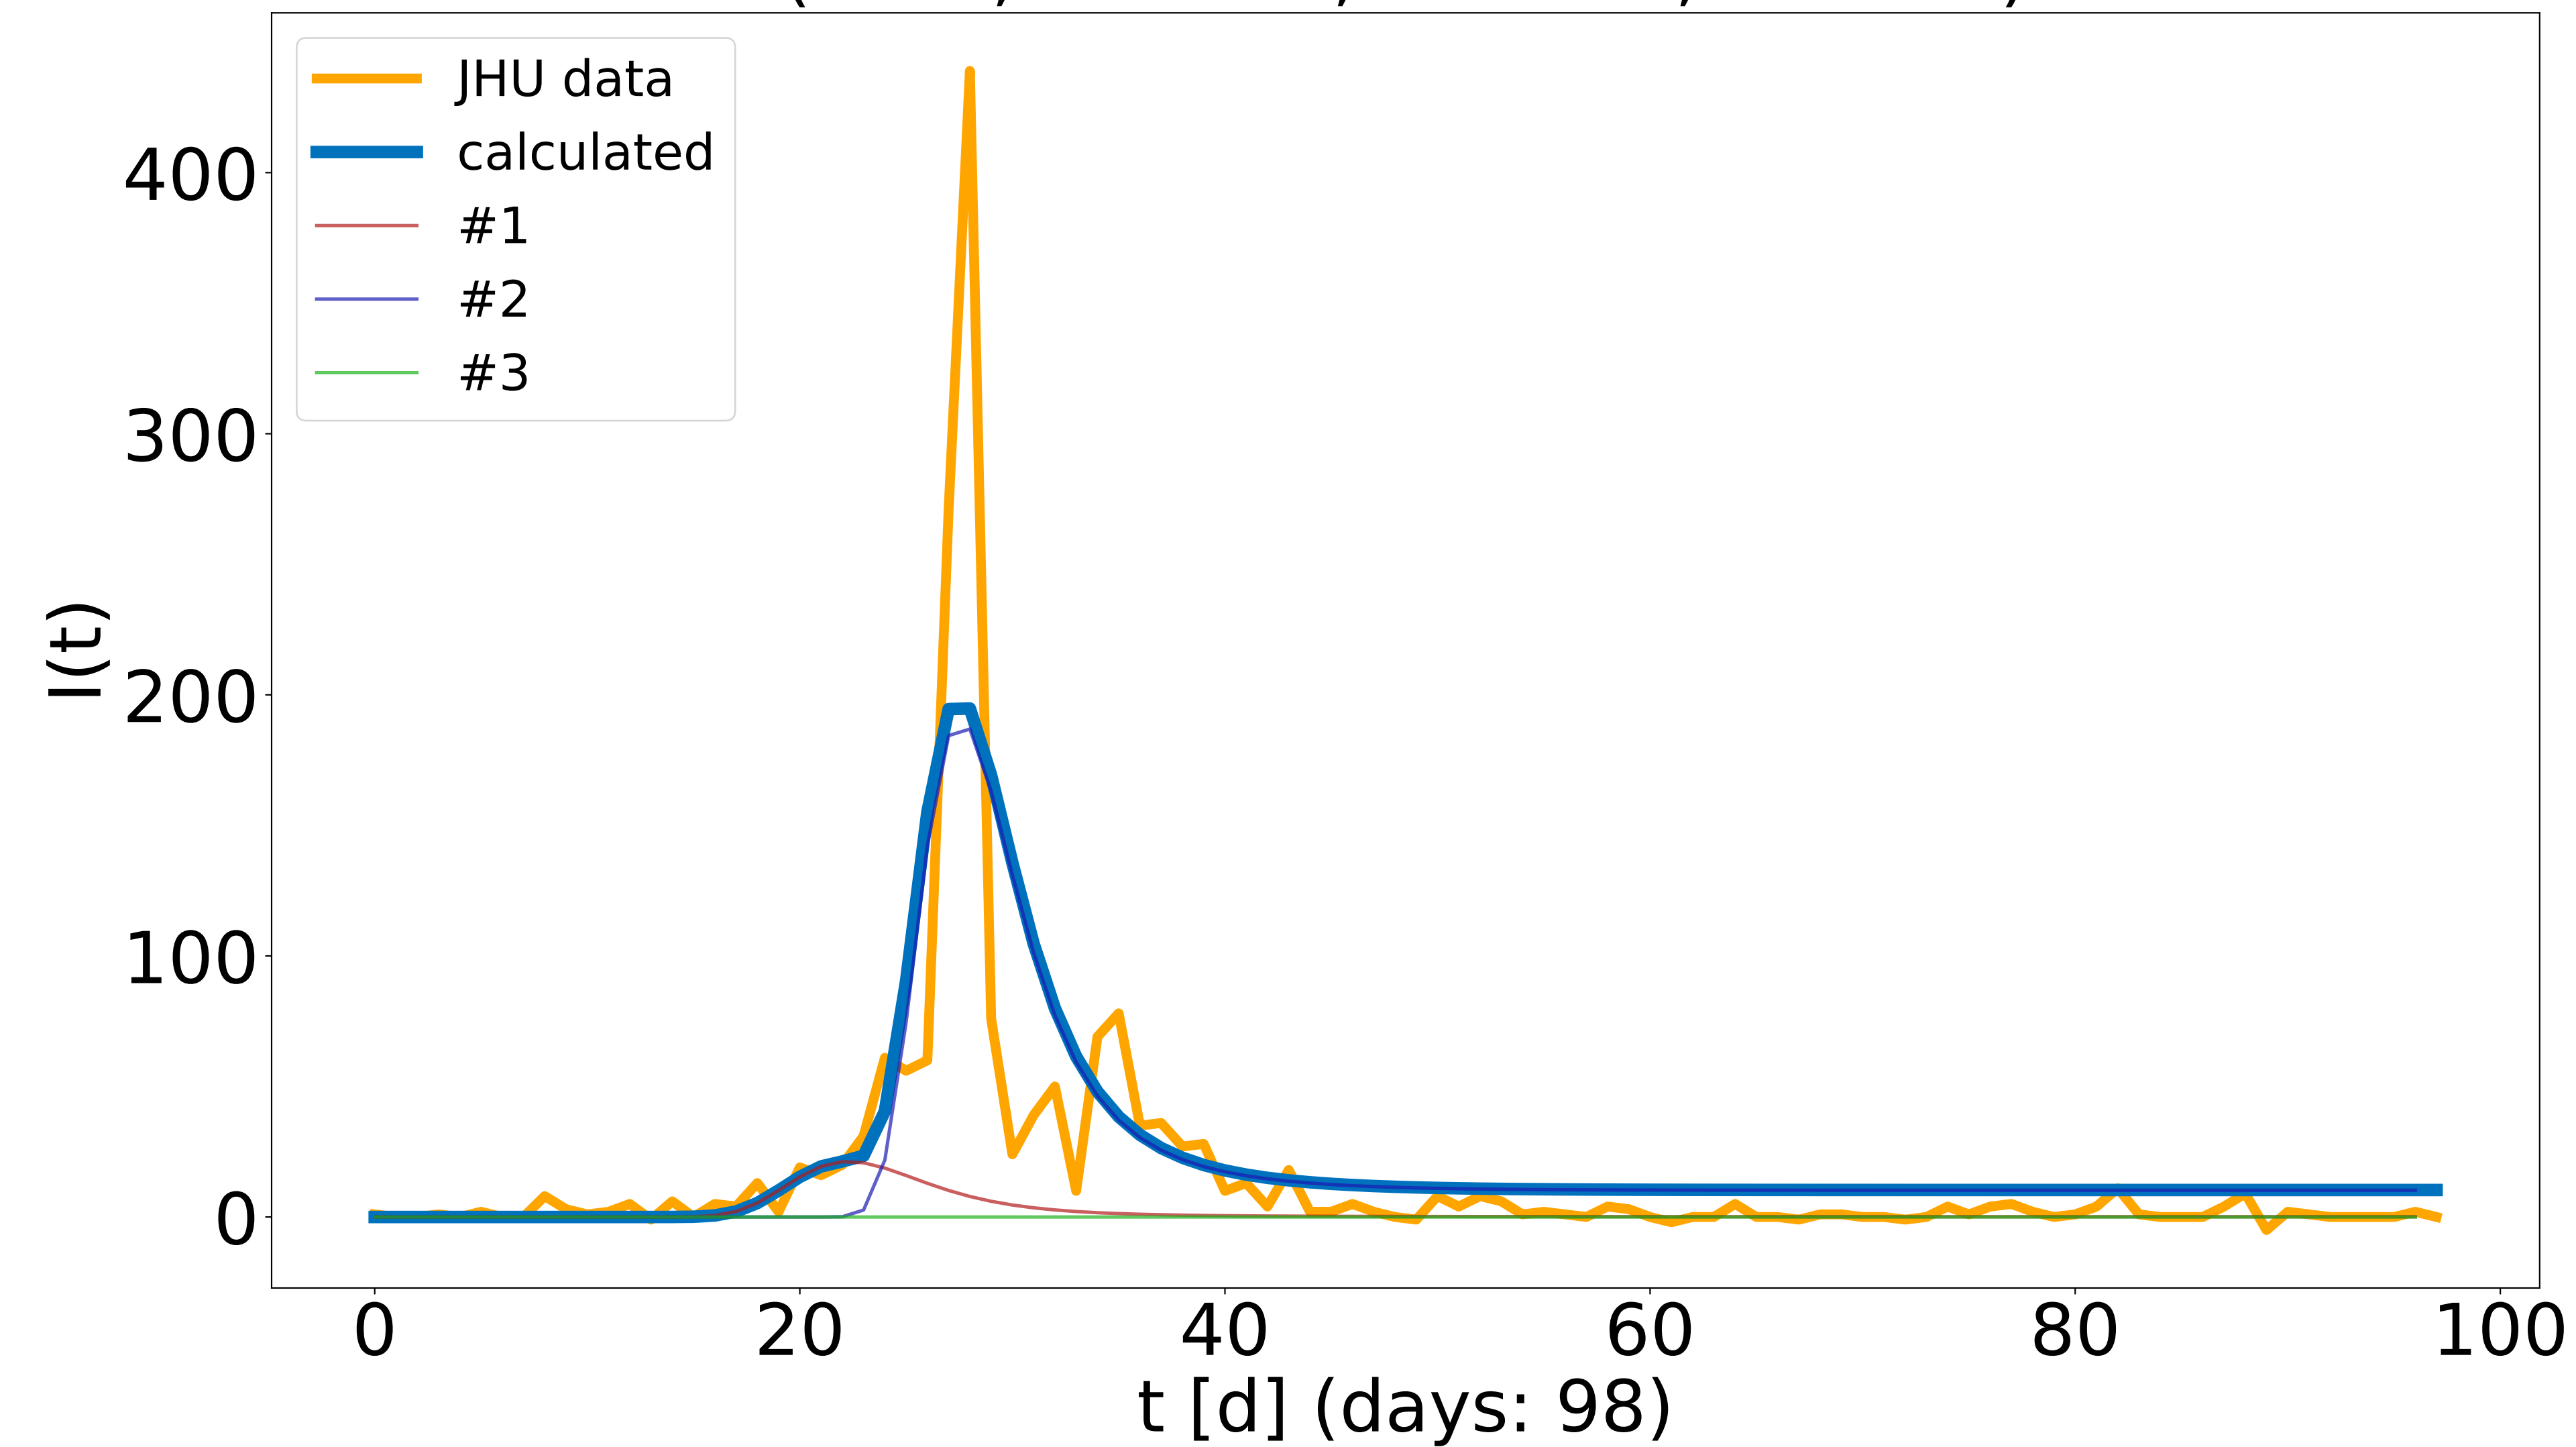

Cass, Indiana, US, Cass ( $R^2 = 0.978$ )  
(i: 0.1, a: 0.87, b: 0.058, t: 9.4)  
(i: 1.4, a: 2.0, b: 0.163, t: 20.9)  
(i: 1.5, a: 0.29, b: 0.893, t: 100.9)

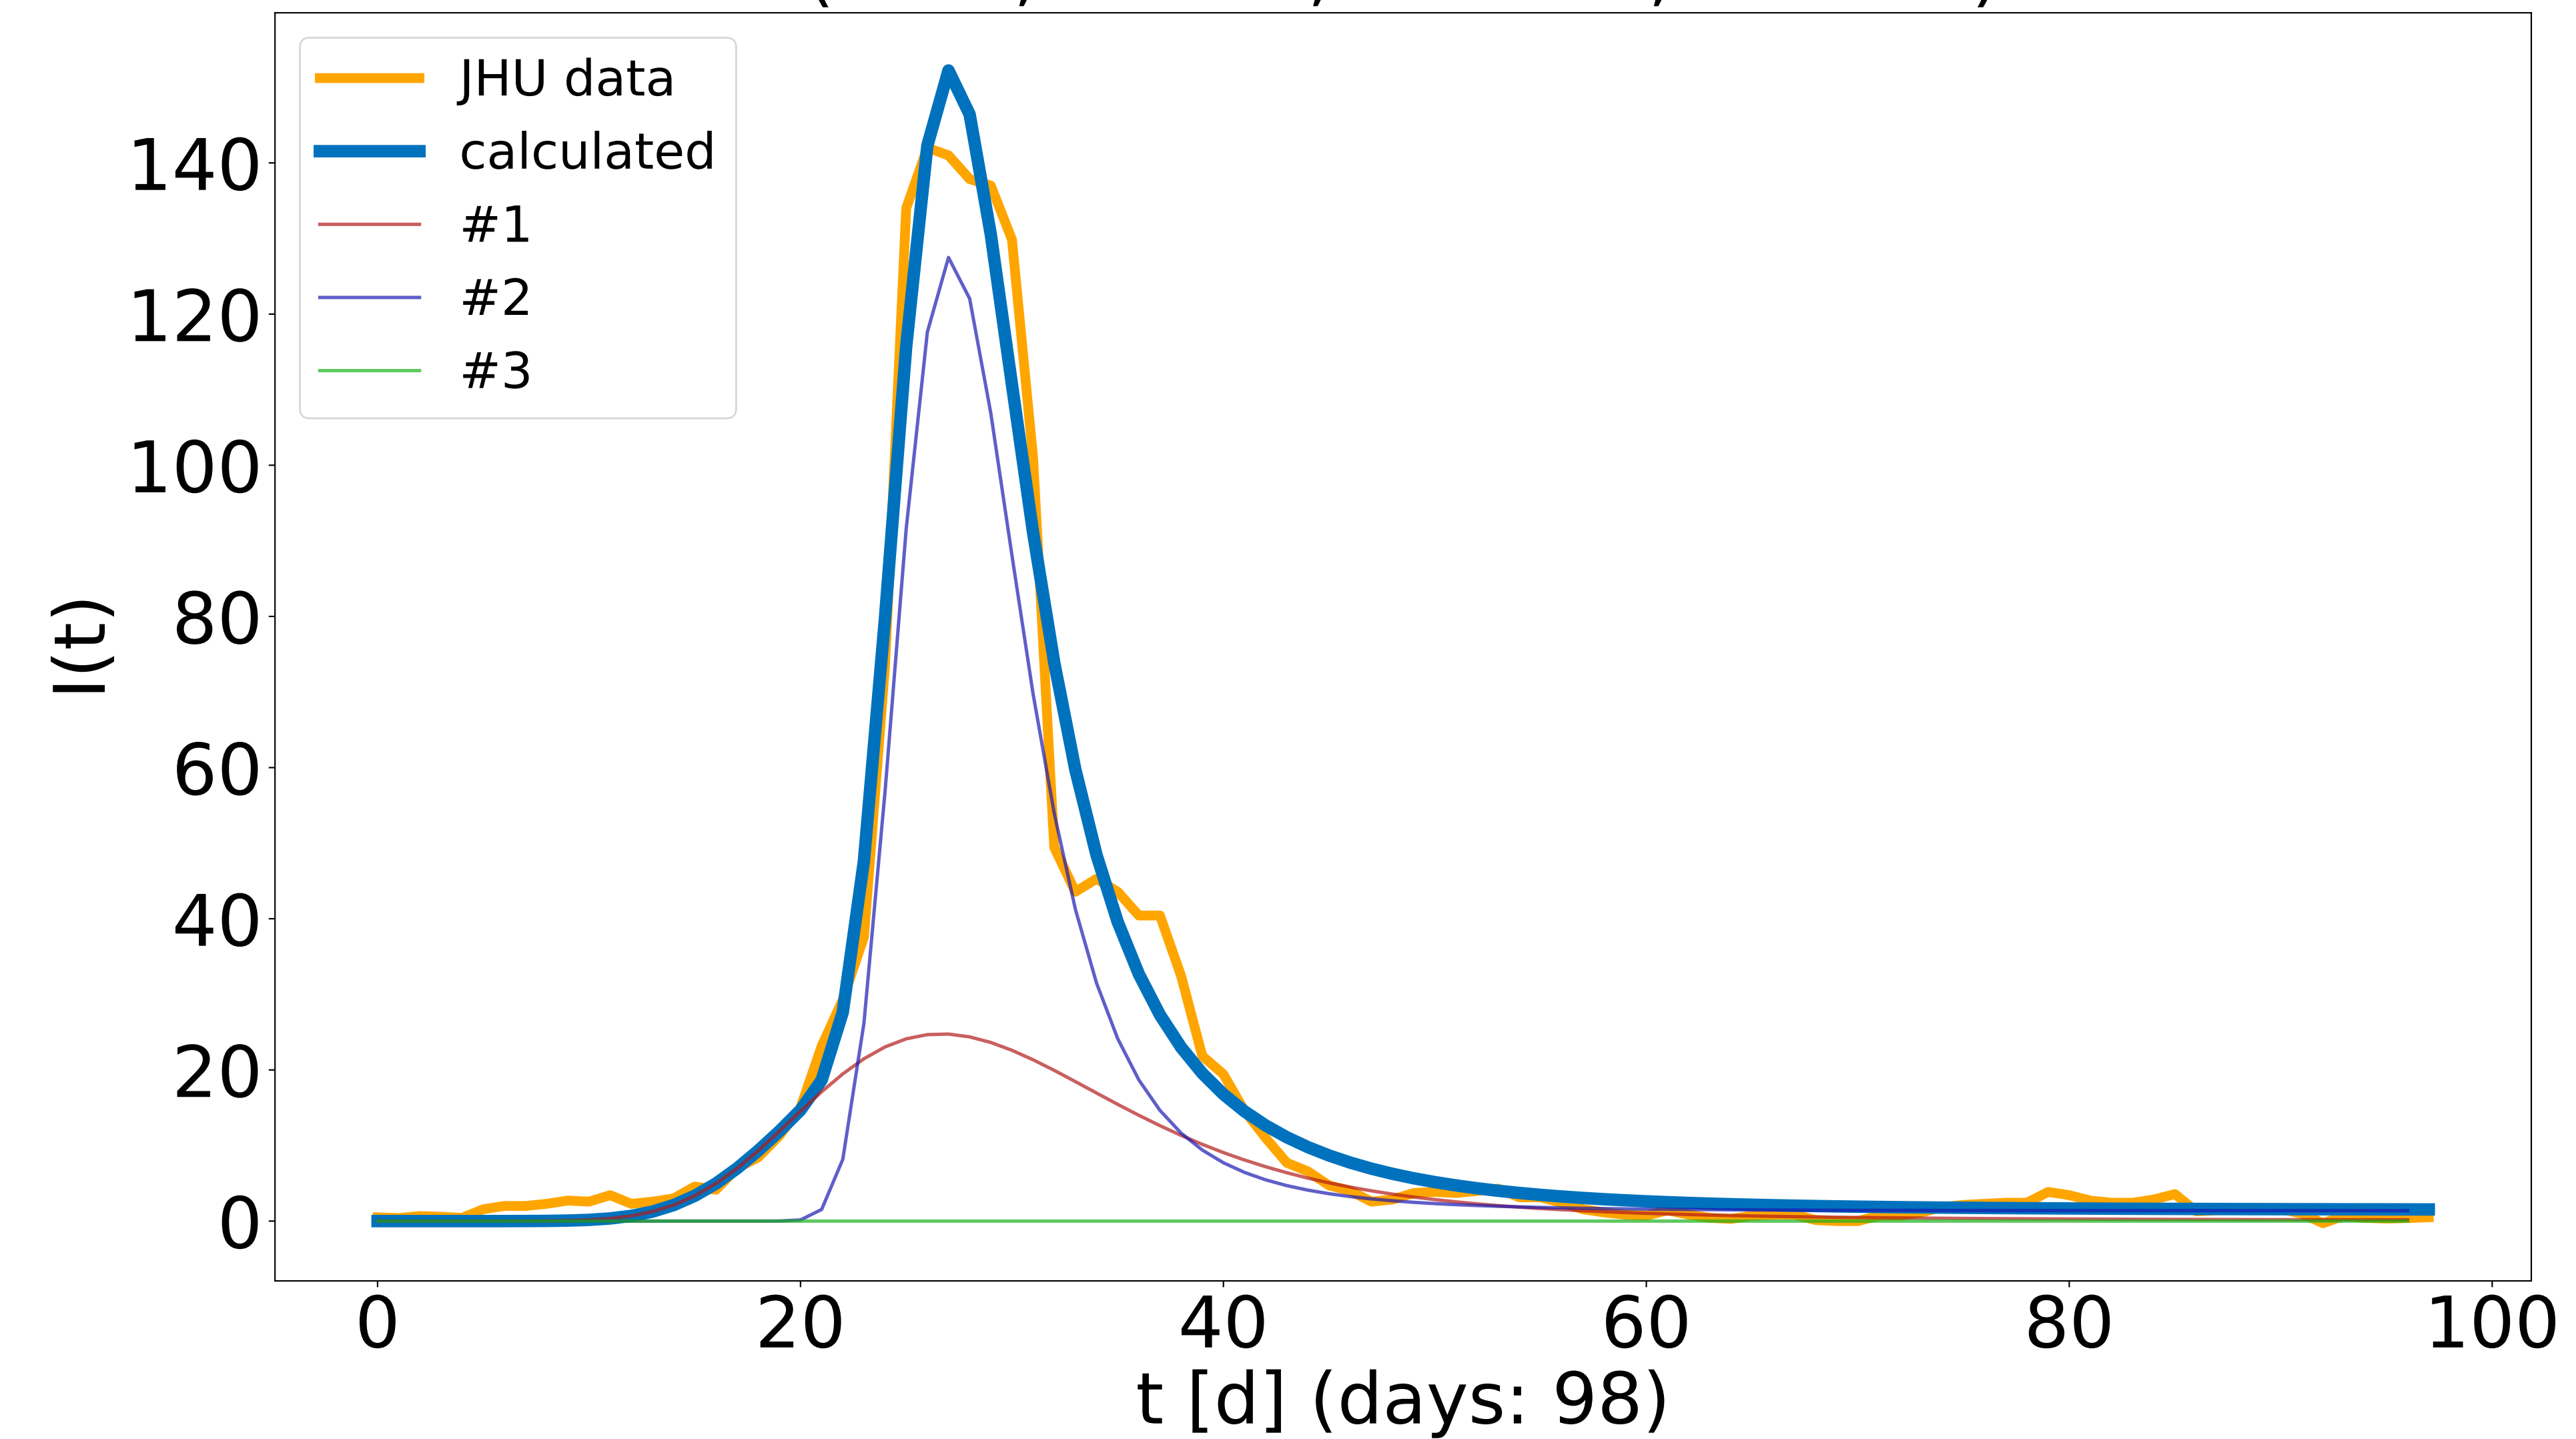



Elkhart, Indiana, US, Elkhart ( $R^2 = 0.676$ )  
(i: 0.4, a: 0.271, b: 0.029, t: 1.0)  
(i: 0.1, a: 0.371, b: 0.022, t: 29.0)  
(i: 24.8, a: 2.0, b: 1.4, t: 83.3)

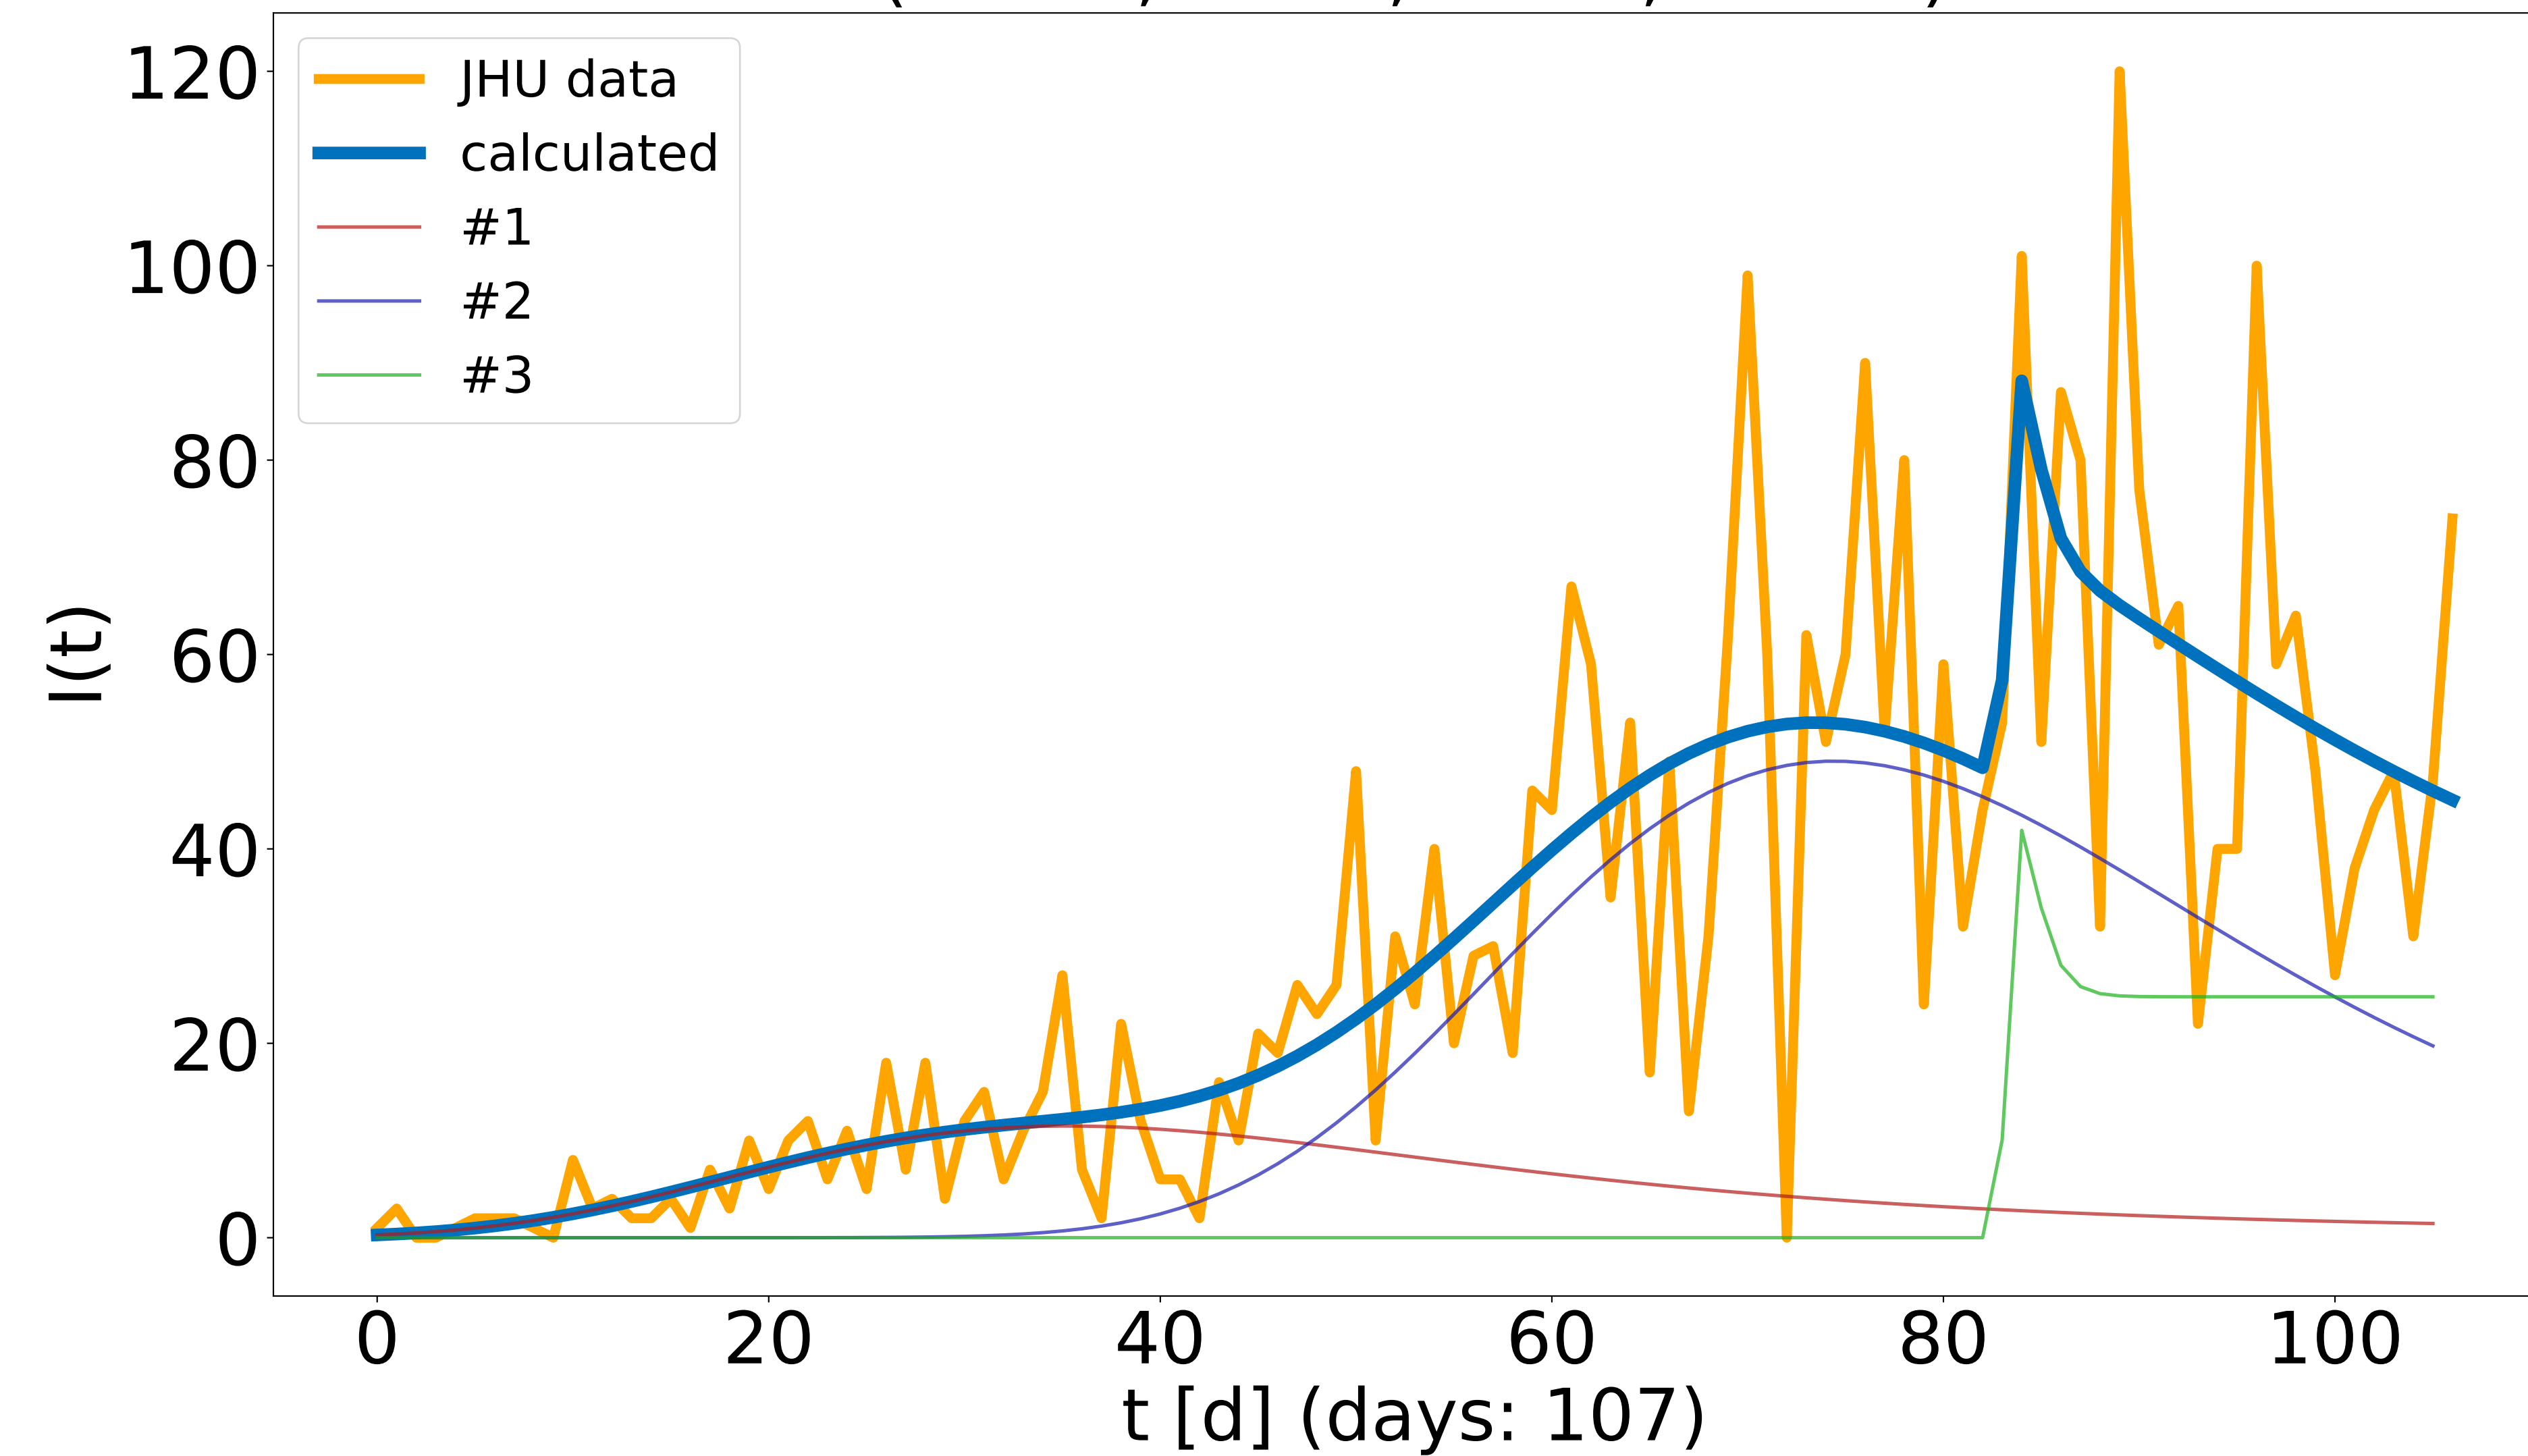

Elkhart, Indiana, US, Elkhart ( $R^2 = 0.982$ )  
(i: 0.1, a: 0.484, b: 0.039, t: 1.8)  
(i: 11.2, a: 0.115, b: 0.027, t: 44.0)  
(i: 0.6, a: 2.0, b: 0.209, t: 82.3)

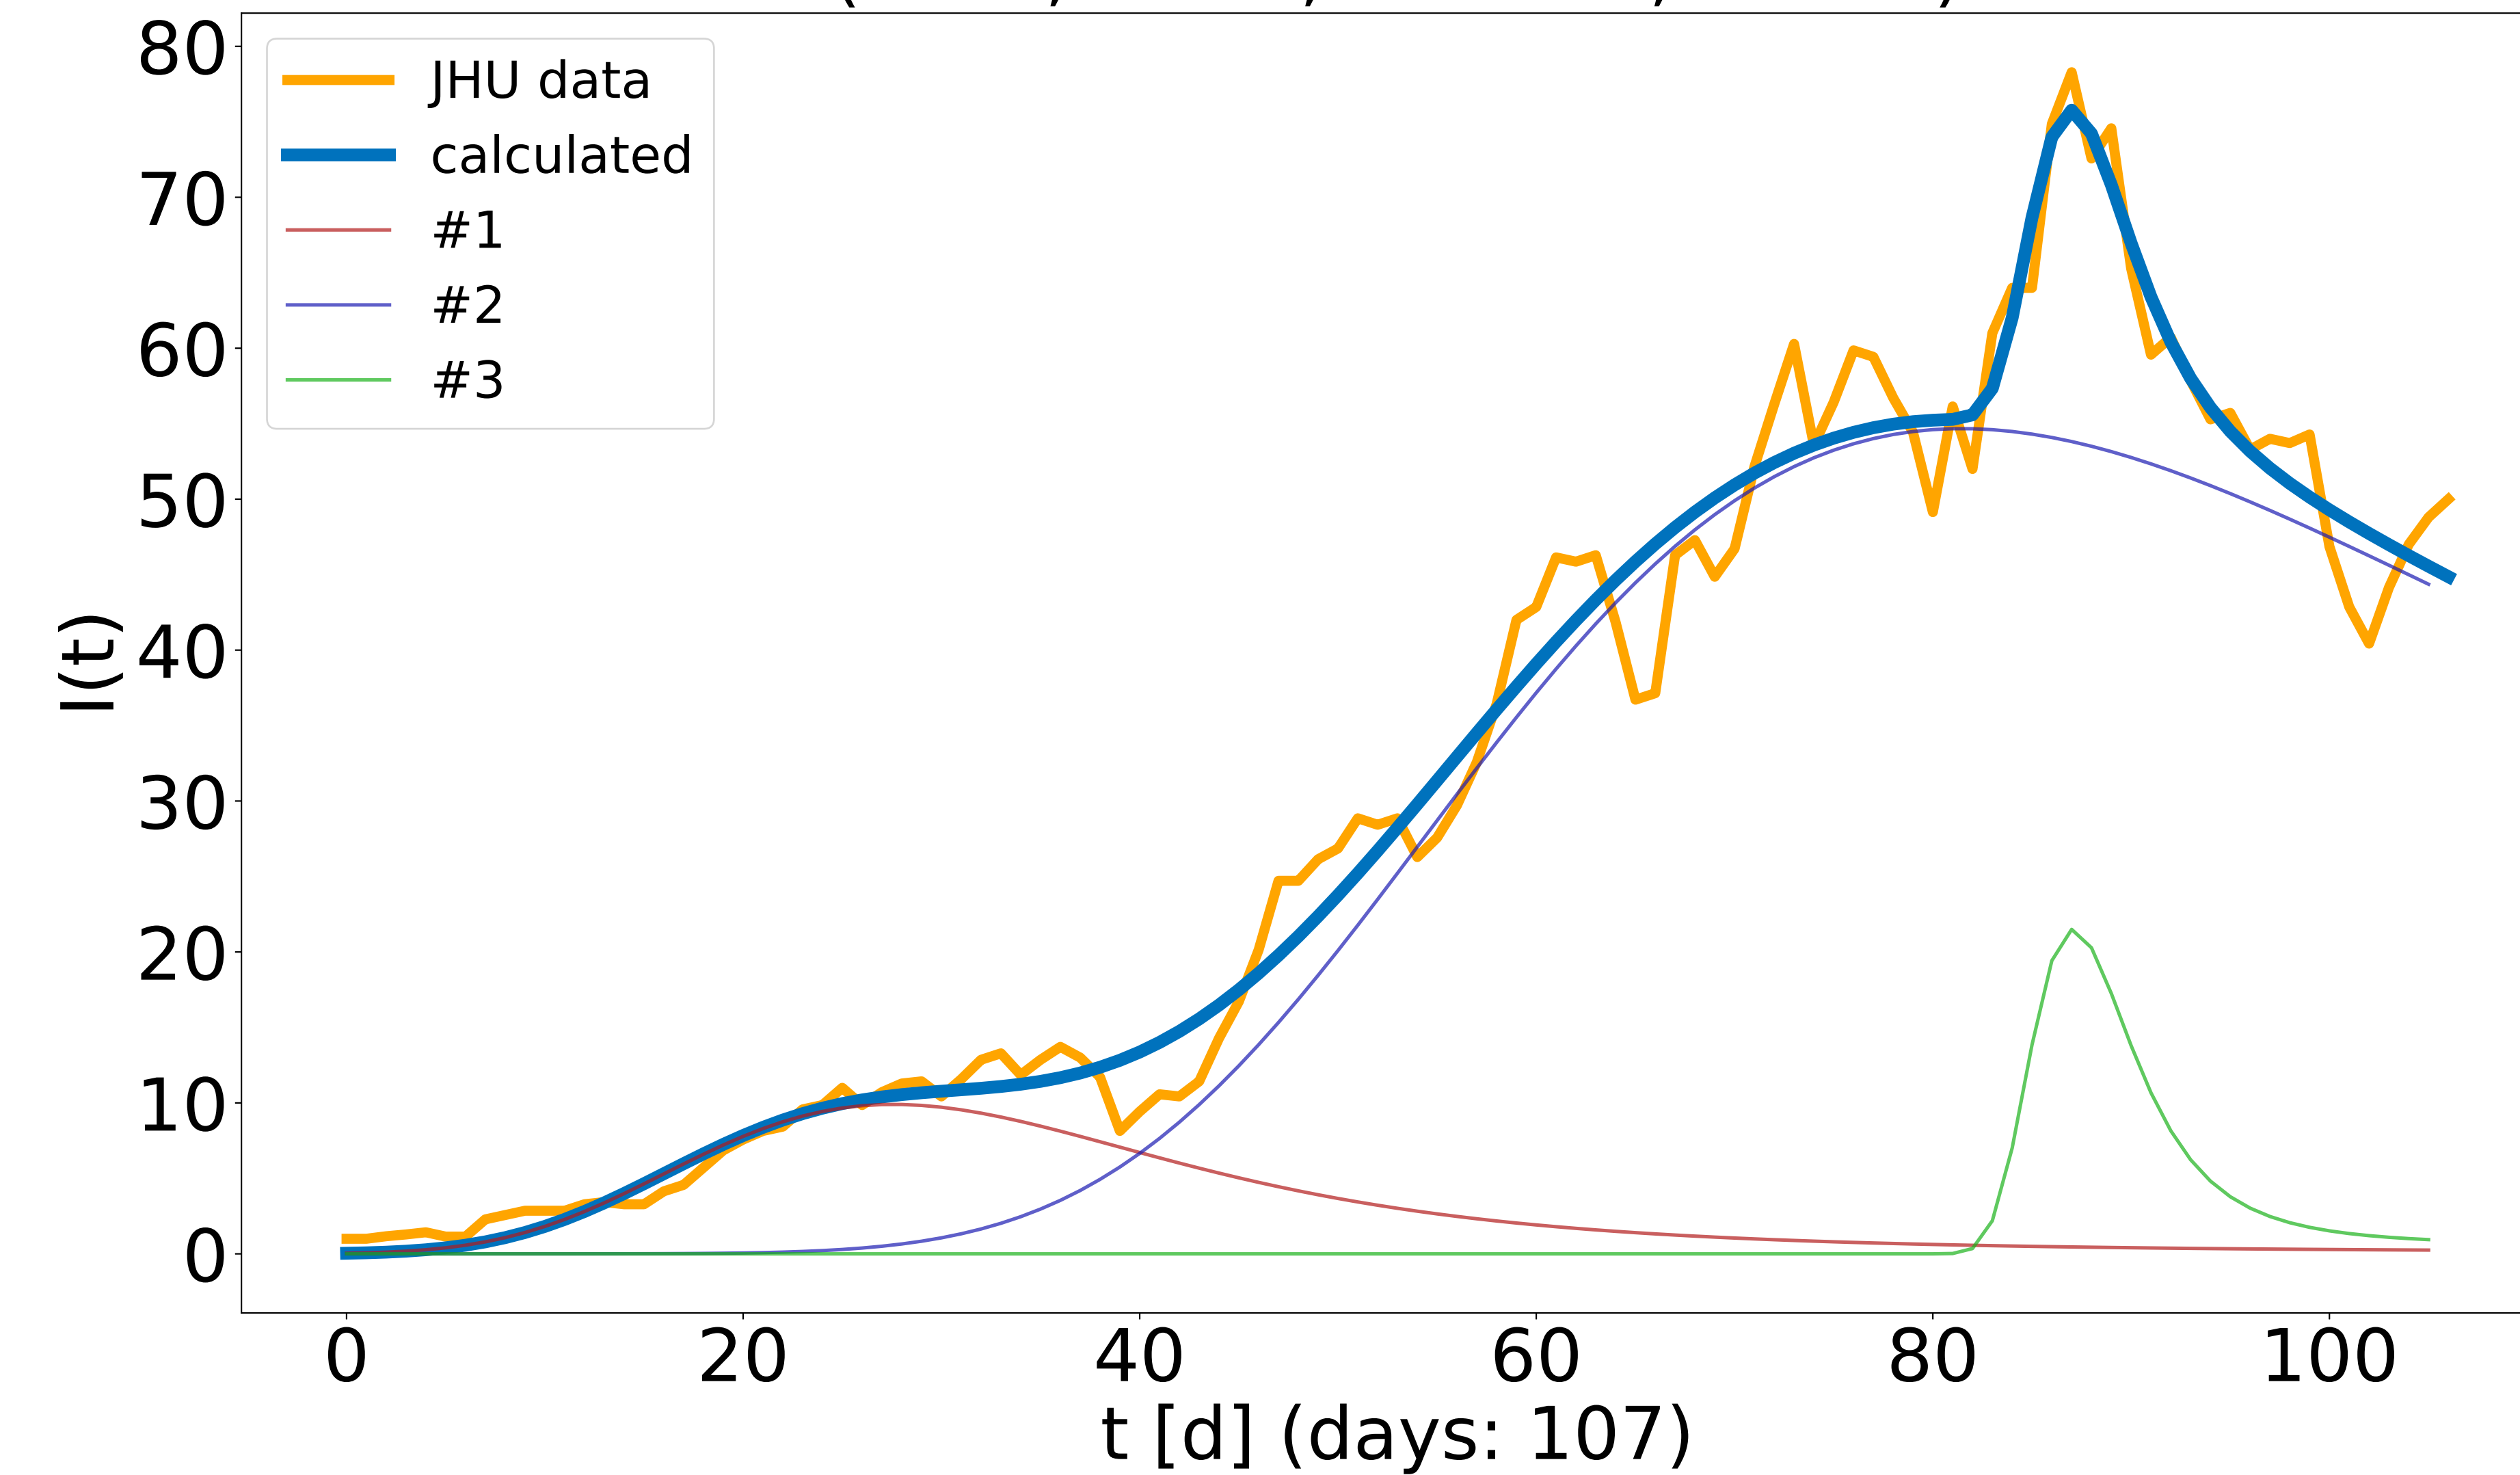

Black Hawk, Iowa, US, Black Hawk ( $R^2 = 0.719$ )

(i: 0.1, a: 1.187, b: 0.069, t: 21.1)

(i: 7.8, a: 1.315, b: 0.226, t: 35.5)

(i: 23.9, a: 1.068, b: 1.4, t: 98.7)

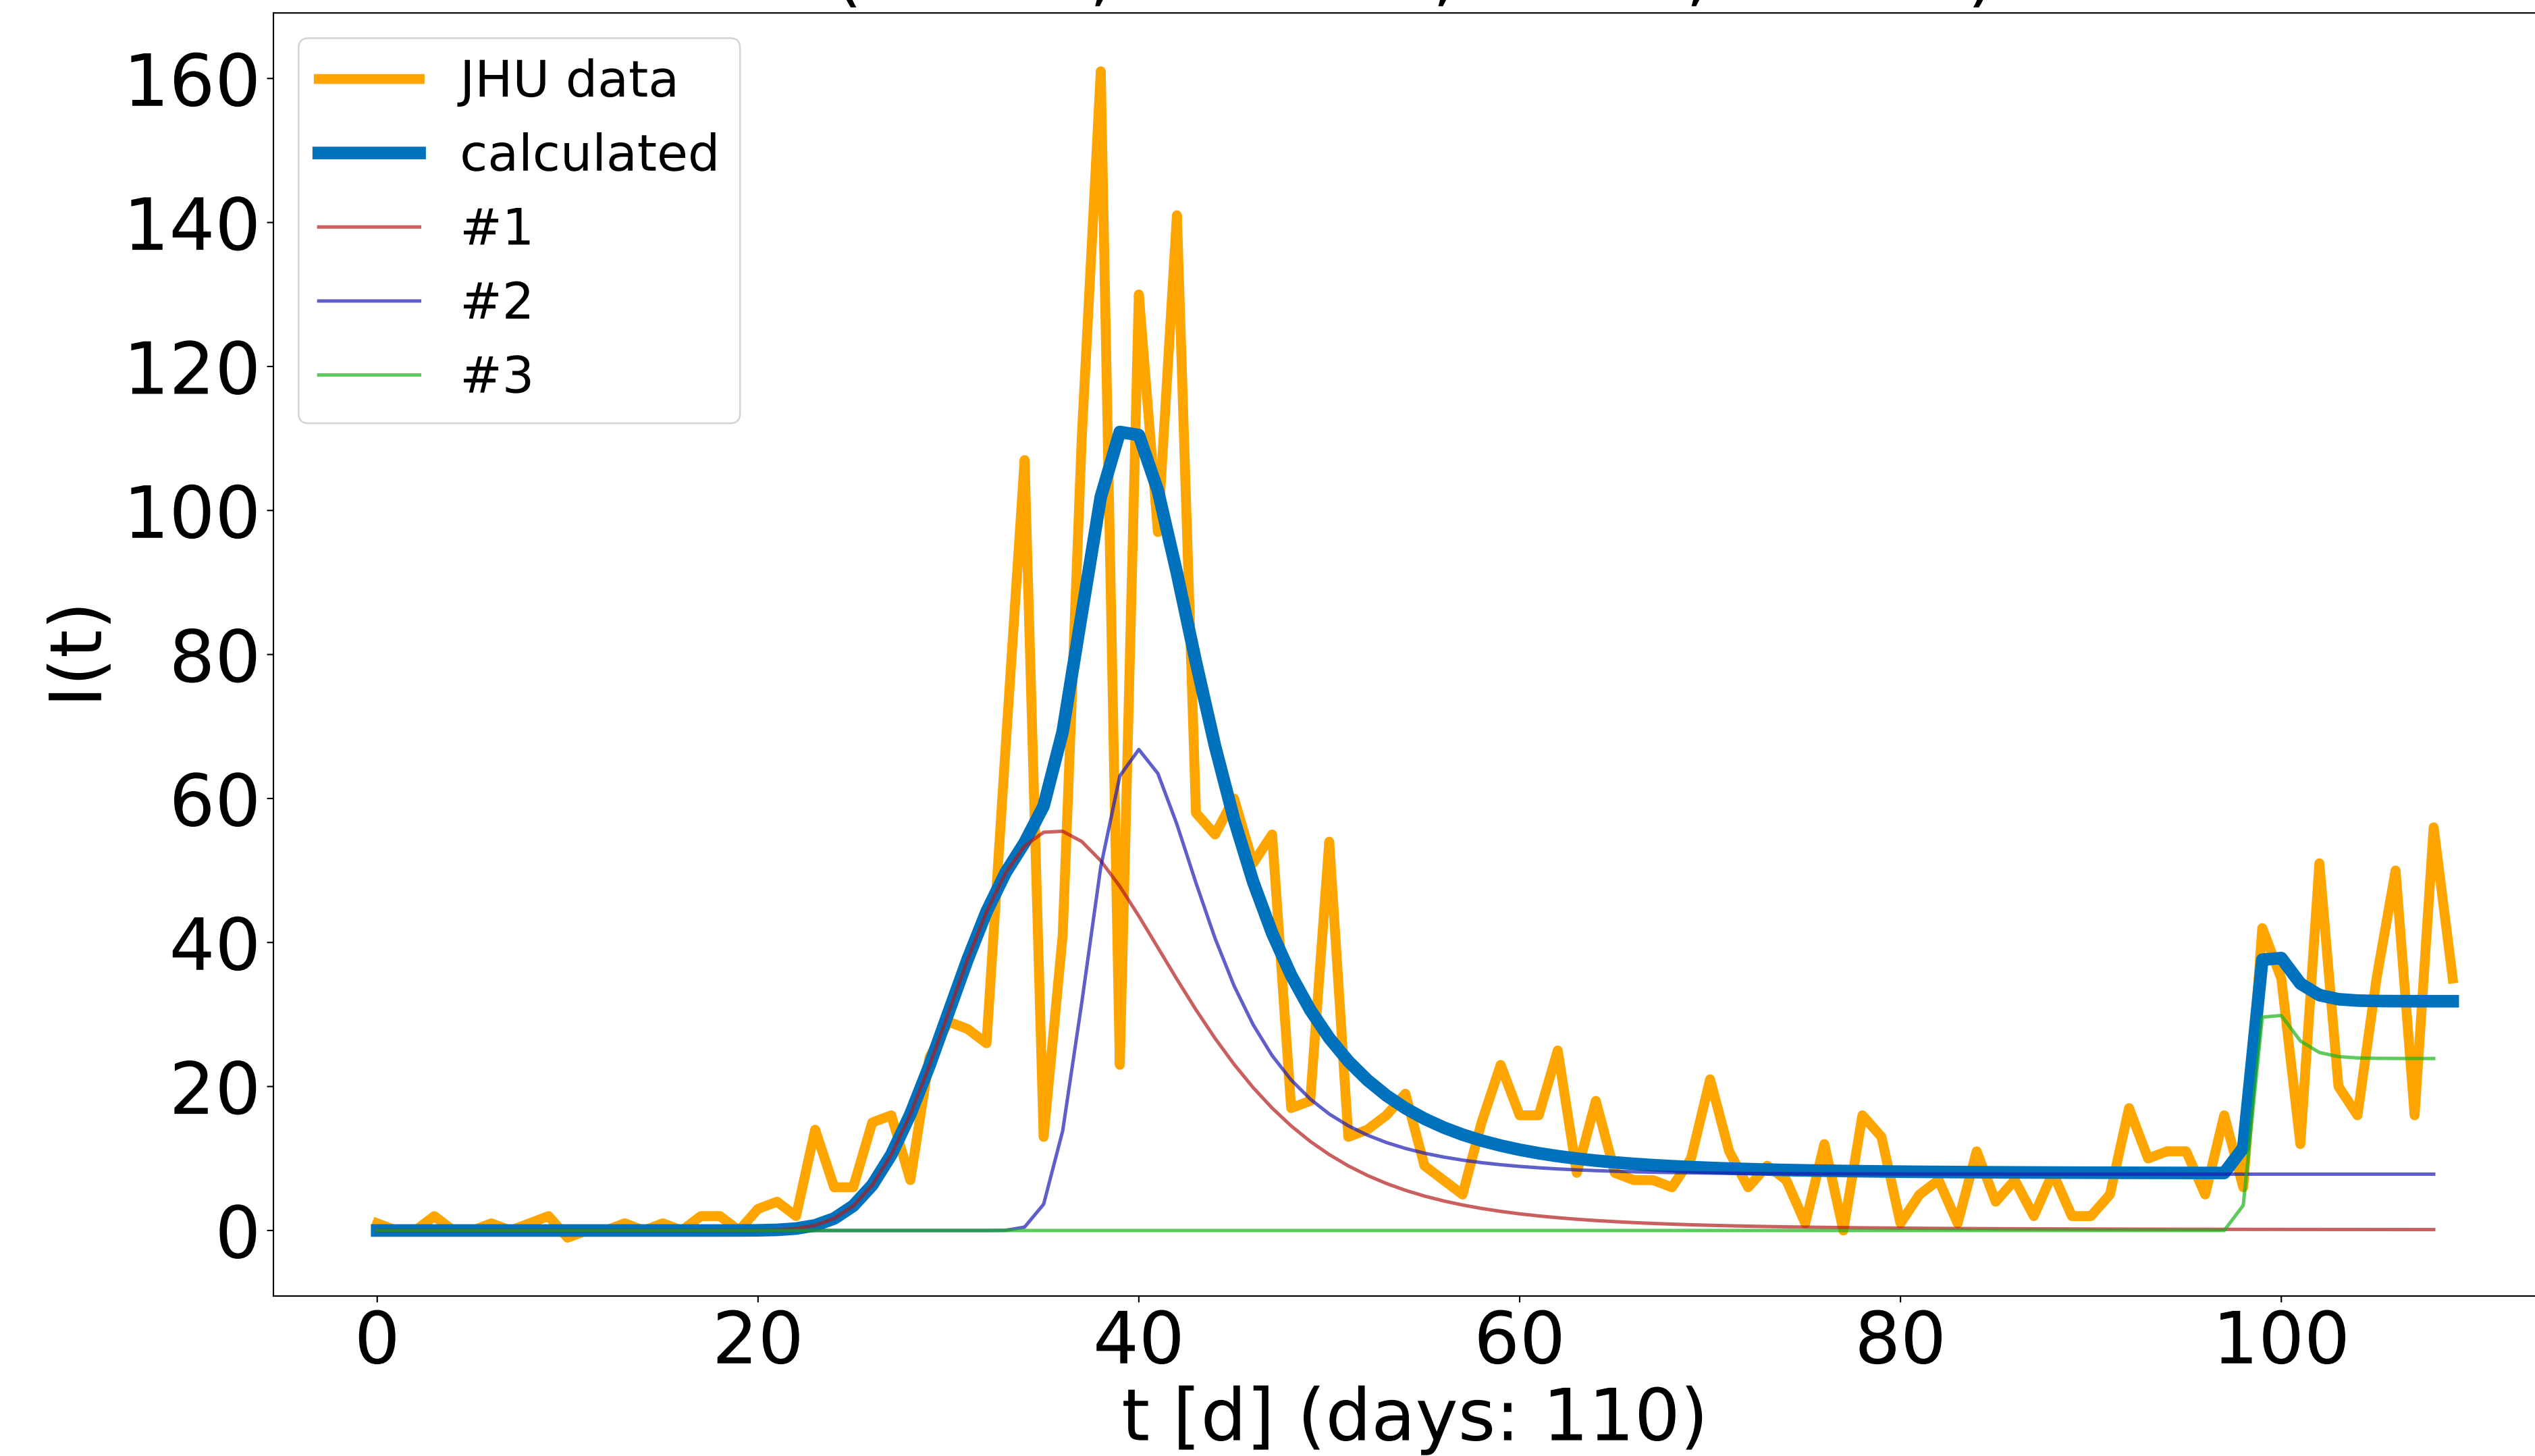

Black Hawk, Iowa, US, Black Hawk ( $R^2 = 0.985$ )

(i: 6.2, a: 0.515, b: 0.101, t: 24.6)

(i: 0.1, a: 1.698, b: 0.097, t: 29.5)

(i: 33.9, a: 0.001, b: 0.162, t: 121.0)

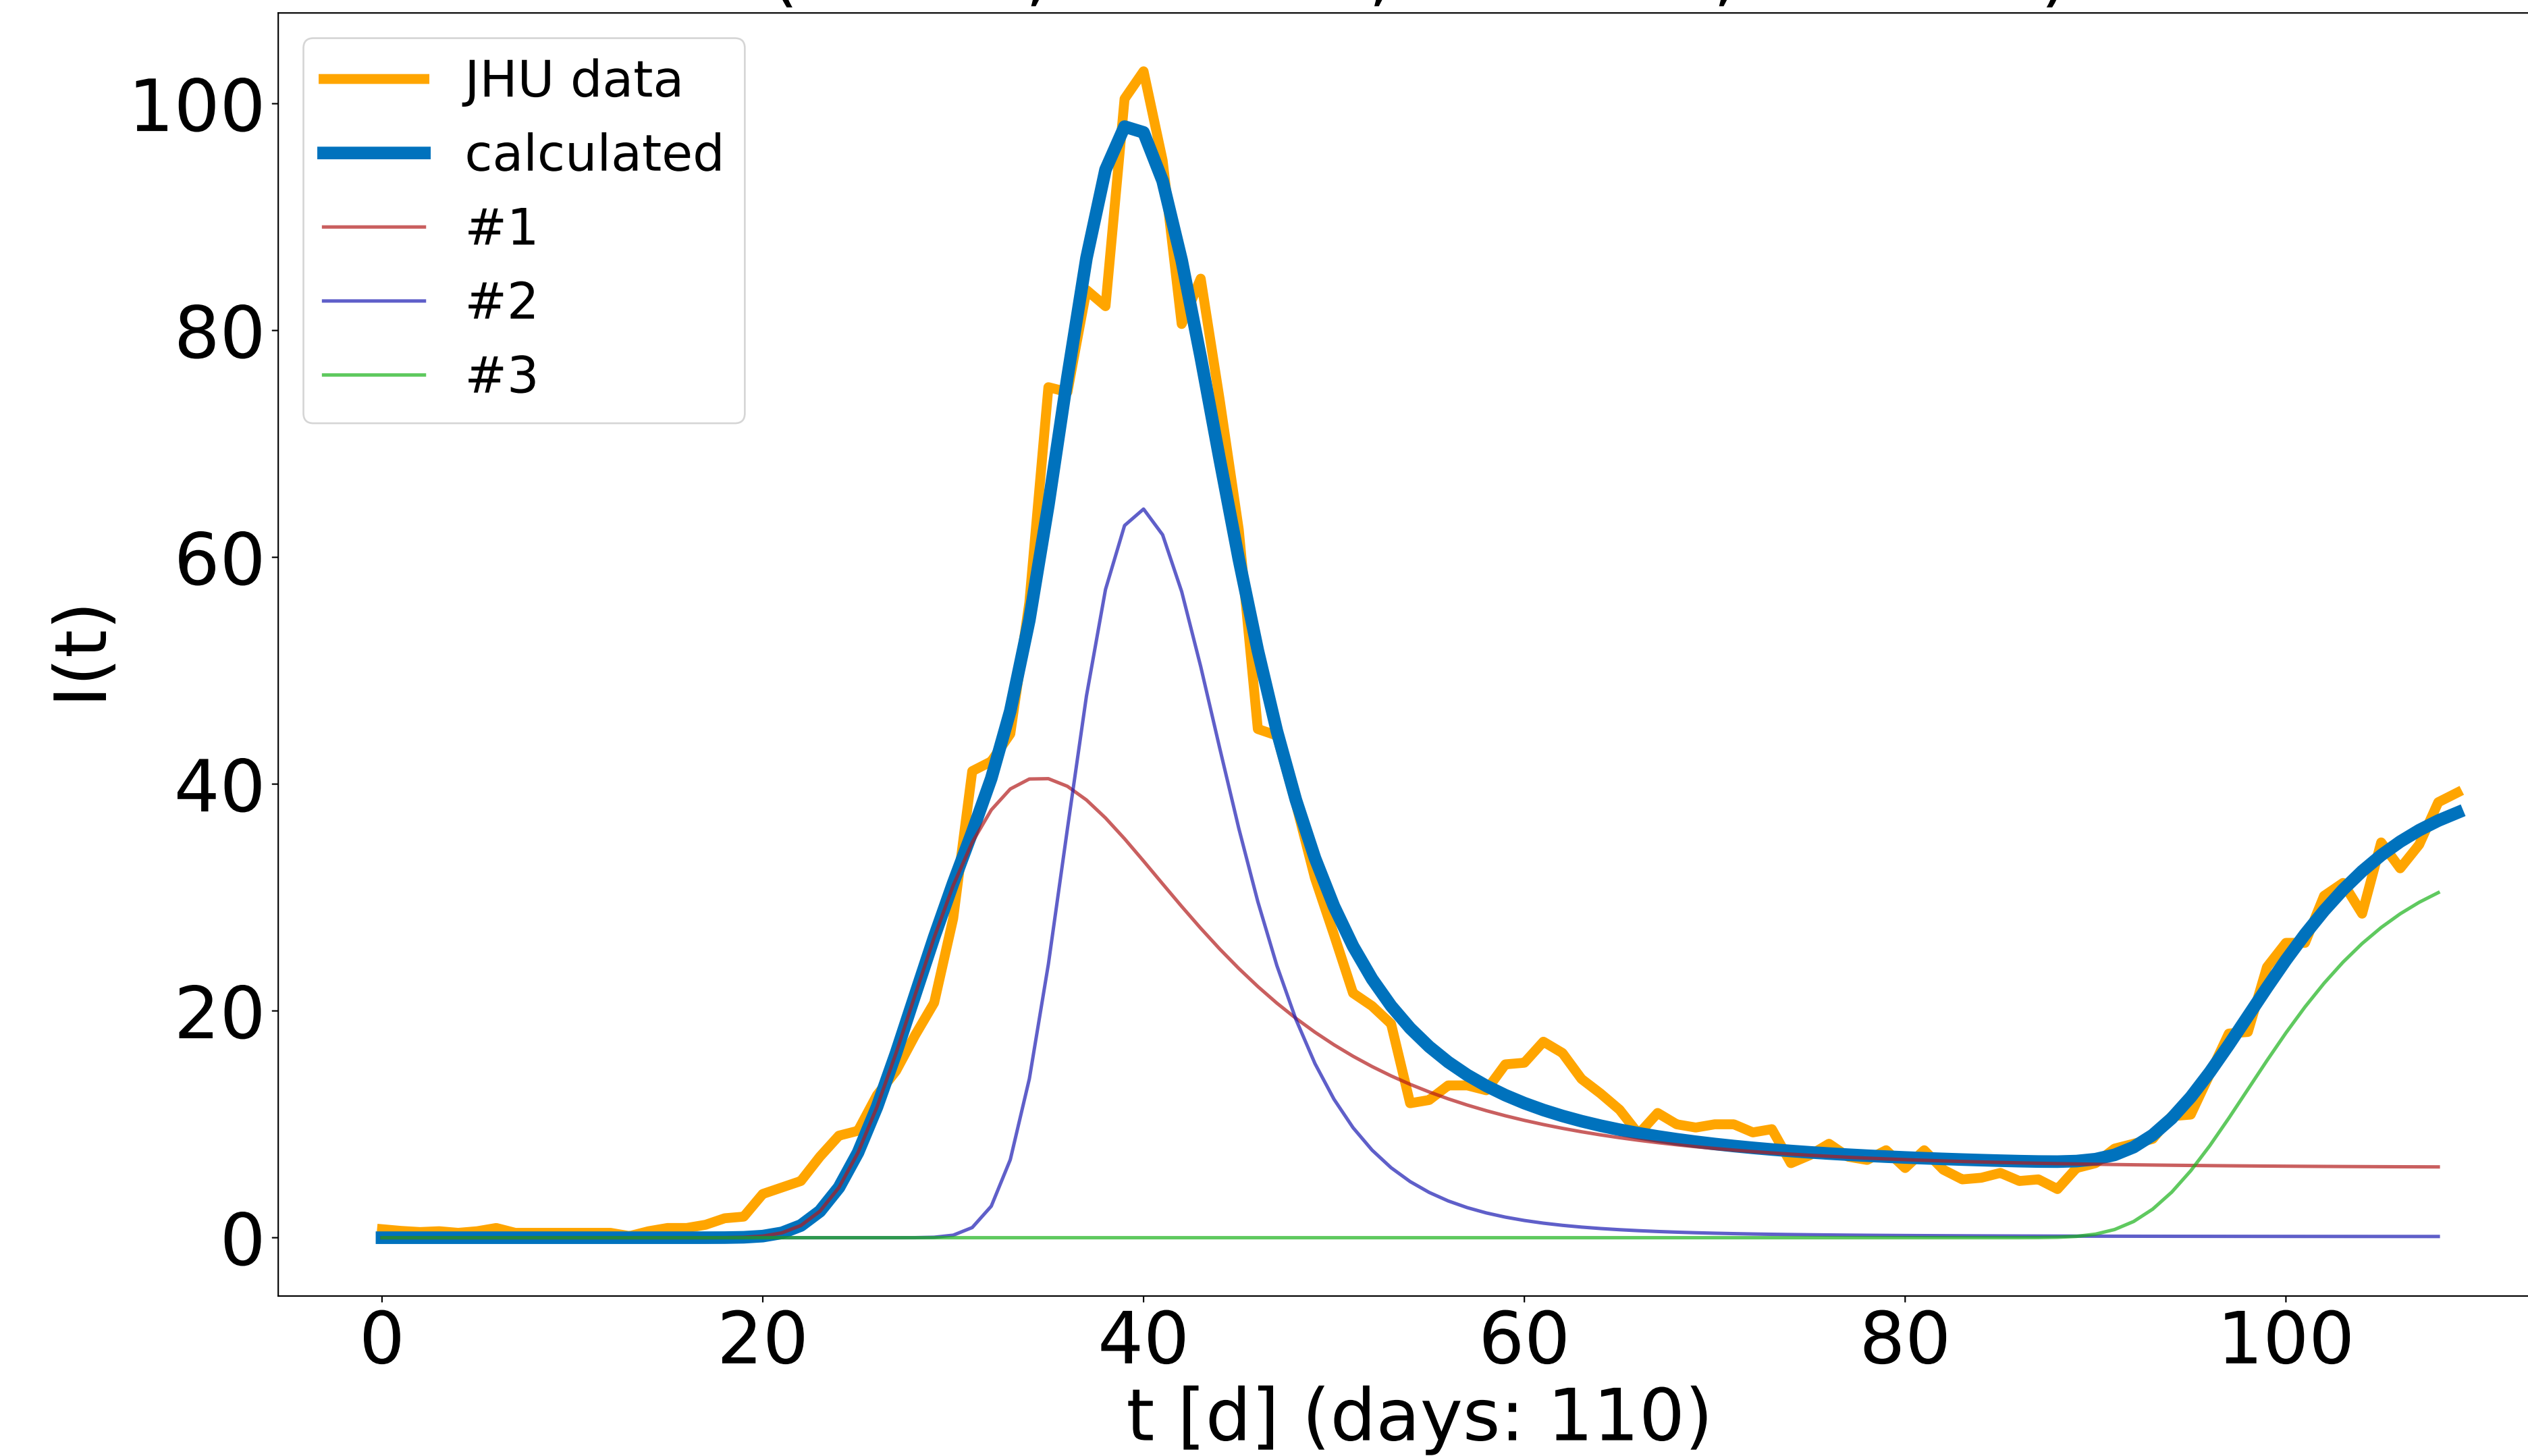

Crawford, Iowa, US, Crawford ( $R^2 = 0.566$ )  
(i: 0.1, a: 1.847, b: 0.127, t: 28.7)  
(i: 6.1, a: 2.0, b: 0.392, t: 42.9)  
(i: 3.9, a: 0.49, b: 1.086, t: 100.1)

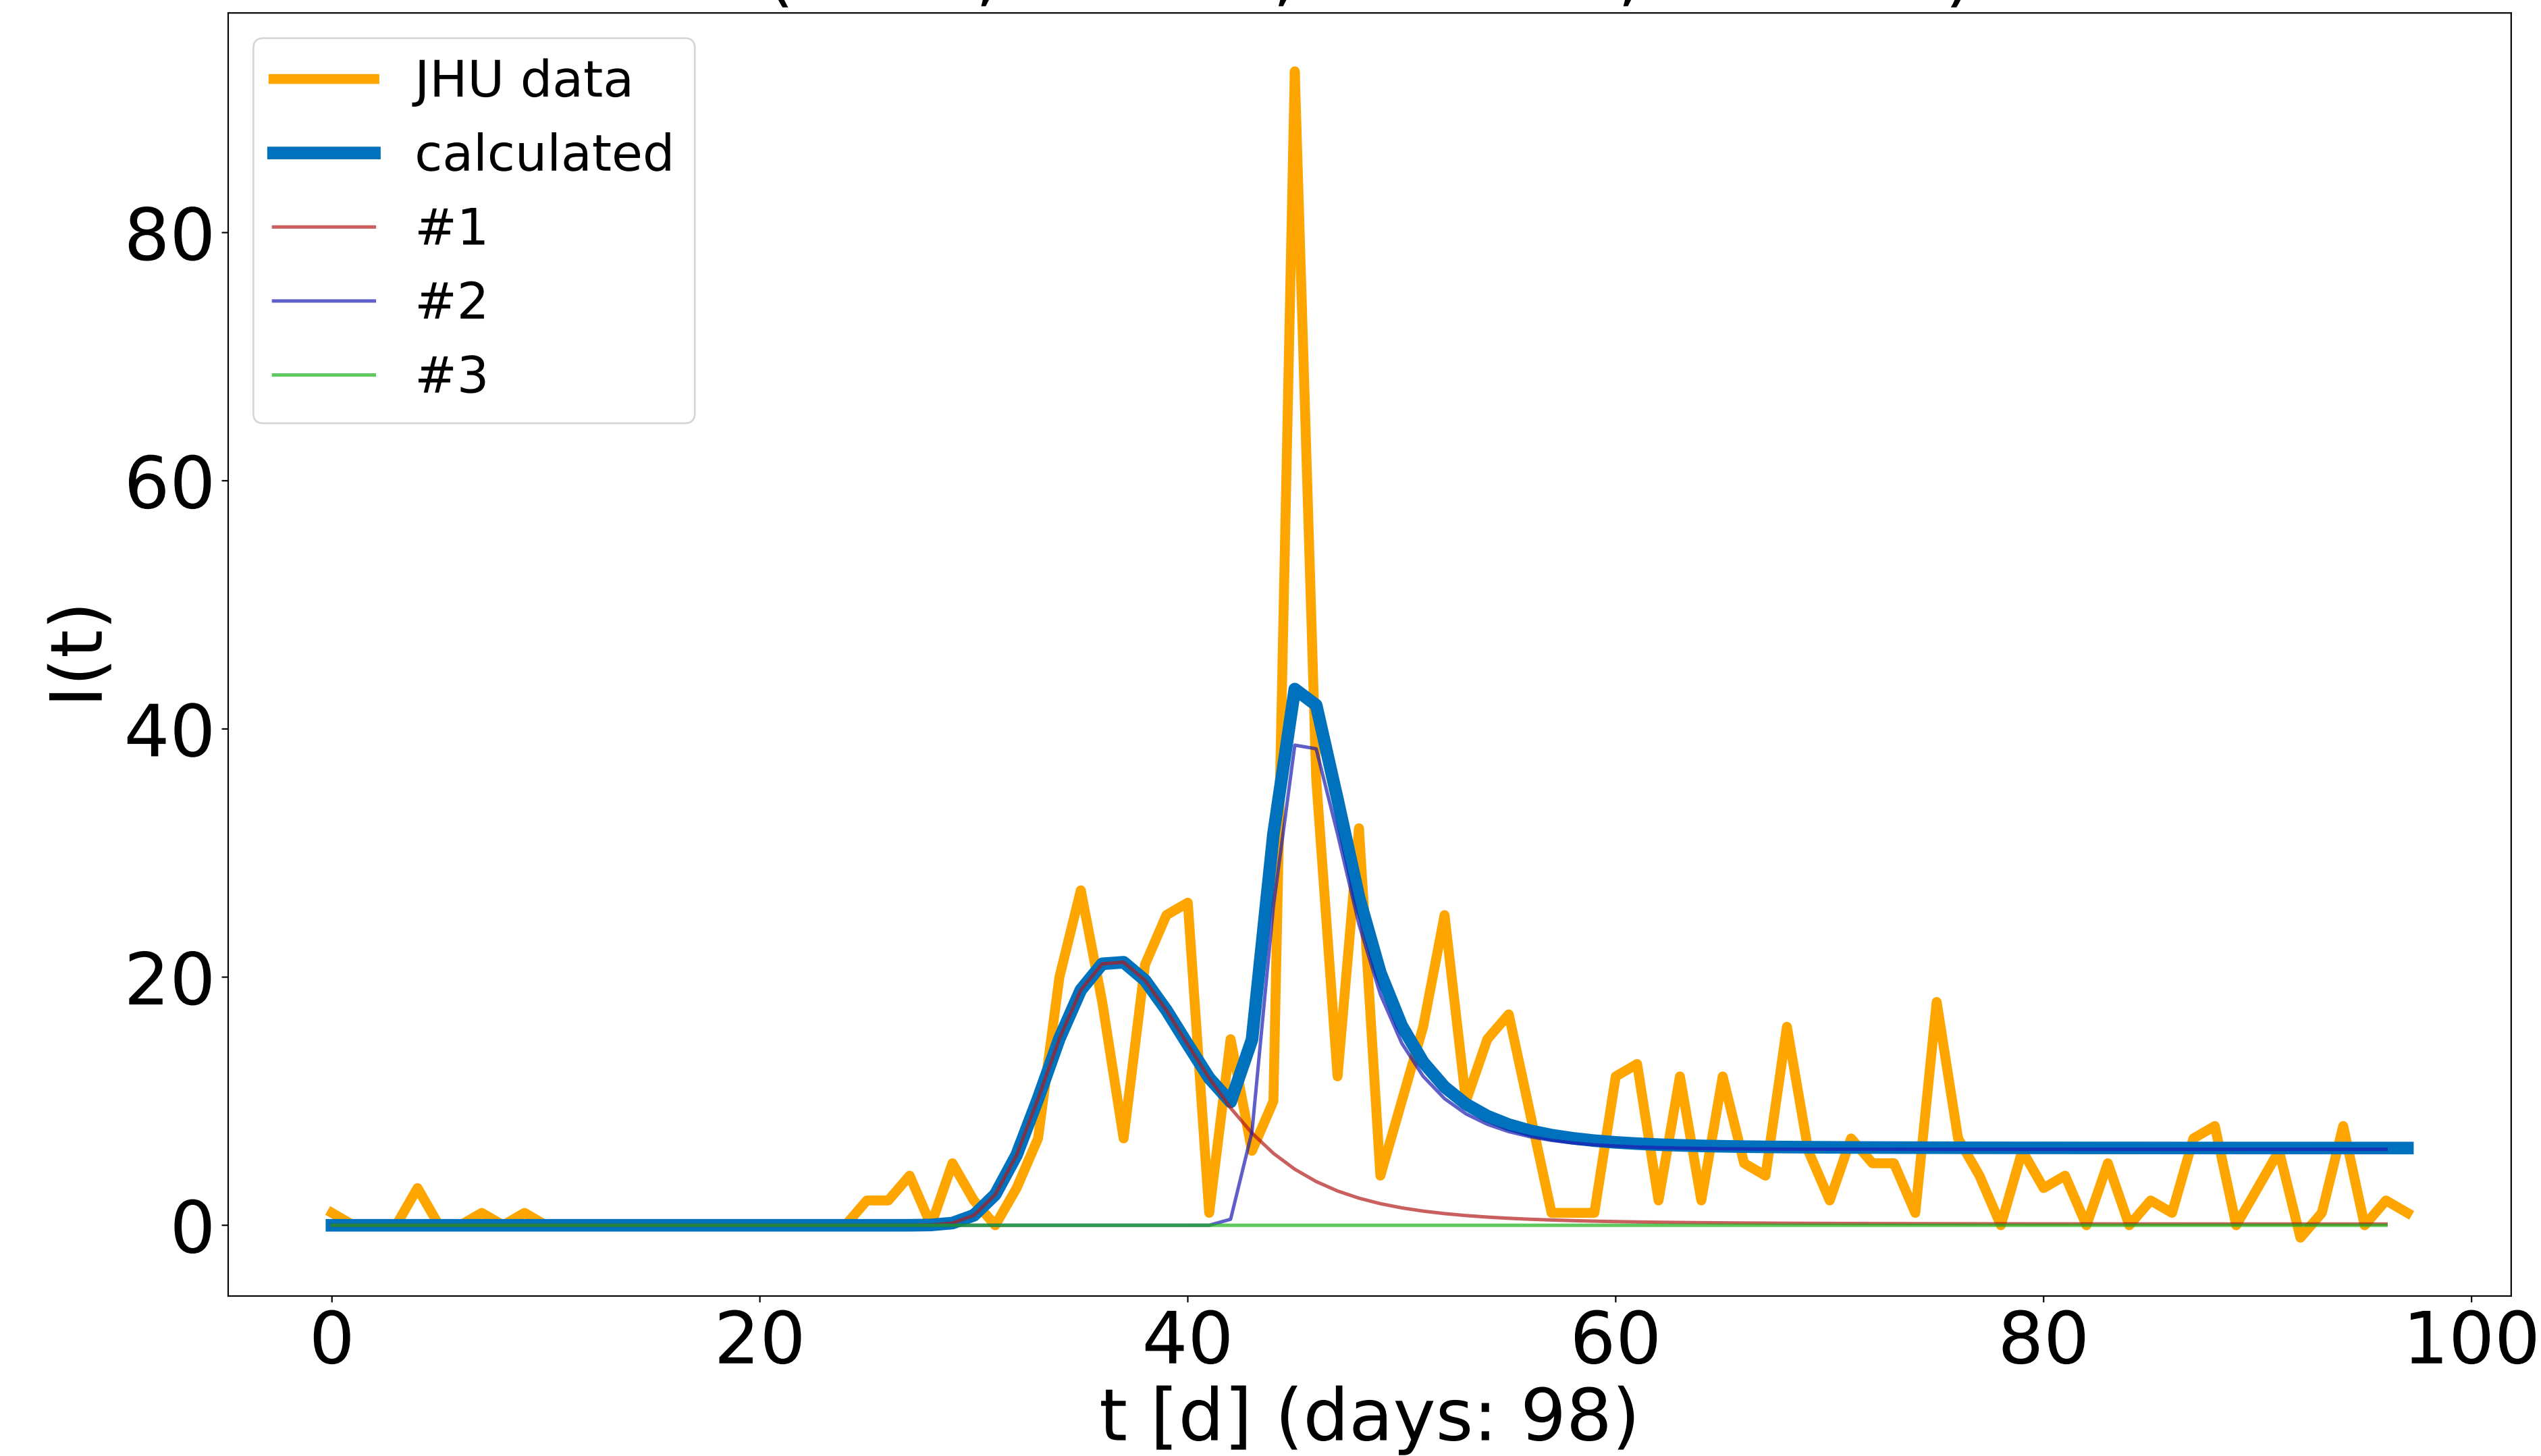

Crawford, Iowa, US, Crawford ( $R^2 = 0.972$ )  
(i: 0.1, a: 0.275, b: 0.024, t: 13.4)  
(i: 0.1, a: 1.605, b: 0.12, t: 28.1)  
(i: 0.1, a: 1.939, b: 0.134, t: 38.1)

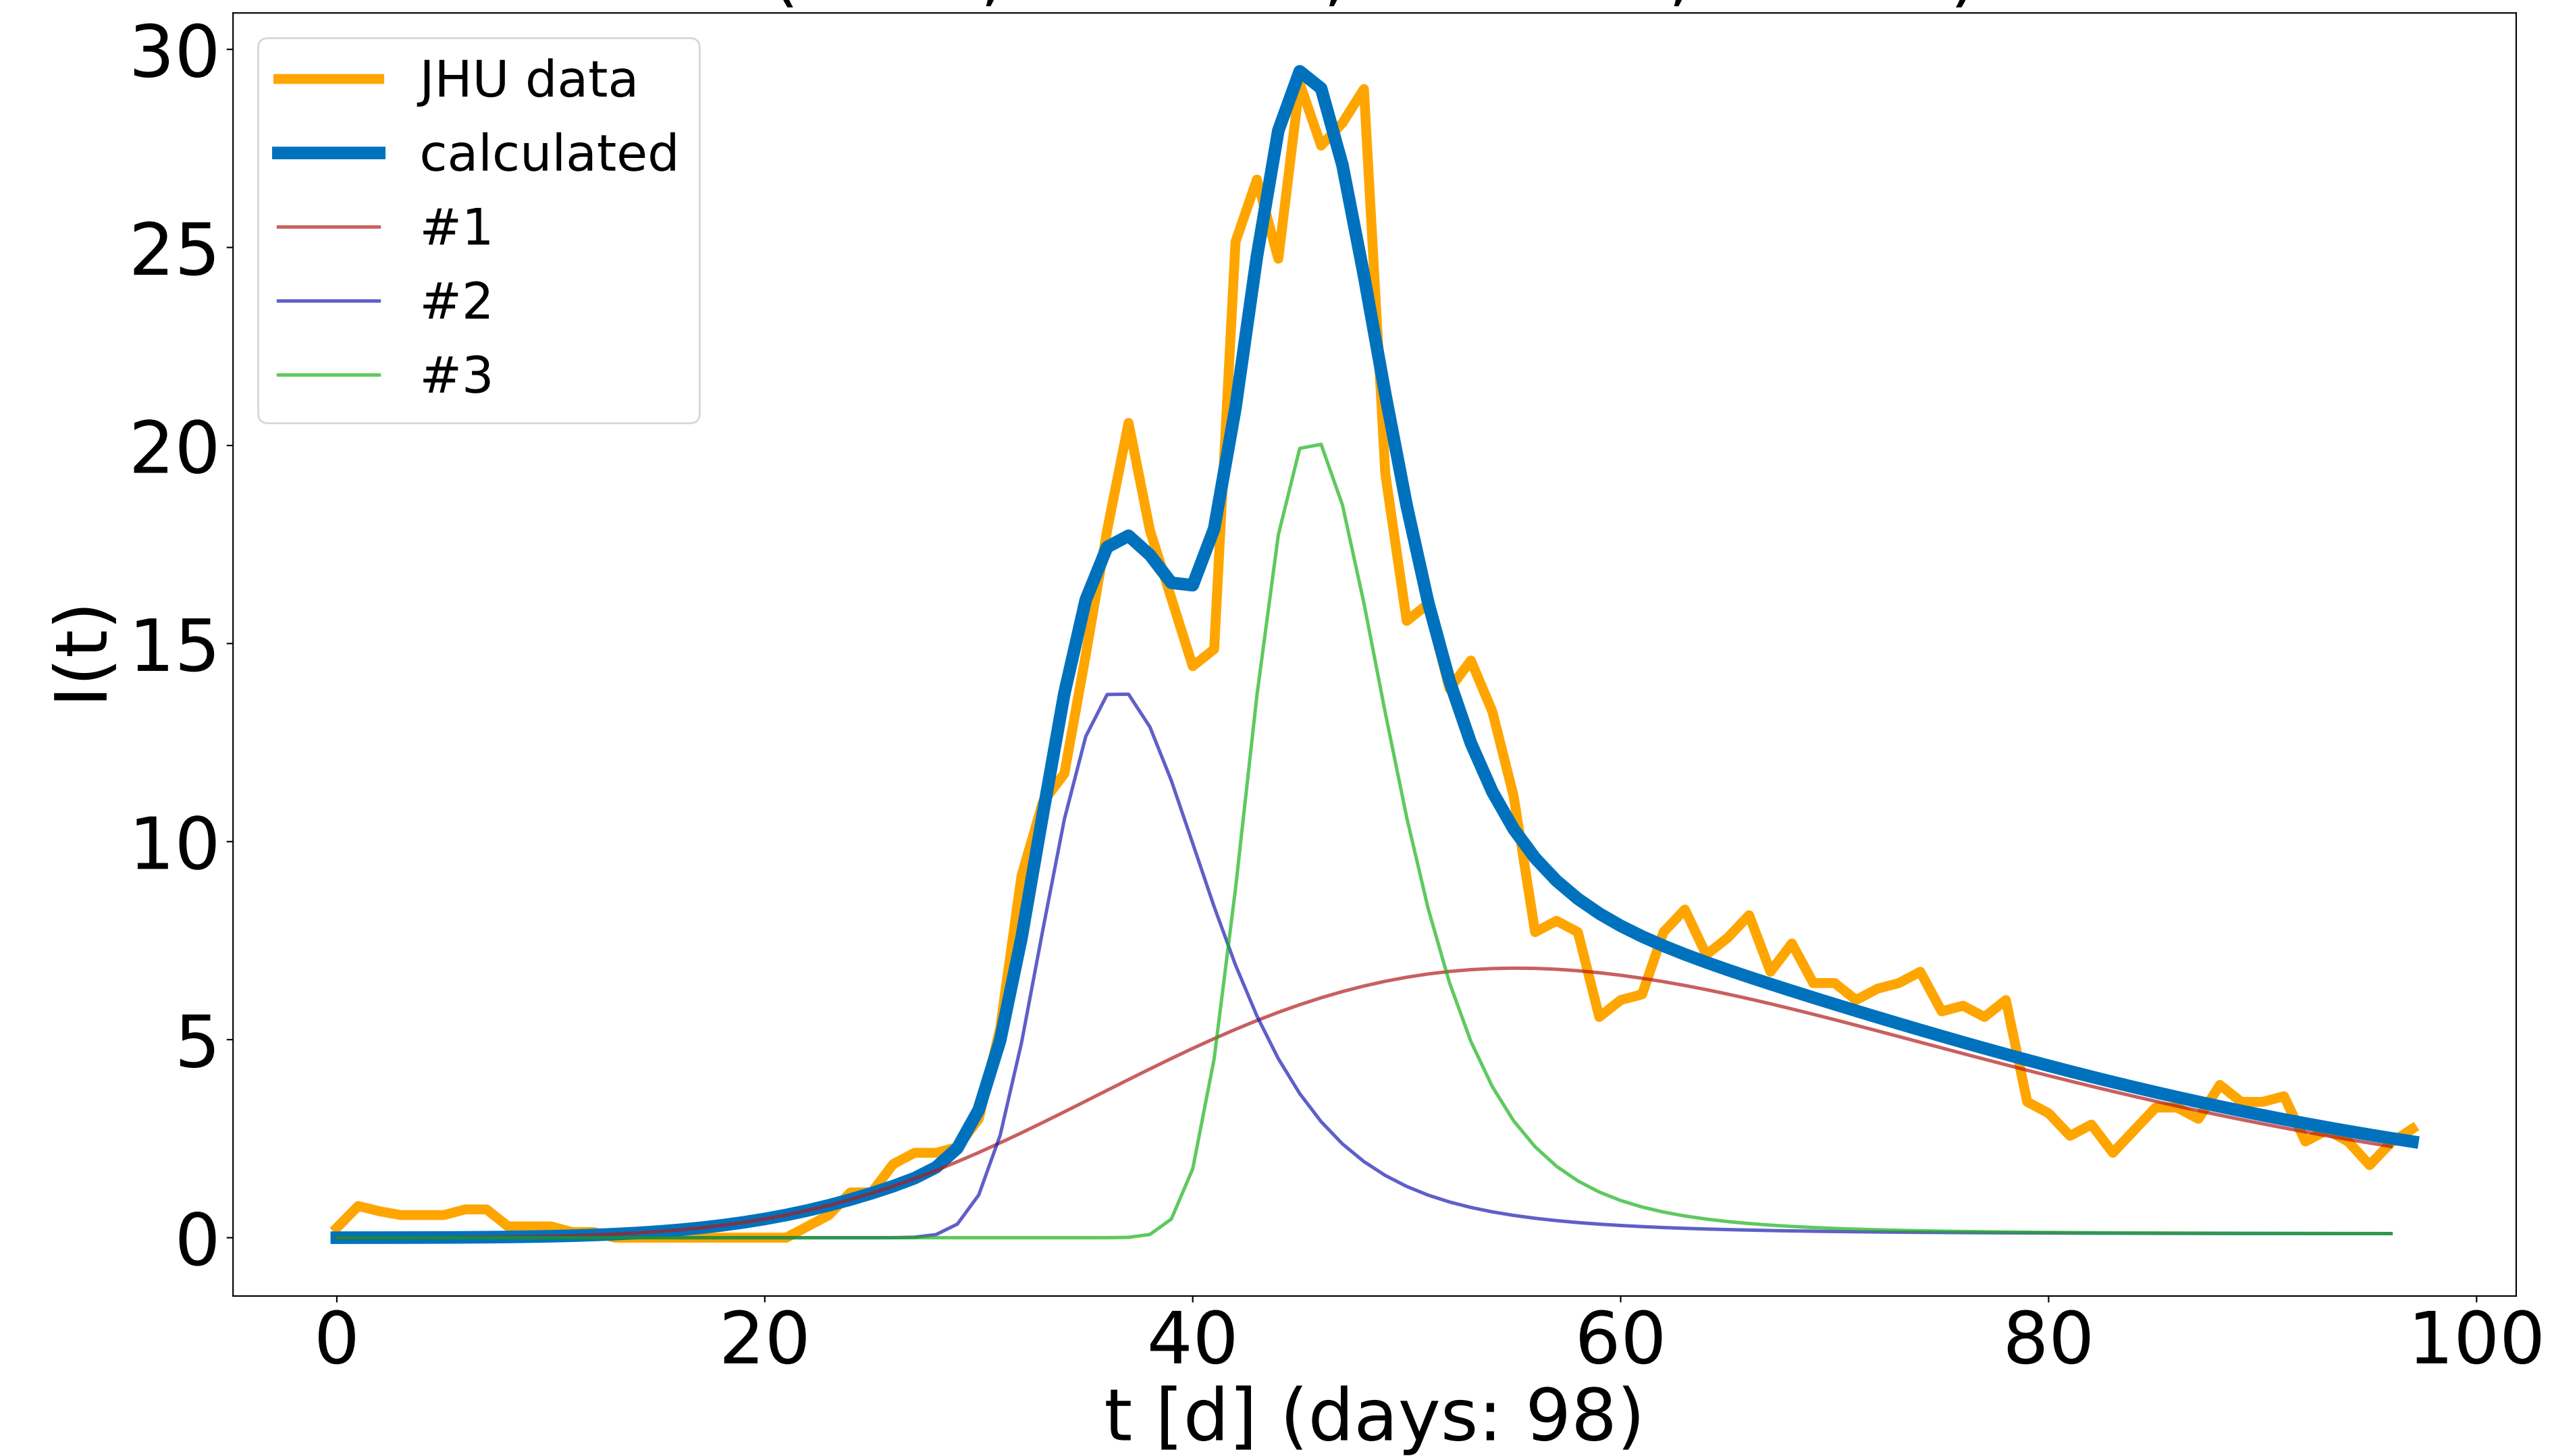

Polk, Iowa, US, Polk ( $R^2 = 0.668$ )  
(i: 1.3, a: 0.427, b: 0.077, t: 4.4)  
(i: 11.5, a: 0.313, b: 0.067, t: 30.0)  
(i: 52.6, a: 2.0, b: 0.868, t: 45.3)

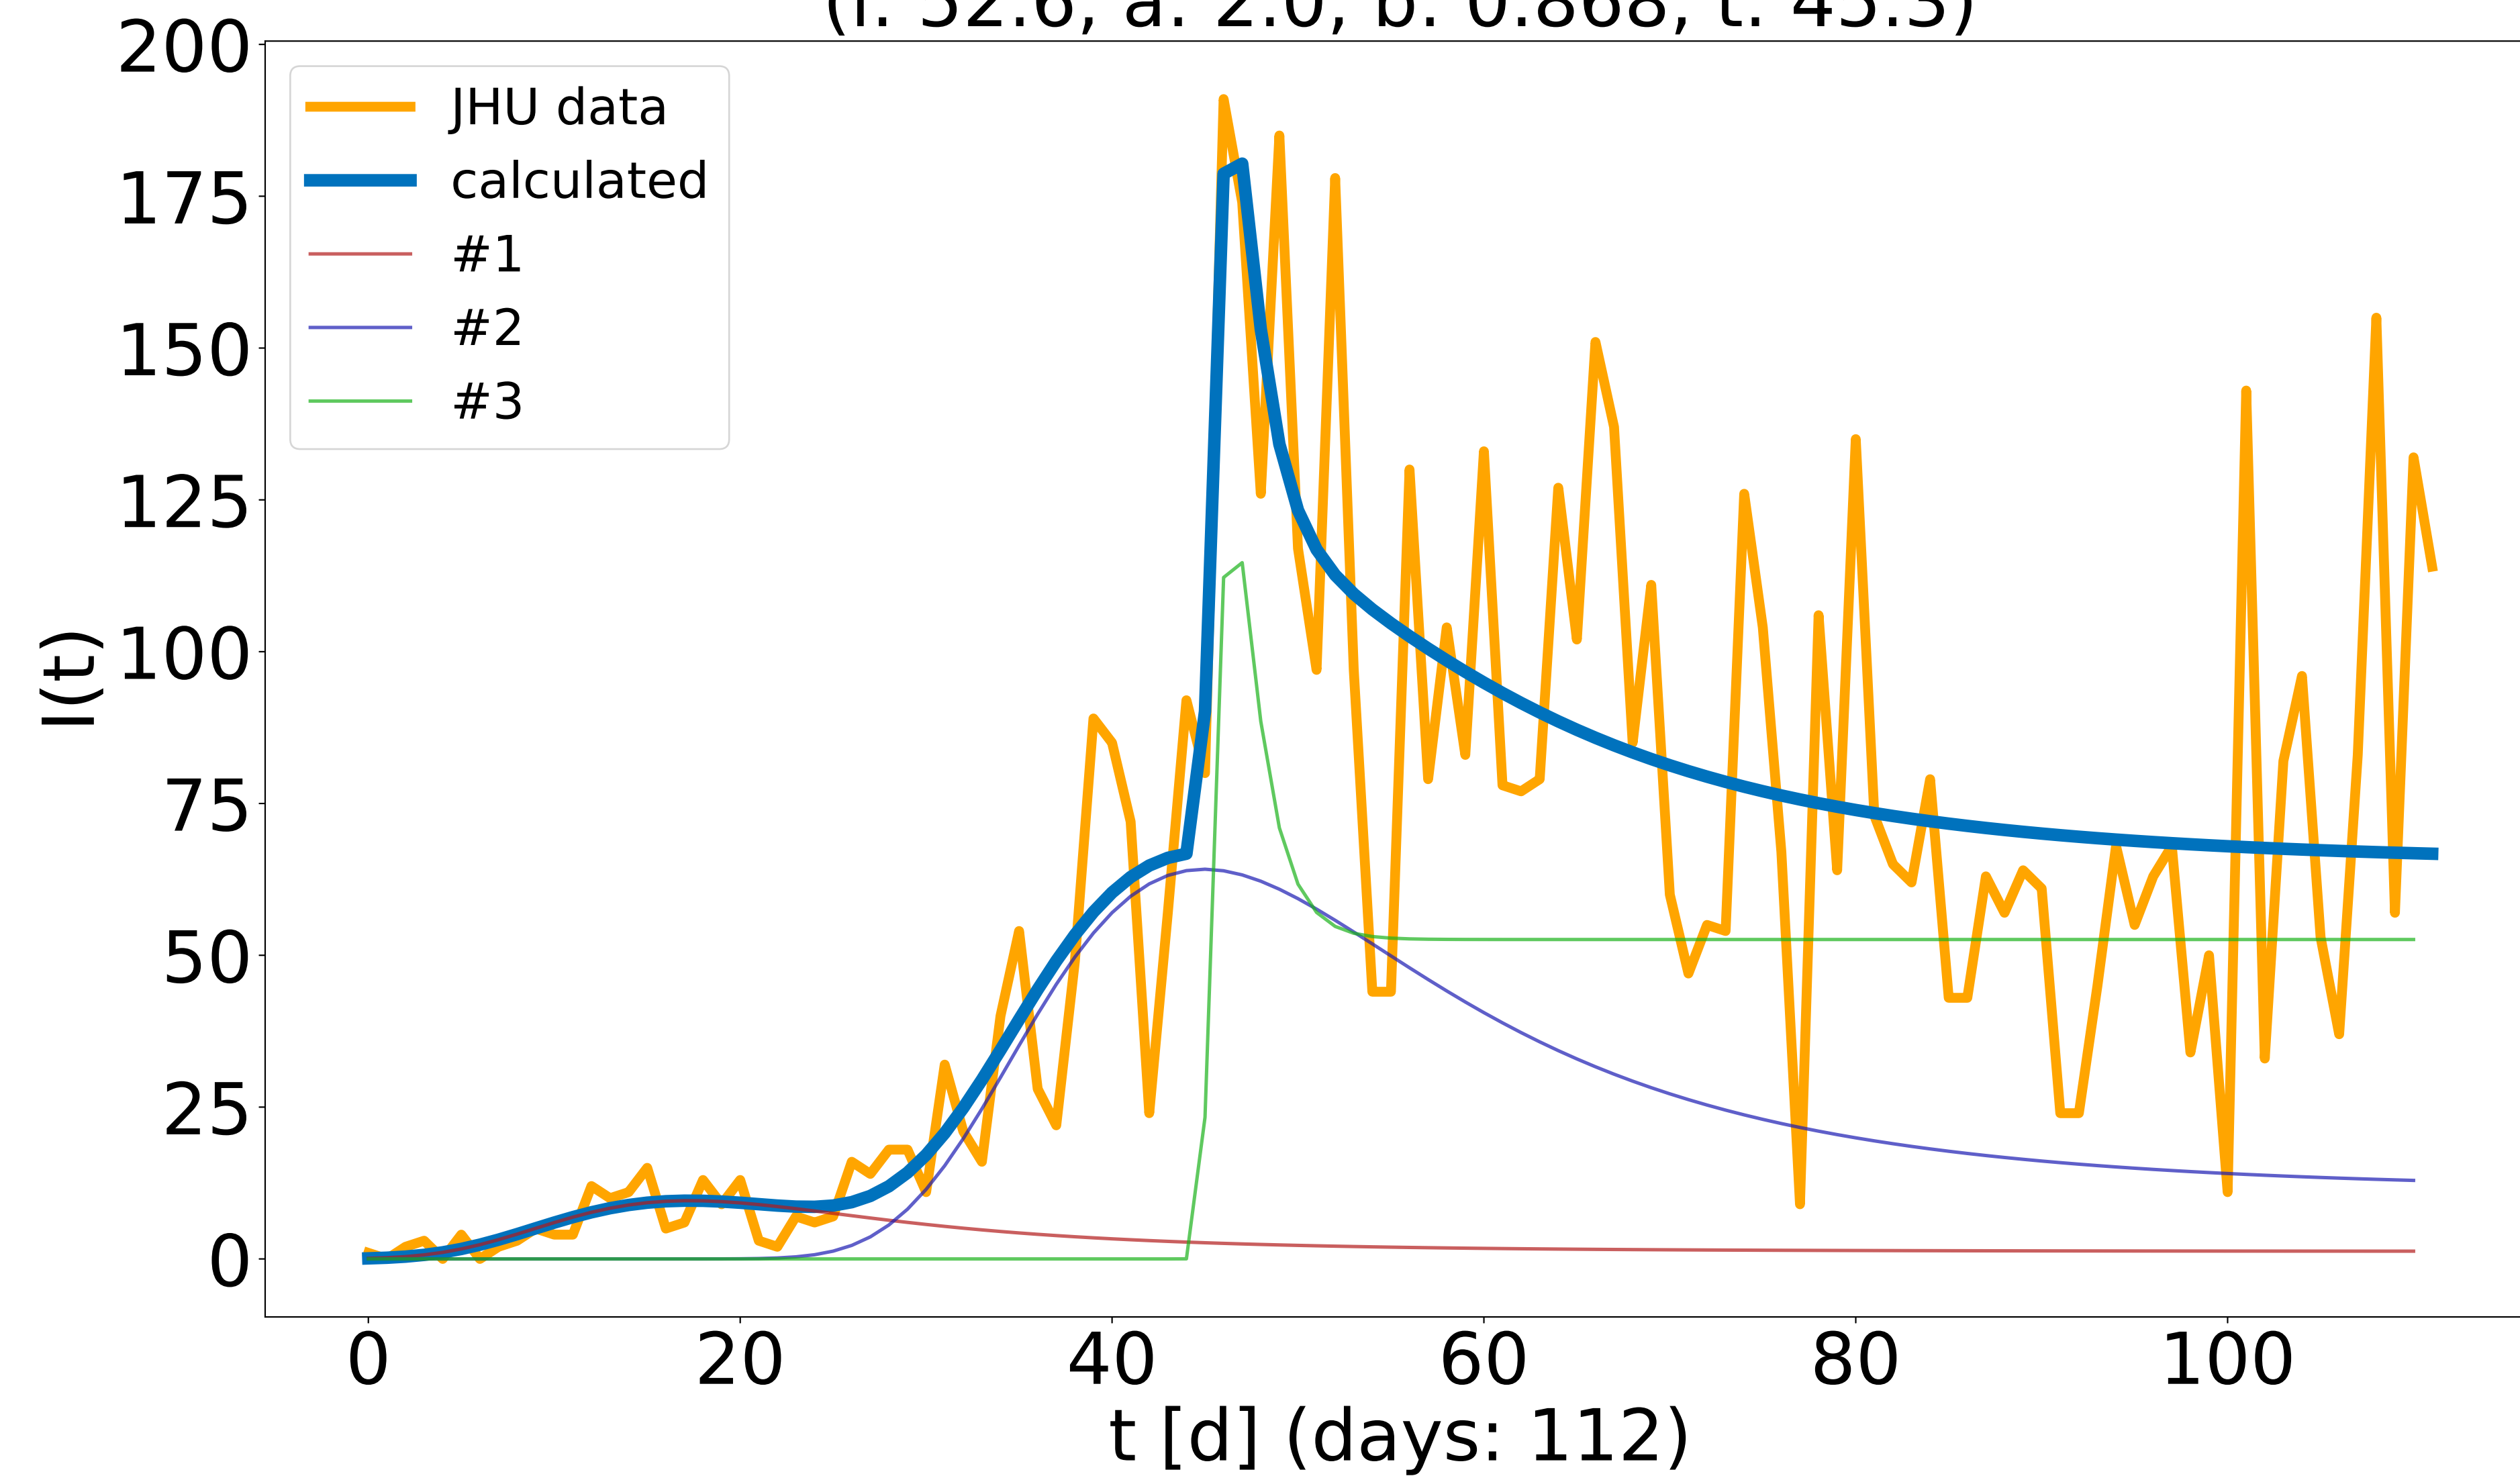

Polk, Iowa, US, Polk ( $R^2 = 0.972$ )  
(i: 0.1, a: 0.315, b: 0.017, t: 2.1)  
(i: 0.4, a: 2.0, b: 0.147, t: 40.3)  
(i: 199.7, a: 0.005, b: 0.06, t: 140.0)

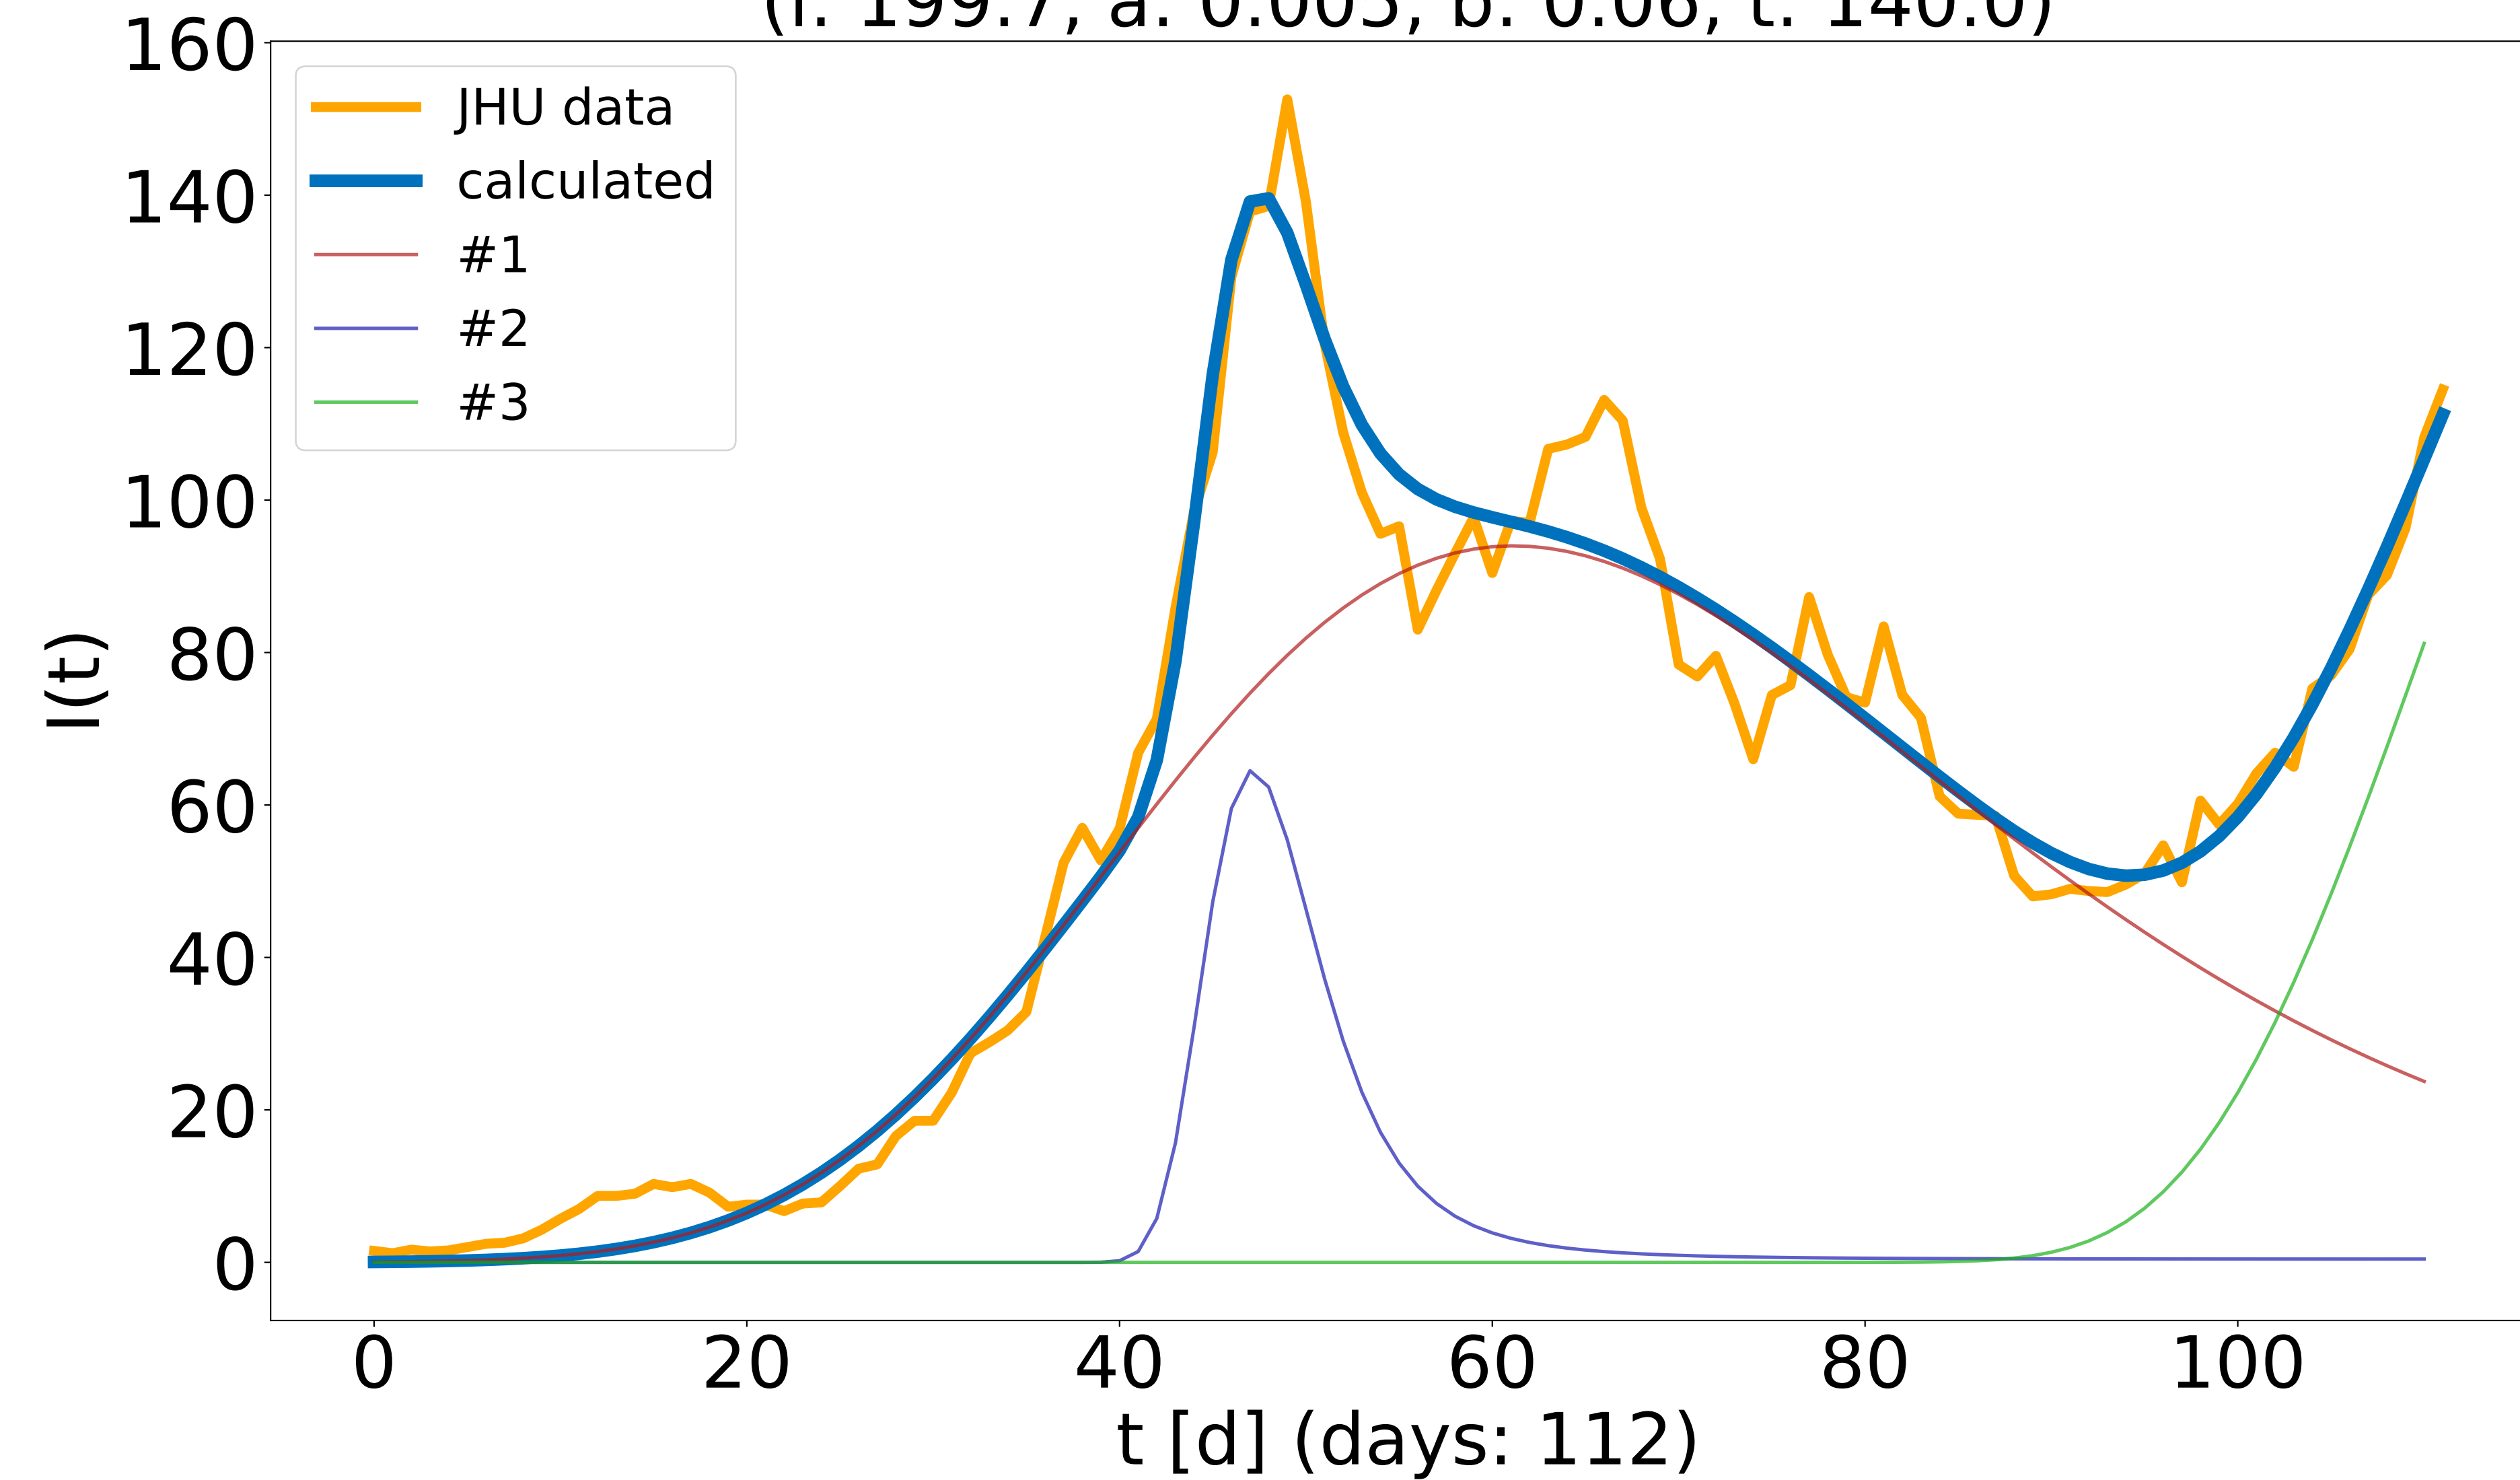



Woodbury, Iowa, US, Woodbury ( $R^2 = 0.539$ )  
(i: 0.9, a: 0.936, b: 0.071, t: 24.5)  
(i: 17.7, a: 2.0, b: 0.446, t: 48.8)  
(i: 52.2, a: 1.735, b: 1.168, t: 105.6)

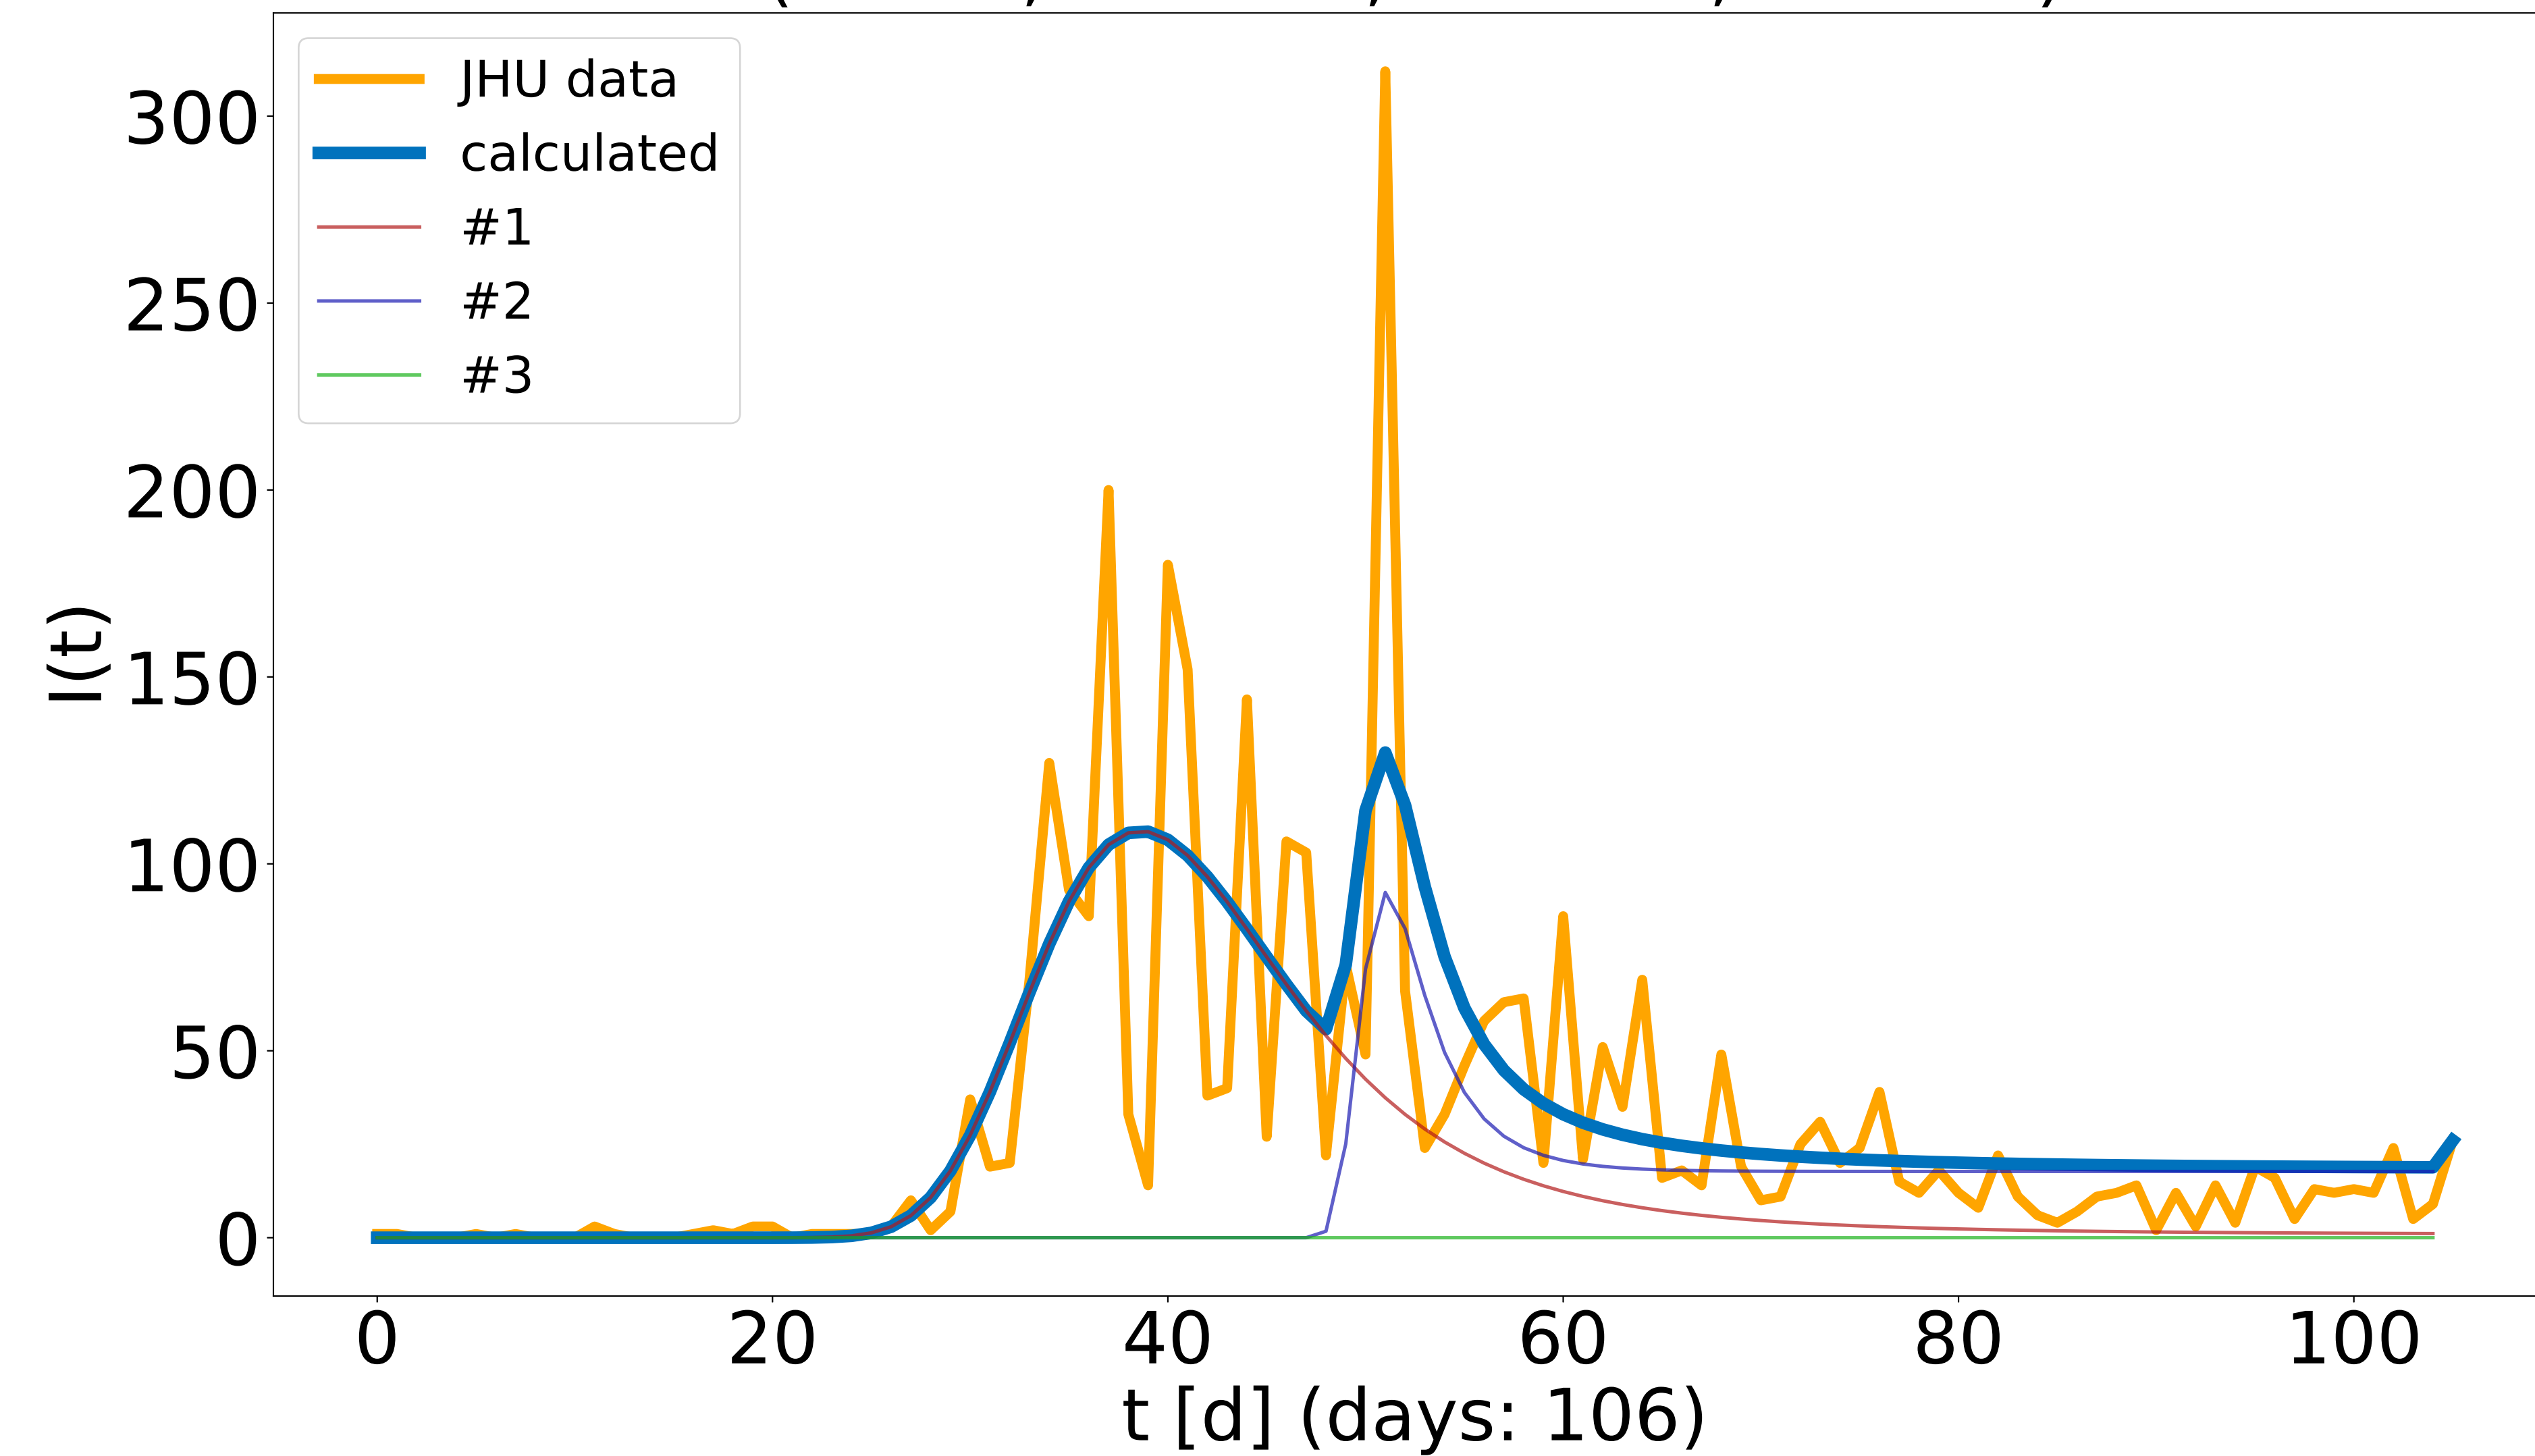

Woodbury, Iowa, US, Woodbury ( $R^2 = 0.976$ )  
(i: 3.4, a: 0.82, b: 0.089, t: 26.6)  
(i: 7.9, a: 0.679, b: 0.129, t: 43.8)  
(i: 4.3, a: 0.004, b: 0.629, t: 107.5)

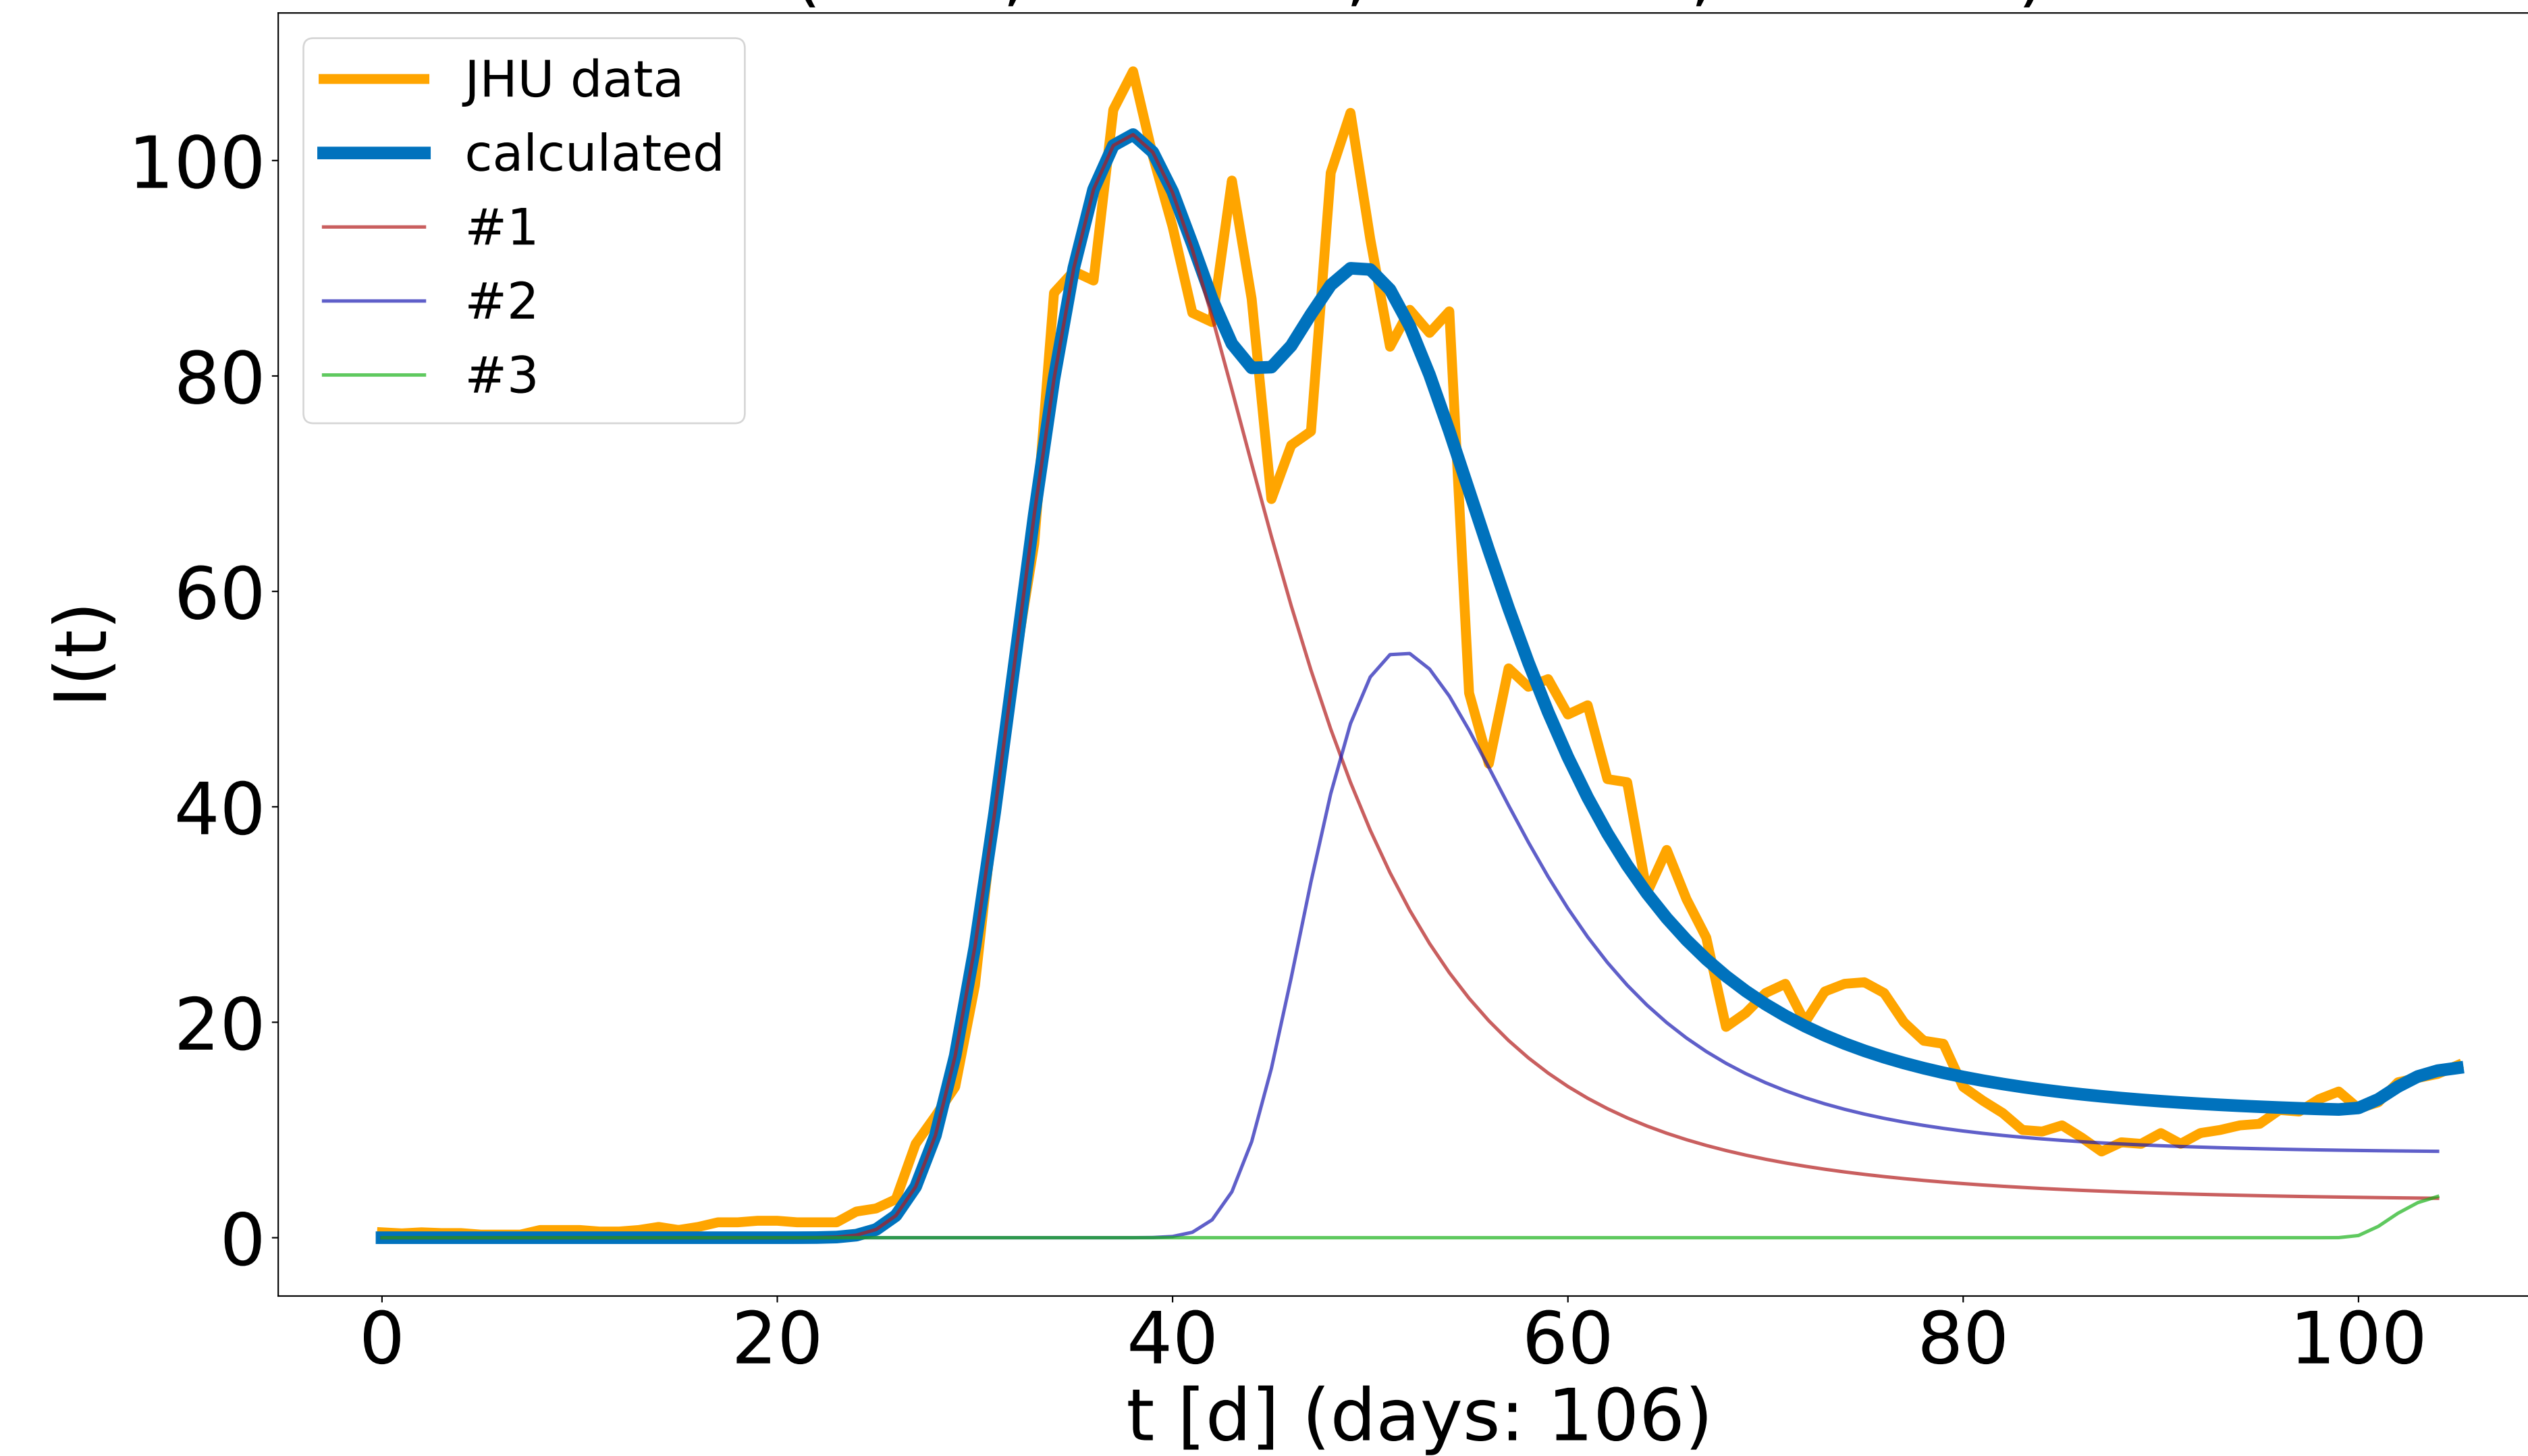

Finney, Kansas, US, Finney ( $R^2 = 0.52$ )  
(i: 0.1, a: 0.864, b: 0.05, t: 13.5)  
(i: 2.8, a: 2.0, b: 0.299, t: 41.2)  
(i: 6.3, a: 0.57, b: 1.208, t: 103.3)

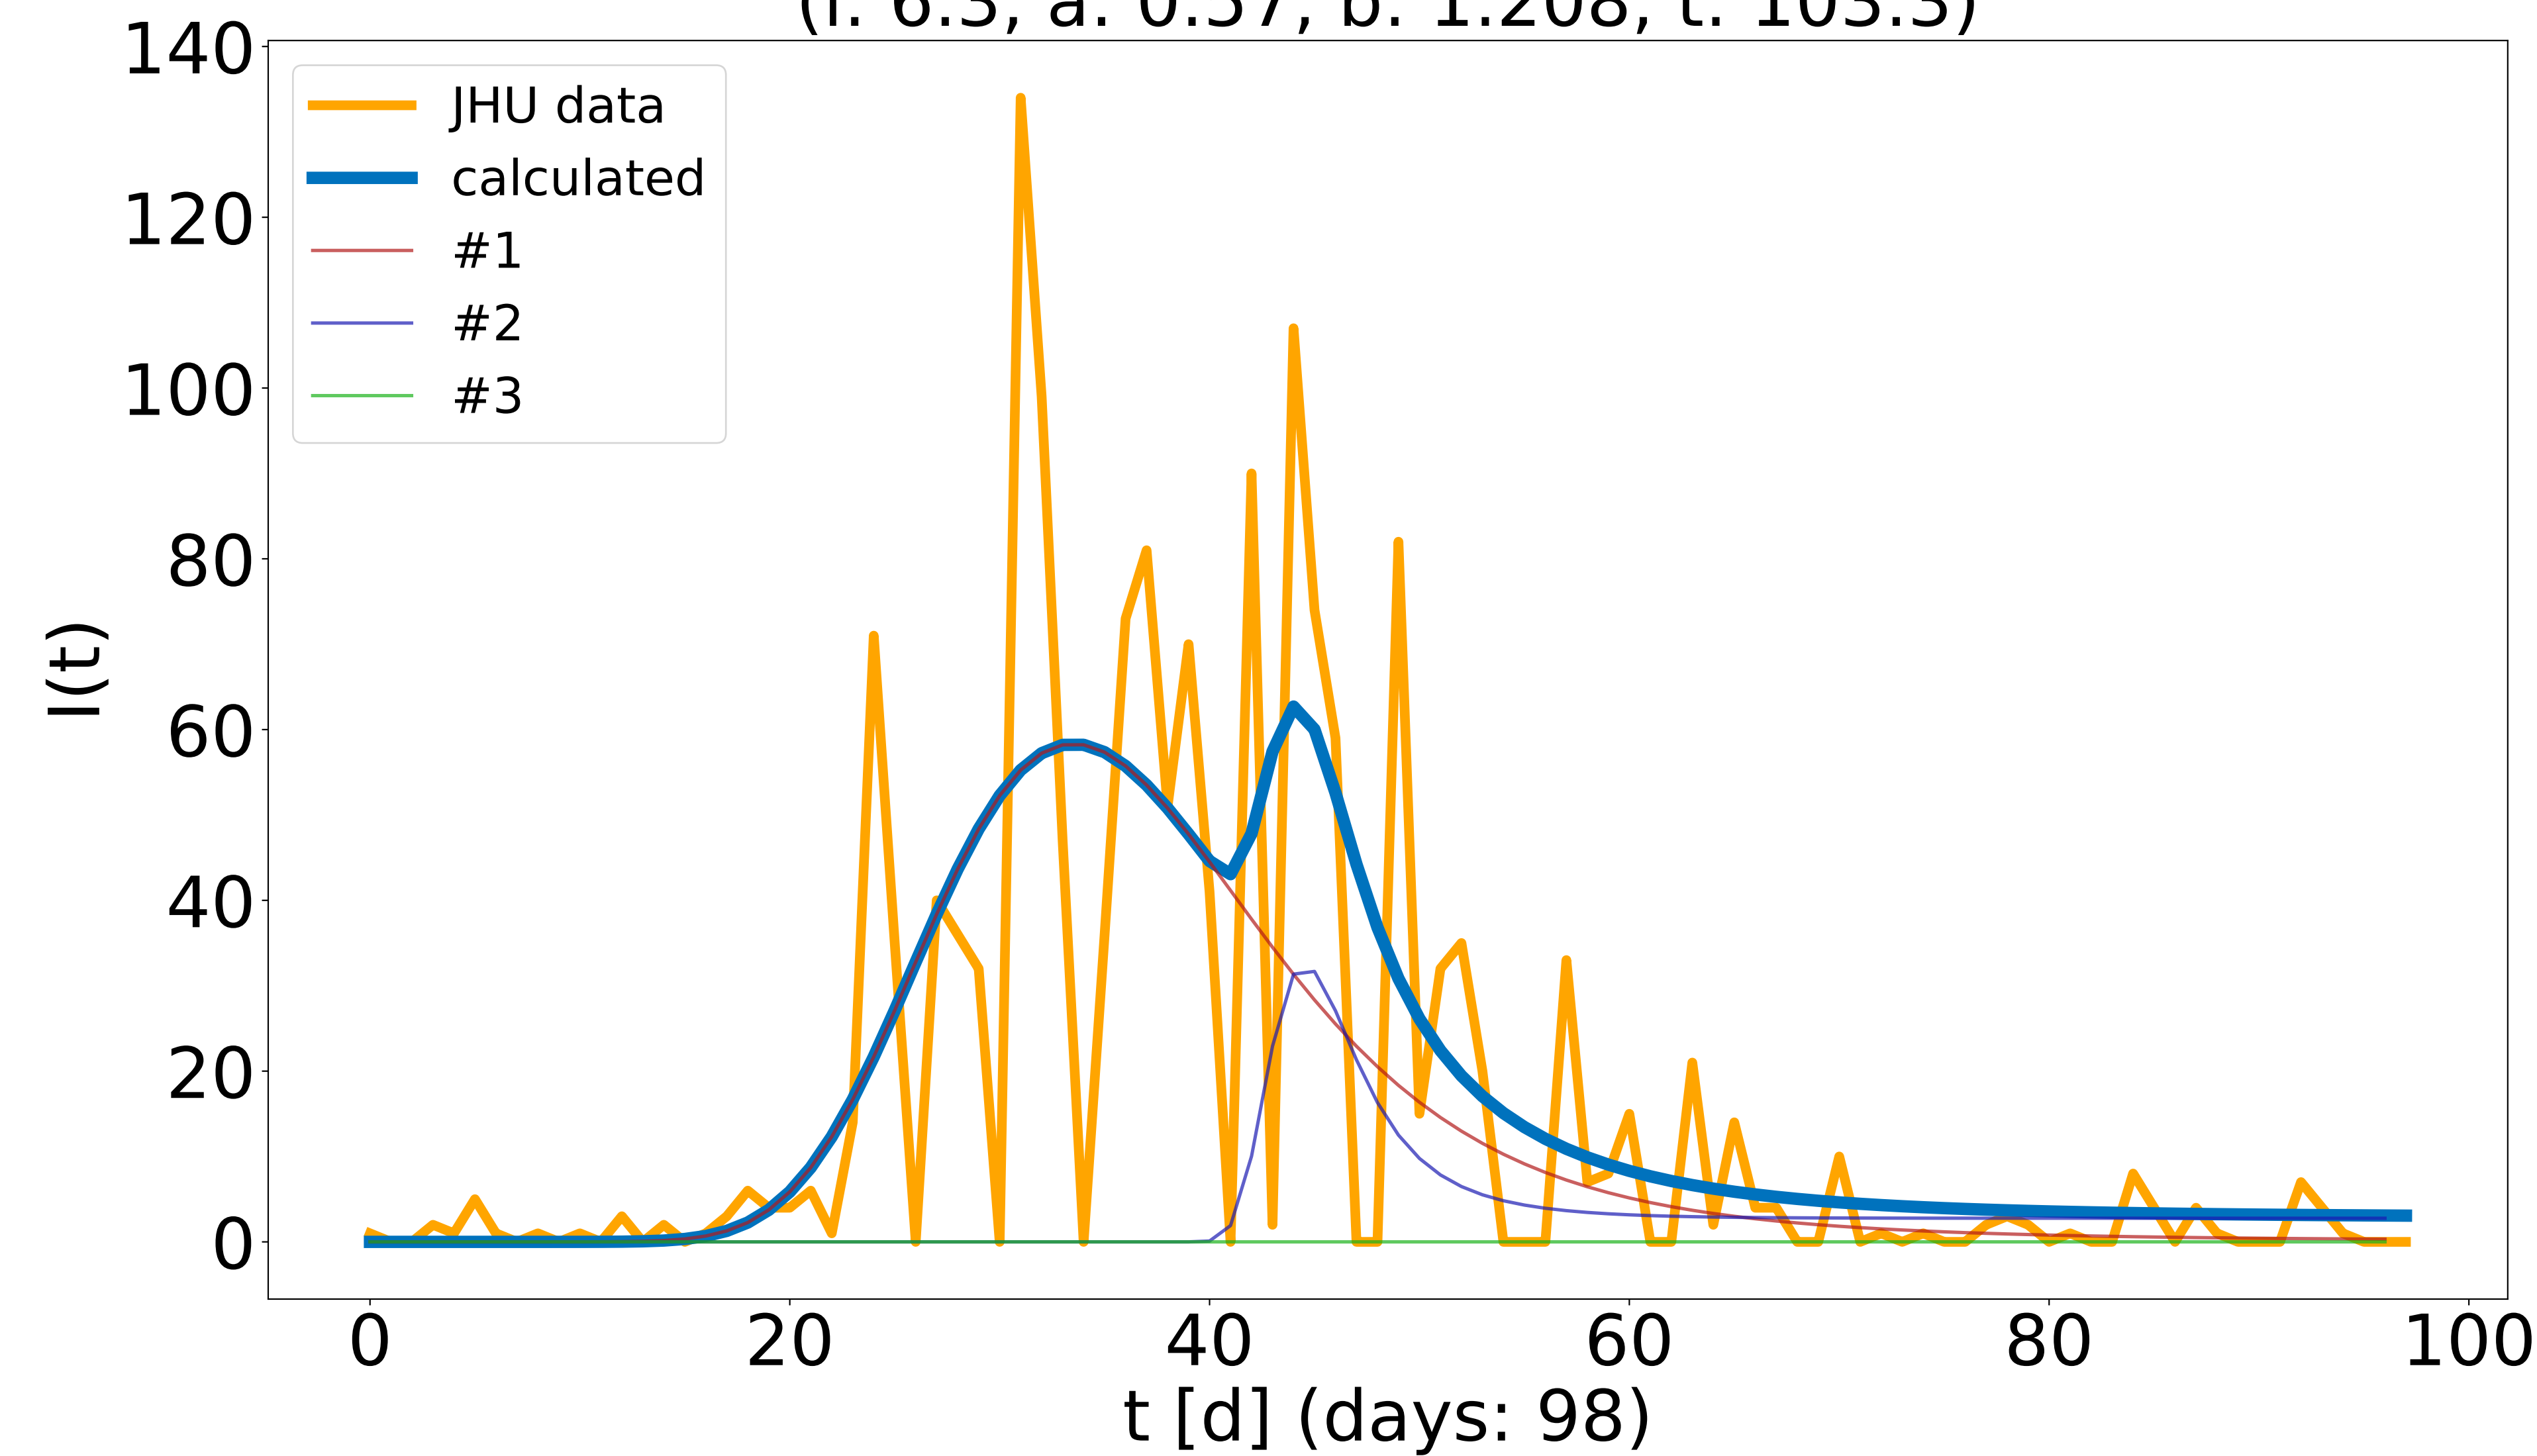

Finney, Kansas, US, Finney ( $R^2 = 0.984$ )  
(i: 0.1, a: 0.76, b: 0.045, t: 12.0)  
(i: 0.1, a: 1.709, b: 0.123, t: 36.6)  
(i: 1.7, a: 0.228, b: 1.107, t: 100.6)

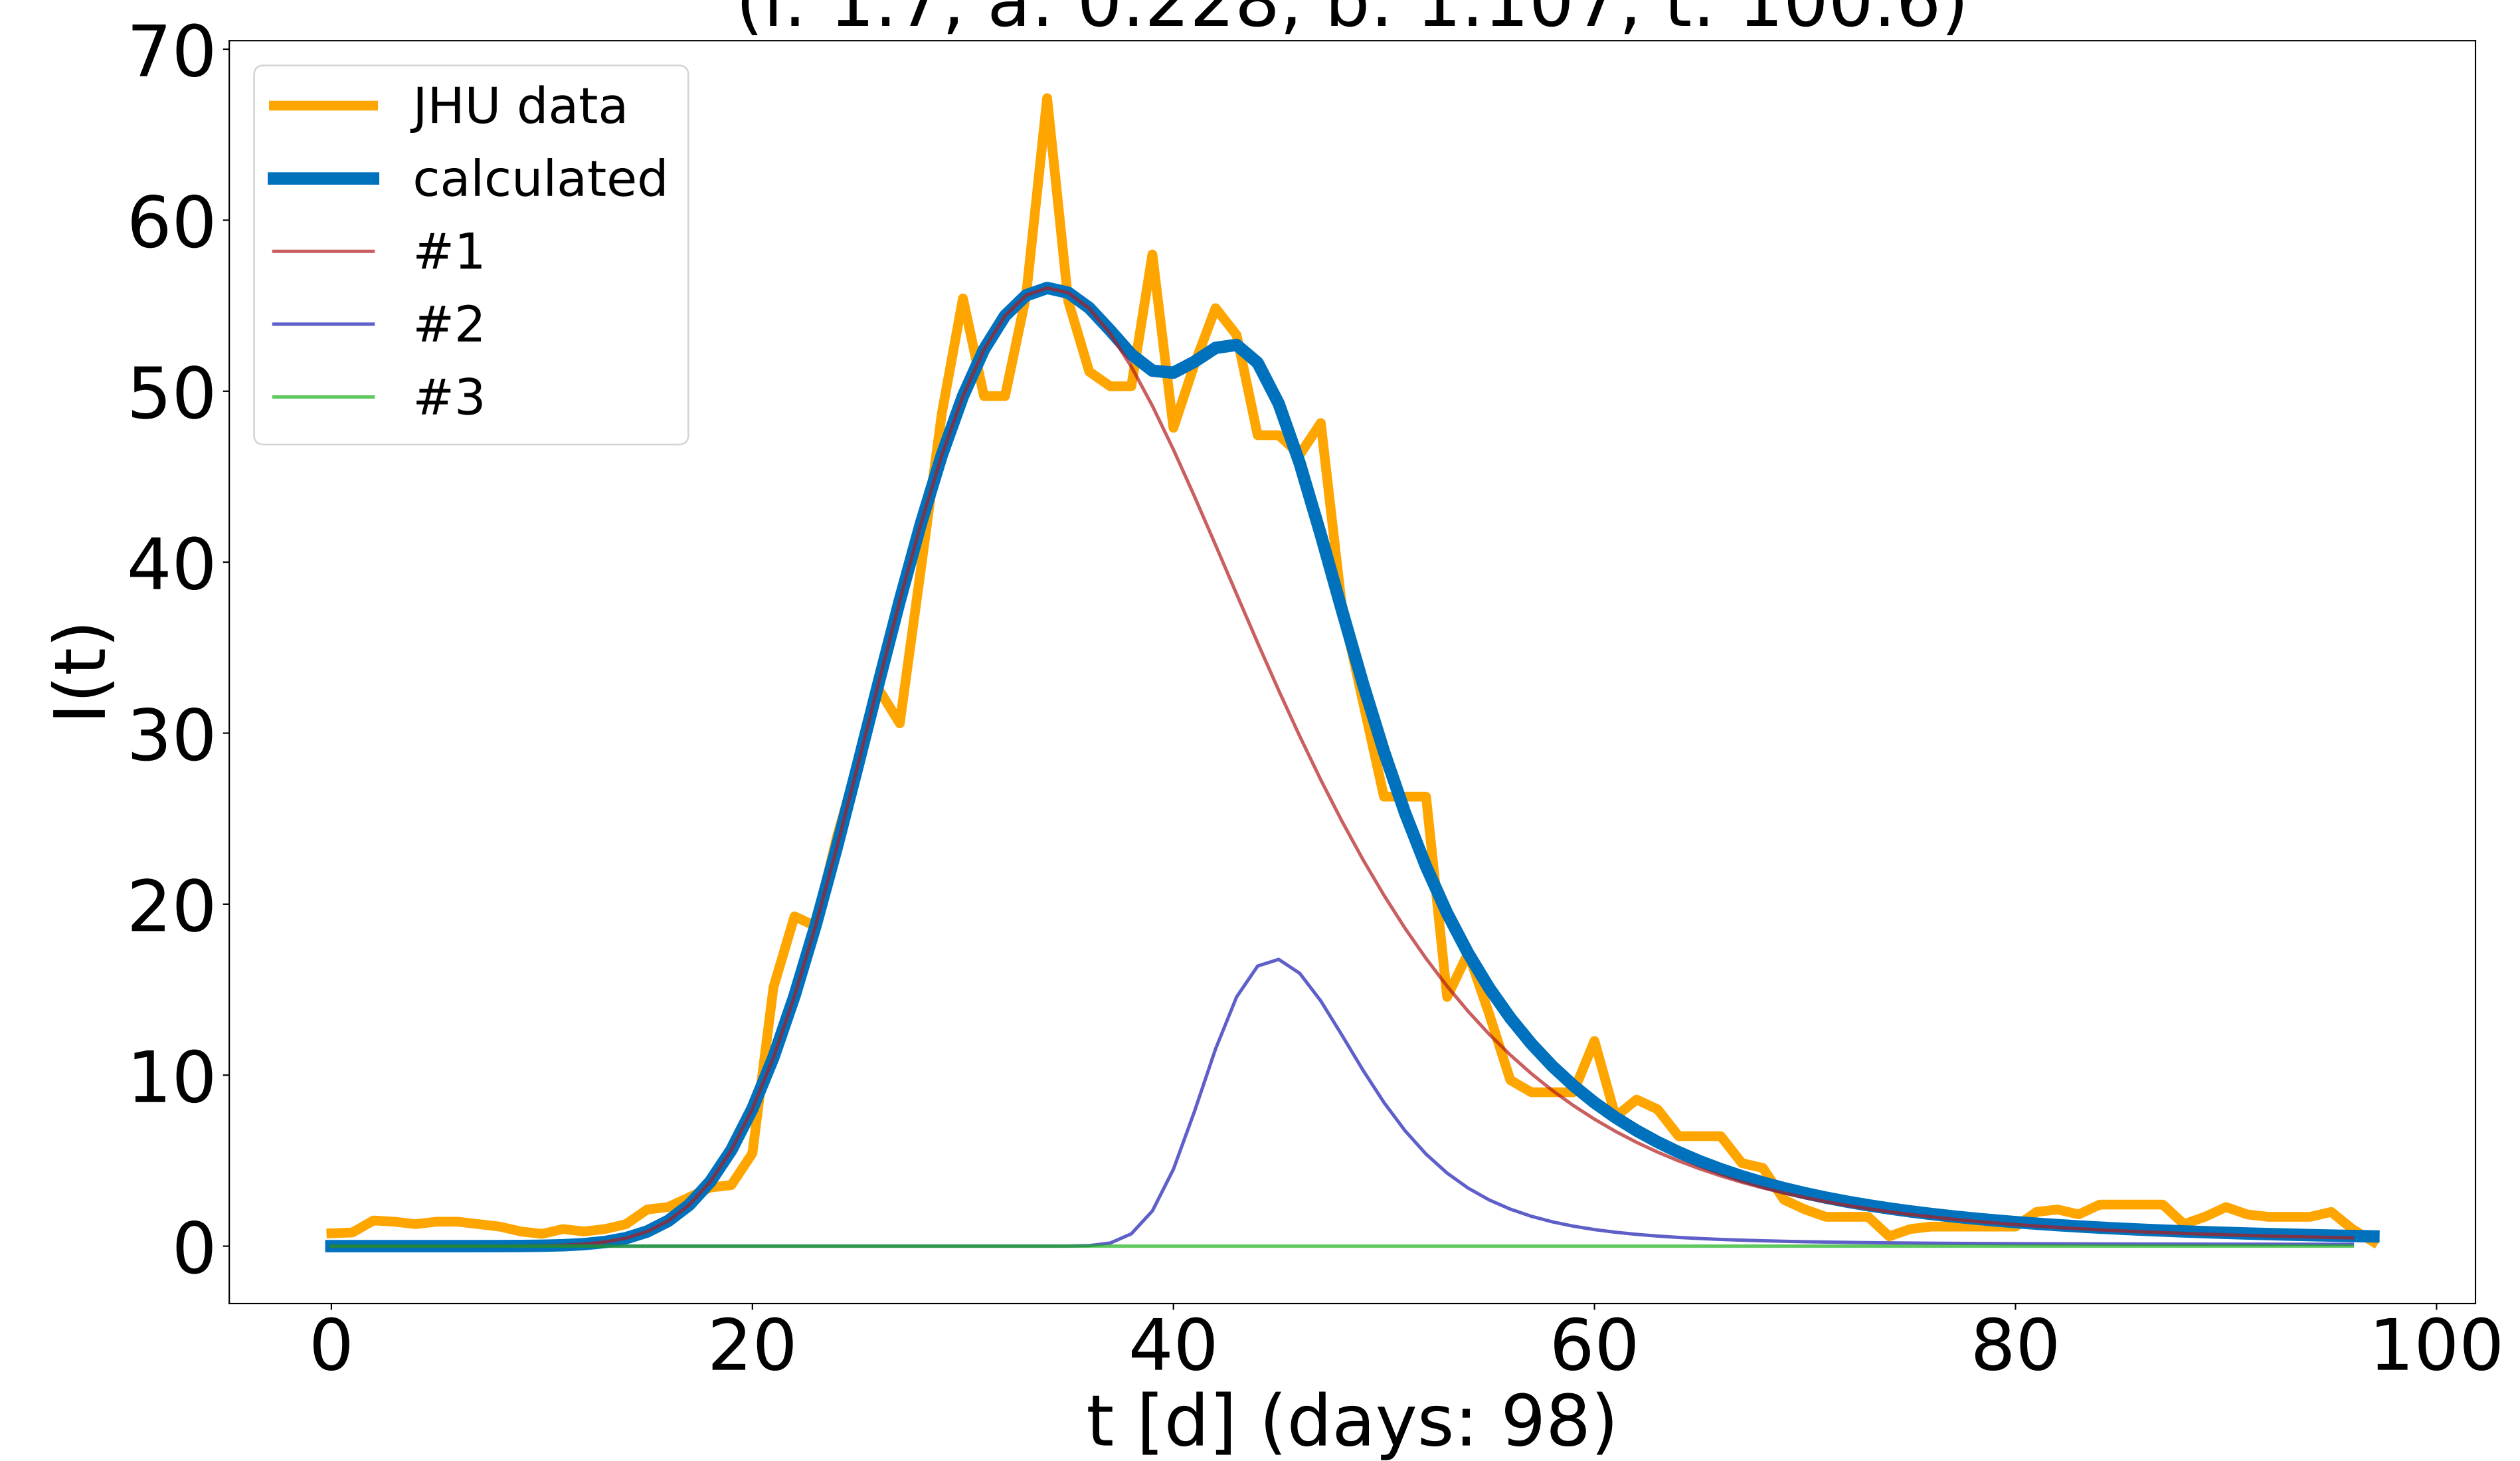

Sedgwick, Kansas, US, Sedgwick ( $R^2 = 0.733$ )

(i: 2.7, a: 0.17, b: 0.042, t: 2.3)

(i: 0.1, a: 0.33, b: 0.02, t: 64.1)

(i: 3.6, a: 2.0, b: 0.338, t: 102.4)

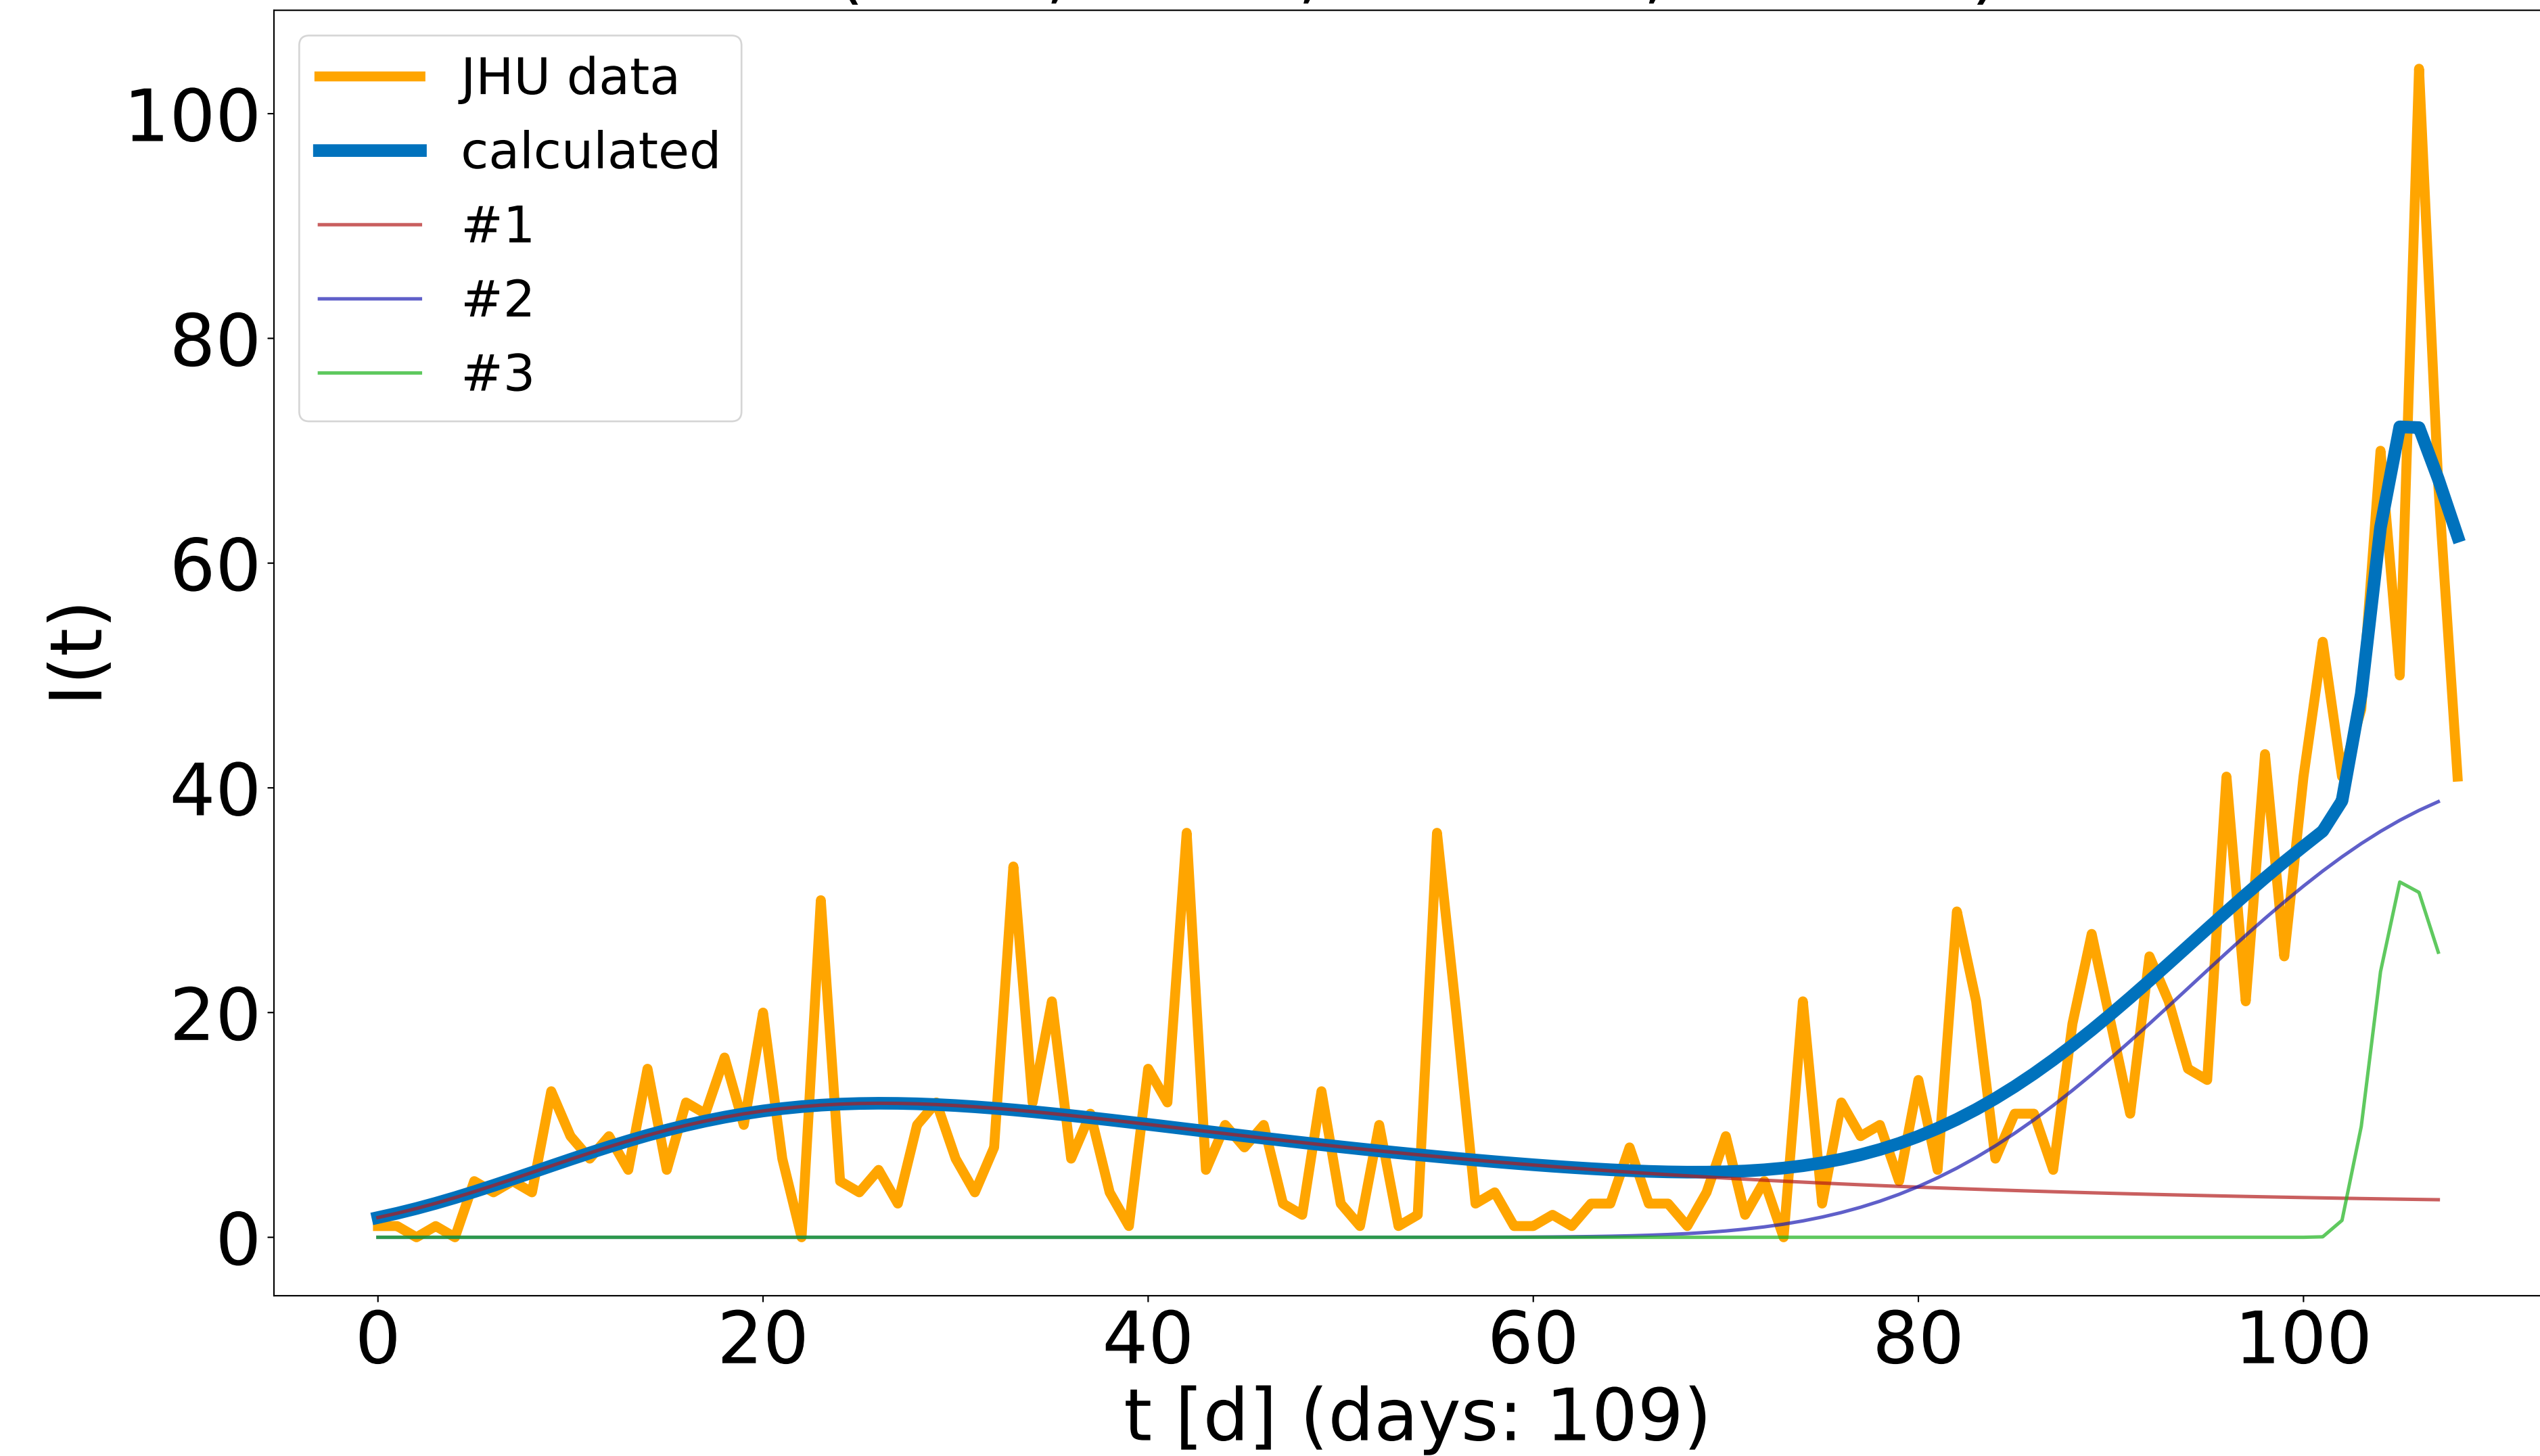

Sedgwick, Kansas, US, Sedgwick ( $R^2 = 0.974$ )

(i: 0.7, a: 0.48, b: 0.062, t: 1.0)

(i: 3.8, a: 0.351, b: 0.15, t: 30.3)

(i: 0.1, a: 0.185, b: 0.008, t: 55.1)

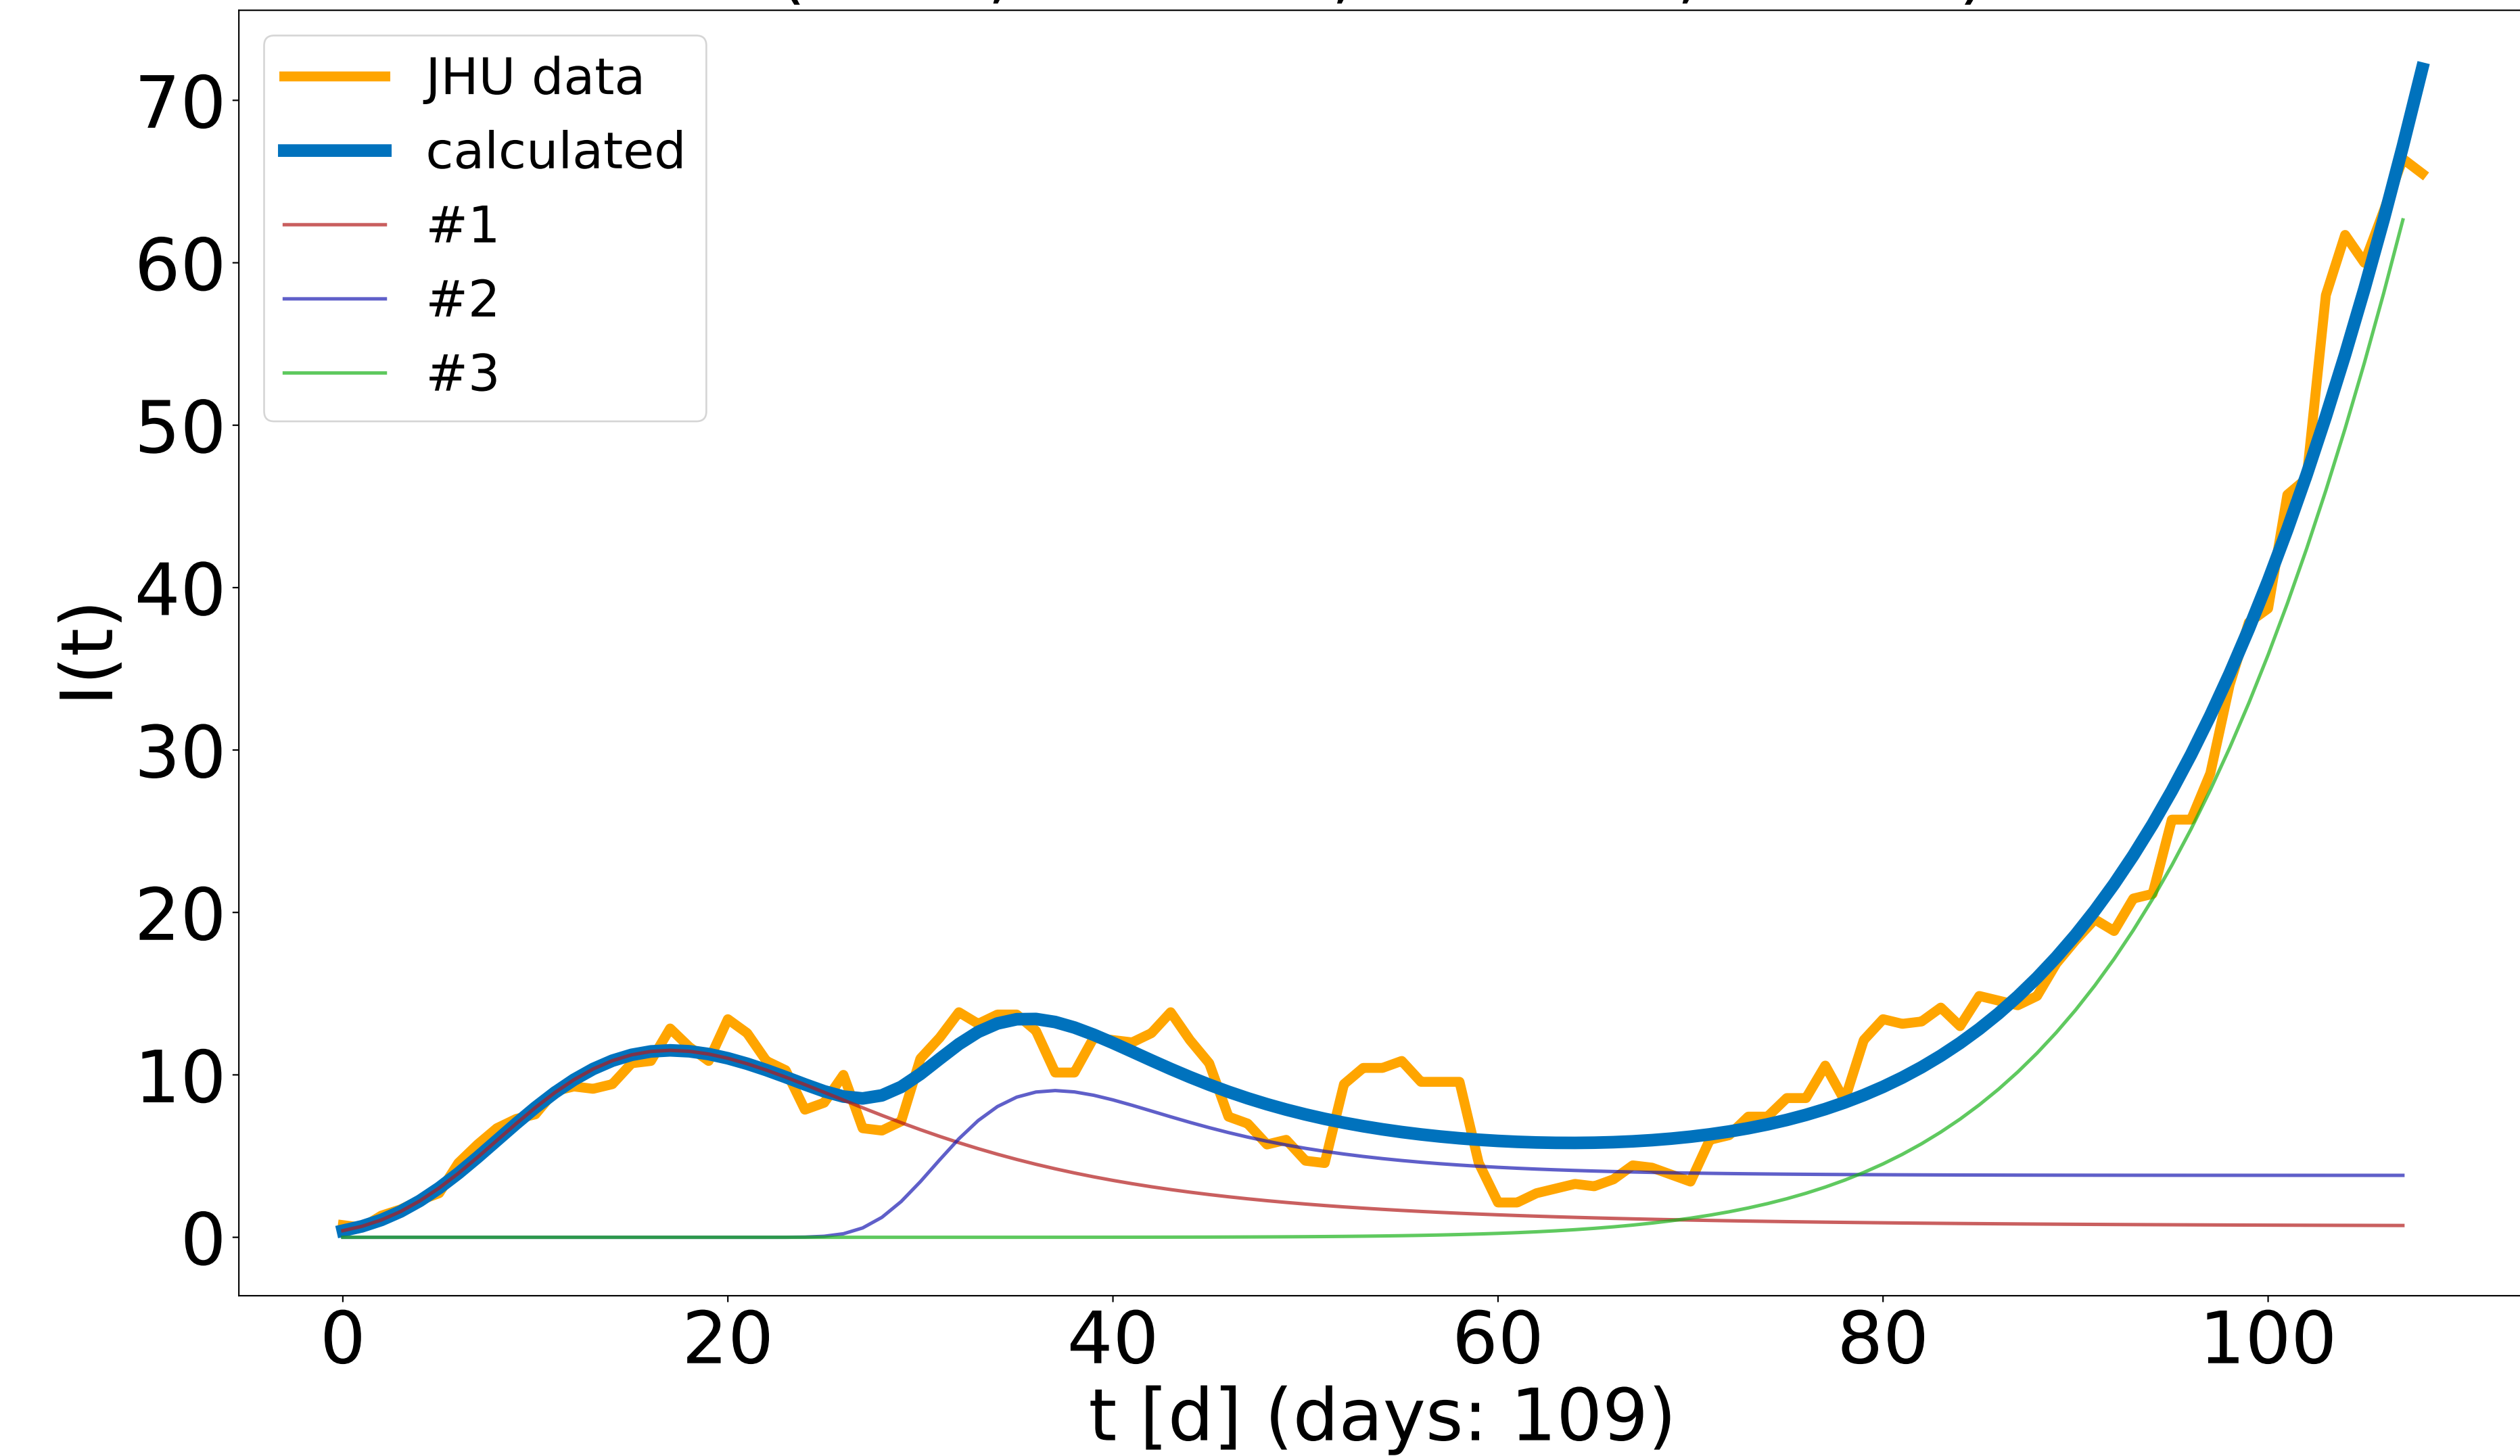

Calcasieu, Louisiana, US, Calcasieu ( $R^2 = 0.65$ )

(i: 5.5, a: 0.398, b: 0.127, t: 6.7)

(i: 9.9, a: 1.587, b: 1.4, t: 61.5)

(i: 129.0, a: 2.0, b: 1.25, t: 102.3)

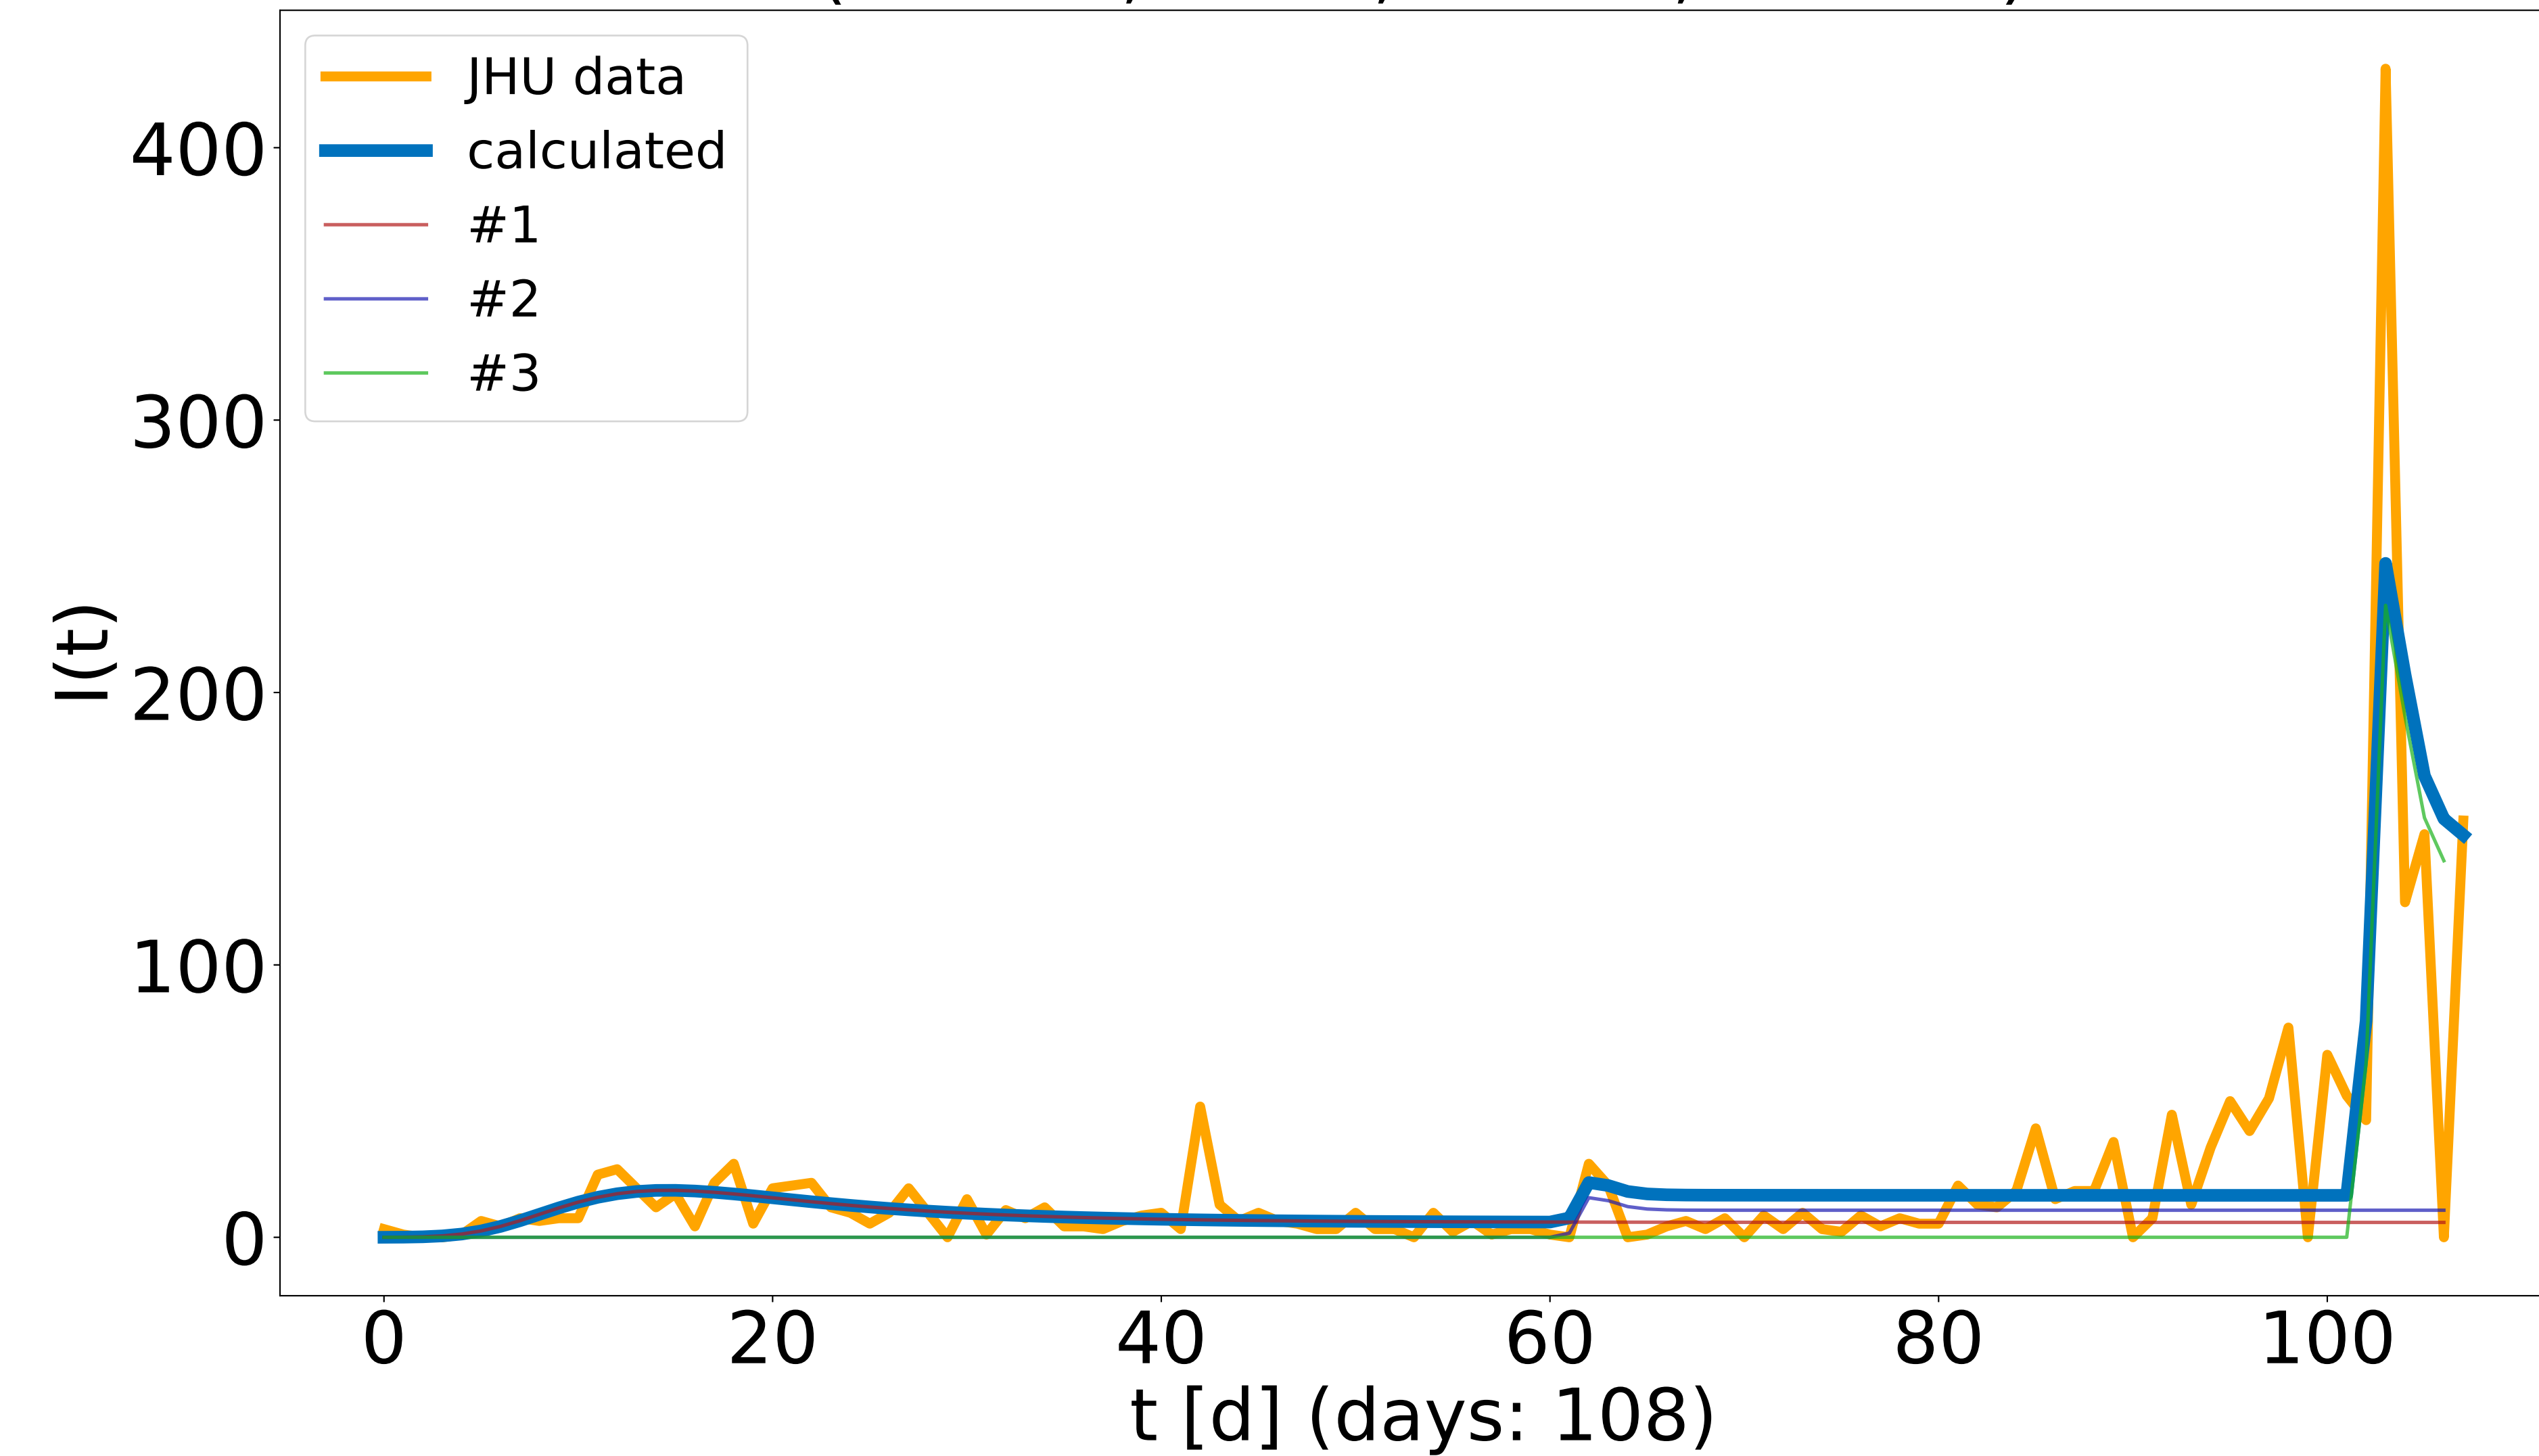

Calcasieu, Louisiana, US, Calcasieu ( $R^2 = 0.971$ )

(i: 5.5, a: 0.327, b: 0.111, t: 6.2)

(i: 0.1, a: 0.465, b: 0.03, t: 68.7)

(i: 0.1, a: 1.748, b: 0.092, t: 93.7)

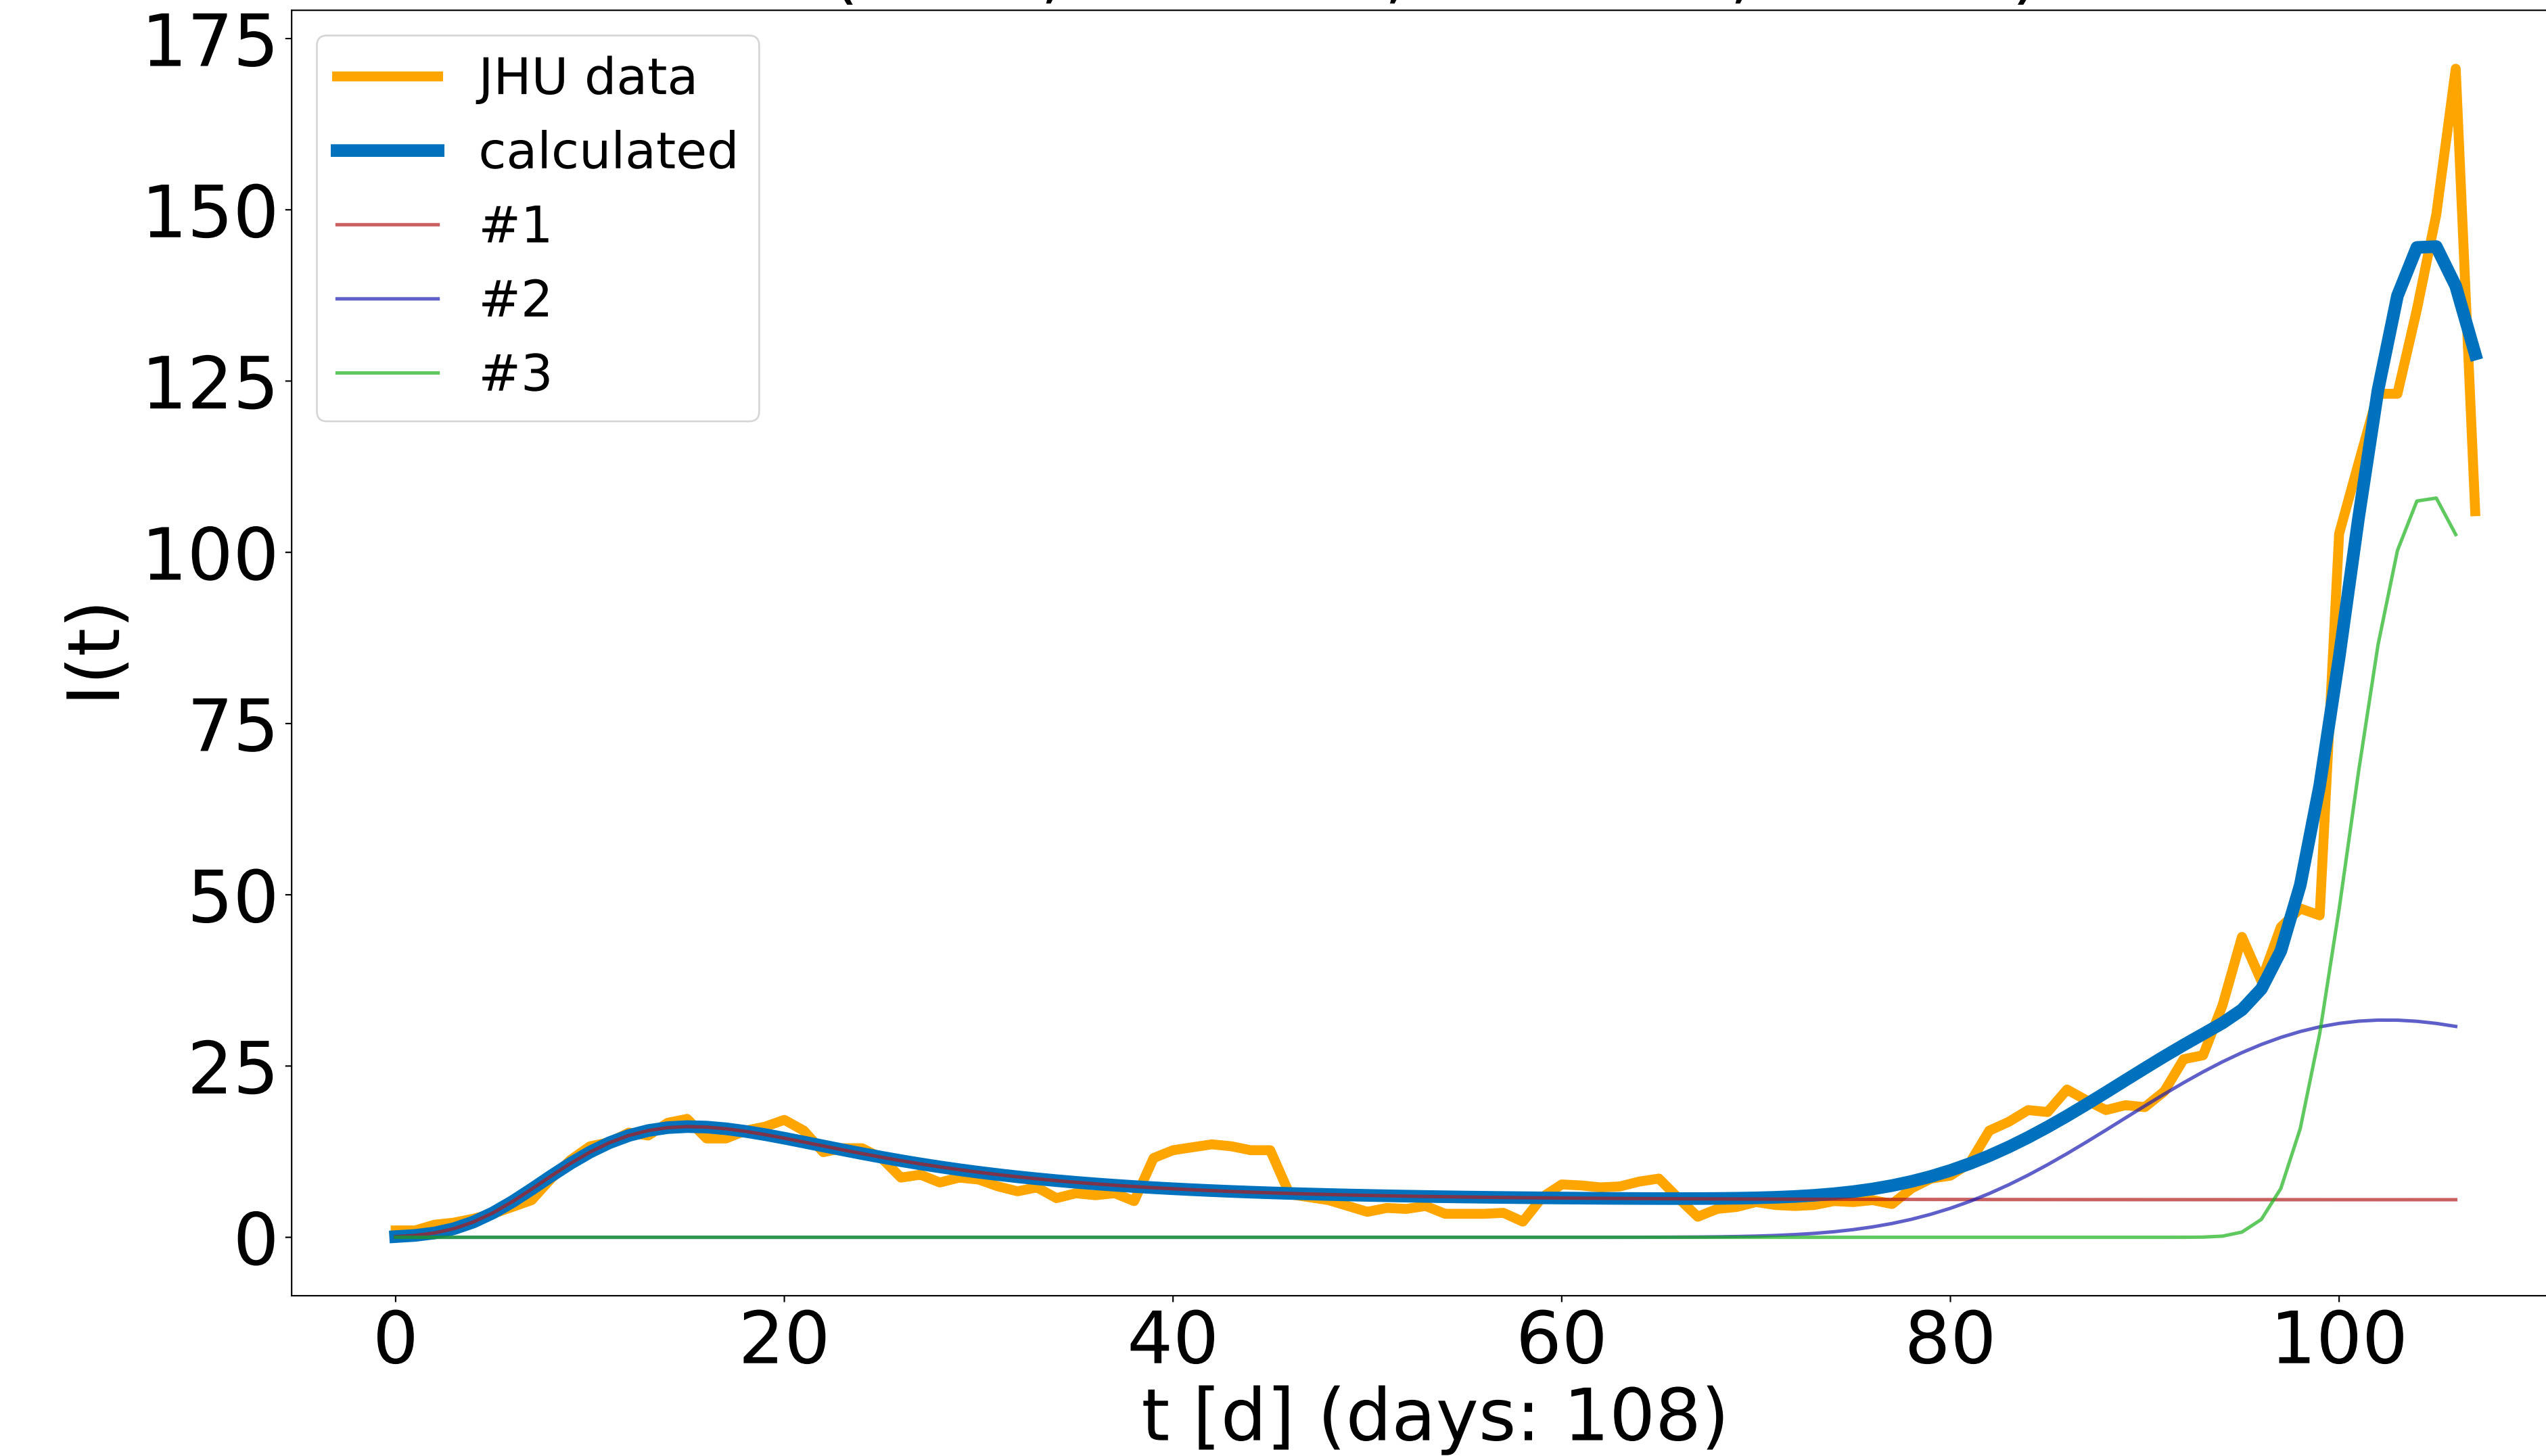



Jefferson, Louisiana, US, Jefferson ( $R^2 = 0.678$ )  
(i: 0.1, a: 0.993, b: 0.049, t: 1.0)  
(i: 39.1, a: 2.0, b: 0.348, t: 17.4)  
(i: 0.1, a: 0.265, b: 0.014, t: 61.9)

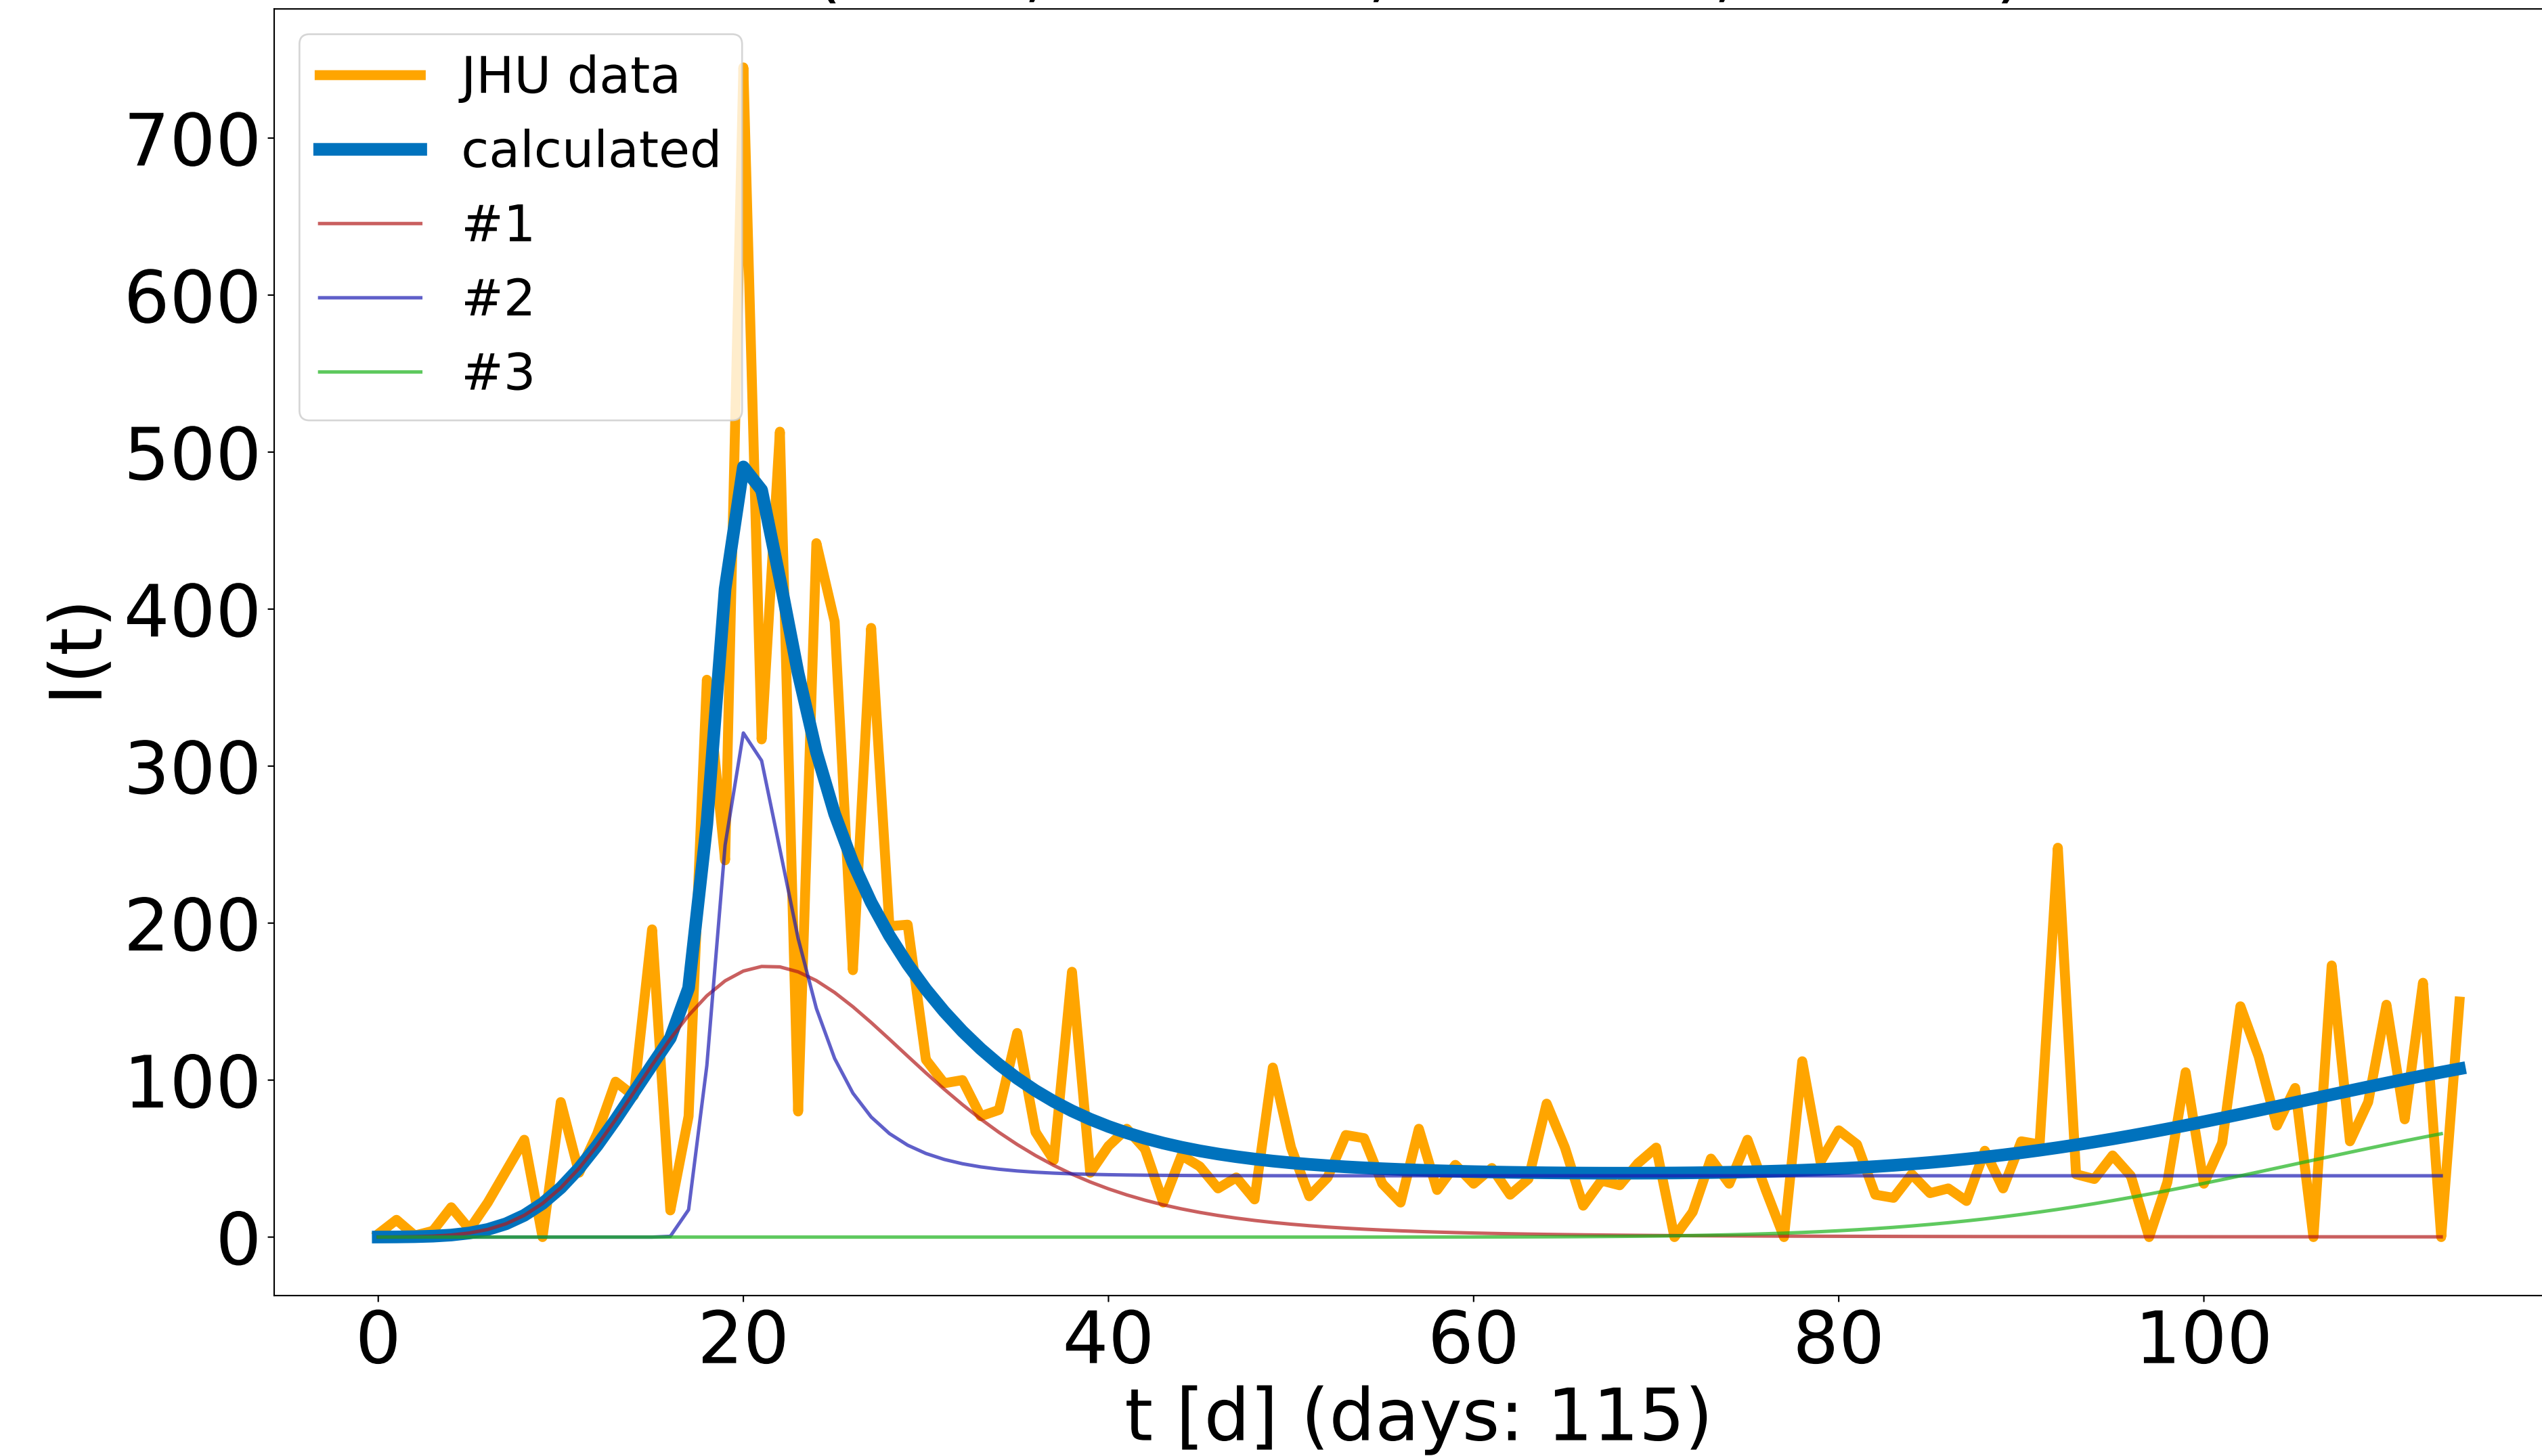

Jefferson, Louisiana, US, Jefferson ( $R^2 = 0.971$ )  
(i: 0.1, a: 1.399, b: 0.063, t: 5.7)  
(i: 40.1, a: 0.001, b: 1.174, t: 39.1)  
(i: 0.1, a: 0.284, b: 0.016, t: 64.0)

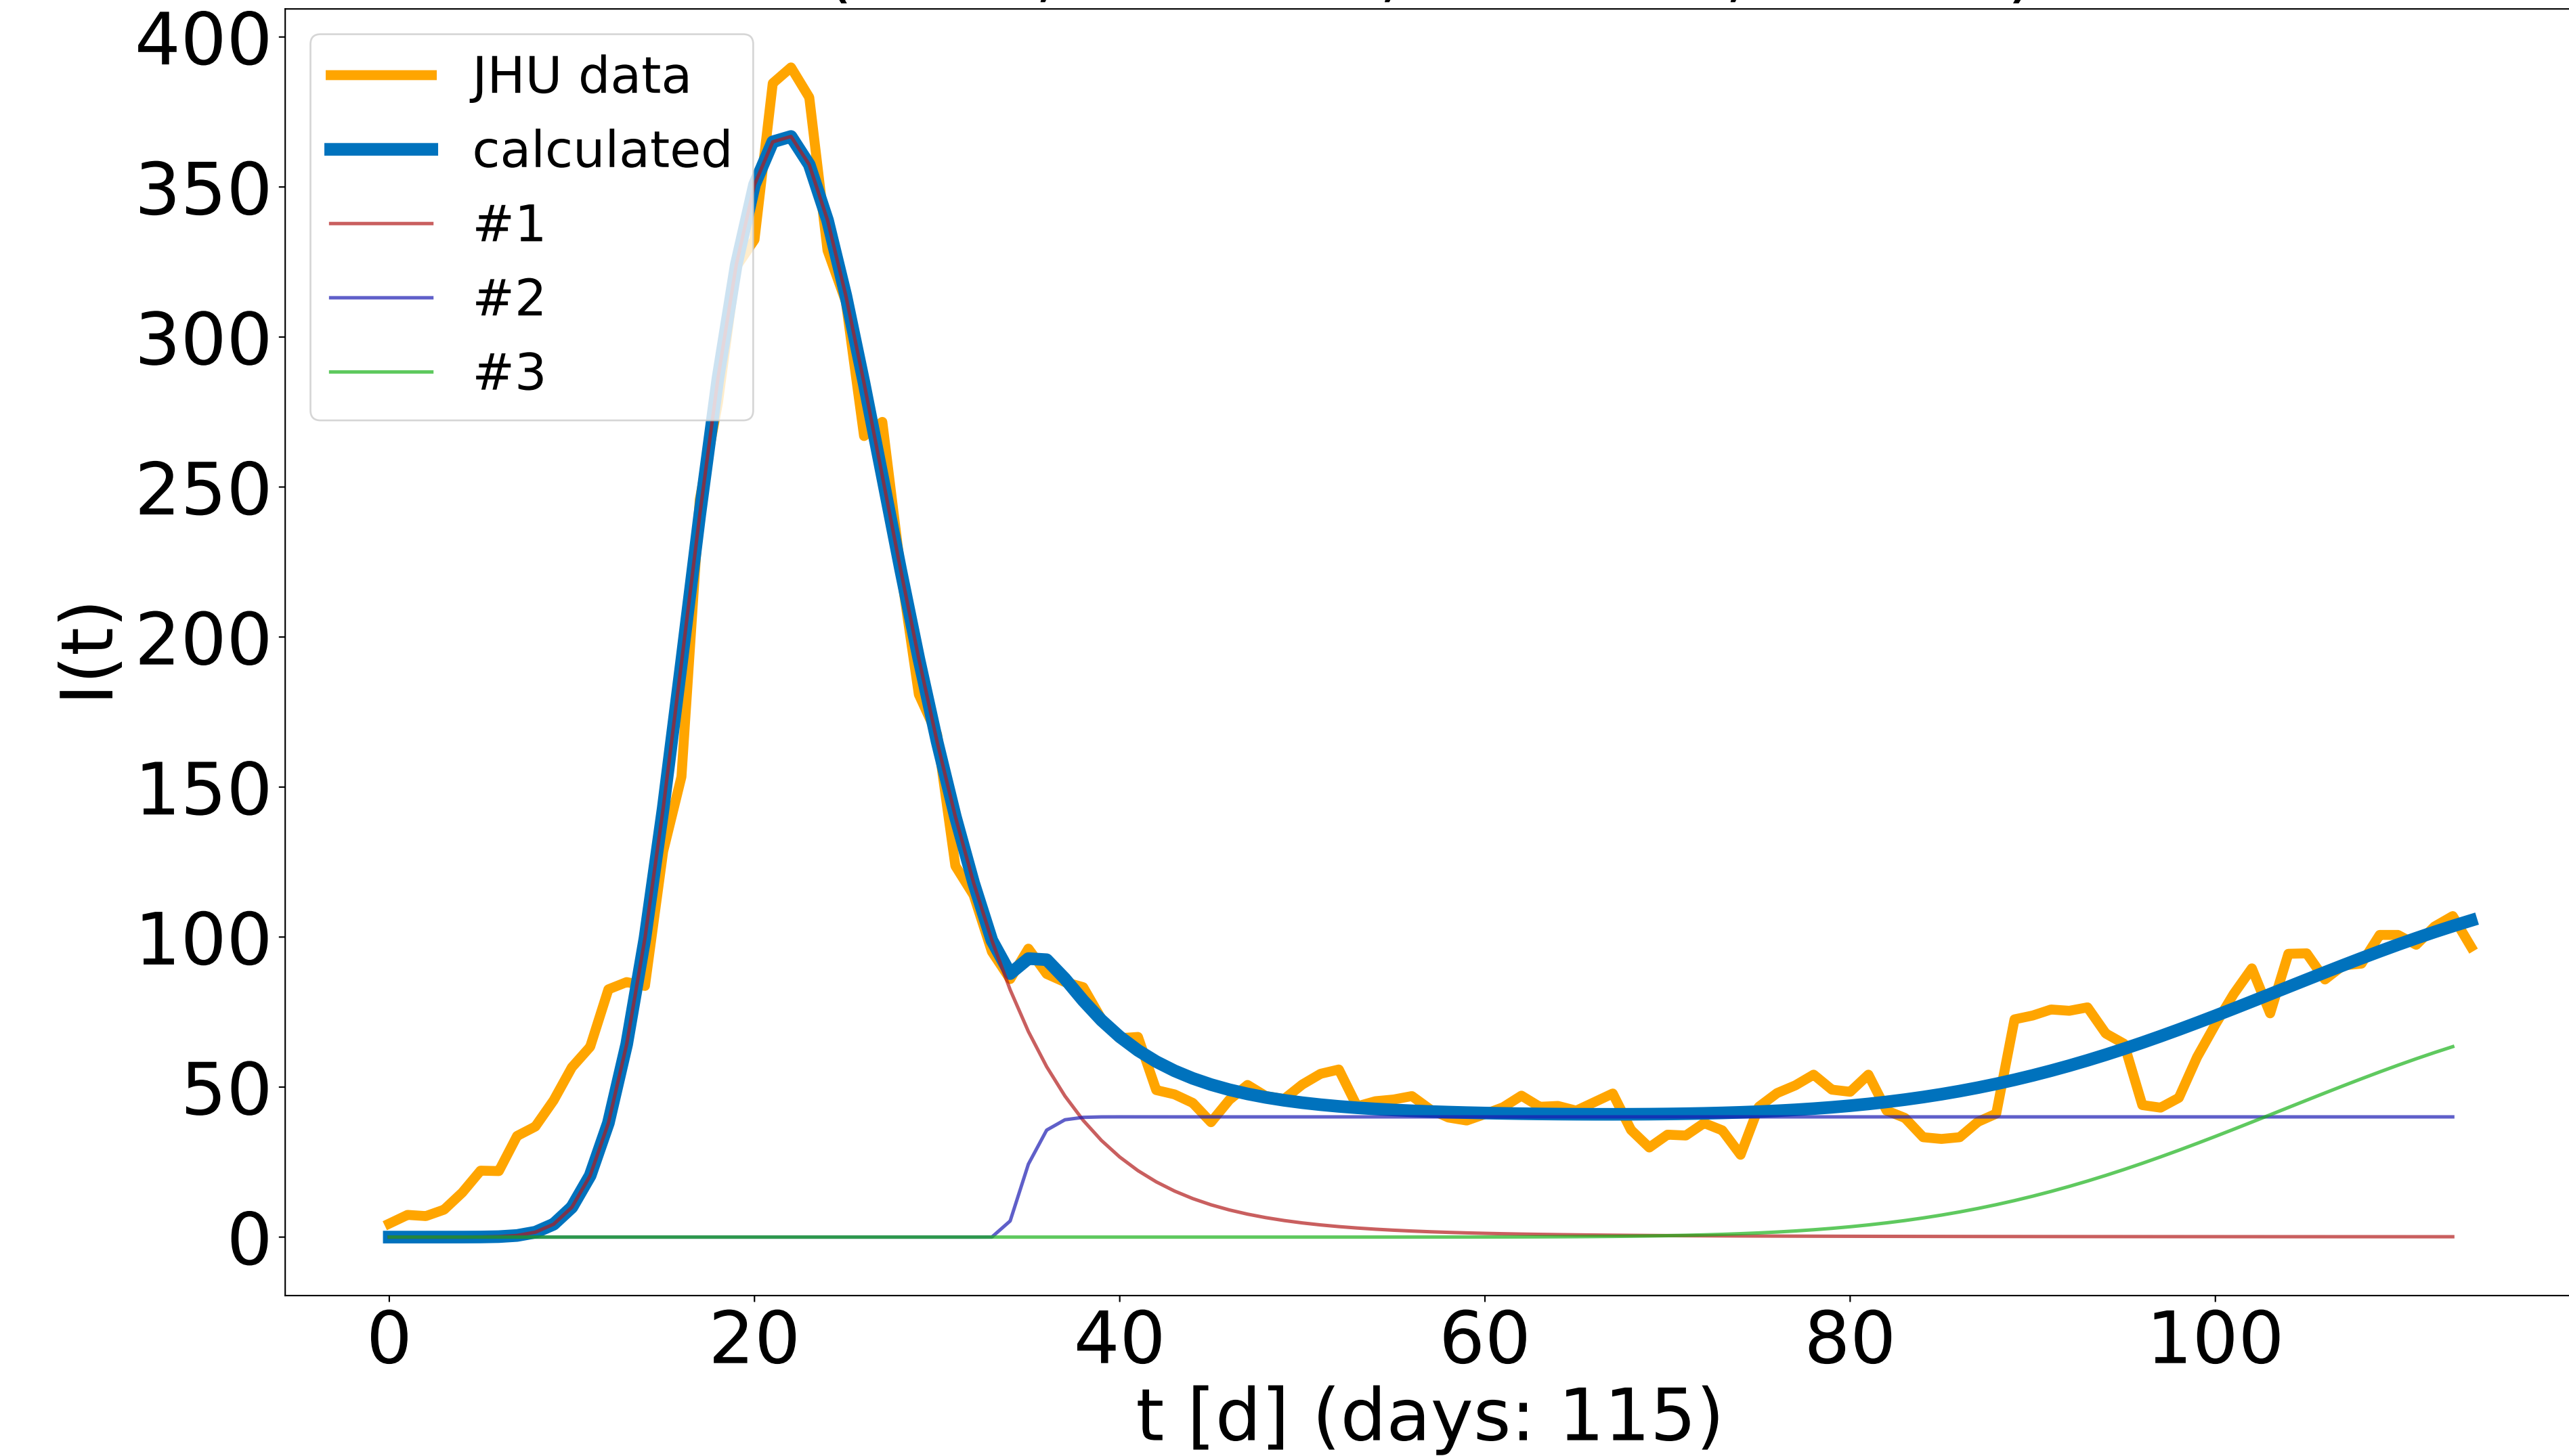

Worcester, Massachusetts, US, Worcester ( $R^2 = 0.721$ )

(i: 0.2, a: 0.606, b: 0.036, t: 1.8)

(i: 0.1, a: 0.494, b: 0.024, t: 14.0)

(i: 14.7, a: 1.999, b: 1.4, t: 108.5)

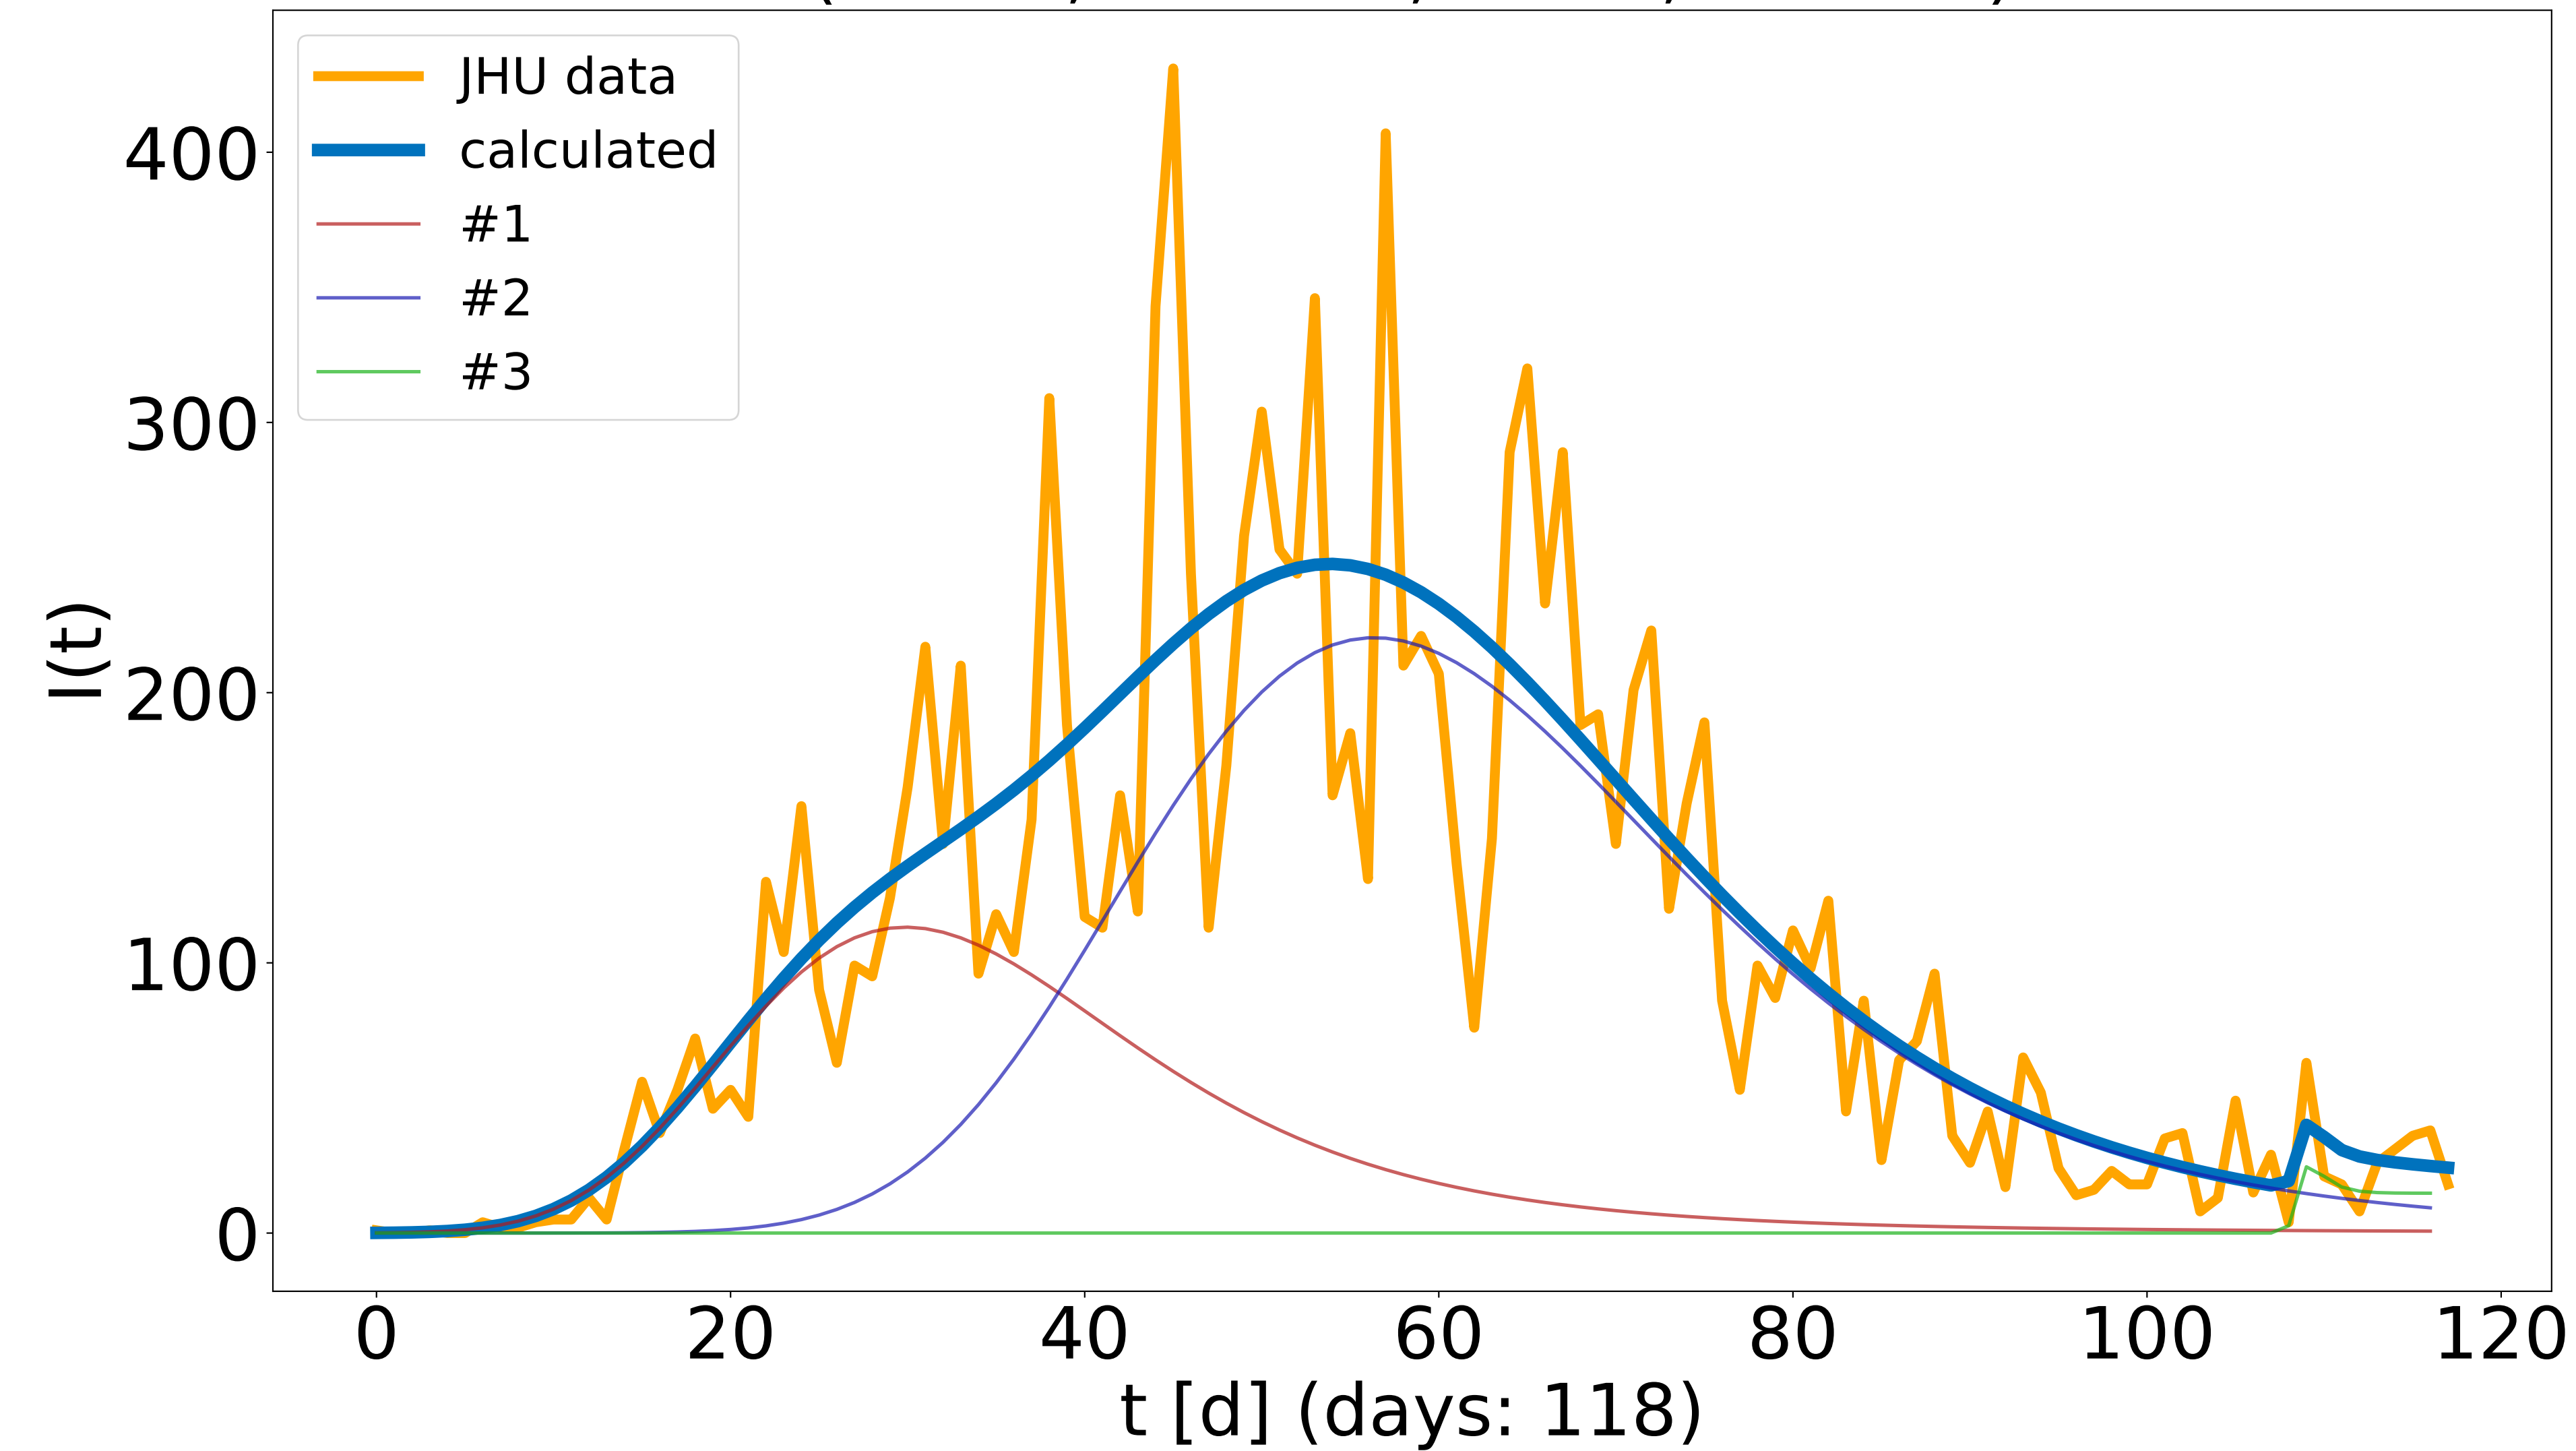

Worcester, Massachusetts, US, Worcester ( $R^2 = 0.973$ )

(i: 0.2, a: 0.566, b: 0.033, t: 1.0)

(i: 0.1, a: 0.495, b: 0.024, t: 14.9)

(i: 20.9, a: 0.001, b: 0.162, t: 130.8)

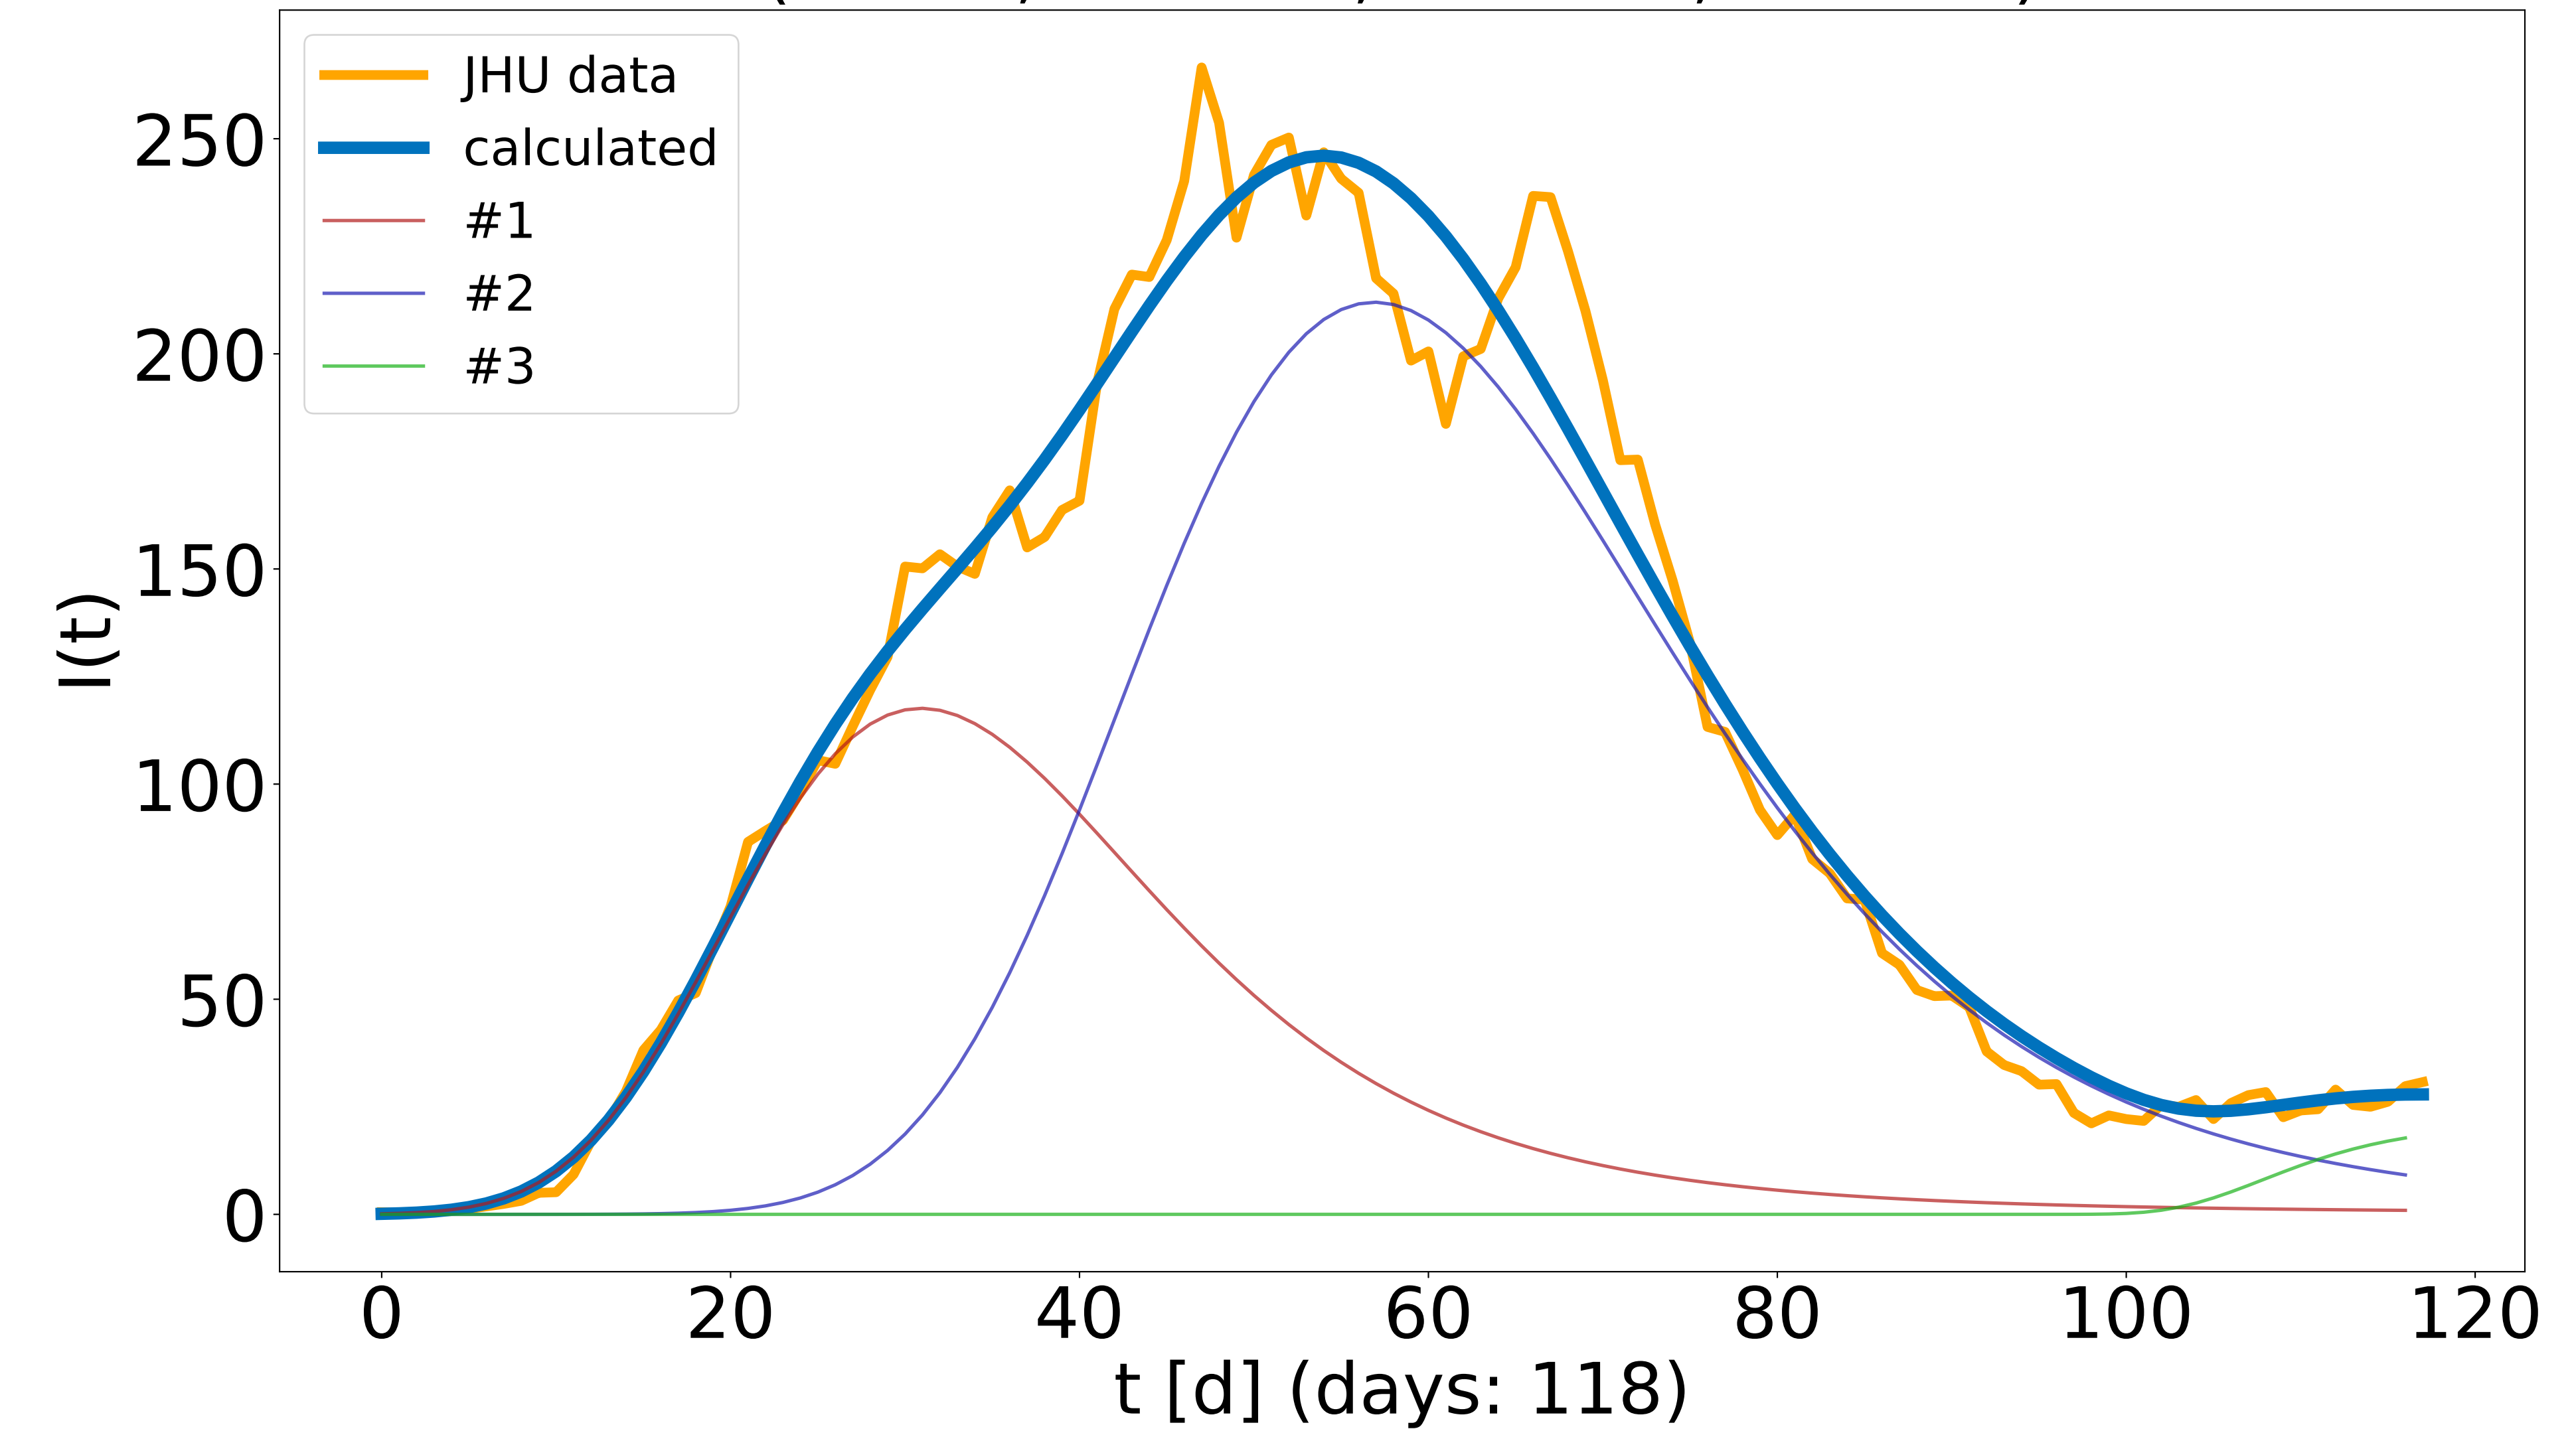

Oakland, Michigan, US, Oakland ( $R^2 = 0.764$ )

(i: 4.0, a: 0.601, b: 0.051, t: 4.9)

(i: 47.0, a: 2.0, b: 1.179, t: 41.8)

(i: 1.9, a: 2.0, b: 0.417, t: 98.5)

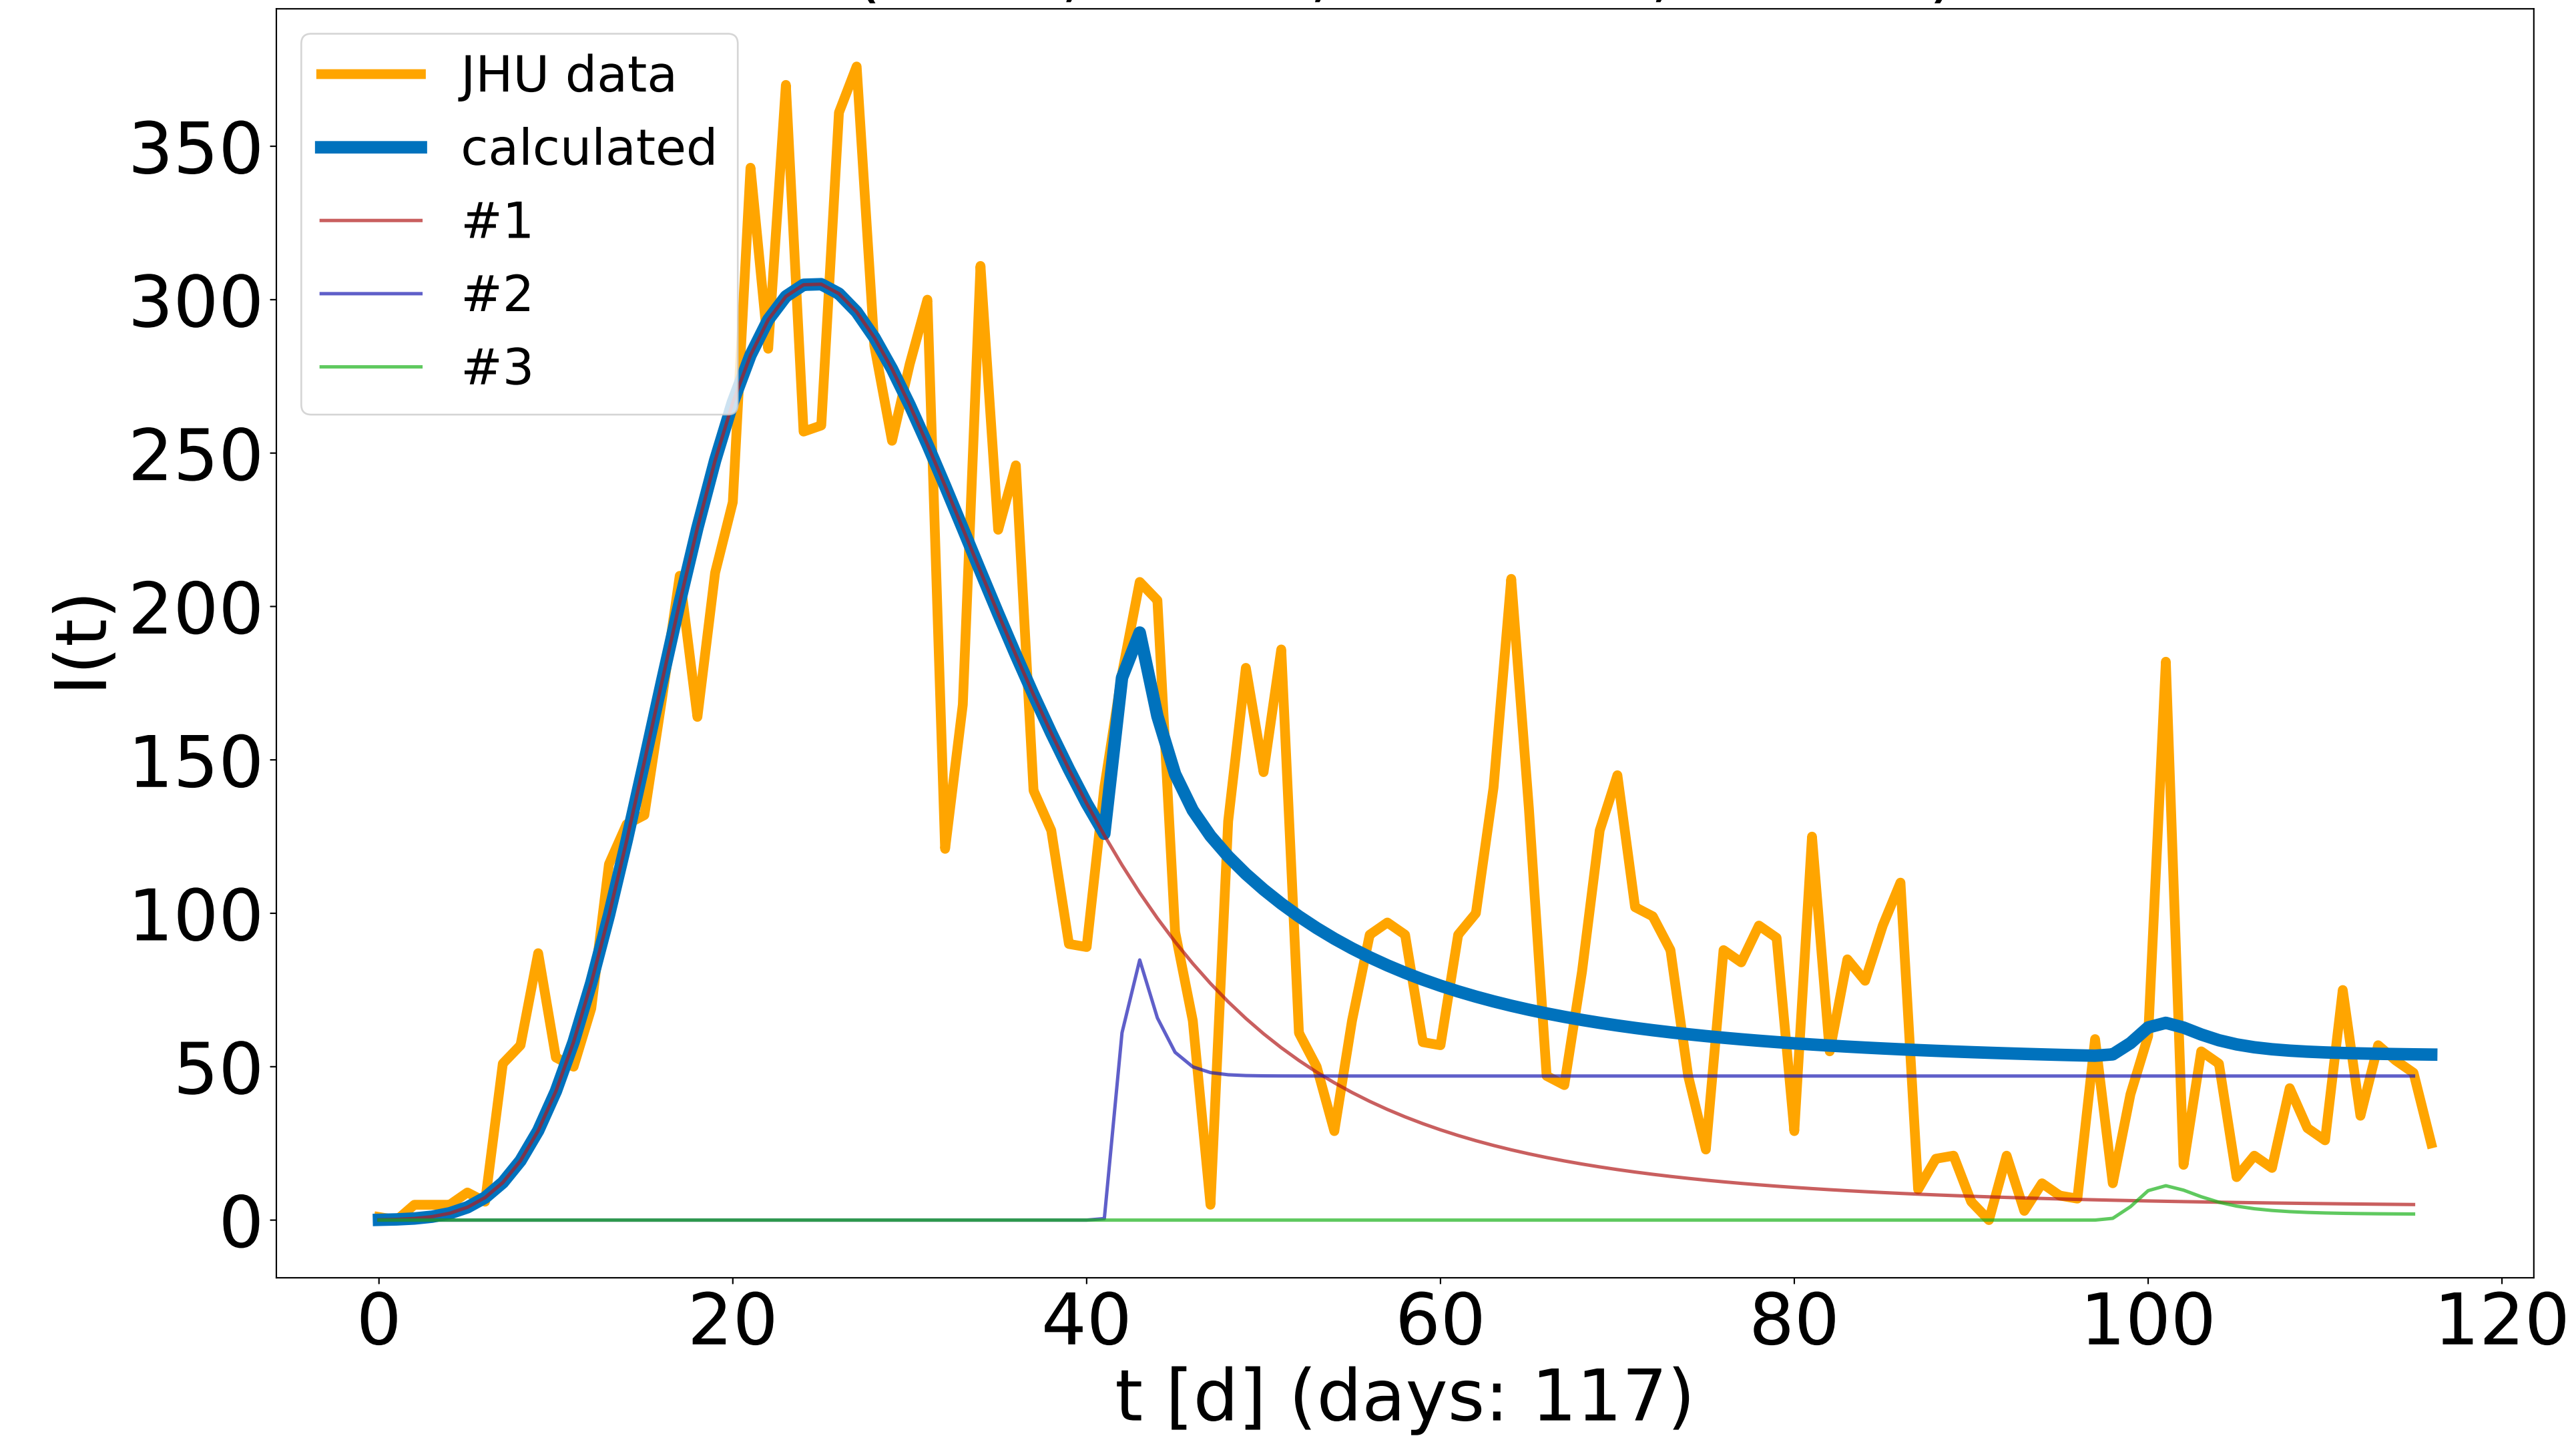

Oakland, Michigan, US, Oakland ( $R^2 = 0.974$ )

(i: 0.8, a: 0.677, b: 0.042, t: 1.0)

(i: 0.1, a: 1.172, b: 0.069, t: 34.5)

(i: 35.1, a: 0.325, b: 0.125, t: 58.6)

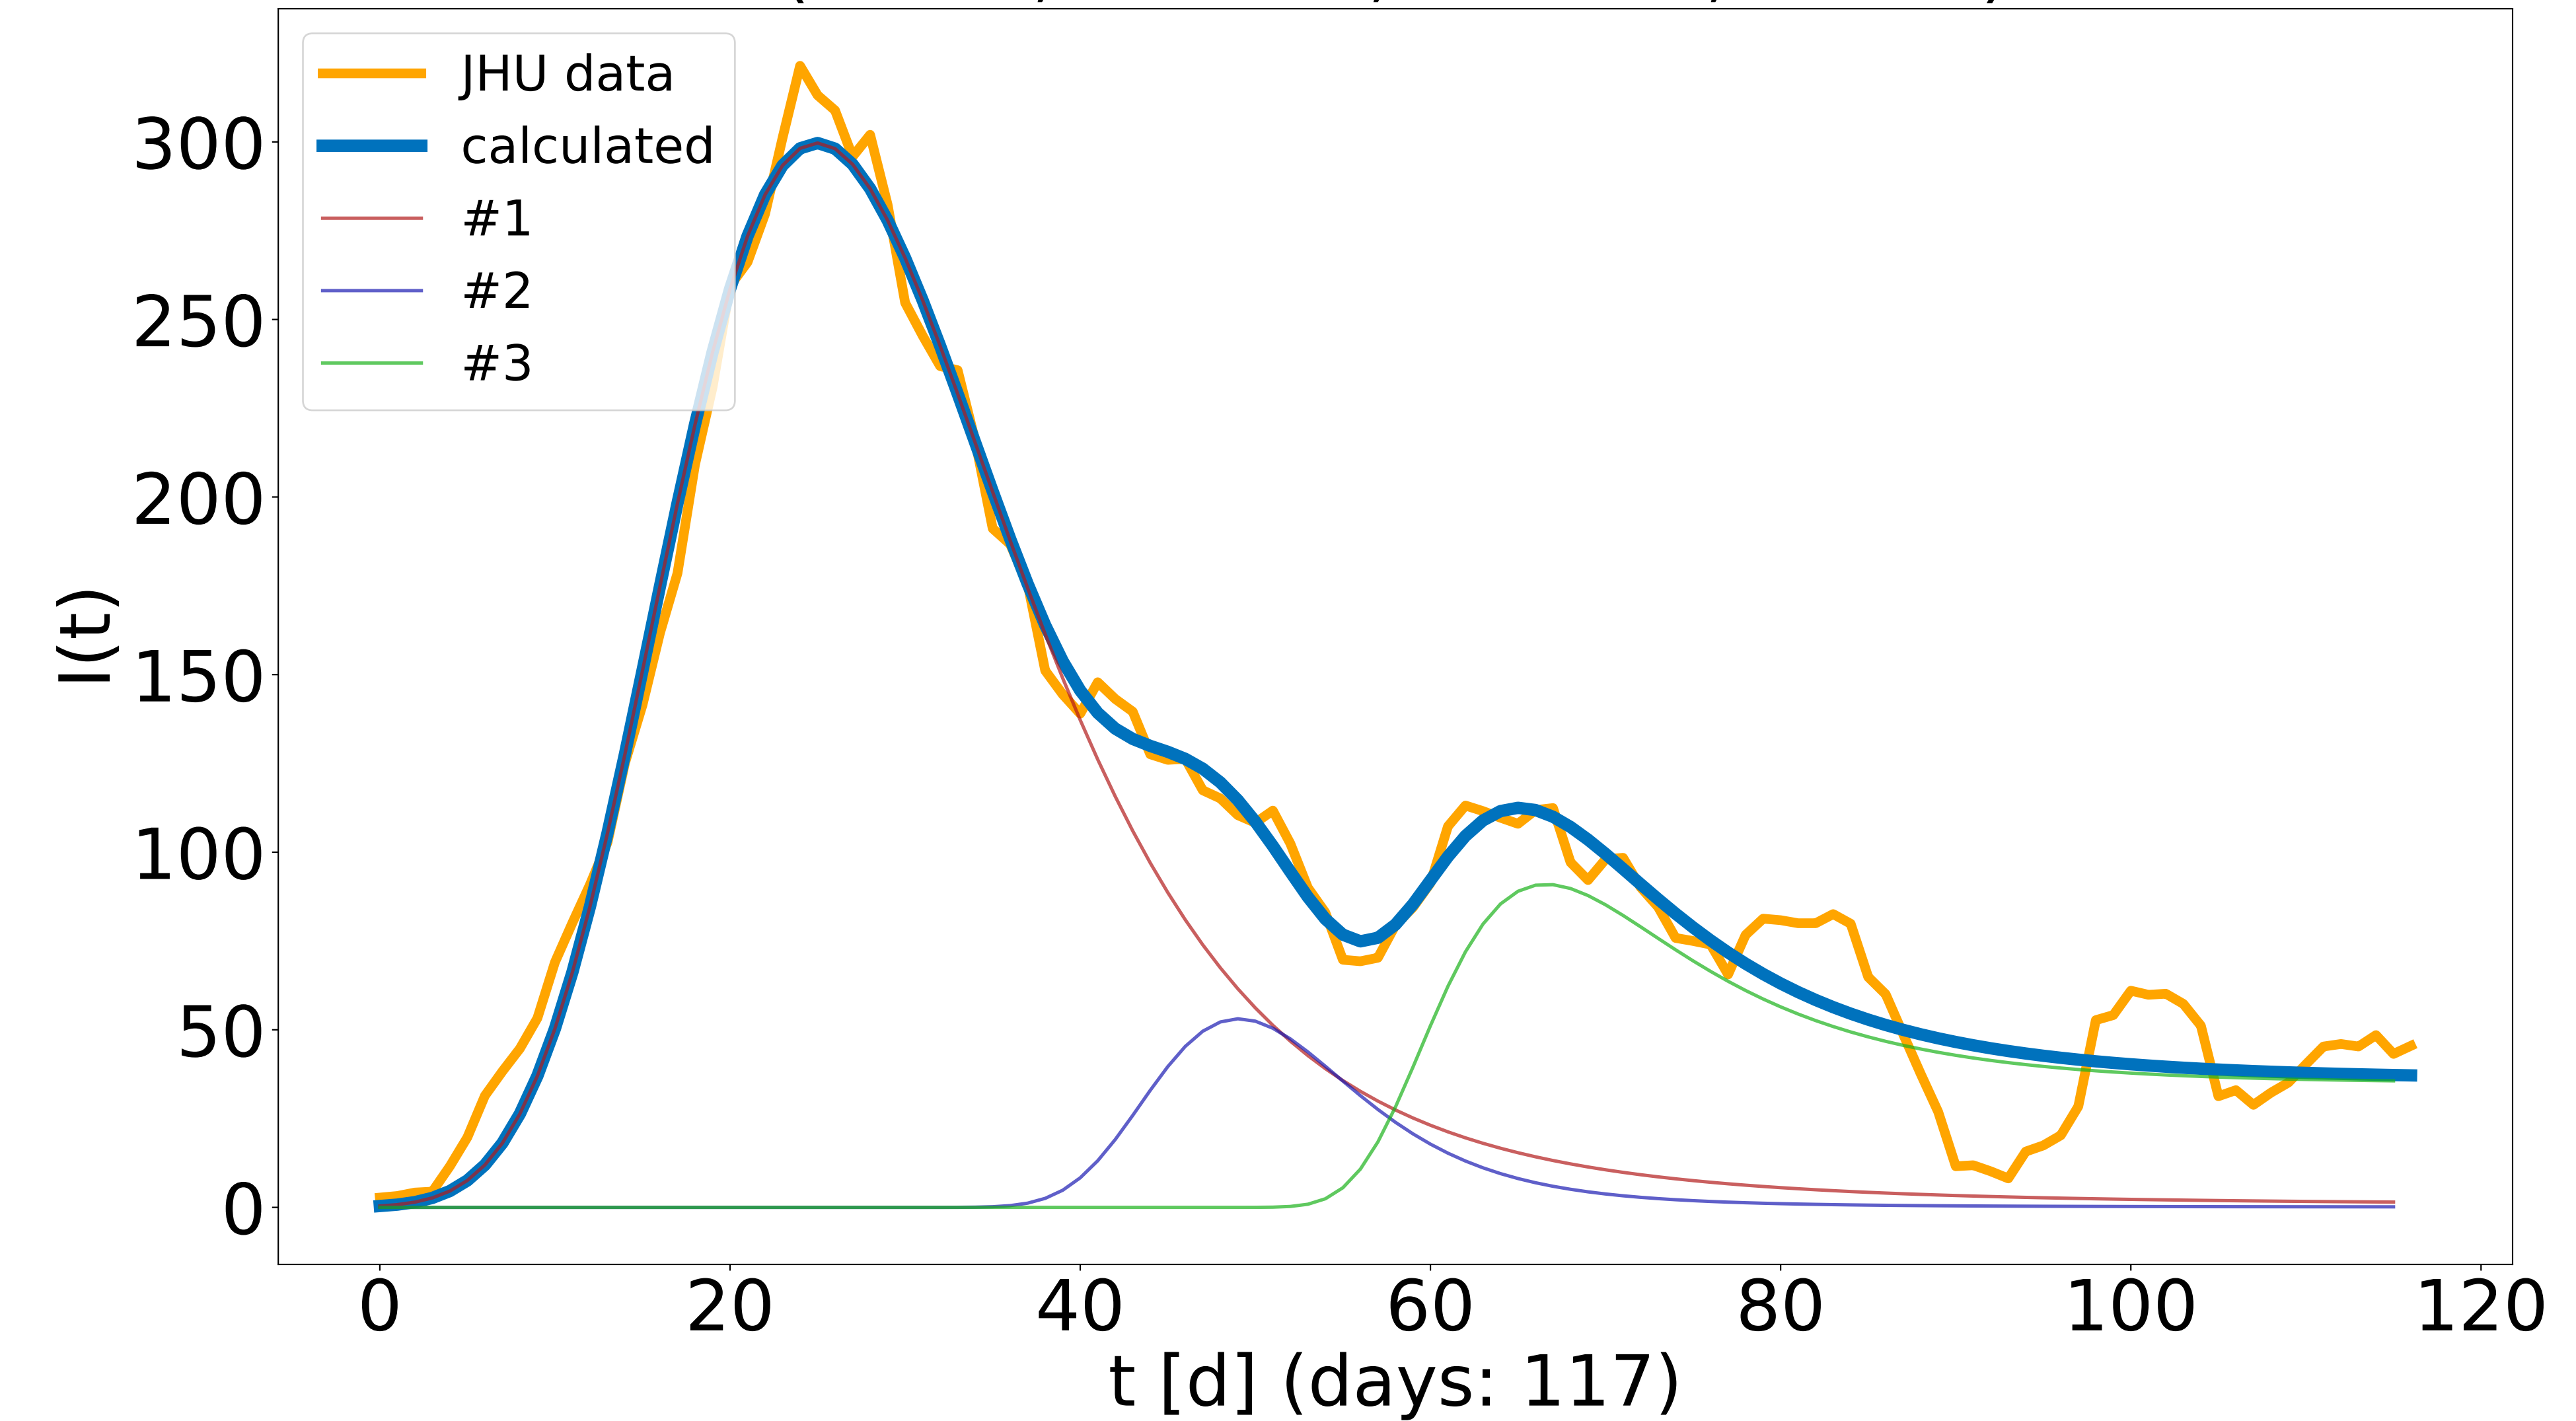



Wayne, Michigan, US, Wayne ( $R^2 = 0.794$ )  
(i: 0.1, a: 1.072, b: 0.045, t: 1.0)  
(i: 0.1, a: 0.647, b: 0.035, t: 20.9)  
(i: 71.6, a: 2.0, b: 0.602, t: 41.1)

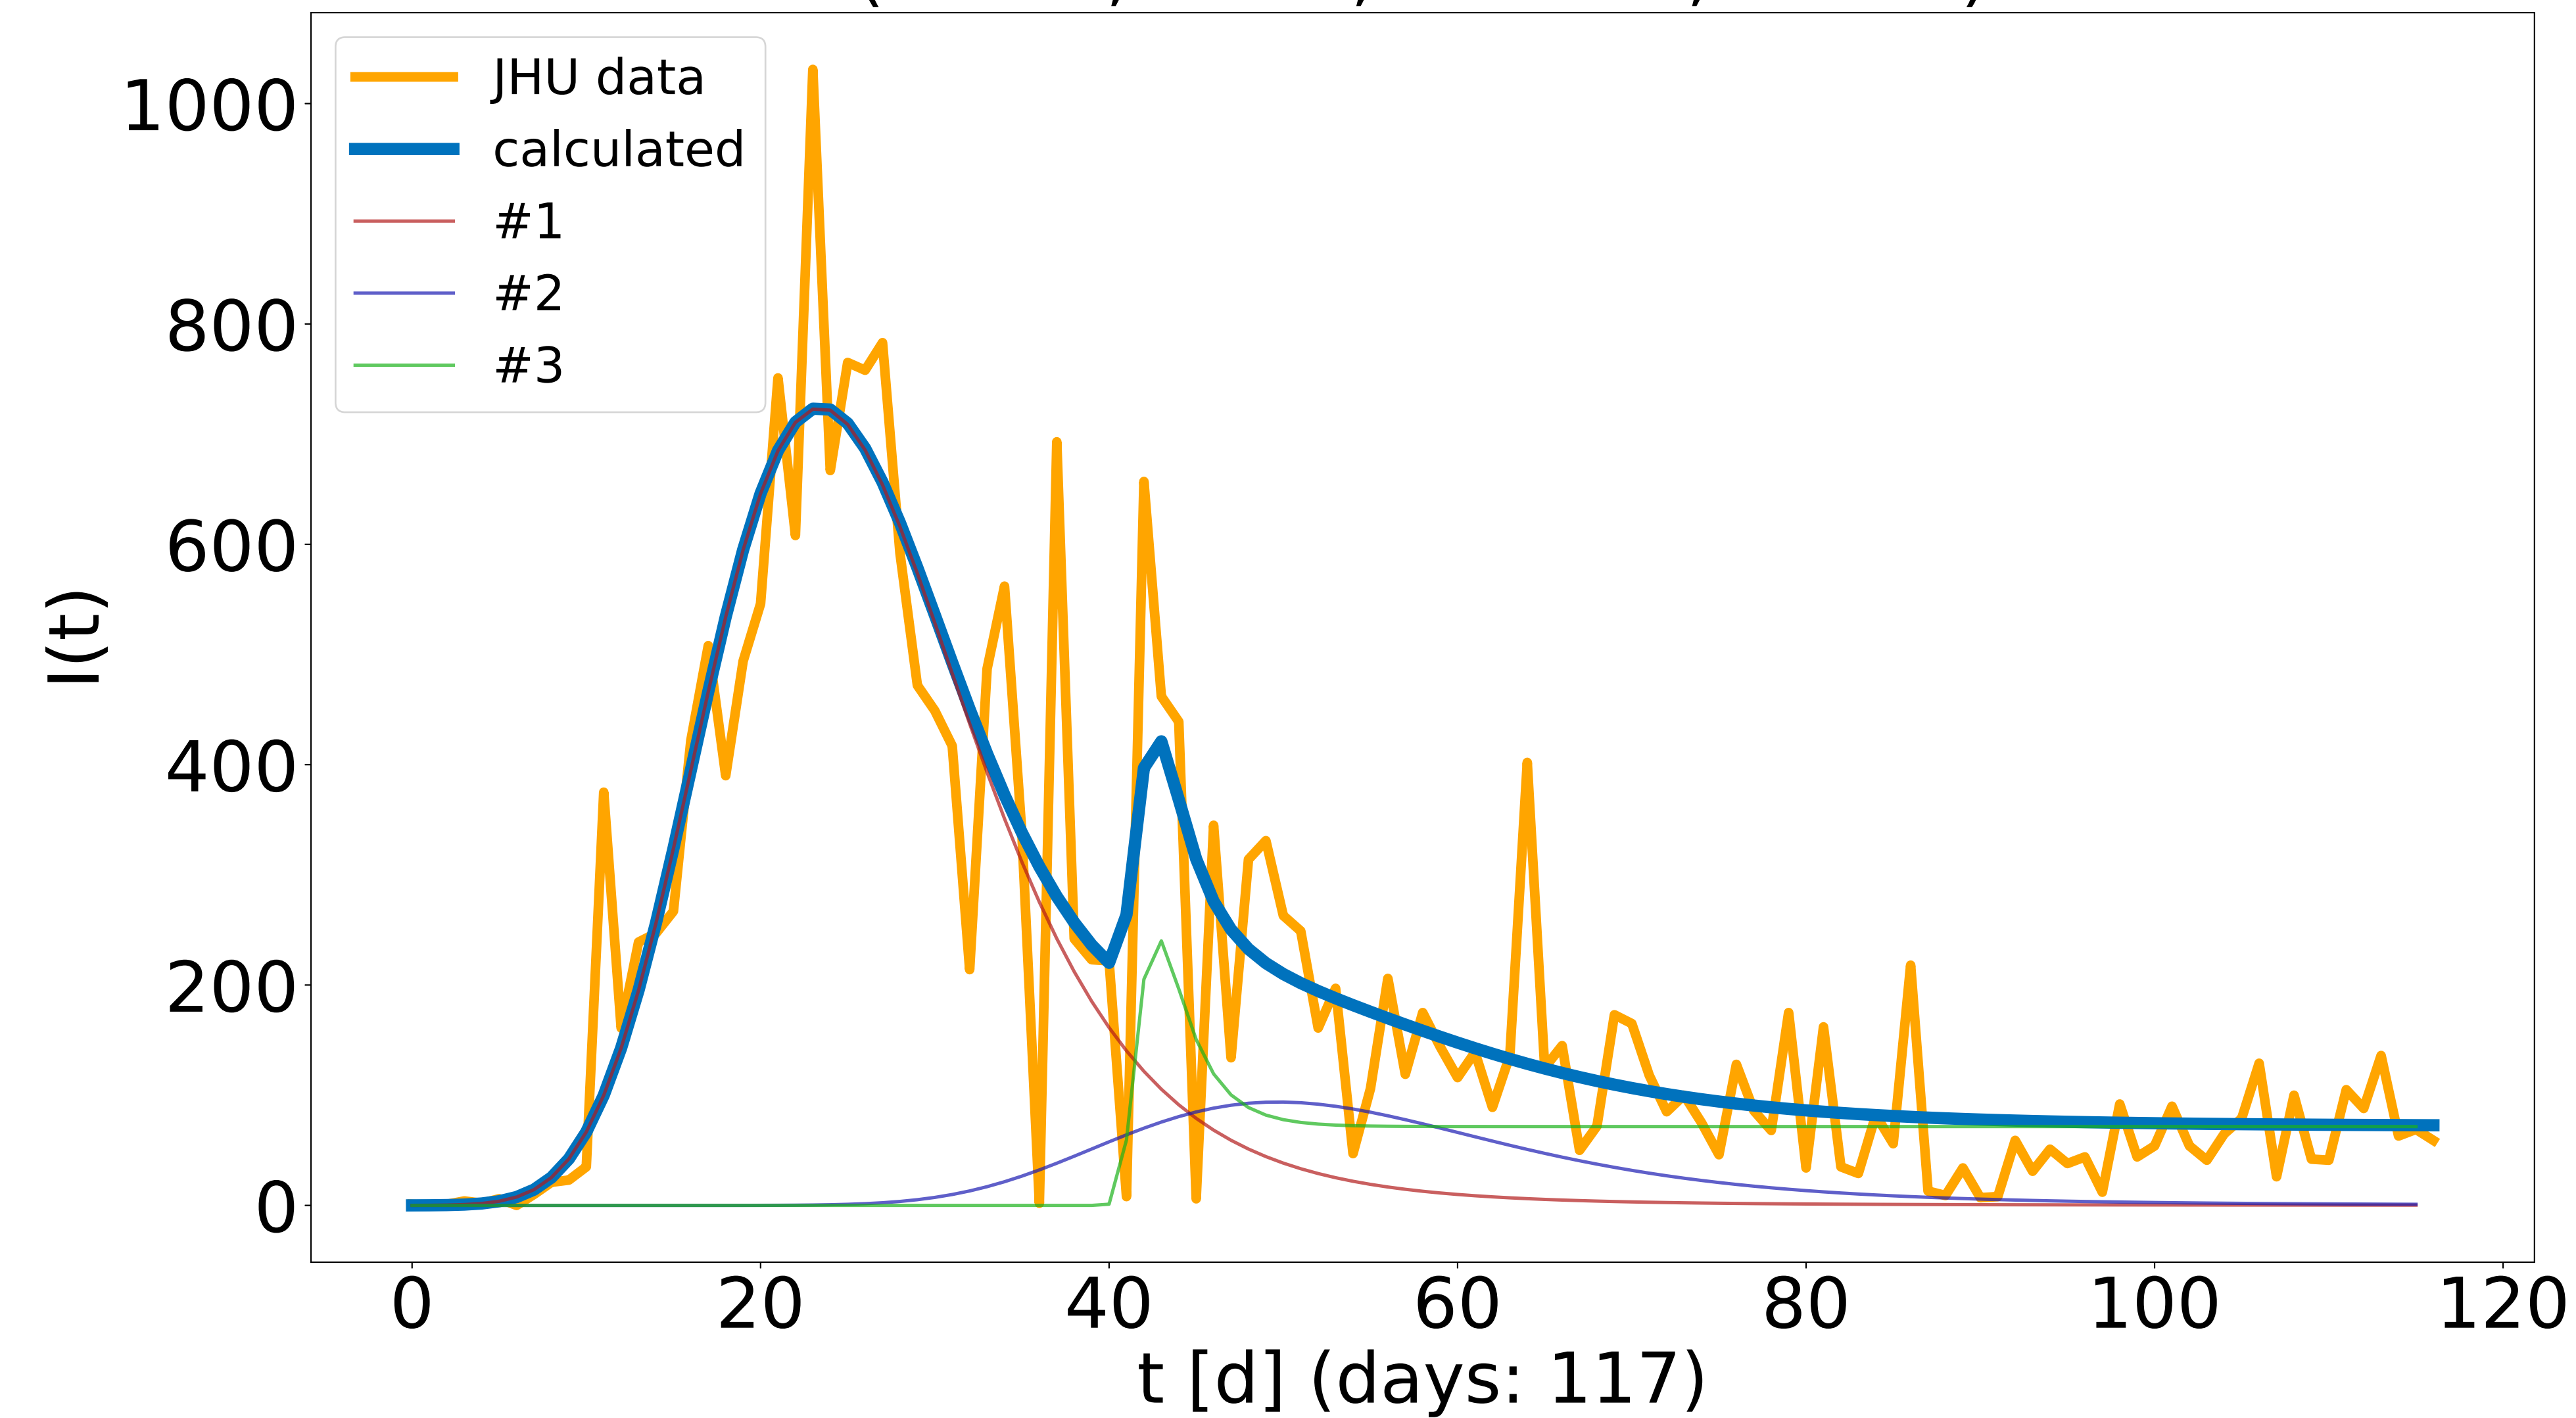

Wayne, Michigan, US, Wayne ( $R^2 = 0.979$ )  
(i: 0.2, a: 1.004, b: 0.045, t: 1.0)  
(i: 57.1, a: 0.31, b: 0.091, t: 36.0)  
(i: 26.0, a: 0.002, b: 0.186, t: 123.7)

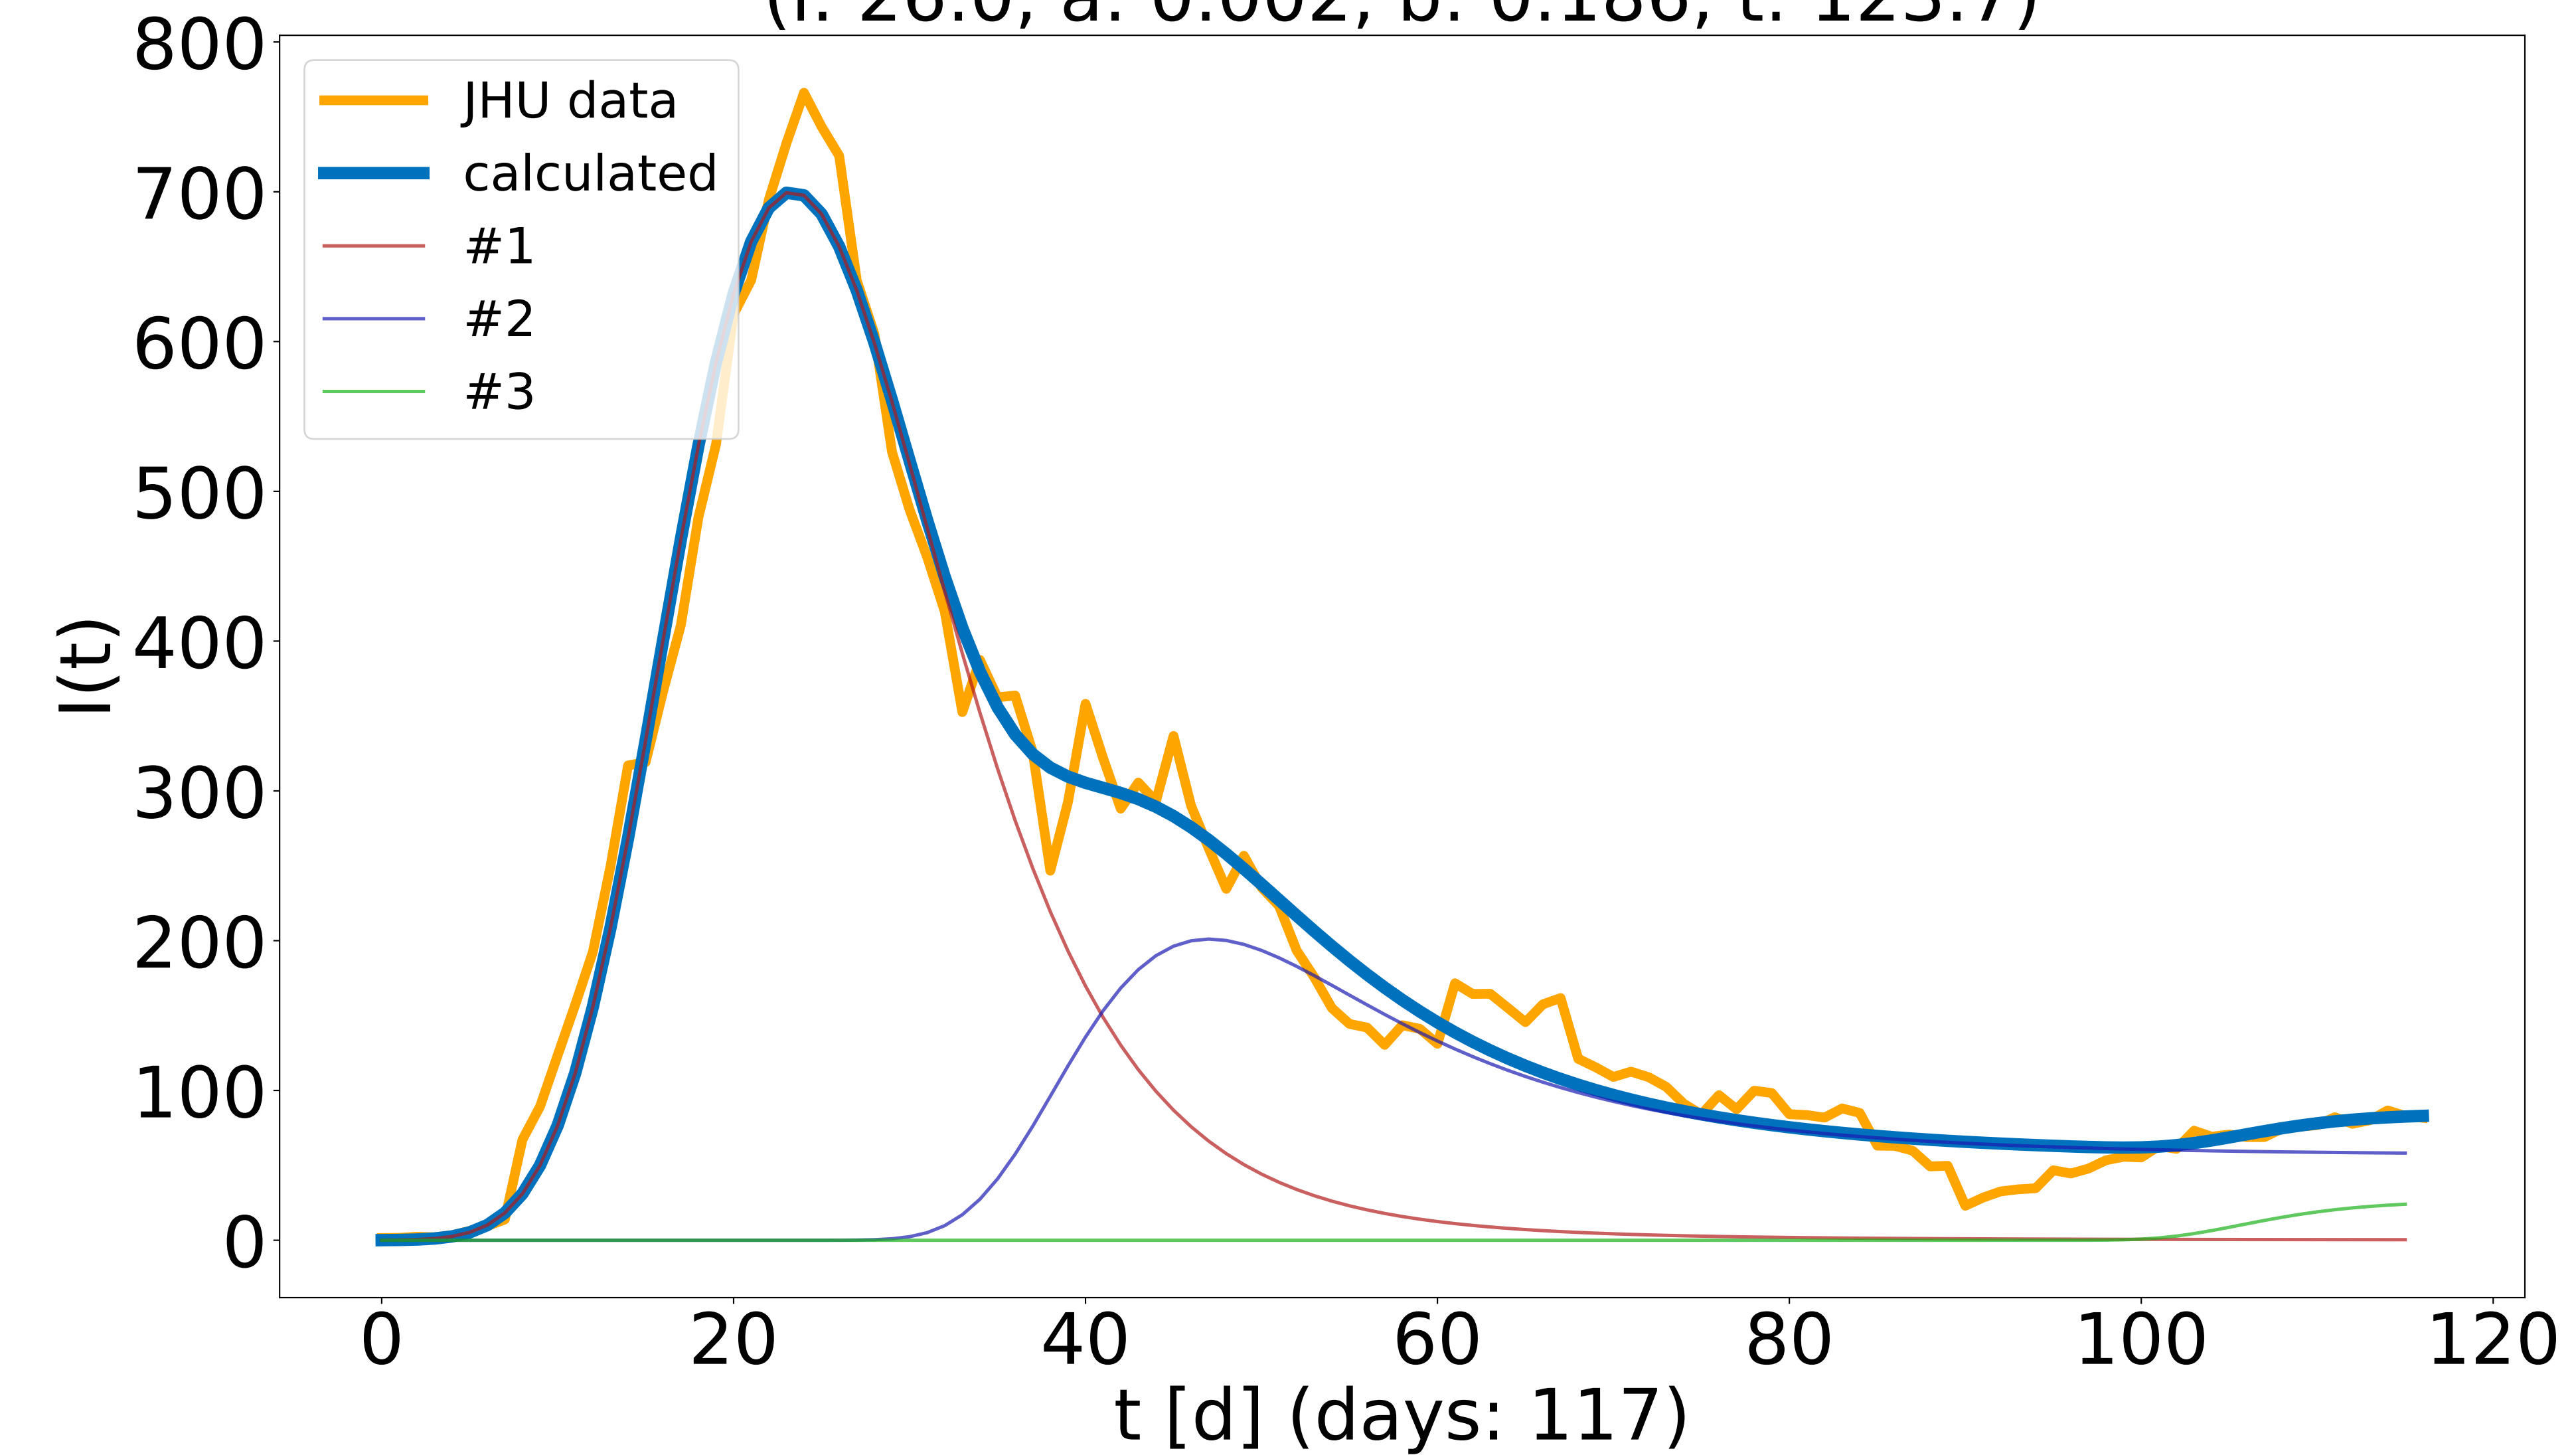



Hennepin, Minnesota, US, Hennepin ( $R^2 = 0.813$ )

(i: 11.1, a: 0.107, b: 0.022, t: 13.6)

(i: 0.1, a: 0.555, b: 0.027, t: 29.9)

(i: 2.7, a: 0.636, b: 0.073, t: 97.1)

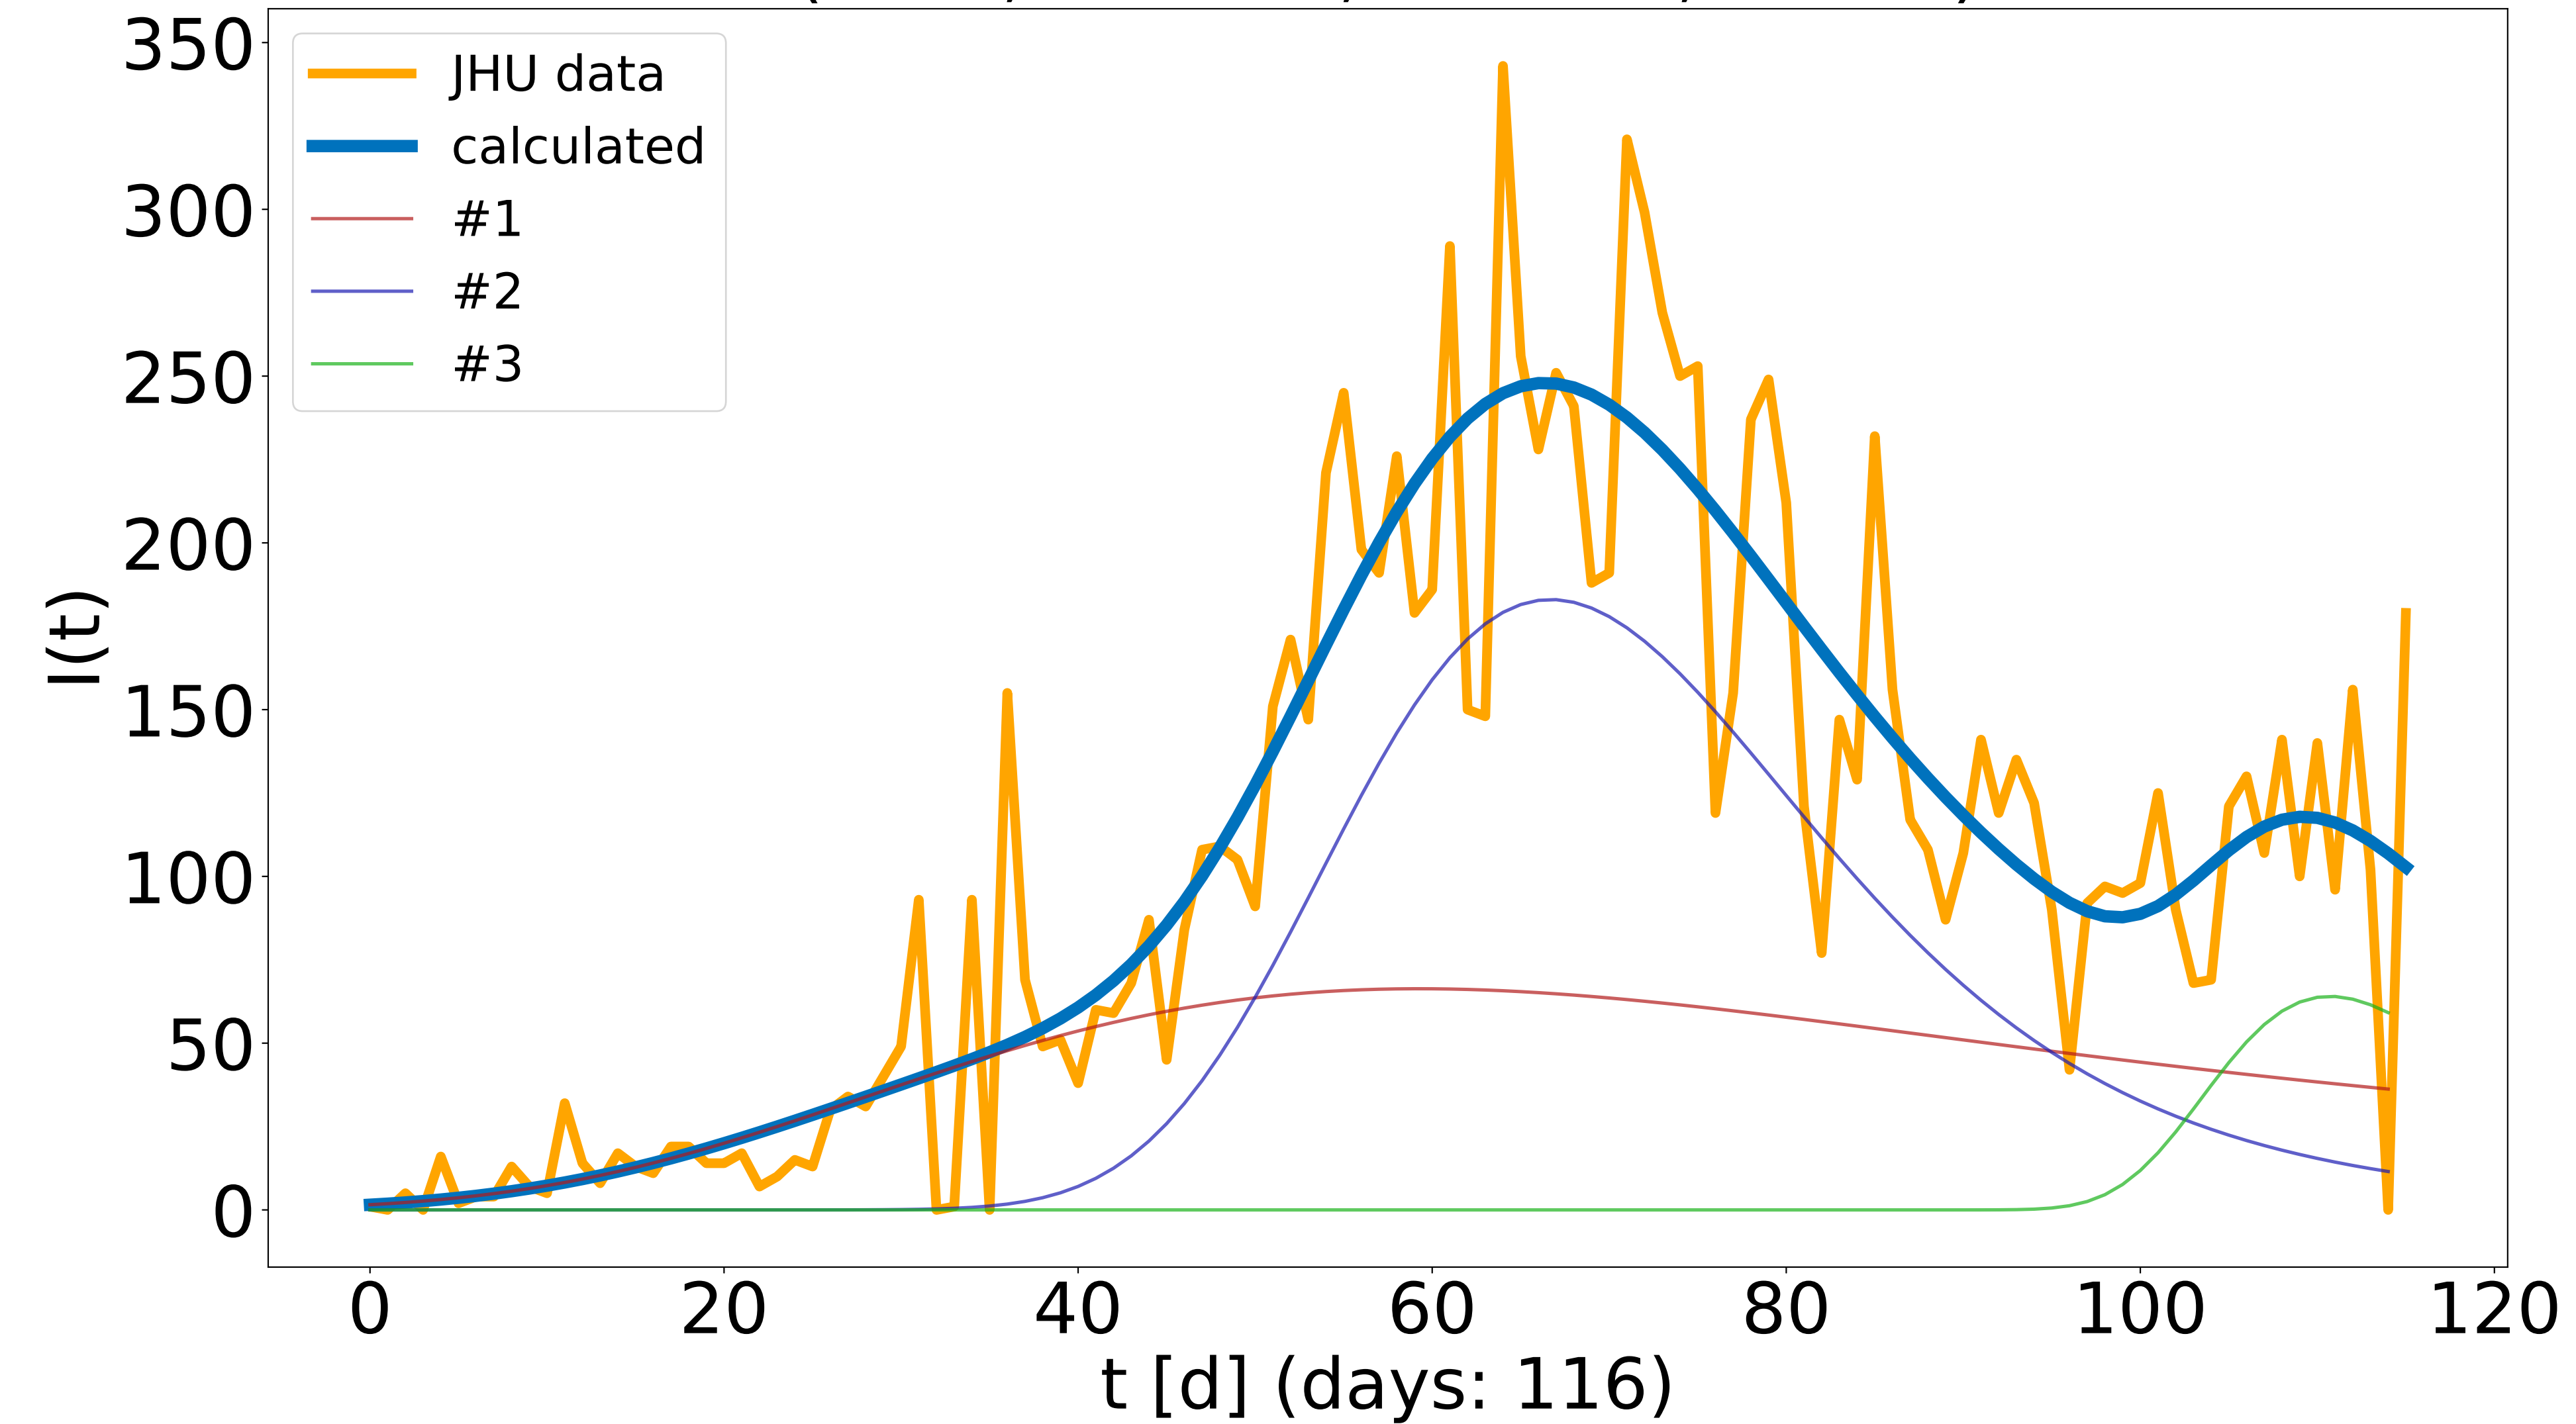

Hennepin, Minnesota, US, Hennepin ( $R^2 = 0.987$ )

(i: 3.4, a: 0.153, b: 0.019, t: 4.3)

(i: 0.1, a: 0.54, b: 0.026, t: 29.3)

(i: 0.1, a: 0.748, b: 0.042, t: 88.4)

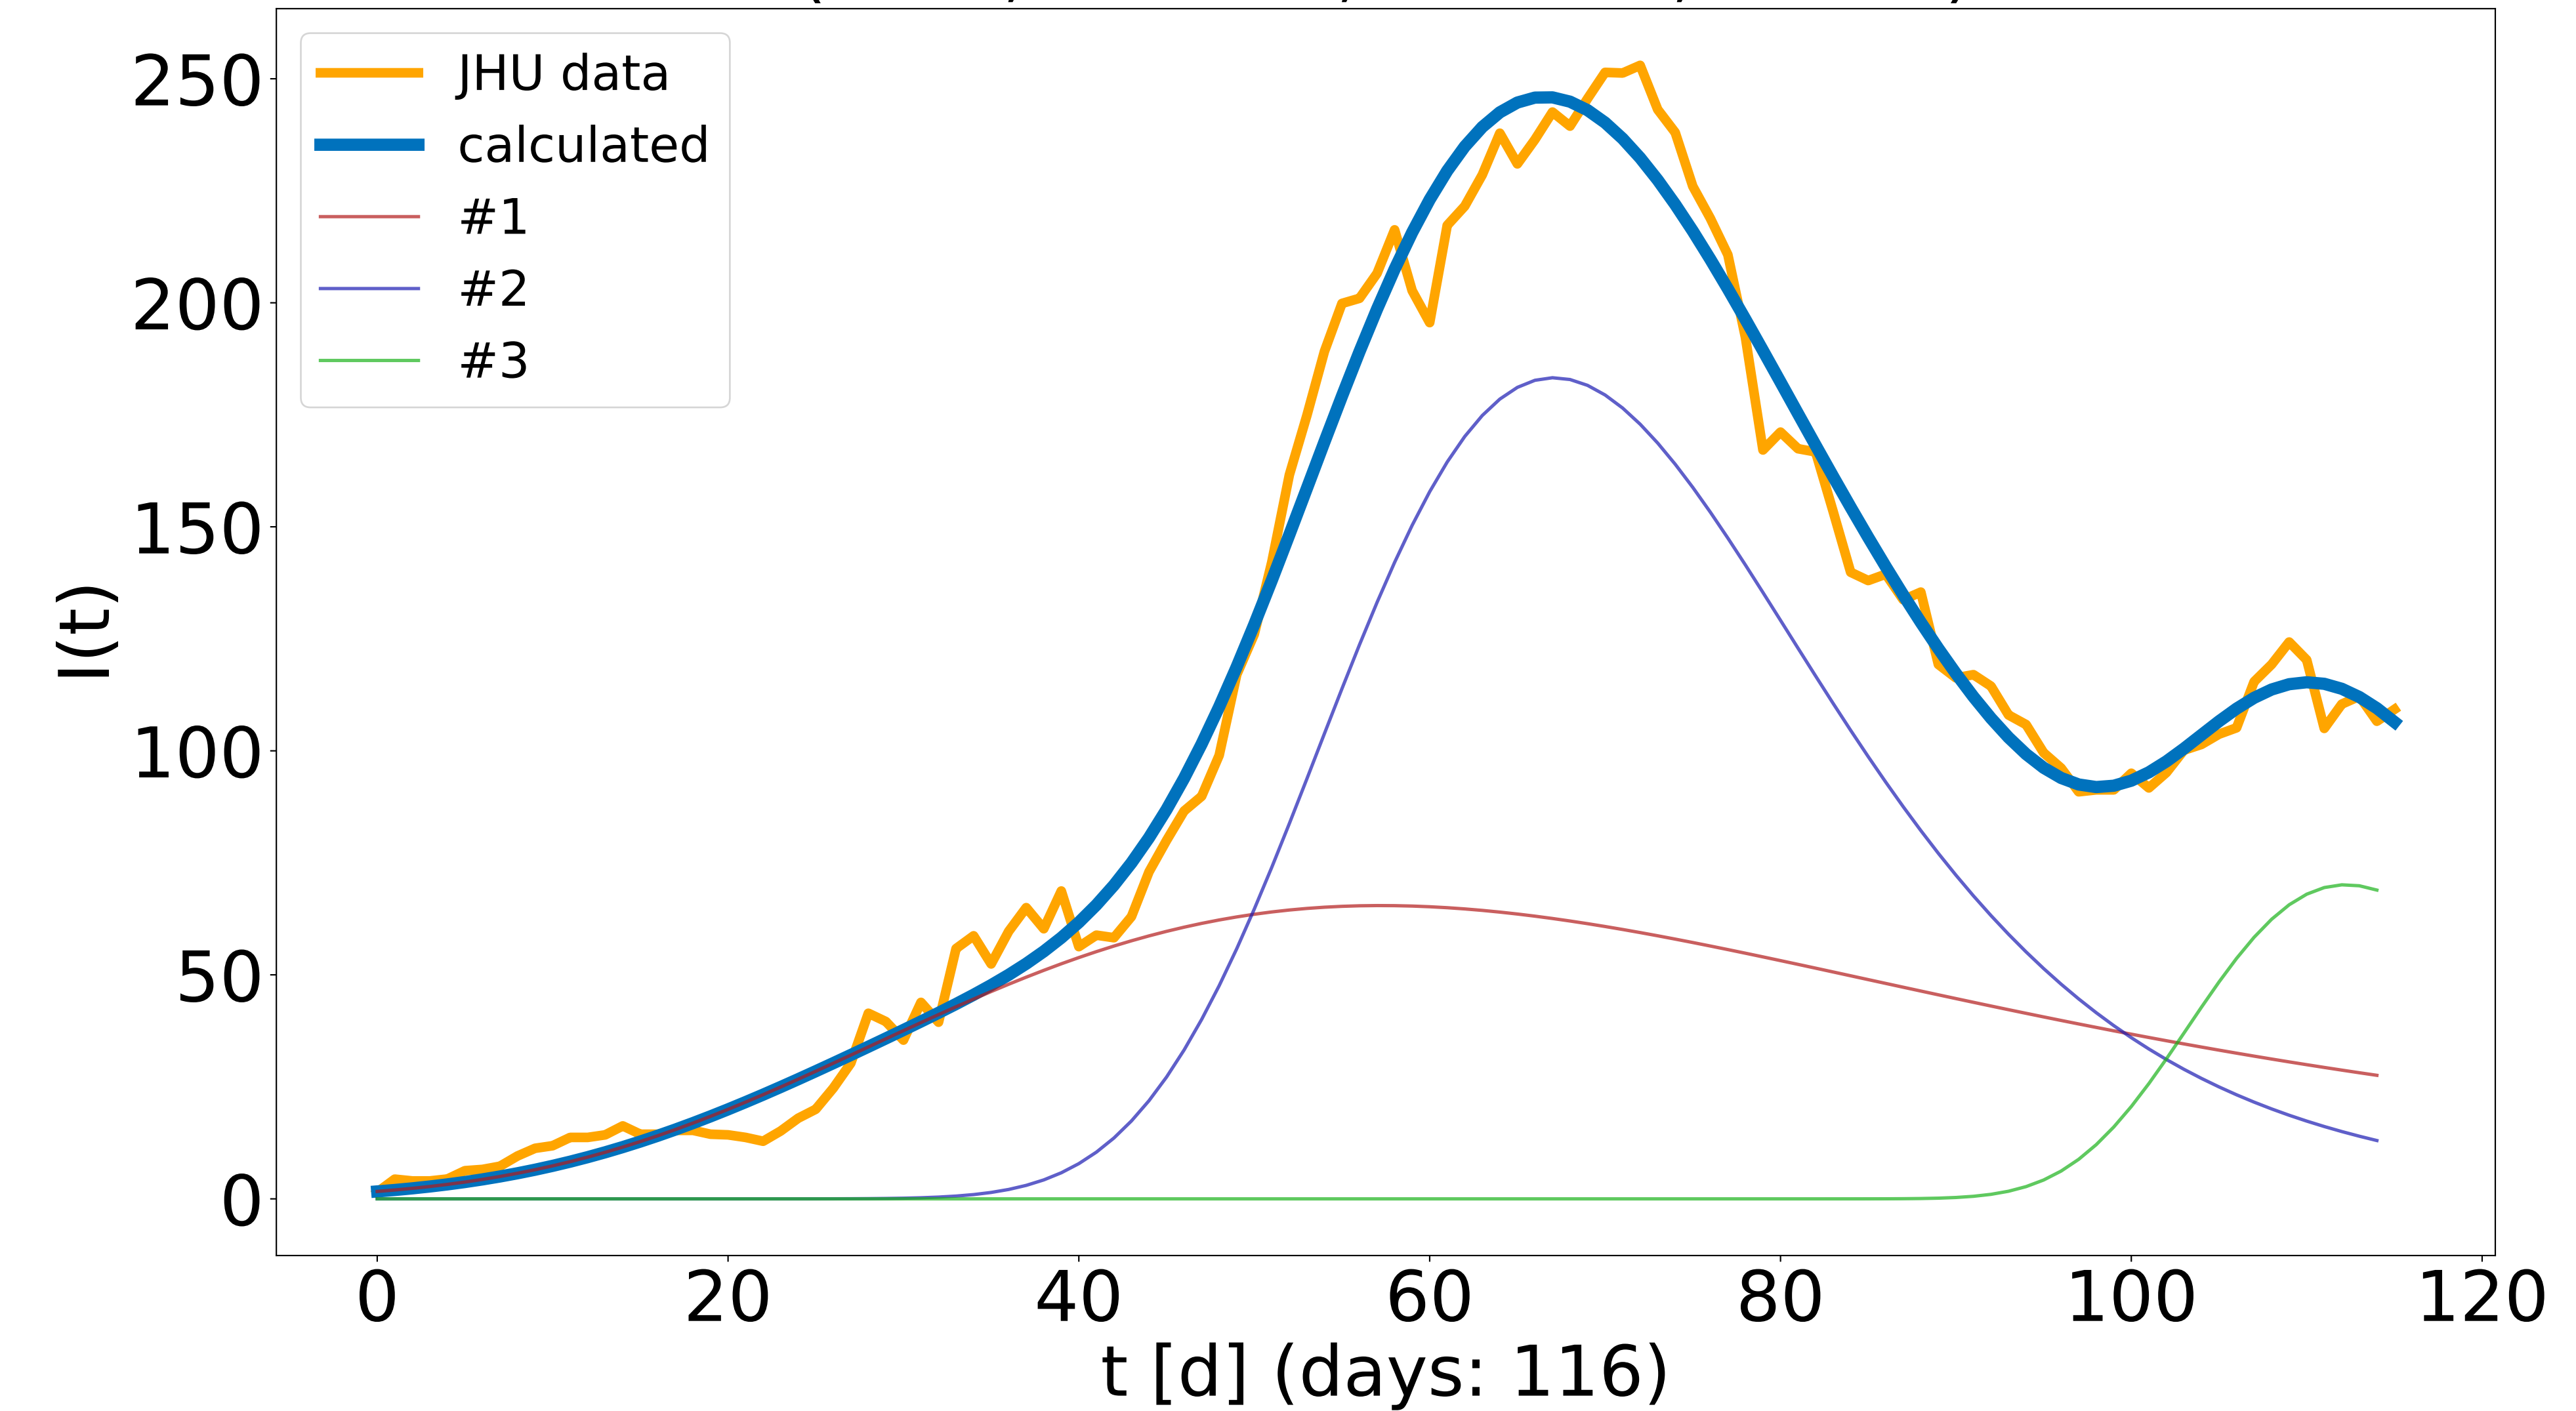

Buchanan, Missouri, US, Buchanan ( $R^2 = 0.66$ )

(i: 3.5, a: 2.0, b: 0.257, t: 32.9)

(i: 0.1, a: 1.039, b: 0.08, t: 43.5)

(i: 0.1, a: 2.0, b: 0.193, t: 87.9)

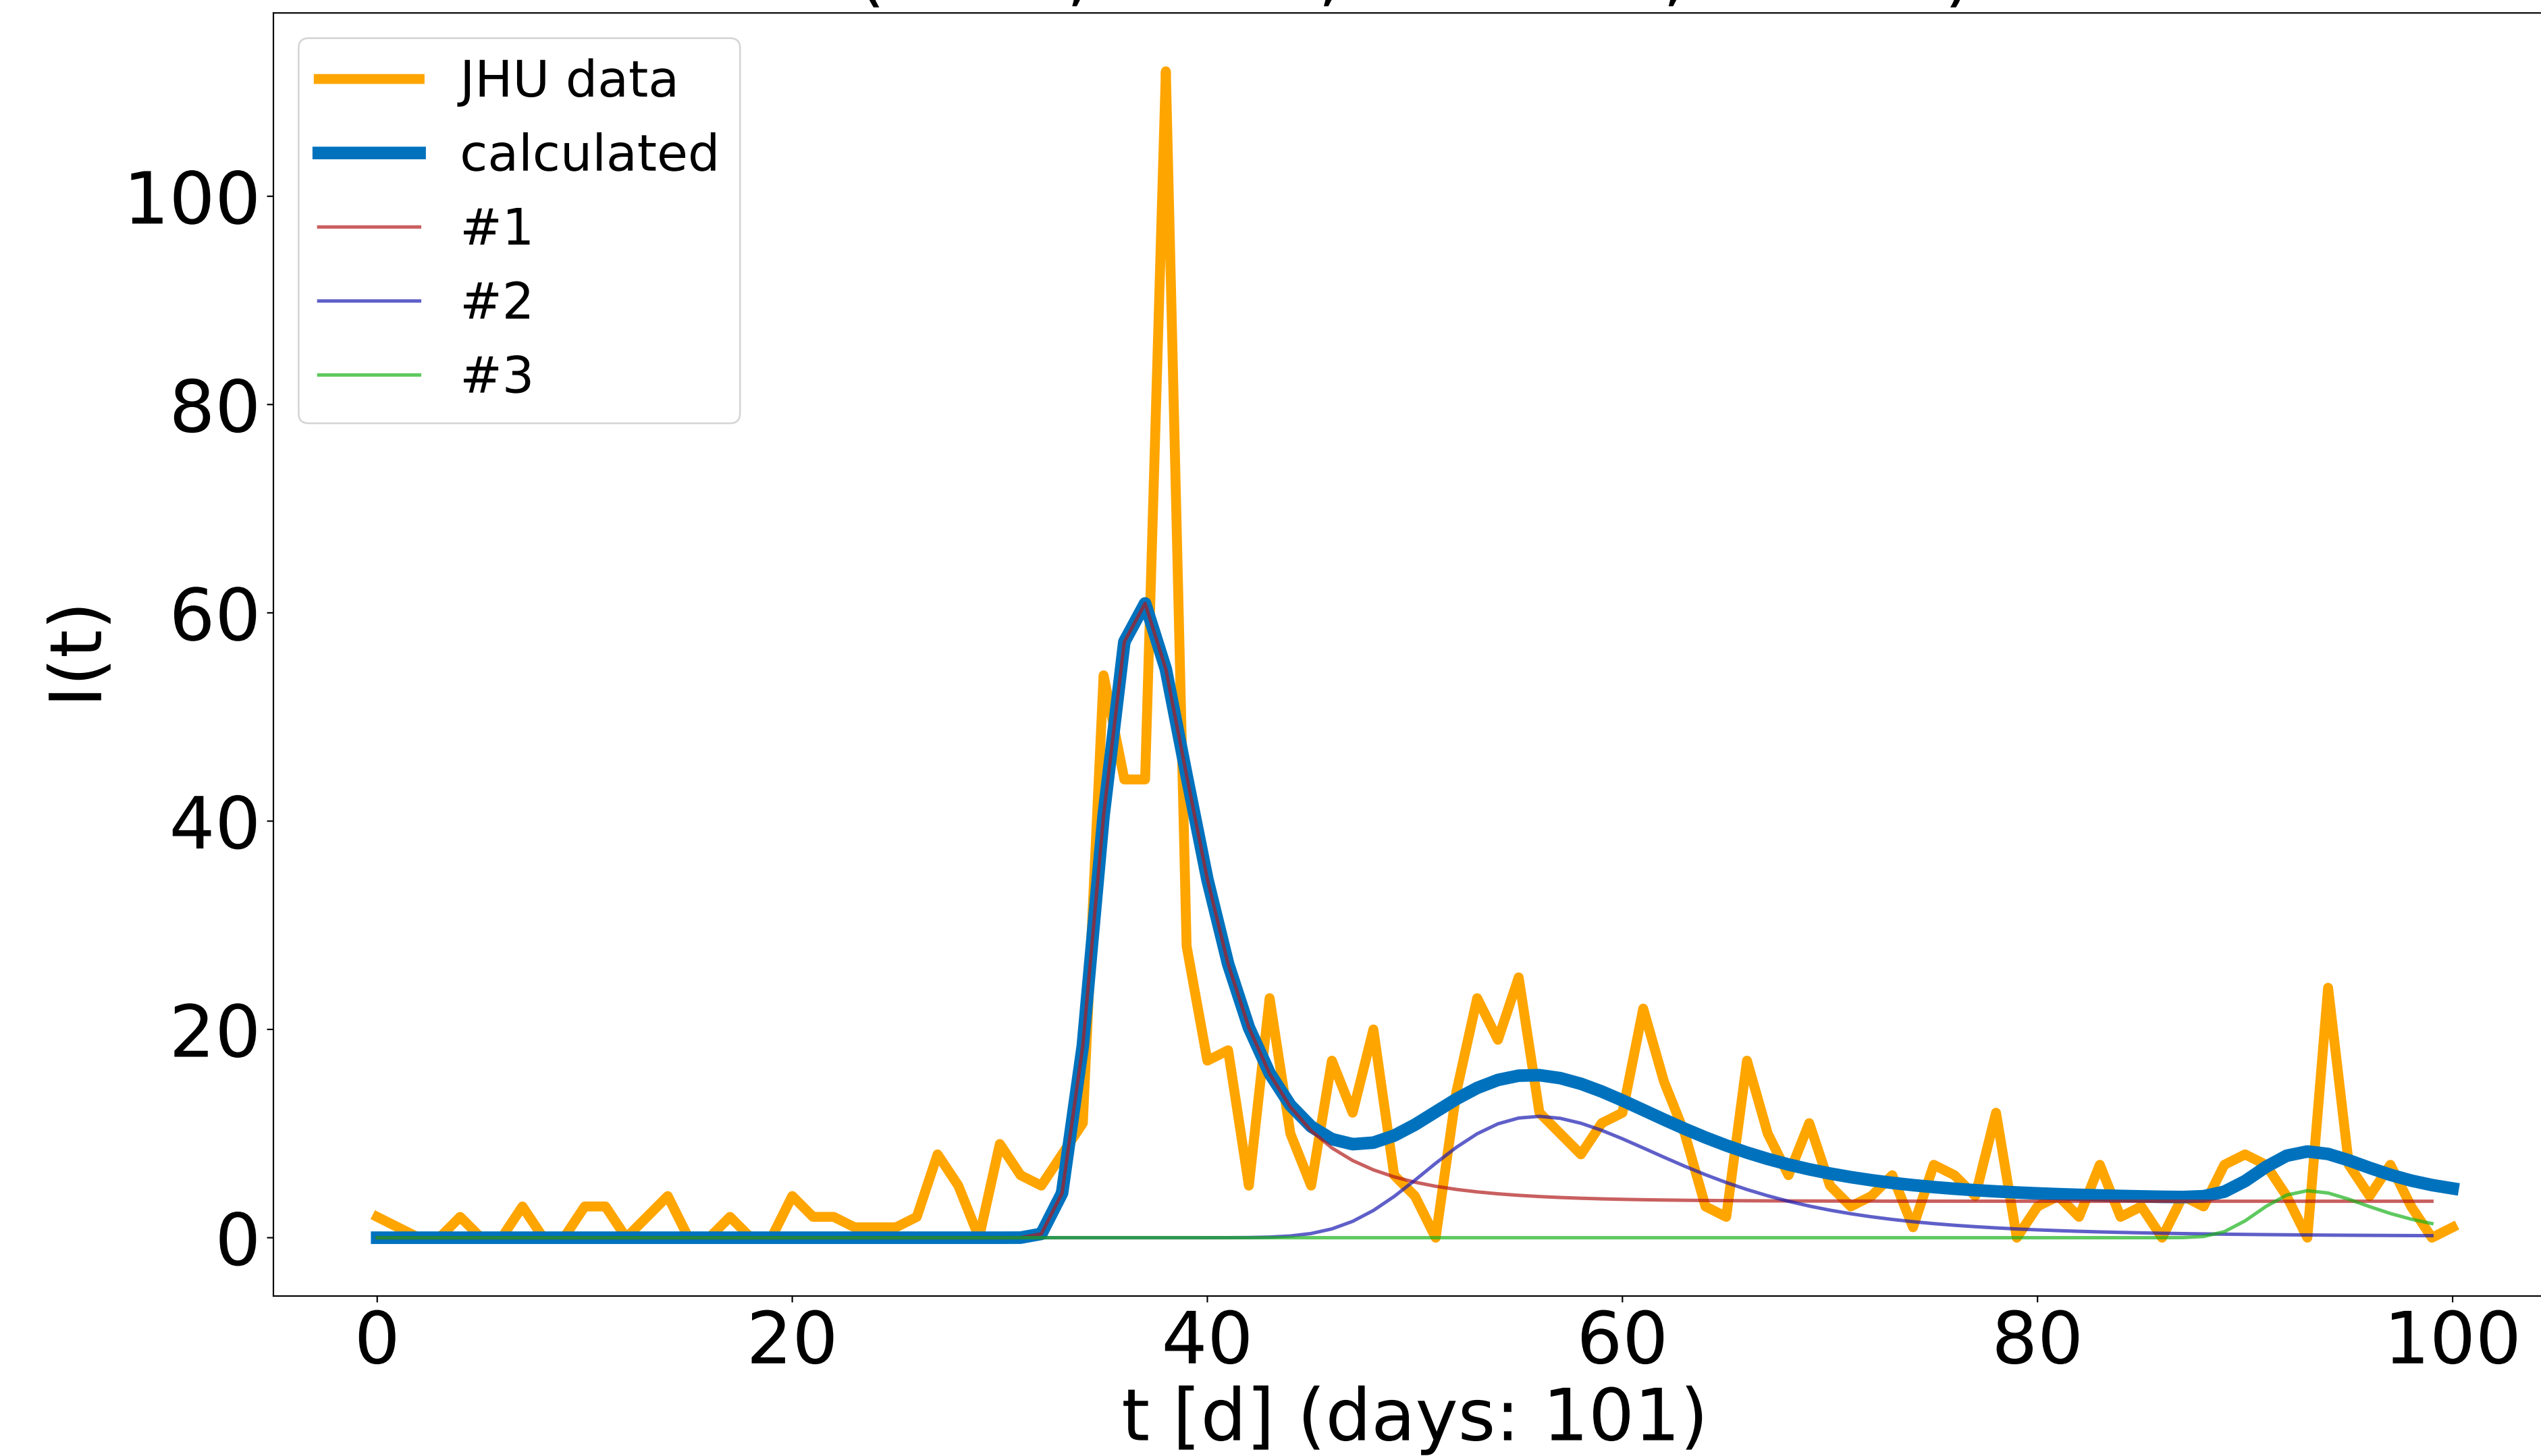

Buchanan, Missouri, US, Buchanan ( $R^2 = 0.975$ )

(i: 0.2, a: 2.0, b: 0.131, t: 29.2)

(i: 0.1, a: 1.056, b: 0.084, t: 43.8)

(i: 4.3, a: 0.001, b: 0.048, t: 72.1)

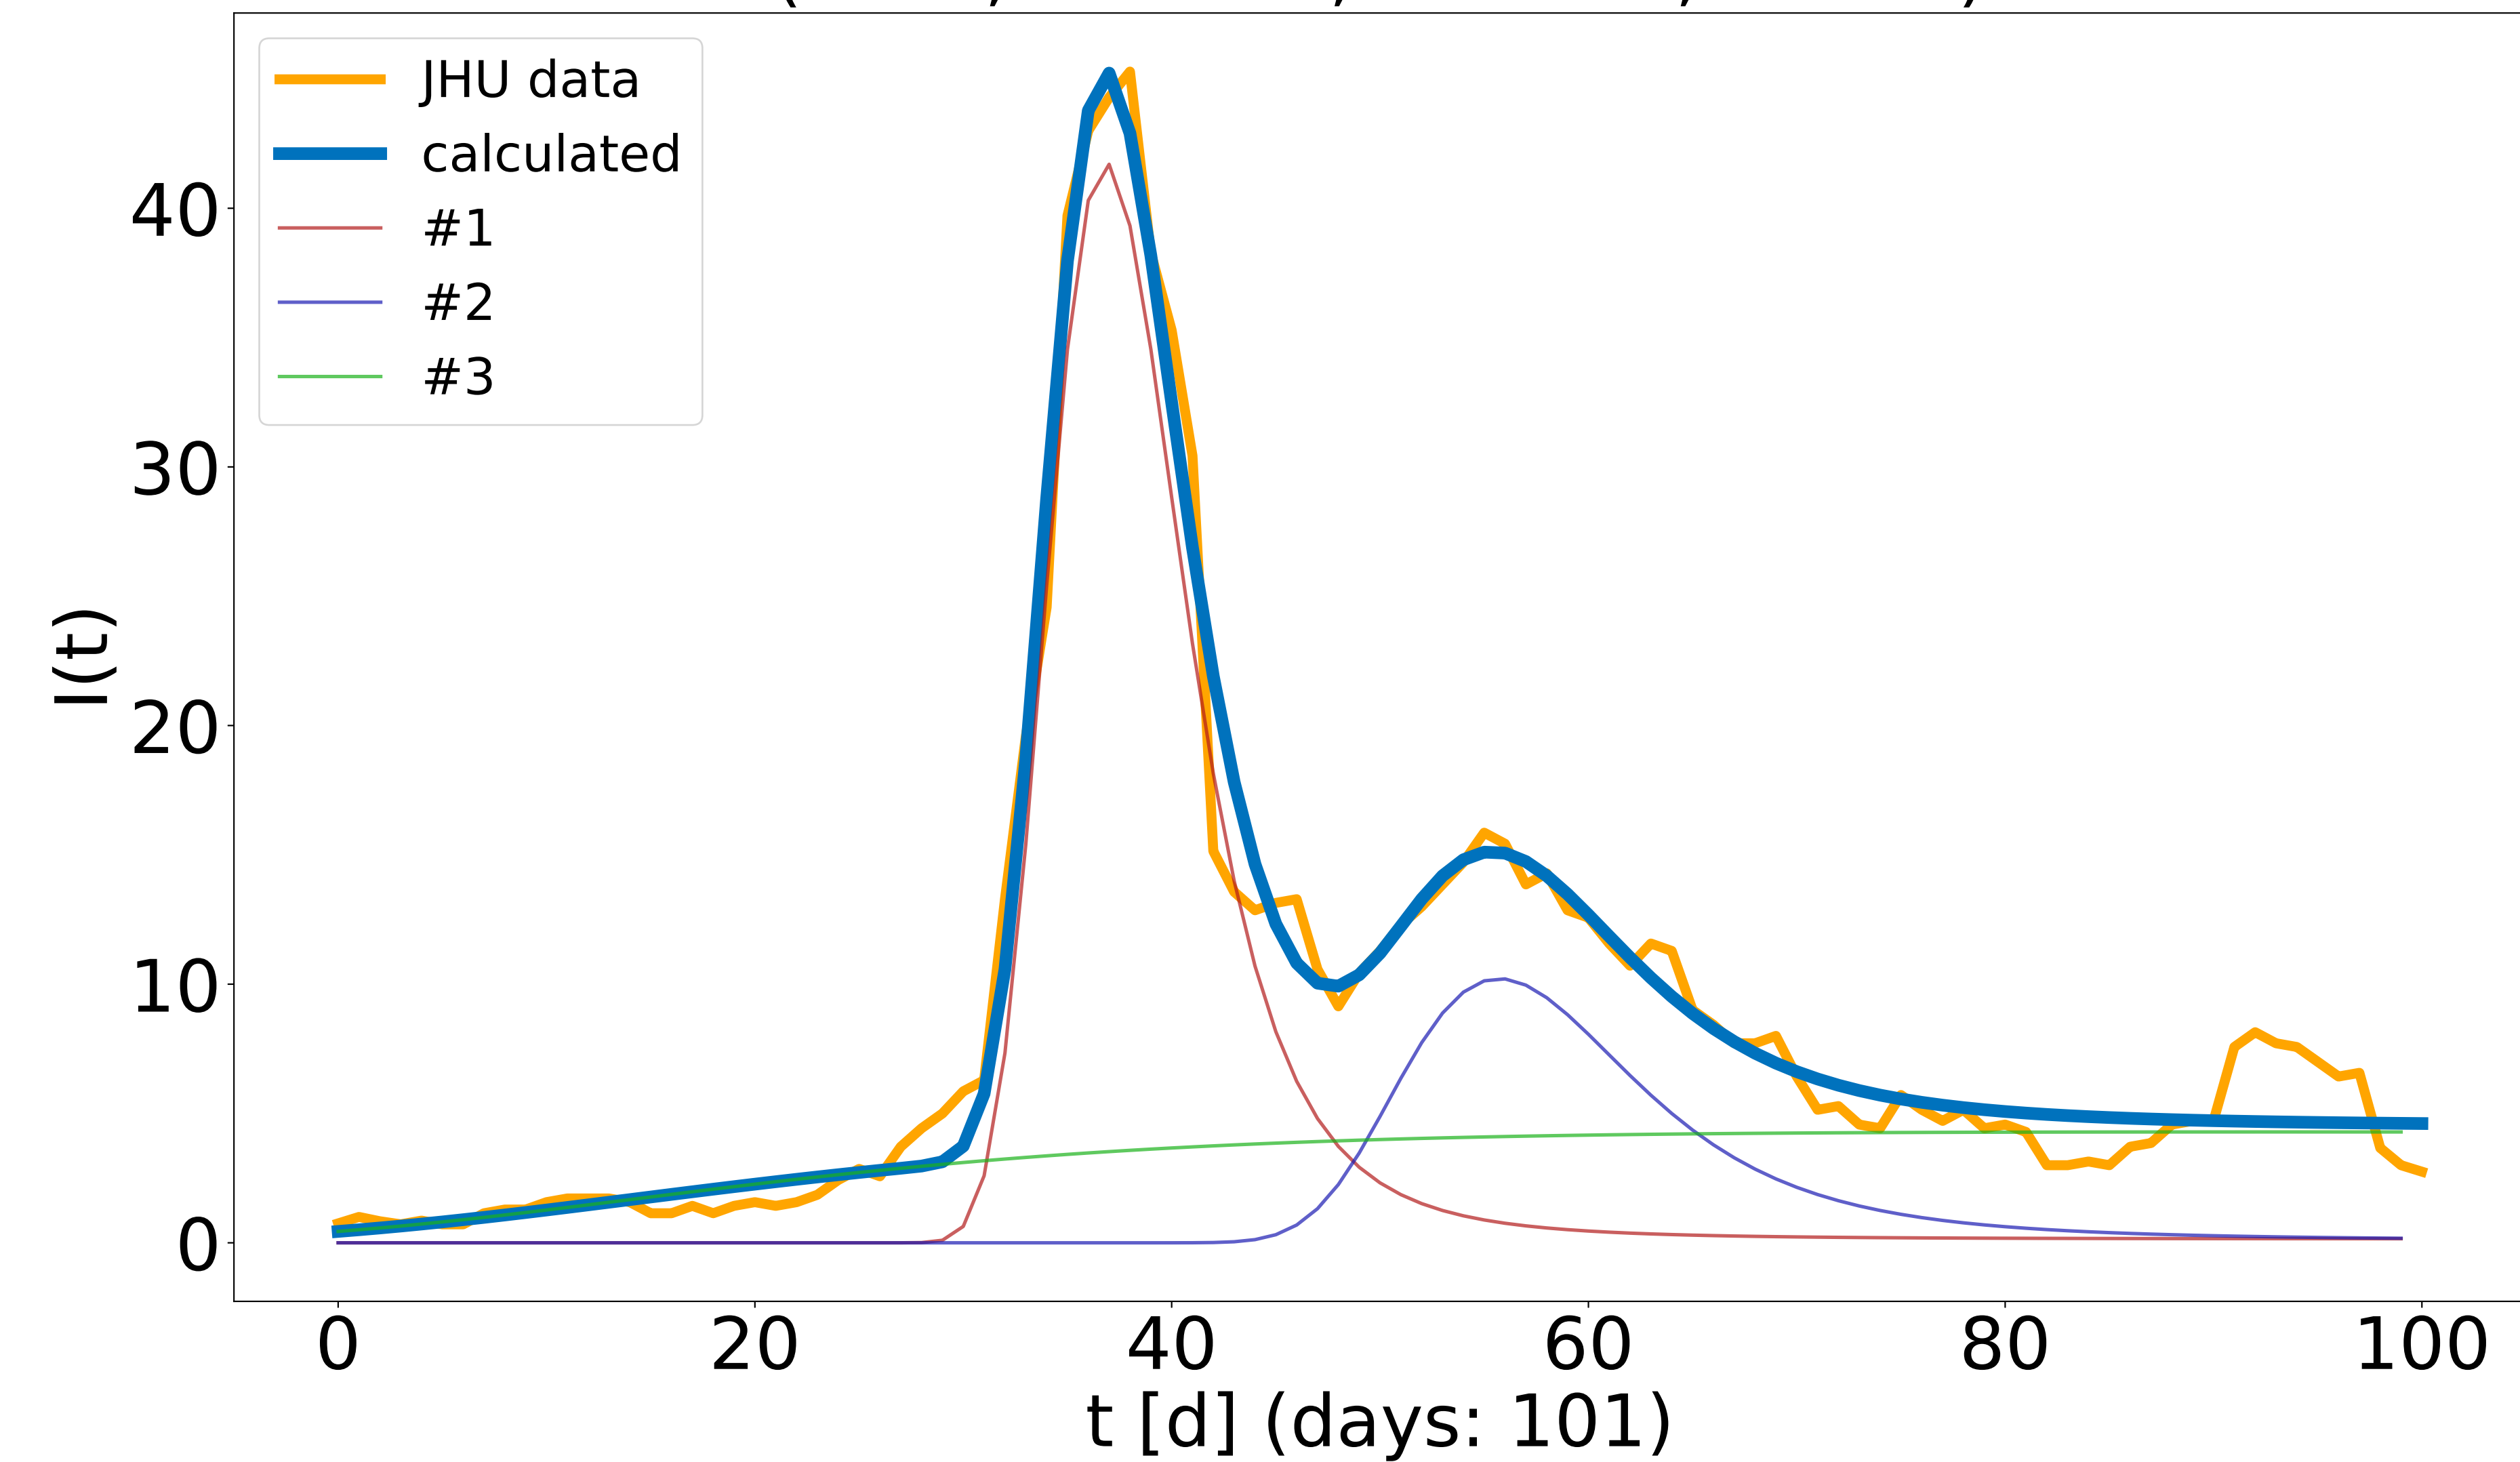

St. Louis, Missouri, US, St. Louis ( $R^2 = 0.588$ )  
(i: 0.1, a: 0.804, b: 0.042, t: 3.9)  
(i: 38.3, a: 0.179, b: 0.114, t: 43.2)  
(i: 19.9, a: 0.957, b: 0.328, t: 107.4)

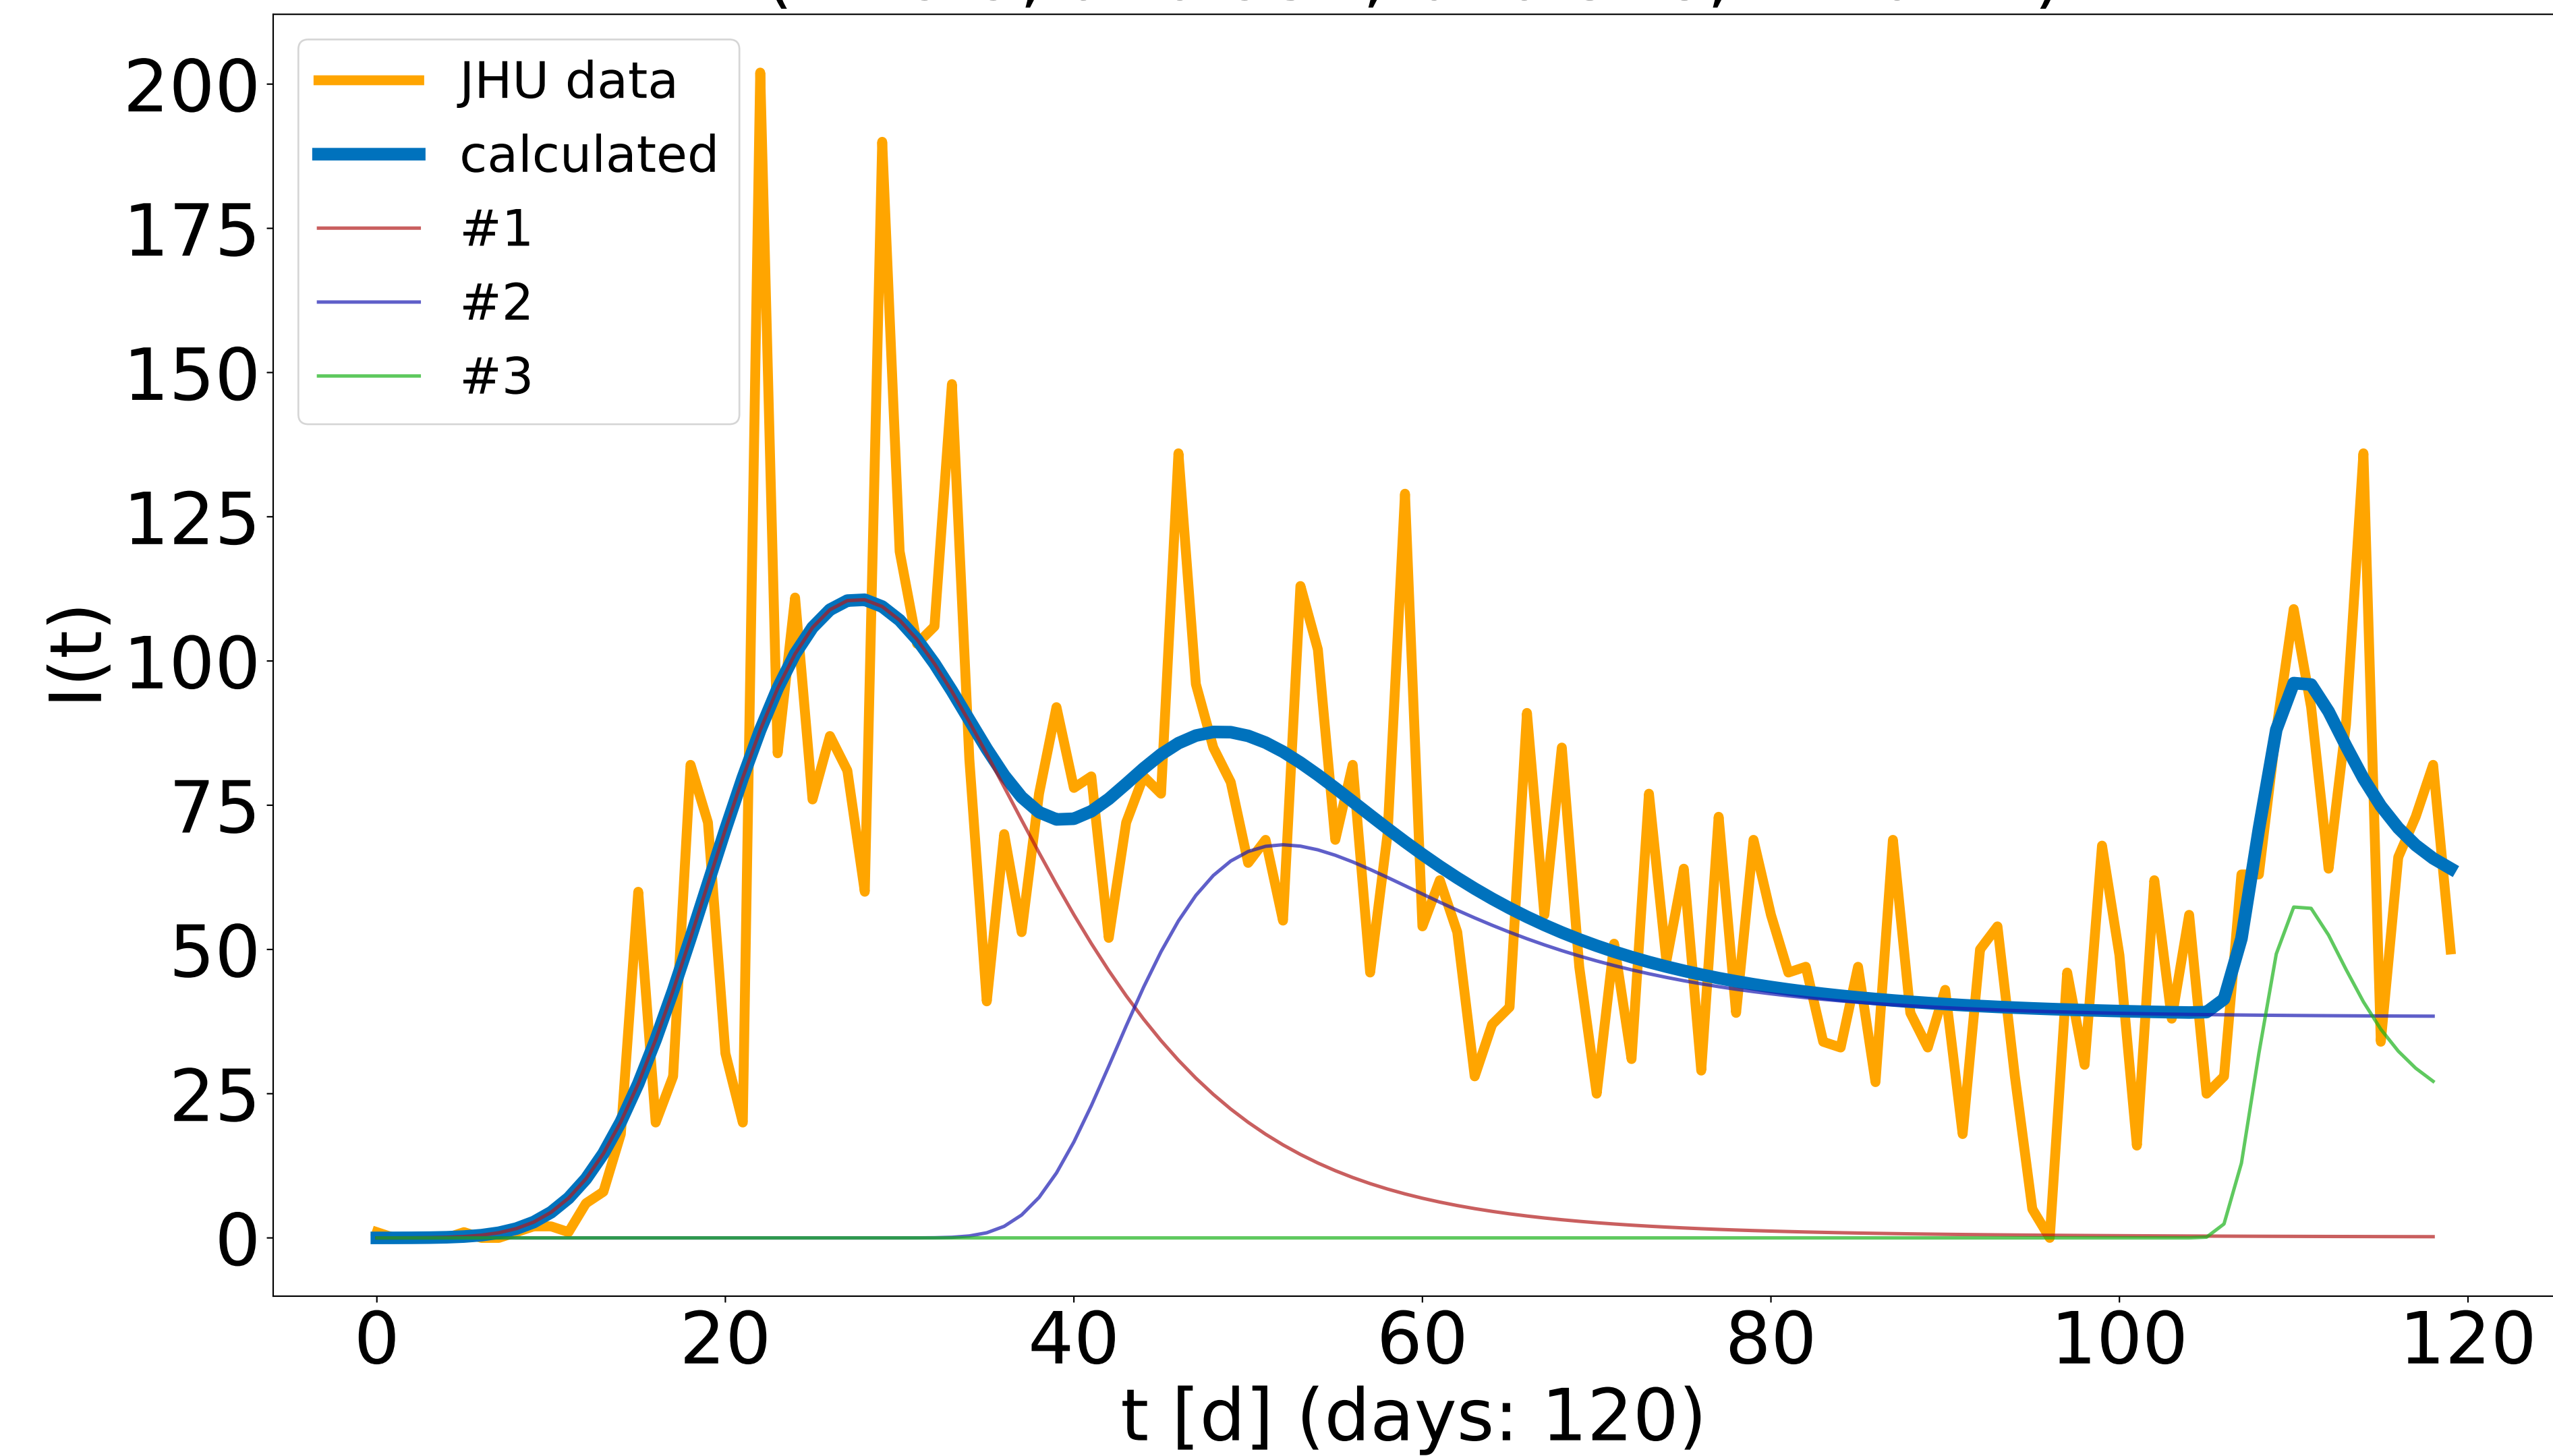

St. Louis, Missouri, US, St. Louis ( $R^2 = 0.971$ )  
(i: 0.1, a: 0.764, b: 0.04, t: 3.0)  
(i: 37.9, a: 0.162, b: 0.11, t: 43.7)  
(i: 2.1, a: 1.011, b: 0.119, t: 103.5)

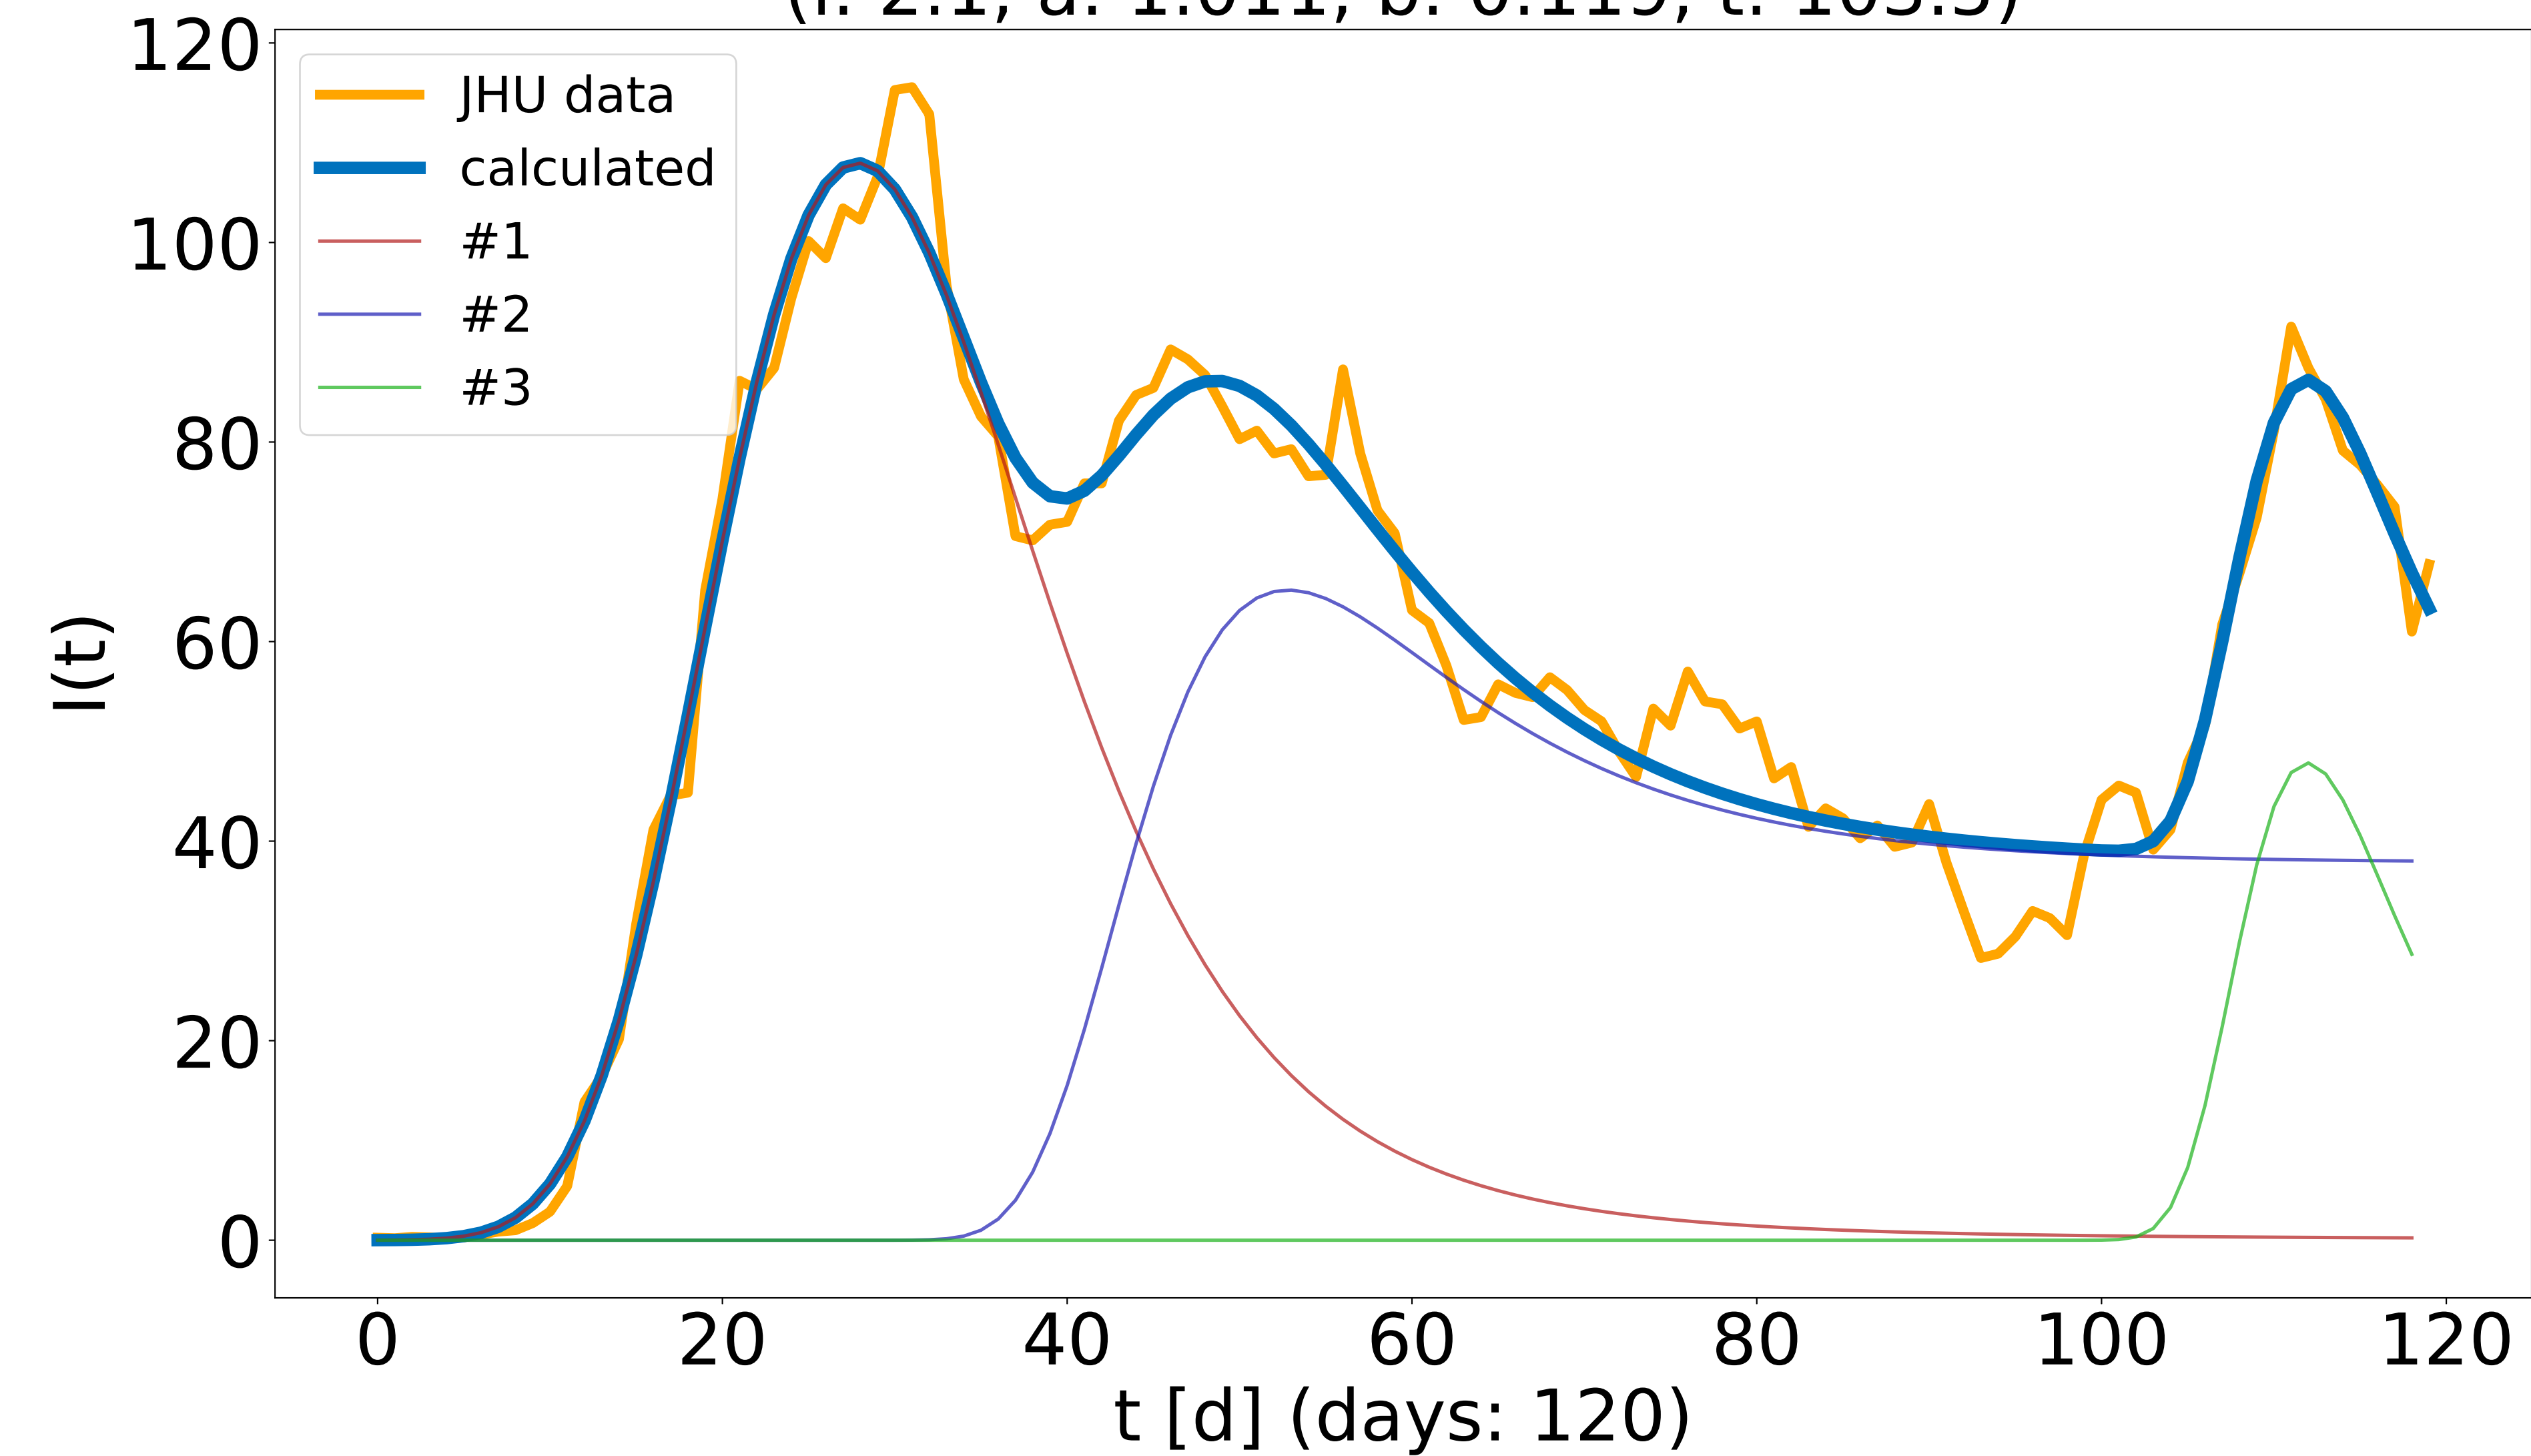



Middlesex, New Jersey, US, Middlesex ( $R^2 = 0.793$ )

(i: 0.1, a: 0.92, b: 0.041, t: 3.1)

(i: 28.5, a: 0.489, b: 0.081, t: 34.6)

(i: 0.1, a: 0.364, b: 1.183, t: 94.9)

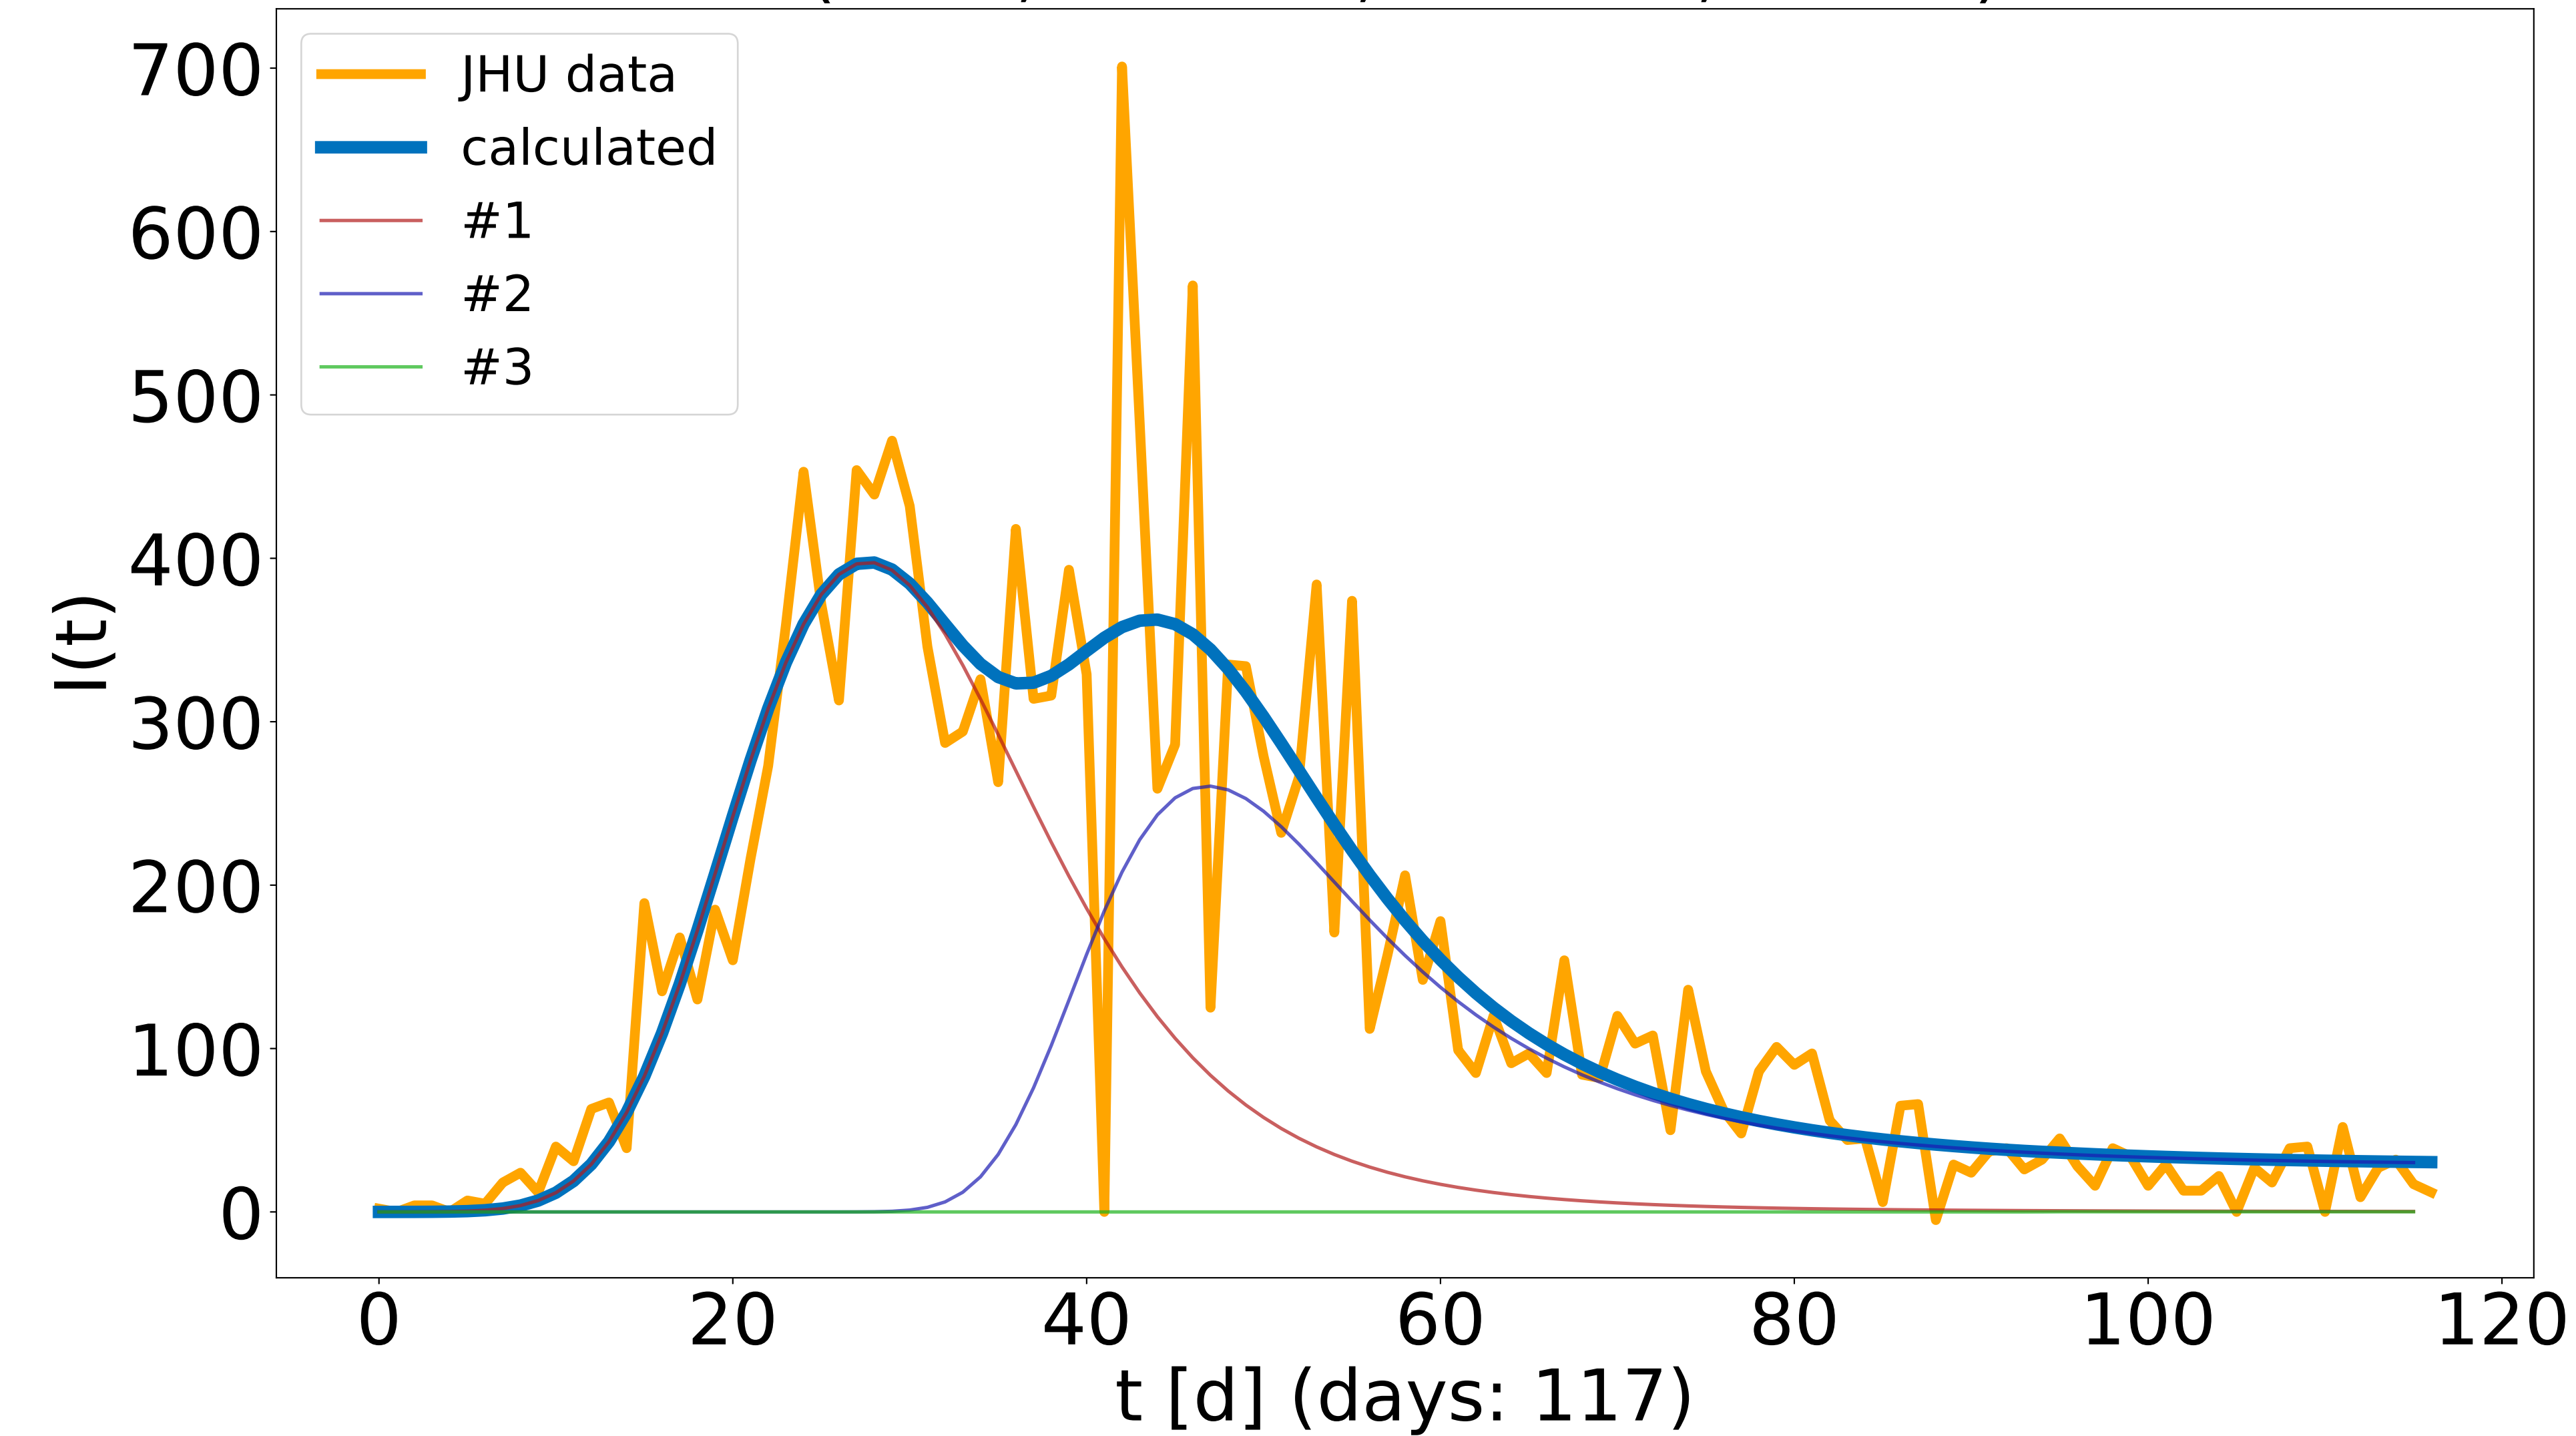

Middlesex, New Jersey, US, Middlesex ( $R^2 = 0.986$ )

(i: 0.1, a: 0.839, b: 0.037, t: 1.3)

(i: 27.3, a: 0.461, b: 0.079, t: 34.8)

(i: 6.3, a: 0.554, b: 1.011, t: 118.9)

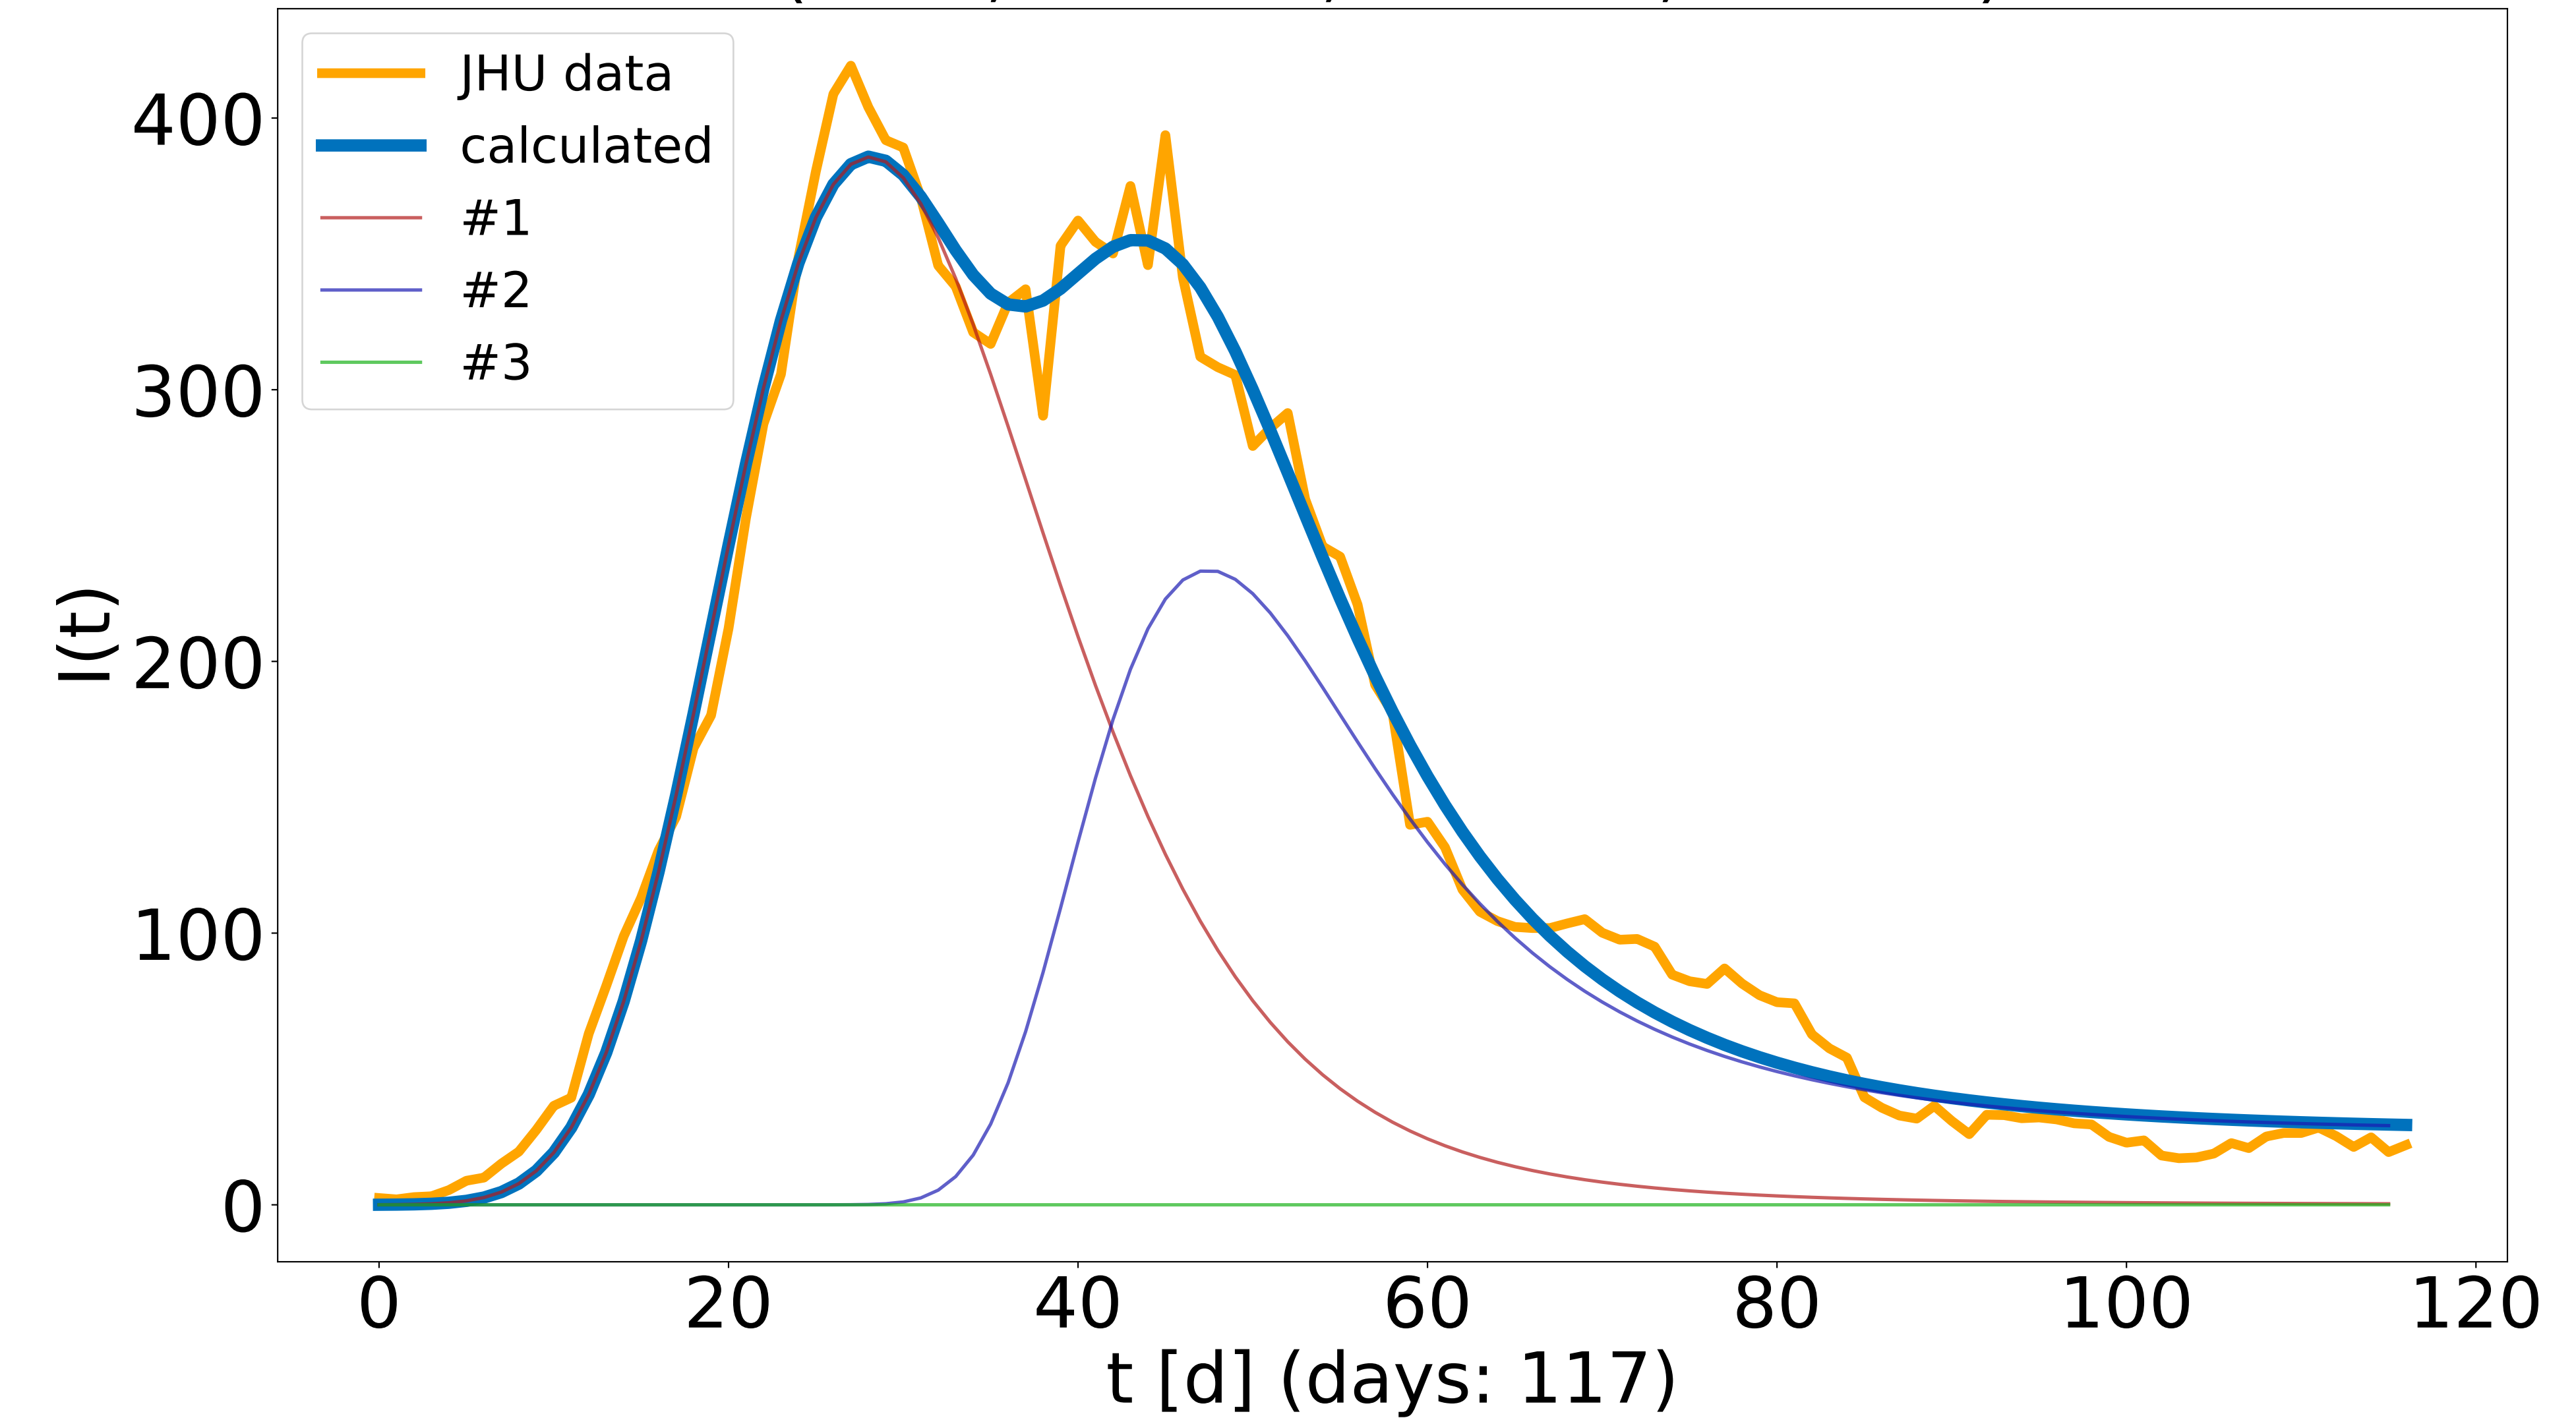



Monmouth, New Jersey, US, Monmouth ( $R^2 = 0.789$ )

(i: 13.0, a: 0.287, b: 0.043, t: 5.0)

(i: 17.0, a: 2.0, b: 0.343, t: 22.2)

(i: 0.1, a: 1.2, b: 1.399, t: 131.2)

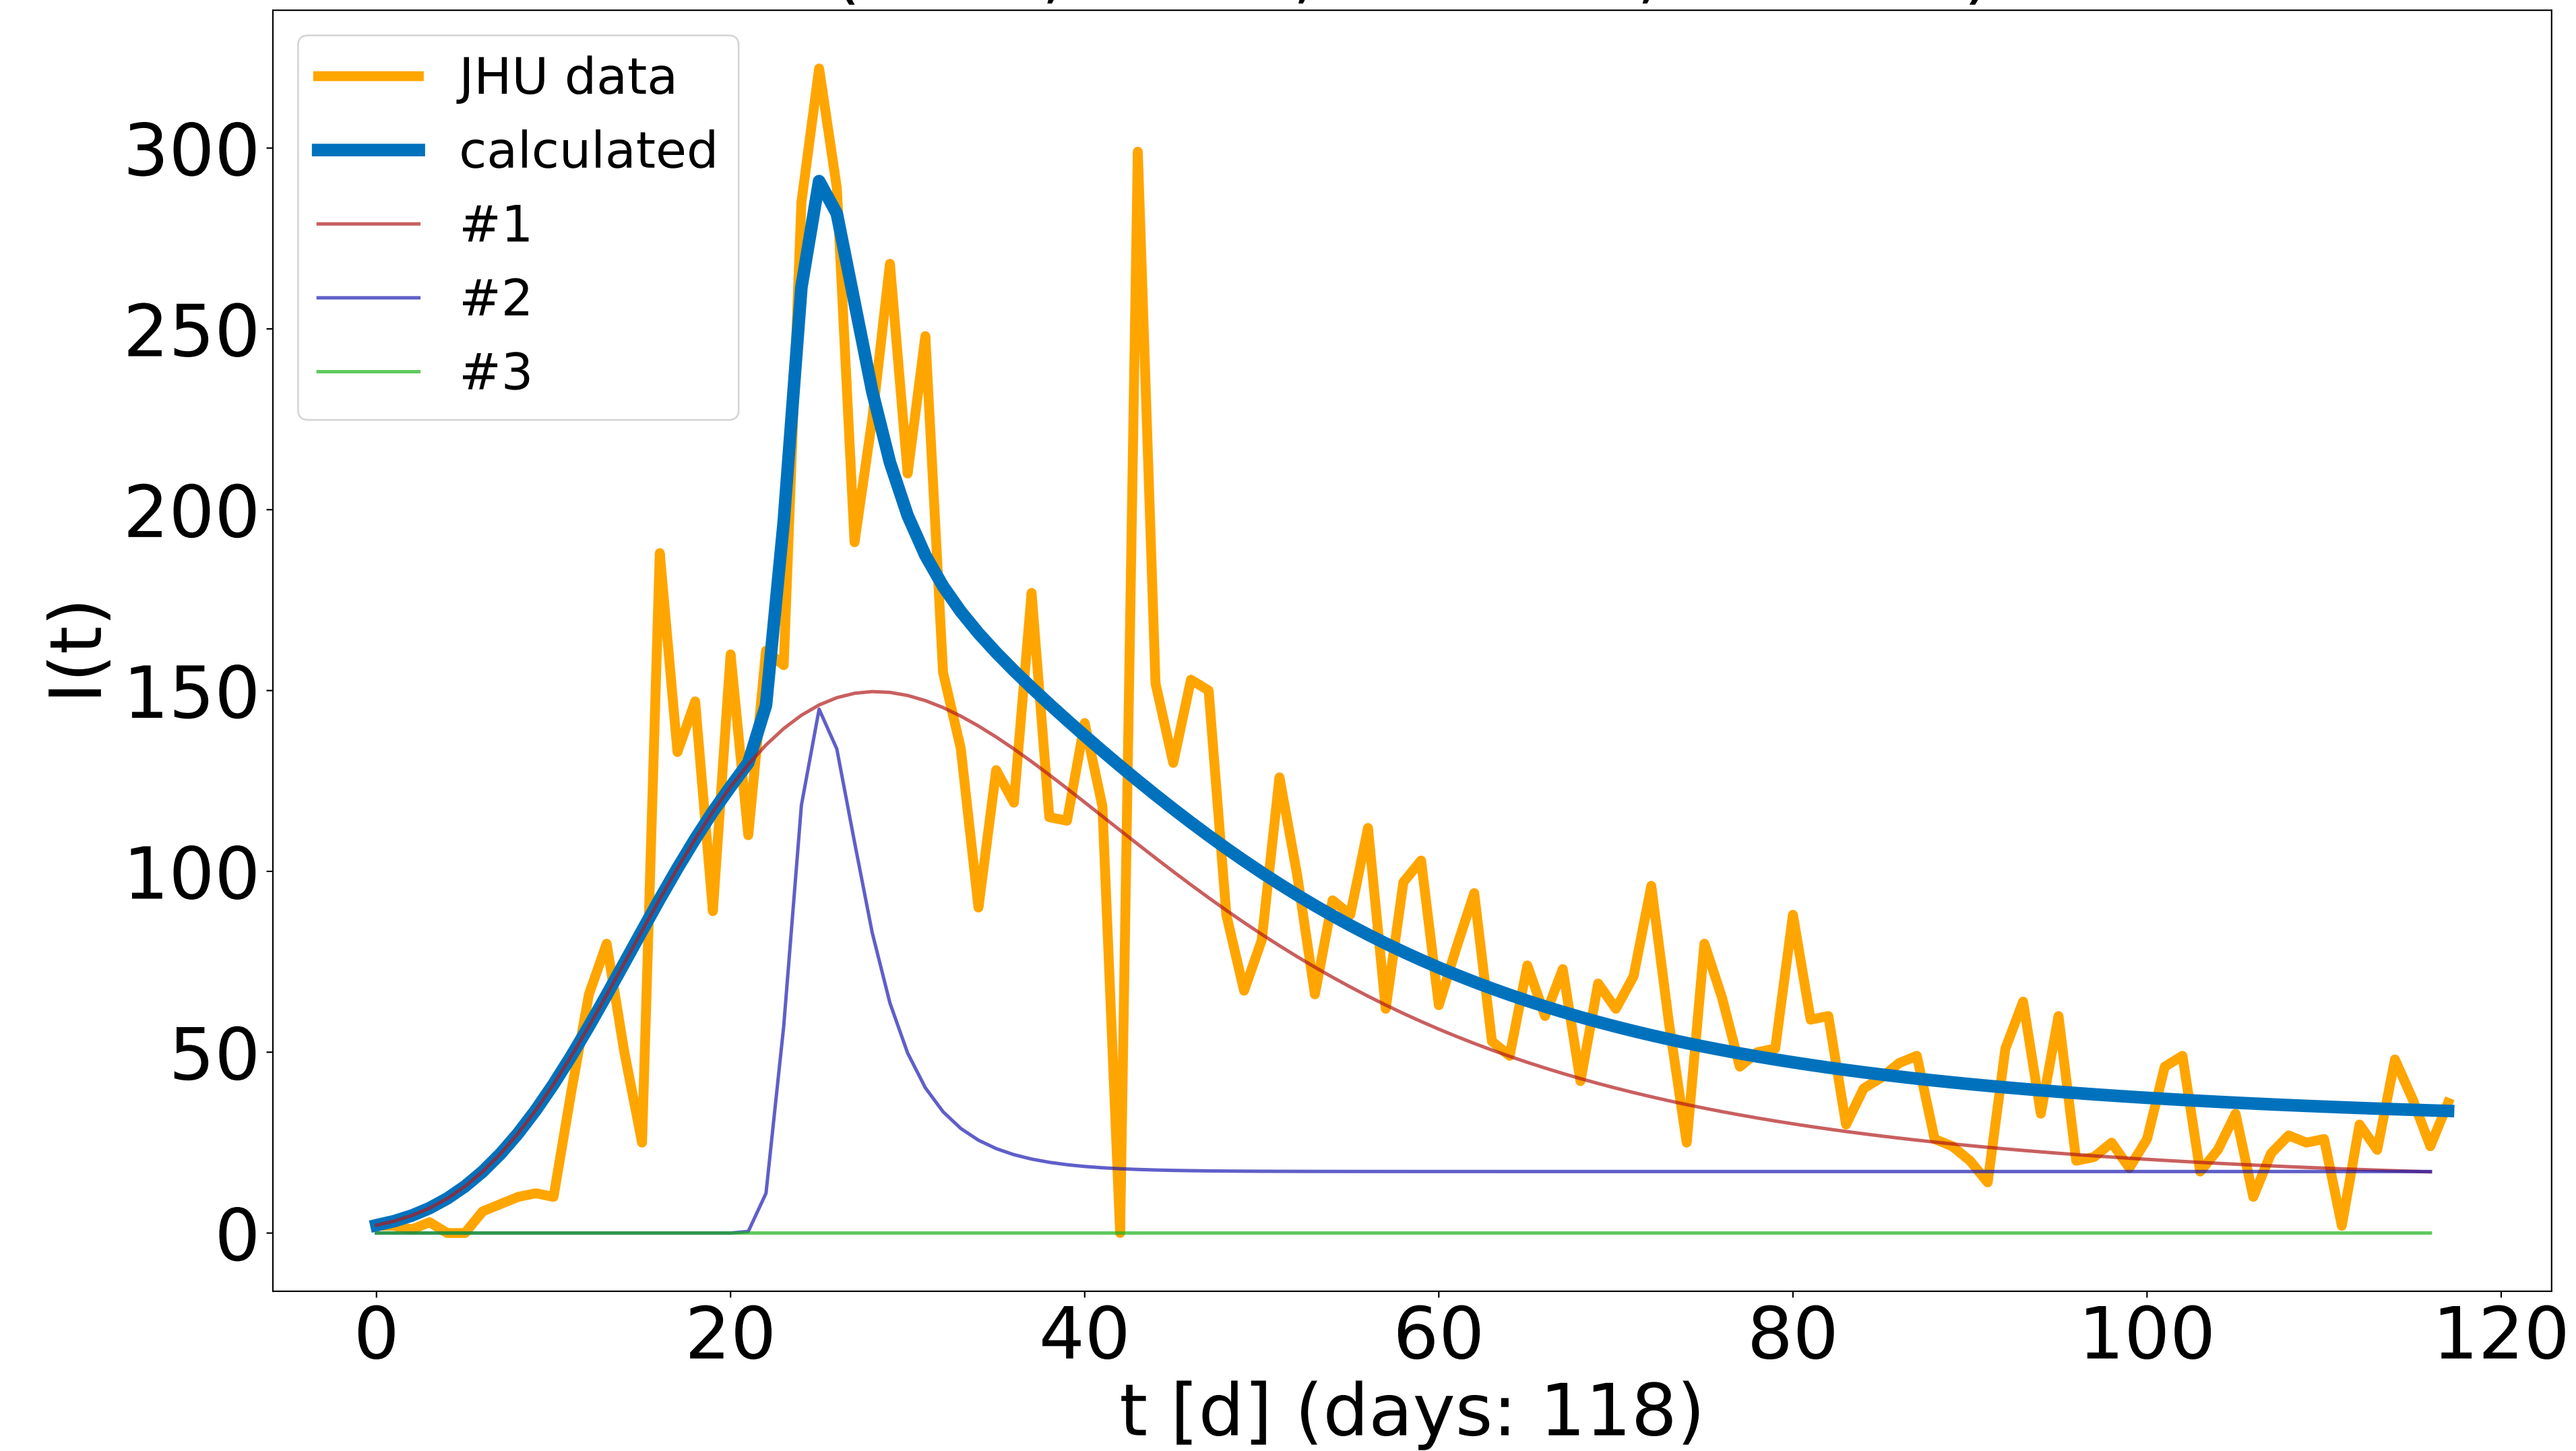

Monmouth, New Jersey, US, Monmouth ( $R^2 = 0.984$ )

(i: 0.1, a: 1.042, b: 0.053, t: 1.6)

(i: 0.1, a: 1.992, b: 0.101, t: 16.8)

(i: 26.3, a: 0.241, b: 0.061, t: 28.7)

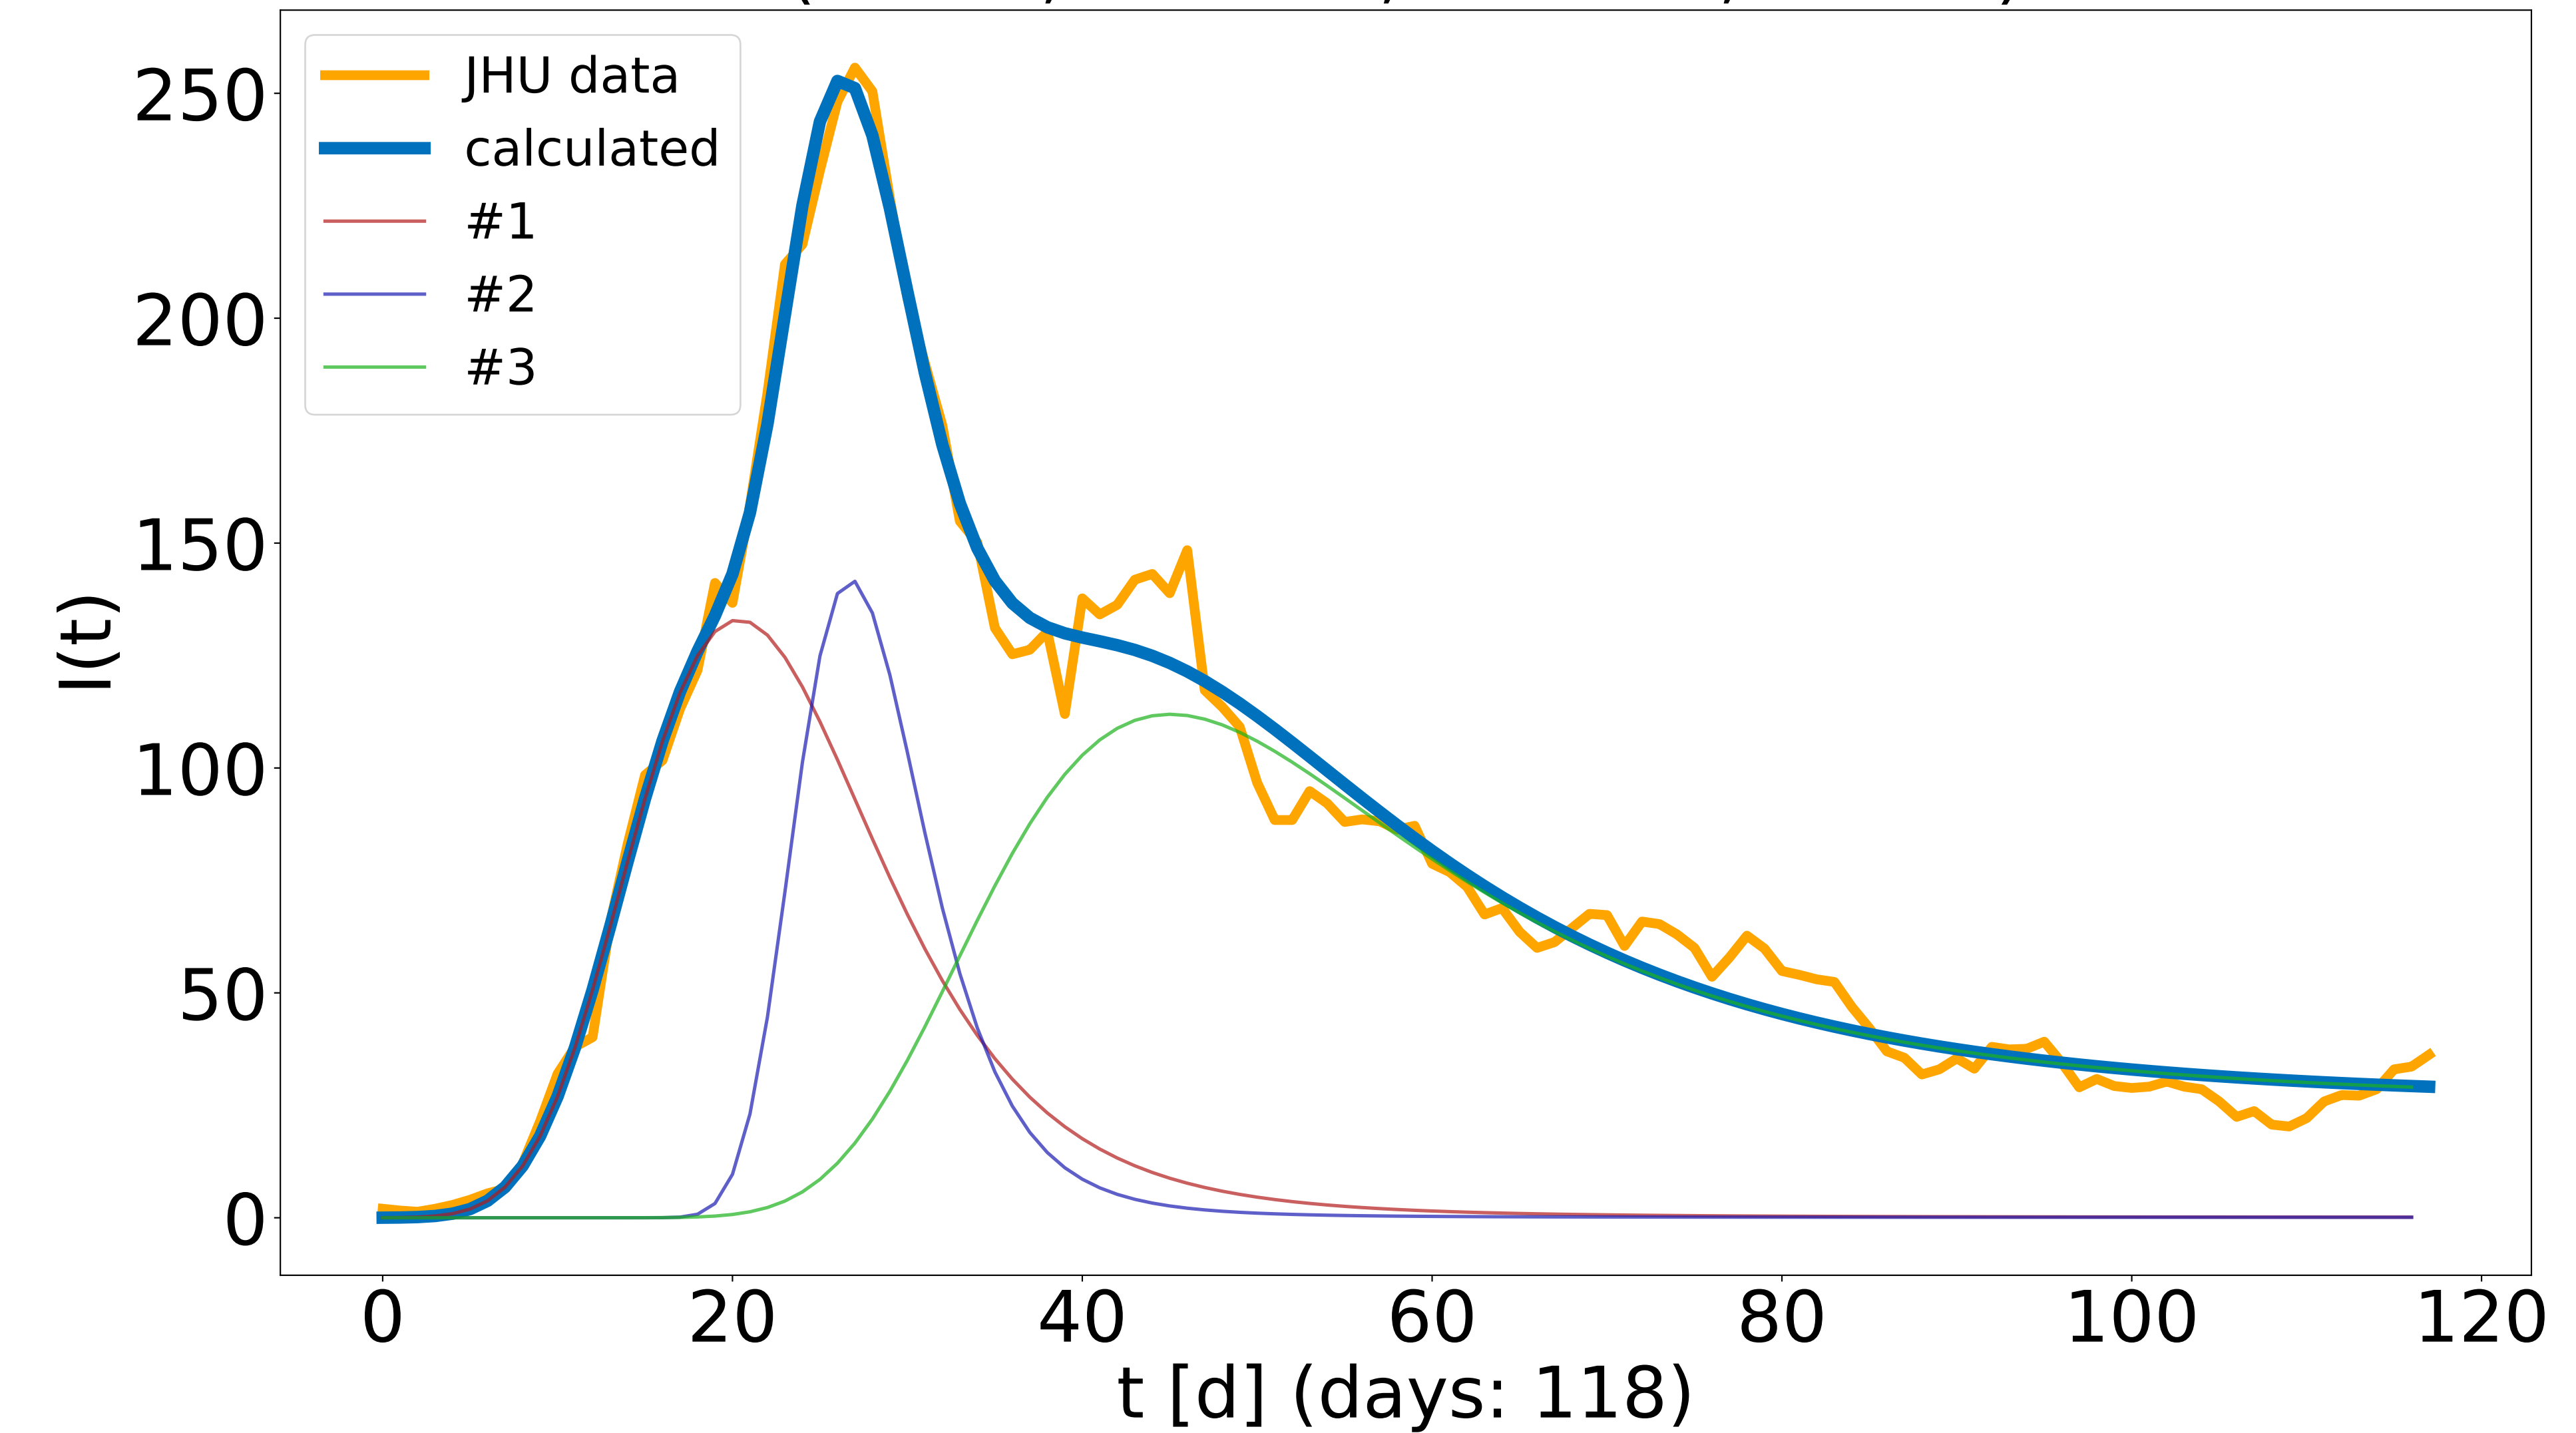

Morris, New Jersey, US, Morris ( $R^2 = 0.752$ )

(i: 0.1, a: 0.951, b: 0.046, t: 2.9)

(i: 11.7, a: 0.454, b: 0.092, t: 32.3)

(i: 0.3, a: 1.623, b: 1.275, t: 106.1)

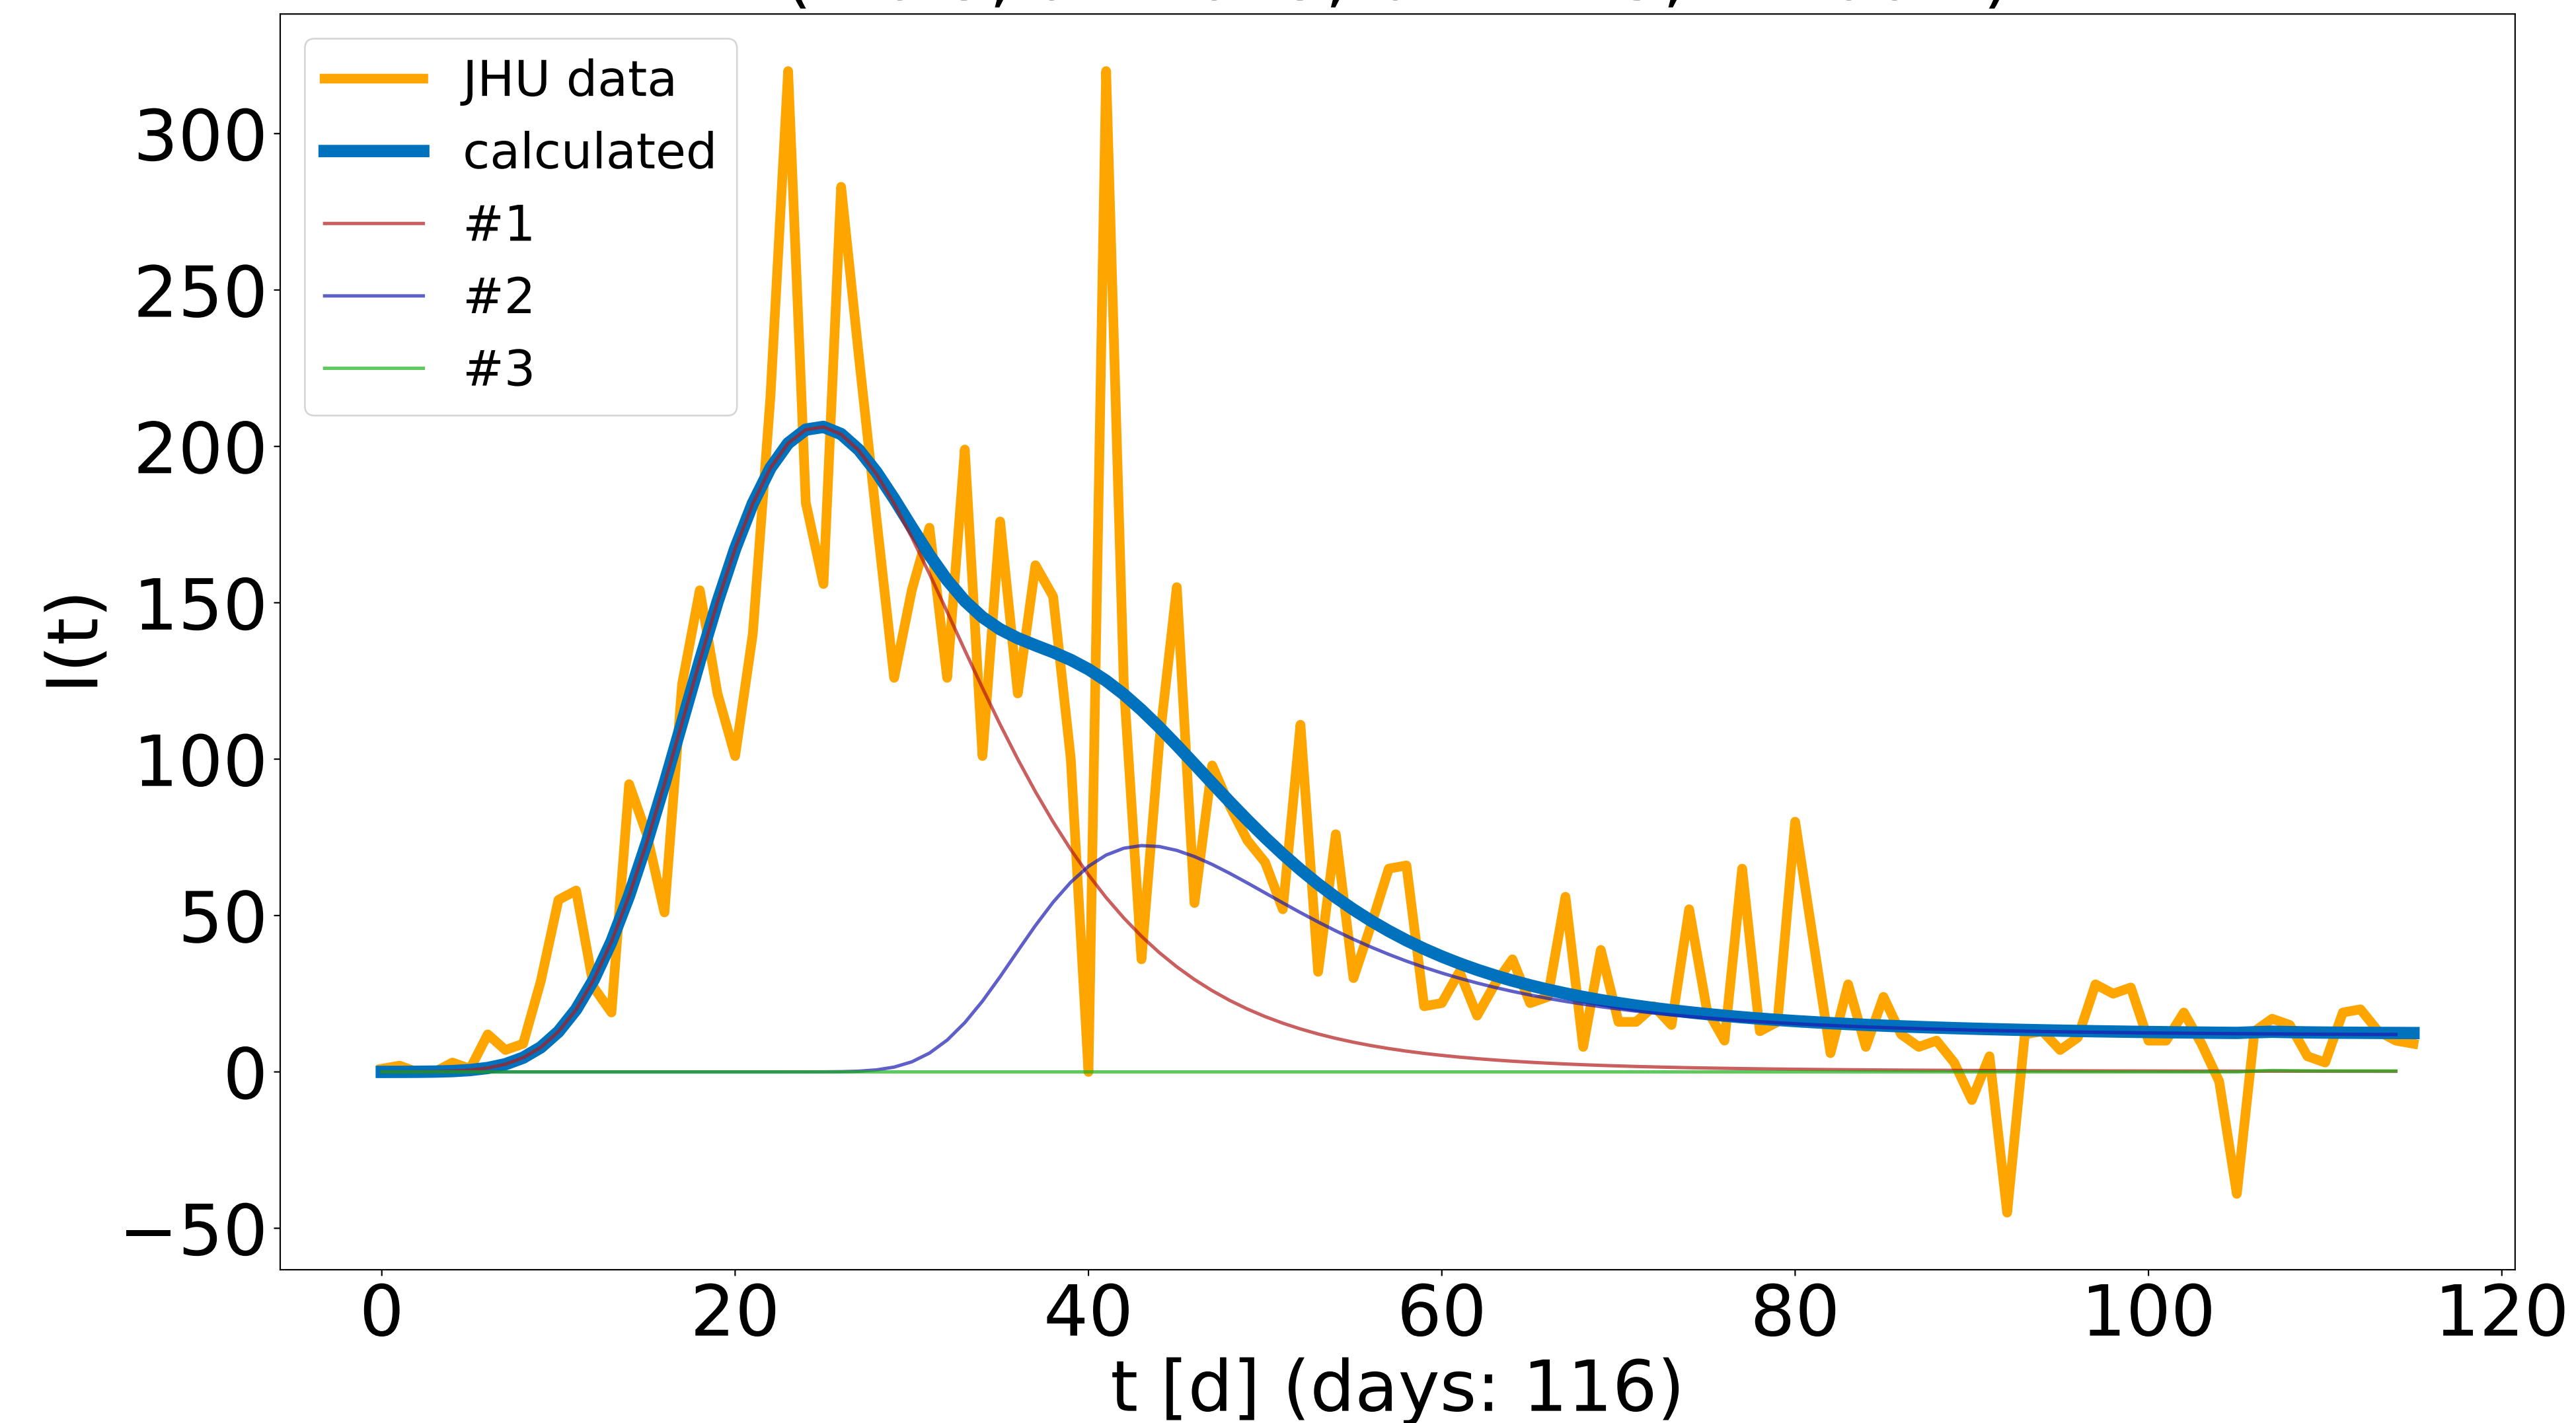

Morris, New Jersey, US, Morris ( $R^2 = 0.982$ )

(i: 3.1, a: 0.397, b: 0.037, t: 1.8)

(i: 0.2, a: 2.0, b: 0.127, t: 15.4)

(i: 5.9, a: 0.638, b: 1.4, t: 109.1)

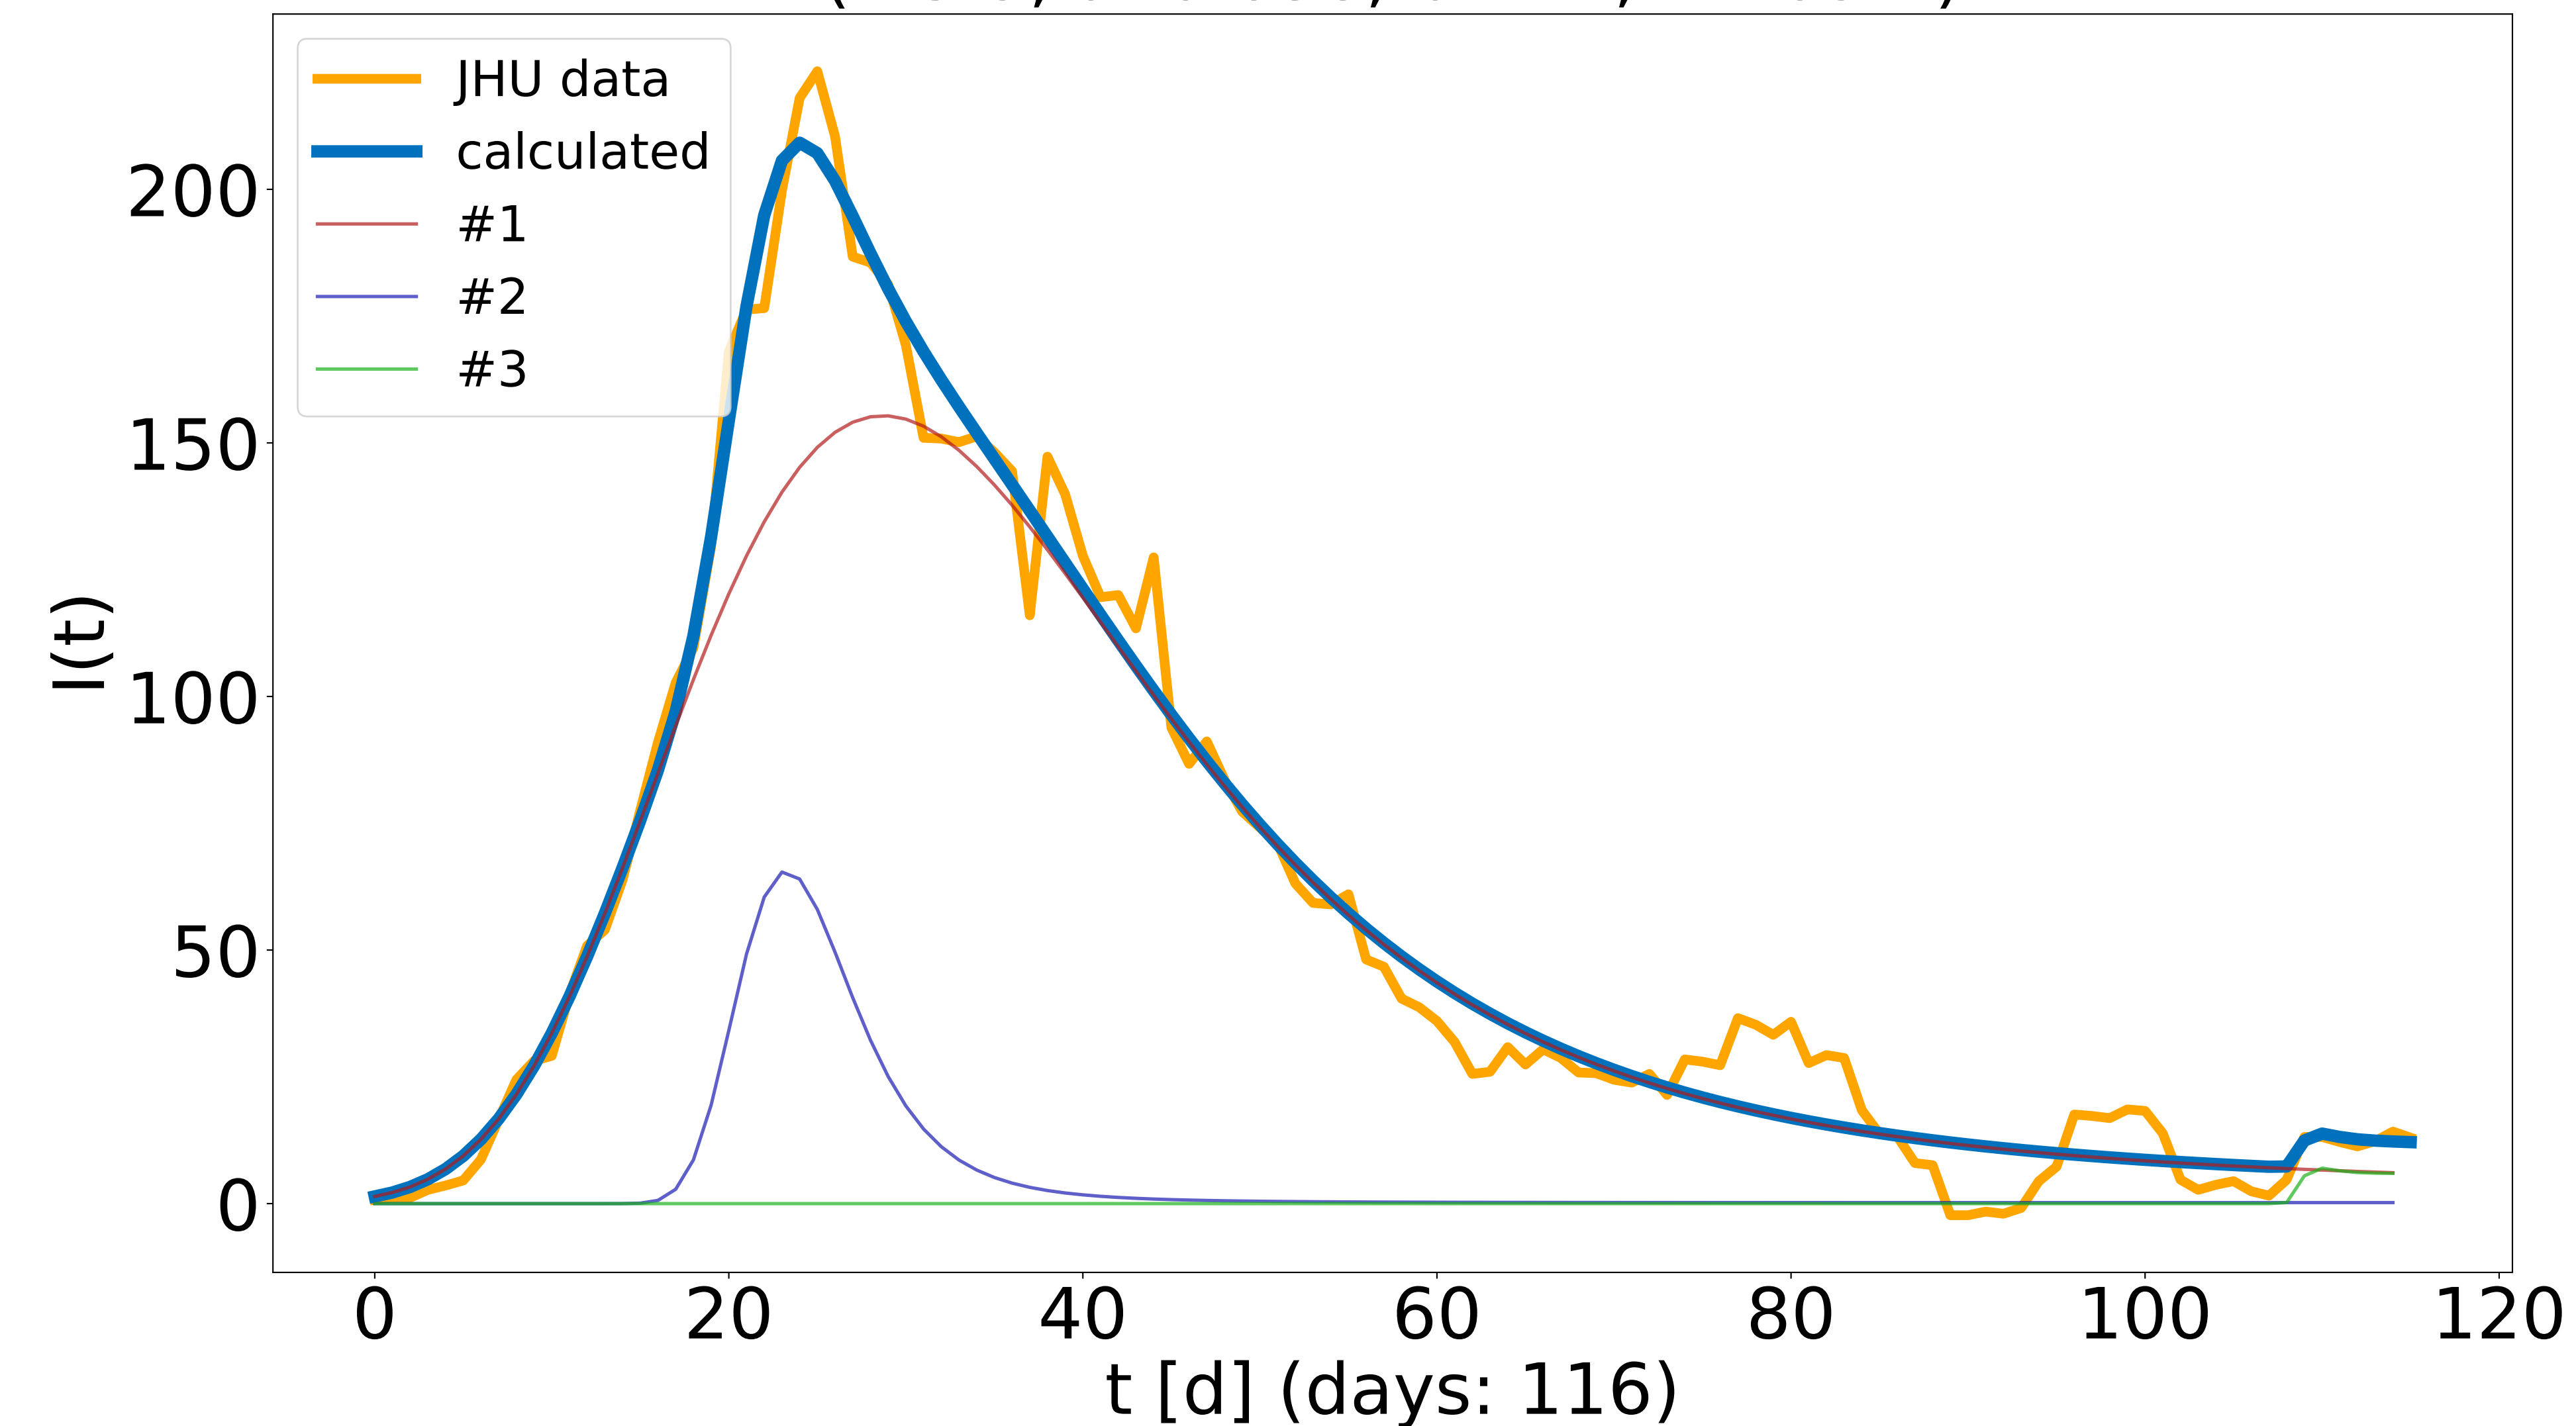

Ocean, New Jersey, US, Ocean ( $R^2 = 0.727$ )

(i: 0.1, a: 0.979, b: 0.047, t: 1.0)

(i: 26.6, a: 0.351, b: 0.081, t: 31.2)

(i: 0.7, a: 1.668, b: 0.526, t: 117.2)

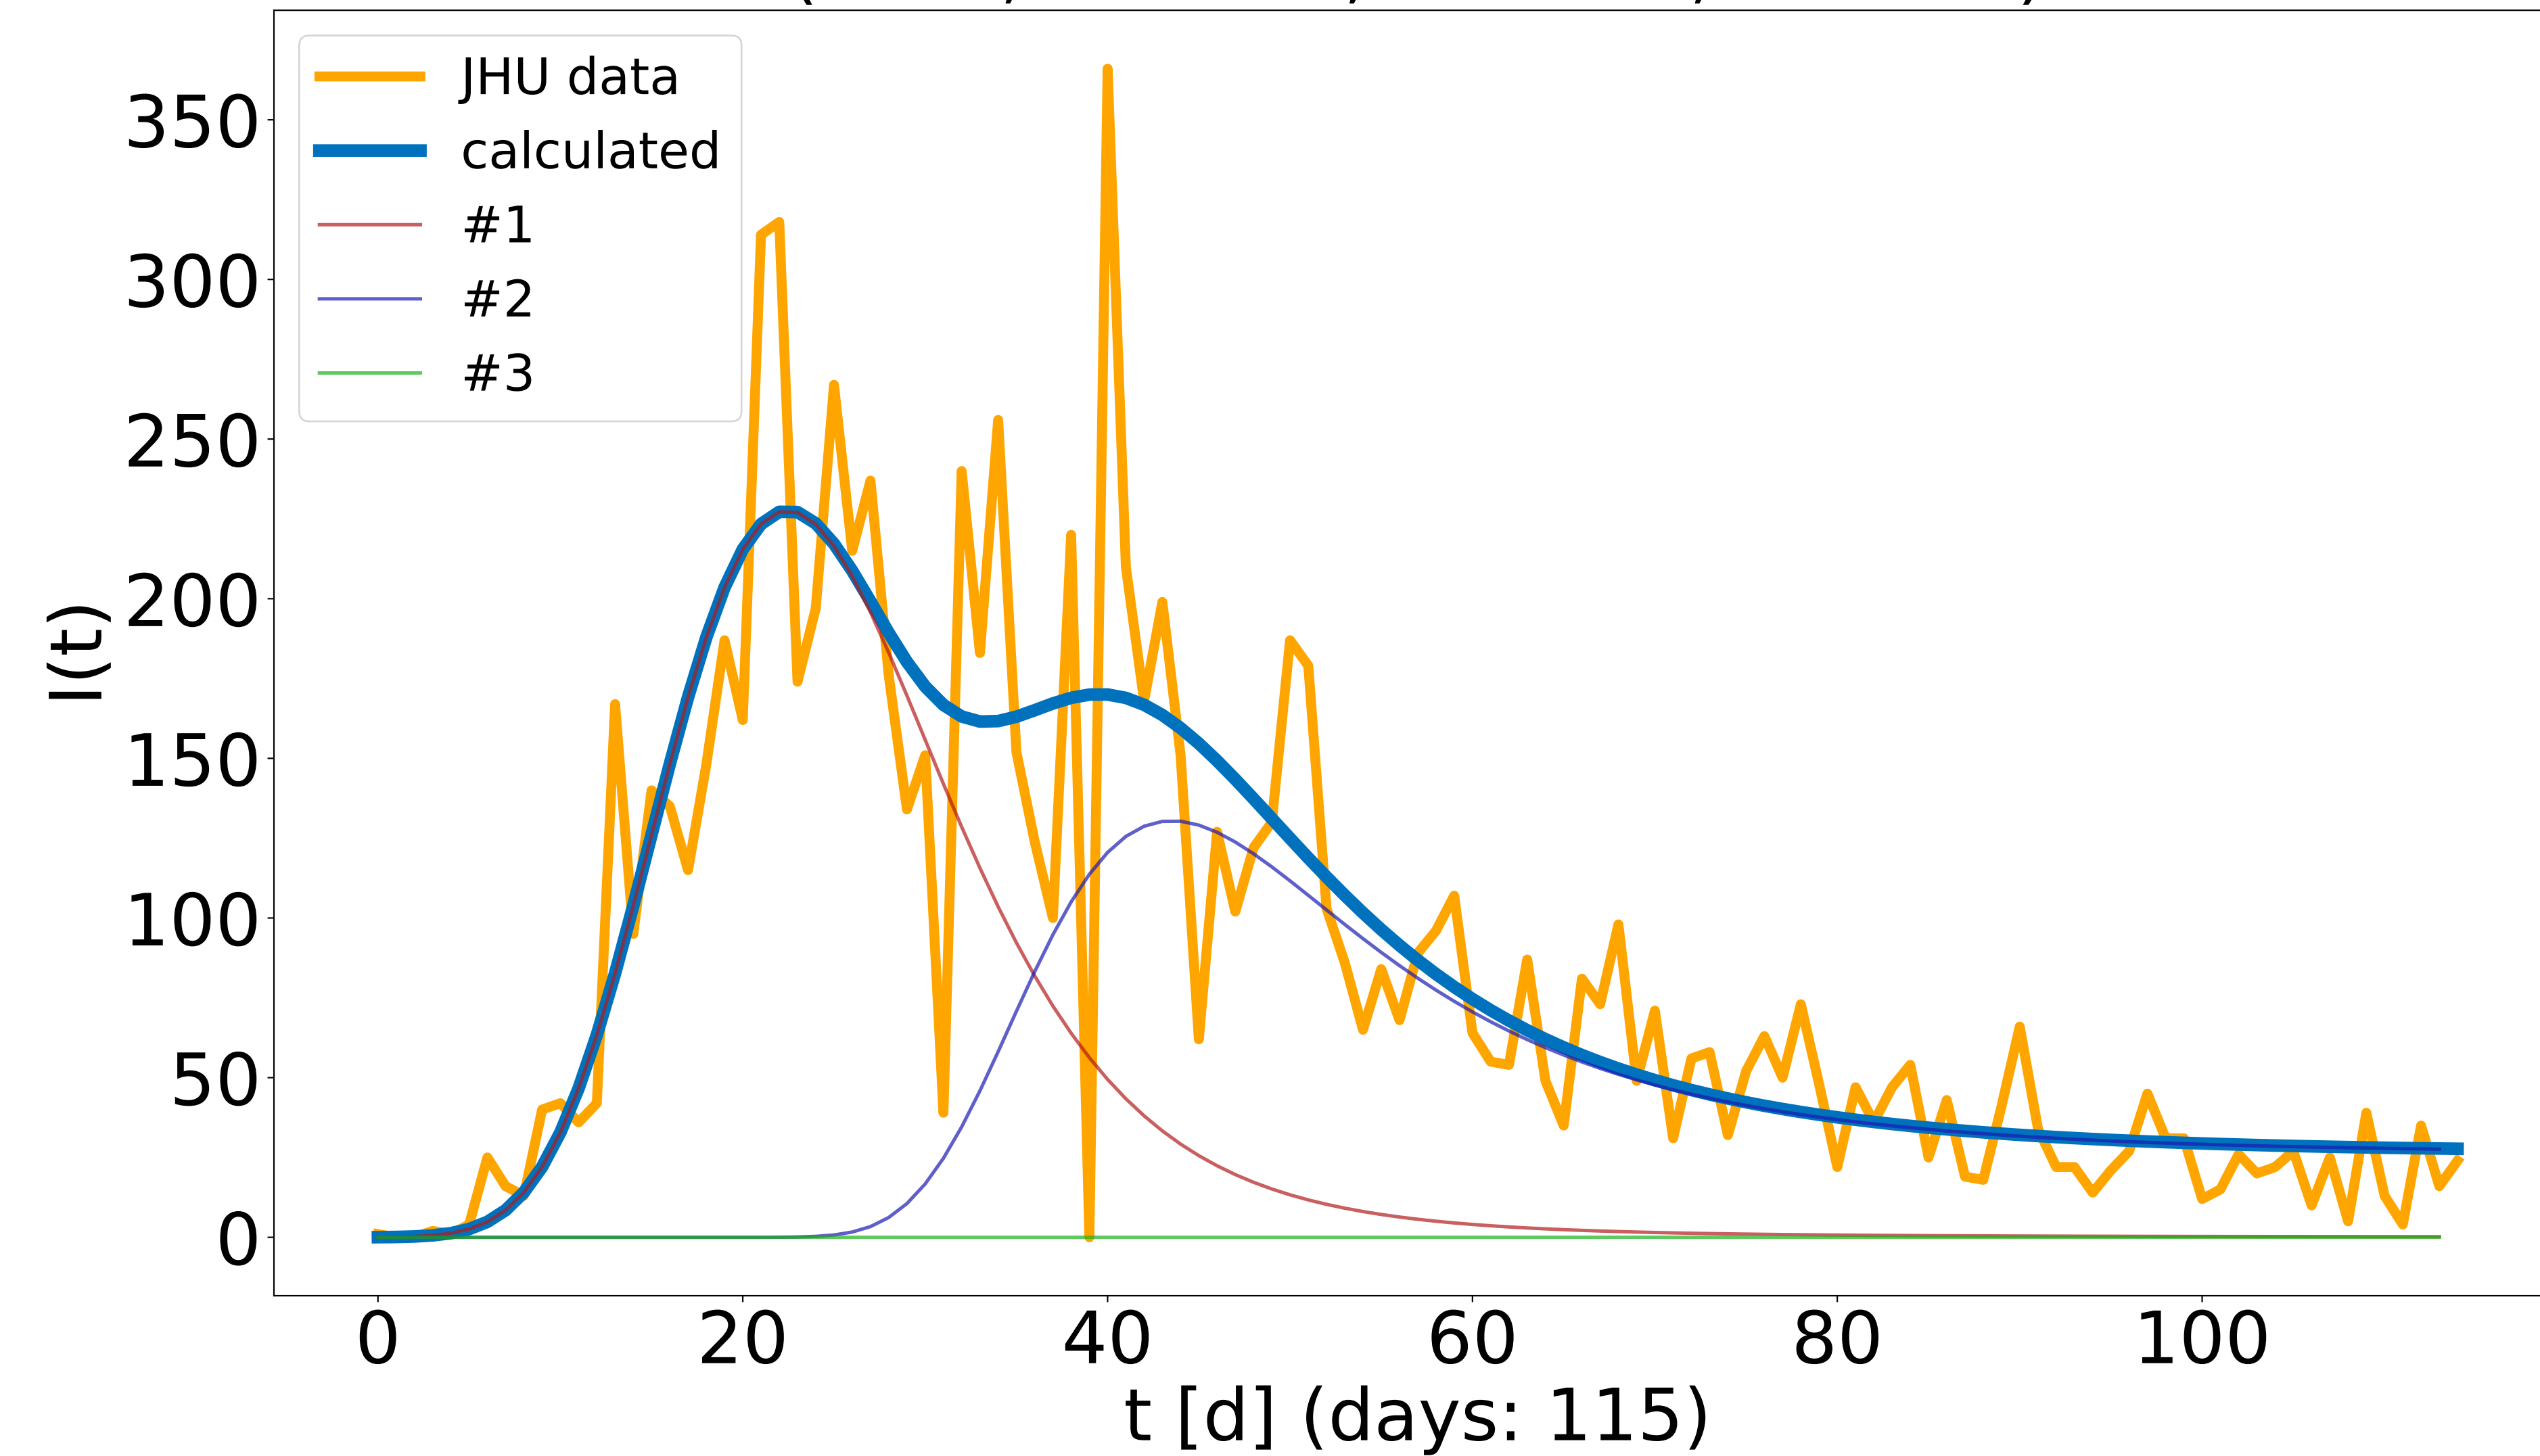

Ocean, New Jersey, US, Ocean ( $R^2 = 0.975$ )

(i: 6.6, a: 0.282, b: 0.032, t: 1.0)

(i: 0.1, a: 1.716, b: 0.093, t: 9.6)

(i: 1.5, a: 0.383, b: 0.104, t: 68.9)

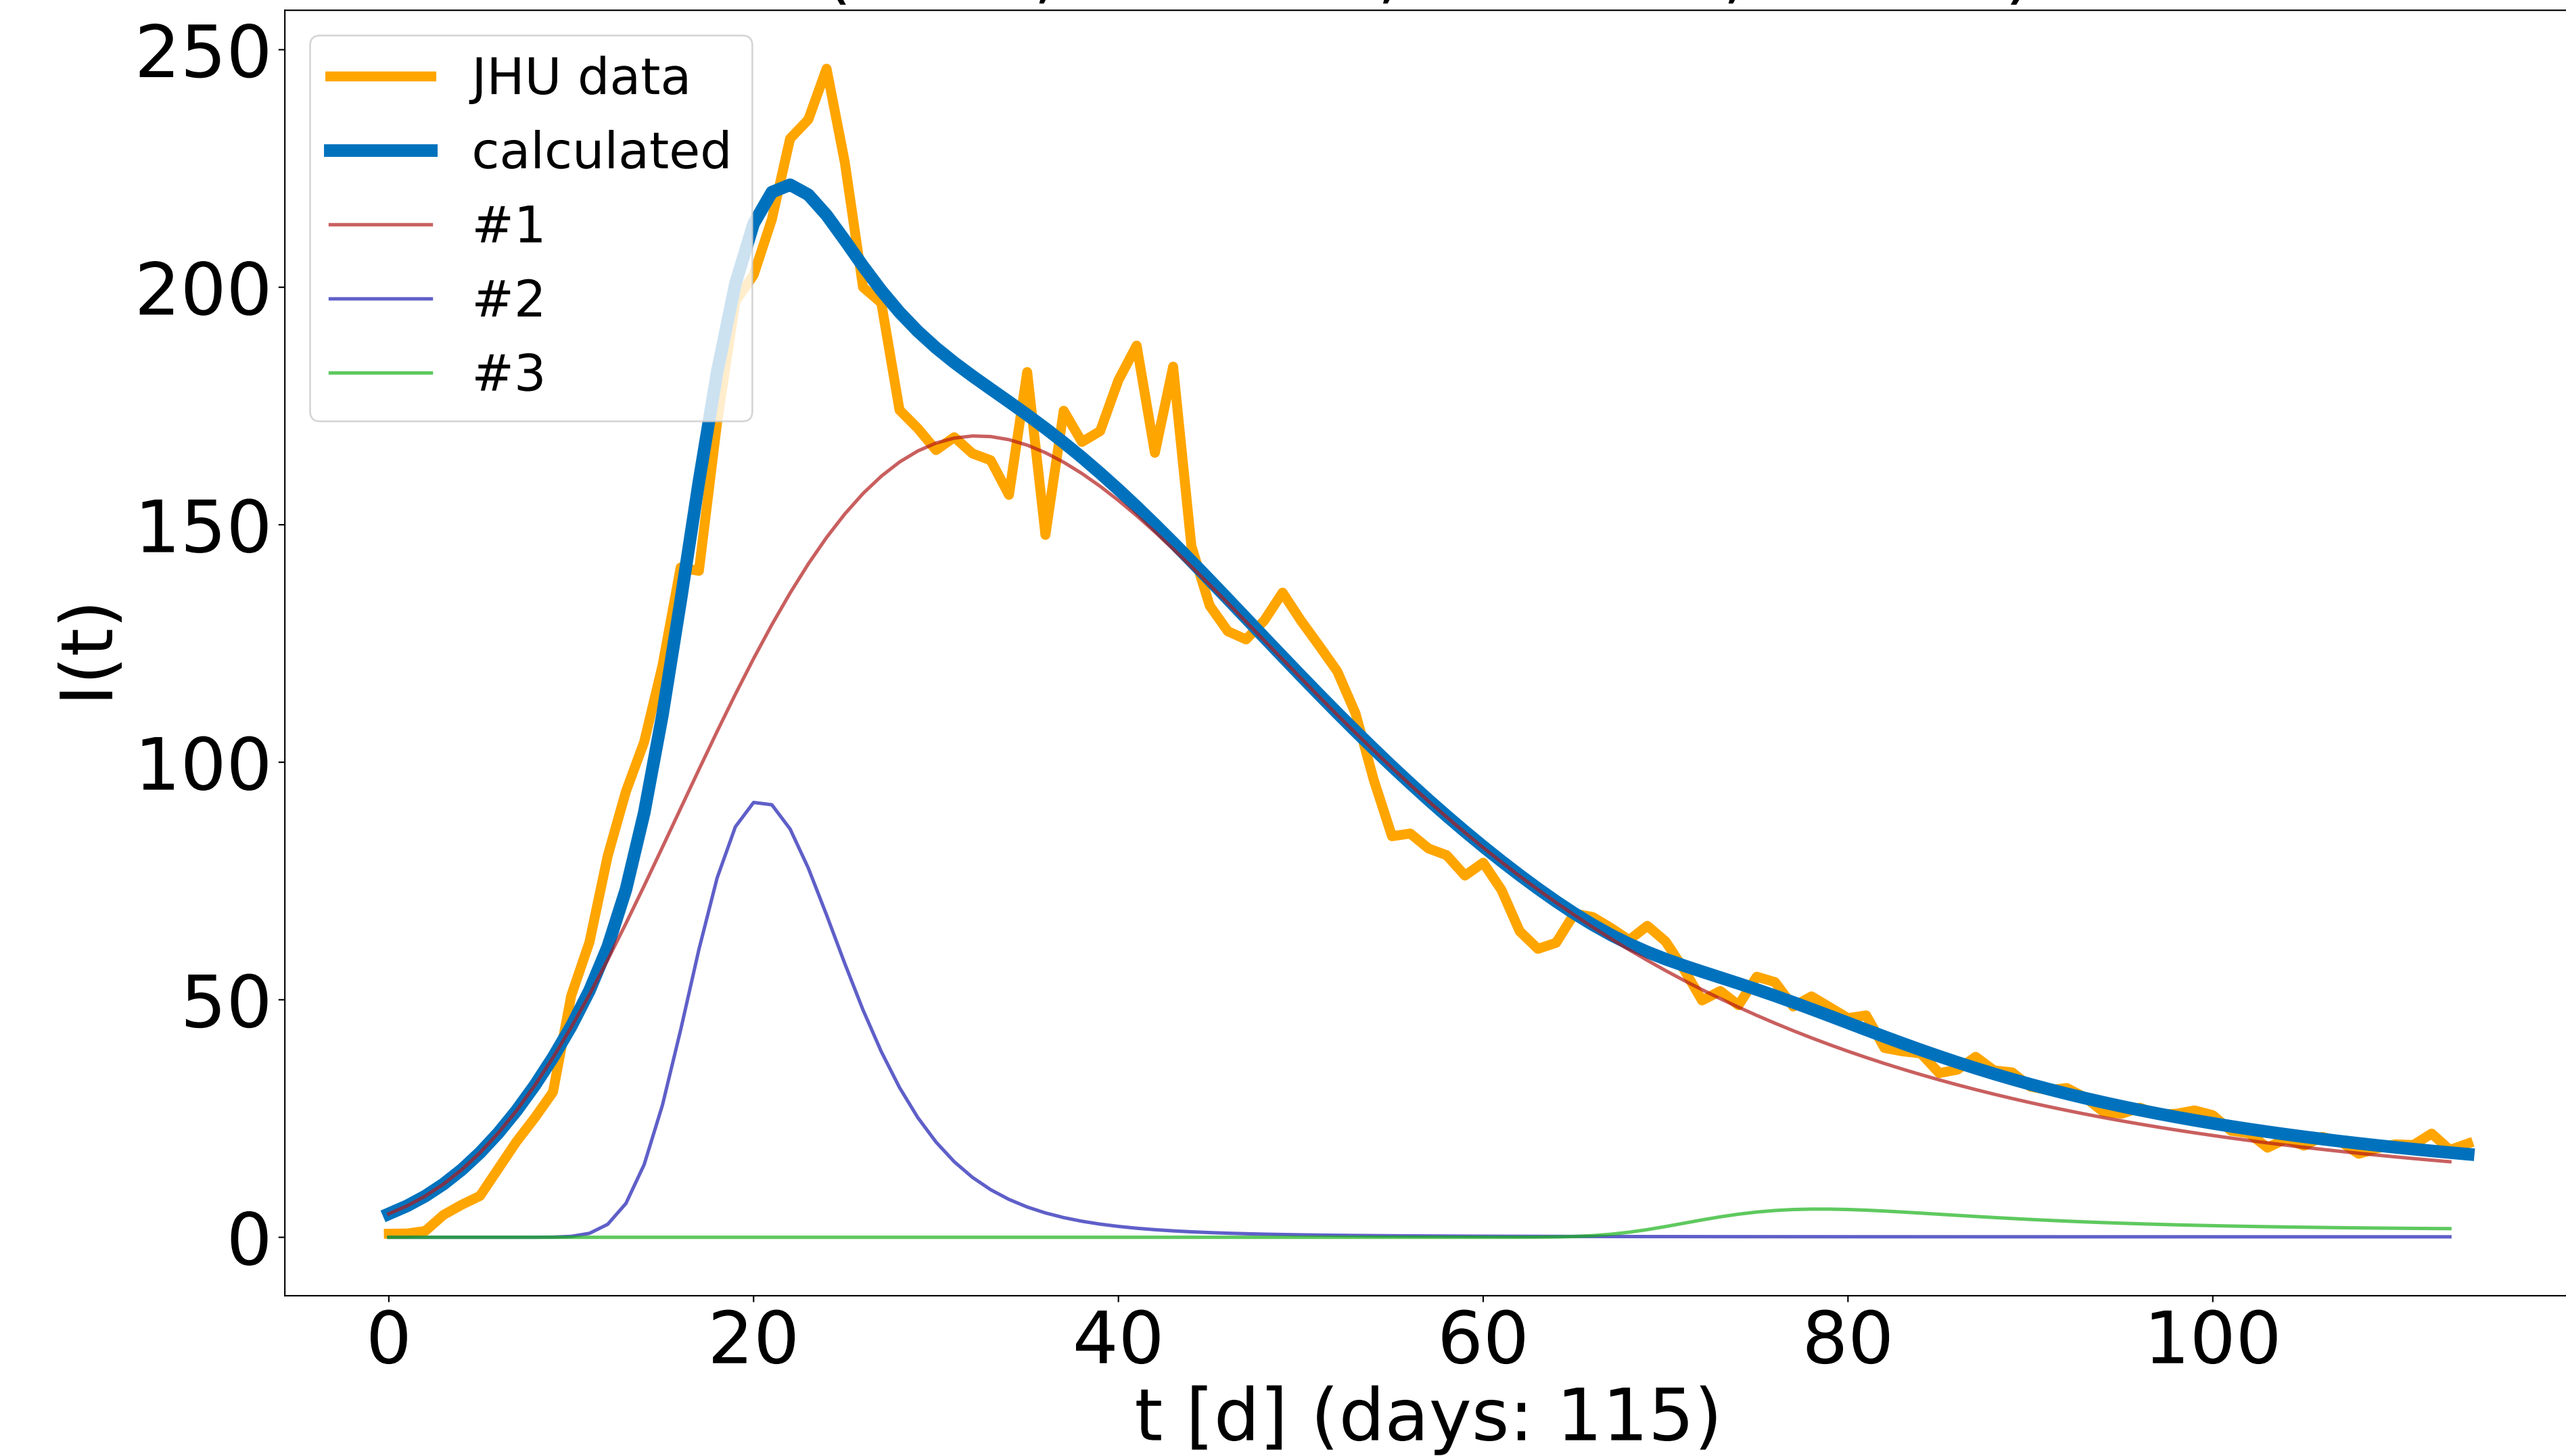



Passaic, New Jersey, US, Passaic ( $R^2 = 0.761$ )  
(i: 19.3, a: 0.624, b: 0.075, t: 13.4)  
(i: 1.9, a: 0.809, b: 0.059, t: 28.8)  
(i: 1.3, a: 0.693, b: 1.067, t: 120.8)

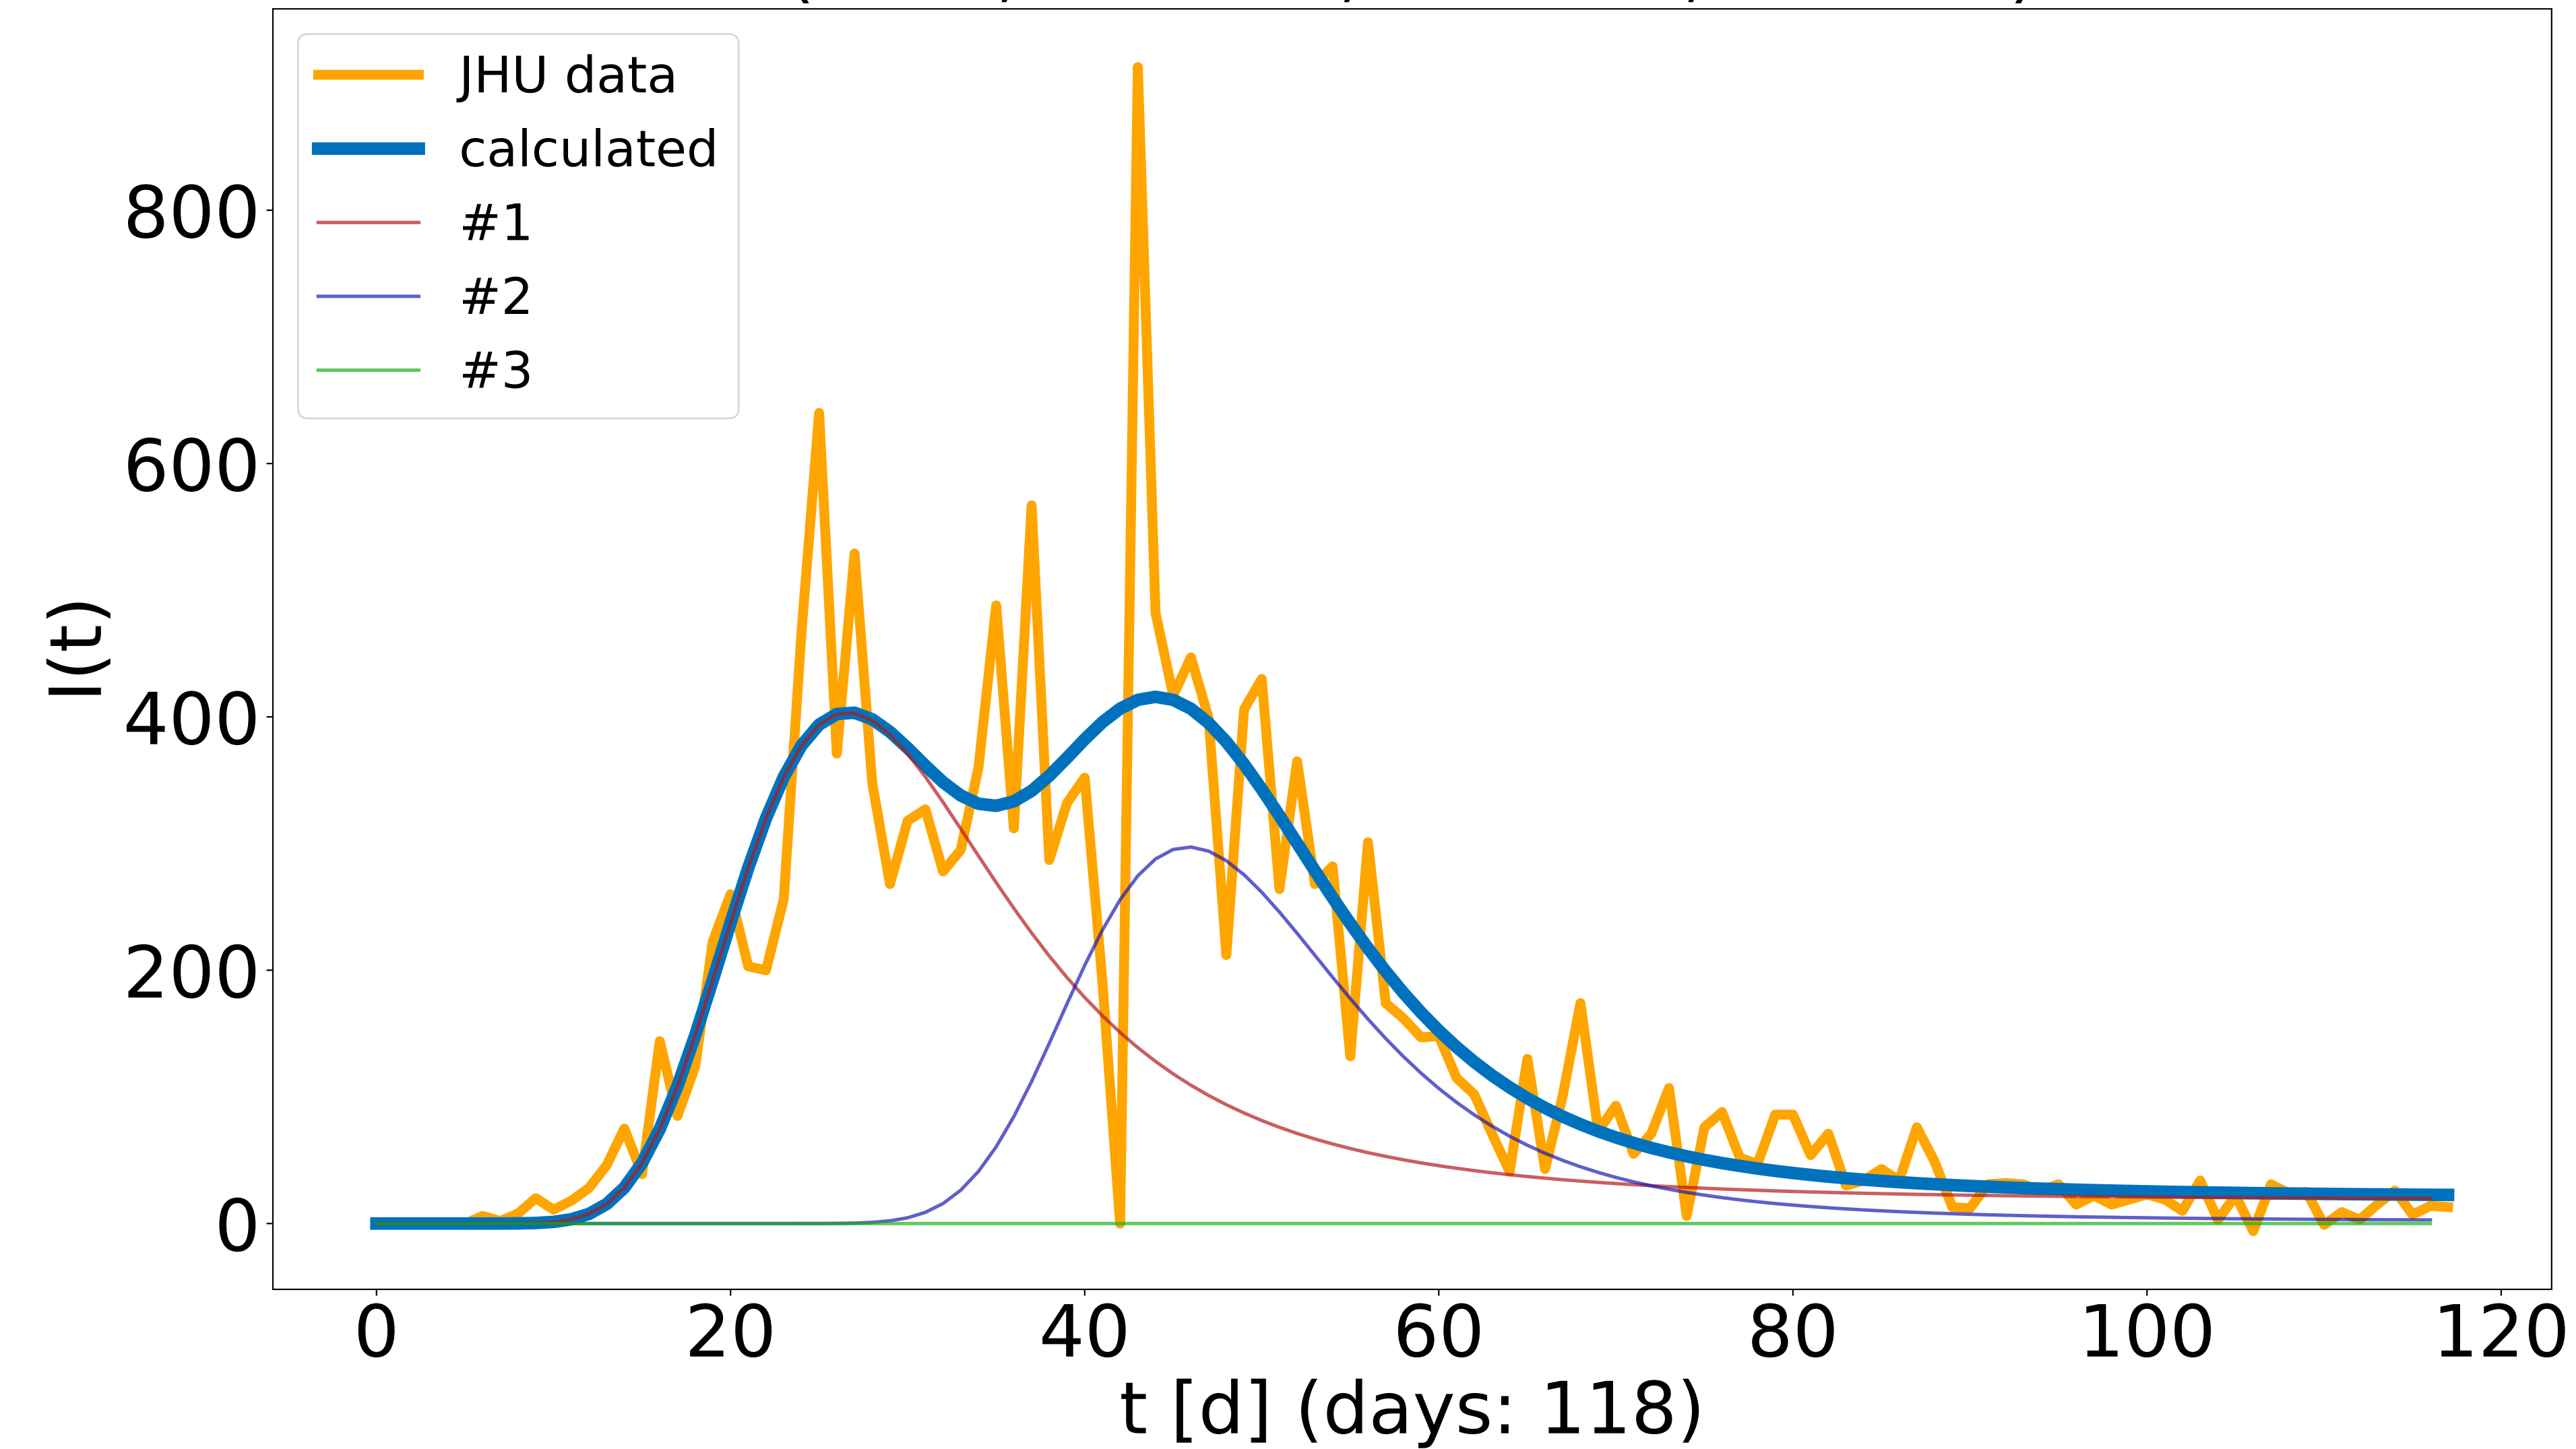

Passaic, New Jersey, US, Passaic ( $R^2 = 0.984$ )  
(i: 16.9, a: 0.53, b: 0.062, t: 11.6)  
(i: 3.0, a: 0.806, b: 0.066, t: 31.2)  
(i: 0.6, a: 0.654, b: 1.19, t: 119.4)

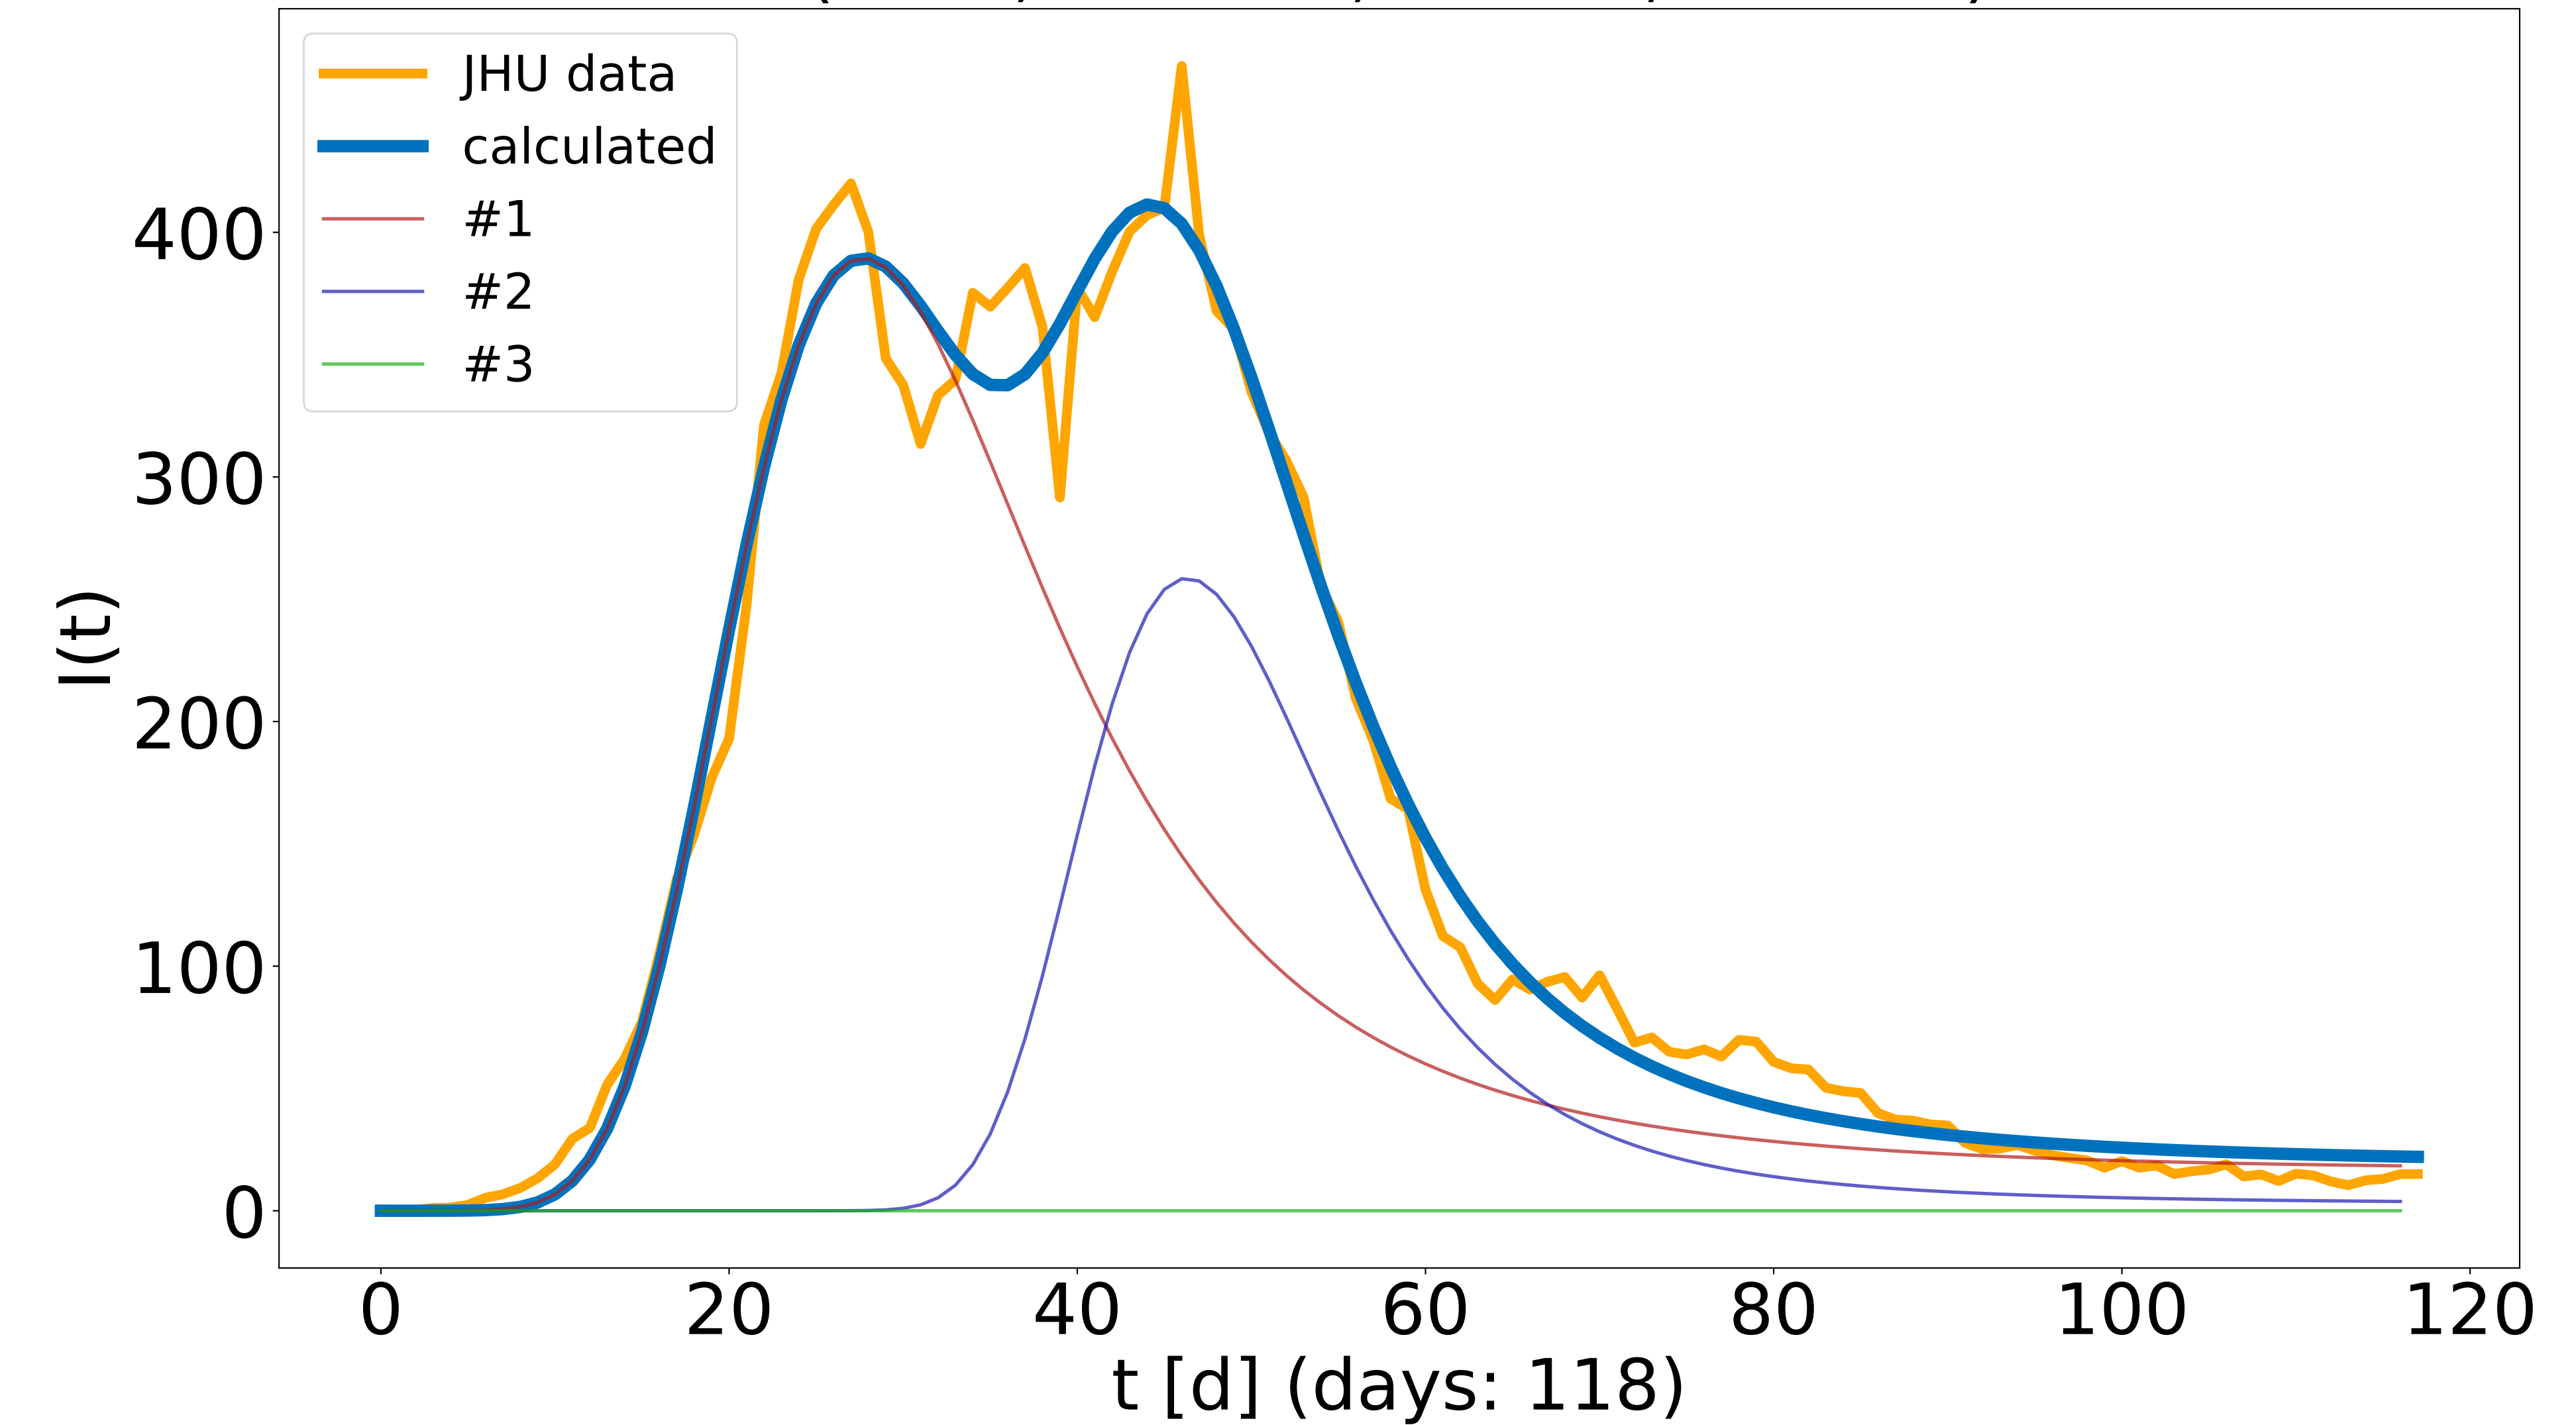



Somerset, New Jersey, US, Somerset ( $R^2 = 0.802$ )

(i: 0.5, a: 0.504, b: 0.035, t: 1.2)

(i: 10.9, a: 2.0, b: 0.468, t: 40.1)

(i: 2.0, a: 1.962, b: 1.279, t: 111.2)

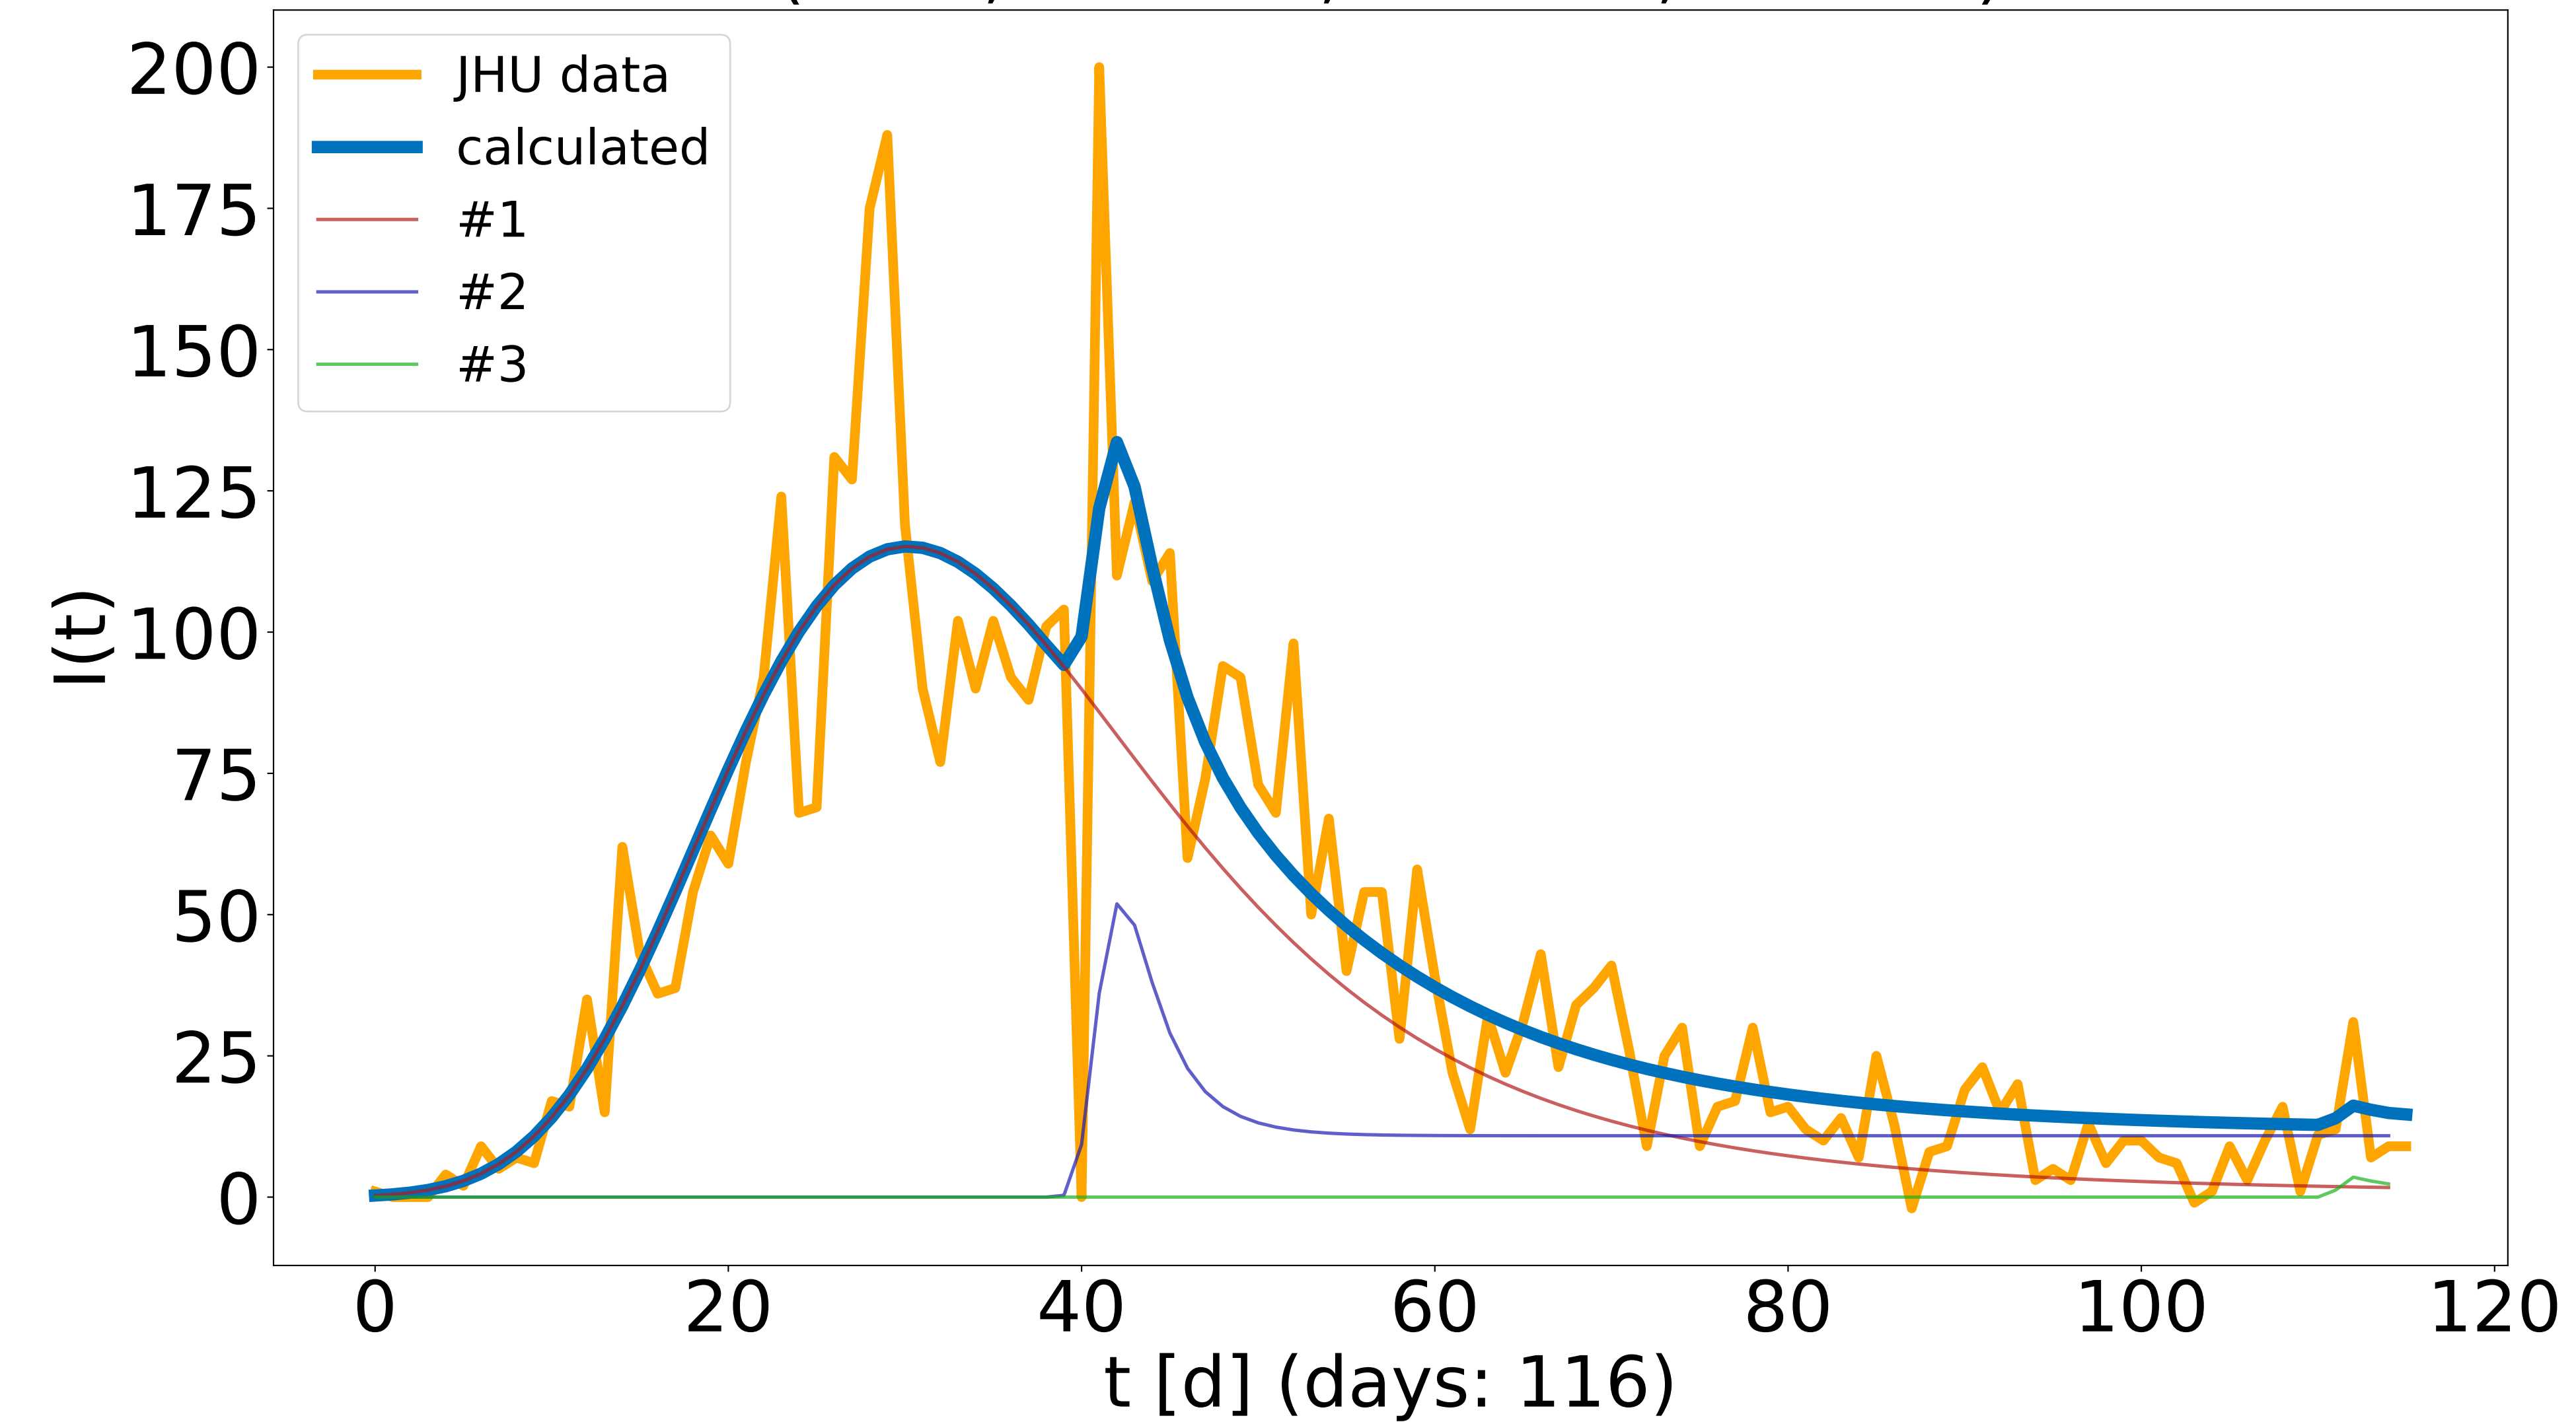

Somerset, New Jersey, US, Somerset ( $R^2 = 0.98$ )

(i: 0.2, a: 0.646, b: 0.036, t: 1.0)

(i: 10.1, a: 0.495, b: 0.116, t: 37.7)

(i: 0.1, a: 1.994, b: 0.674, t: 89.2)

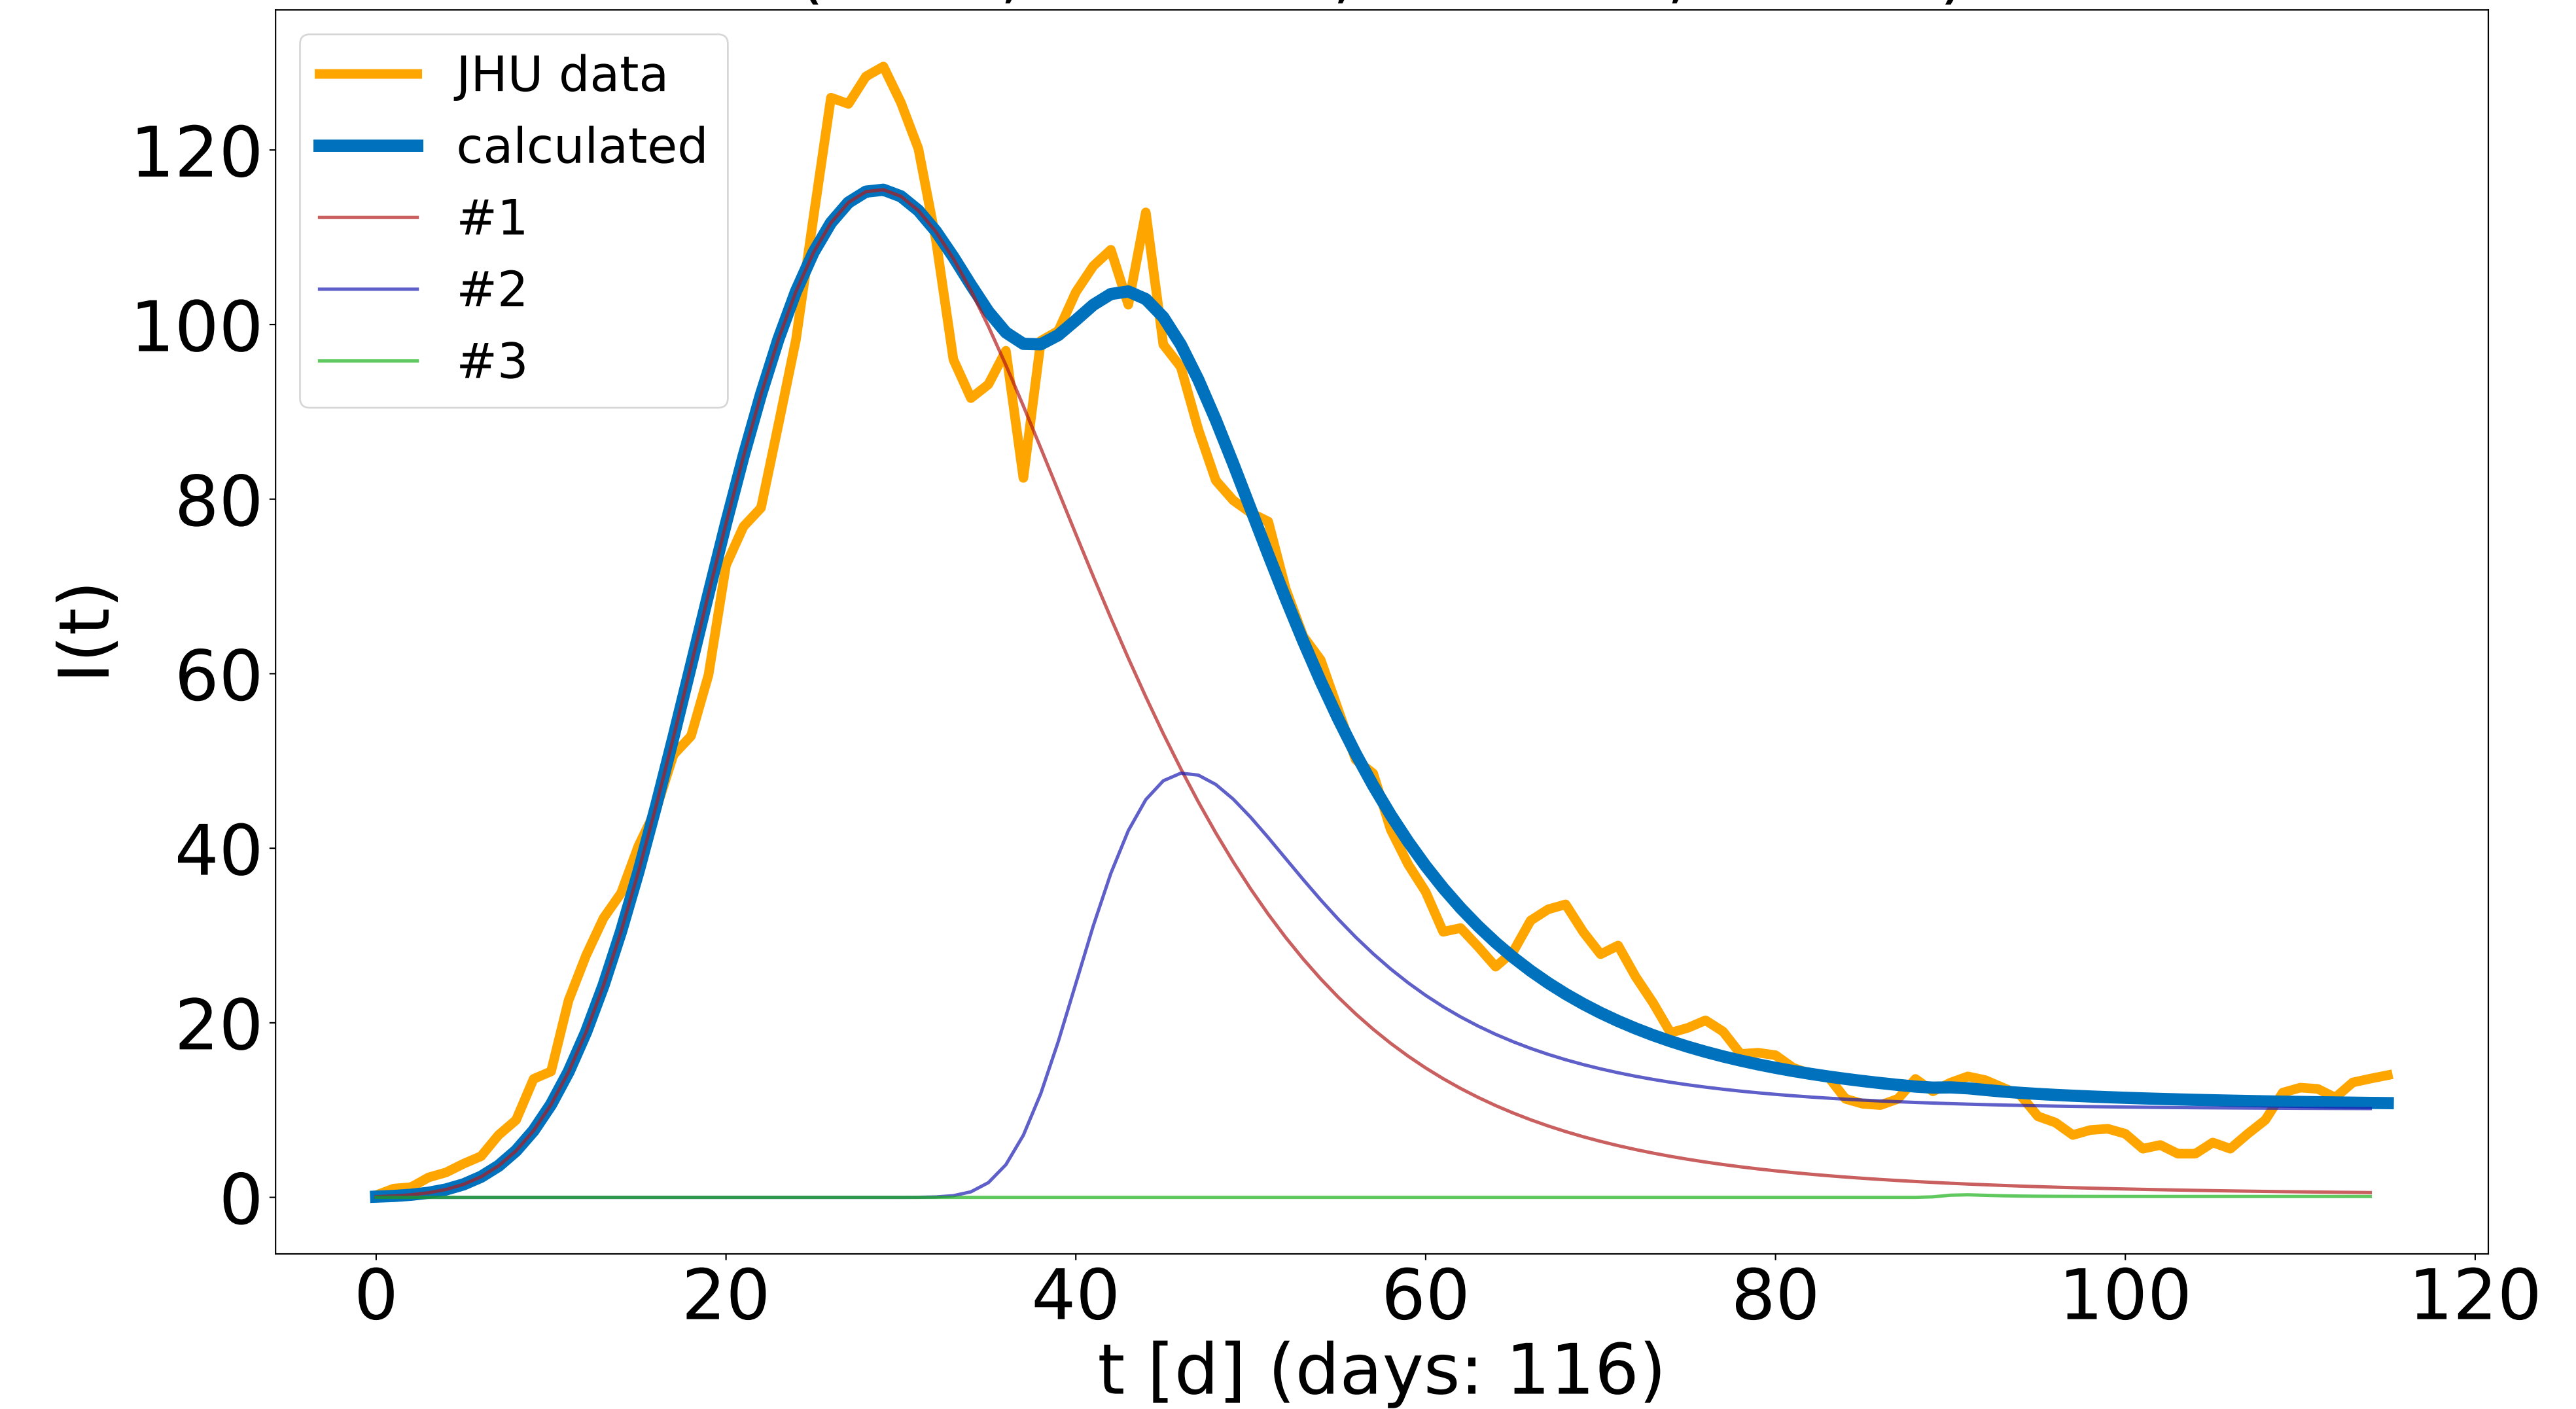

Rockland, New York, US, Rockland ( $R^2 = 0.781$ )  
(i: 0.1, a: 0.905, b: 0.04, t: 2.0)  
(i: 30.9, a: 2.0, b: 0.318, t: 45.8)  
(i: 2.5, a: 0.617, b: 1.106, t: 122.7)

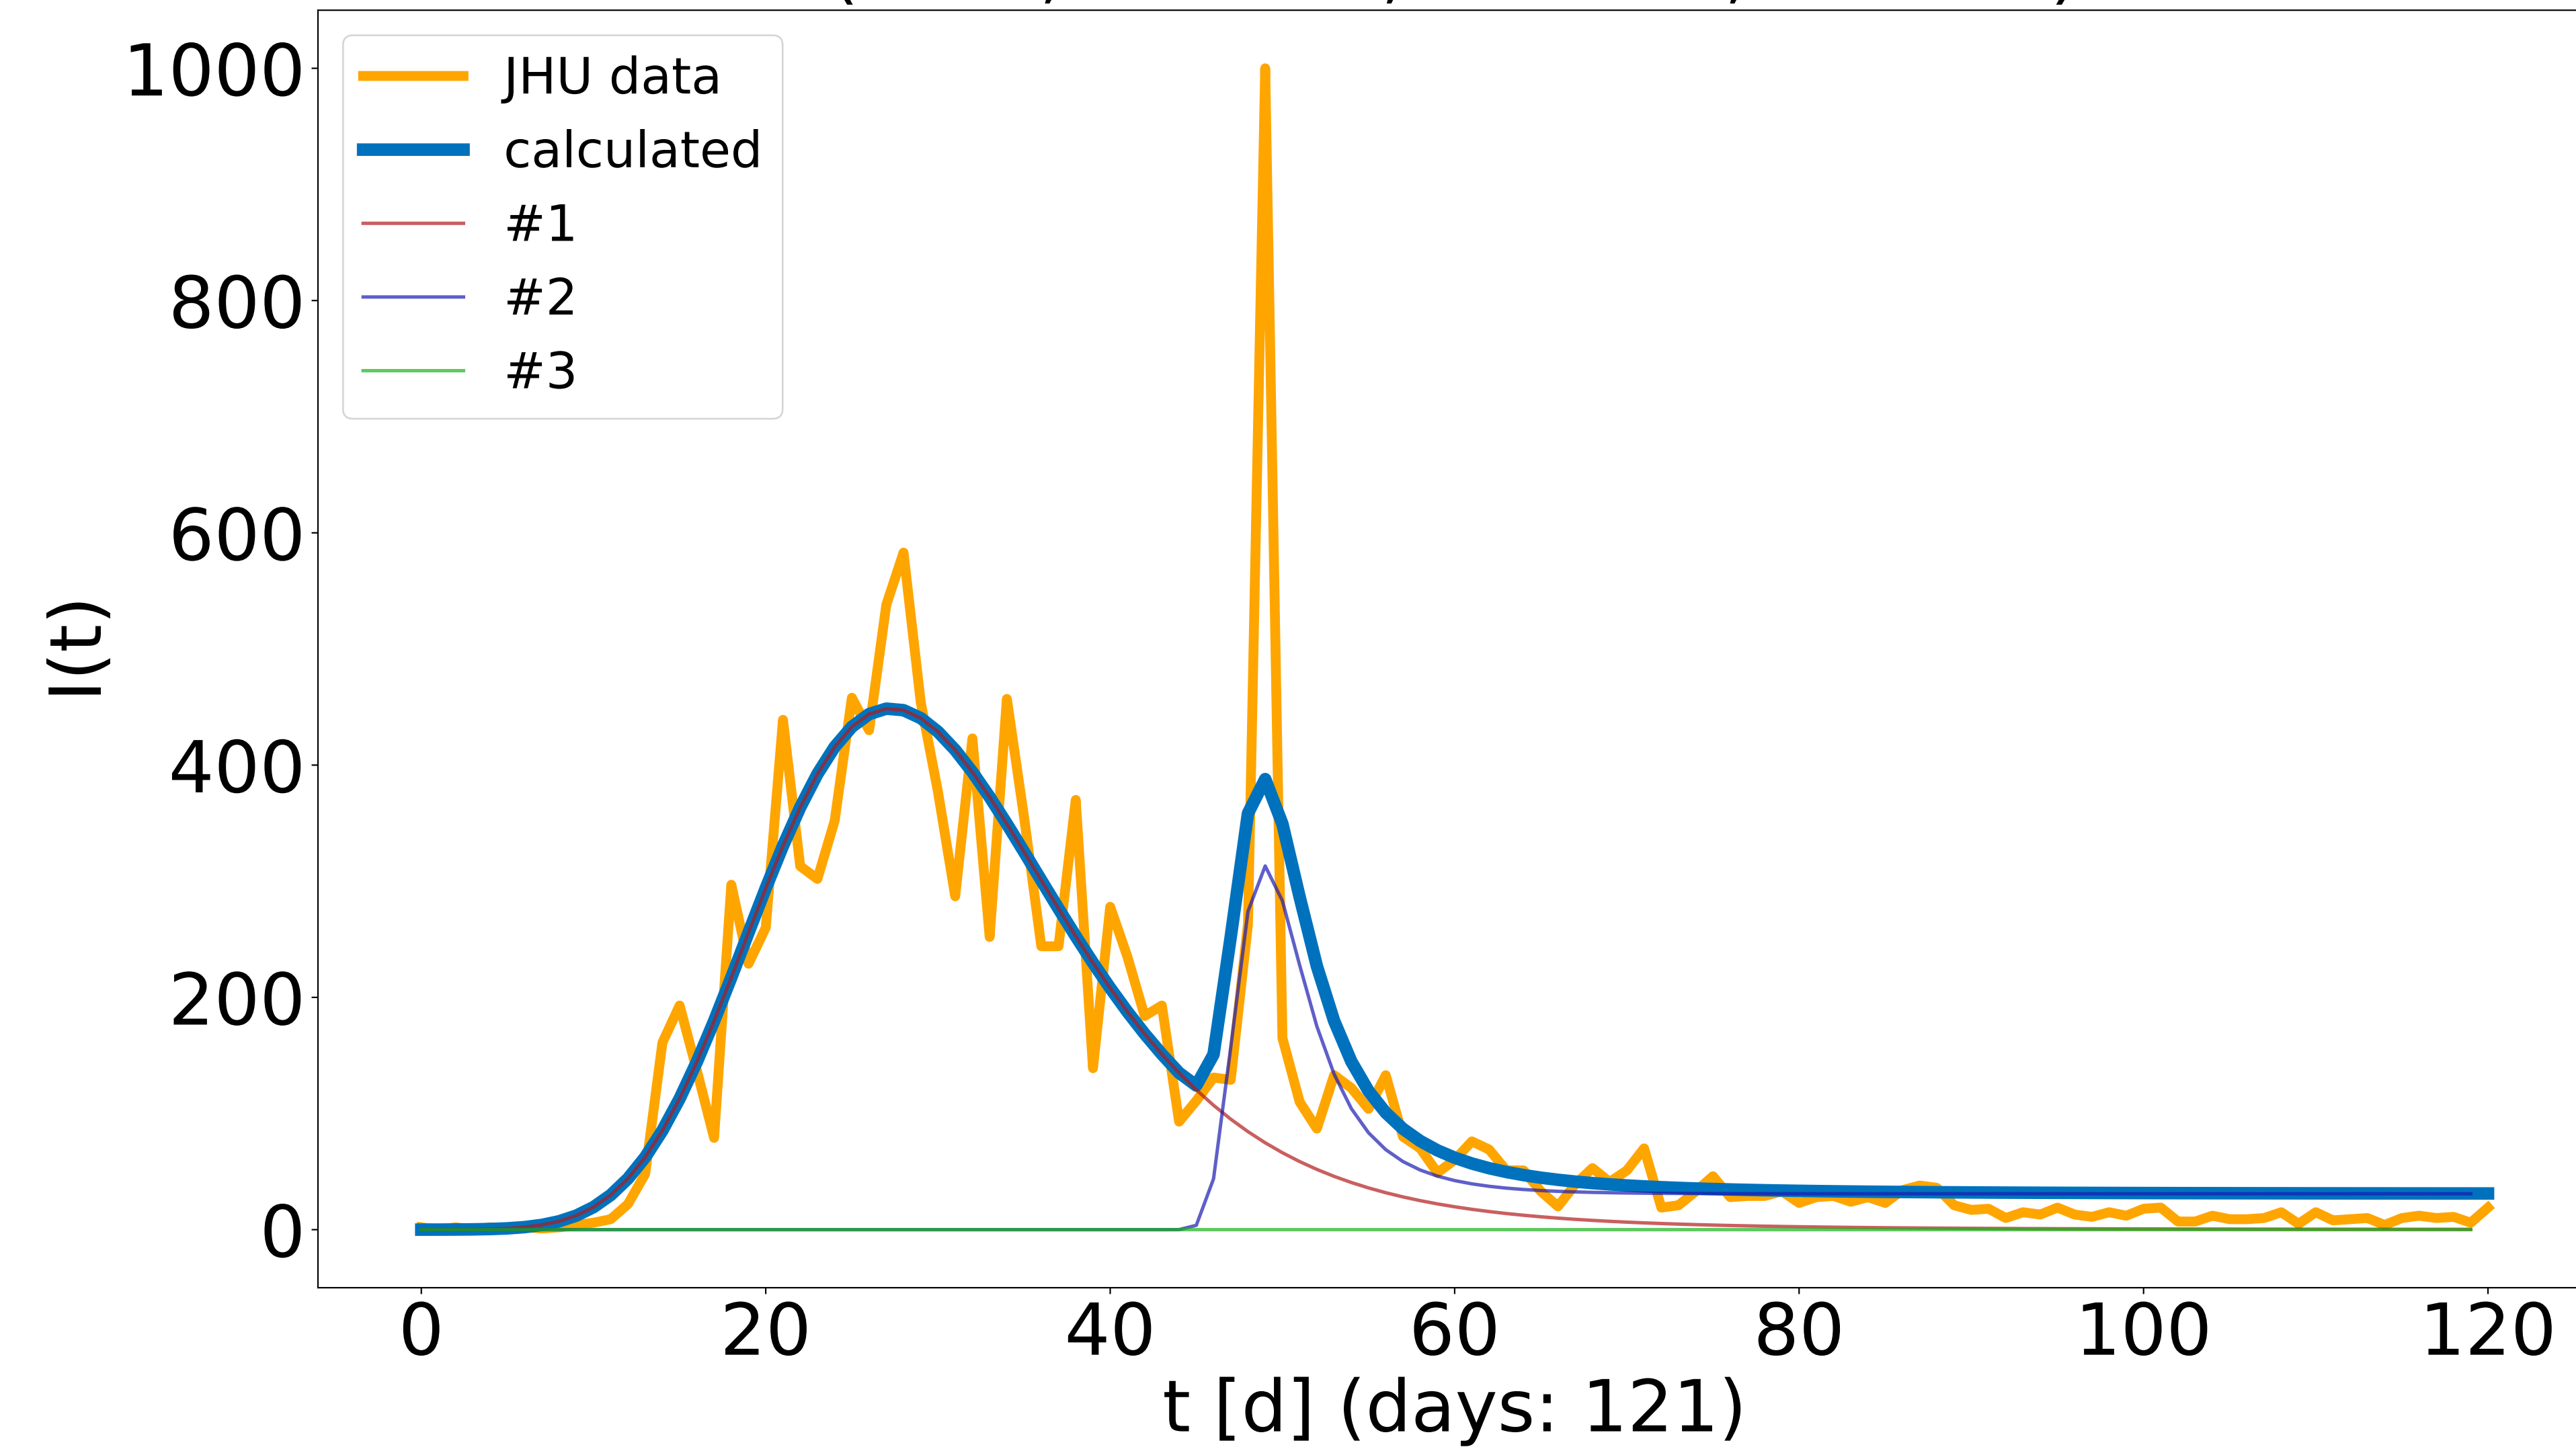

Rockland, New York, US, Rockland ( $R^2 = 0.991$ )  
(i: 1.6, a: 0.694, b: 0.046, t: 5.3)  
(i: 13.3, a: 1.612, b: 0.222, t: 44.1)  
(i: 0.6, a: 0.276, b: 1.163, t: 123.1)

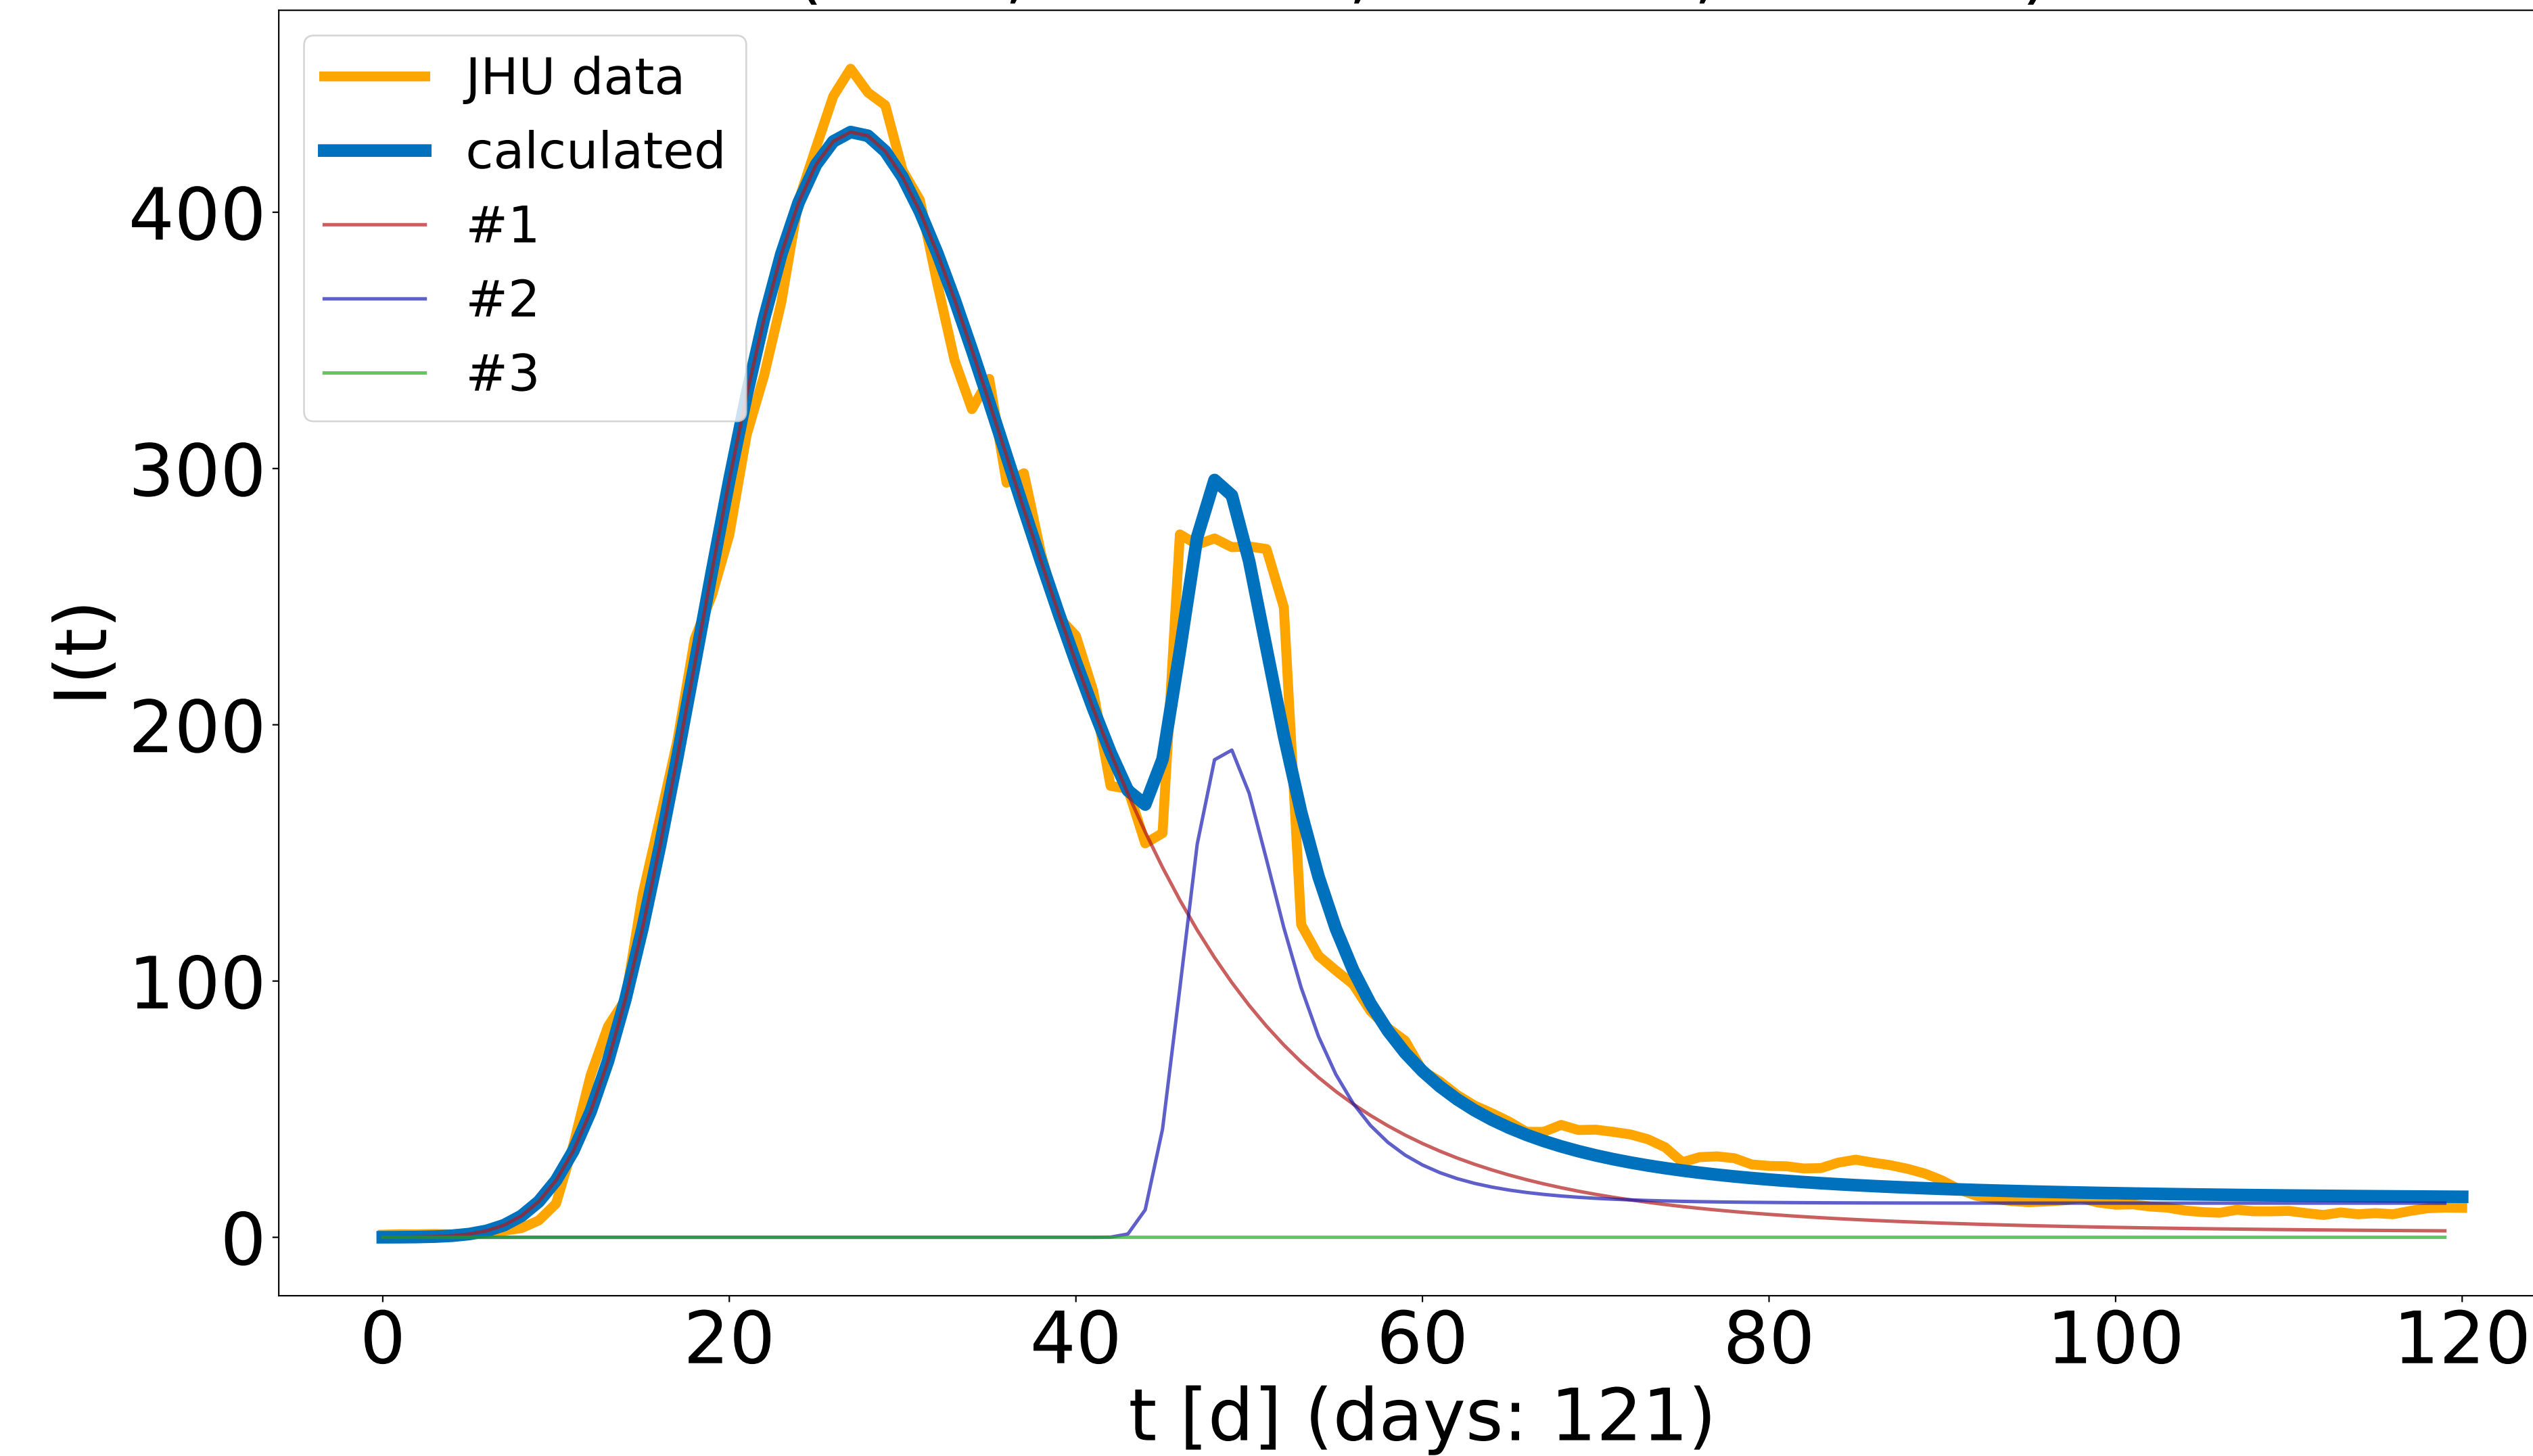

Westchester, New York, US, Westchester ( $R^2 = 0.827$ )

(i: 0.7, a: 0.522, b: 0.028, t: 1.0)

(i: 18.5, a: 2.0, b: 0.198, t: 16.5)

(i: 10.0, a: 2.0, b: 1.1, t: 84.9)

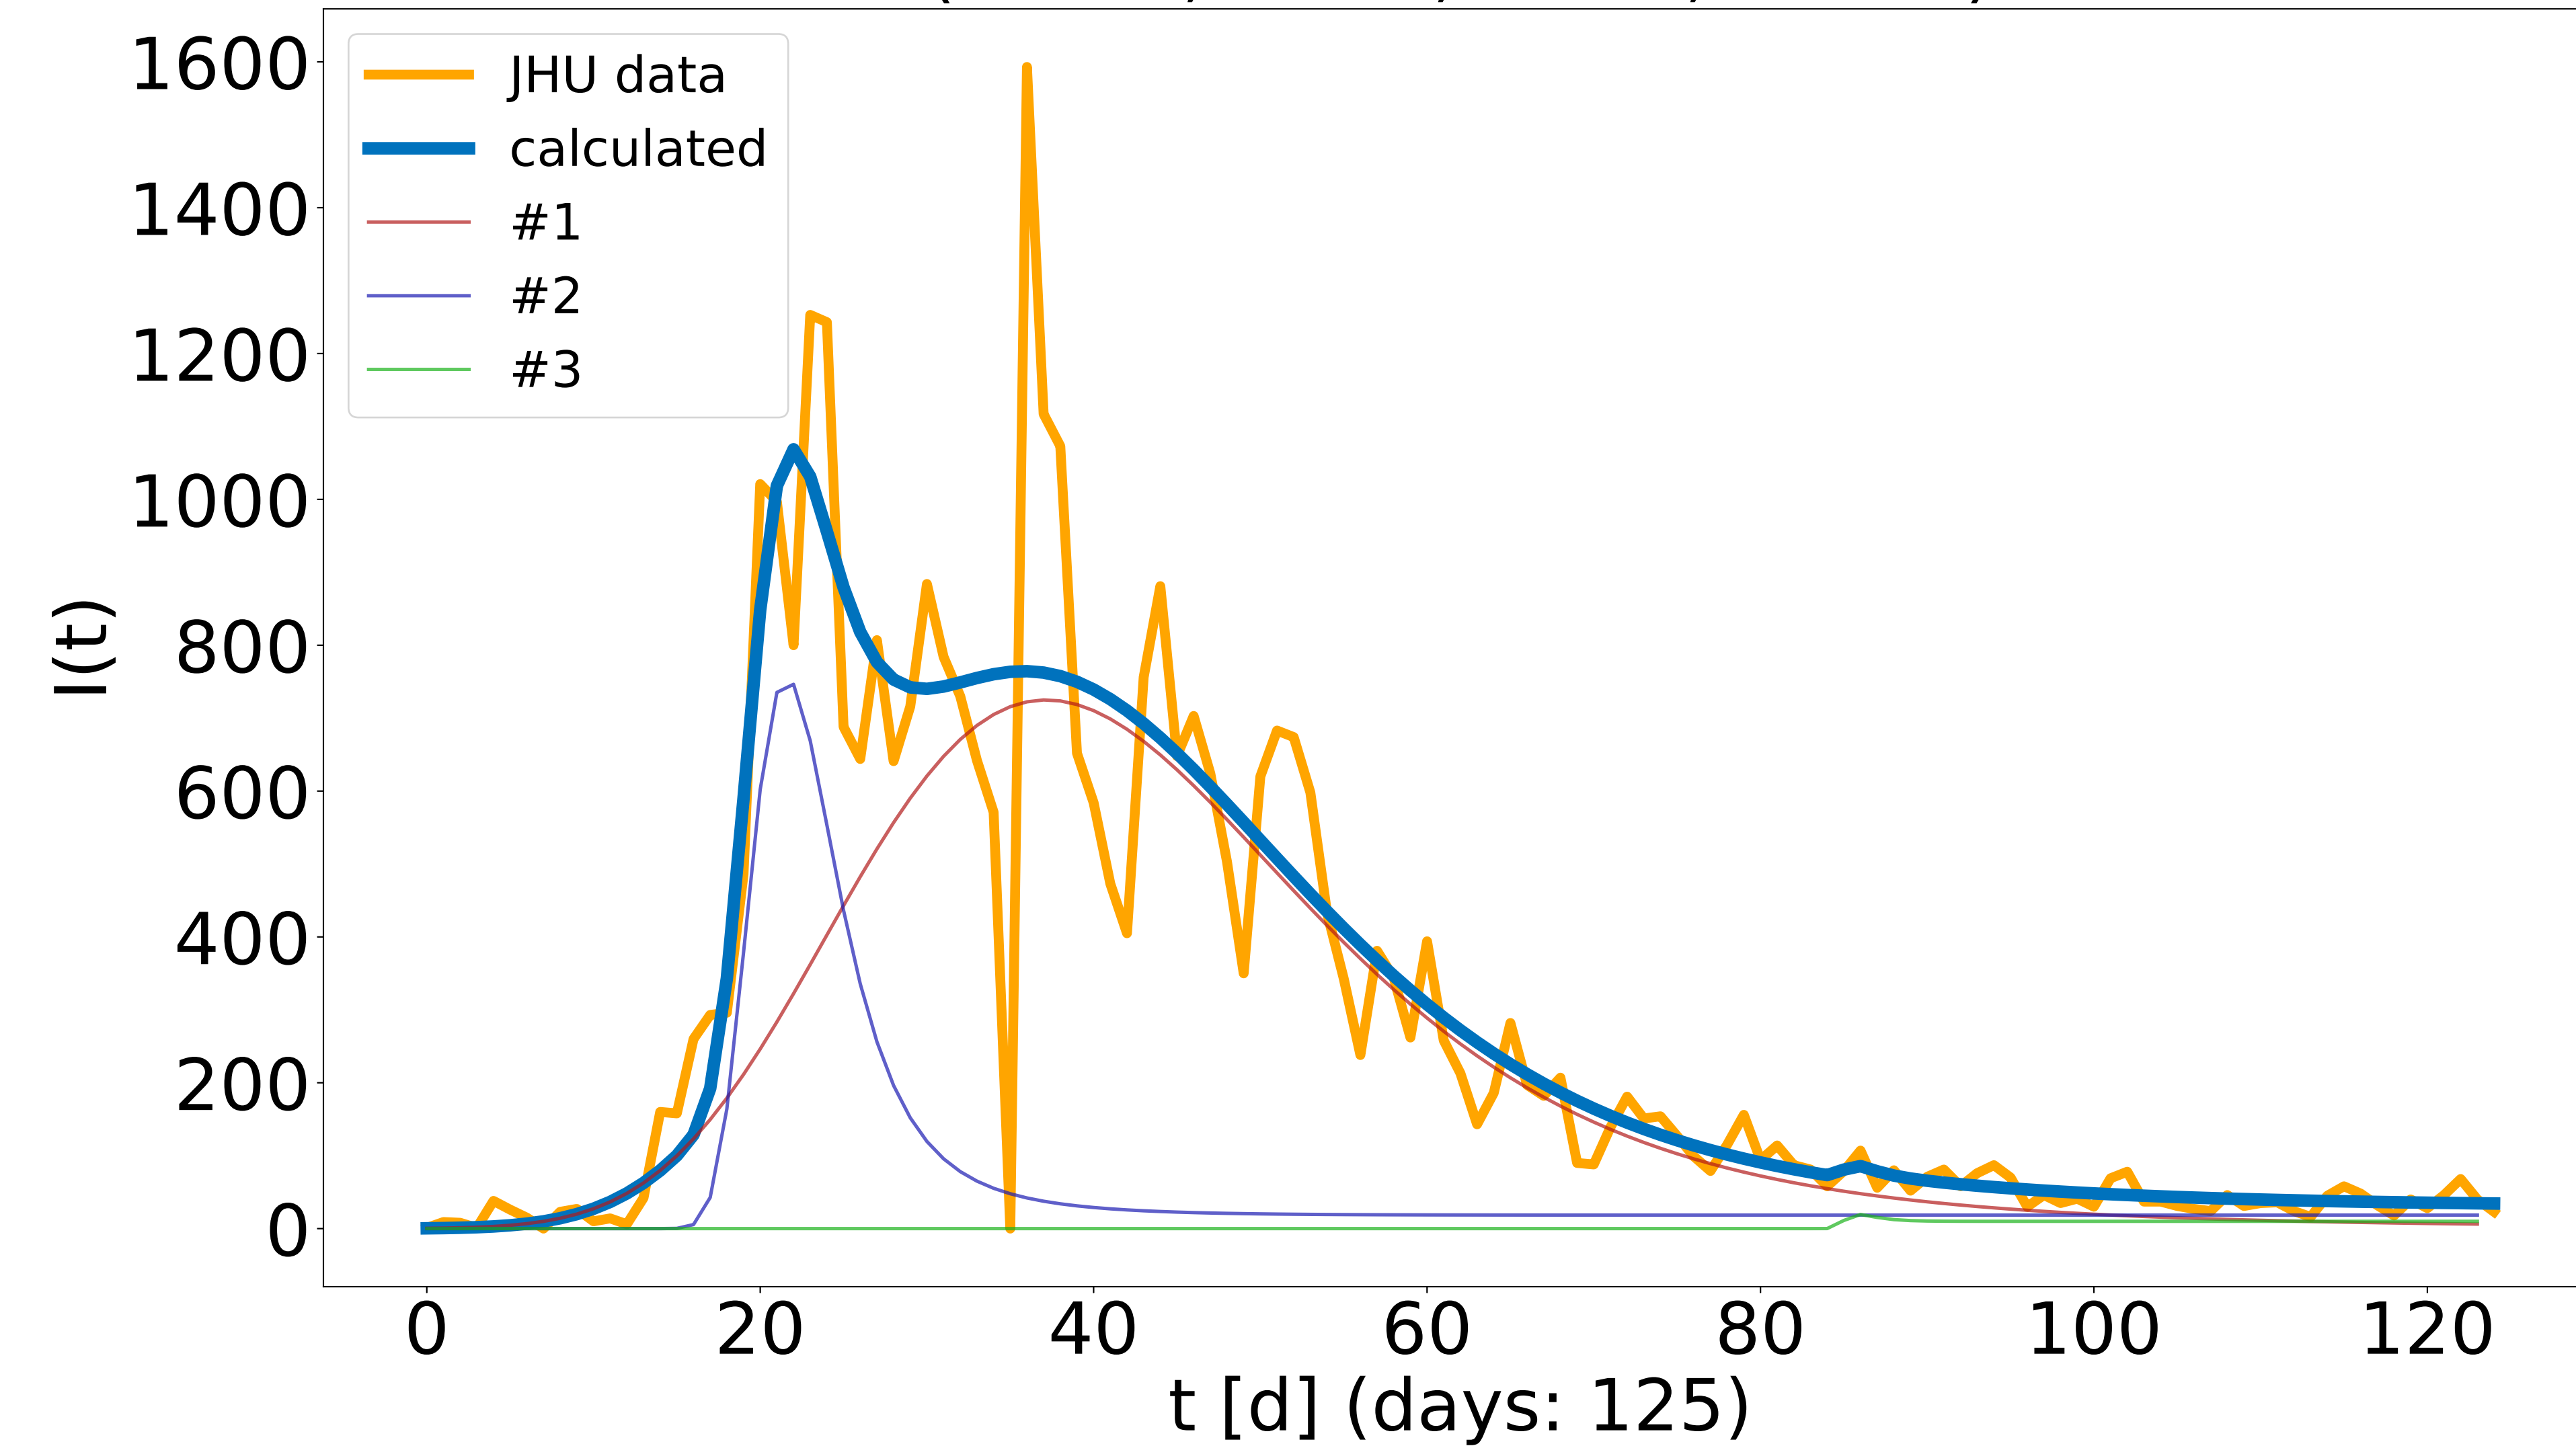

Westchester, New York, US, Westchester ( $R^2 = 0.996$ )

(i: 0.1, a: 1.462, b: 0.059, t: 6.6)

(i: 0.1, a: 1.632, b: 0.069, t: 22.9)

(i: 45.1, a: 0.553, b: 0.088, t: 38.9)

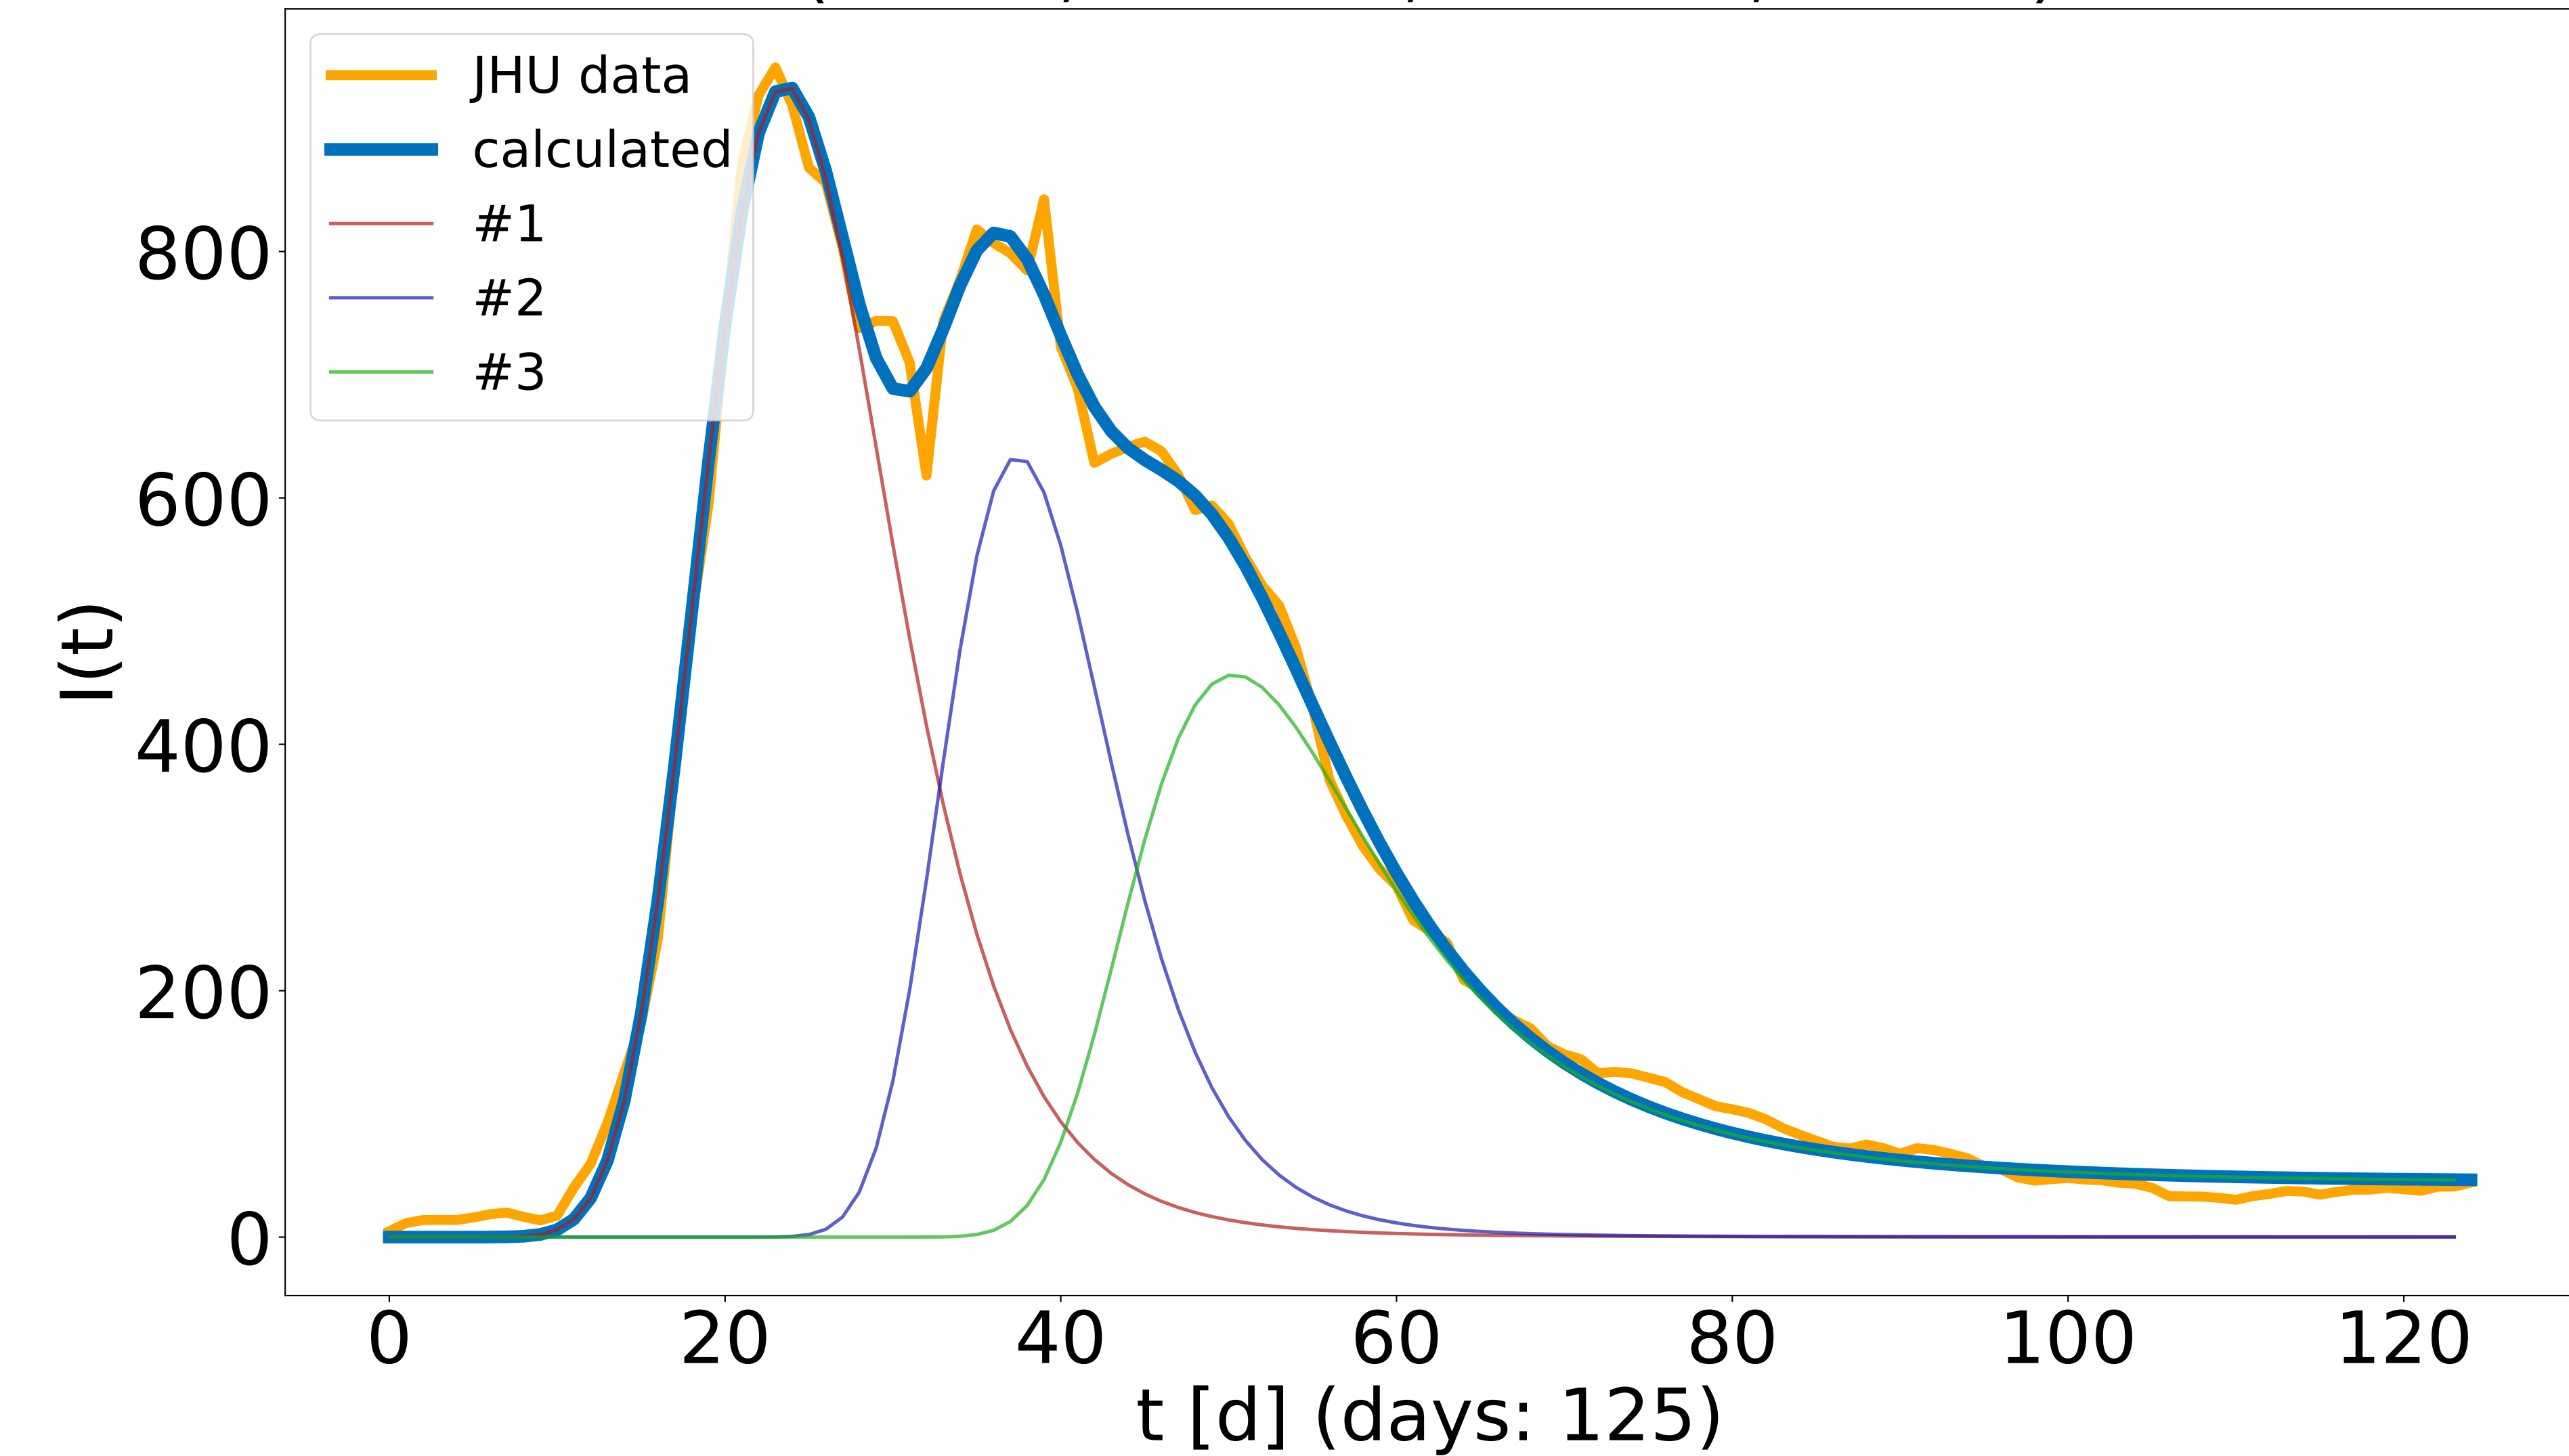



Durham, North Carolina, US, Durham ( $R^2 = 0.533$ )

(i: 12.5, a: 0.363, b: 1.399, t: 19.3)

(i: 8.4, a: 2.0, b: 1.226, t: 32.4)

(i: 24.6, a: 0.131, b: 0.06, t: 74.9)

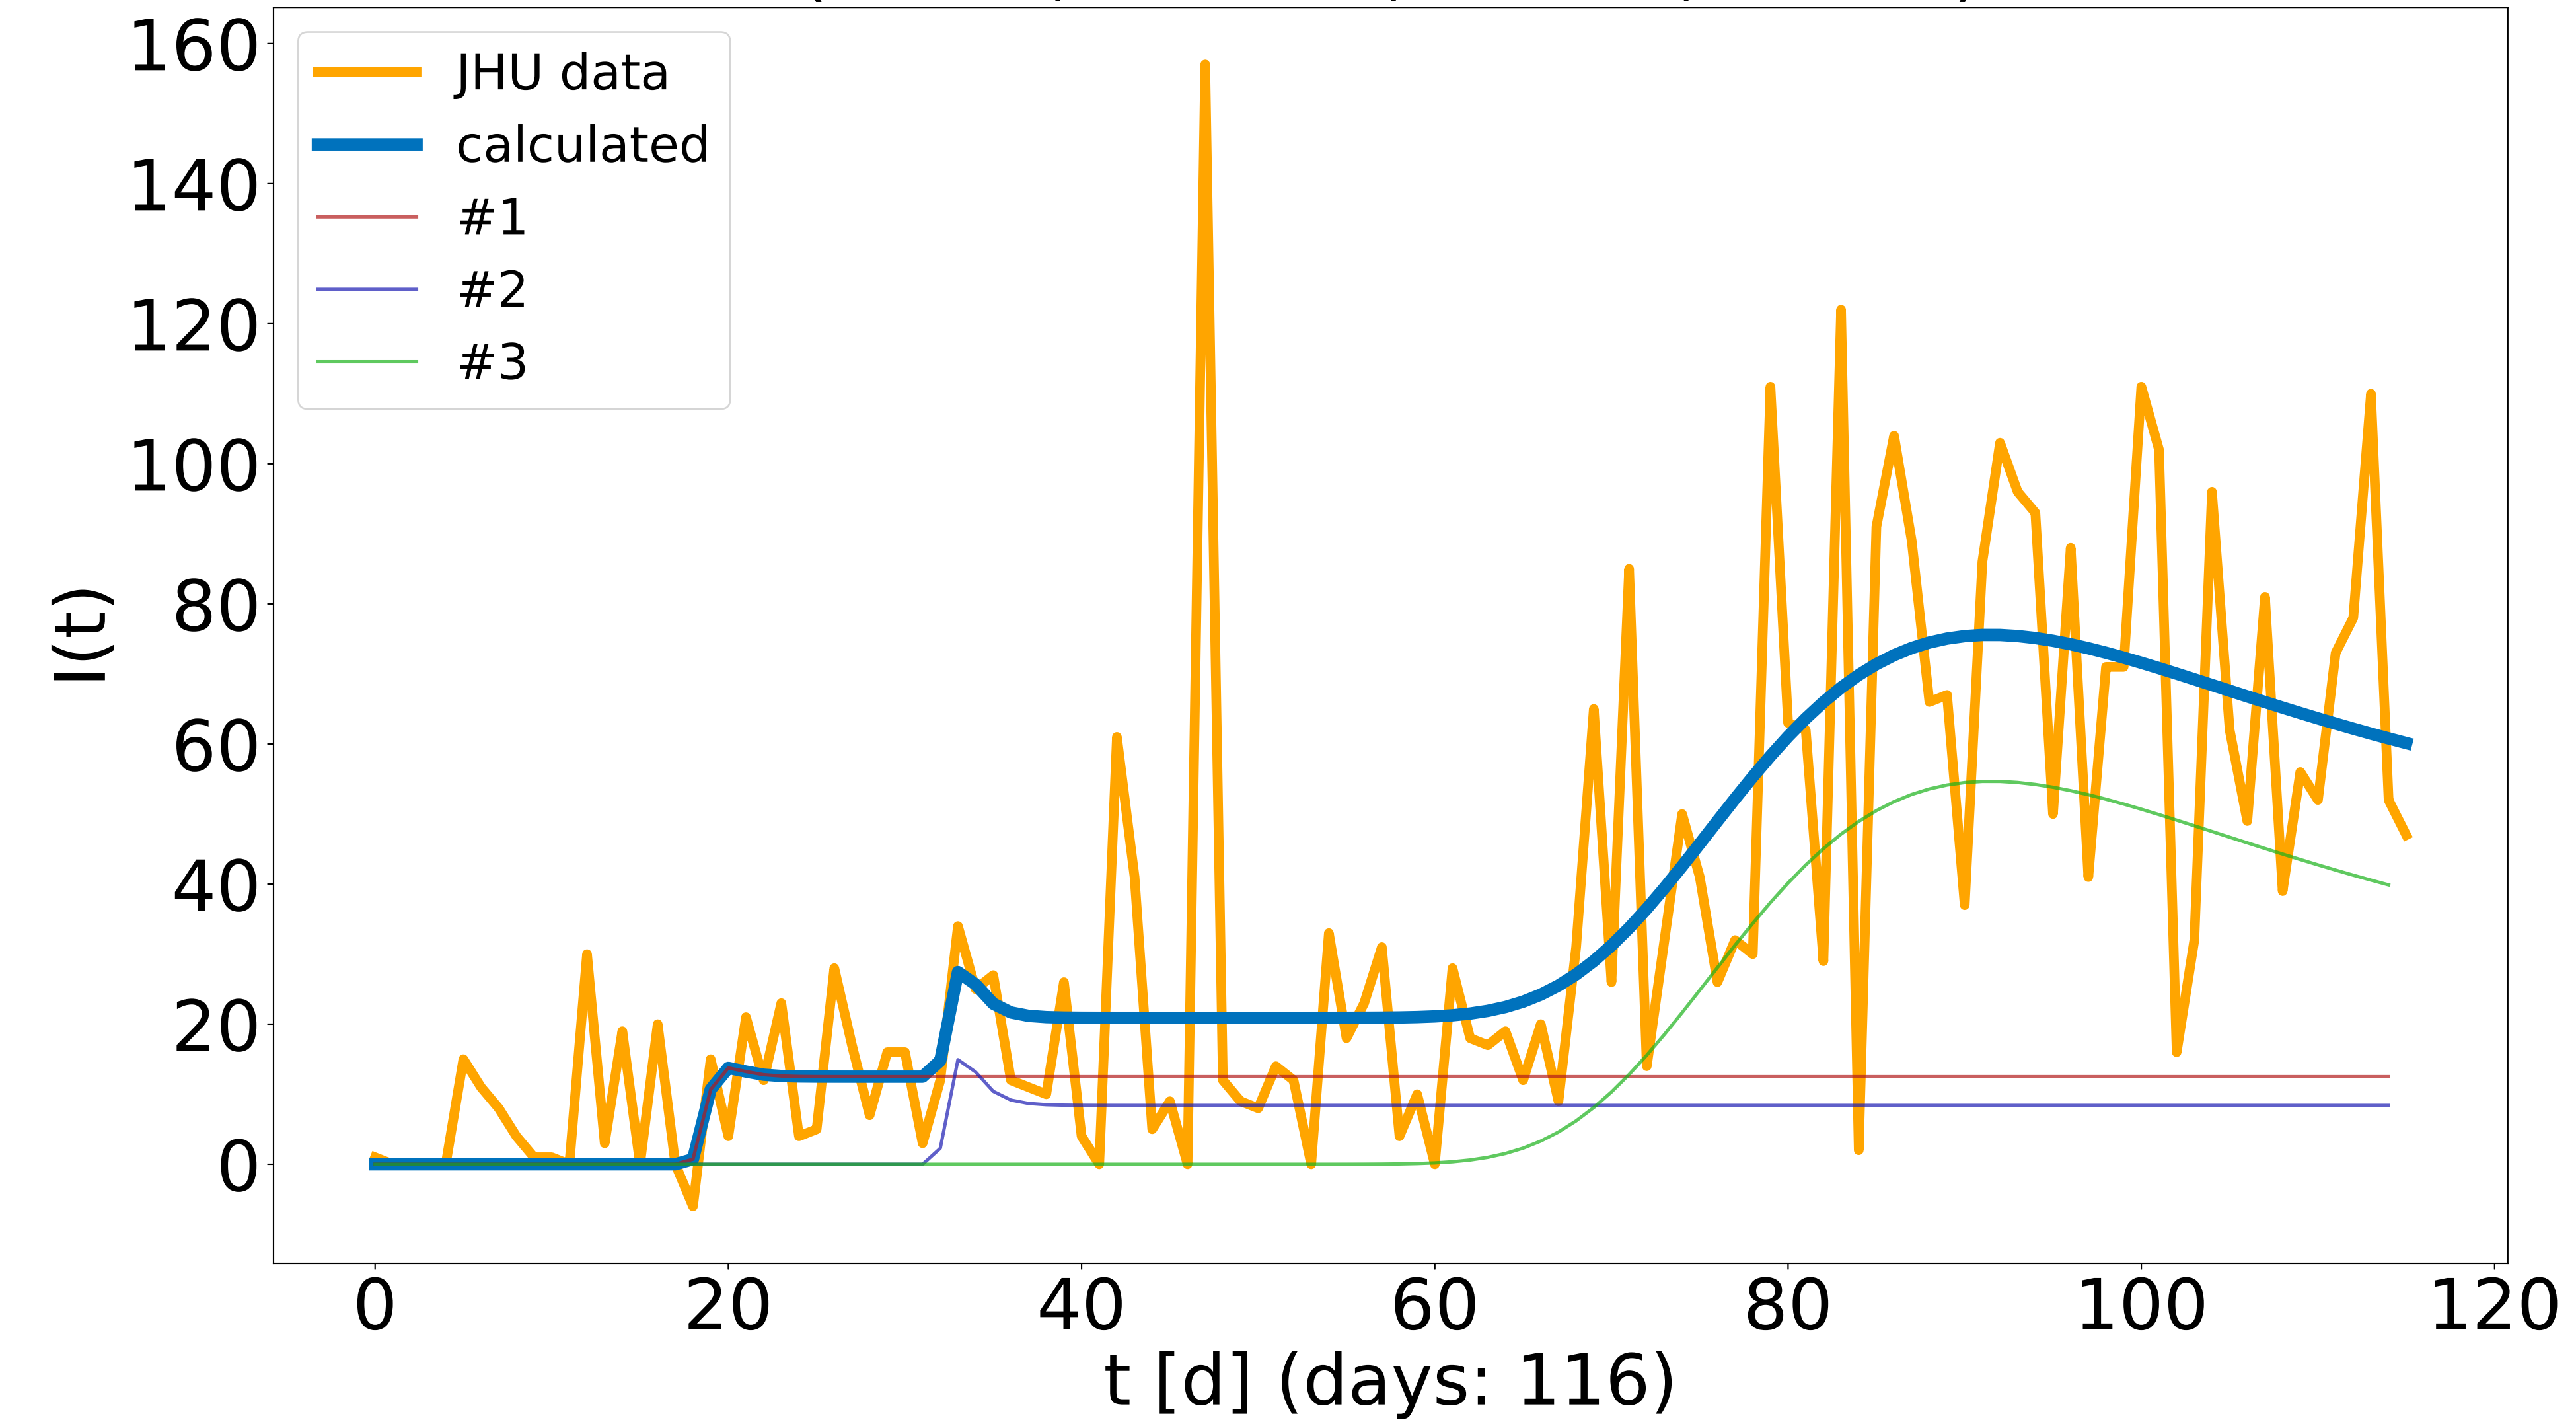

Durham, North Carolina, US, Durham ( $R^2 = 0.971$ )

(i: 1.9, a: 0.163, b: 0.028, t: 1.0)

(i: 2.7, a: 2.0, b: 0.351, t: 42.3)

(i: 40.5, a: 0.077, b: 0.059, t: 76.5)

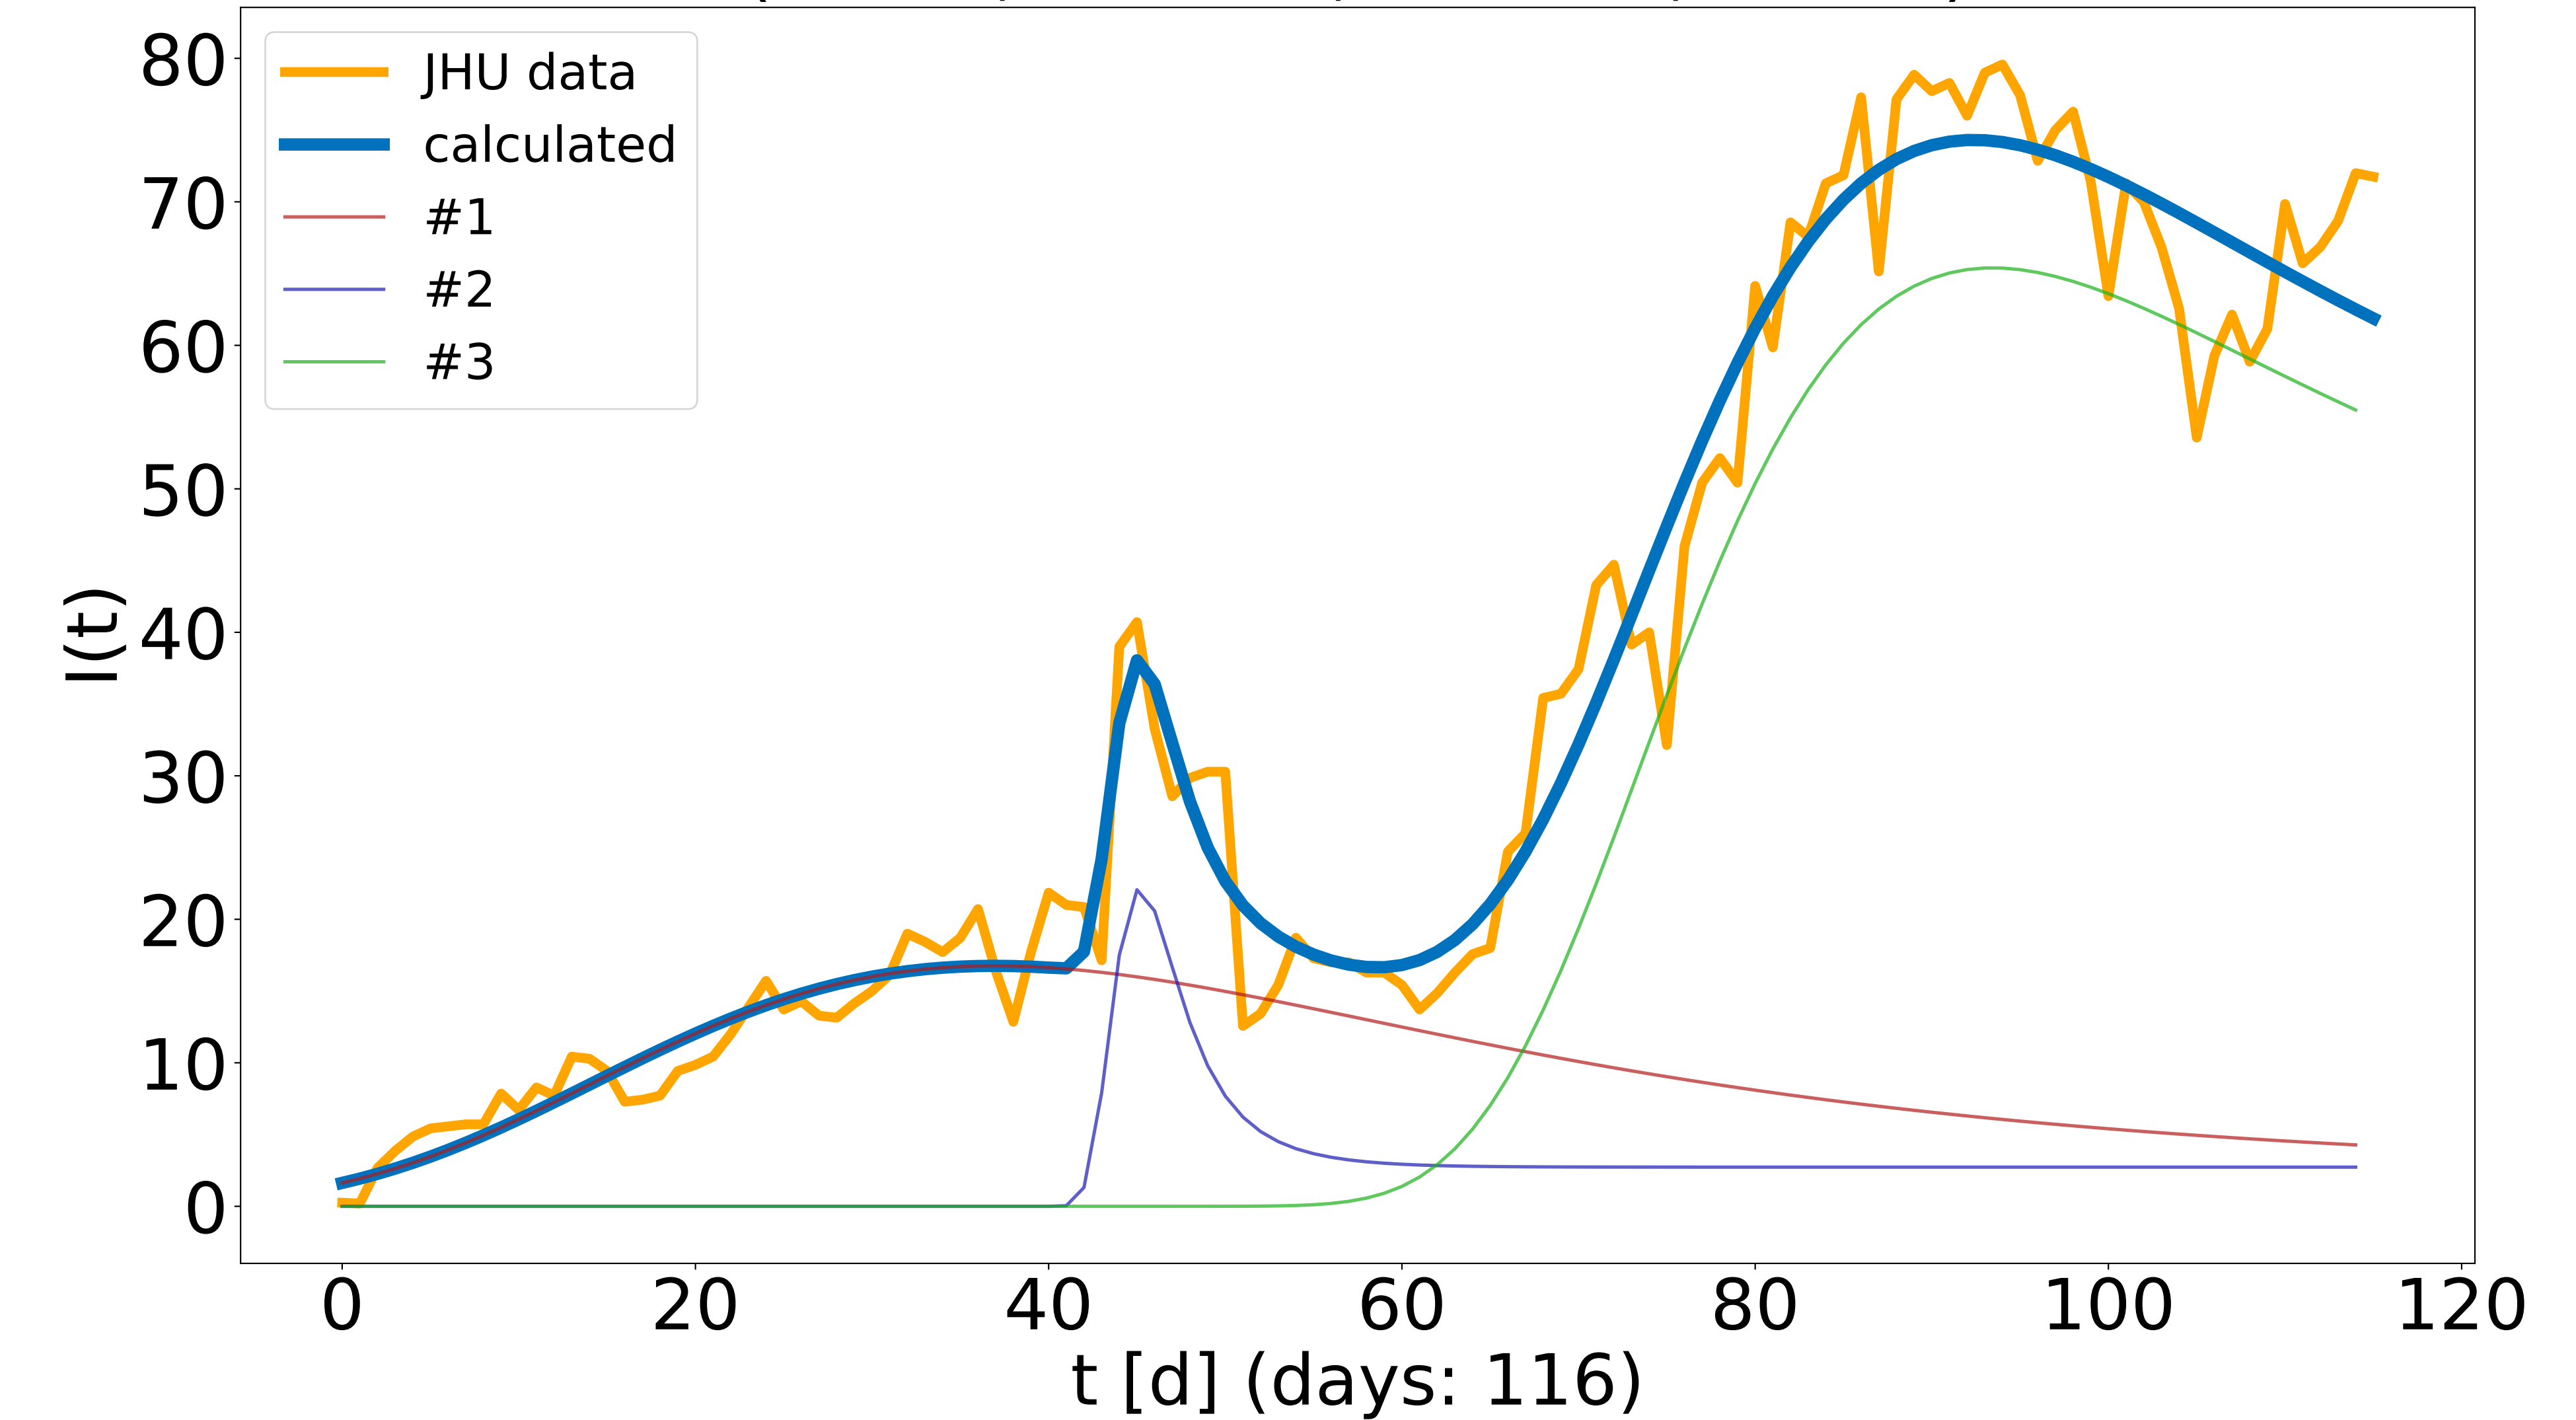



Cuyahoga, Ohio, US, Cuyahoga ( $R^2 = 0.575$ )  
(i: 4.4, a: 0.39, b: 0.056, t: 5.0)  
(i: 0.1, a: 0.326, b: 0.018, t: 14.5)  
(i: 172.6, a: 0.001, b: 0.137, t: 130.4)

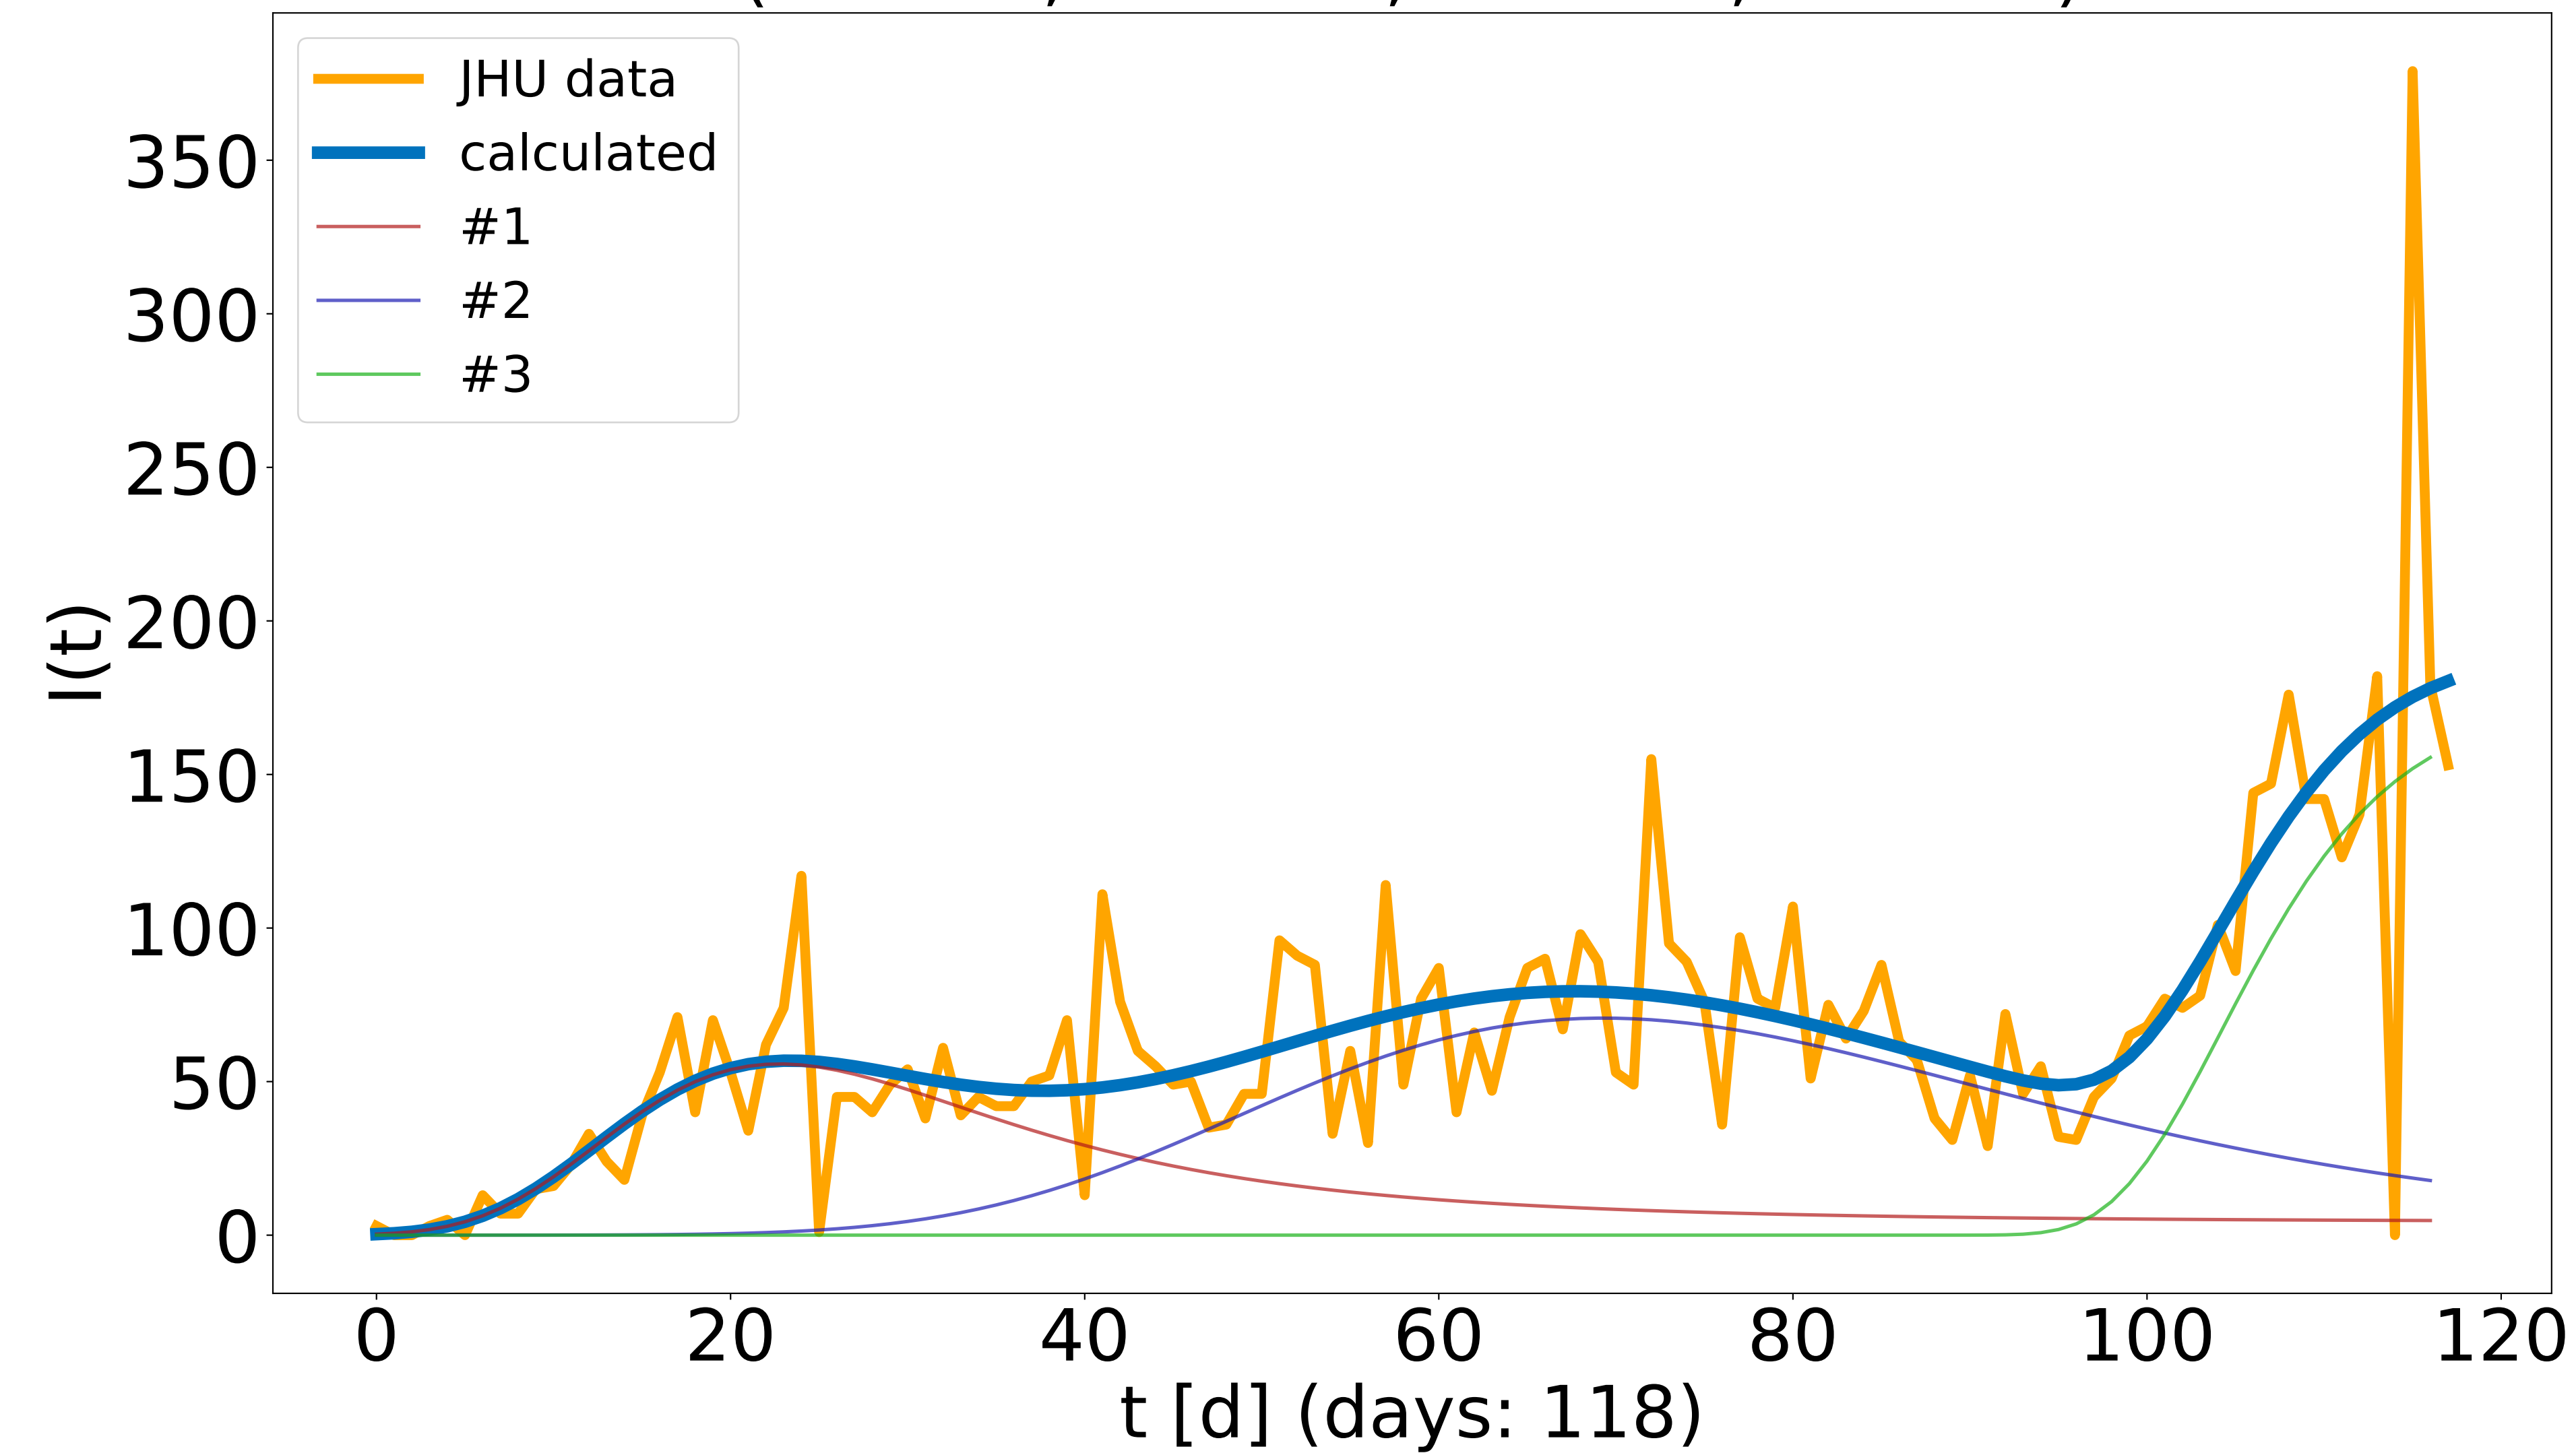

Cuyahoga, Ohio, US, Cuyahoga ( $R^2 = 0.972$ )  
(i: 4.5, a: 0.355, b: 0.052, t: 4.3)  
(i: 0.1, a: 0.328, b: 0.018, t: 15.8)  
(i: 161.5, a: 0.001, b: 0.144, t: 128.9)

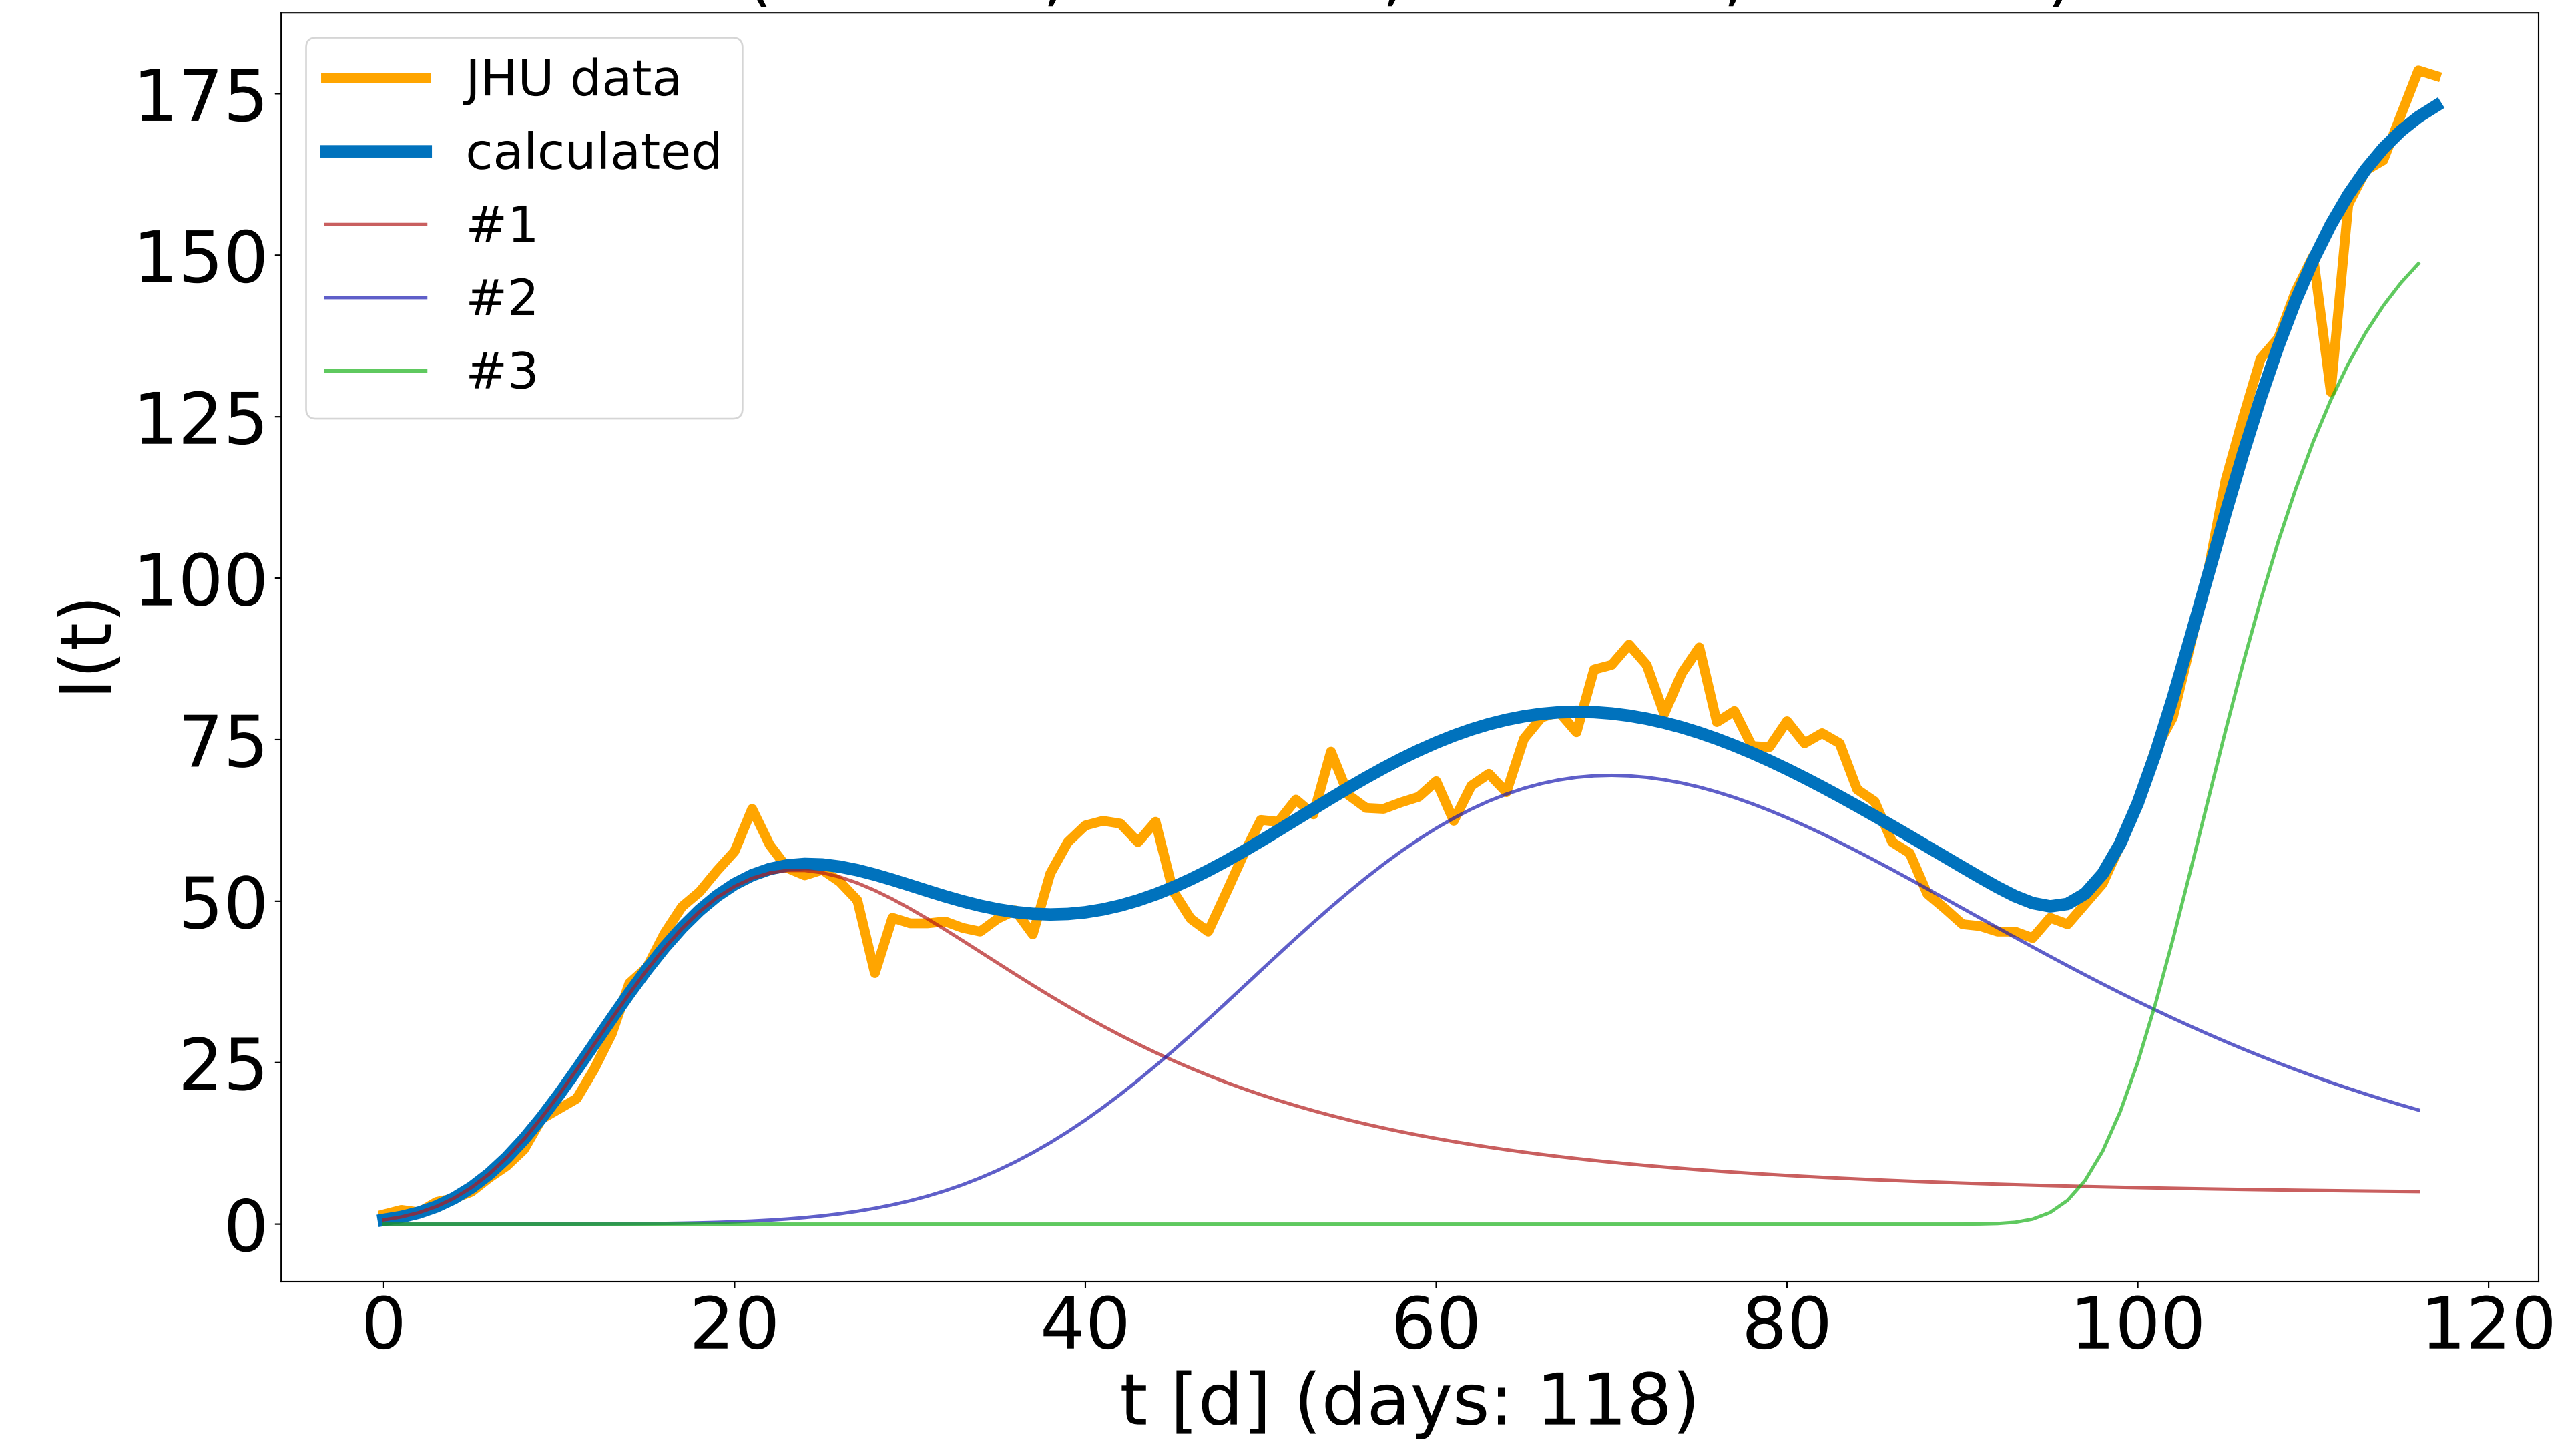

Franklin, Ohio, US, Franklin ( $R^2 = 0.611$ )  
(i: 4.2, a: 0.214, b: 0.028, t: 1.0)  
(i: 62.3, a: 2.0, b: 1.011, t: 46.0)  
(i: 1639.5, a: 0.057, b: 0.013, t: 140.0)

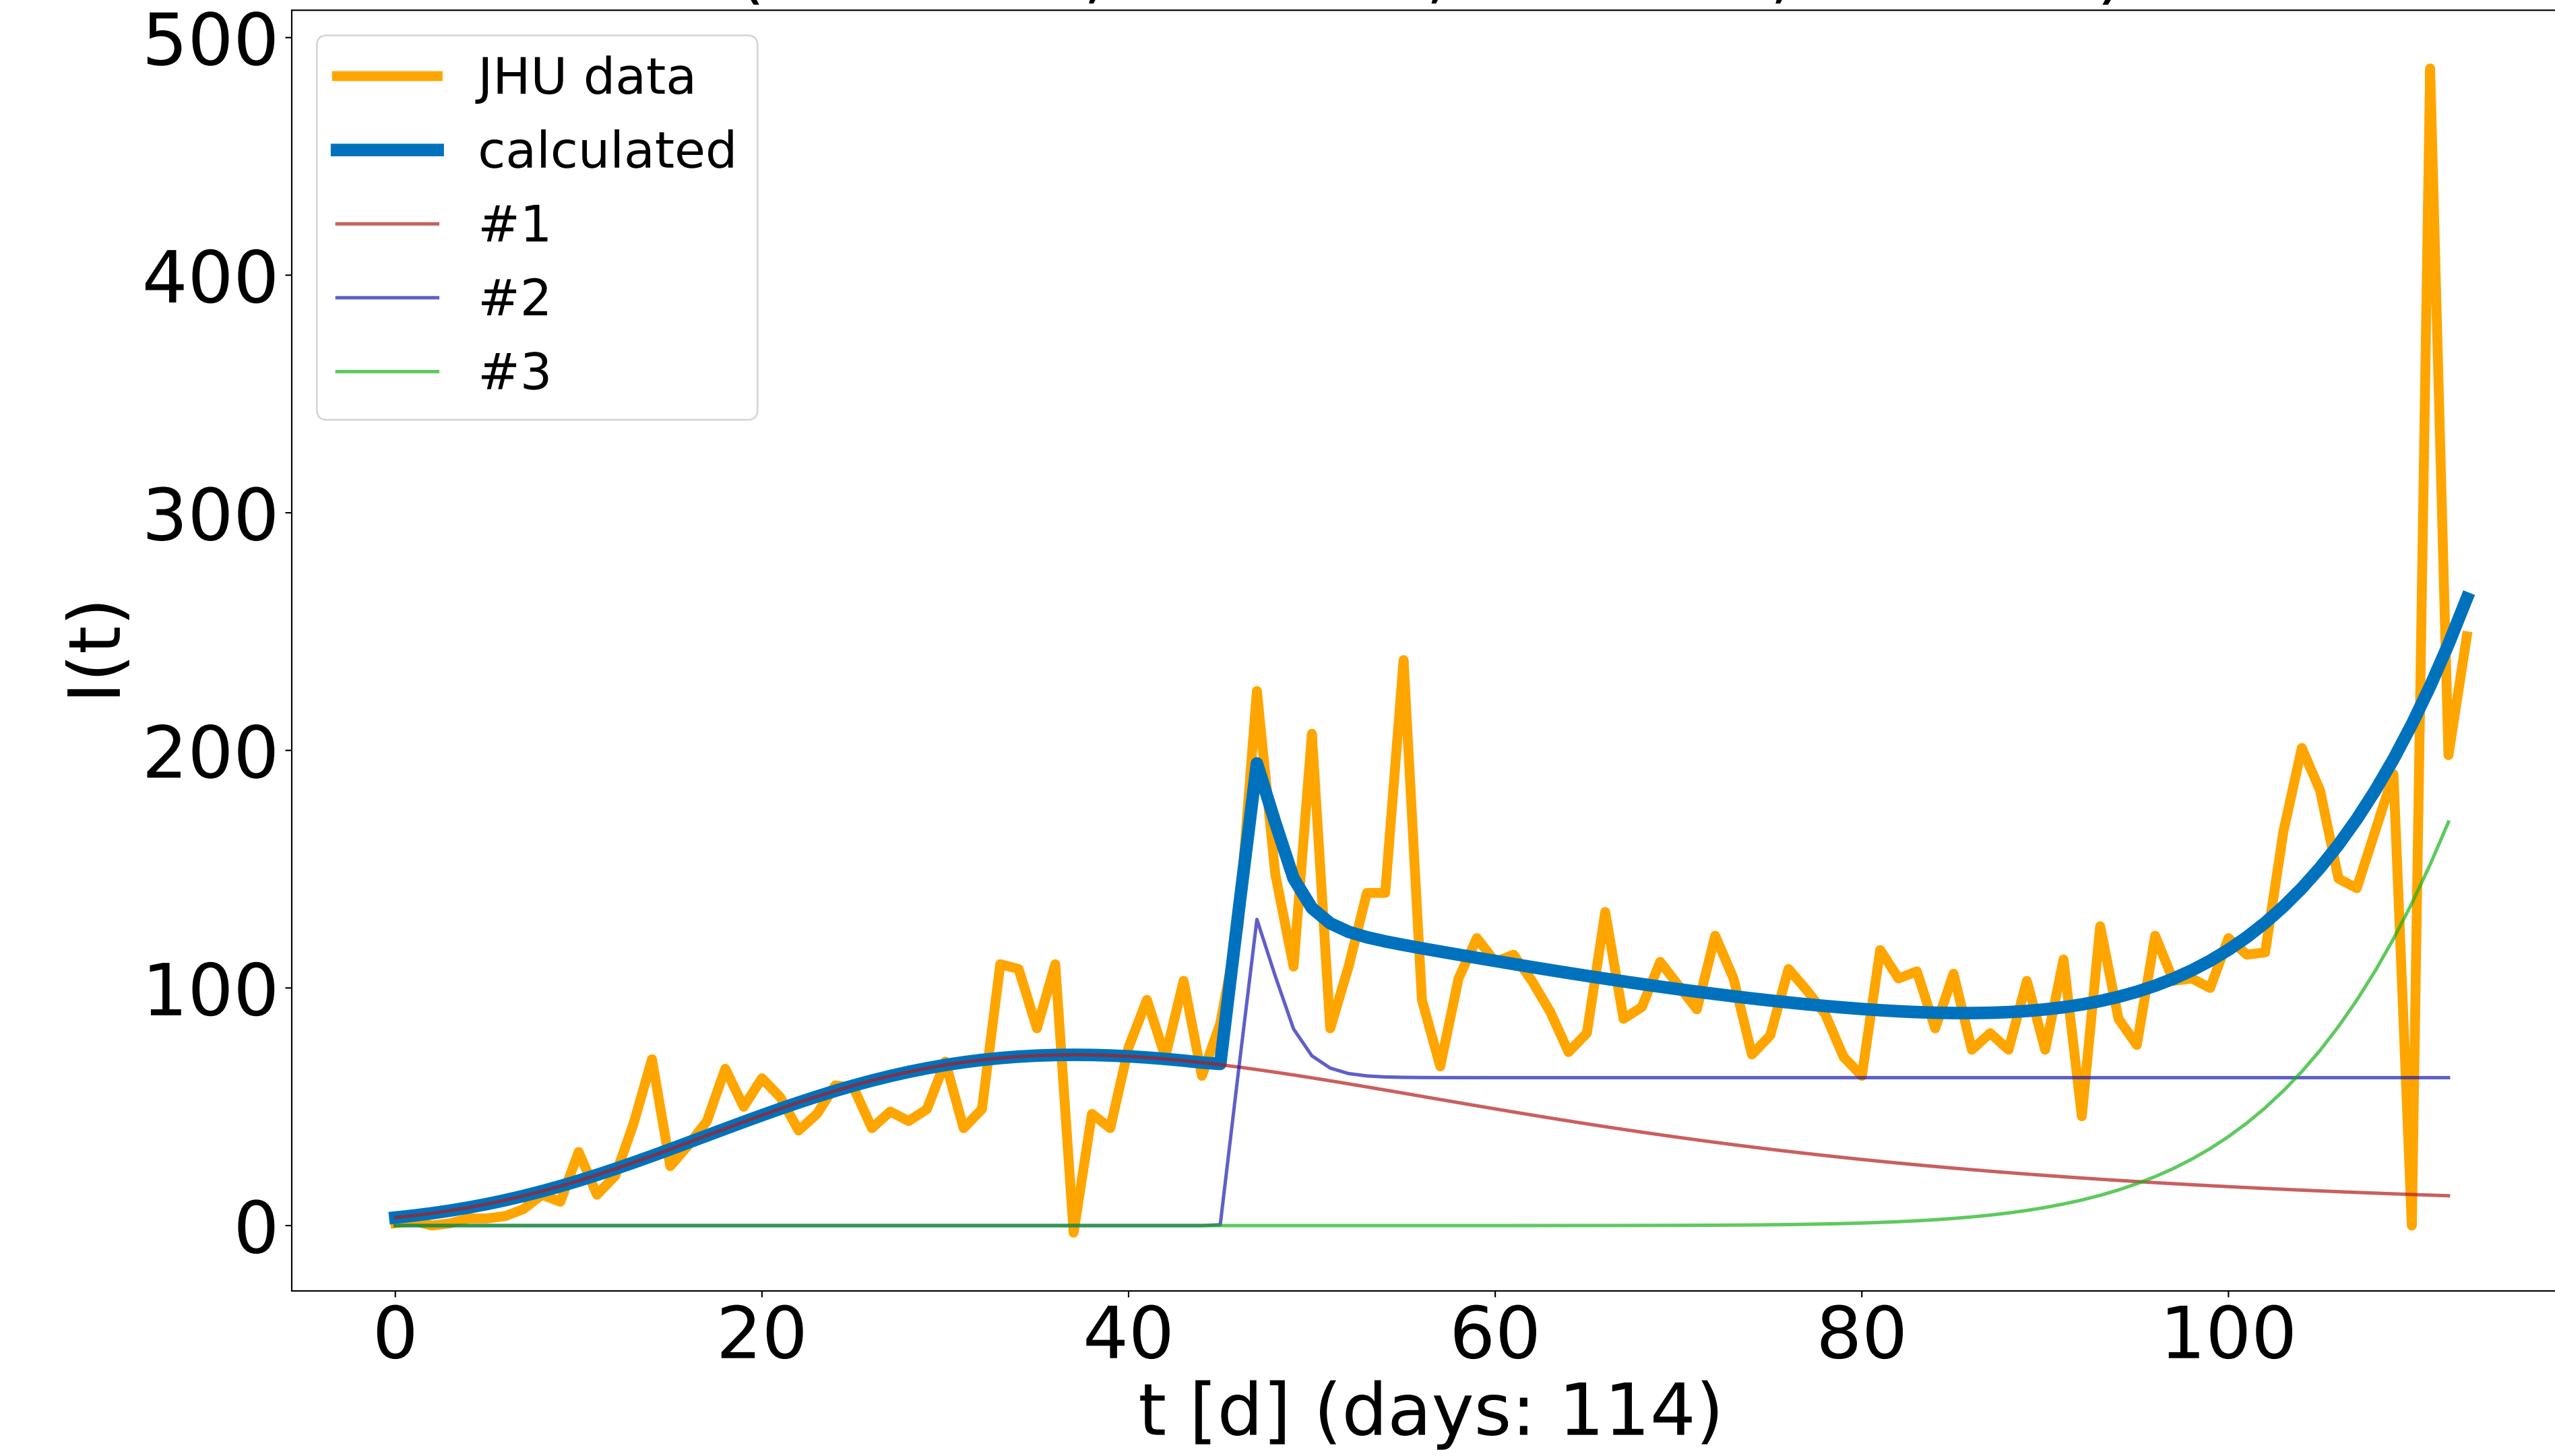

Franklin, Ohio, US, Franklin ( $R^2 = 0.985$ )  
(i: 64.8, a: 0.001, b: 0.113, t: 41.5)  
(i: 24.0, a: 0.507, b: 0.155, t: 43.0)  
(i: 257.1, a: 0.004, b: 0.068, t: 140.0)

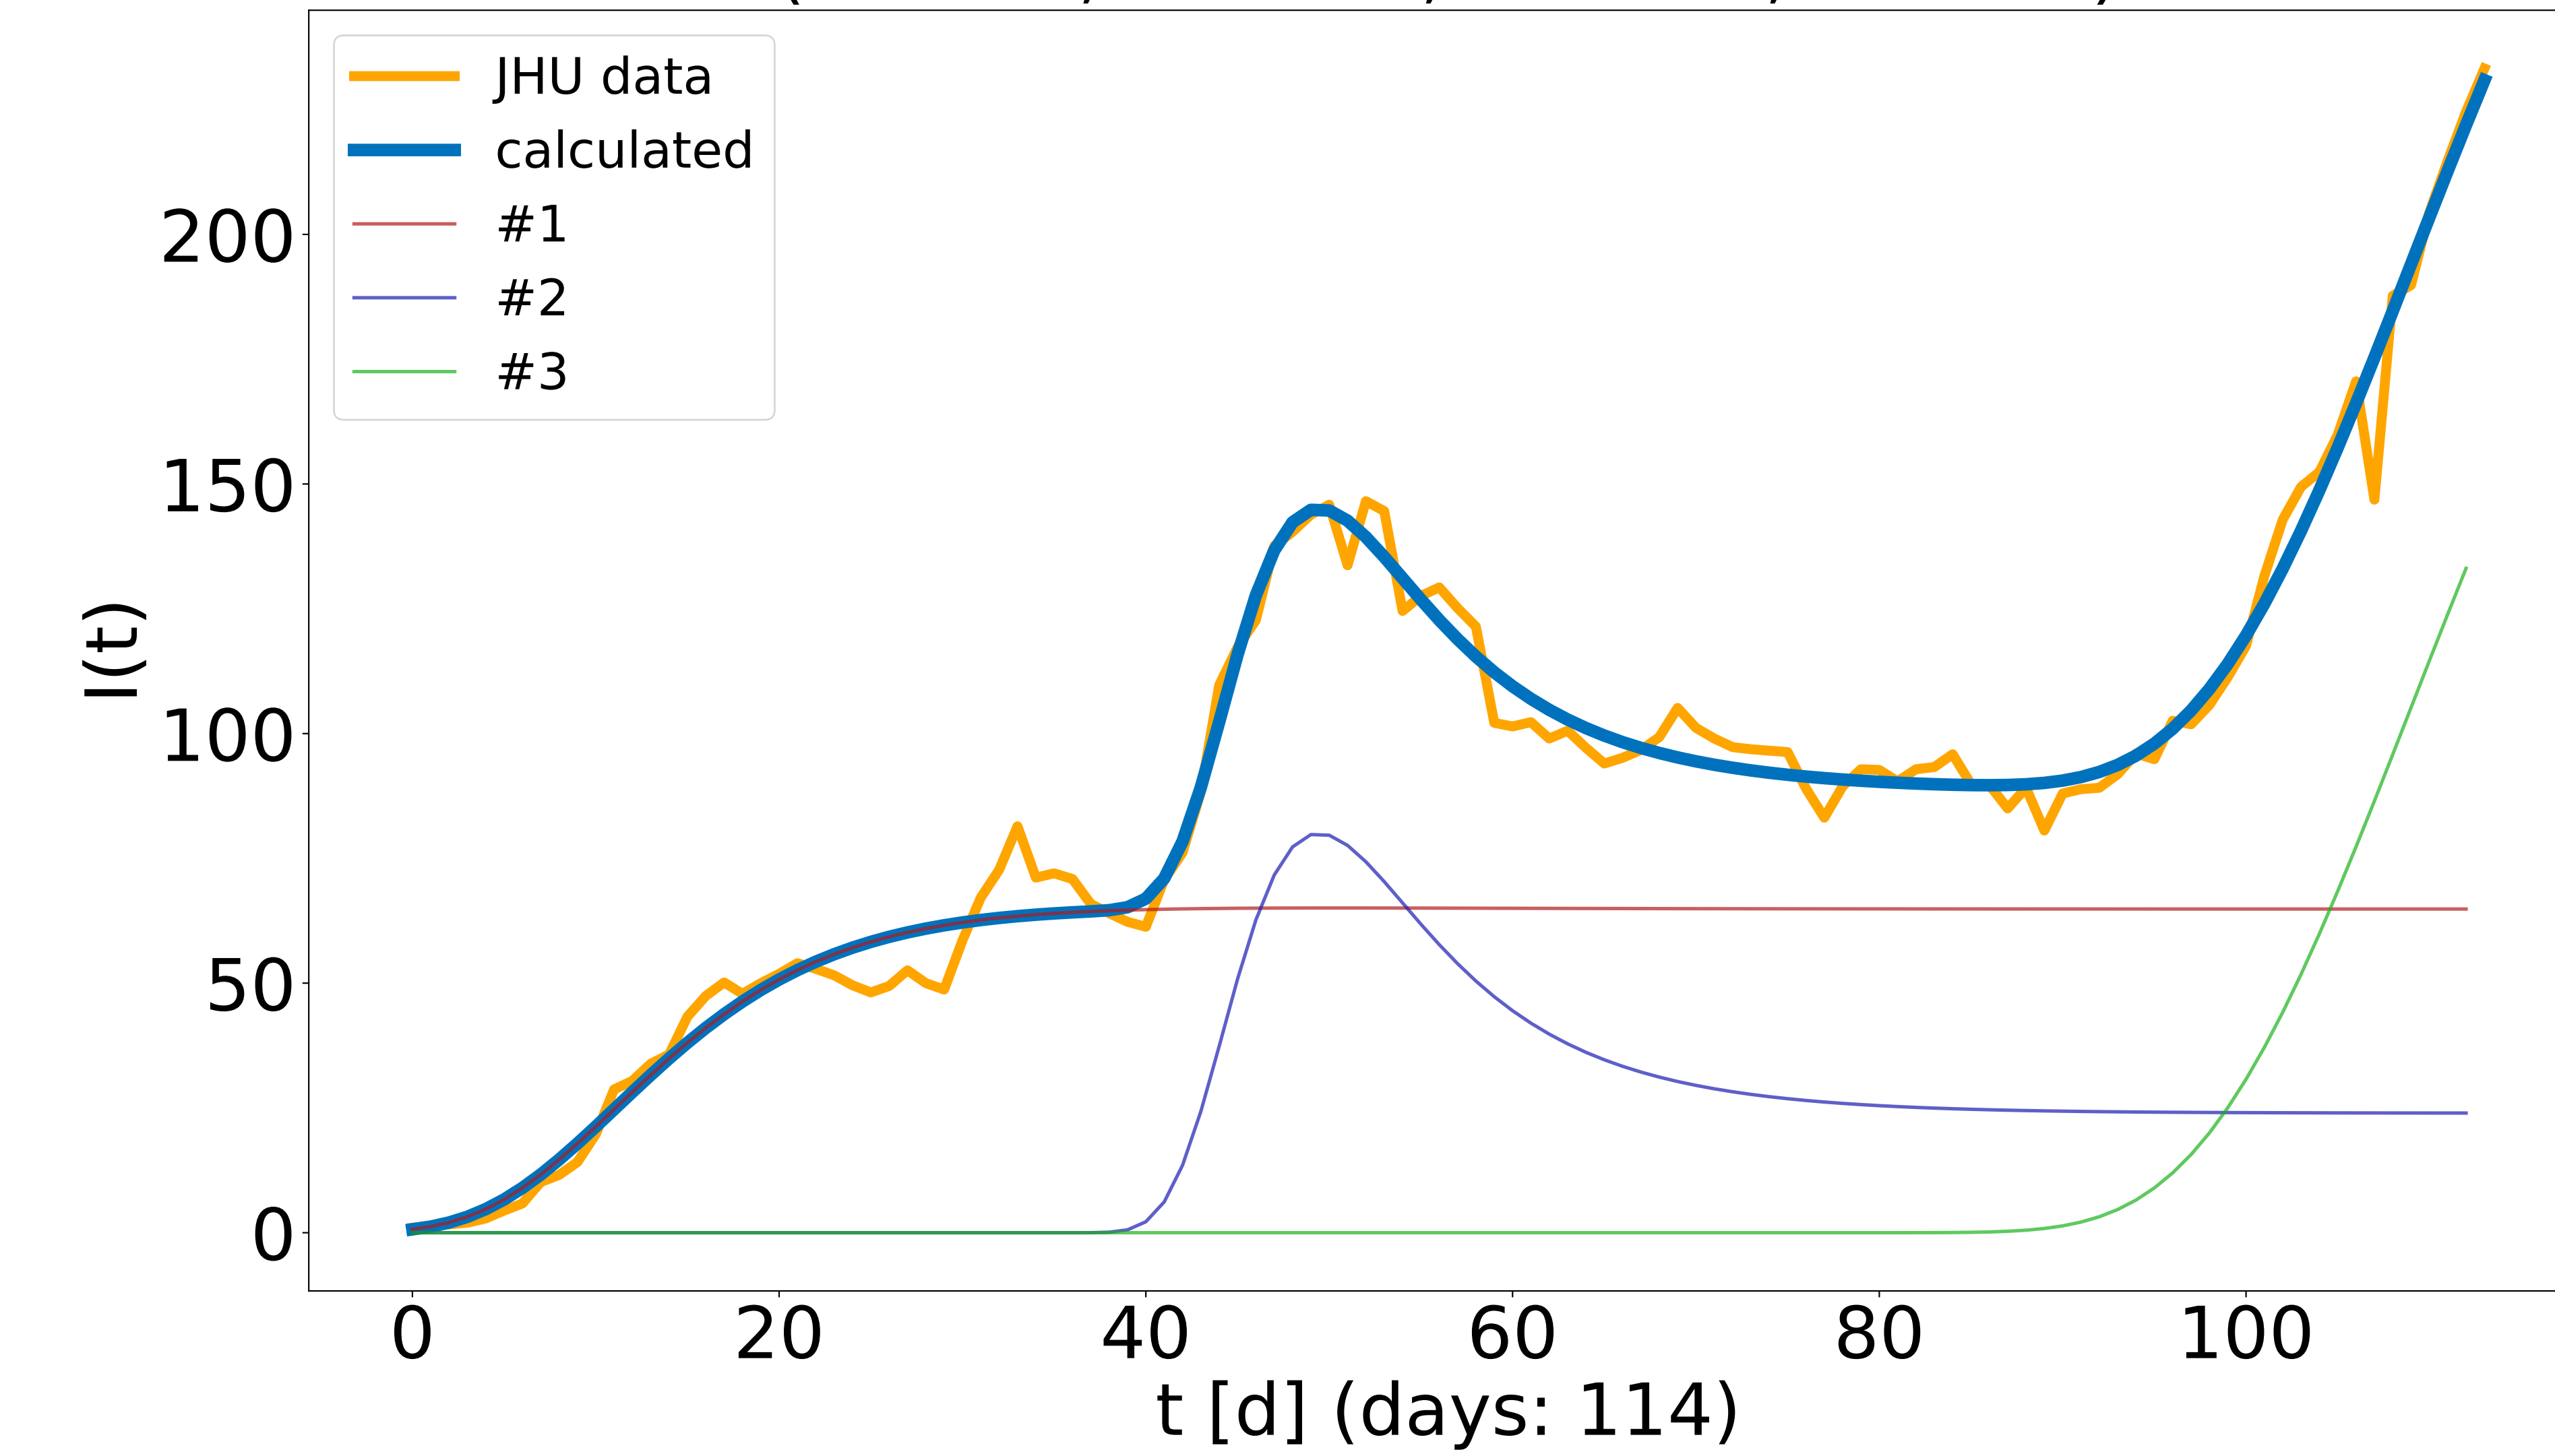

Hamilton, Ohio, US, Hamilton ( $R^2 = 0.625$ )  
(i: 0.1, a: 1.756, b: 0.105, t: 6.7)  
(i: 19.4, a: 0.167, b: 0.059, t: 28.5)  
(i: 171.6, a: 0.001, b: 0.088, t: 128.1)

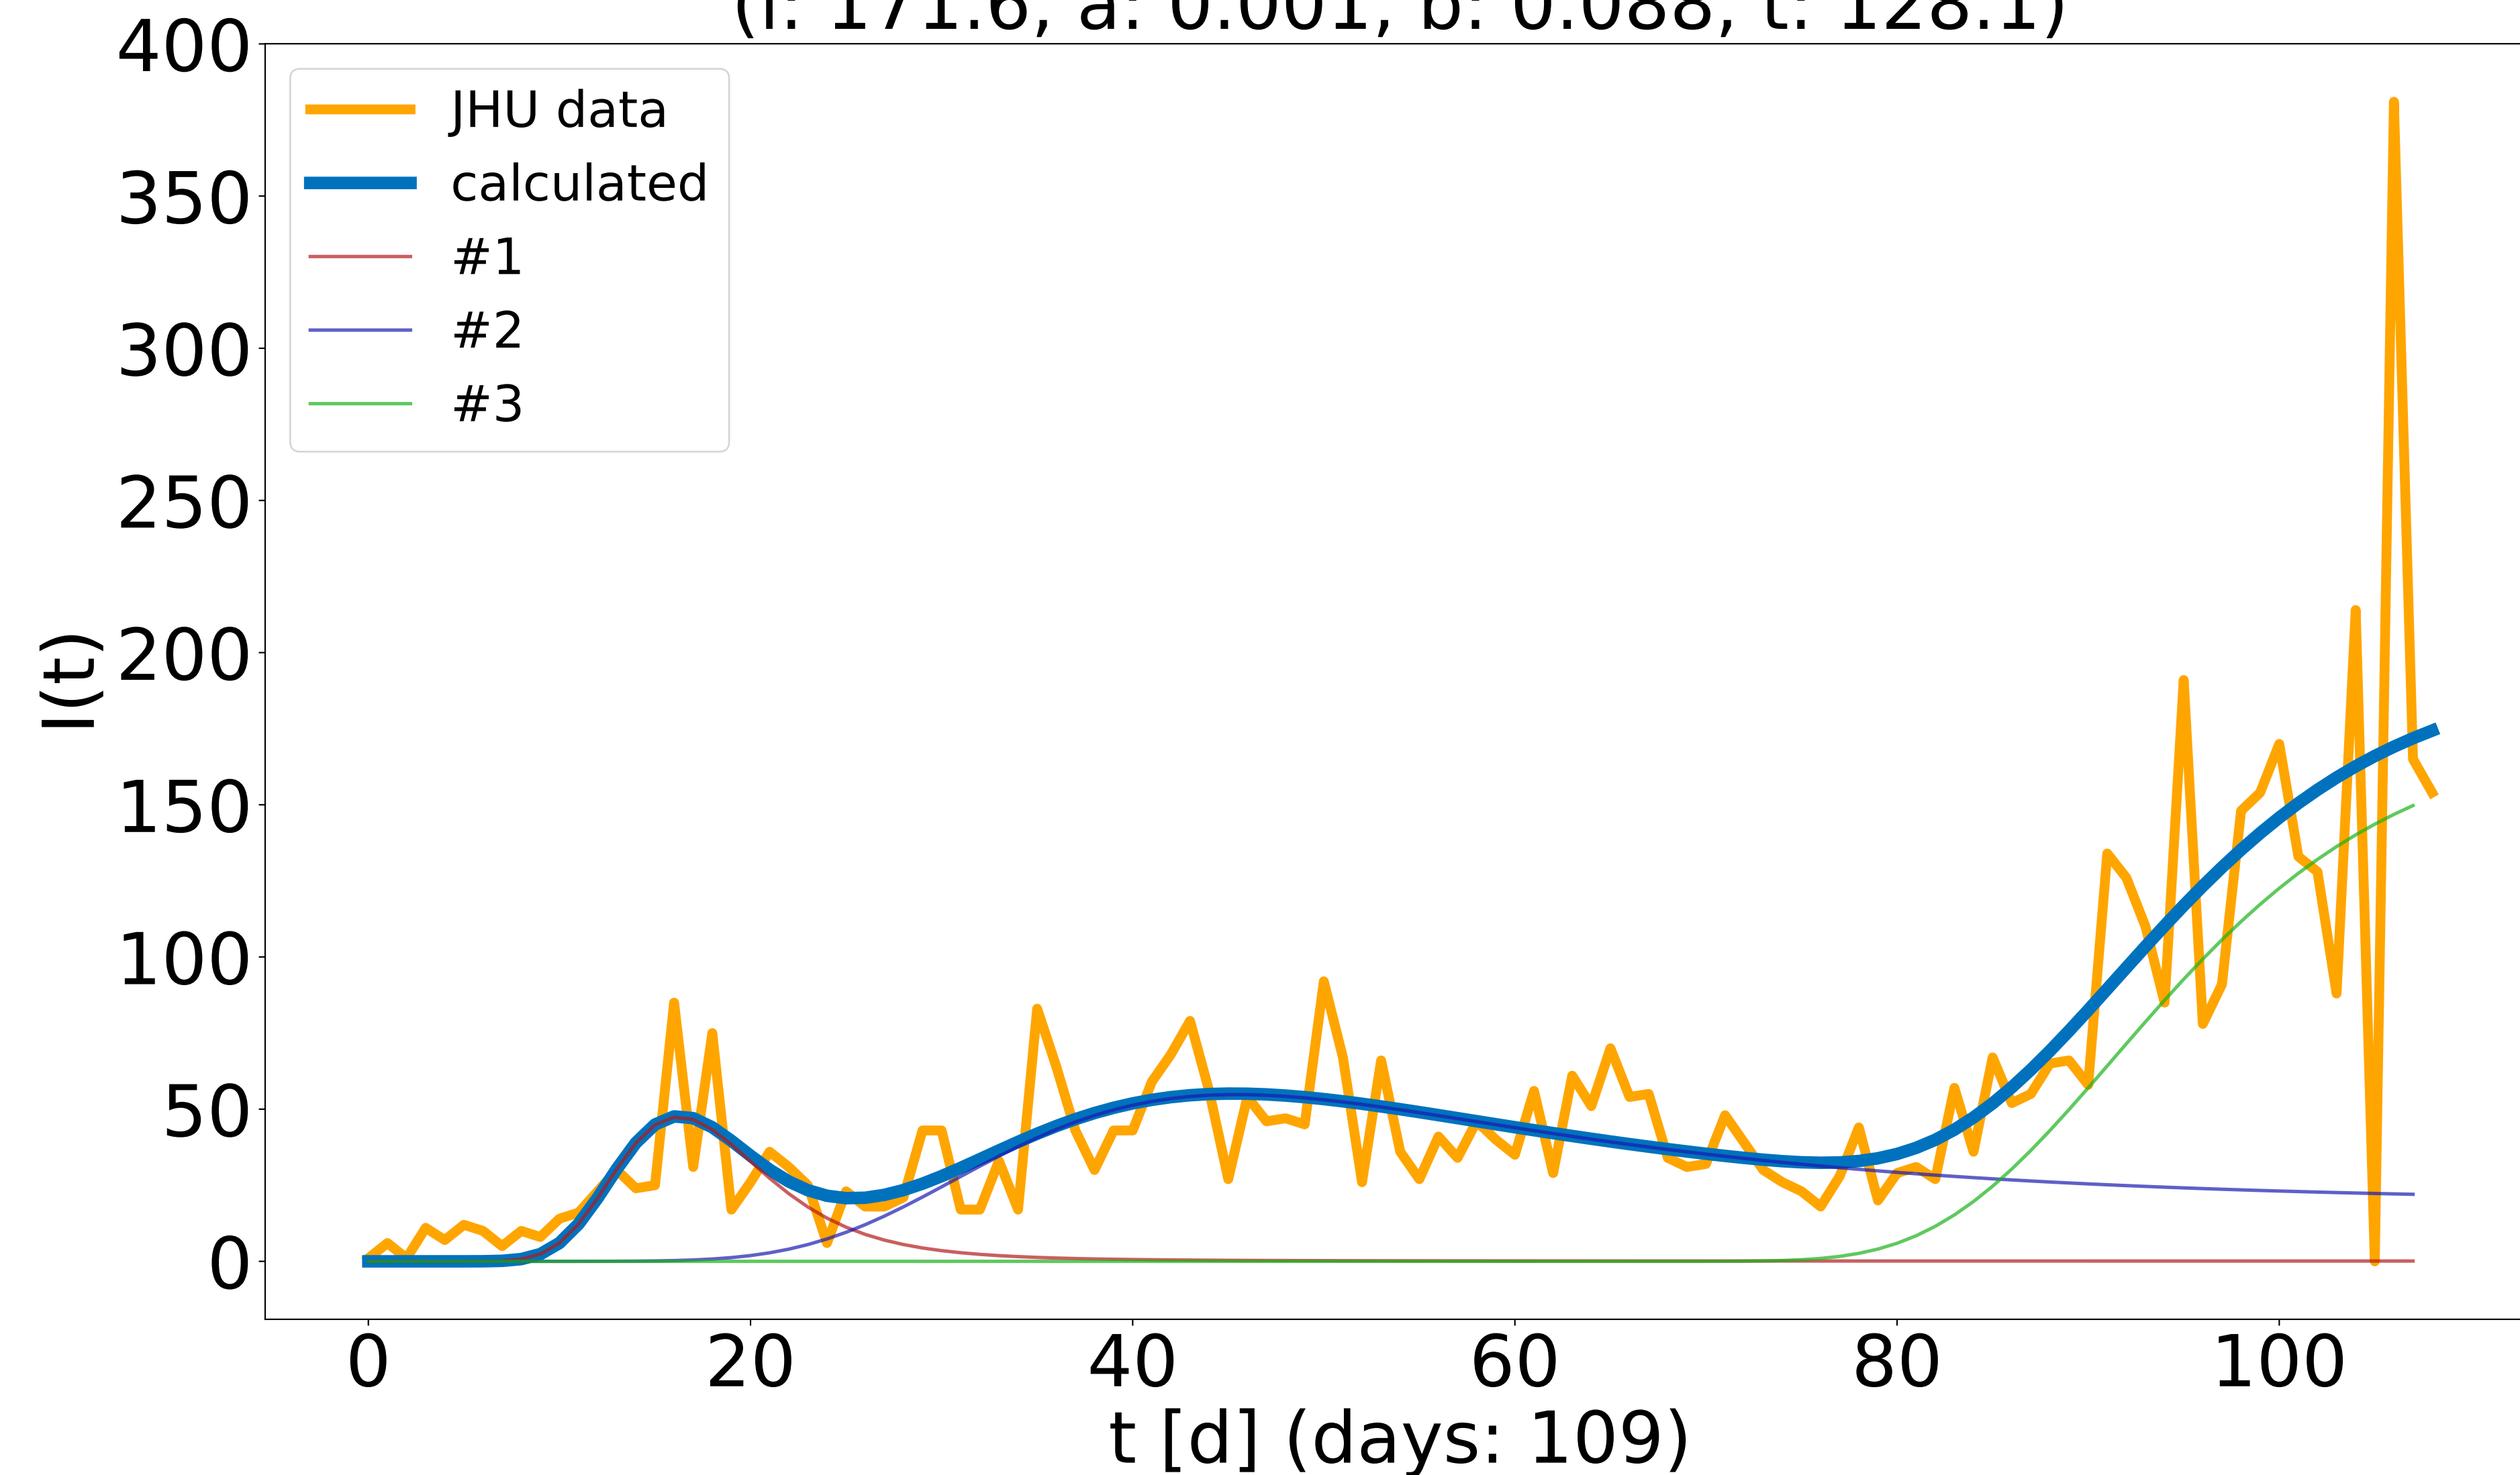

Hamilton, Ohio, US, Hamilton ( $R^2 = 0.981$ )  
(i: 0.1, a: 1.216, b: 0.075, t: 3.0)  
(i: 23.5, a: 0.153, b: 0.068, t: 30.8)  
(i: 156.1, a: 0.001, b: 0.097, t: 124.8)

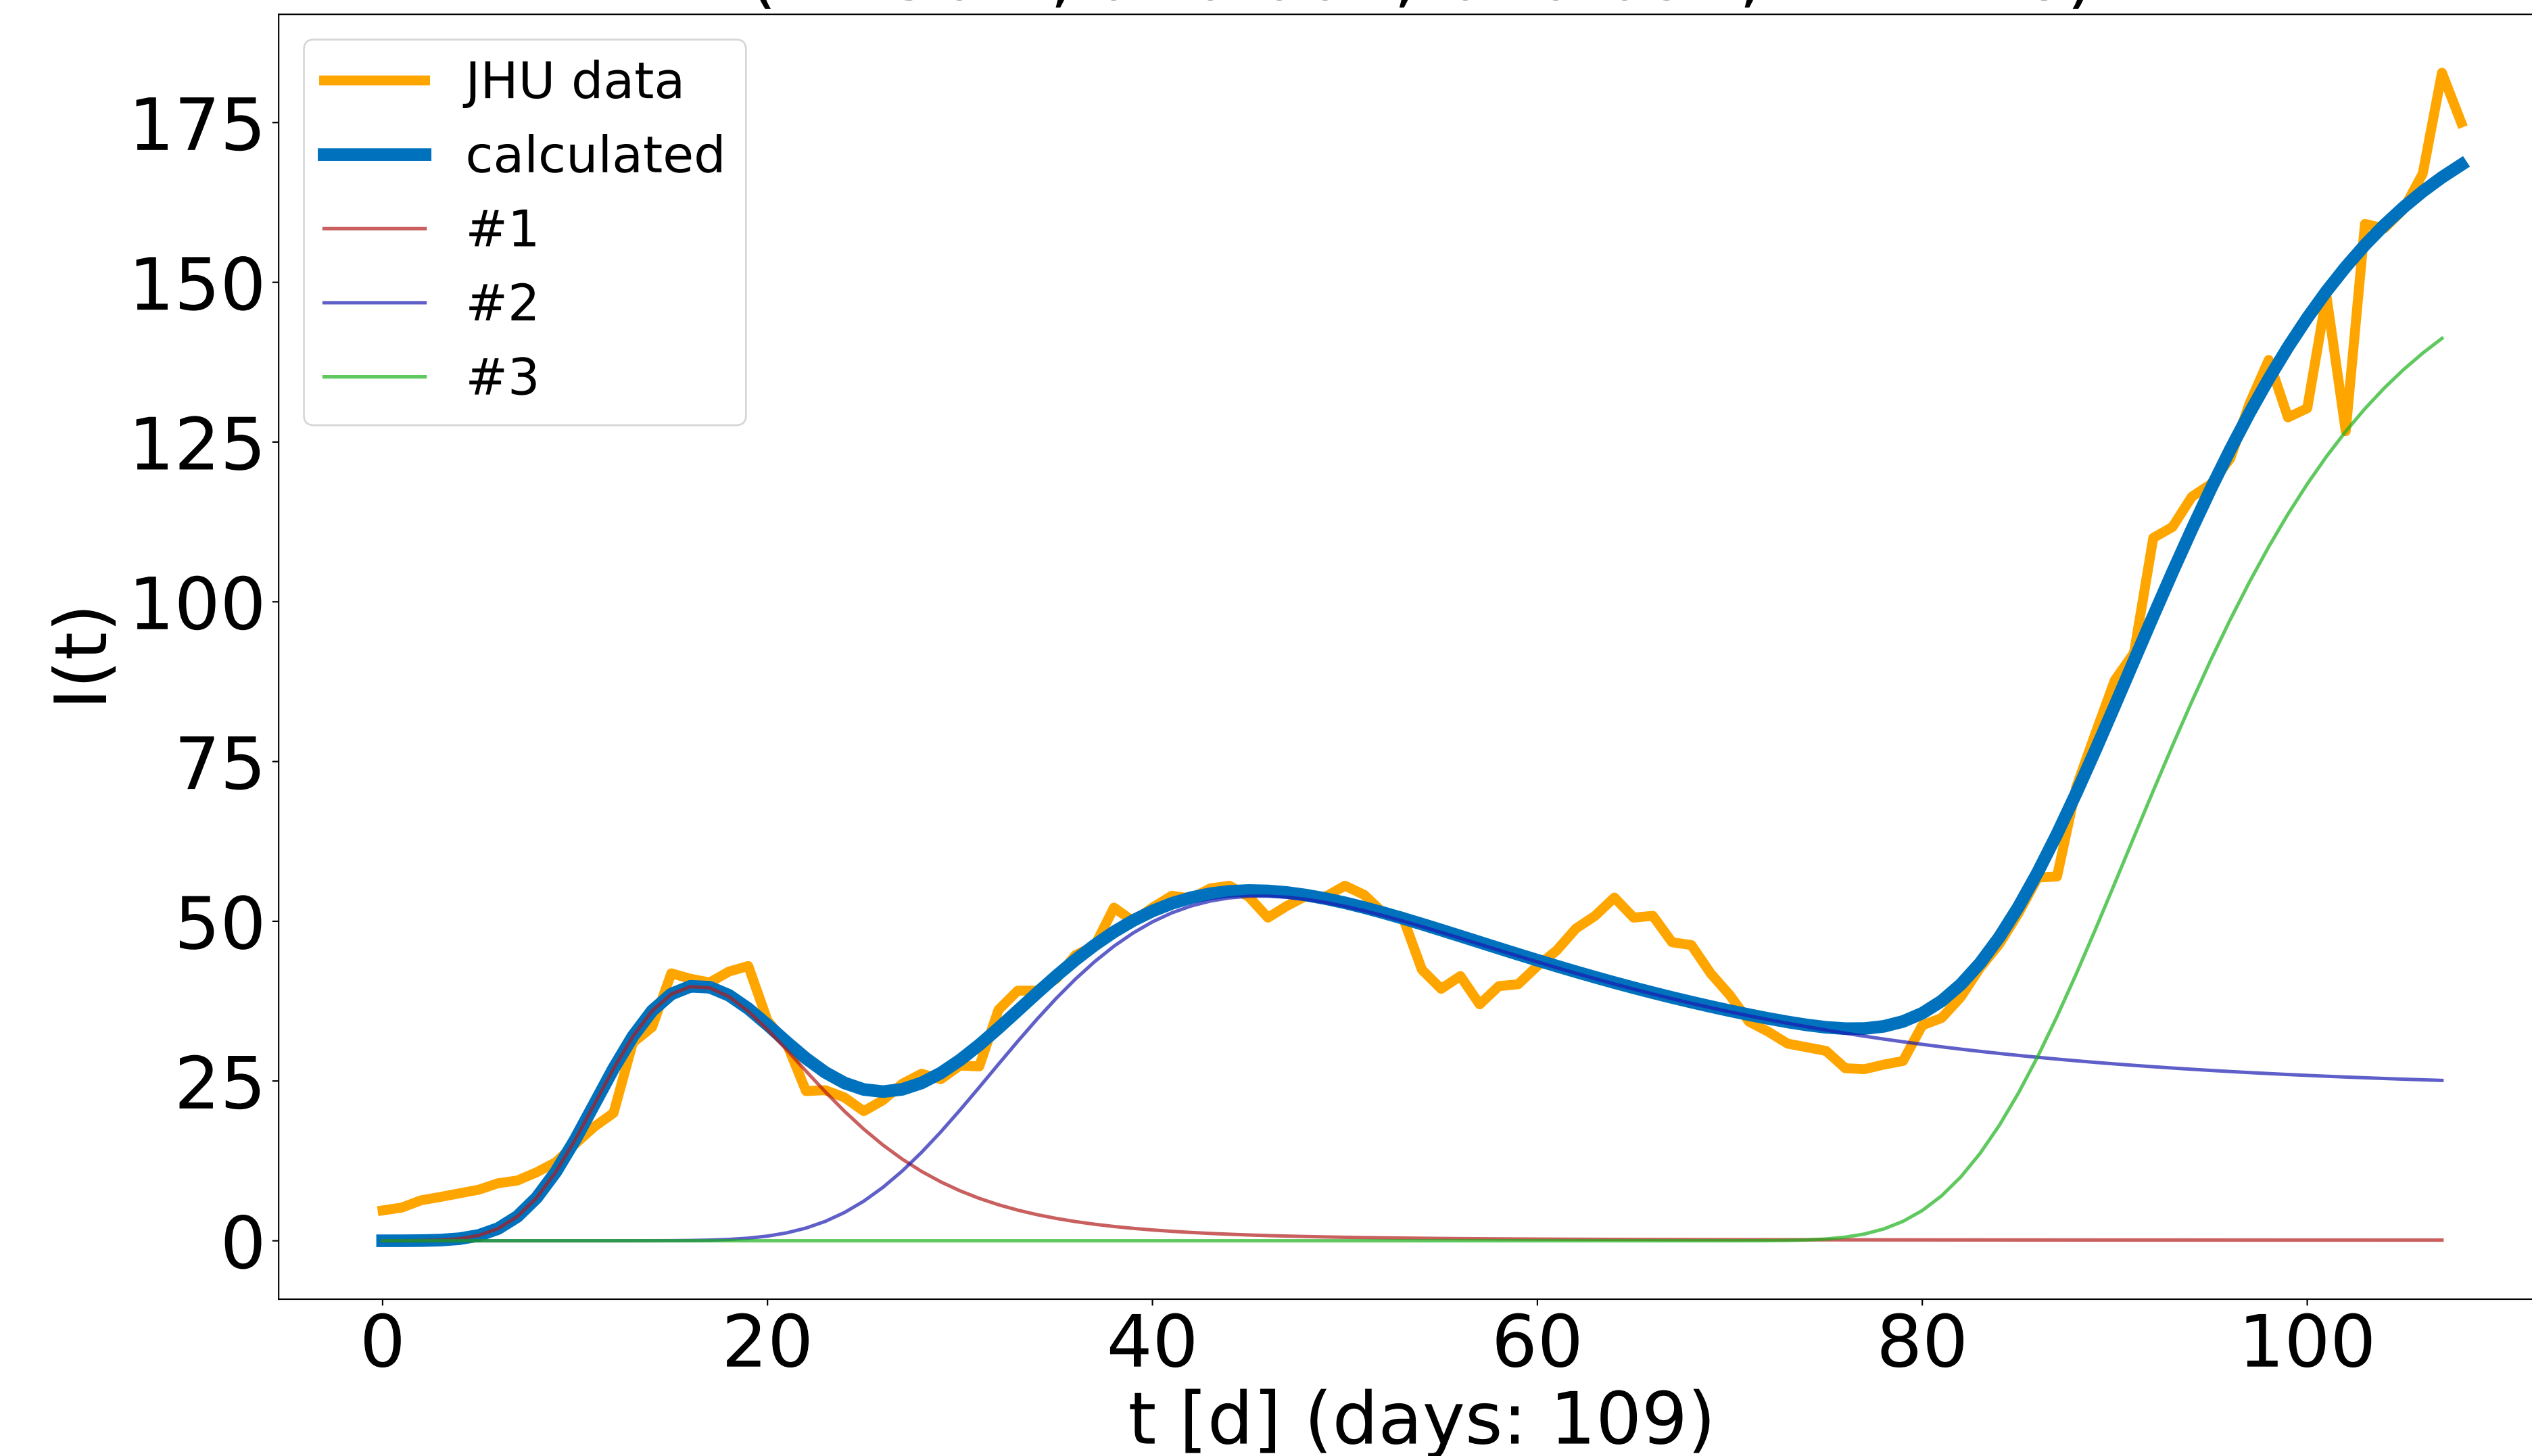

Montgomery, Ohio, US, Montgomery ( $R^2 = 0.624$ )

(i: 3.9, a: 1.036, b: 0.244, t: 14.8)

(i: 8.4, a: 0.001, b: 1.361, t: 47.4)

(i: 2.8, a: 0.275, b: 0.038, t: 77.3)

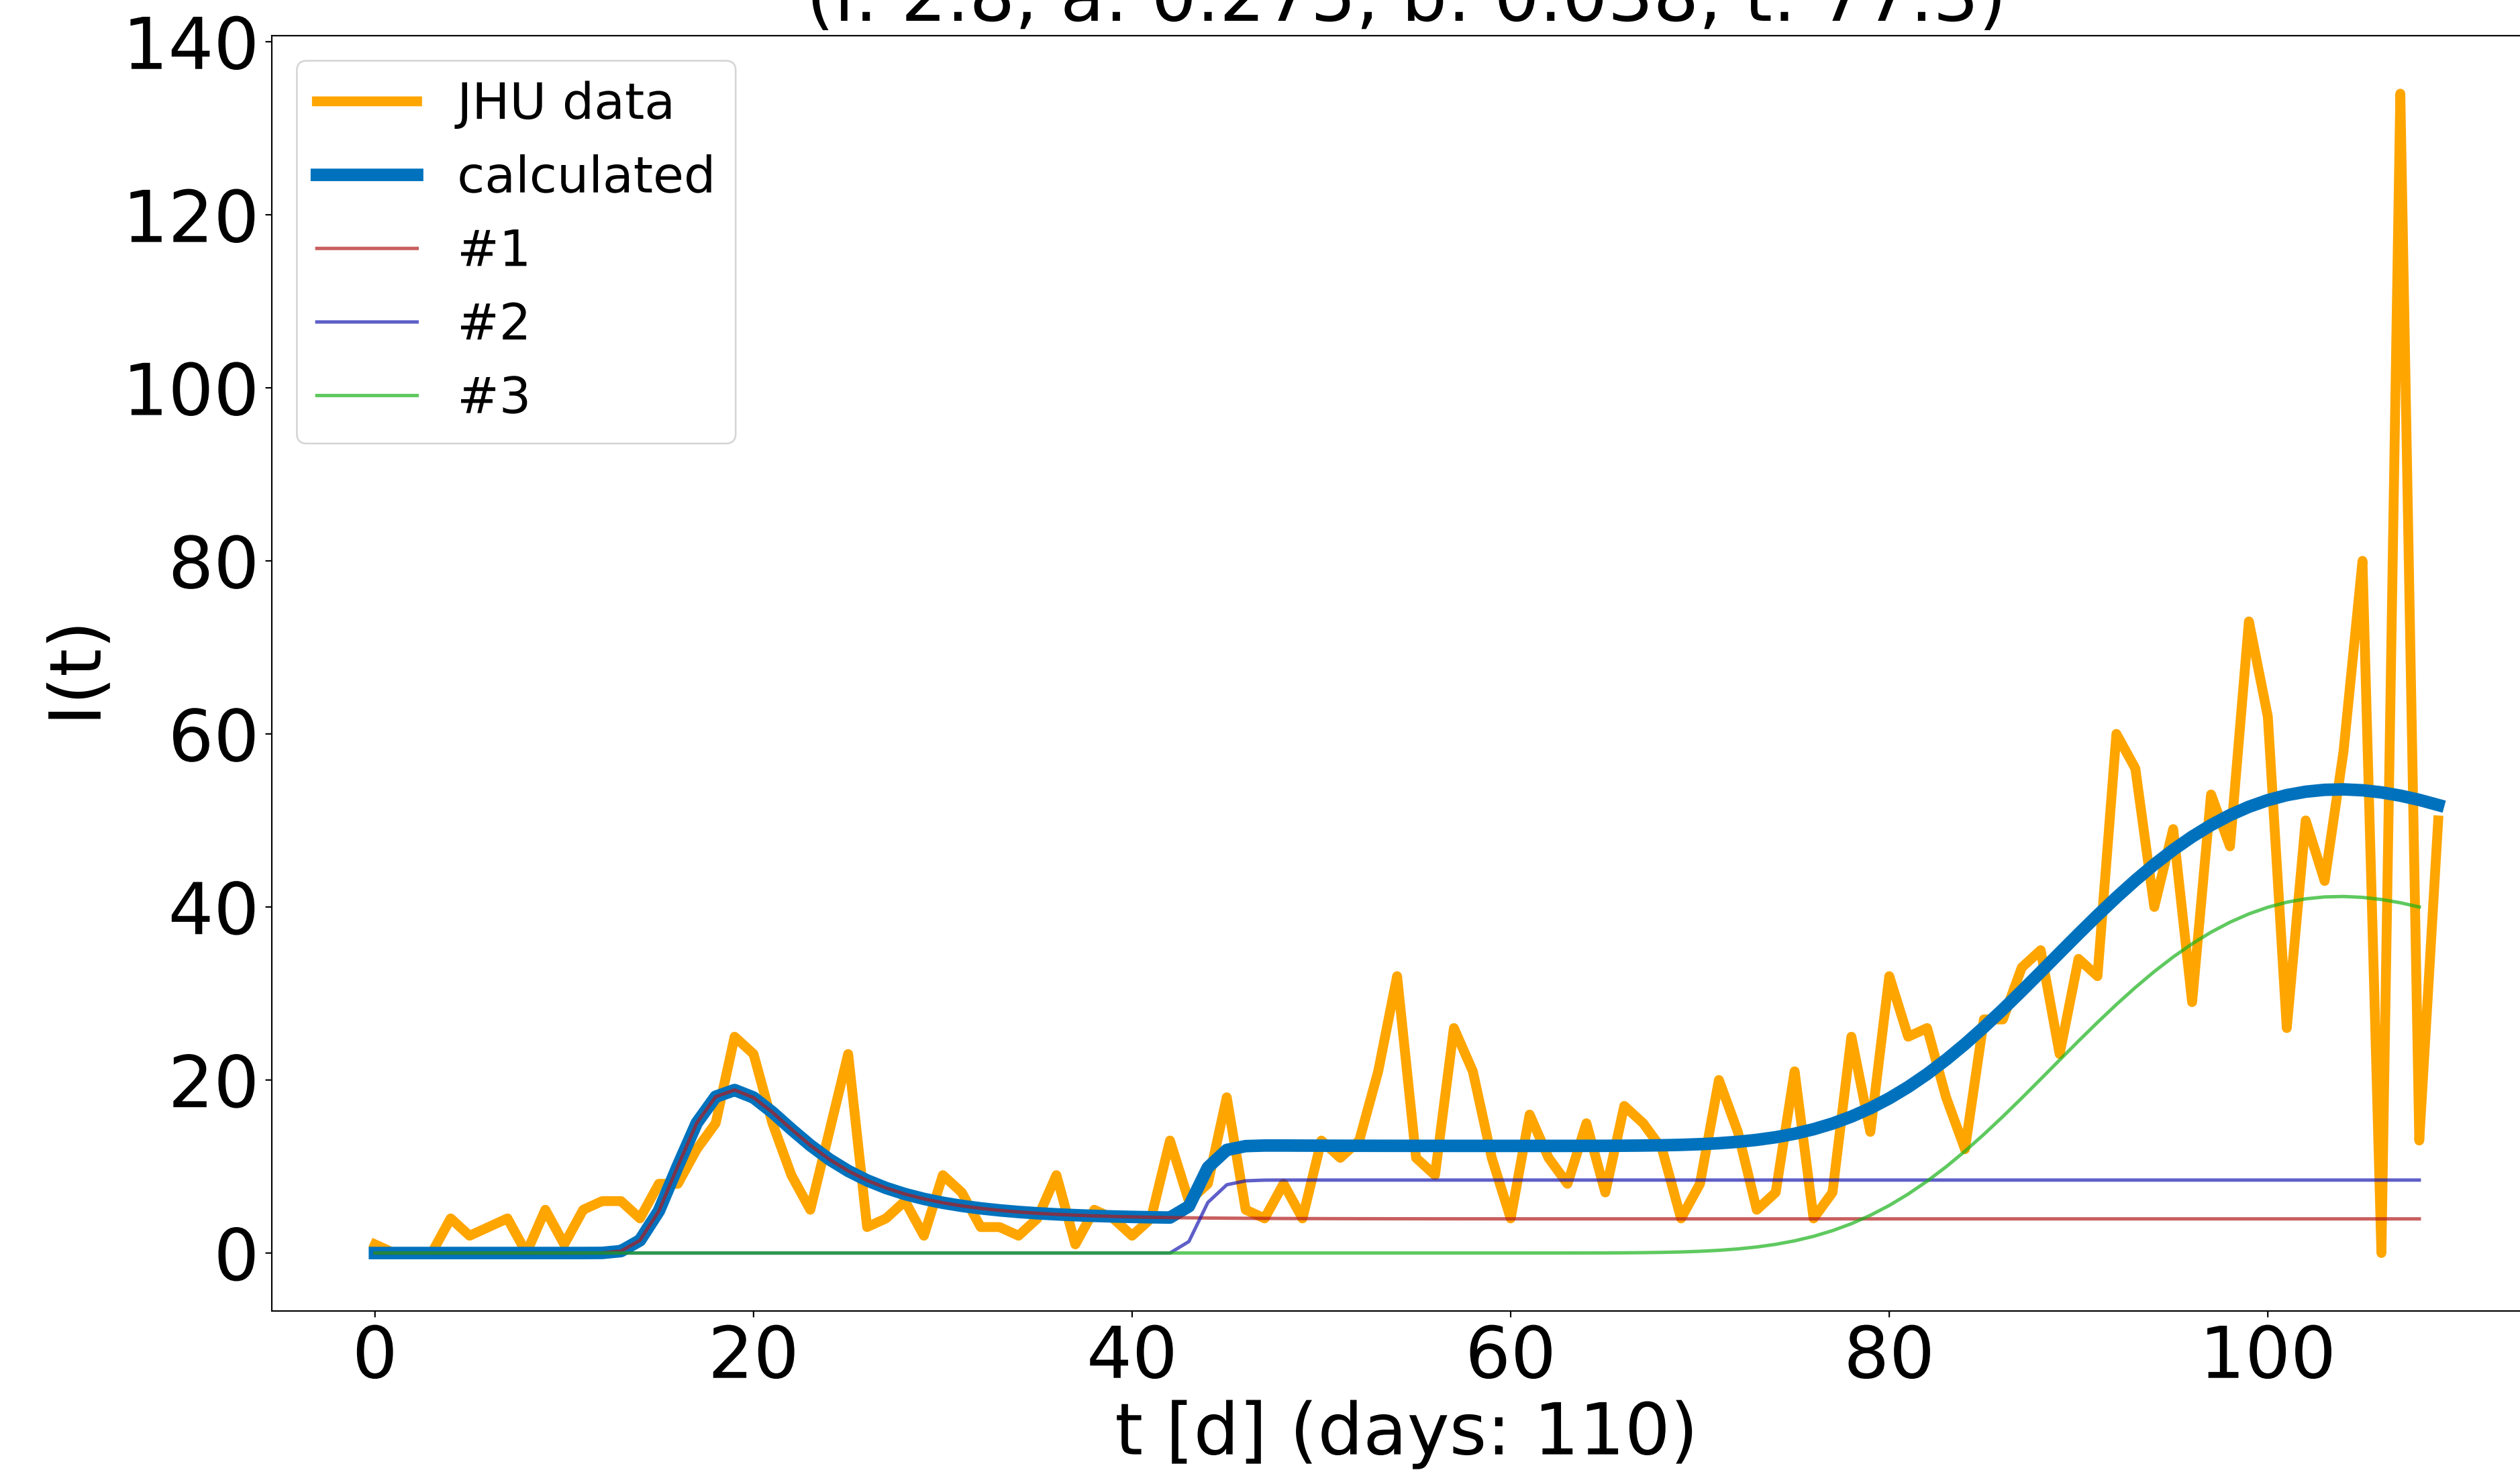

Montgomery, Ohio, US, Montgomery ( $R^2 = 0.987$ )

(i: 0.1, a: 0.994, b: 0.073, t: 5.9)

(i: 0.1, a: 0.558, b: 0.041, t: 31.4)

(i: 0.1, a: 0.363, b: 0.021, t: 58.3)

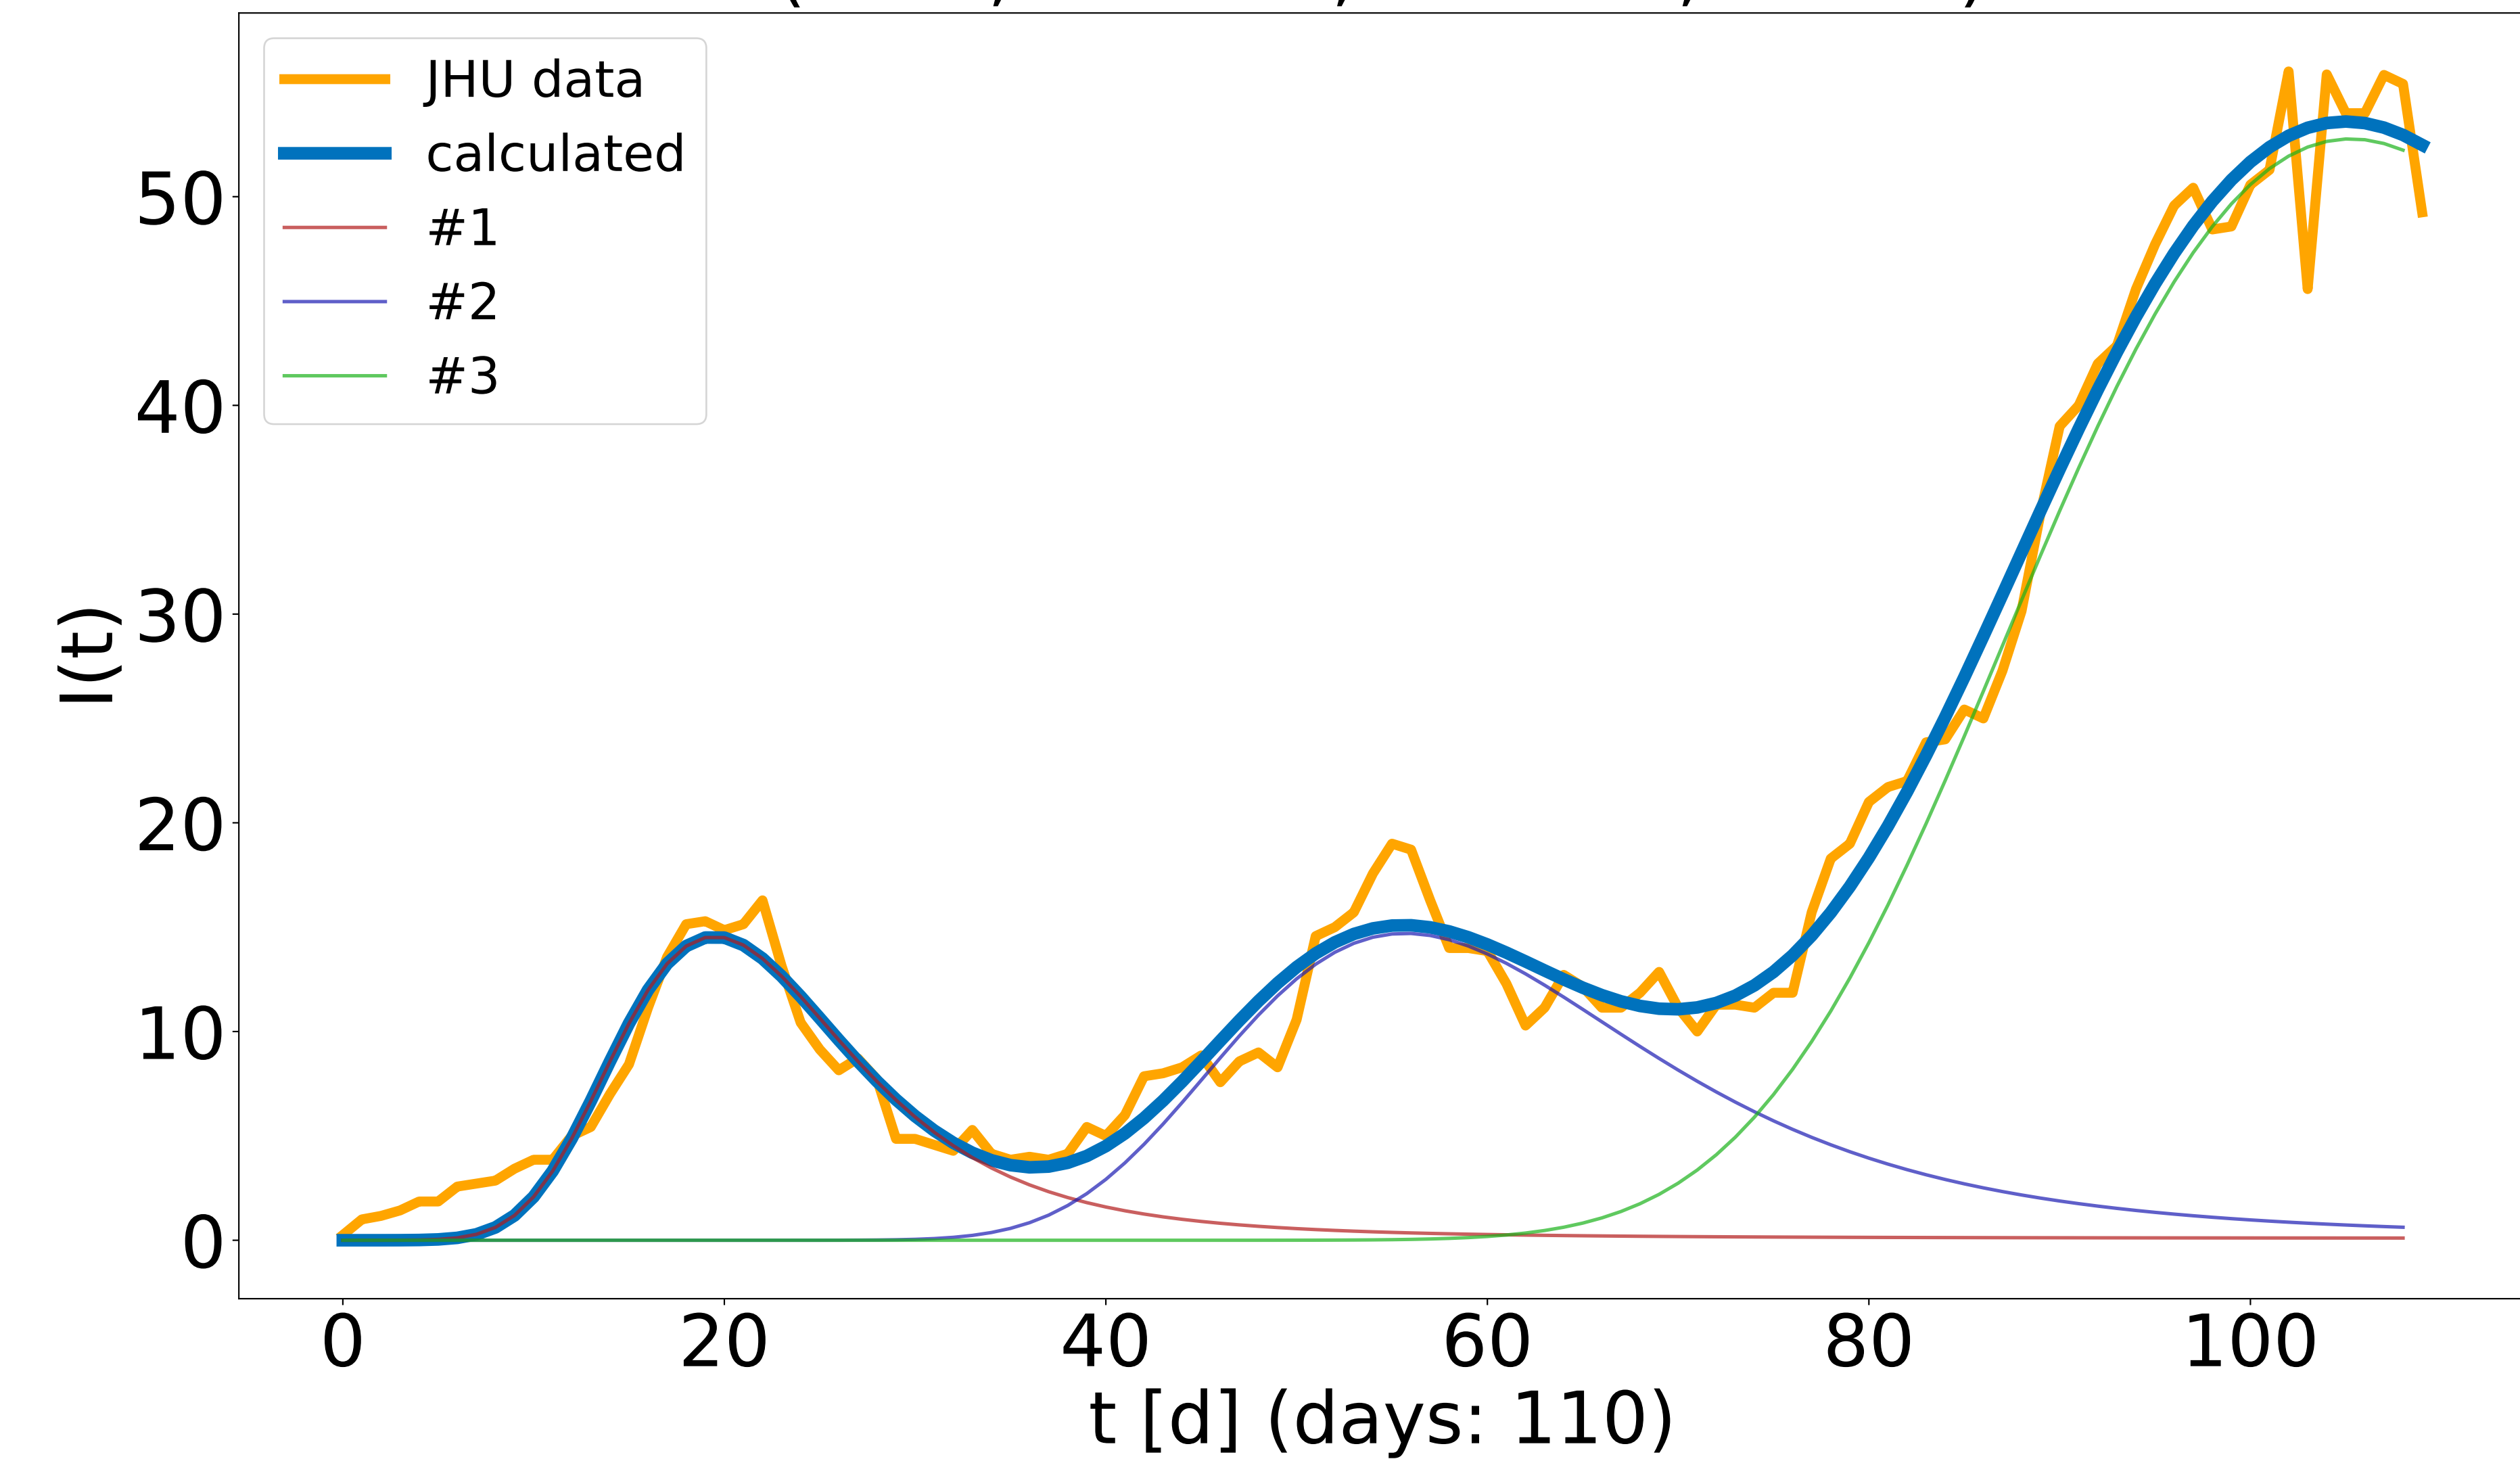



Multnomah, Oregon, US, Multnomah ( $R^2 = 0.577$ )

(i: 2.3, a: 0.214, b: 0.041, t: 9.0)

(i: 5.5, a: 2.0, b: 1.254, t: 15.0)

(i: 45.6, a: 0.001, b: 0.079, t: 129.7)

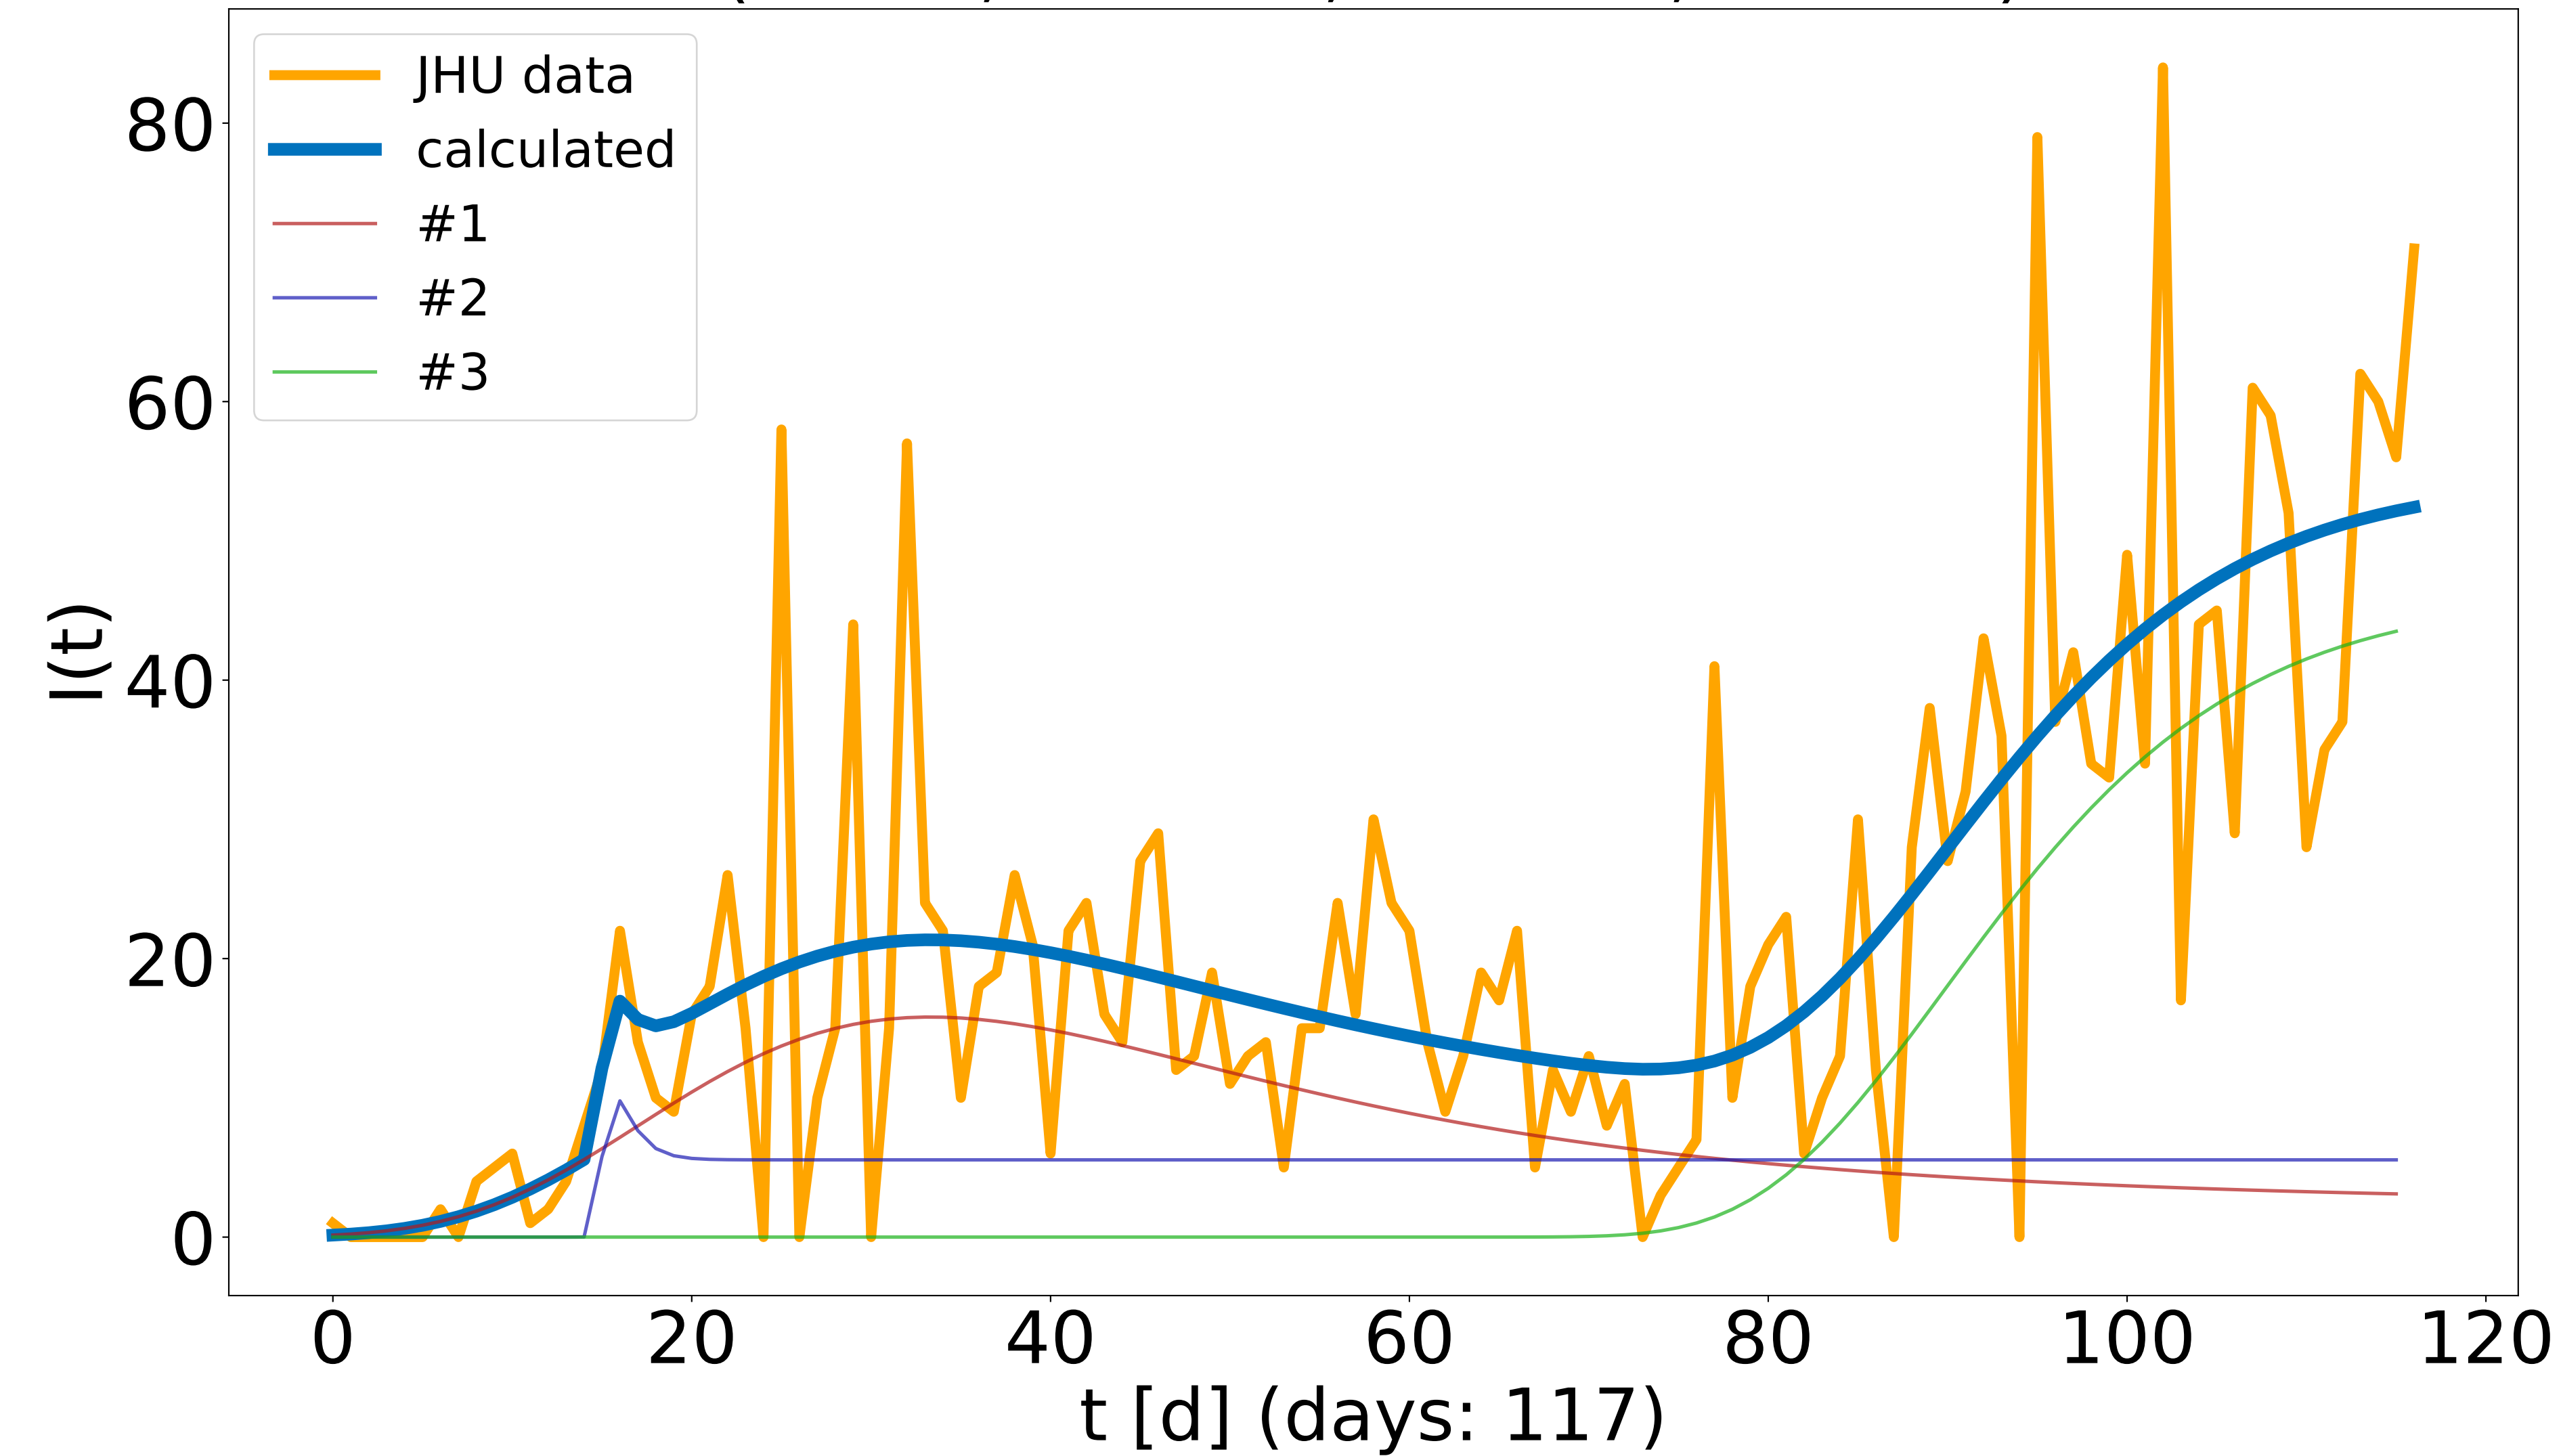

Multnomah, Oregon, US, Multnomah ( $R^2 = 0.972$ )

(i: 10.3, a: 0.123, b: 0.061, t: 15.3)

(i: 0.1, a: 0.574, b: 0.037, t: 73.9)

(i: 4.7, a: 0.202, b: 0.001, t: 106.0)

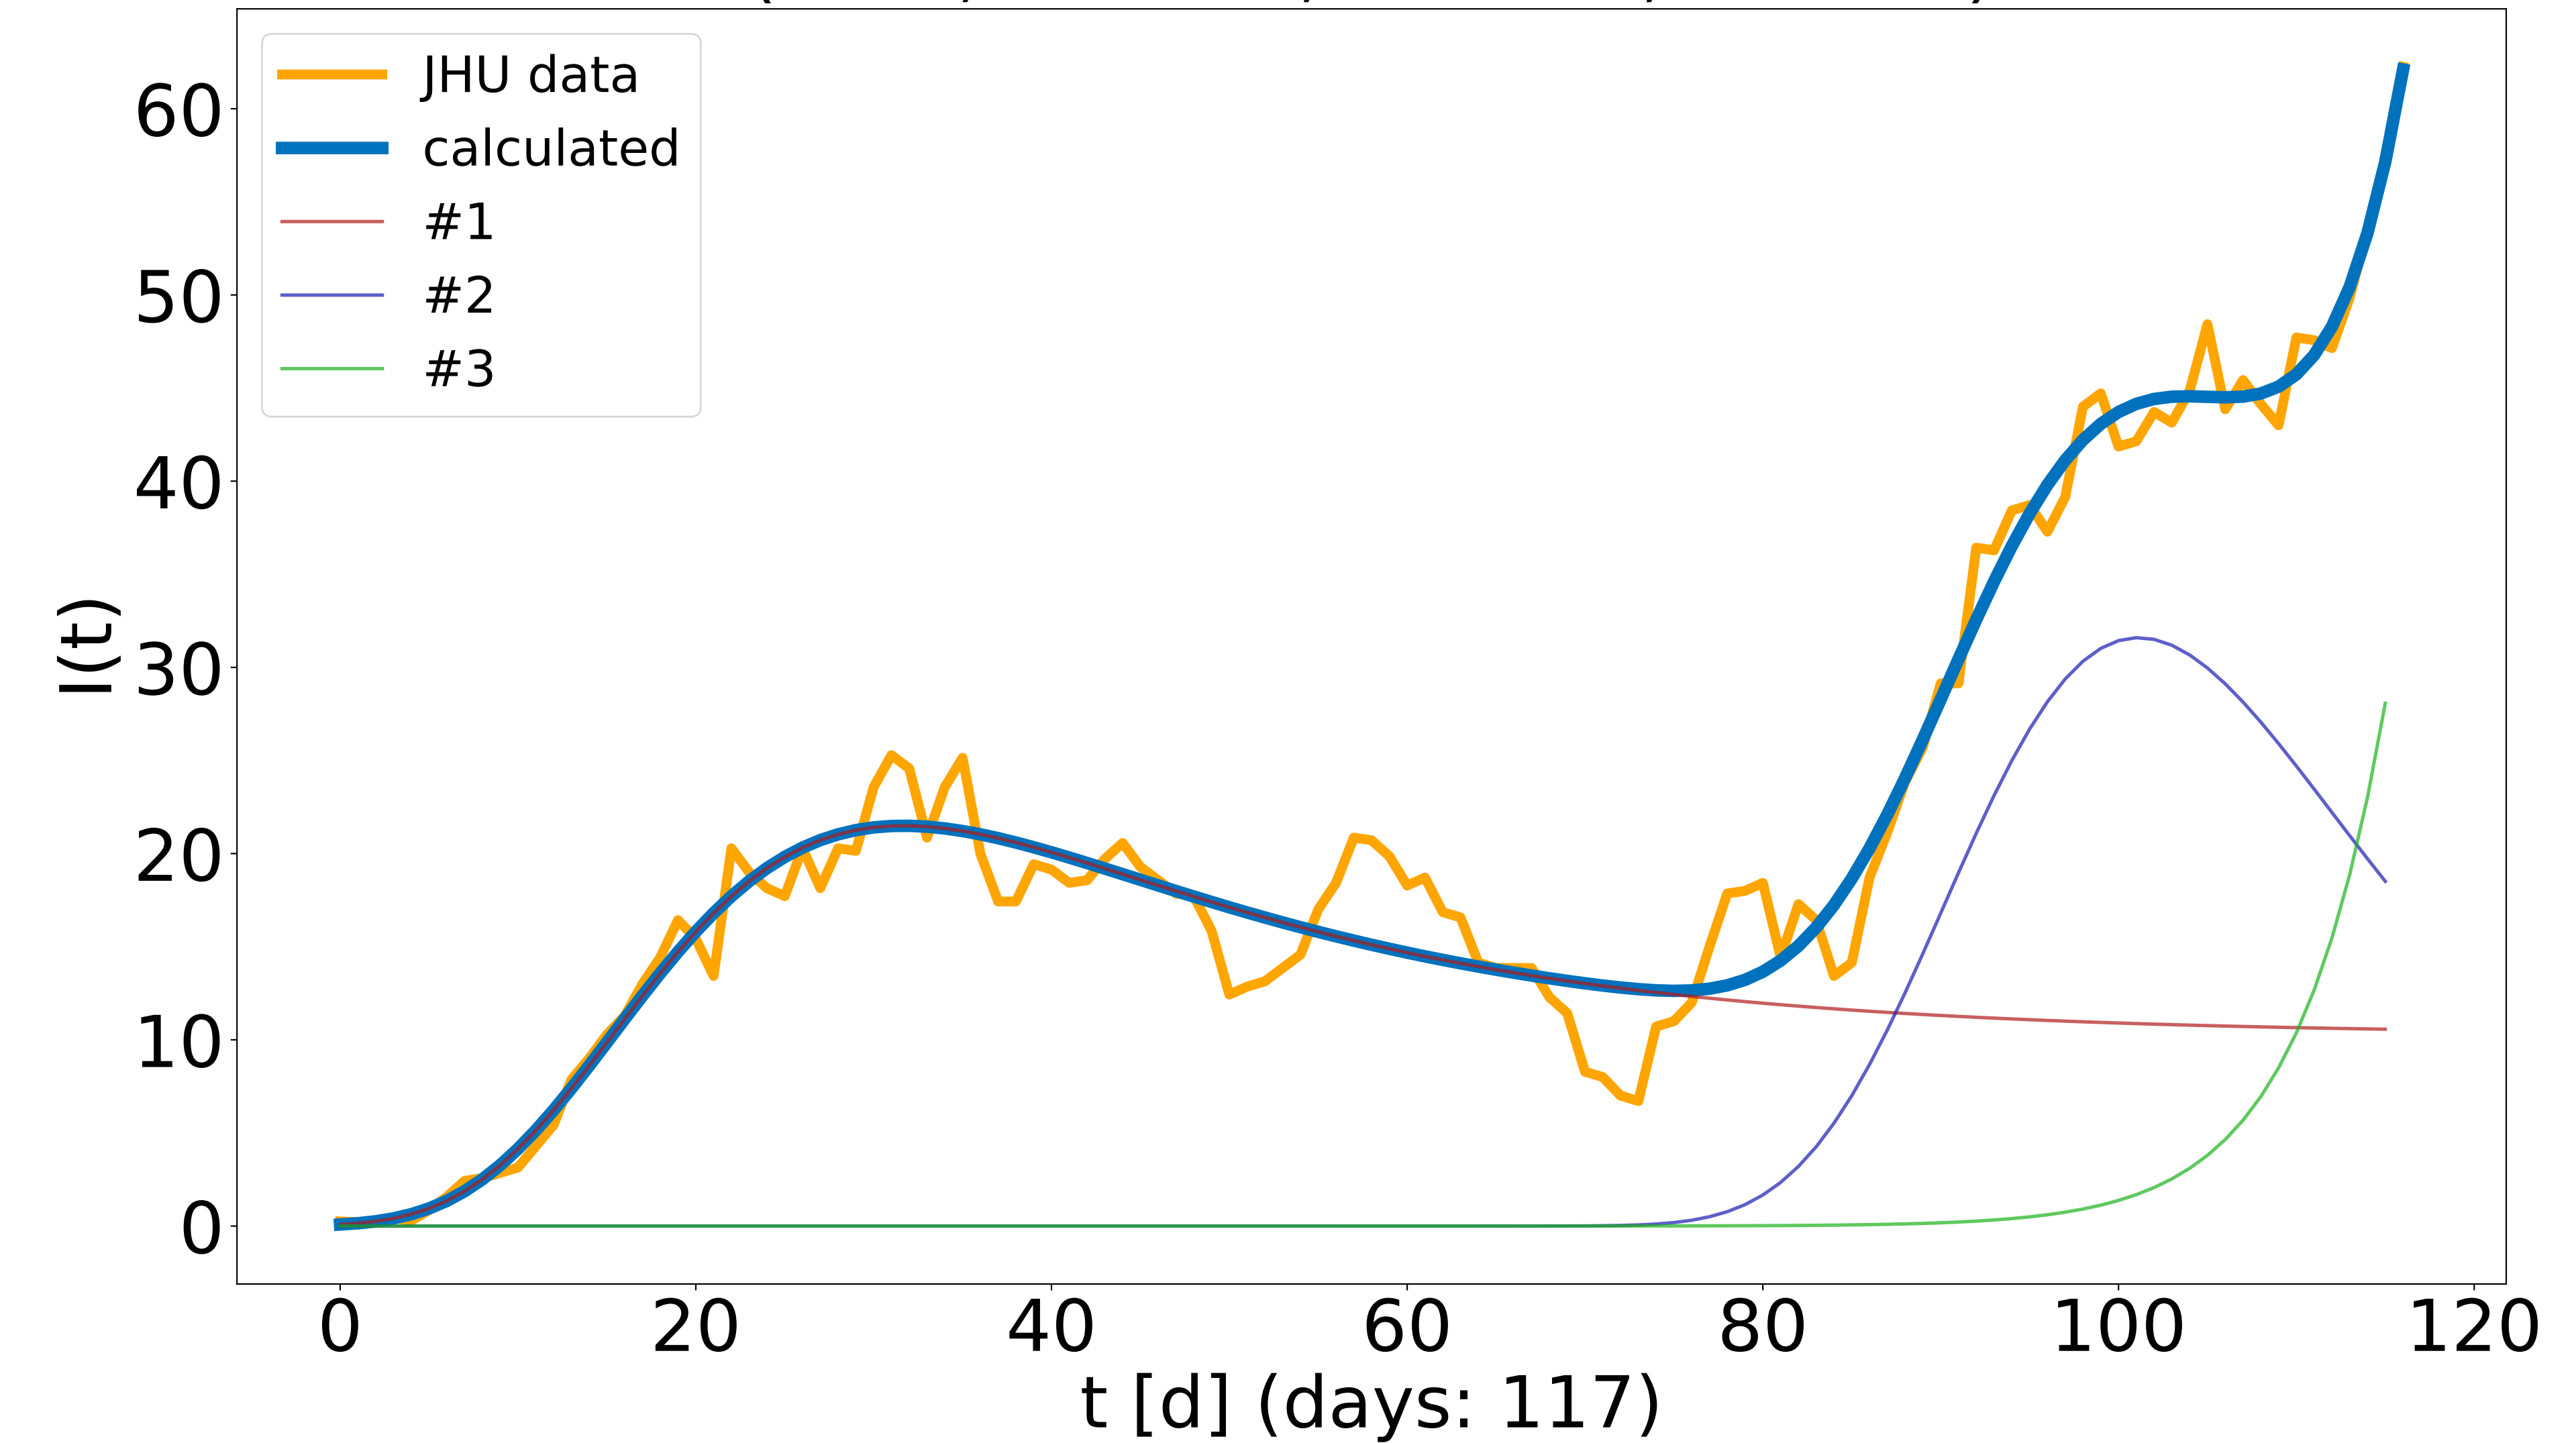

Berks, Pennsylvania, US, Berks ( $R^2 = 0.666$ )

(i: 6.0, a: 0.534, b: 0.065, t: 11.5)

(i: 13.0, a: 2.0, b: 0.979, t: 35.3)

(i: 0.1, a: 0.182, b: 1.219, t: 105.6)

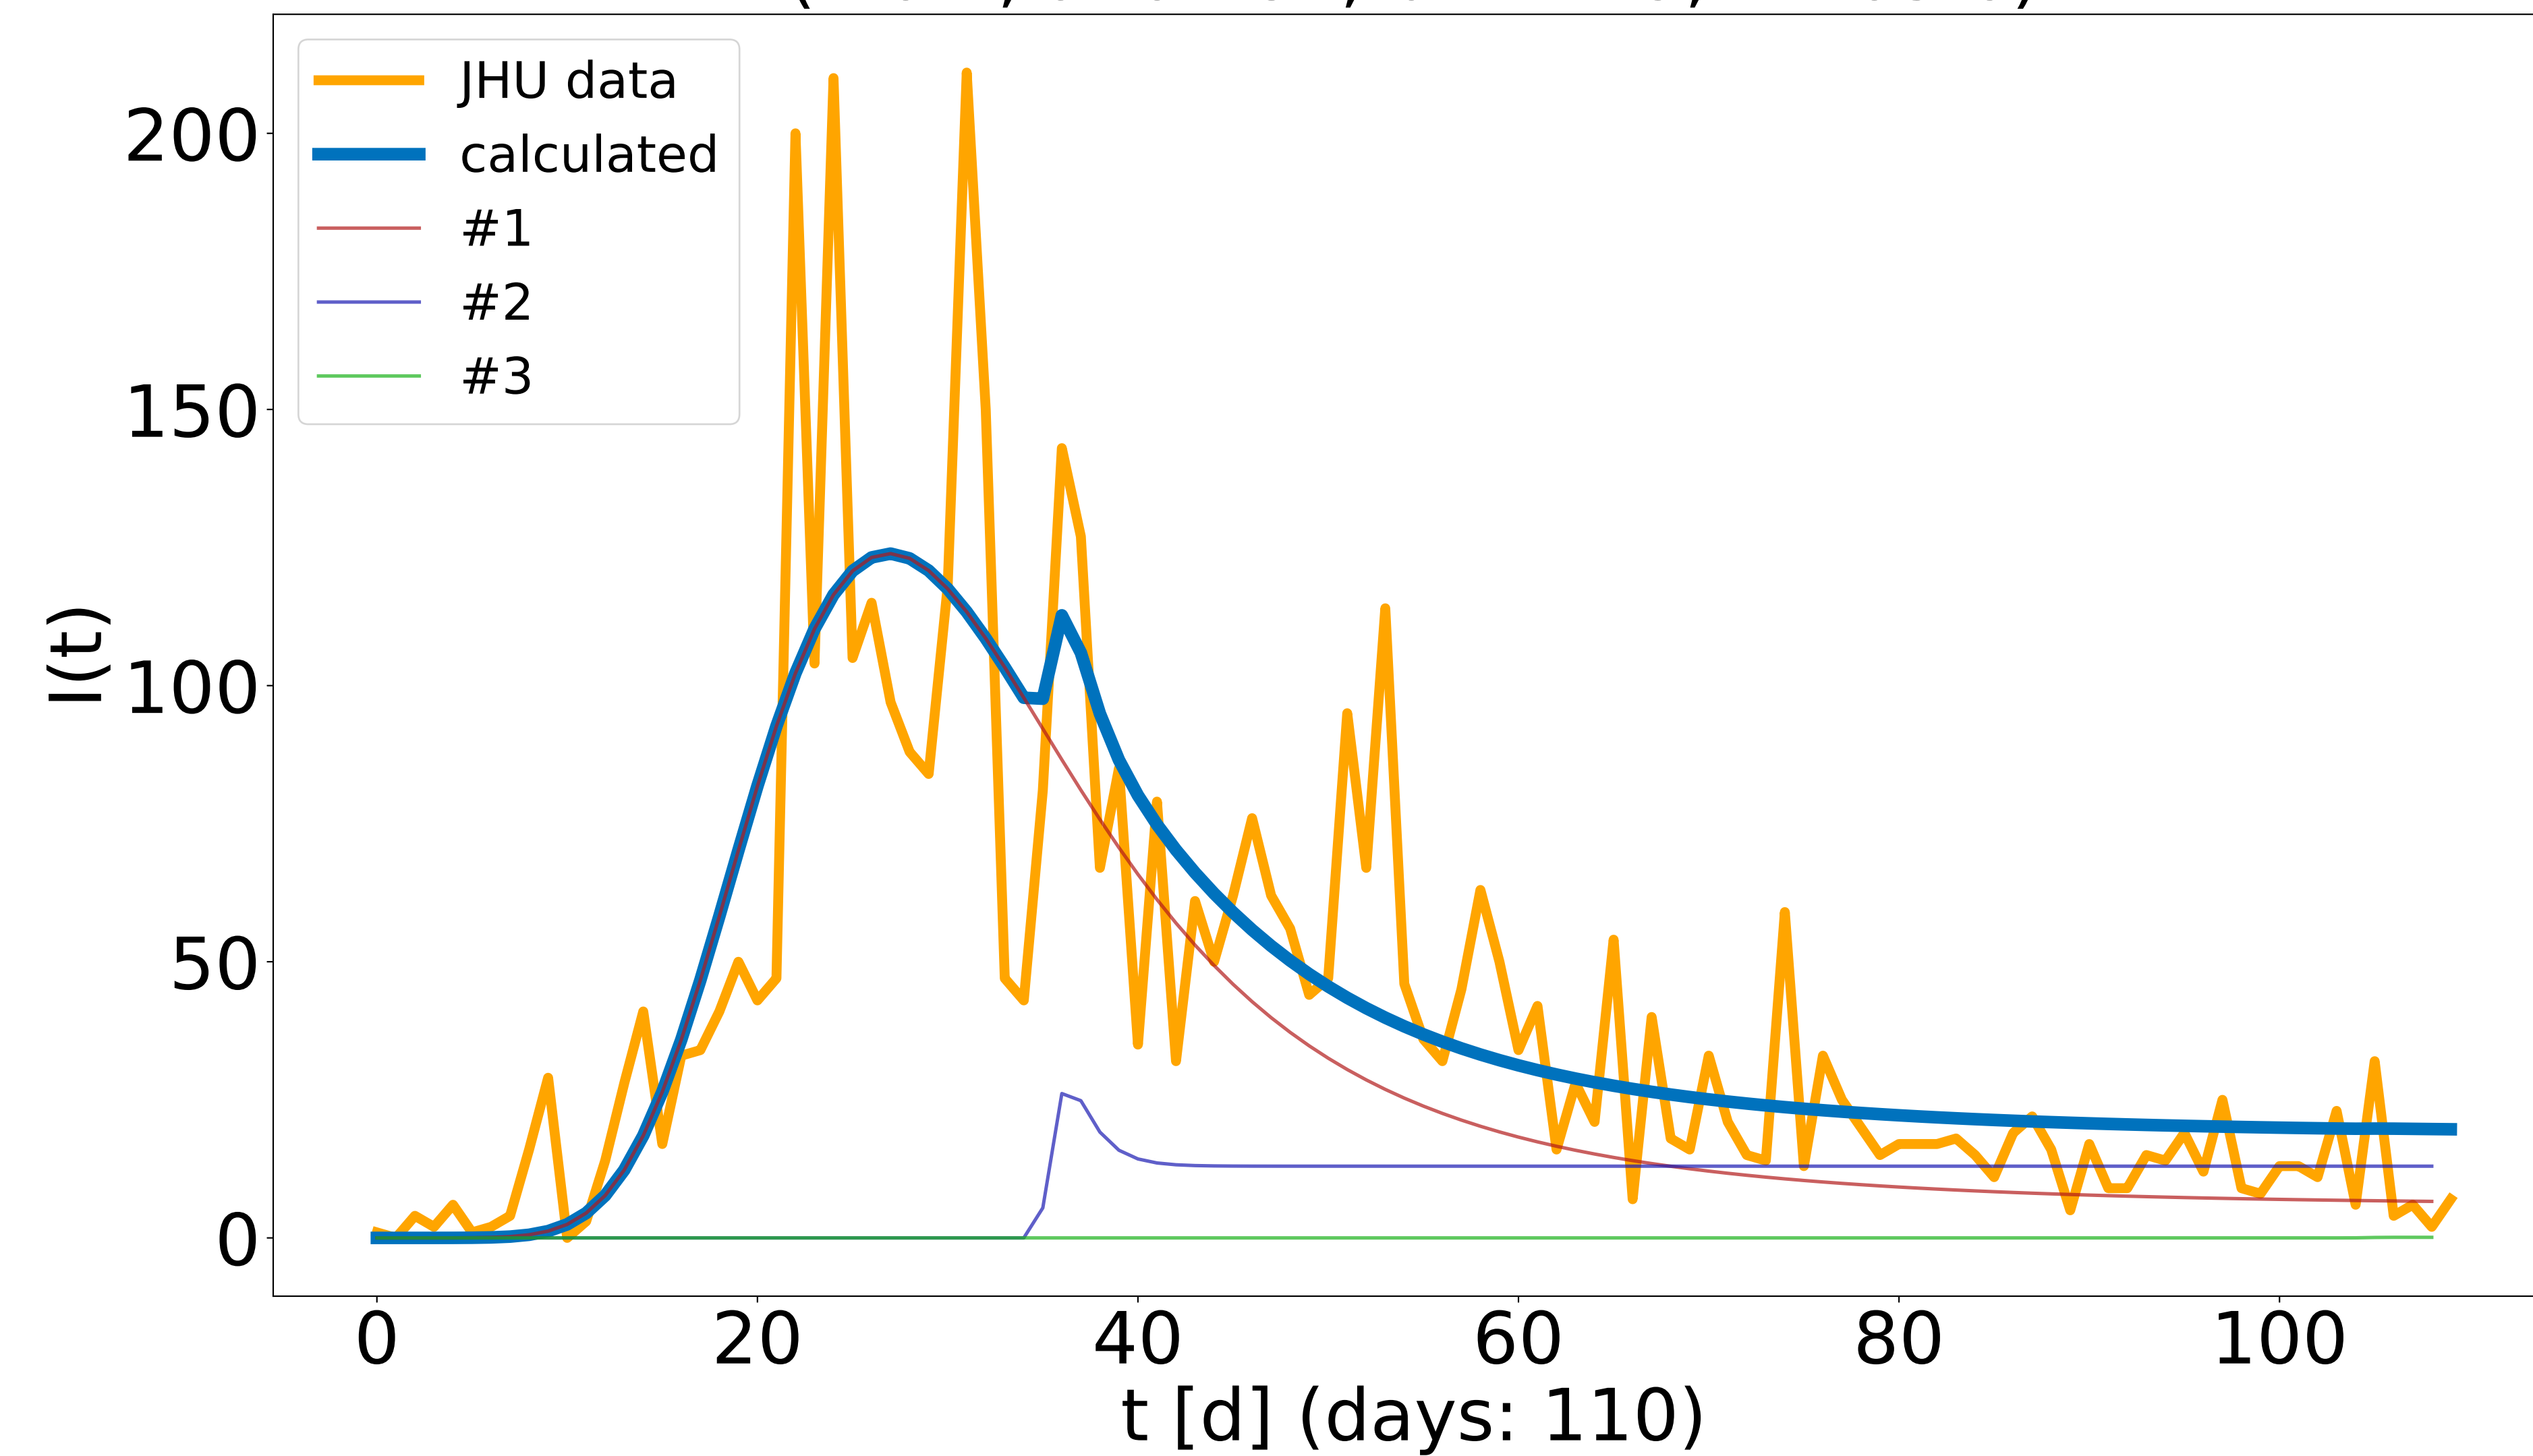

Berks, Pennsylvania, US, Berks ( $R^2 = 0.978$ )

(i: 4.5, a: 0.533, b: 0.059, t: 10.5)

(i: 8.1, a: 0.587, b: 0.148, t: 45.2)

(i: 3.4, a: 1.724, b: 1.399, t: 132.7)

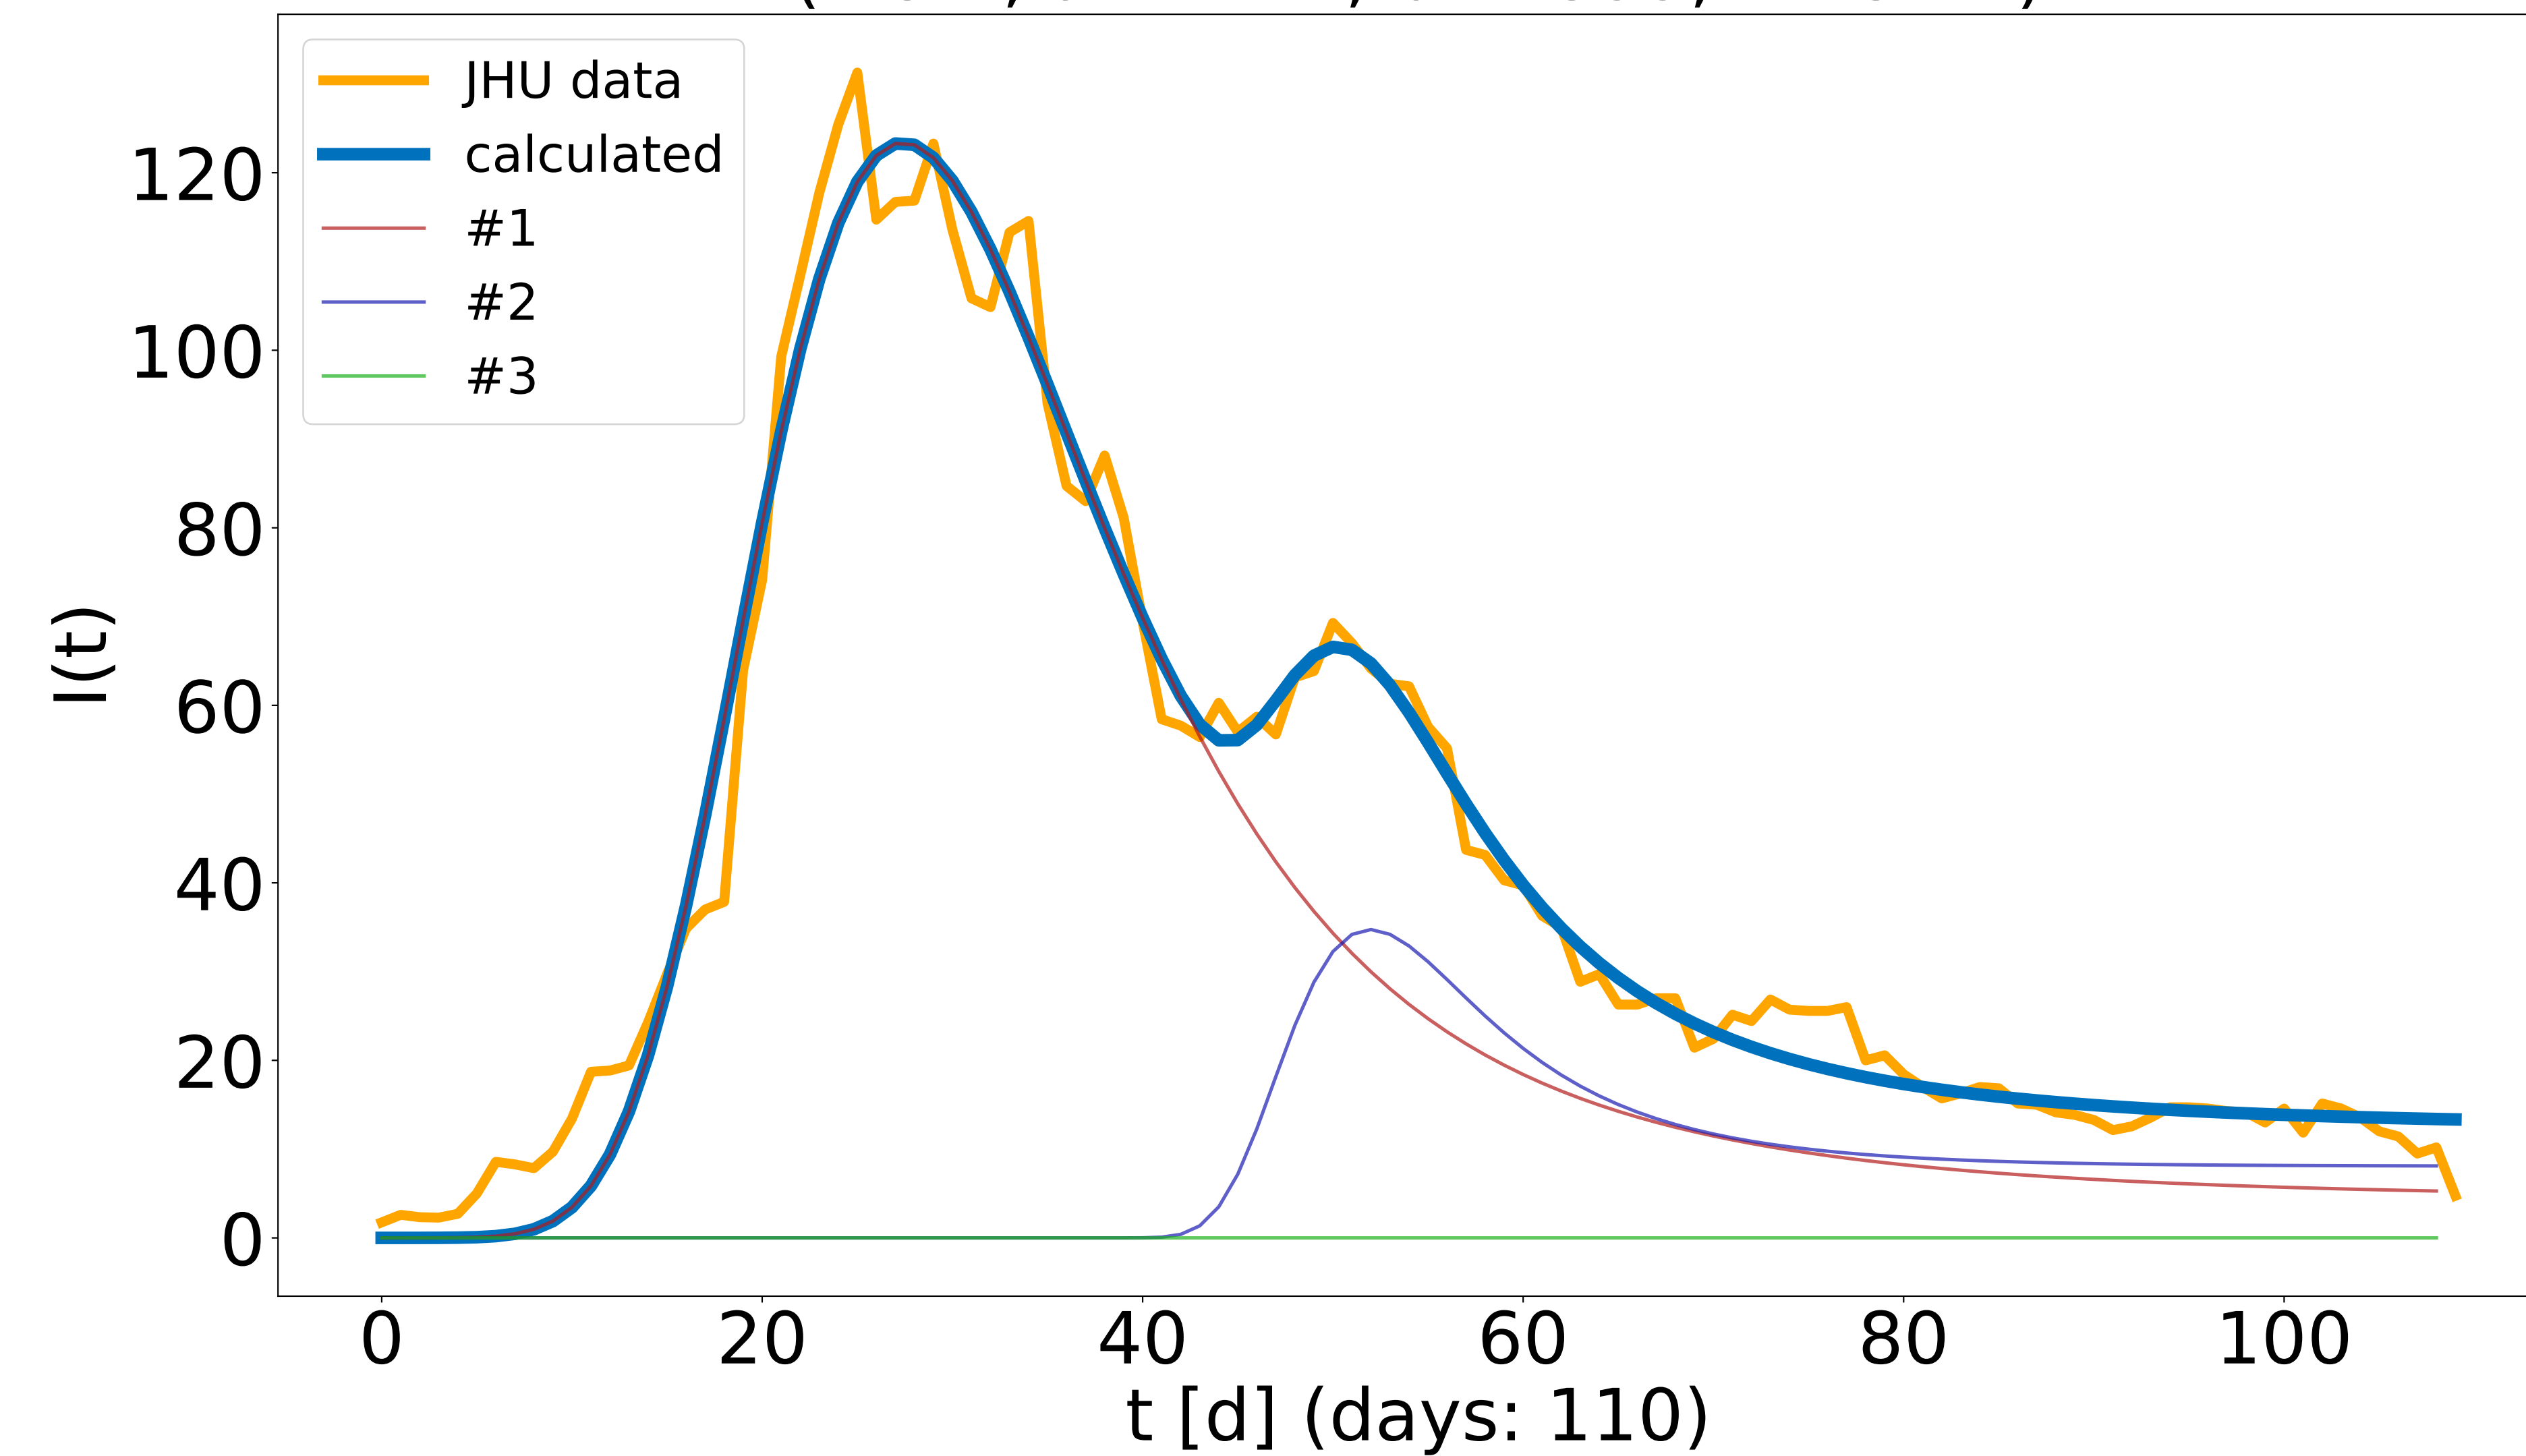

Delaware, Pennsylvania, US, Delaware ( $R^2 = 0.764$ )

(i: 0.8, a: 0.301, b: 0.022, t: 1.0)

(i: 2.3, a: 1.916, b: 1.4, t: 111.5)

(i: 10.5, a: 1.319, b: 1.4, t: 115.7)

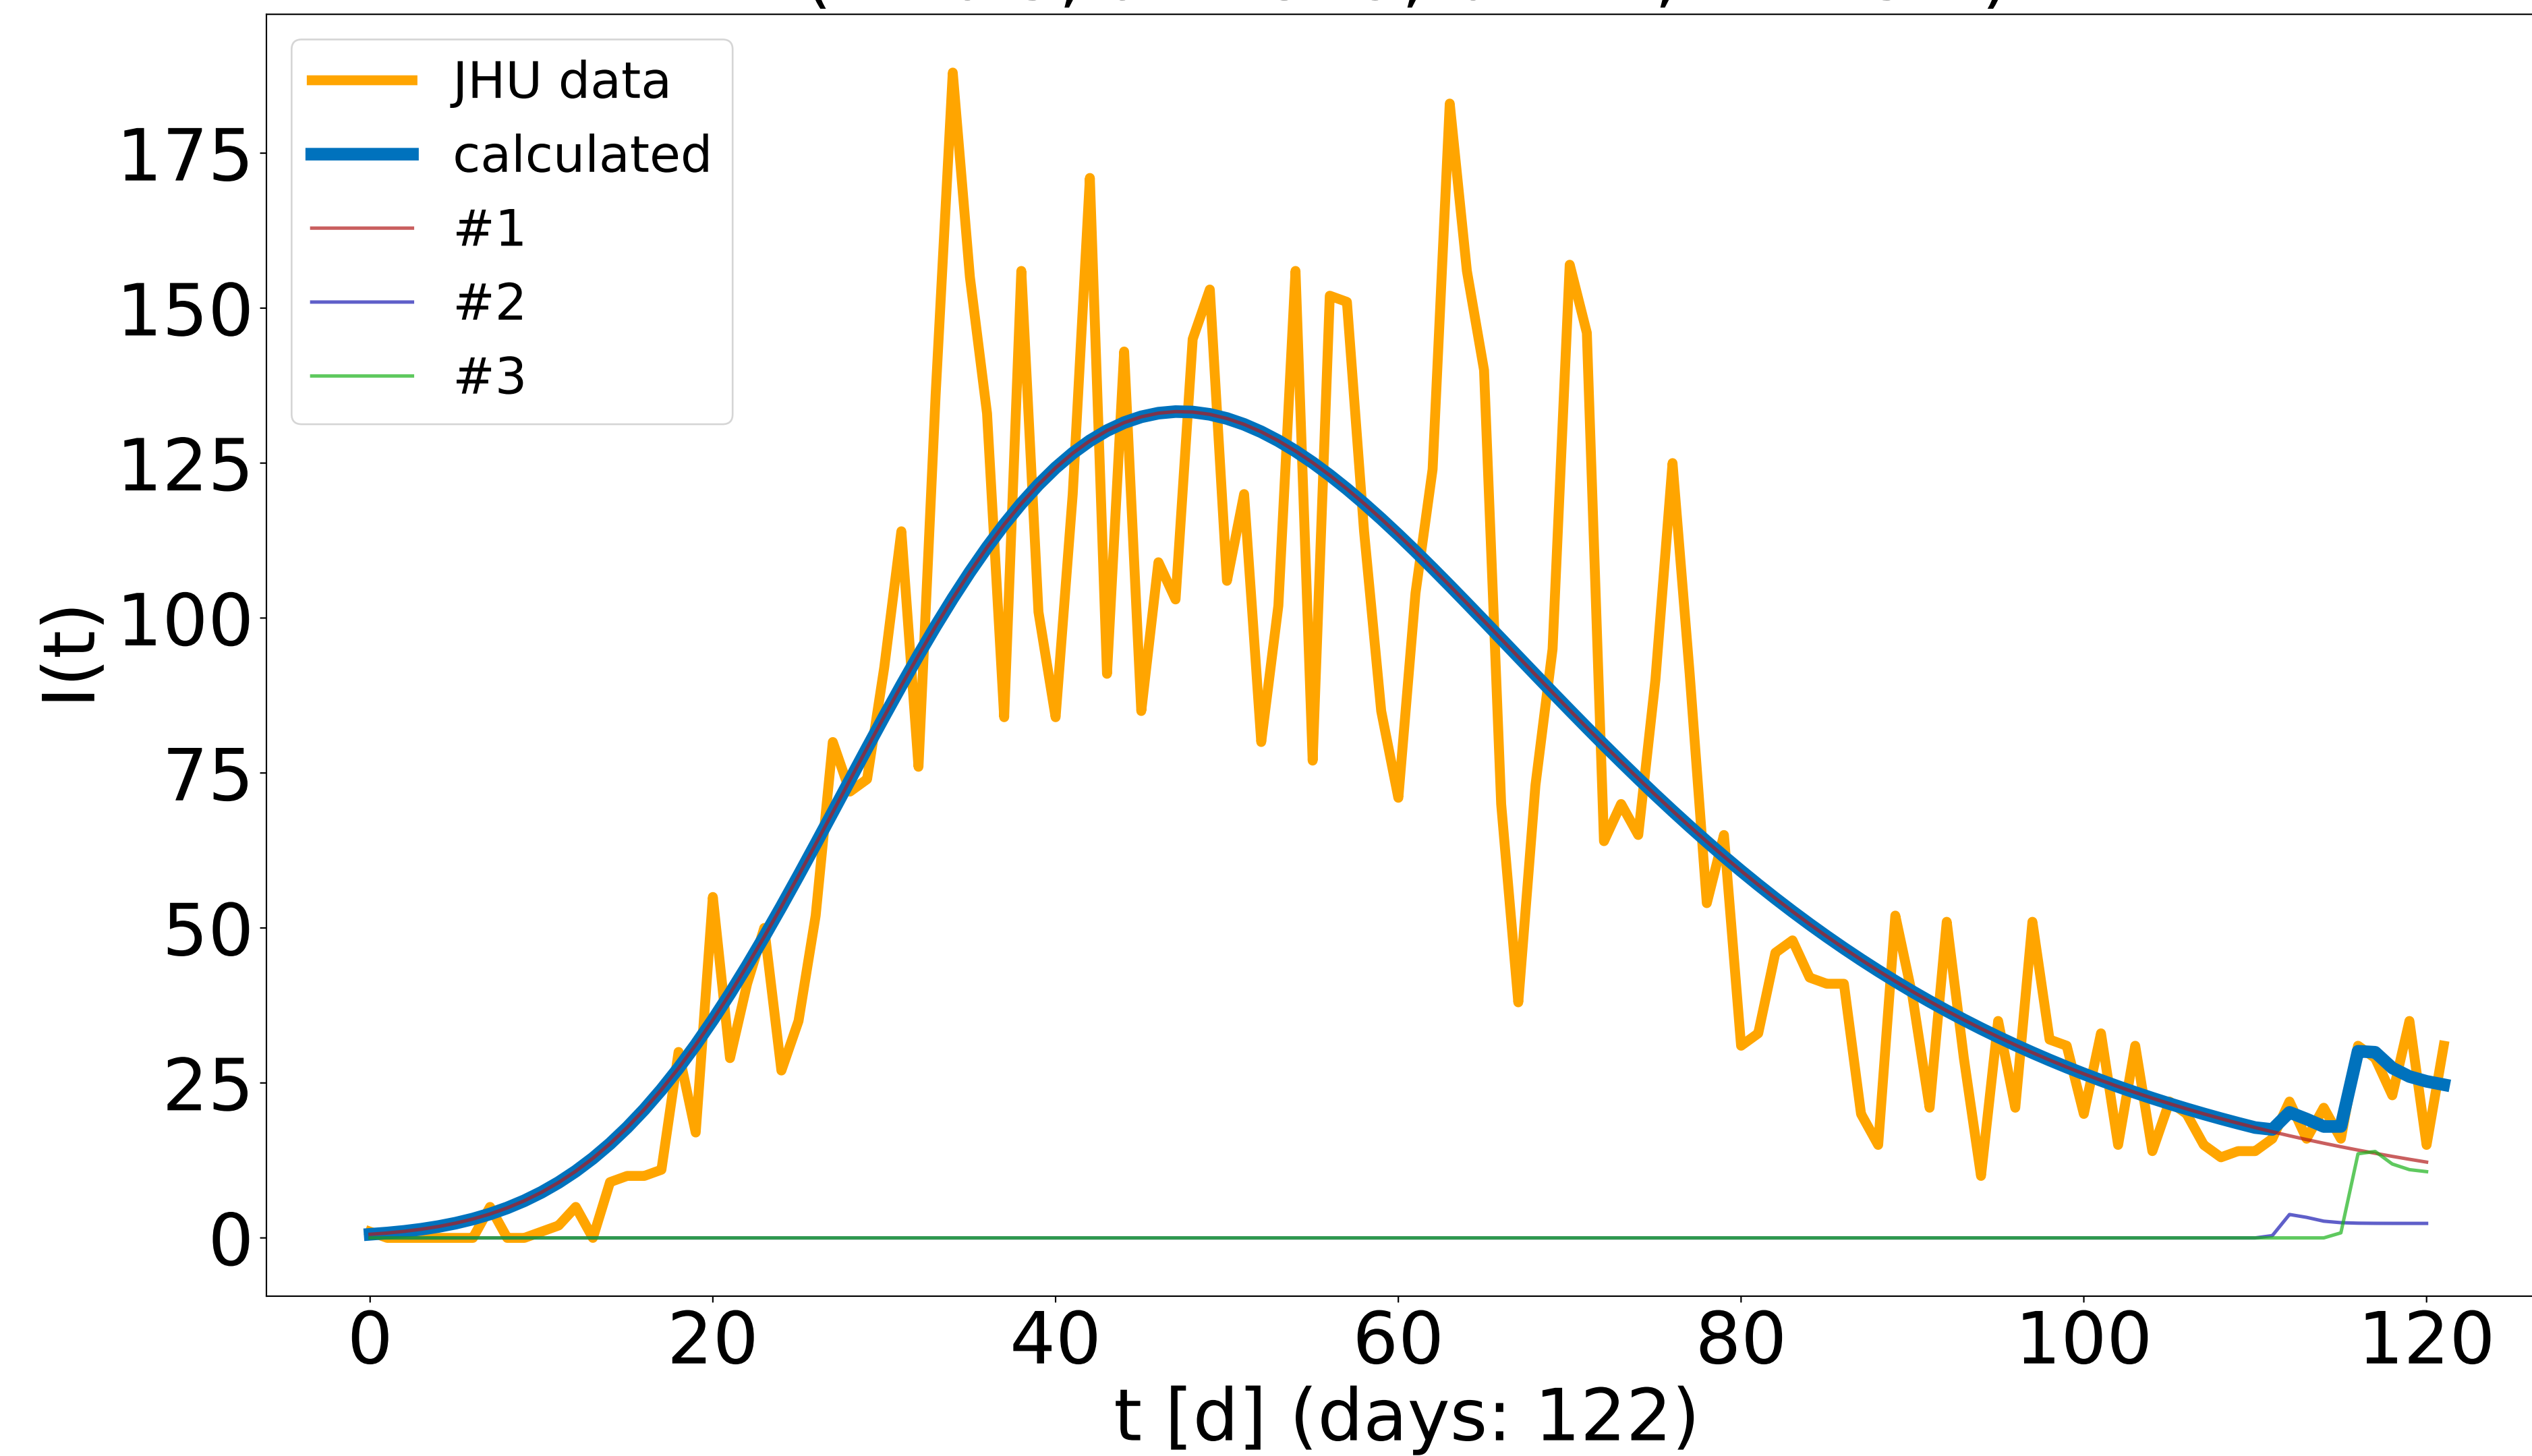

Delaware, Pennsylvania, US, Delaware ( $R^2 = 0.984$ )

(i: 9.0, a: 0.313, b: 0.044, t: 16.2)

(i: 0.1, a: 0.663, b: 0.038, t: 38.8)

(i: 13.0, a: 0.001, b: 0.394, t: 125.0)

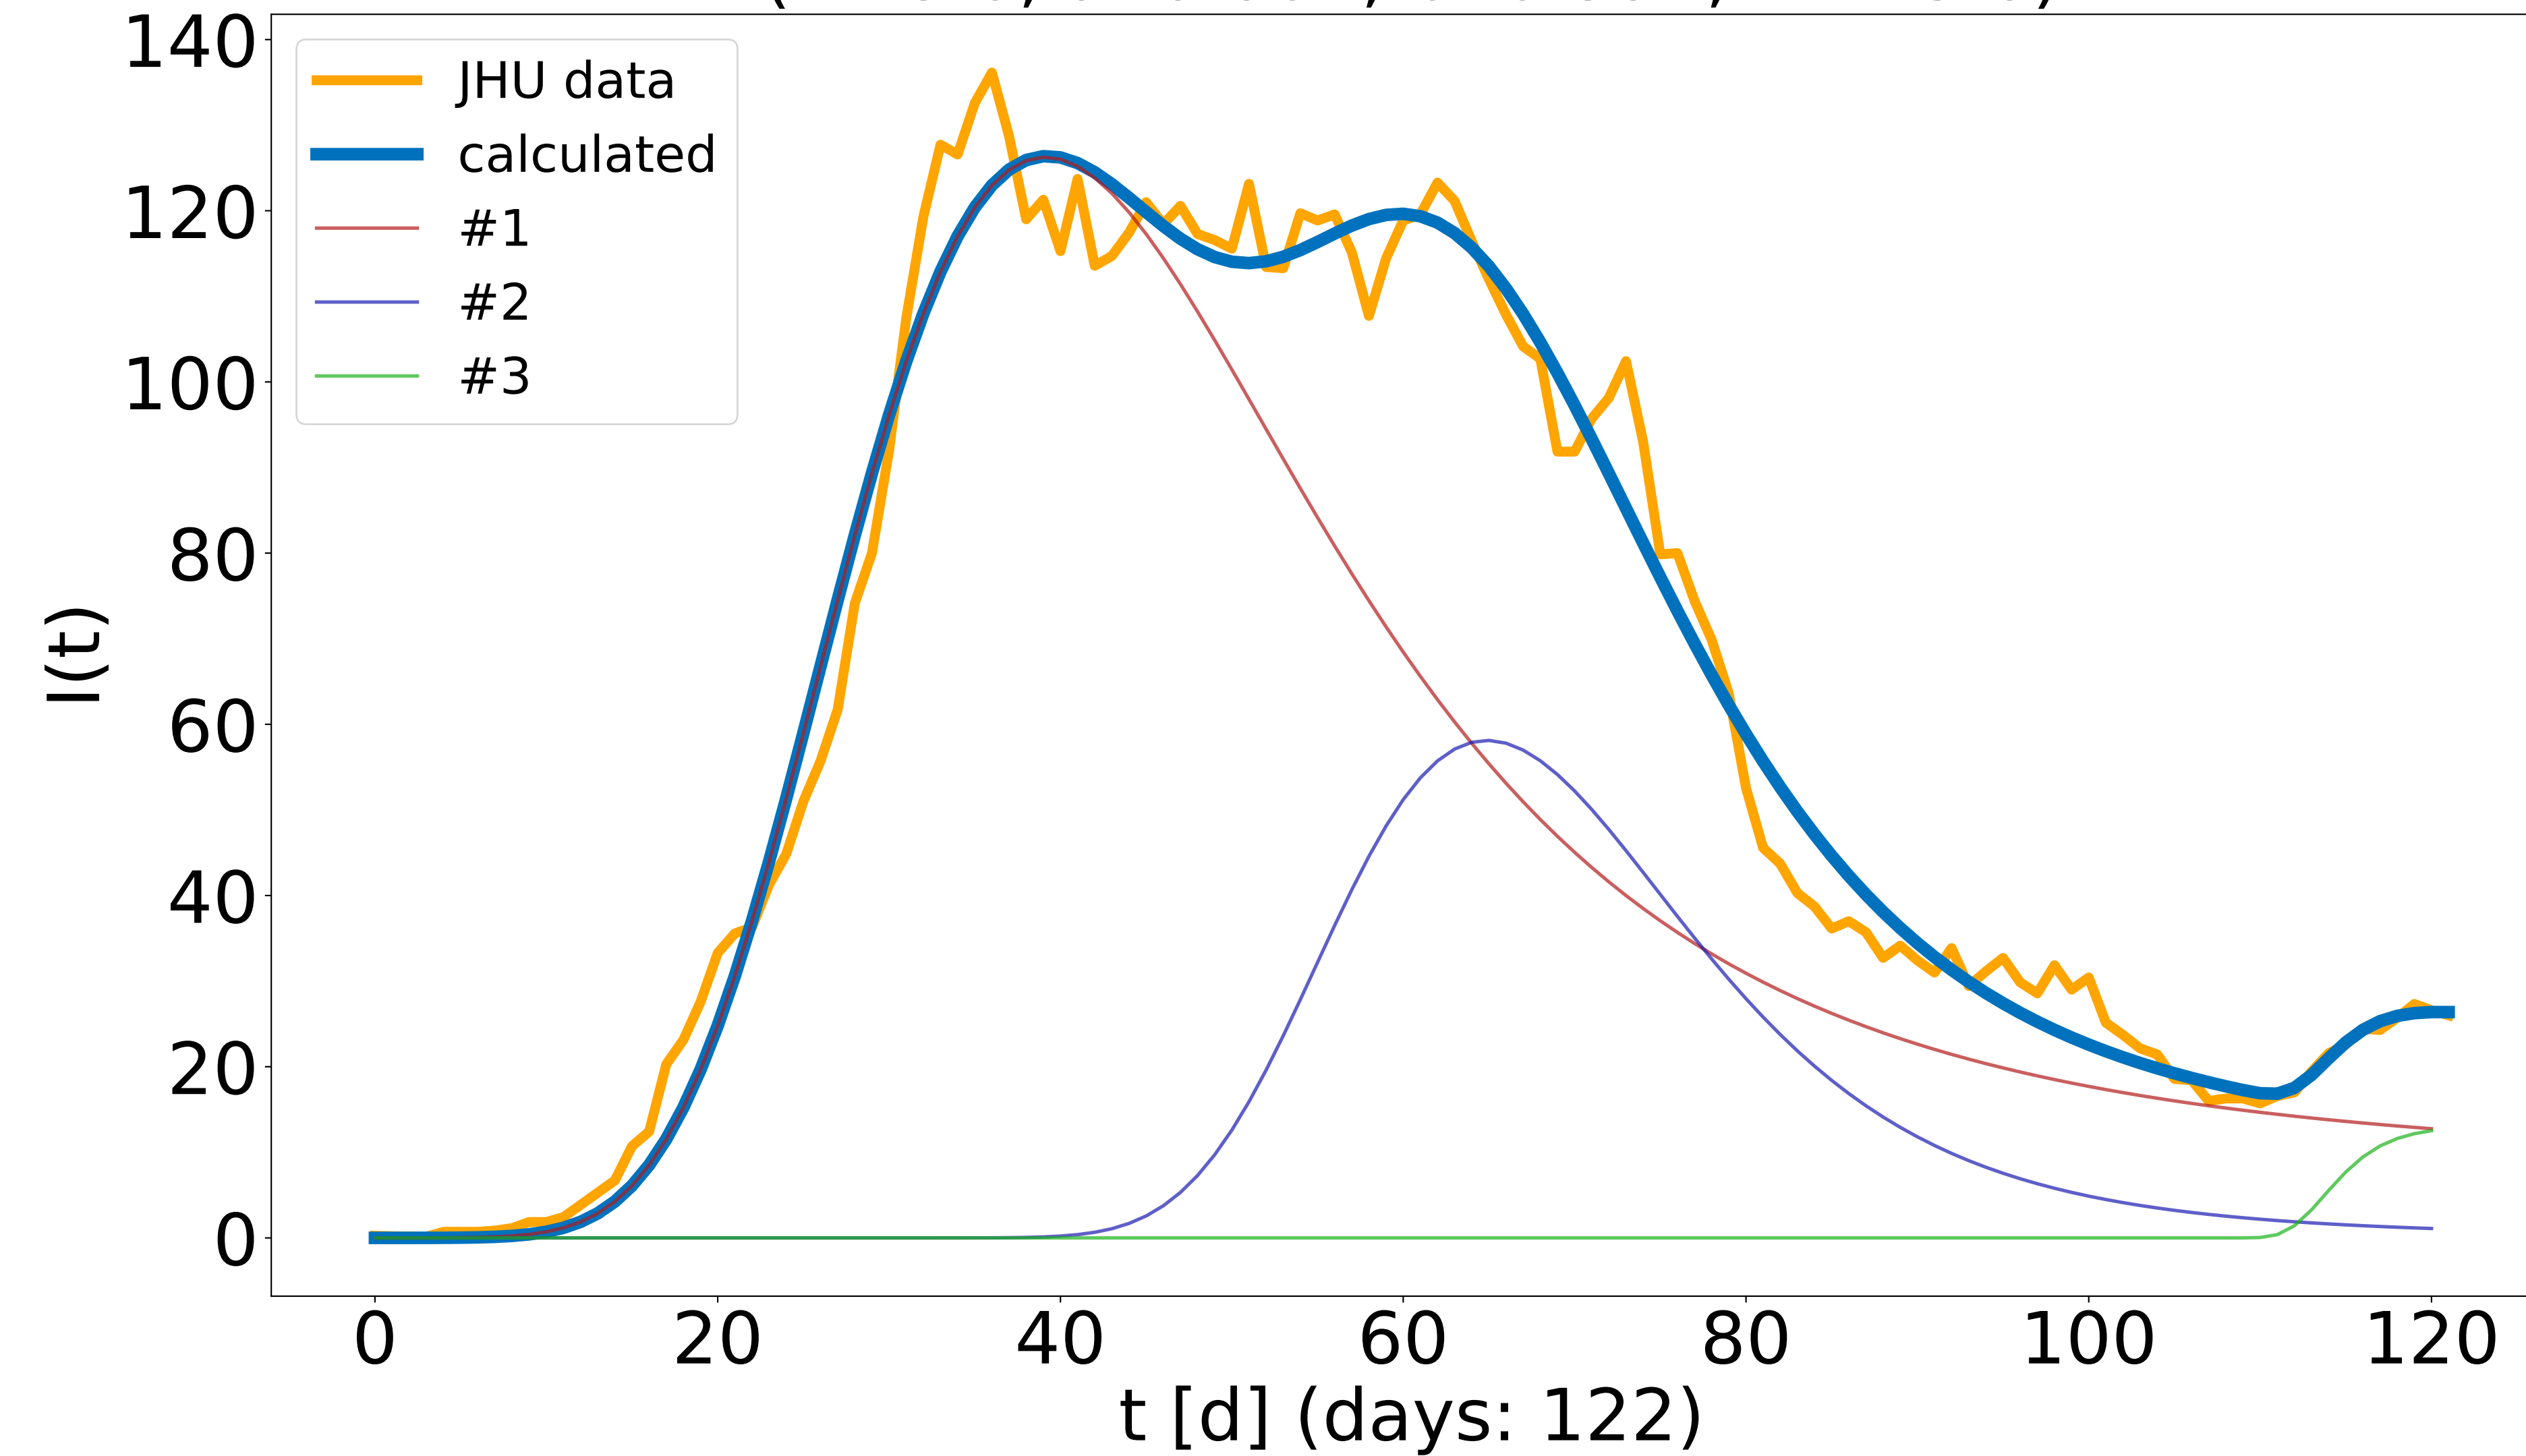



Lehigh, Pennsylvania, US, Lehigh ( $R^2 = 0.796$ )  
(i: 2.4, a: 0.259, b: 0.03, t: 1.0)  
(i: 0.1, a: 1.753, b: 0.093, t: 8.8)  
(i: 8.2, a: 2.0, b: 0.75, t: 94.1)

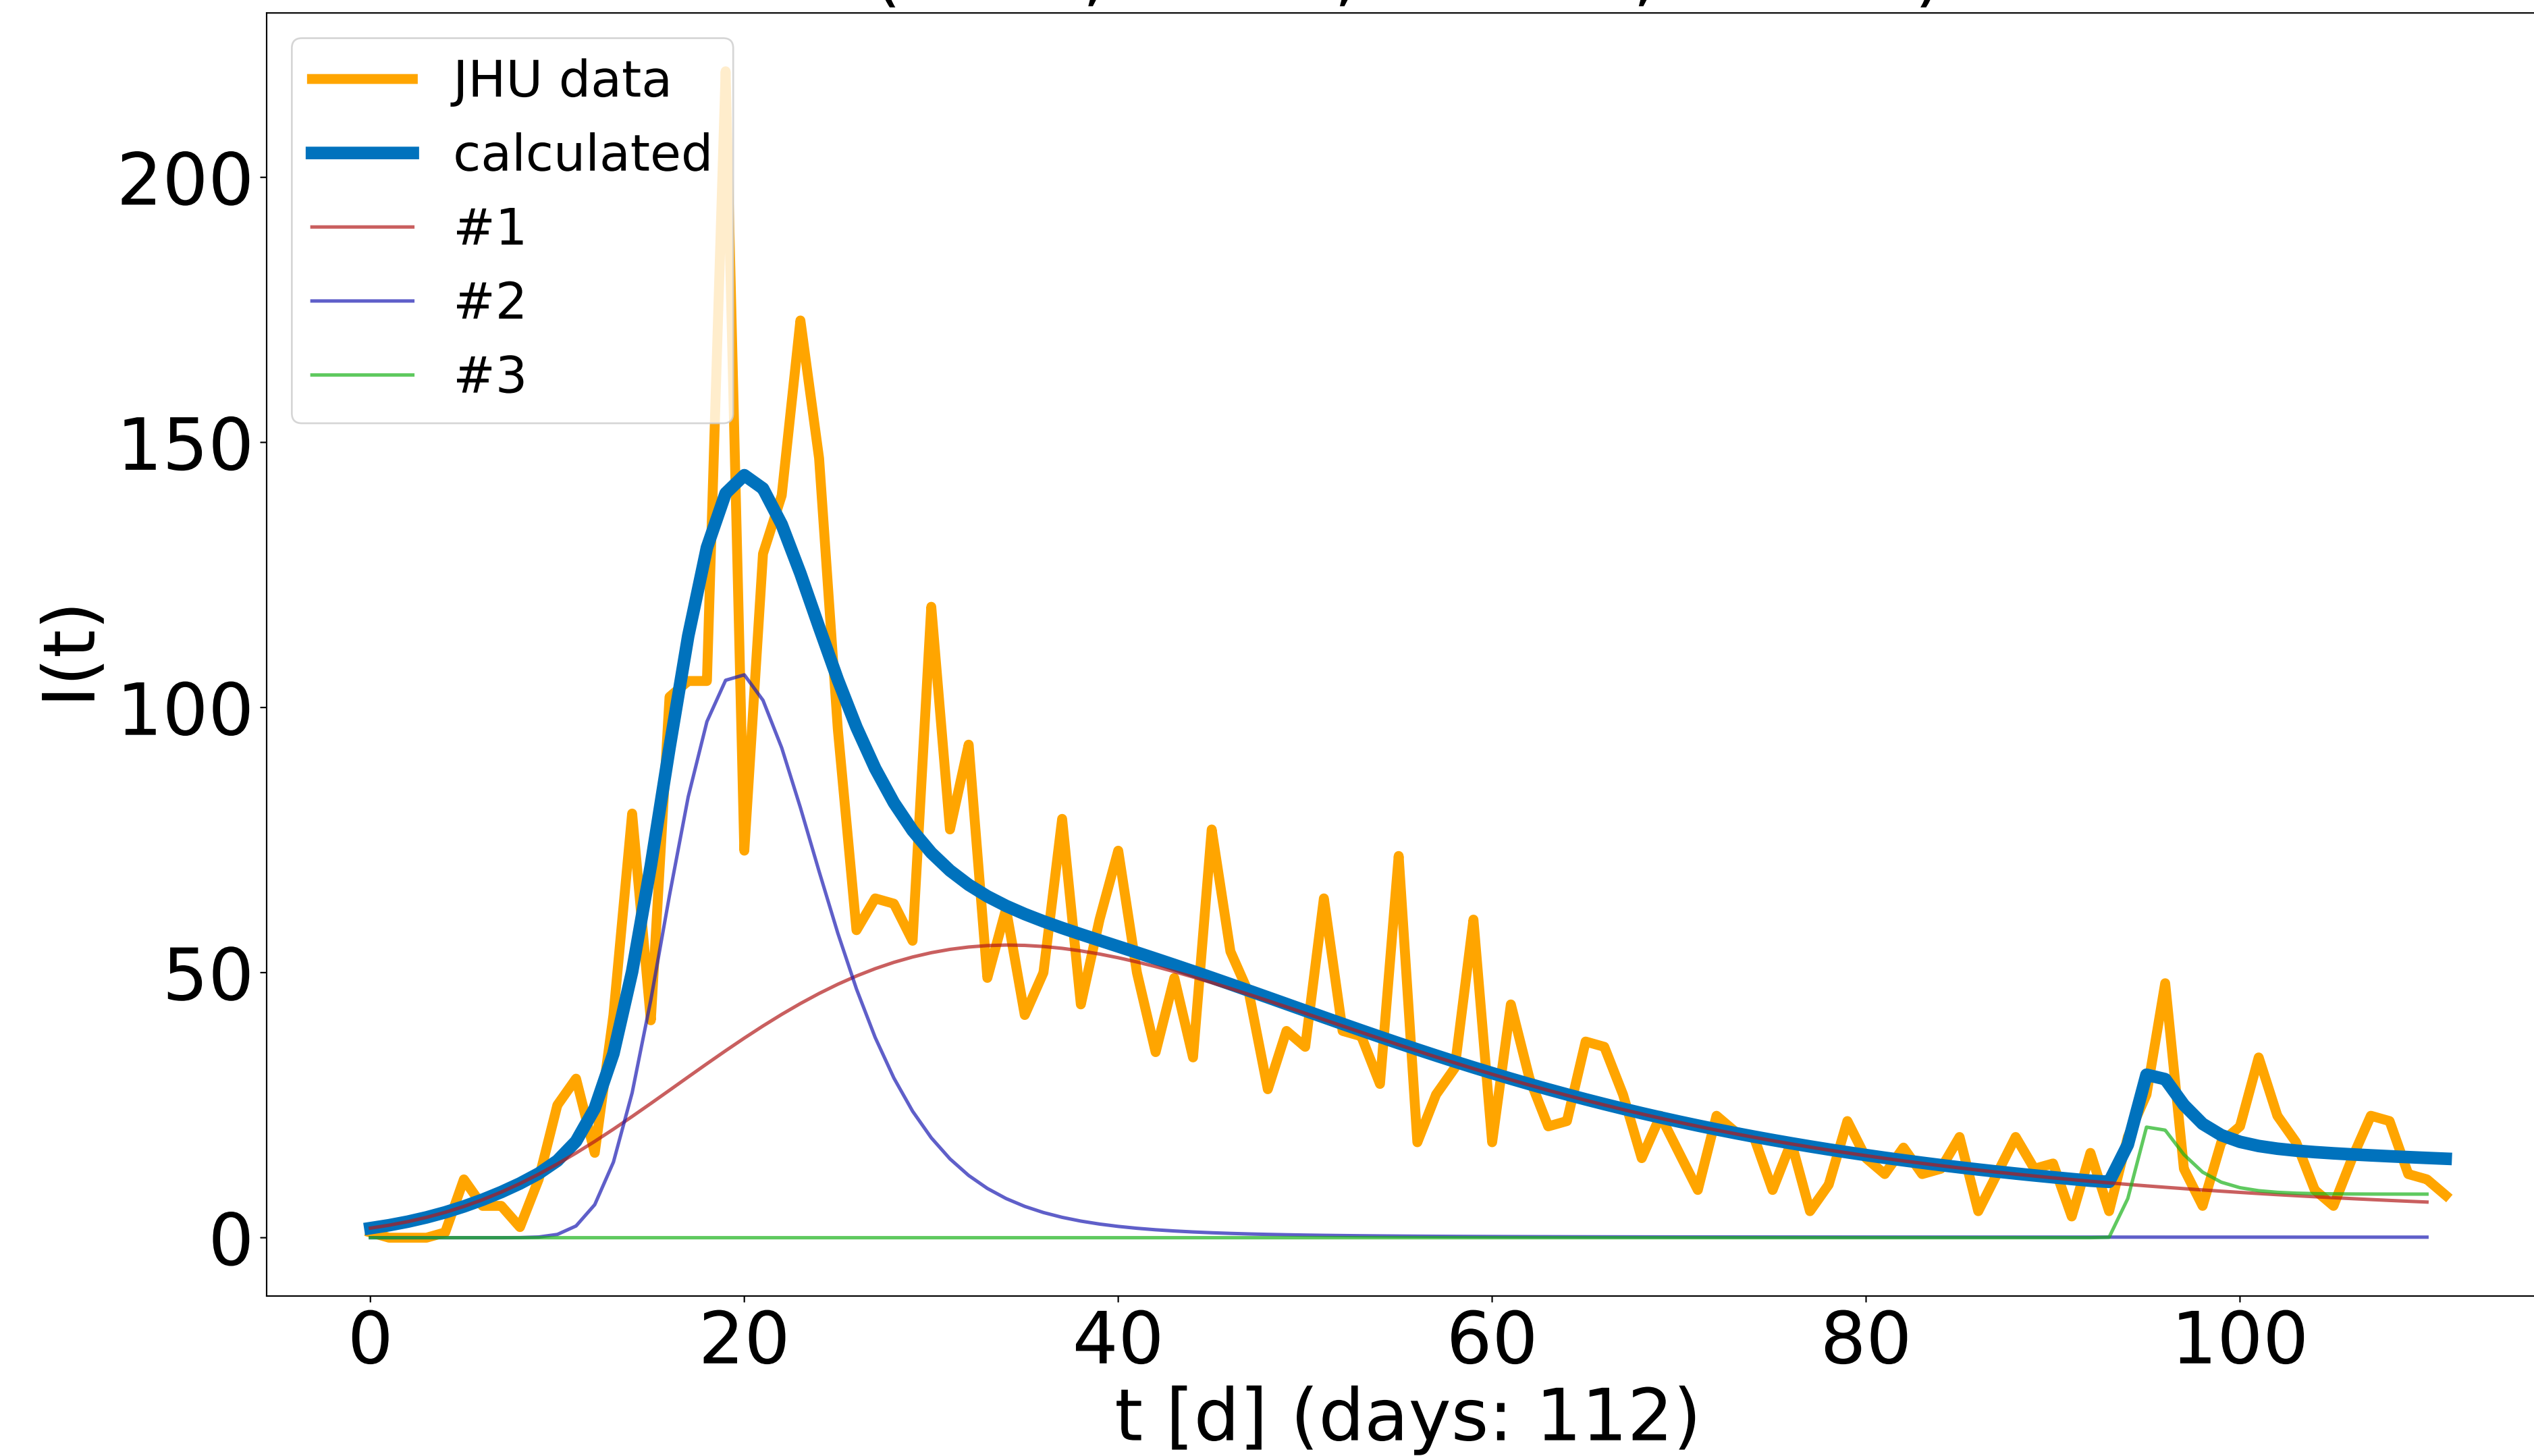

Lehigh, Pennsylvania, US, Lehigh ( $R^2 = 0.988$ )  
(i: 0.1, a: 1.184, b: 0.061, t: 3.9)  
(i: 4.7, a: 0.293, b: 0.048, t: 23.4)  
(i: 4.5, a: 0.489, b: 0.173, t: 91.9)

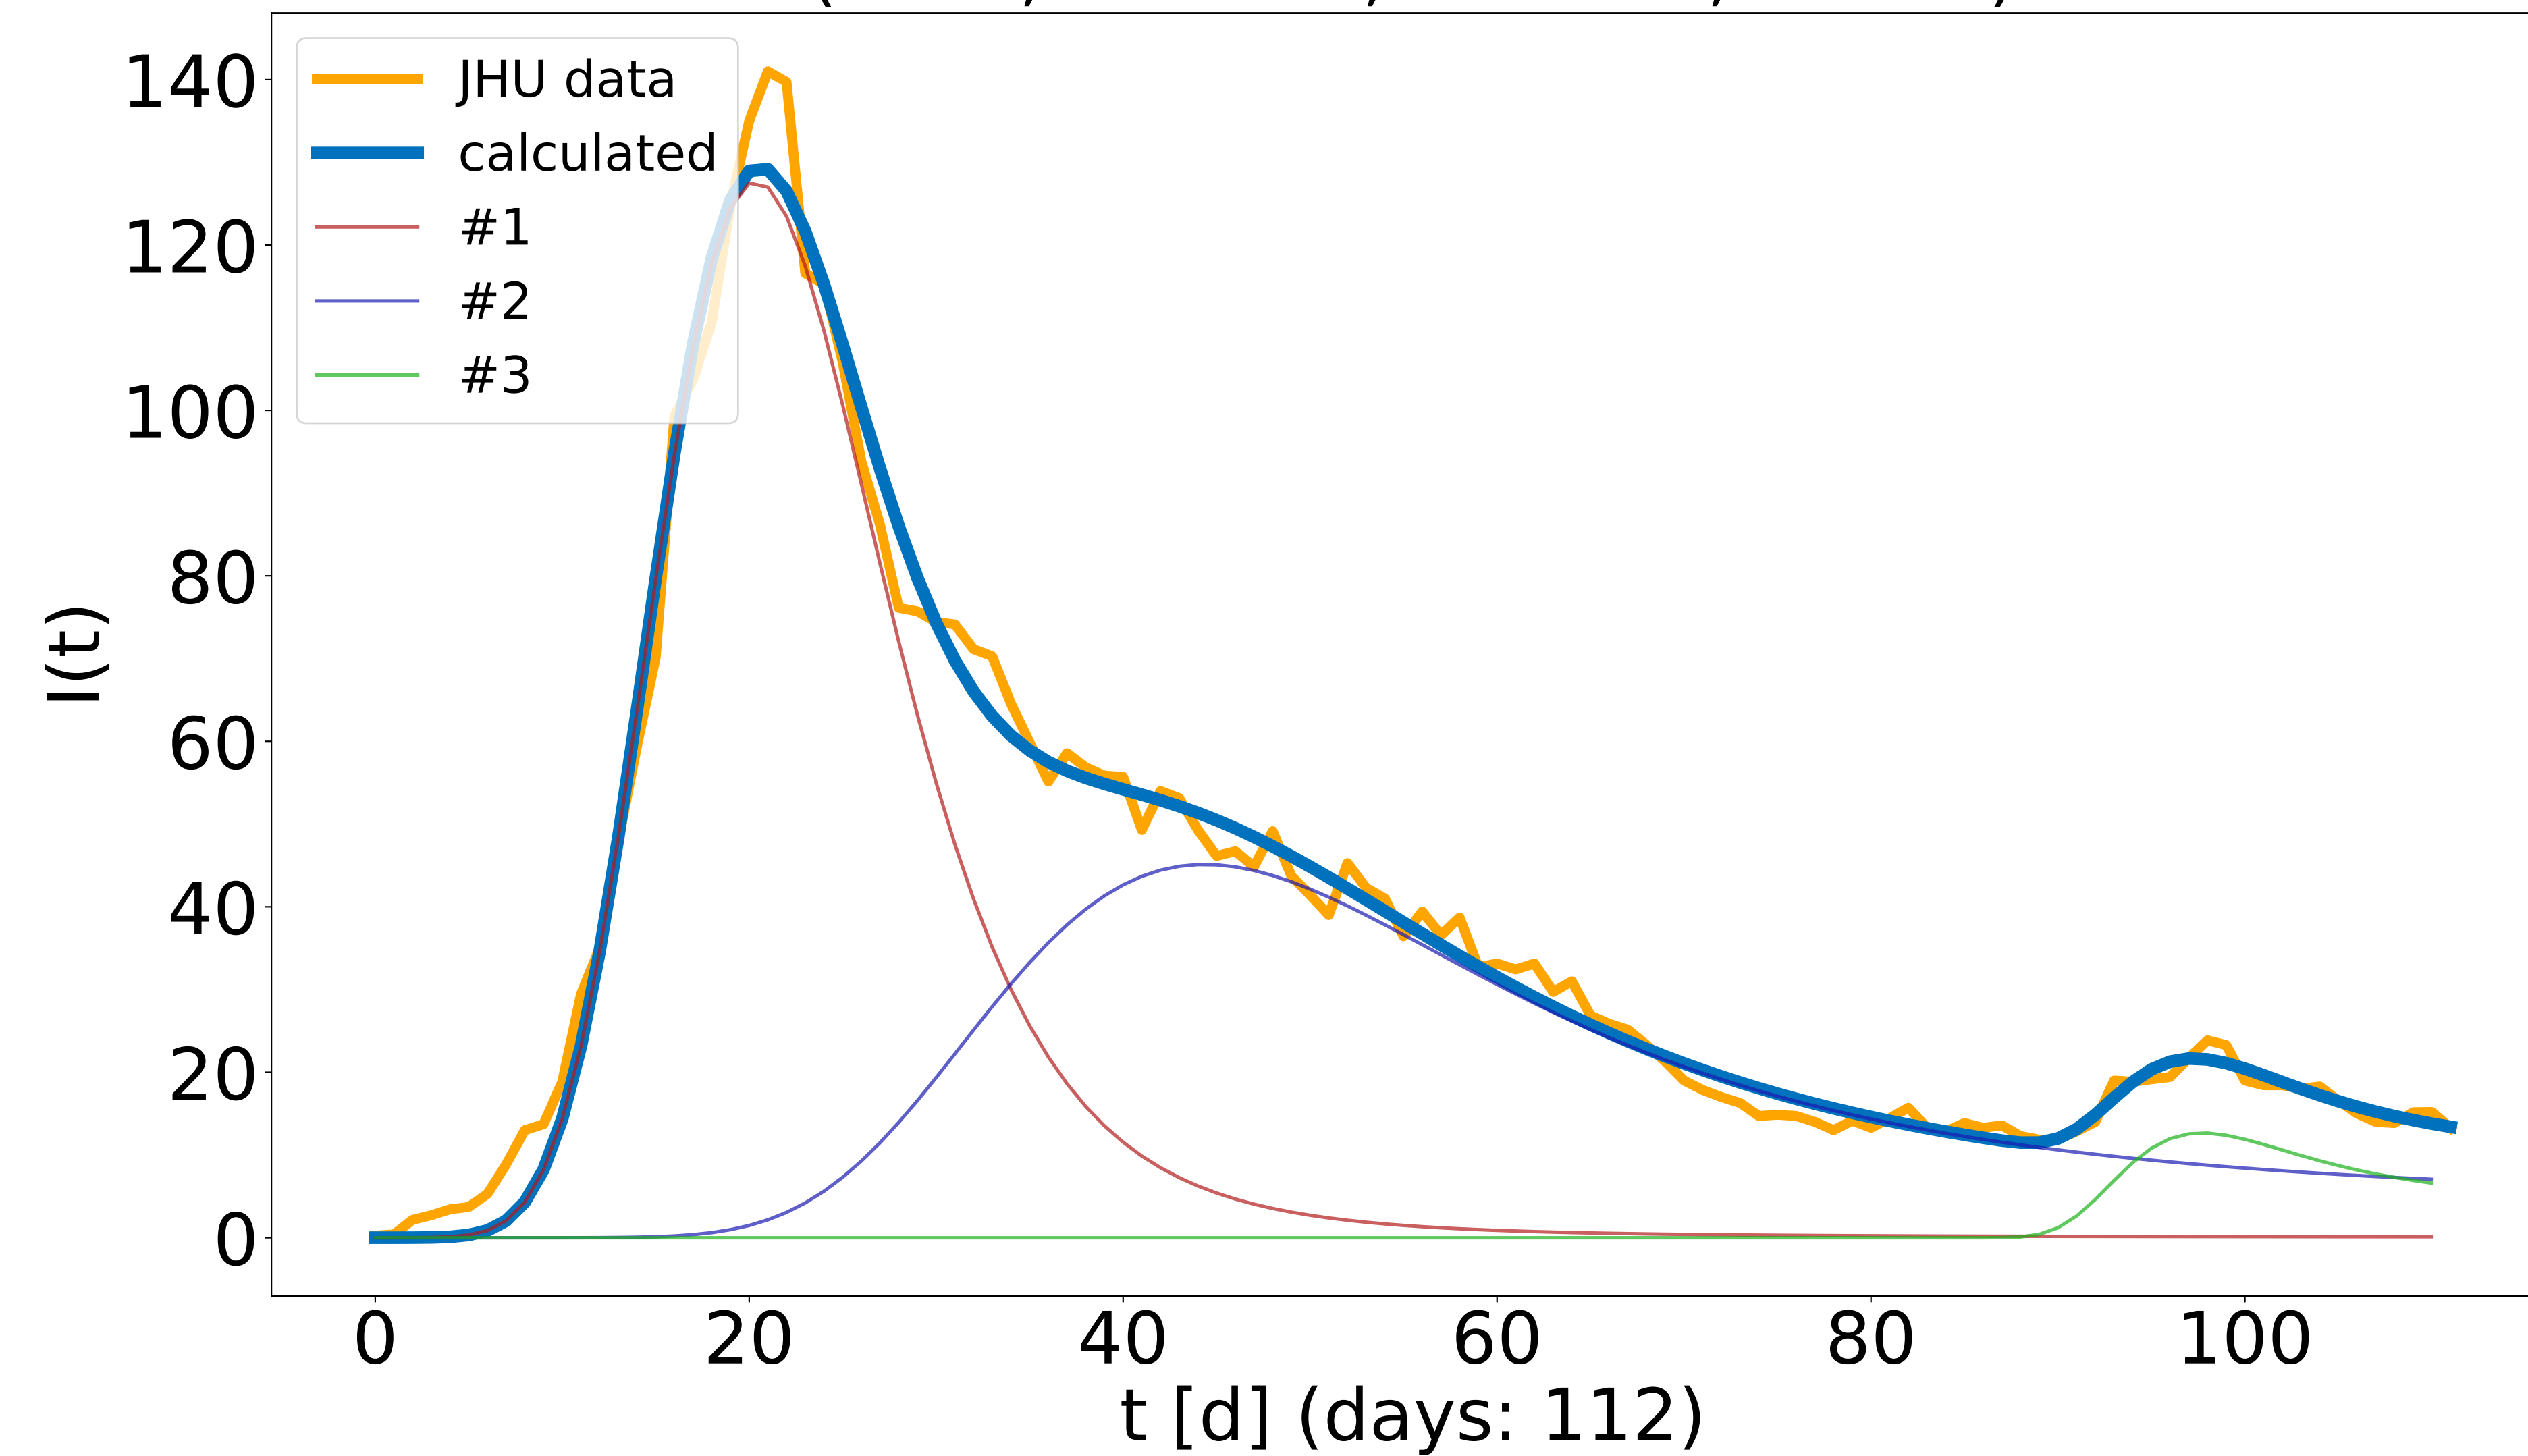



Luzerne, Pennsylvania, US, Luzerne ( $R^2 = 0.885$ )

(i: 1.0, a: 0.273, b: 0.029, t: 1.0)

(i: 0.1, a: 1.781, b: 0.094, t: 8.9)

(i: 3.6, a: 2.0, b: 0.859, t: 107.3)

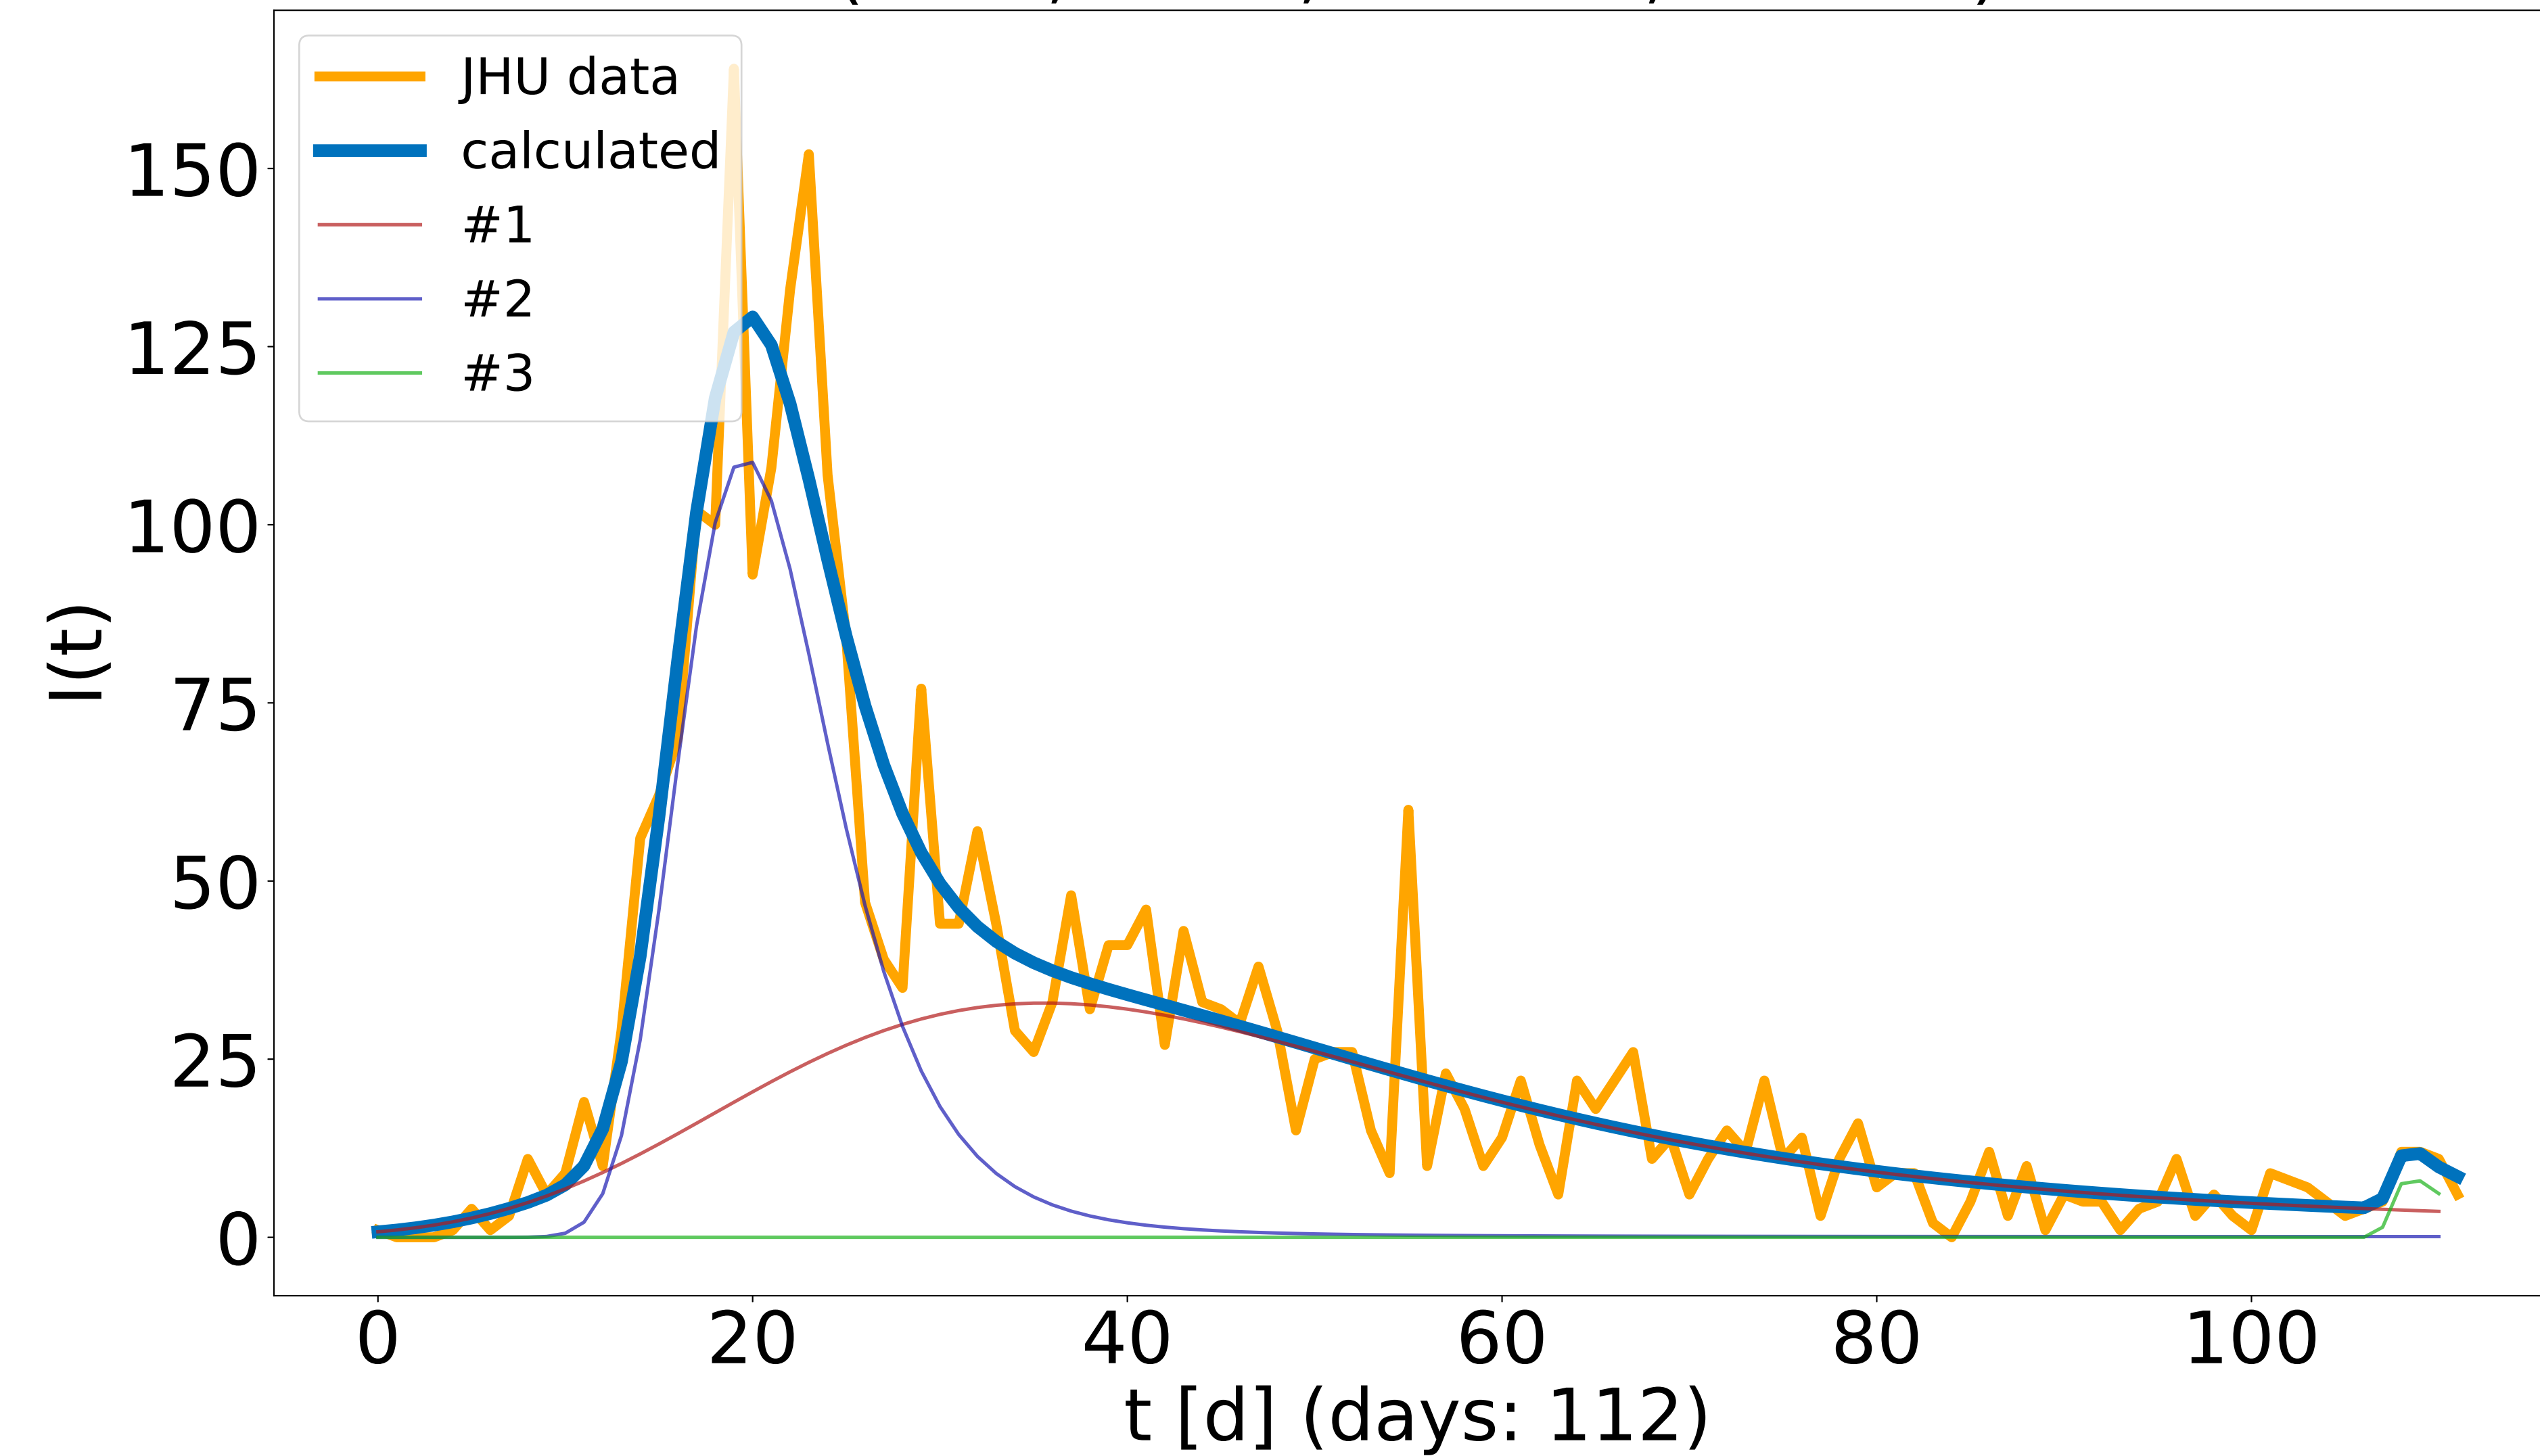

Luzerne, Pennsylvania, US, Luzerne ( $R^2 = 0.99$ )

(i: 0.1, a: 1.314, b: 0.068, t: 5.6)

(i: 5.2, a: 0.344, b: 0.071, t: 28.9)

(i: 8.5, a: 0.001, b: 0.214, t: 128.1)

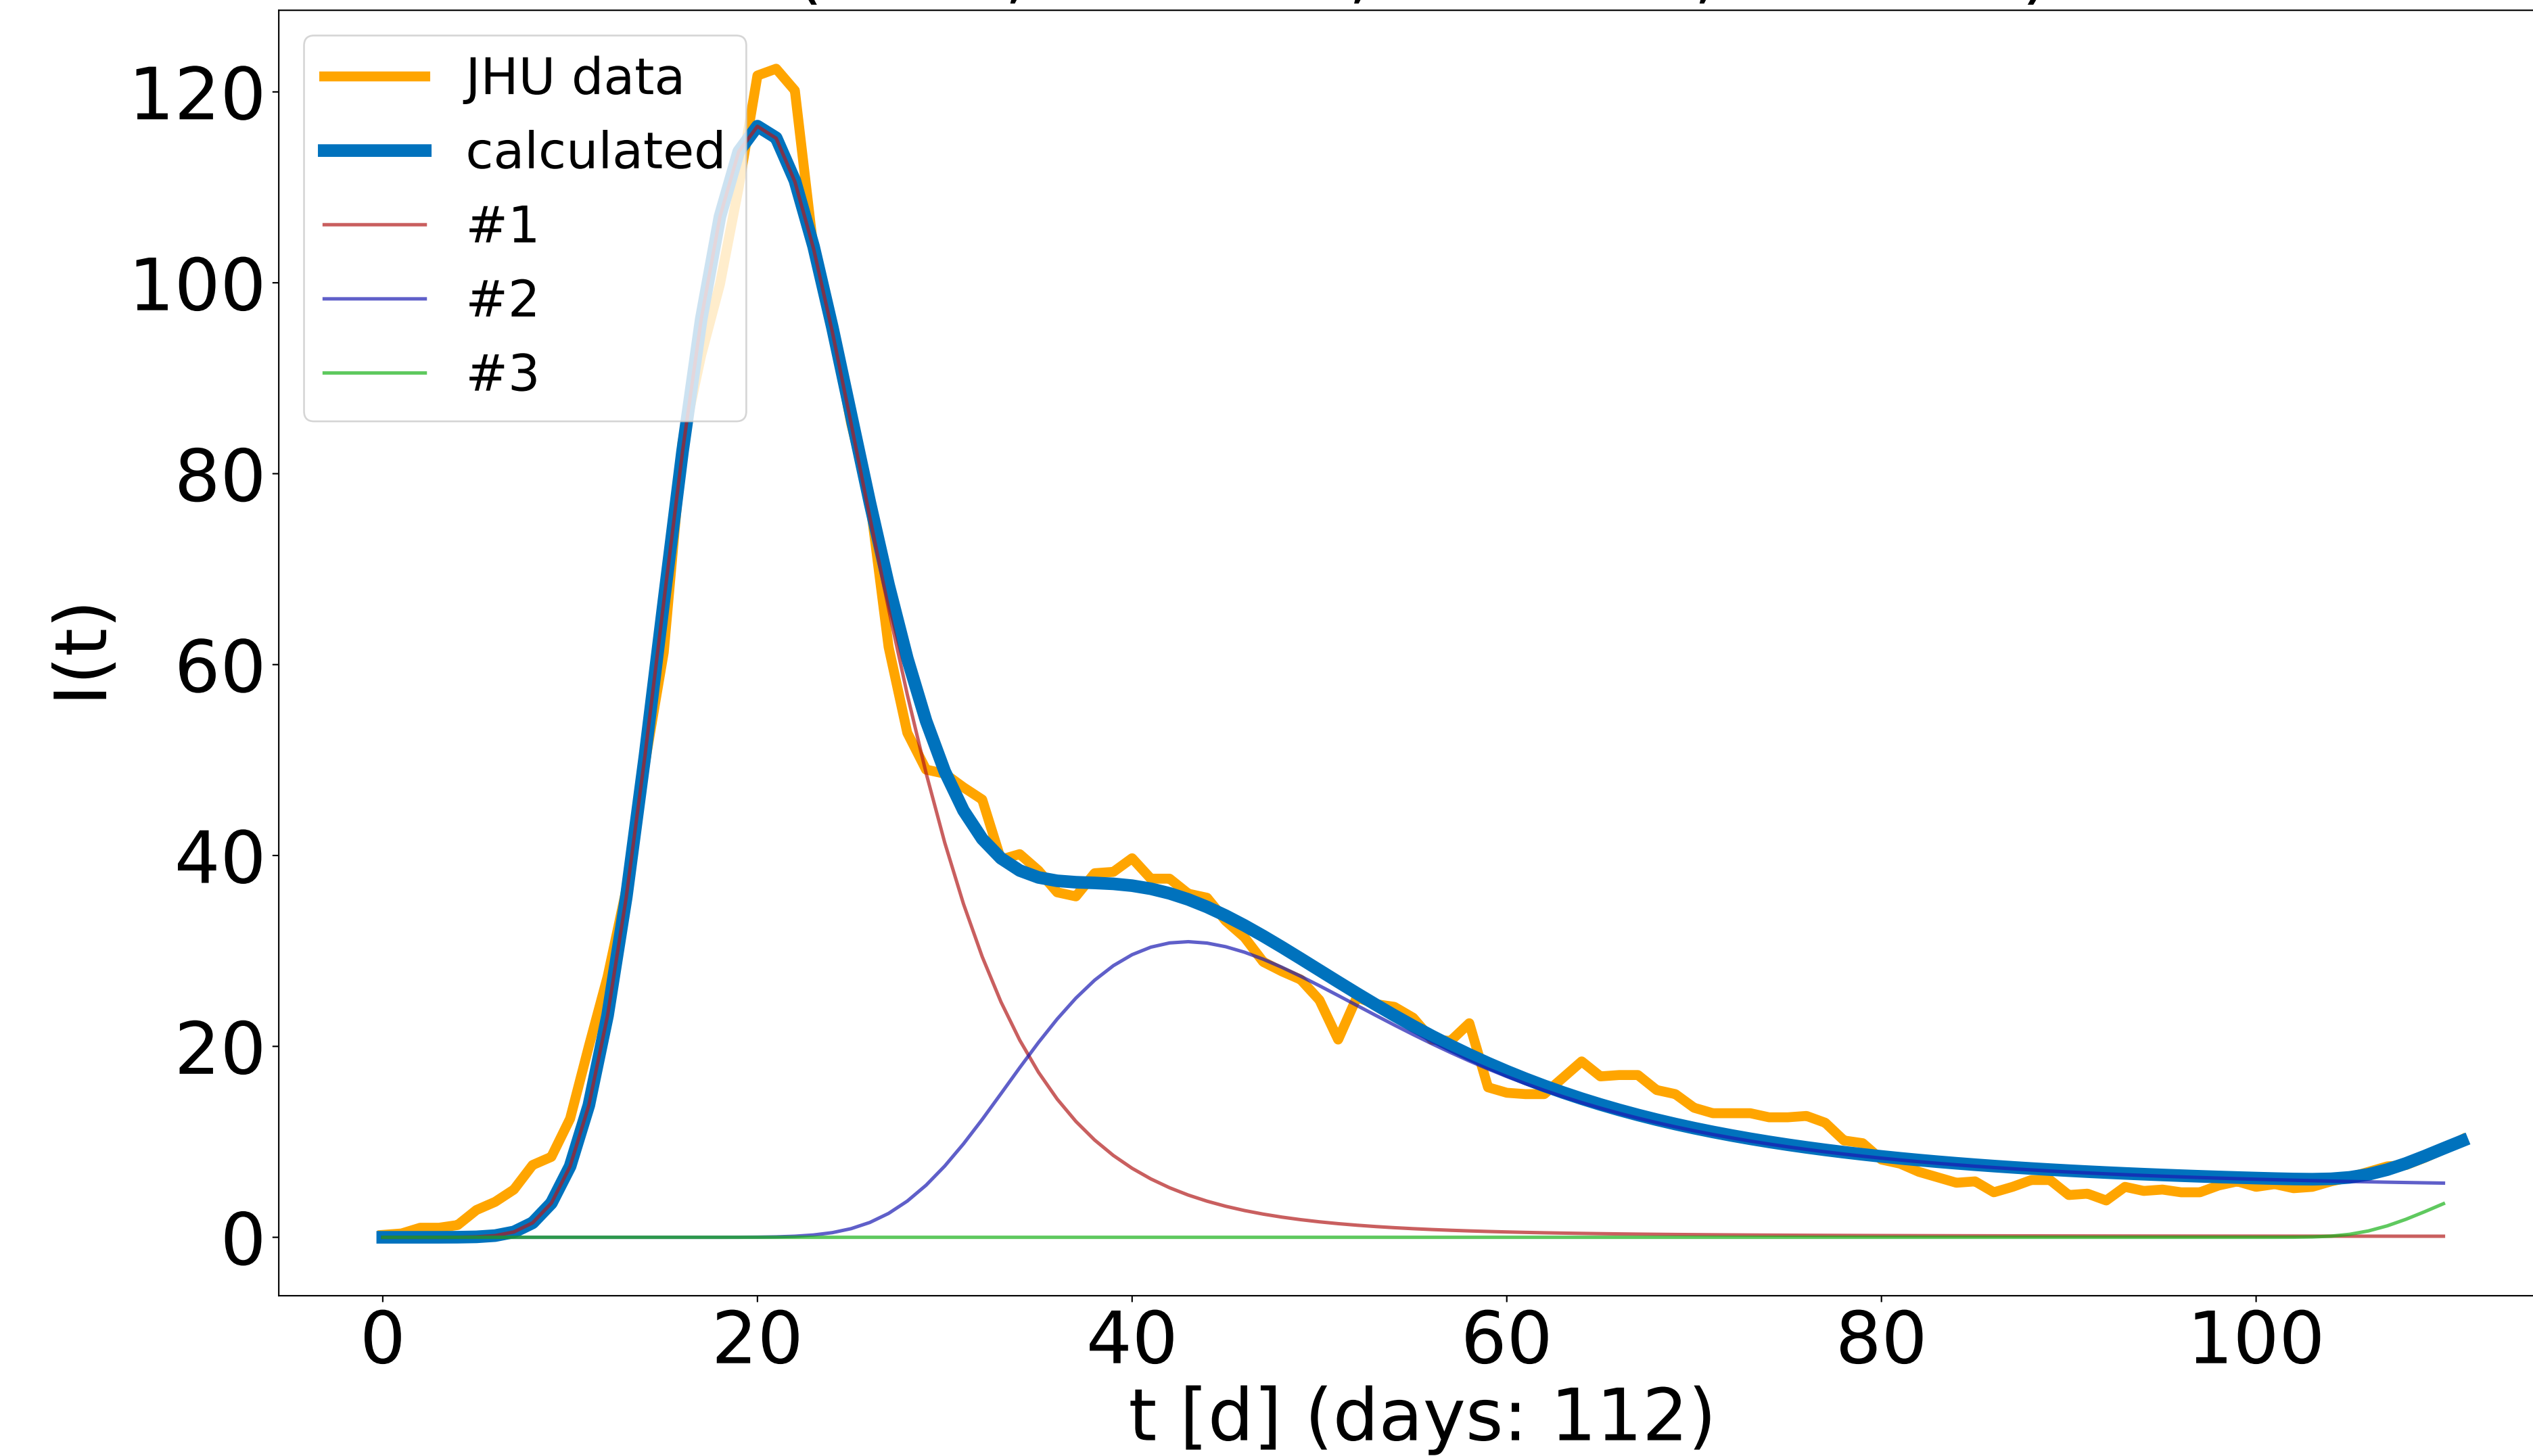

Monroe, Pennsylvania, US, Monroe ( $R^2 = 0.834$ )

(i: 4.4, a: 0.69, b: 0.099, t: 14.2)

(i: 2.0, a: 1.123, b: 1.265, t: 130.4)

(i: 0.1, a: 0.285, b: 1.361, t: 139.9)

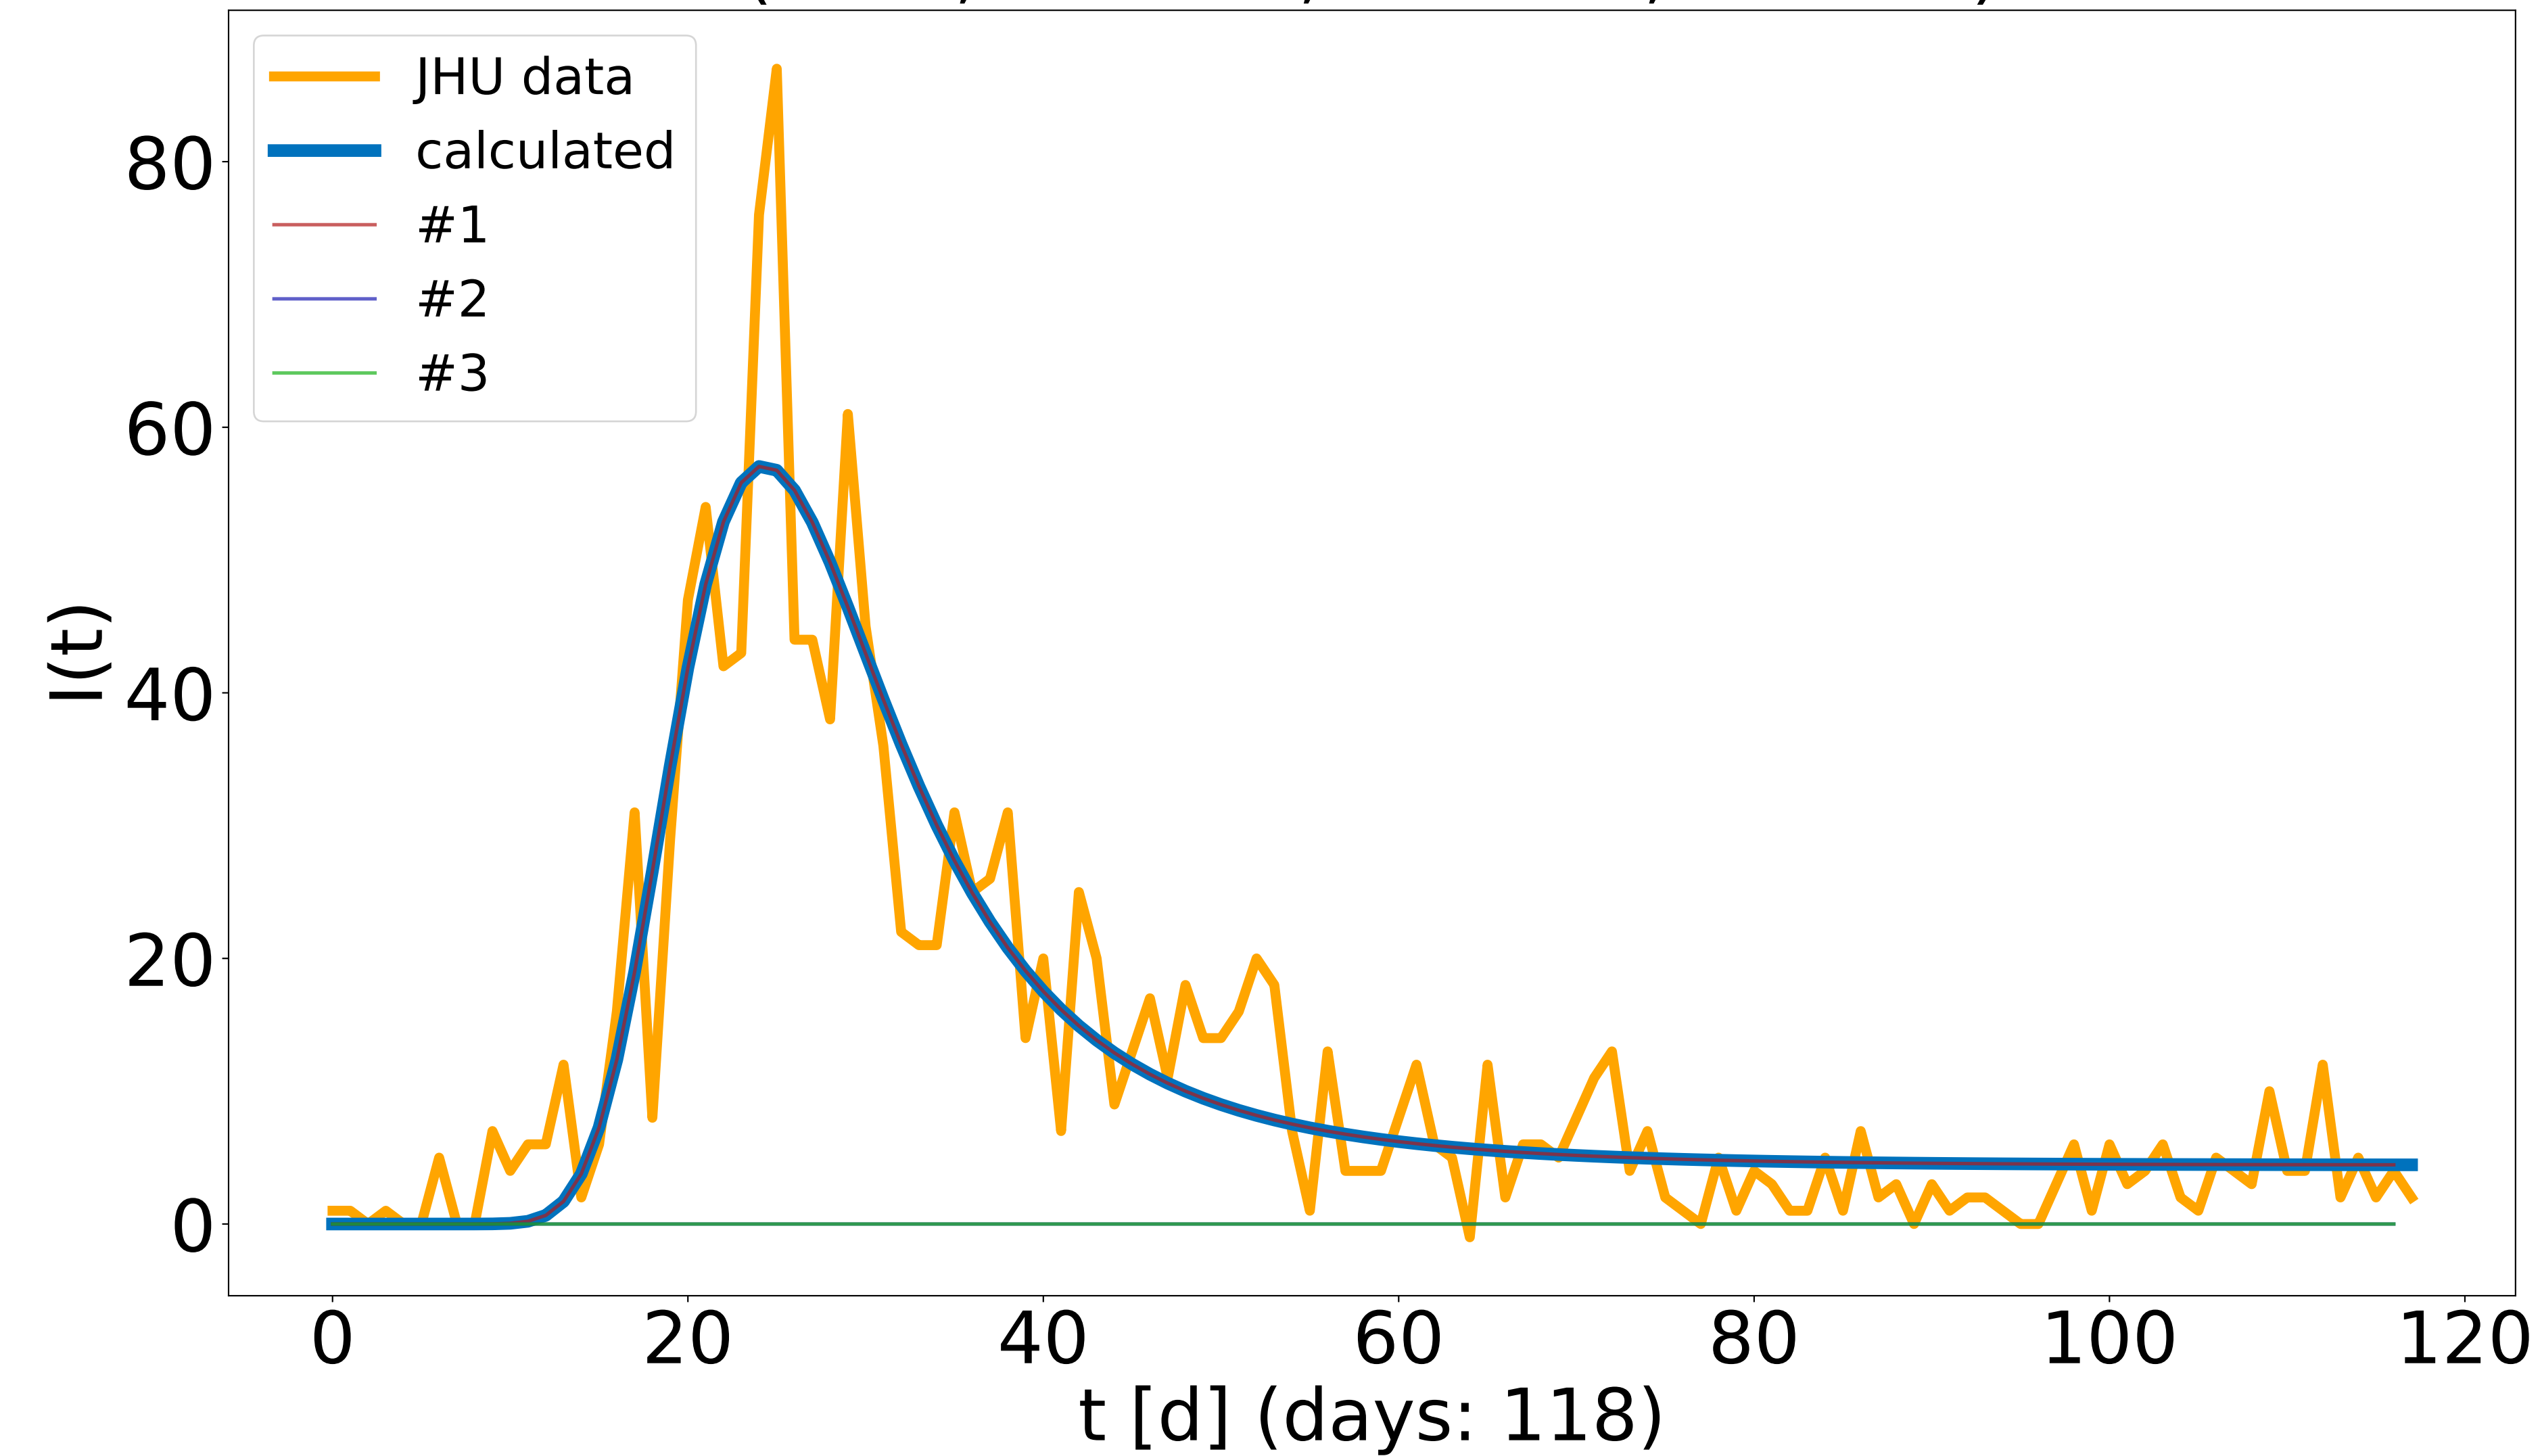

Monroe, Pennsylvania, US, Monroe ( $R^2 = 0.989$ )

(i: 0.6, a: 0.321, b: 0.034, t: 1.0)

(i: 0.1, a: 1.479, b: 0.091, t: 12.9)

(i: 0.1, a: 0.645, b: 0.067, t: 94.8)

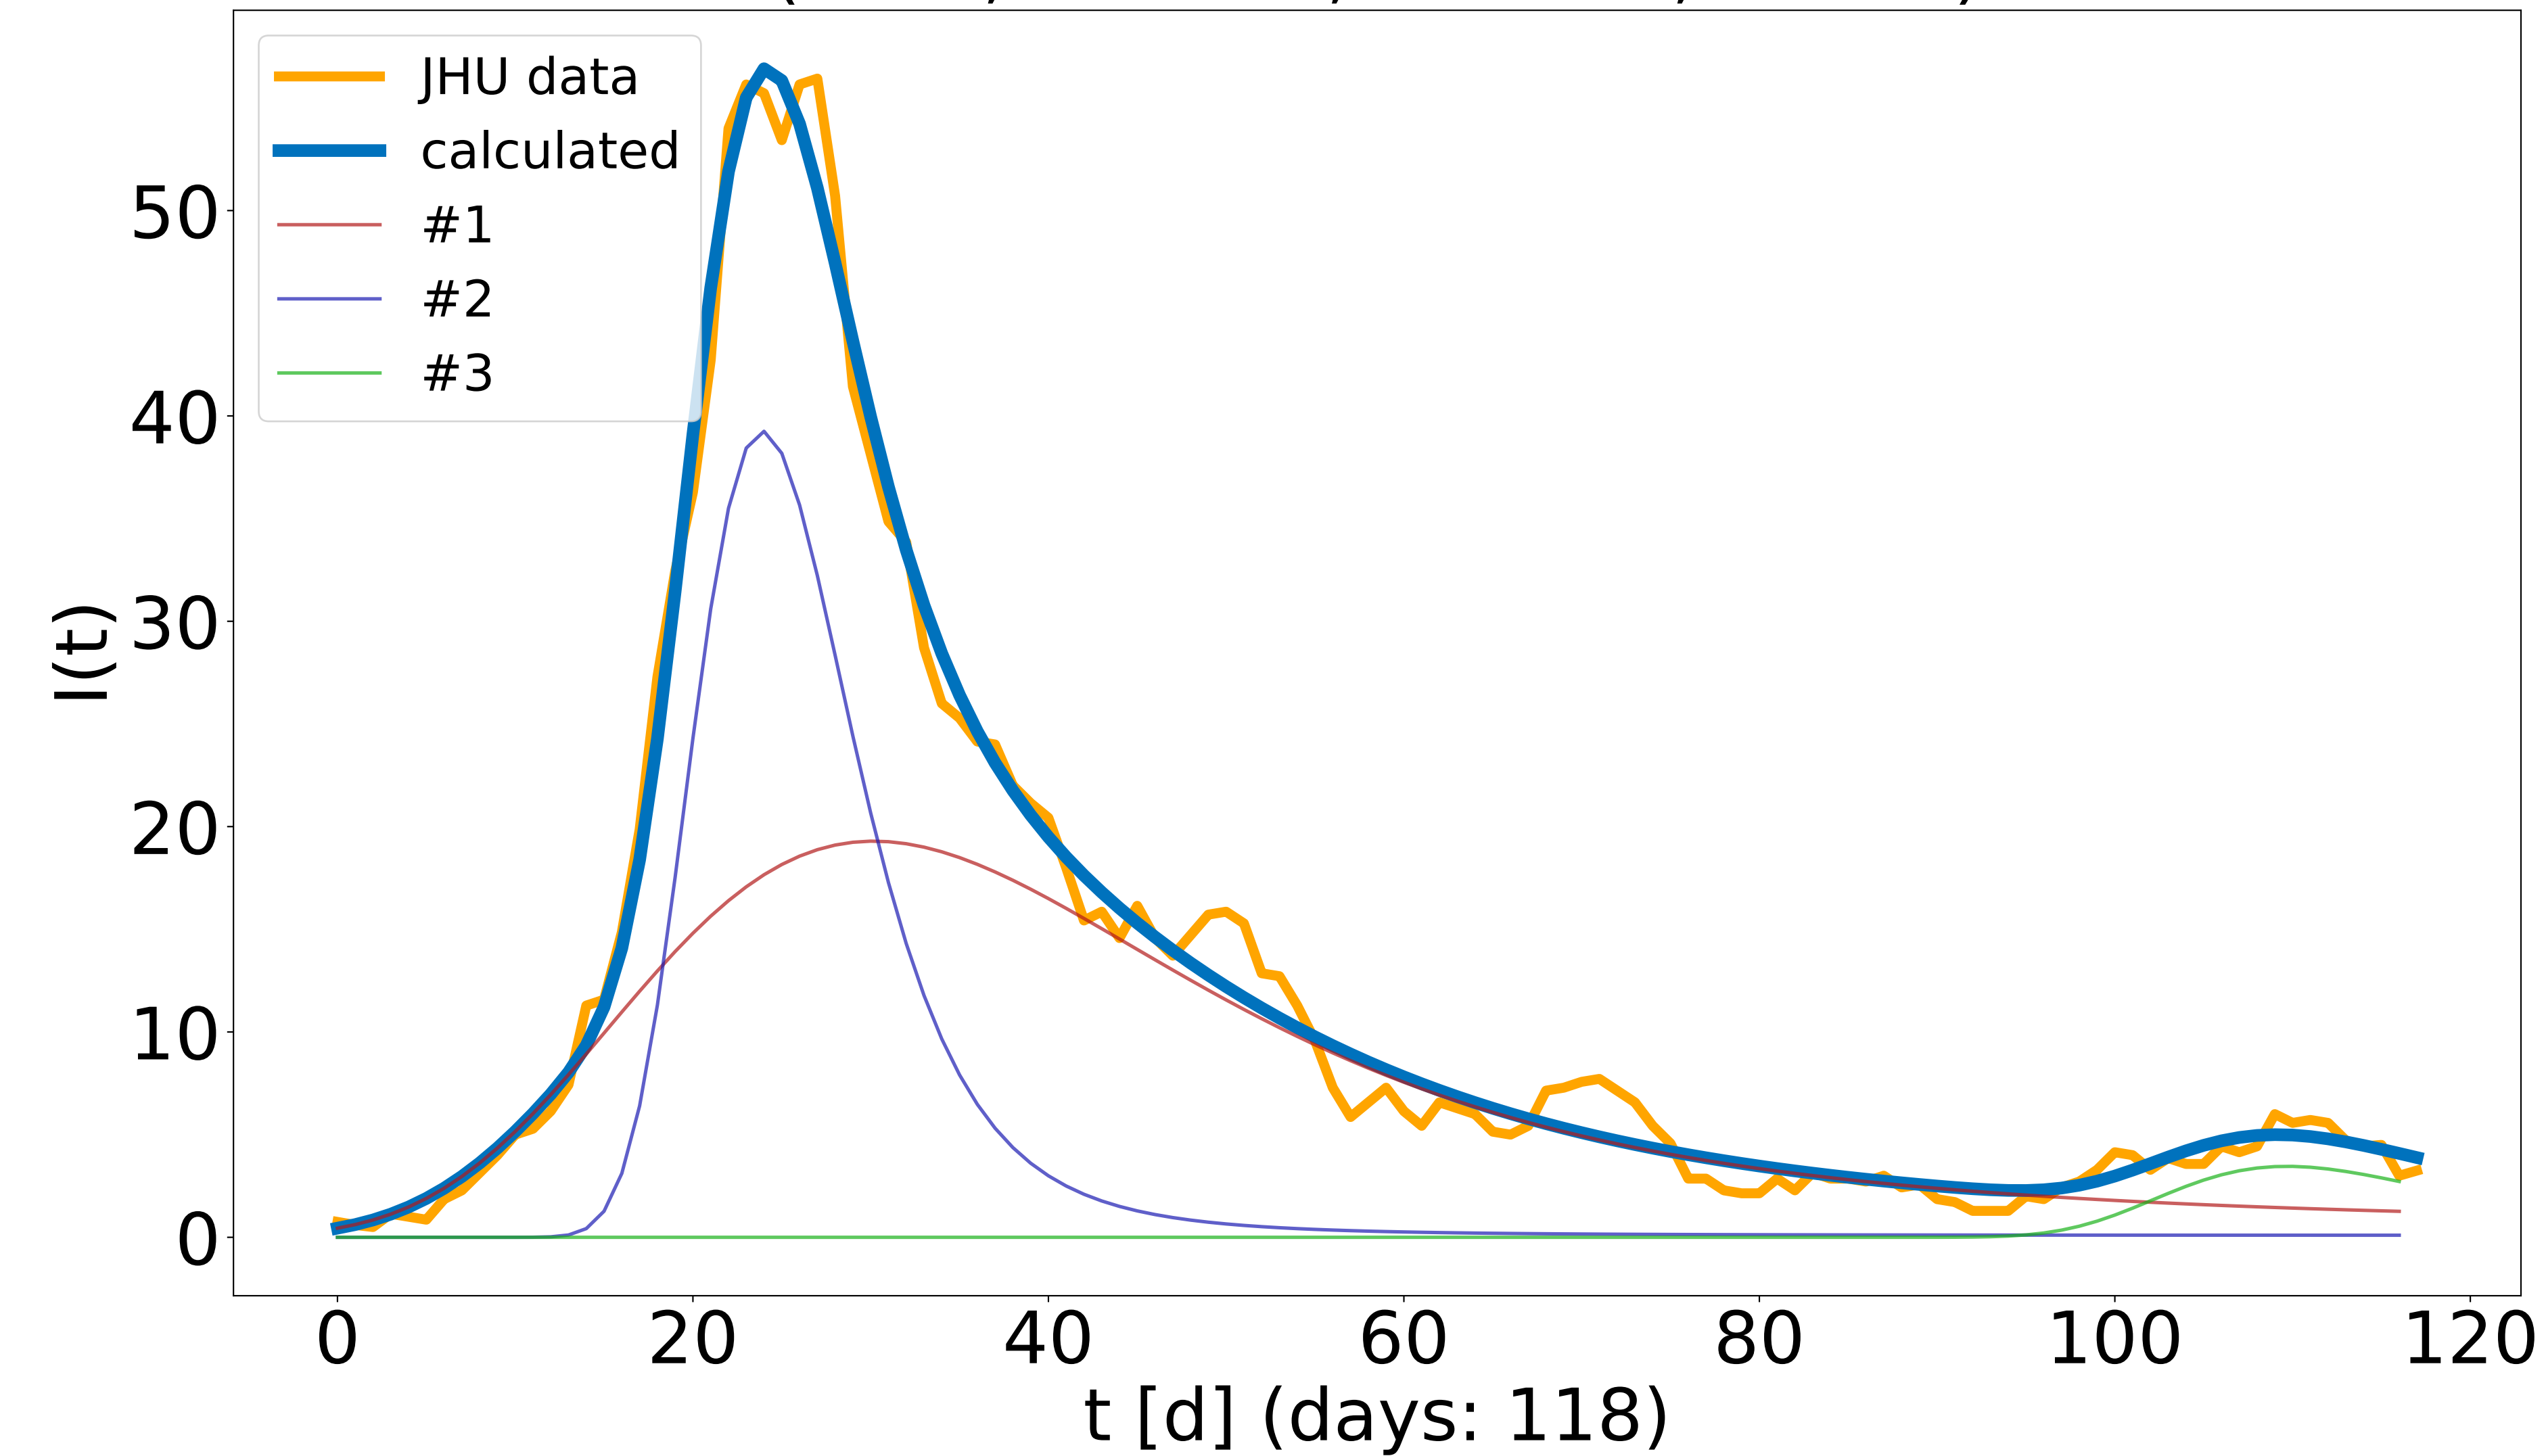

Northampton, Pennsylvania, US, Northampton ( $R^2 = 0.7$ )

(i: 0.6, a: 0.292, b: 0.024, t: 1.2)

(i: 0.1, a: 1.811, b: 0.104, t: 12.3)

(i: 5.7, a: 0.739, b: 1.4, t: 103.0)

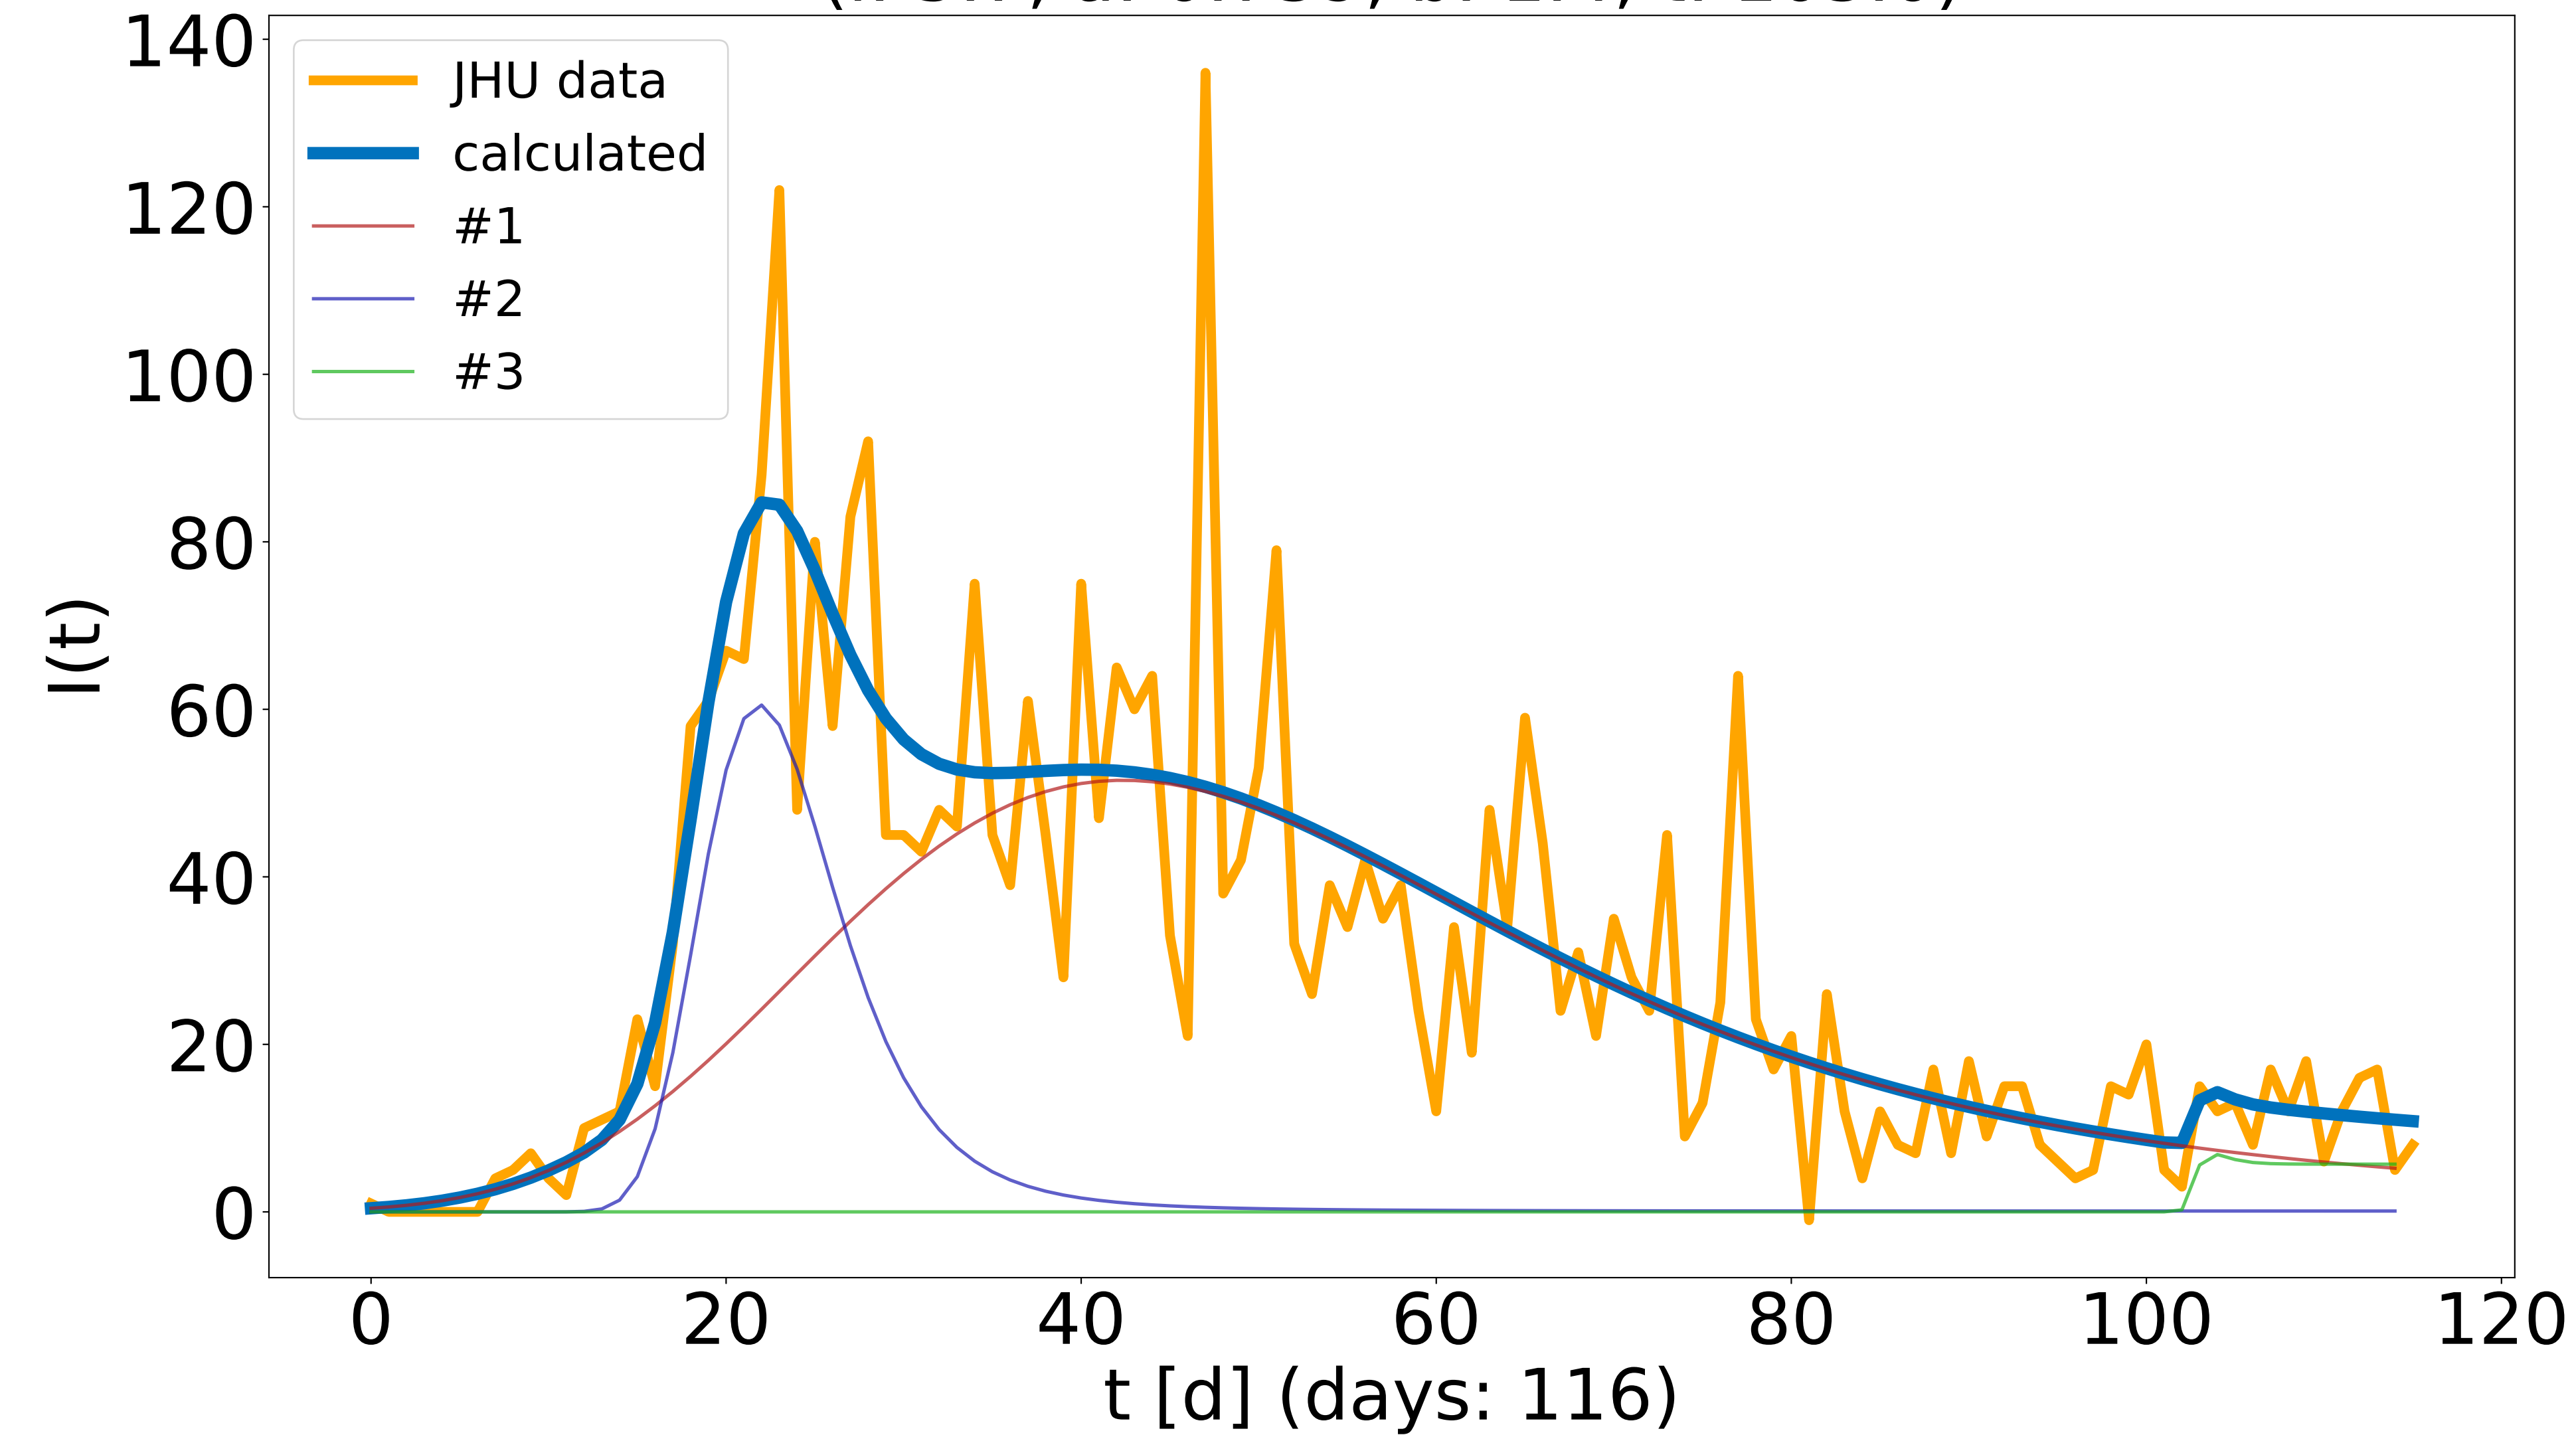

Northampton, Pennsylvania, US, Northampton ( $R^2 = 0.985$ )

(i: 0.1, a: 1.071, b: 0.059, t: 6.7)

(i: 0.1, a: 0.738, b: 0.043, t: 23.1)

(i: 9.8, a: 0.364, b: 0.154, t: 61.3)

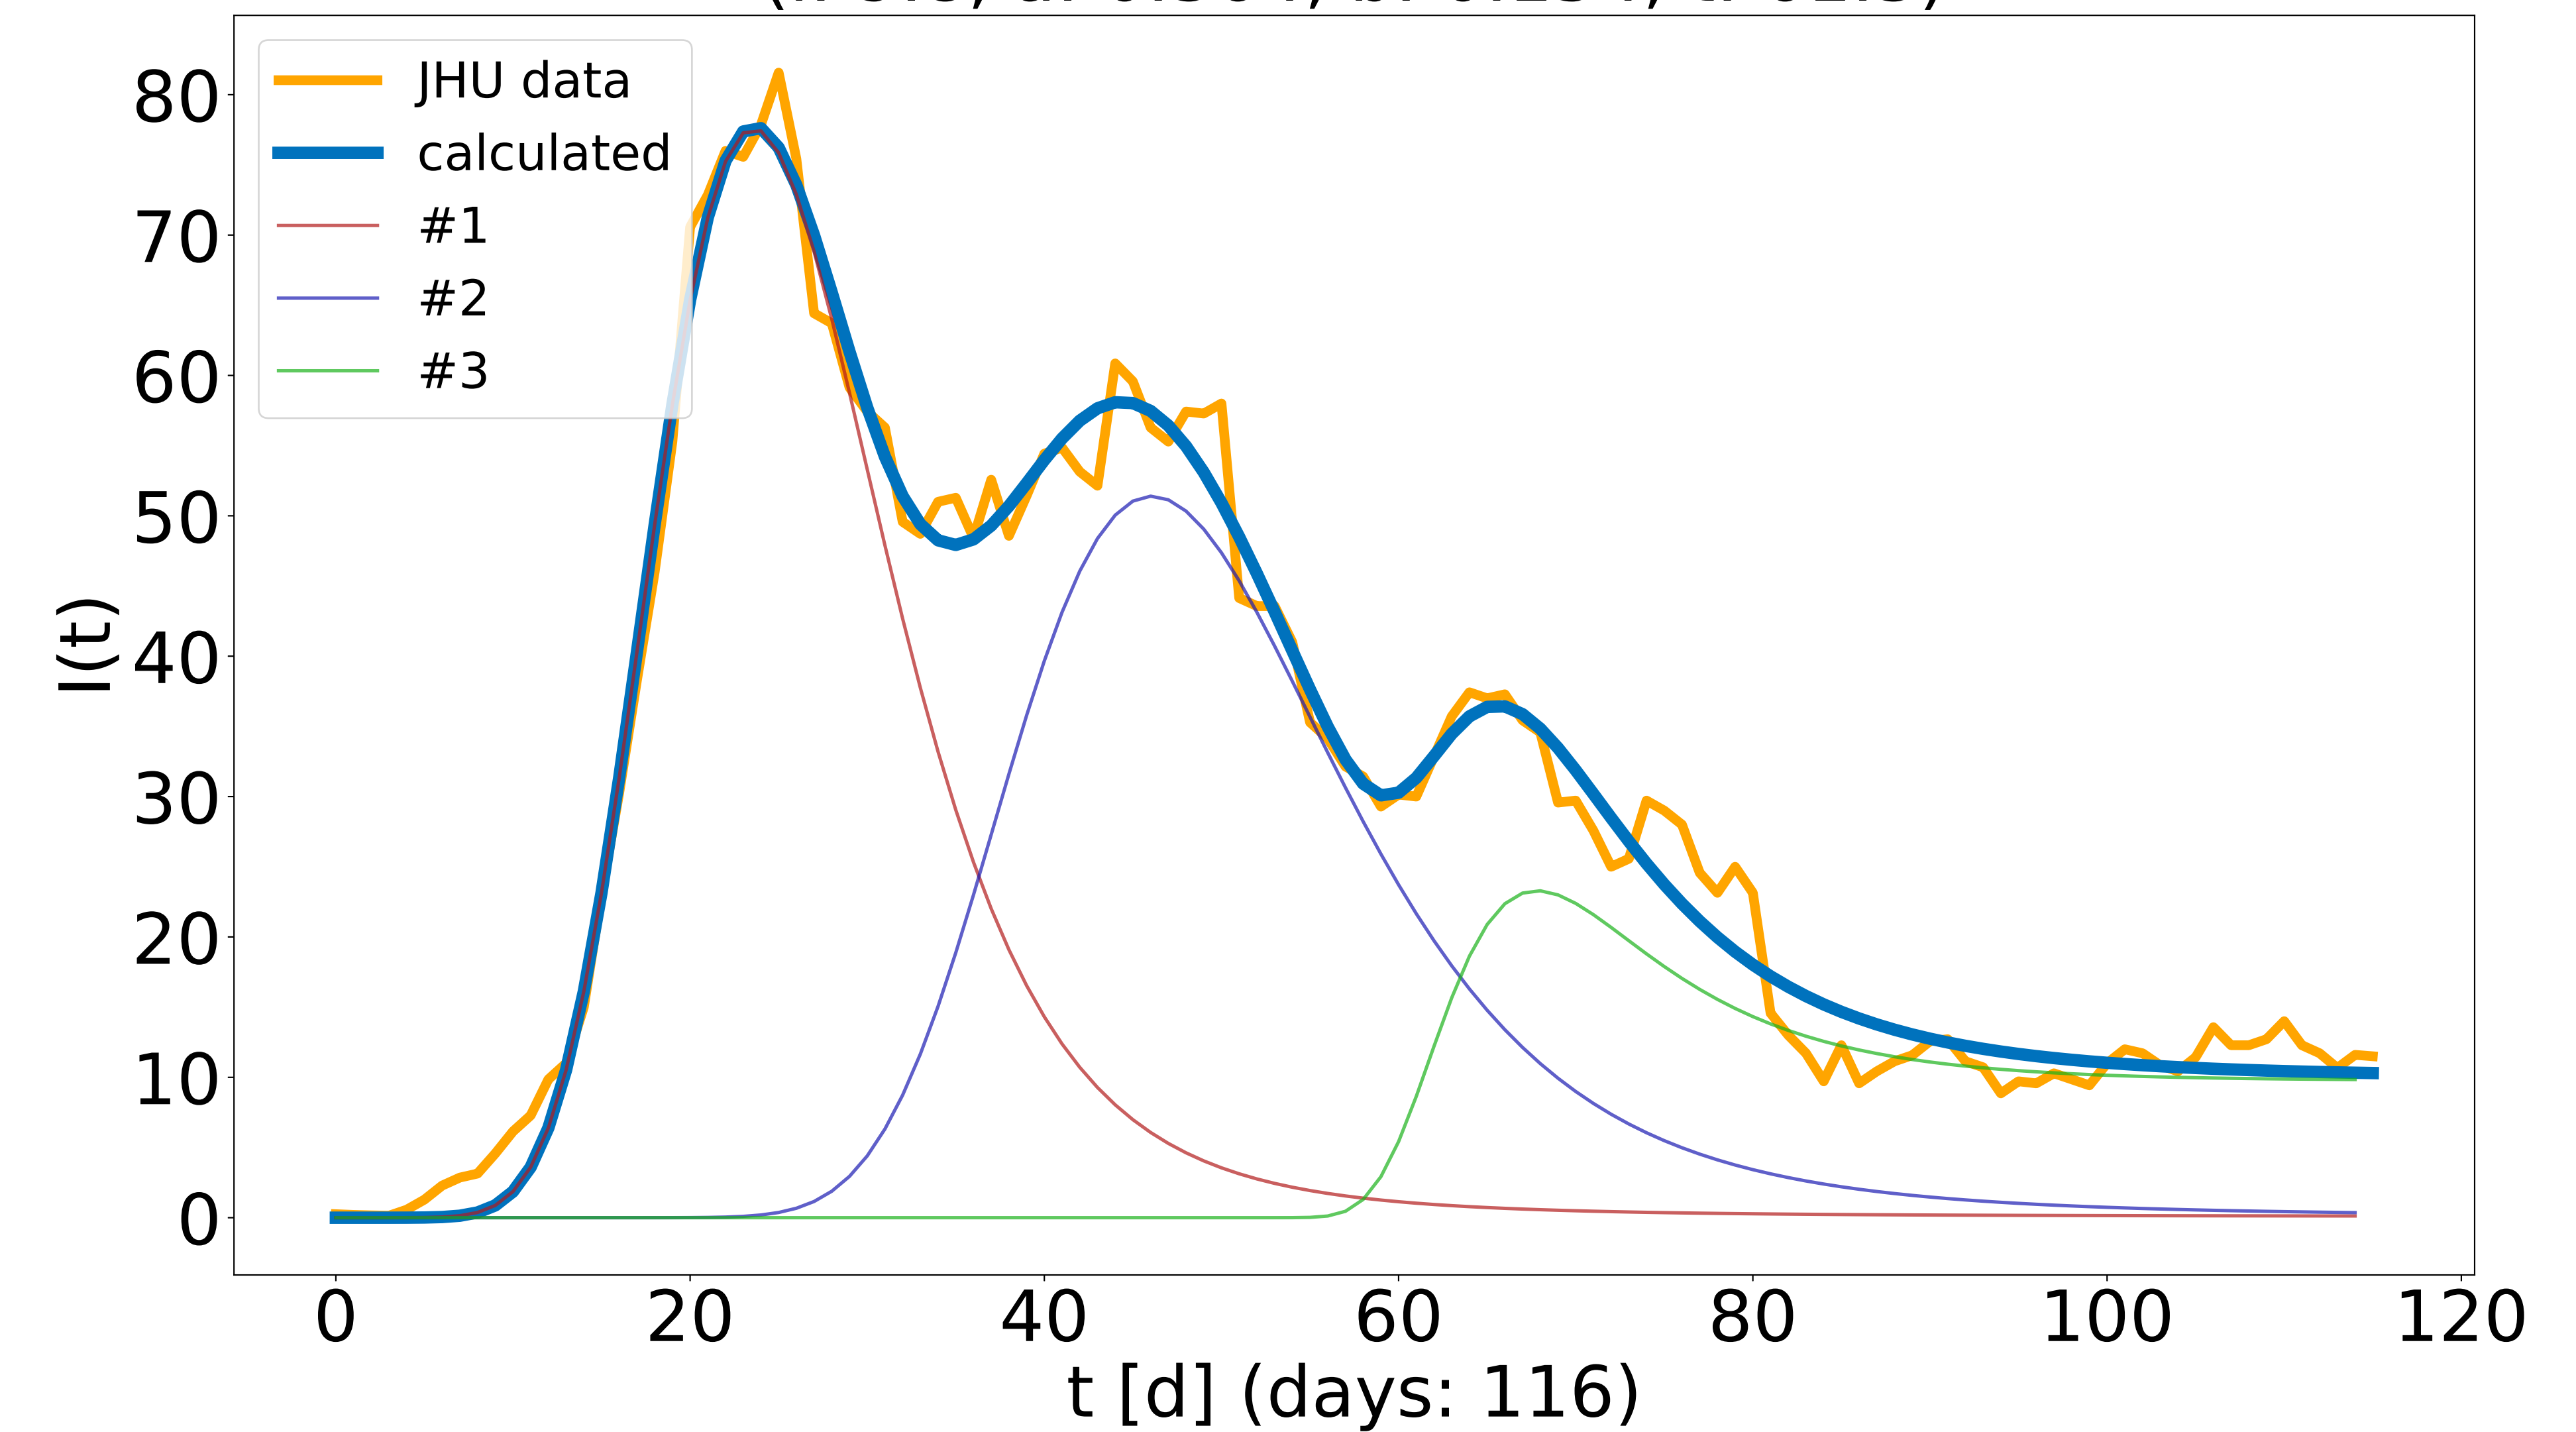



Philadelphia, Pennsylvania, US, Philadelphia ( $R^2 = 0.505$ )

(i: 6.3, a: 0.292, b: 0.025, t: 3.5)

(i: 0.3, a: 2.0, b: 0.115, t: 16.1)

(i: 63.5, a: 2.0, b: 1.057, t: 103.5)

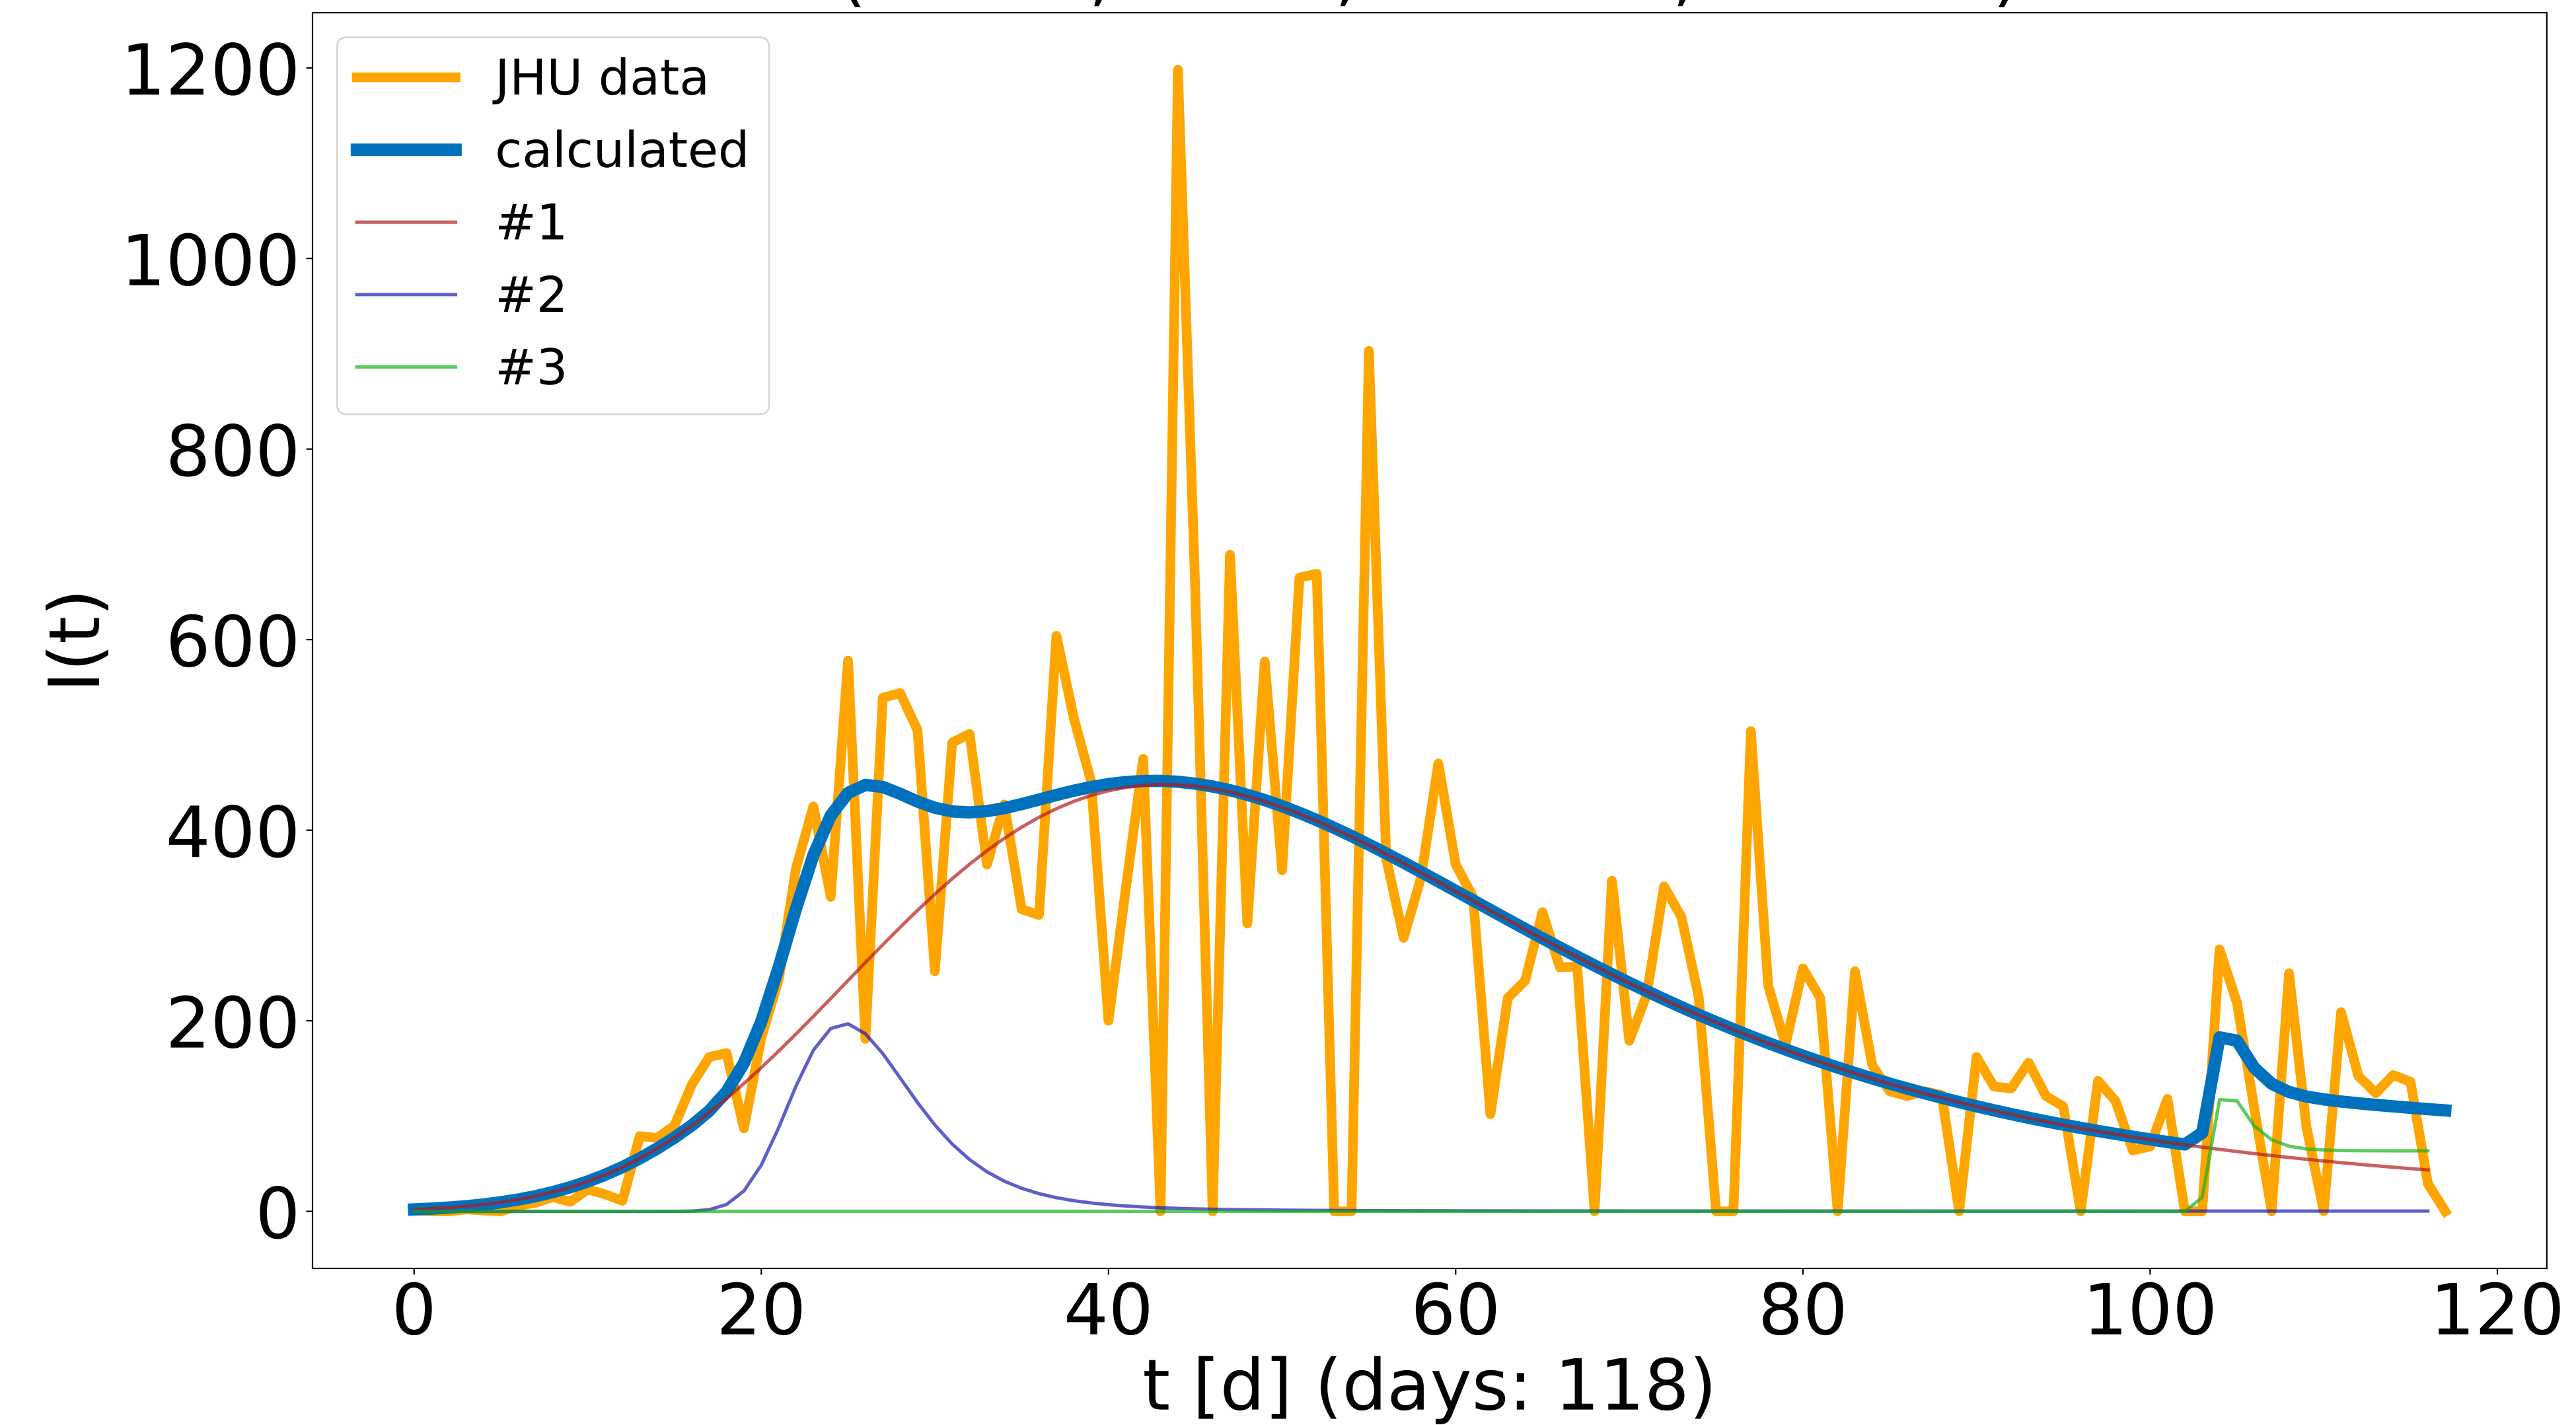

Philadelphia, Pennsylvania, US, Philadelphia ( $R^2 = 0.974$ )

(i: 0.1, a: 0.878, b: 0.039, t: 2.7)

(i: 86.1, a: 0.276, b: 0.07, t: 36.3)

(i: 0.2, a: 2.0, b: 0.146, t: 100.9)

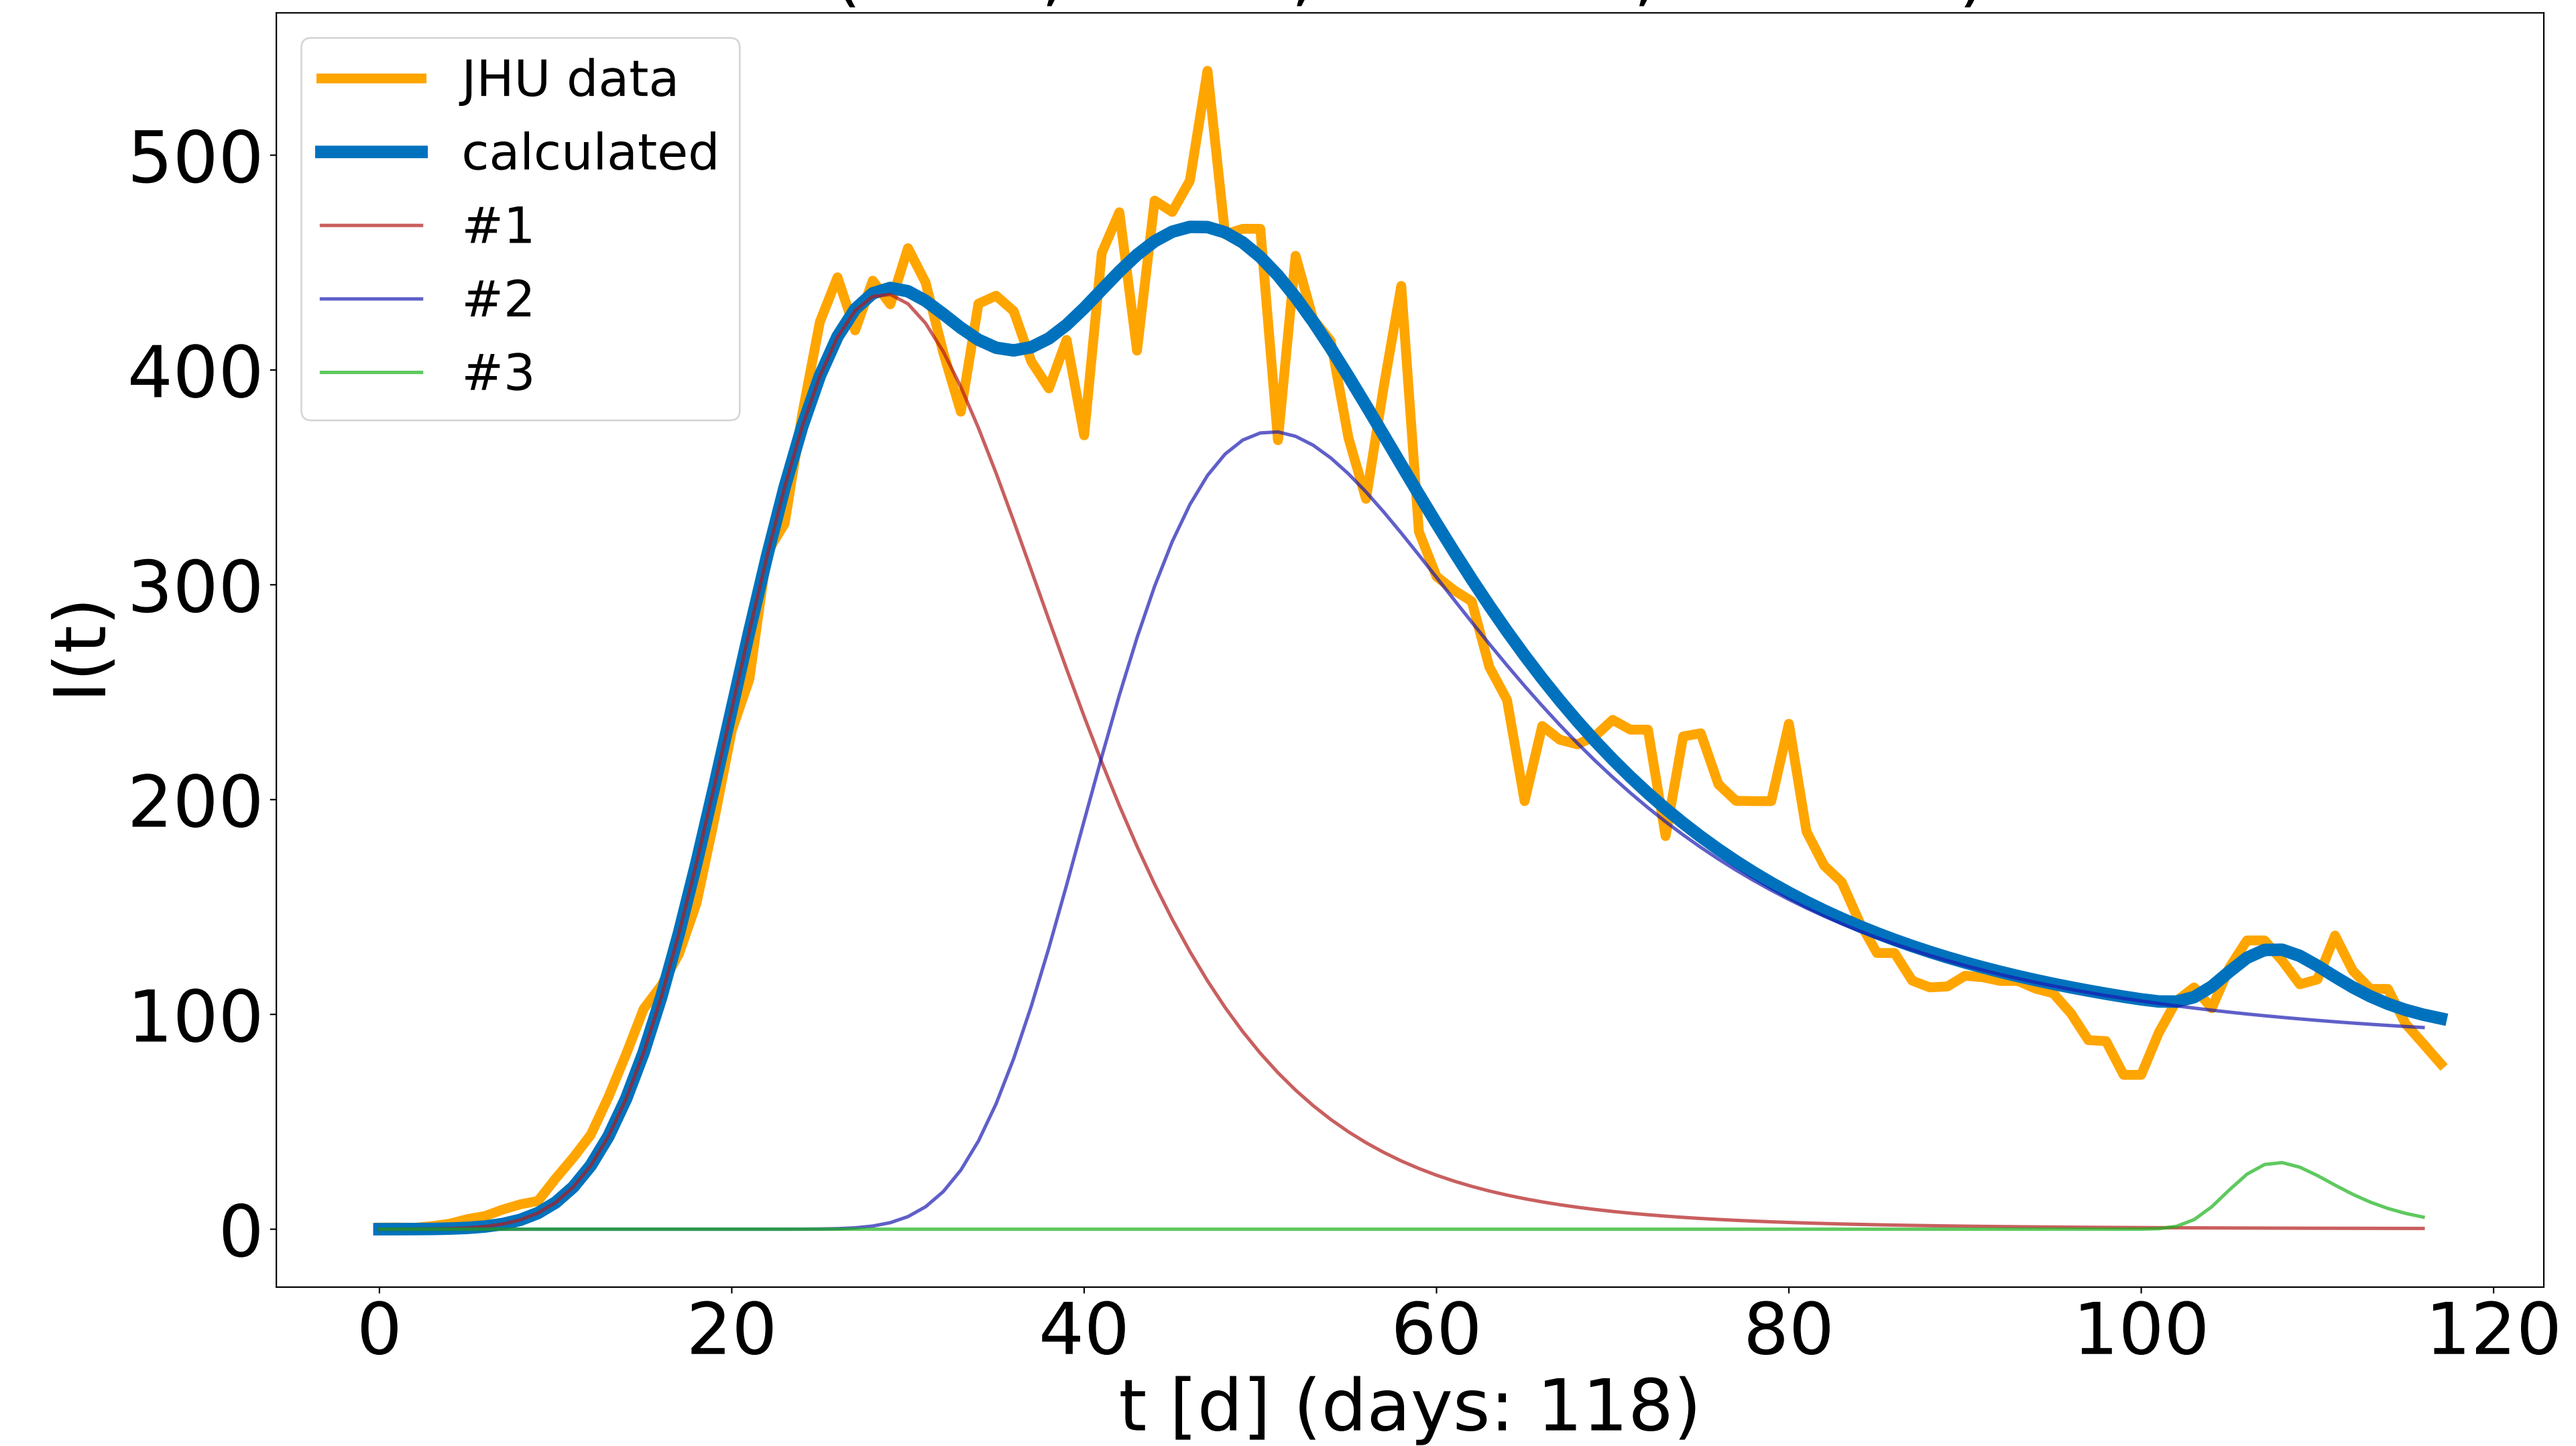



Lexington, South Carolina, US, Lexington ( $R^2 = 0.677$ )

(i: 3.1, a: 0.383, b: 0.095, t: 13.2)

(i: 4.7, a: 2.0, b: 0.653, t: 47.5)

(i: 46.8, a: 0.553, b: 1.4, t: 82.8)

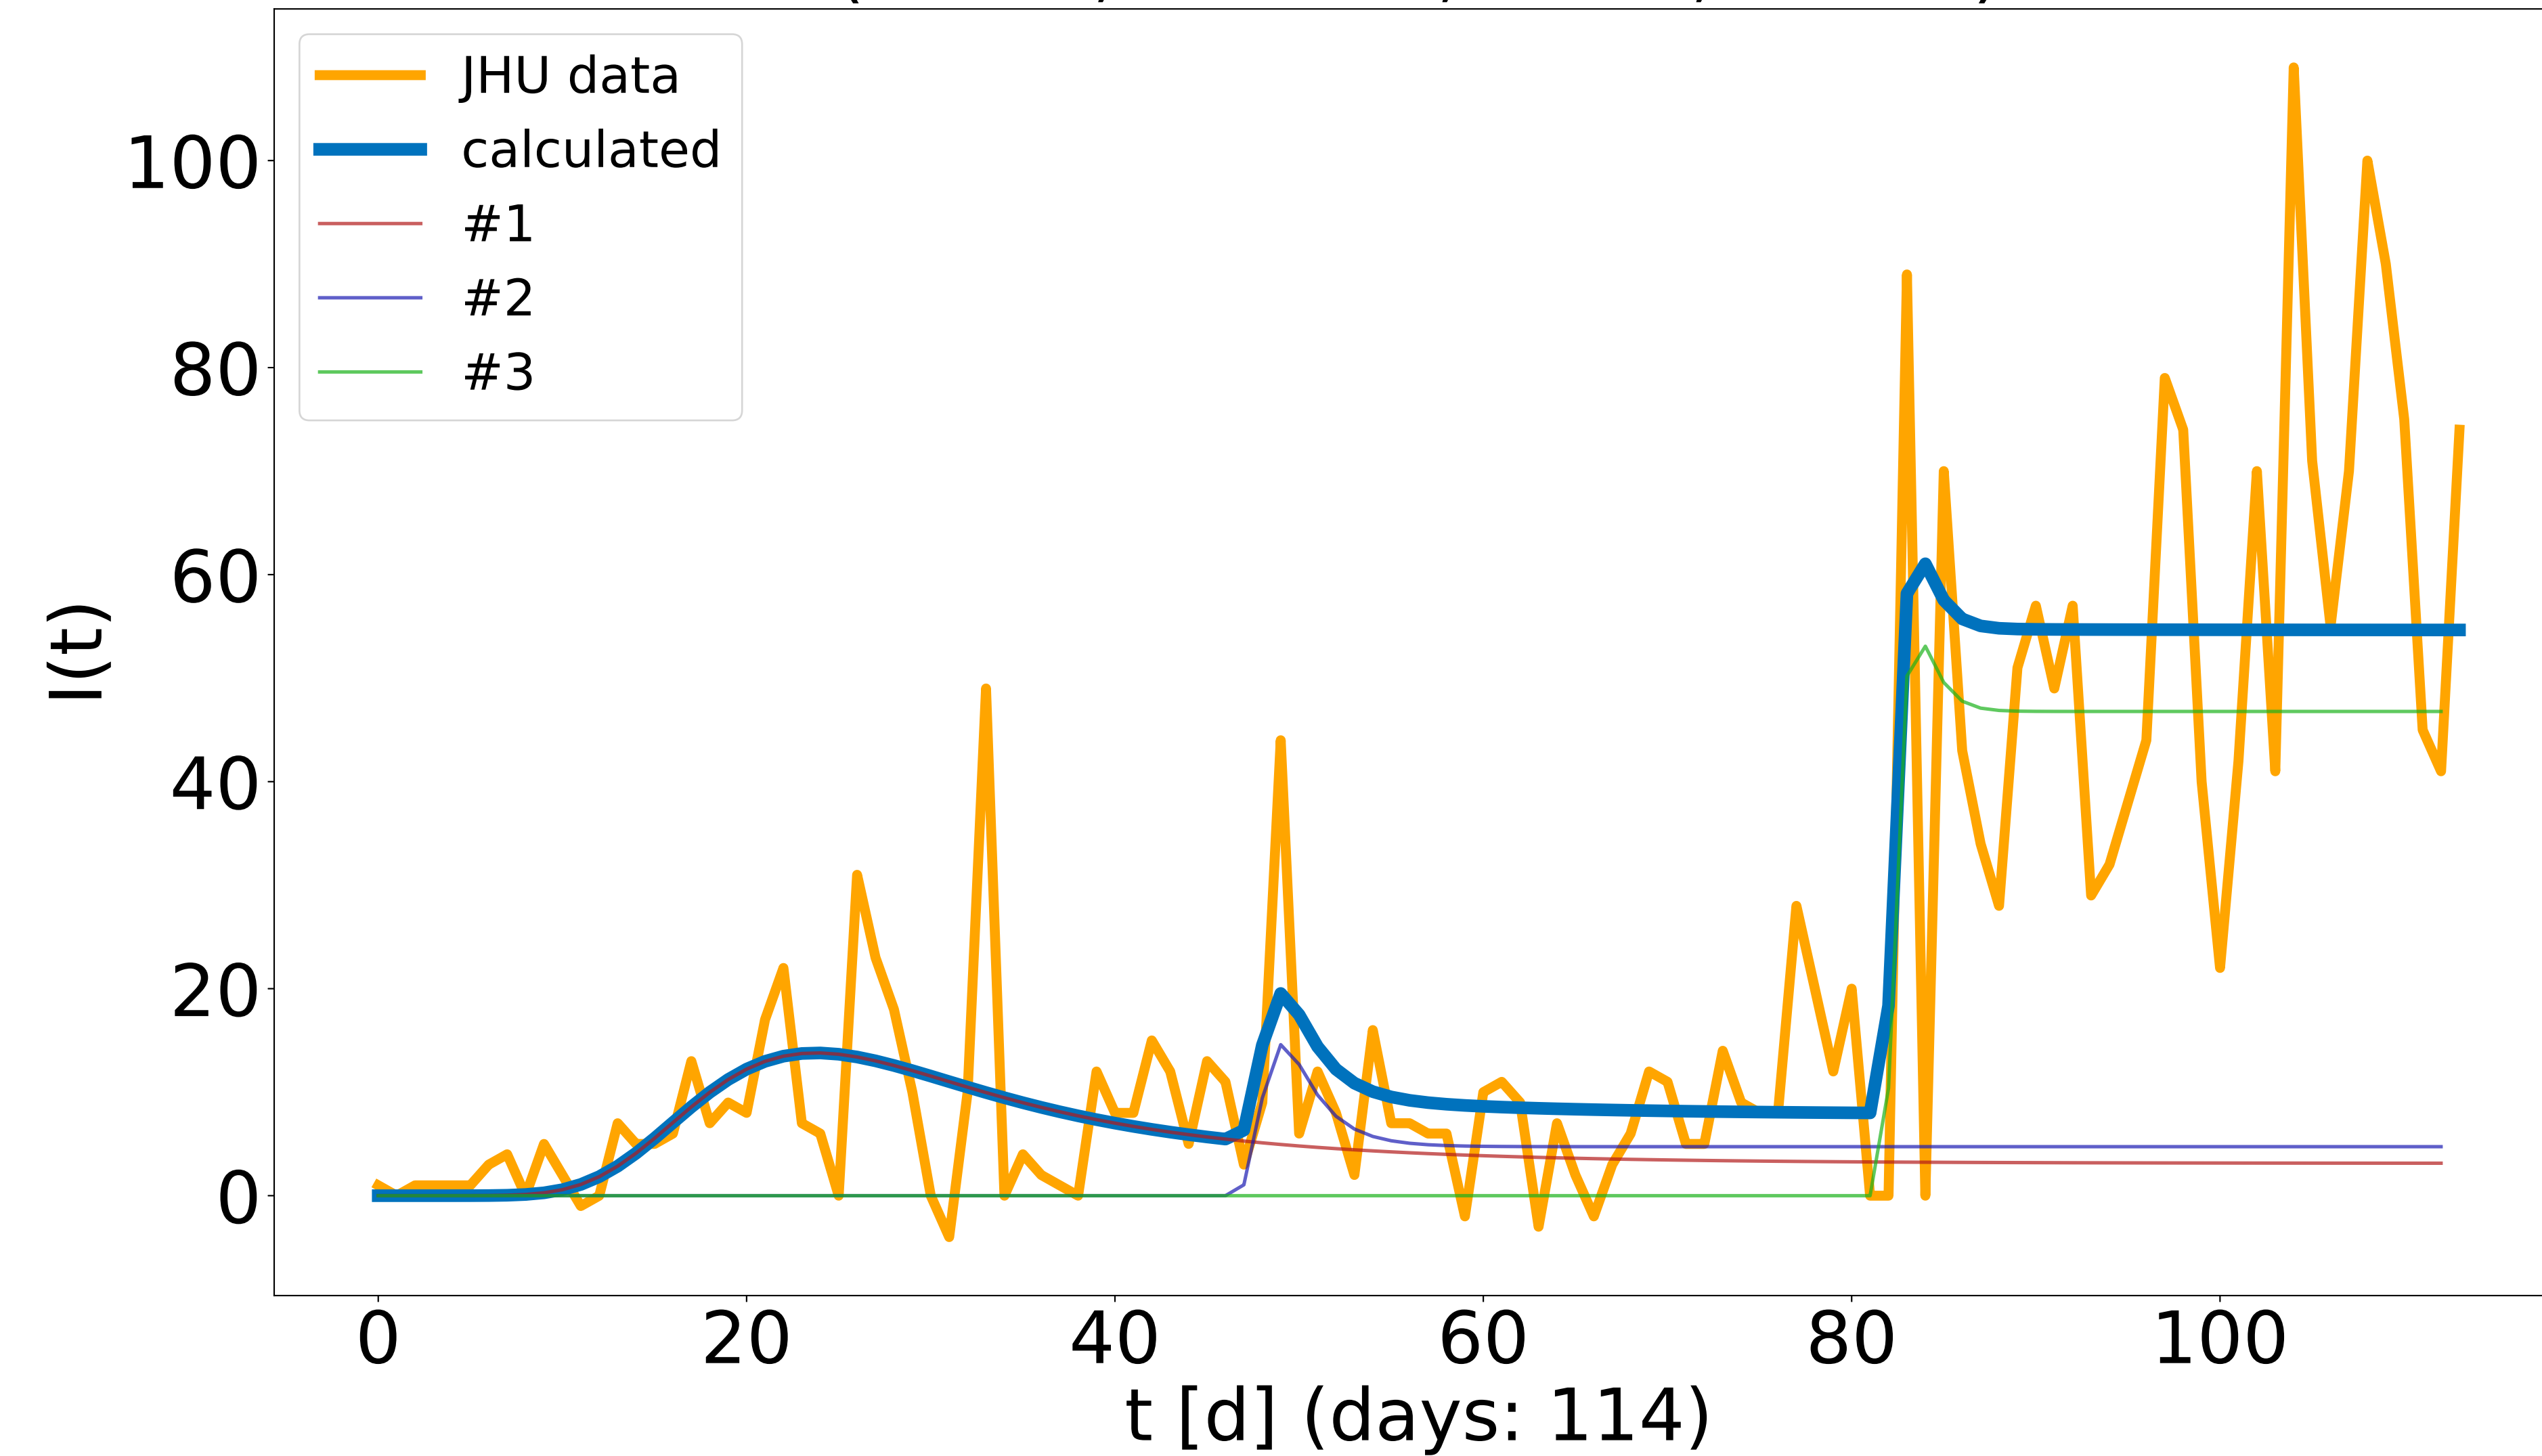

Lexington, South Carolina, US, Lexington ( $R^2 = 0.974$ )

(i: 0.1, a: 0.643, b: 0.048, t: 4.1)

(i: 0.1, a: 1.06, b: 0.084, t: 36.7)

(i: 75.6, a: 0.001, b: 0.057, t: 135.0)

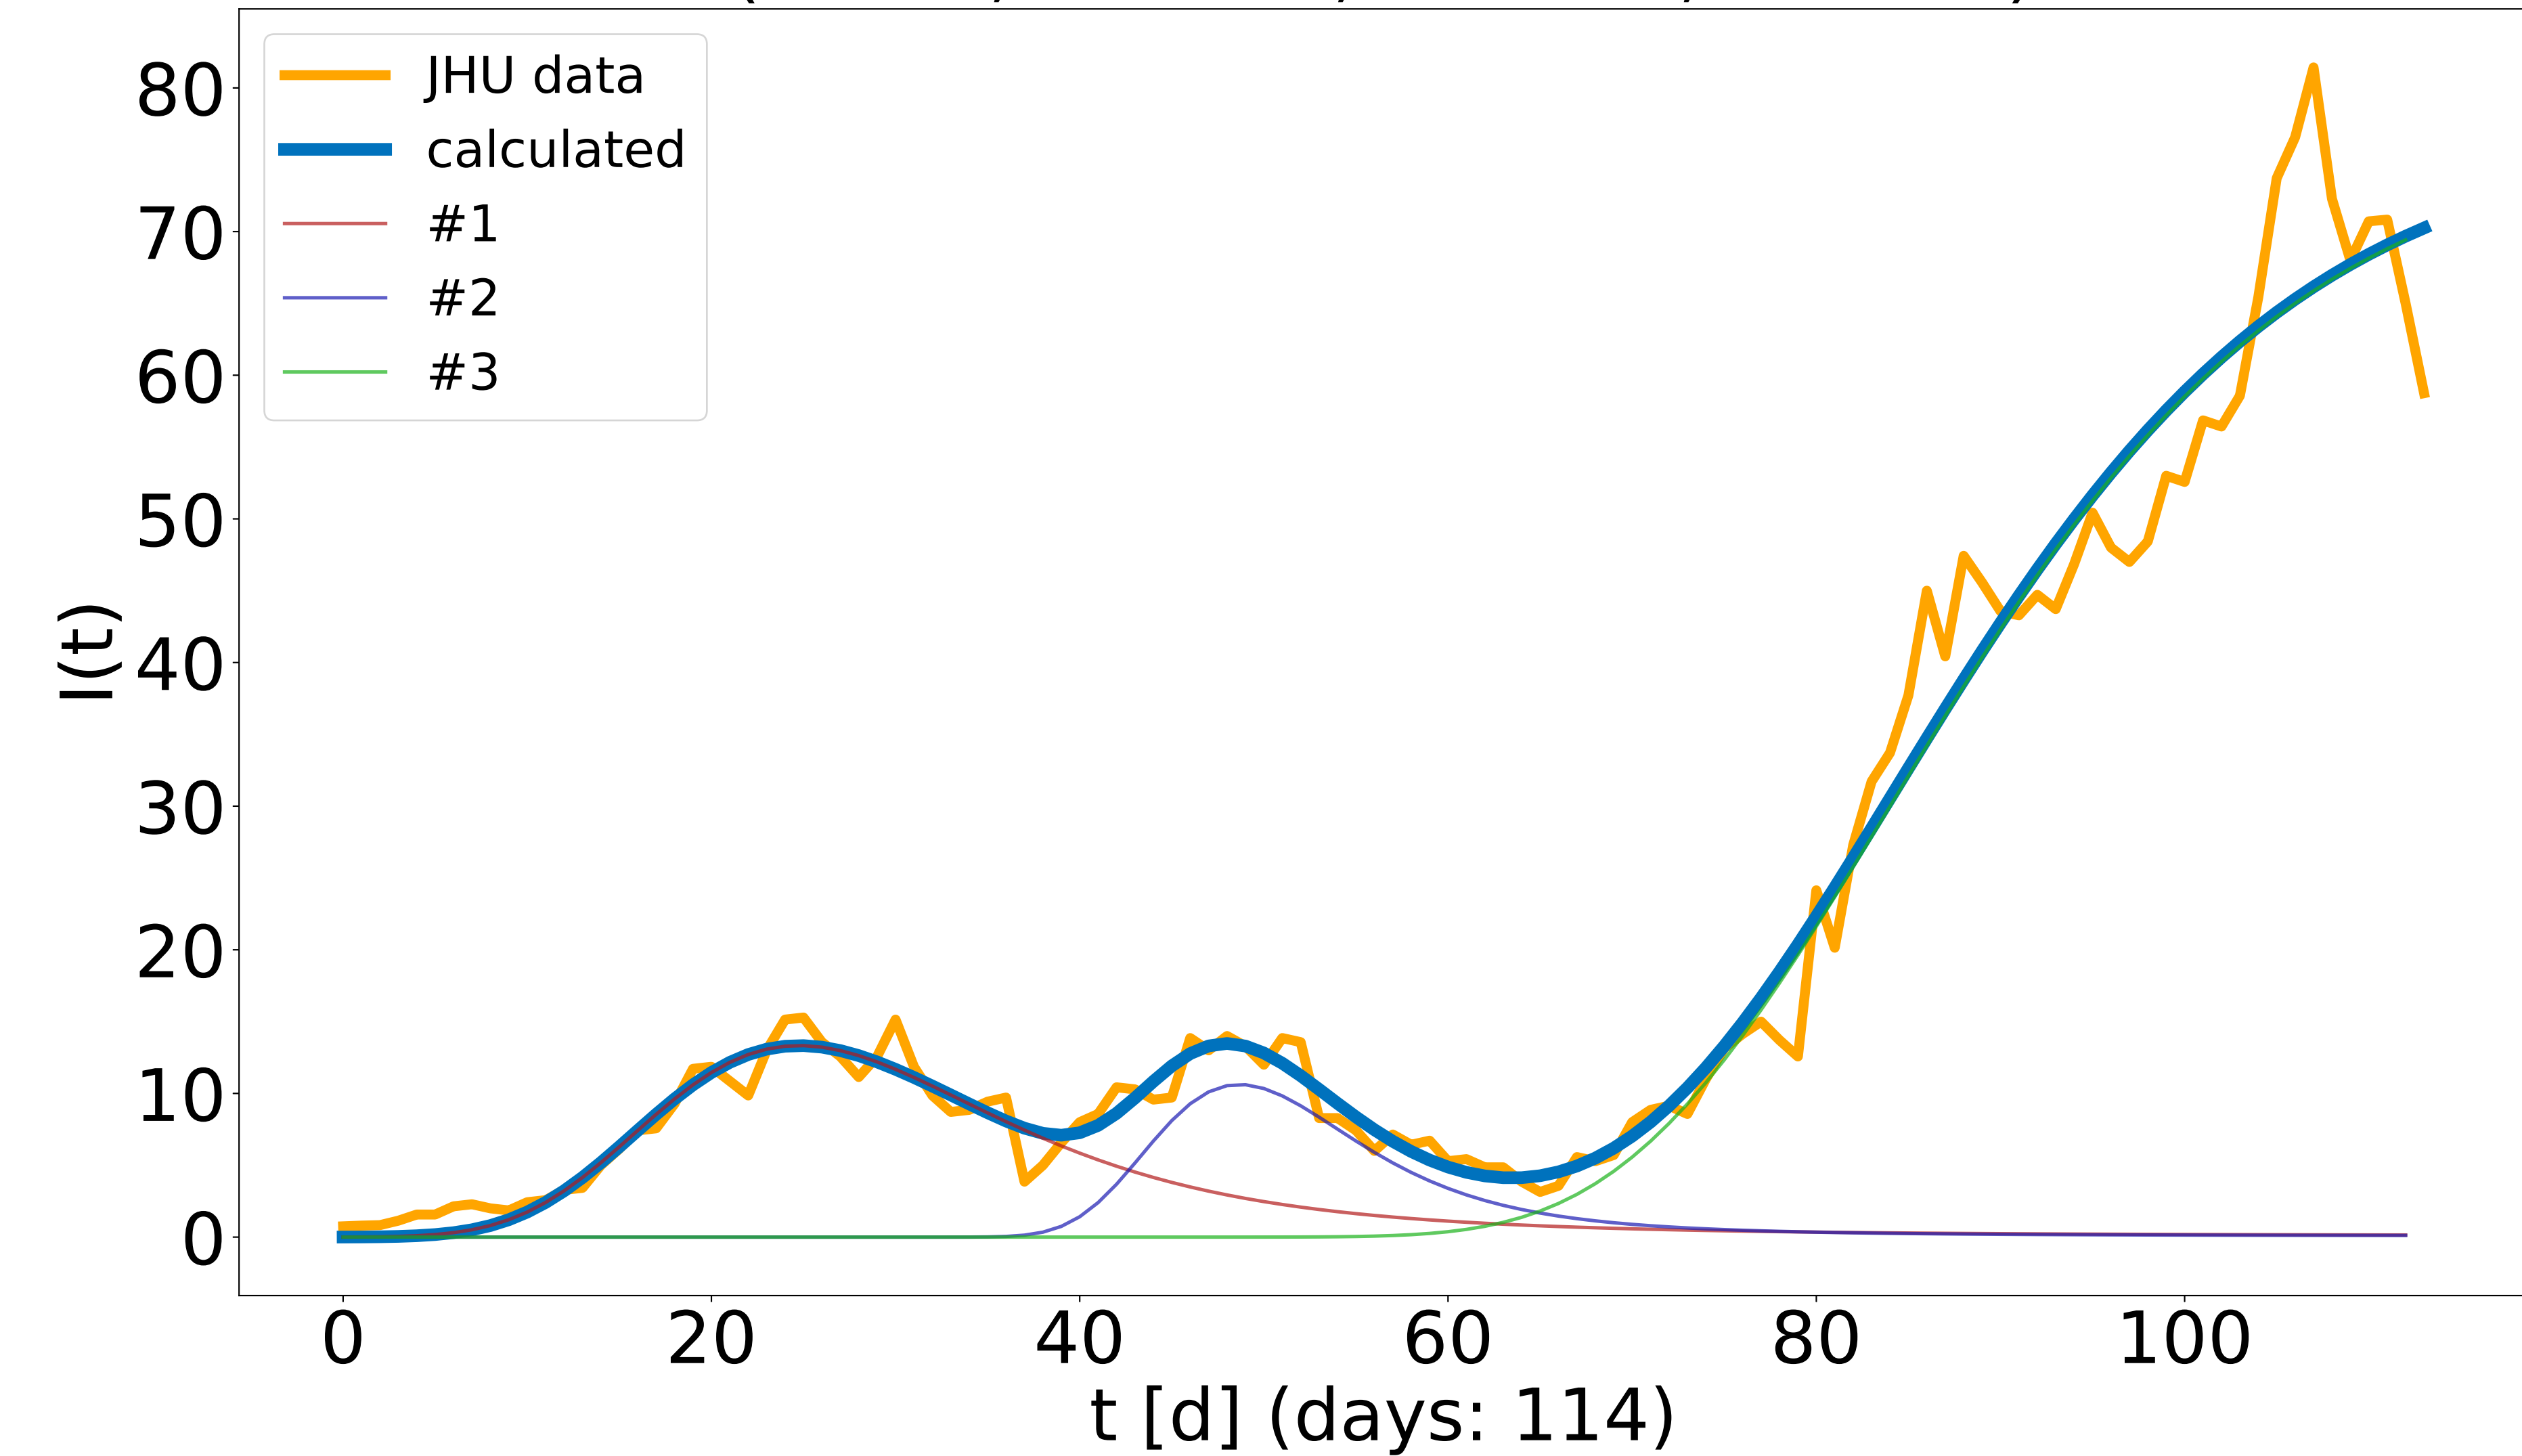

Spartanburg, South Carolina, US, Spartanburg ( $R^2 = 0.599$ )

(i: 0.1, a: 0.937, b: 0.079, t: 11.5)

(i: 4.1, a: 2.0, b: 0.65, t: 27.5)

(i: 59.1, a: 0.026, b: 0.011, t: 120.5)

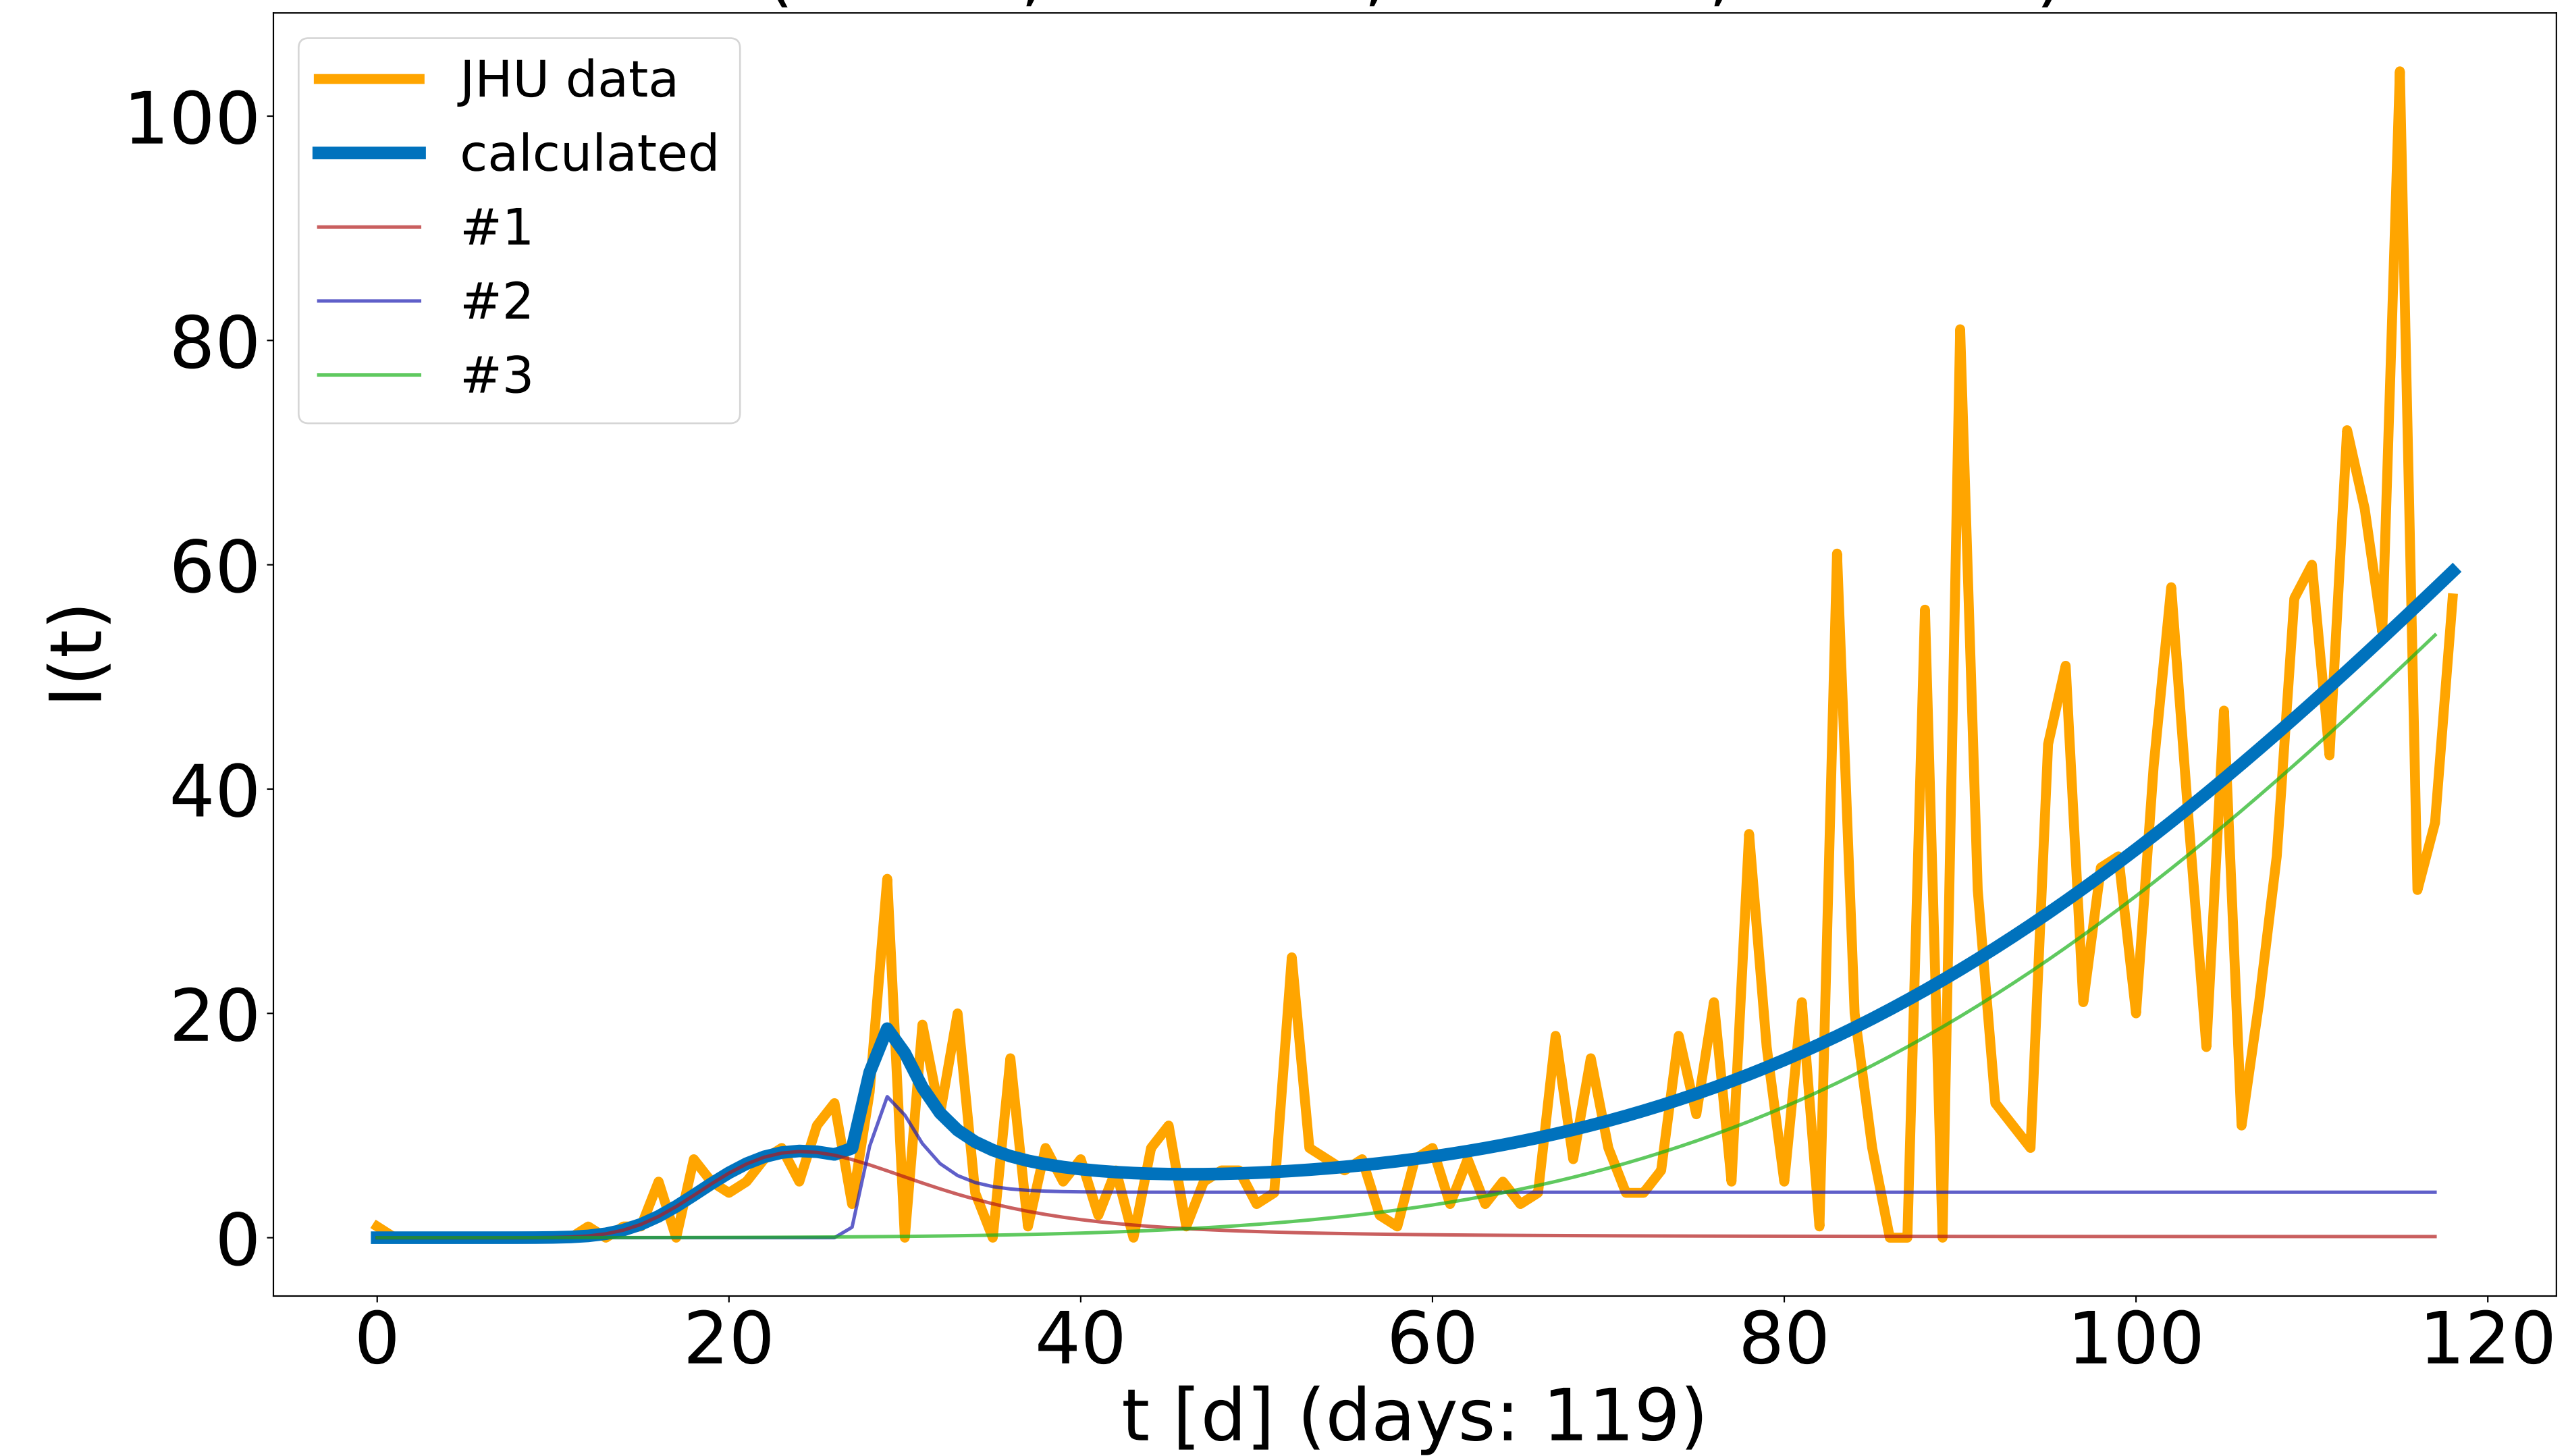

Spartanburg, South Carolina, US, Spartanburg ( $R^2 = 0.986$ )

(i: 3.7, a: 0.322, b: 0.107, t: 18.7)

(i: 0.1, a: 0.252, b: 0.016, t: 46.8)

(i: 20.2, a: 0.311, b: 0.392, t: 110.6)

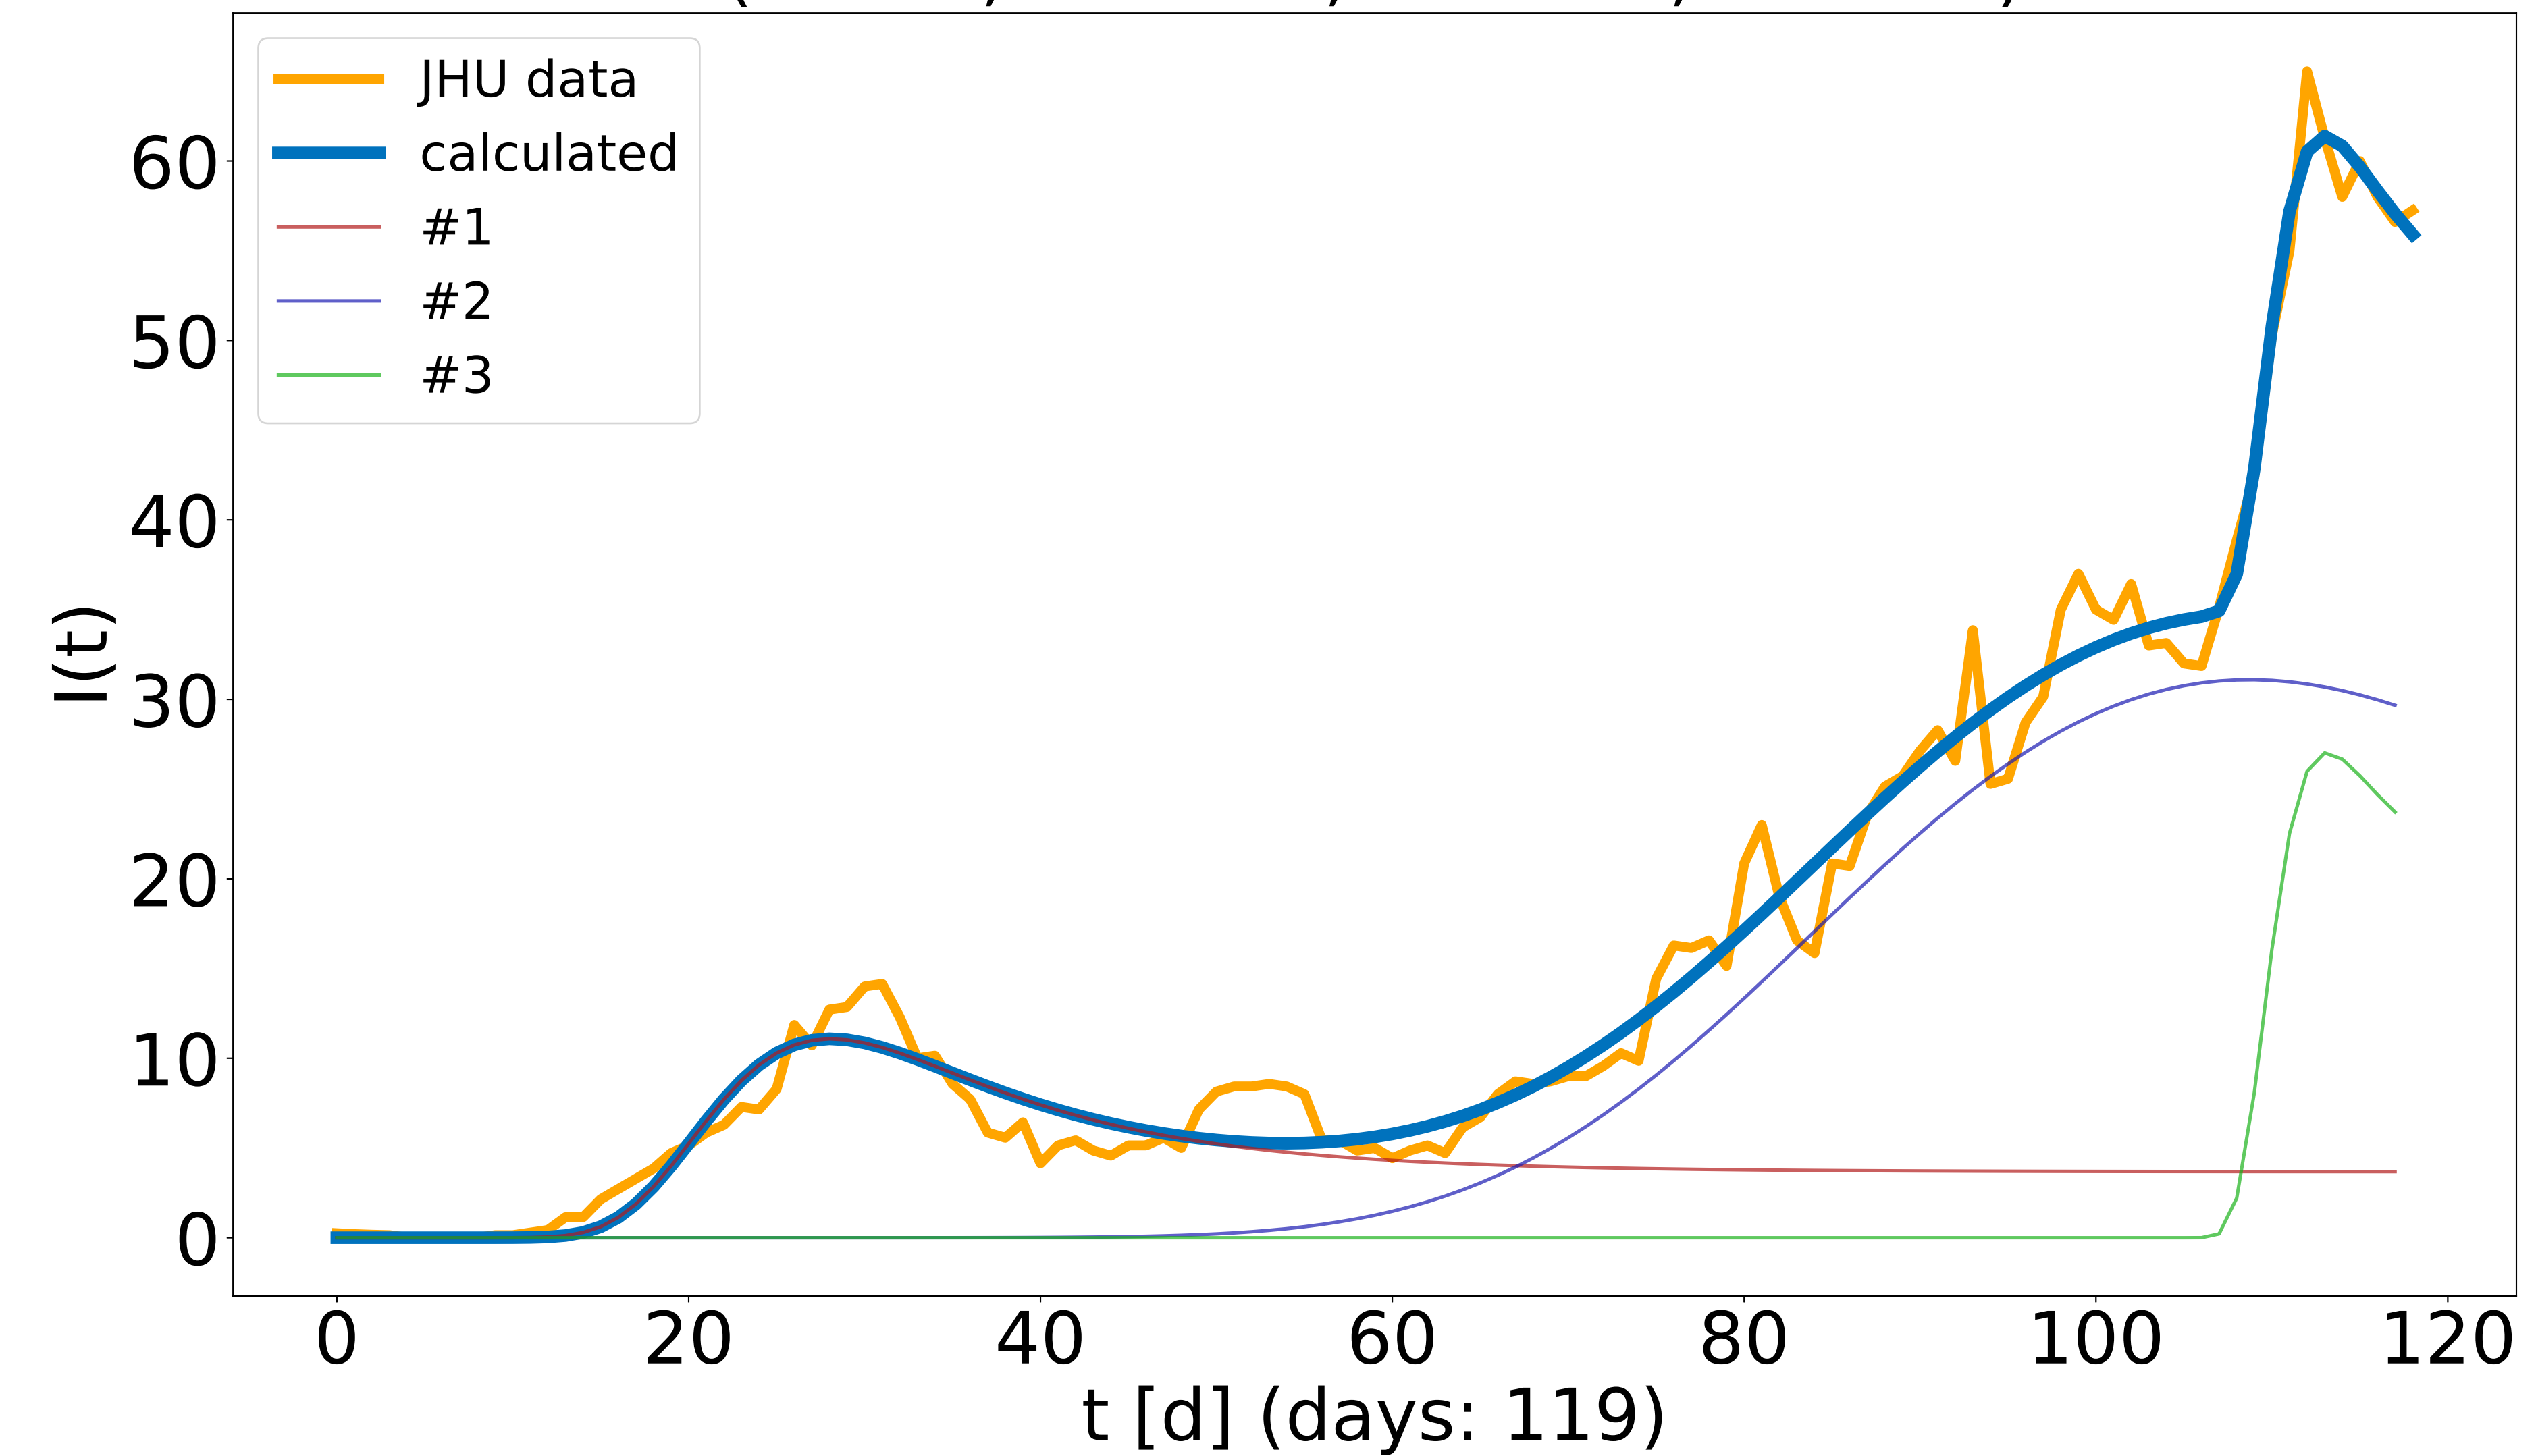

Minnehaha, South Dakota, US, Minnehaha ( $R^2 = 0.855$ )

(i: 0.1, a: 1.024, b: 0.053, t: 16.8)

(i: 12.6, a: 2.0, b: 0.297, t: 55.1)

(i: 0.1, a: 0.639, b: 1.387, t: 106.8)

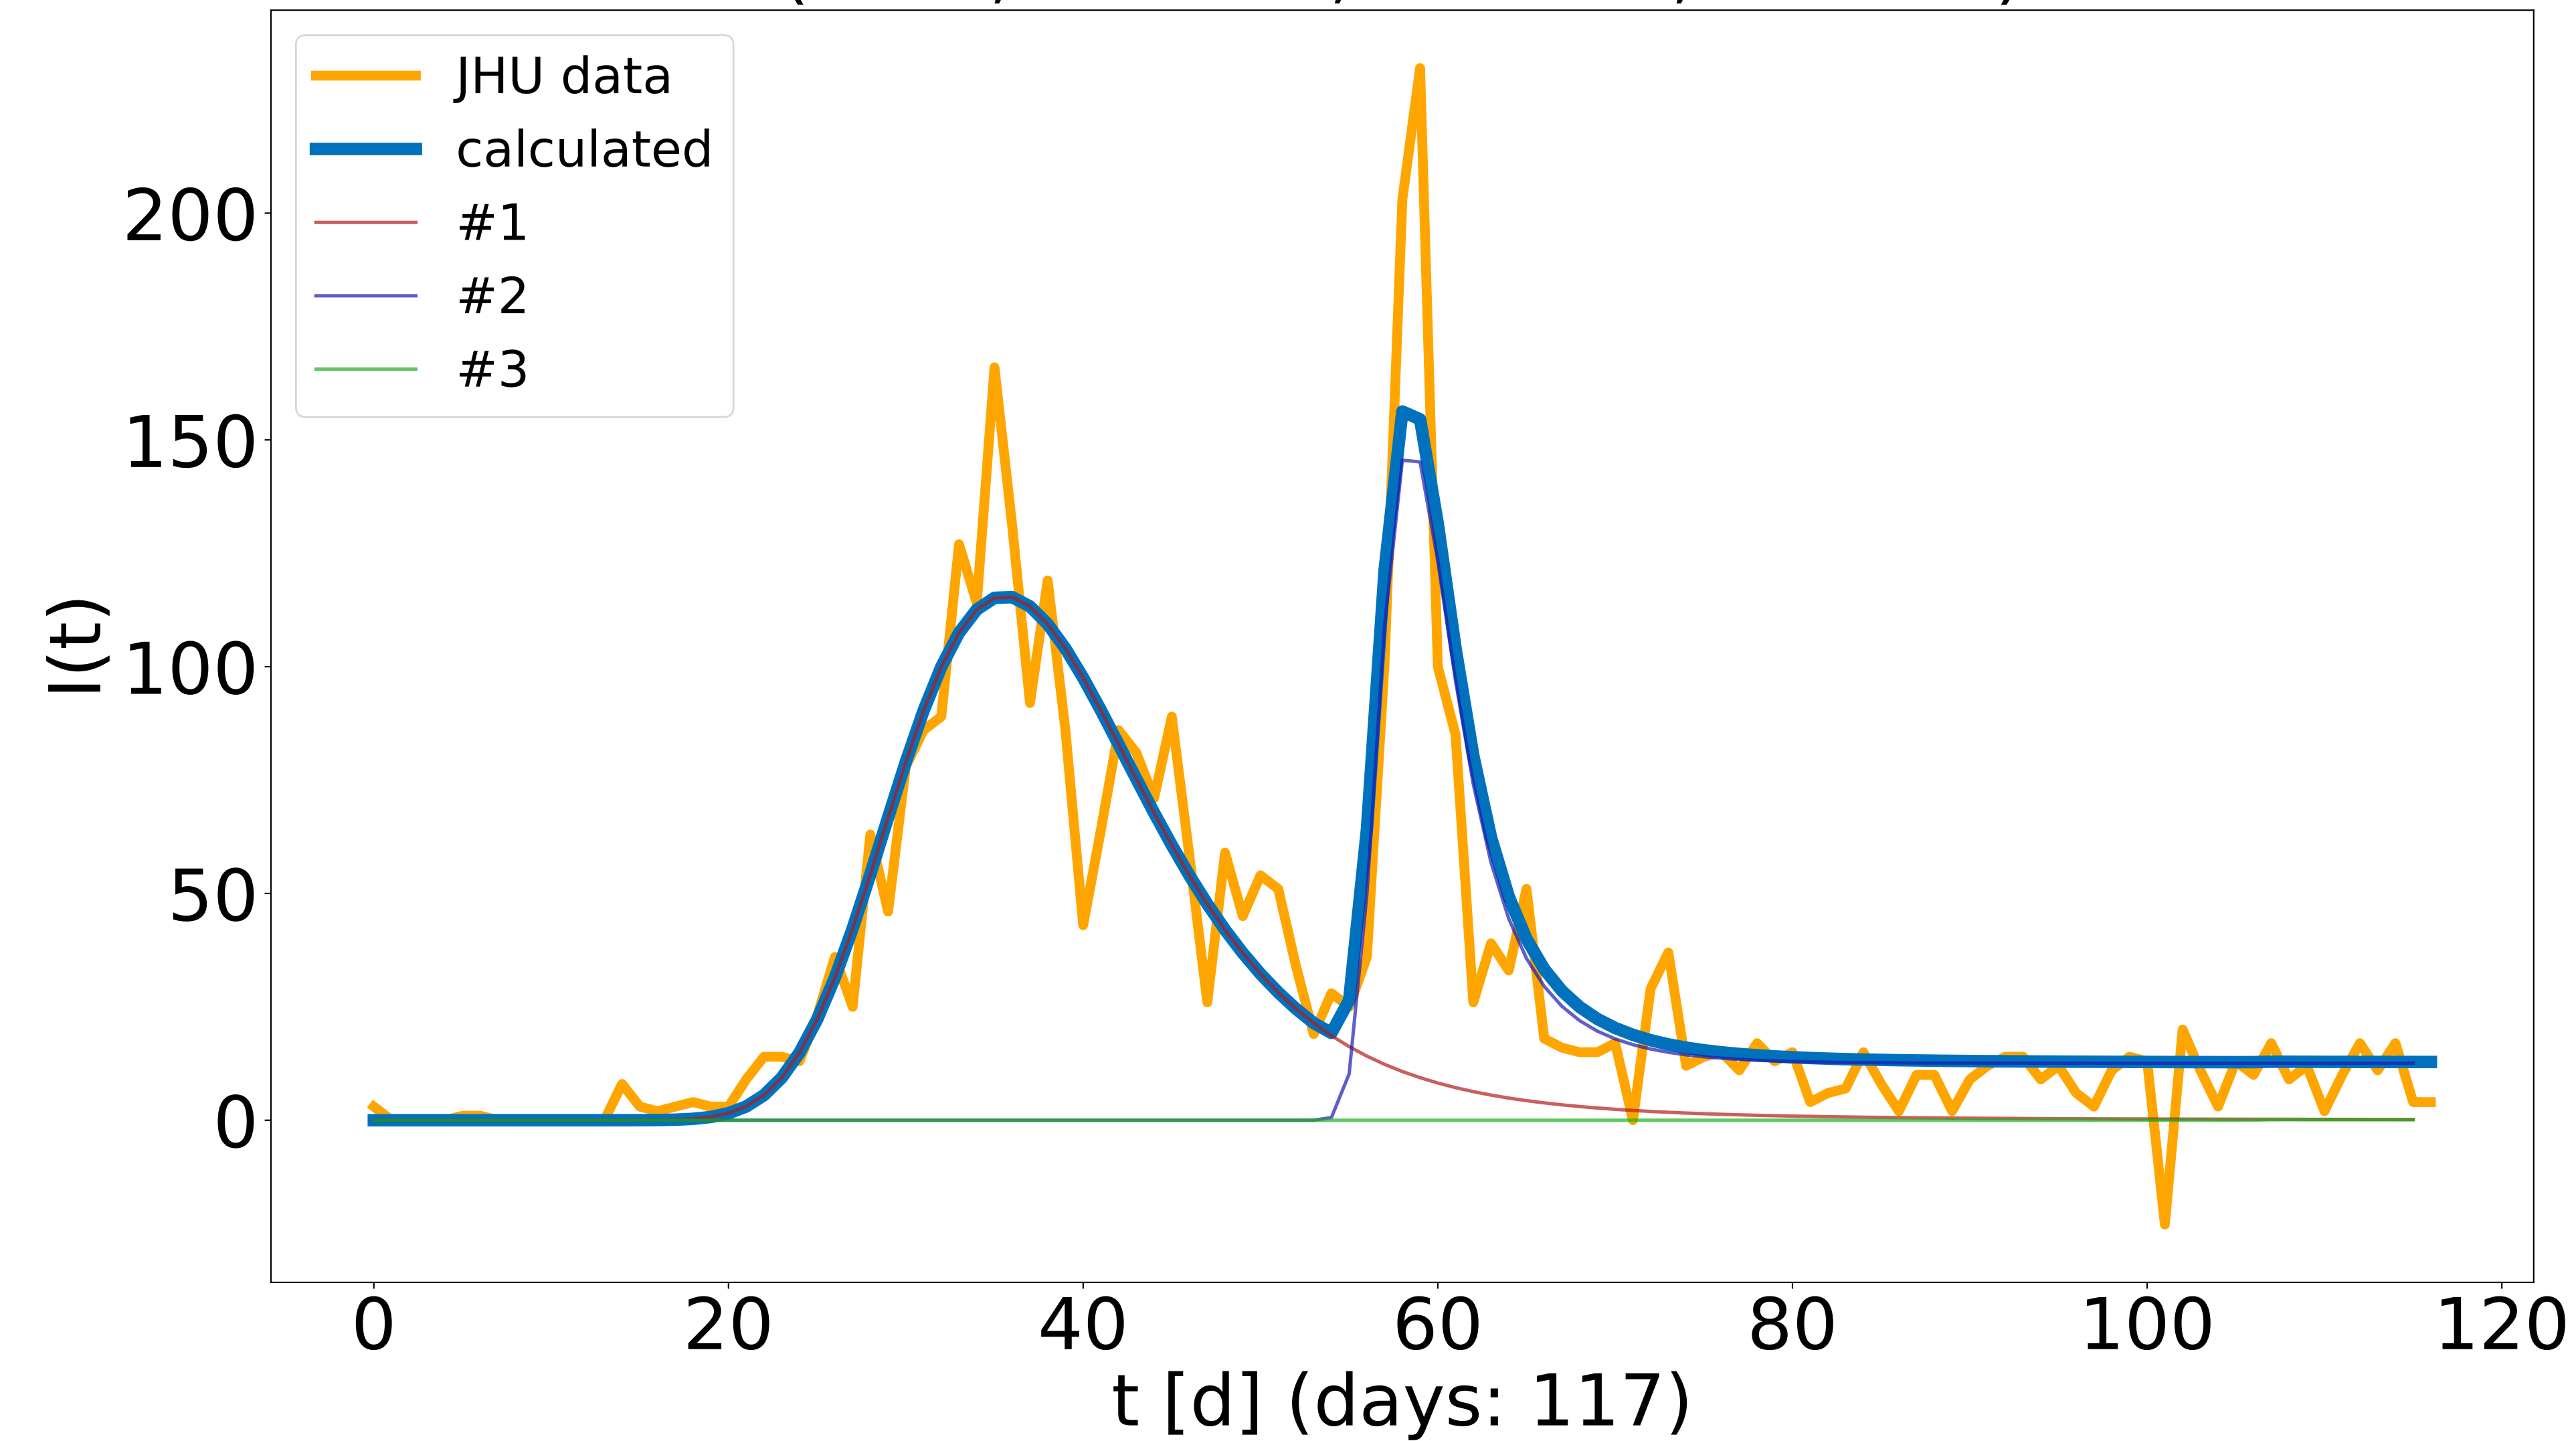

Minnehaha, South Dakota, US, Minnehaha ( $R^2 = 0.985$ )

(i: 2.0, a: 0.73, b: 0.067, t: 20.4)

(i: 0.8, a: 2.0, b: 0.152, t: 51.9)

(i: 5.3, a: 0.524, b: 0.451, t: 71.3)

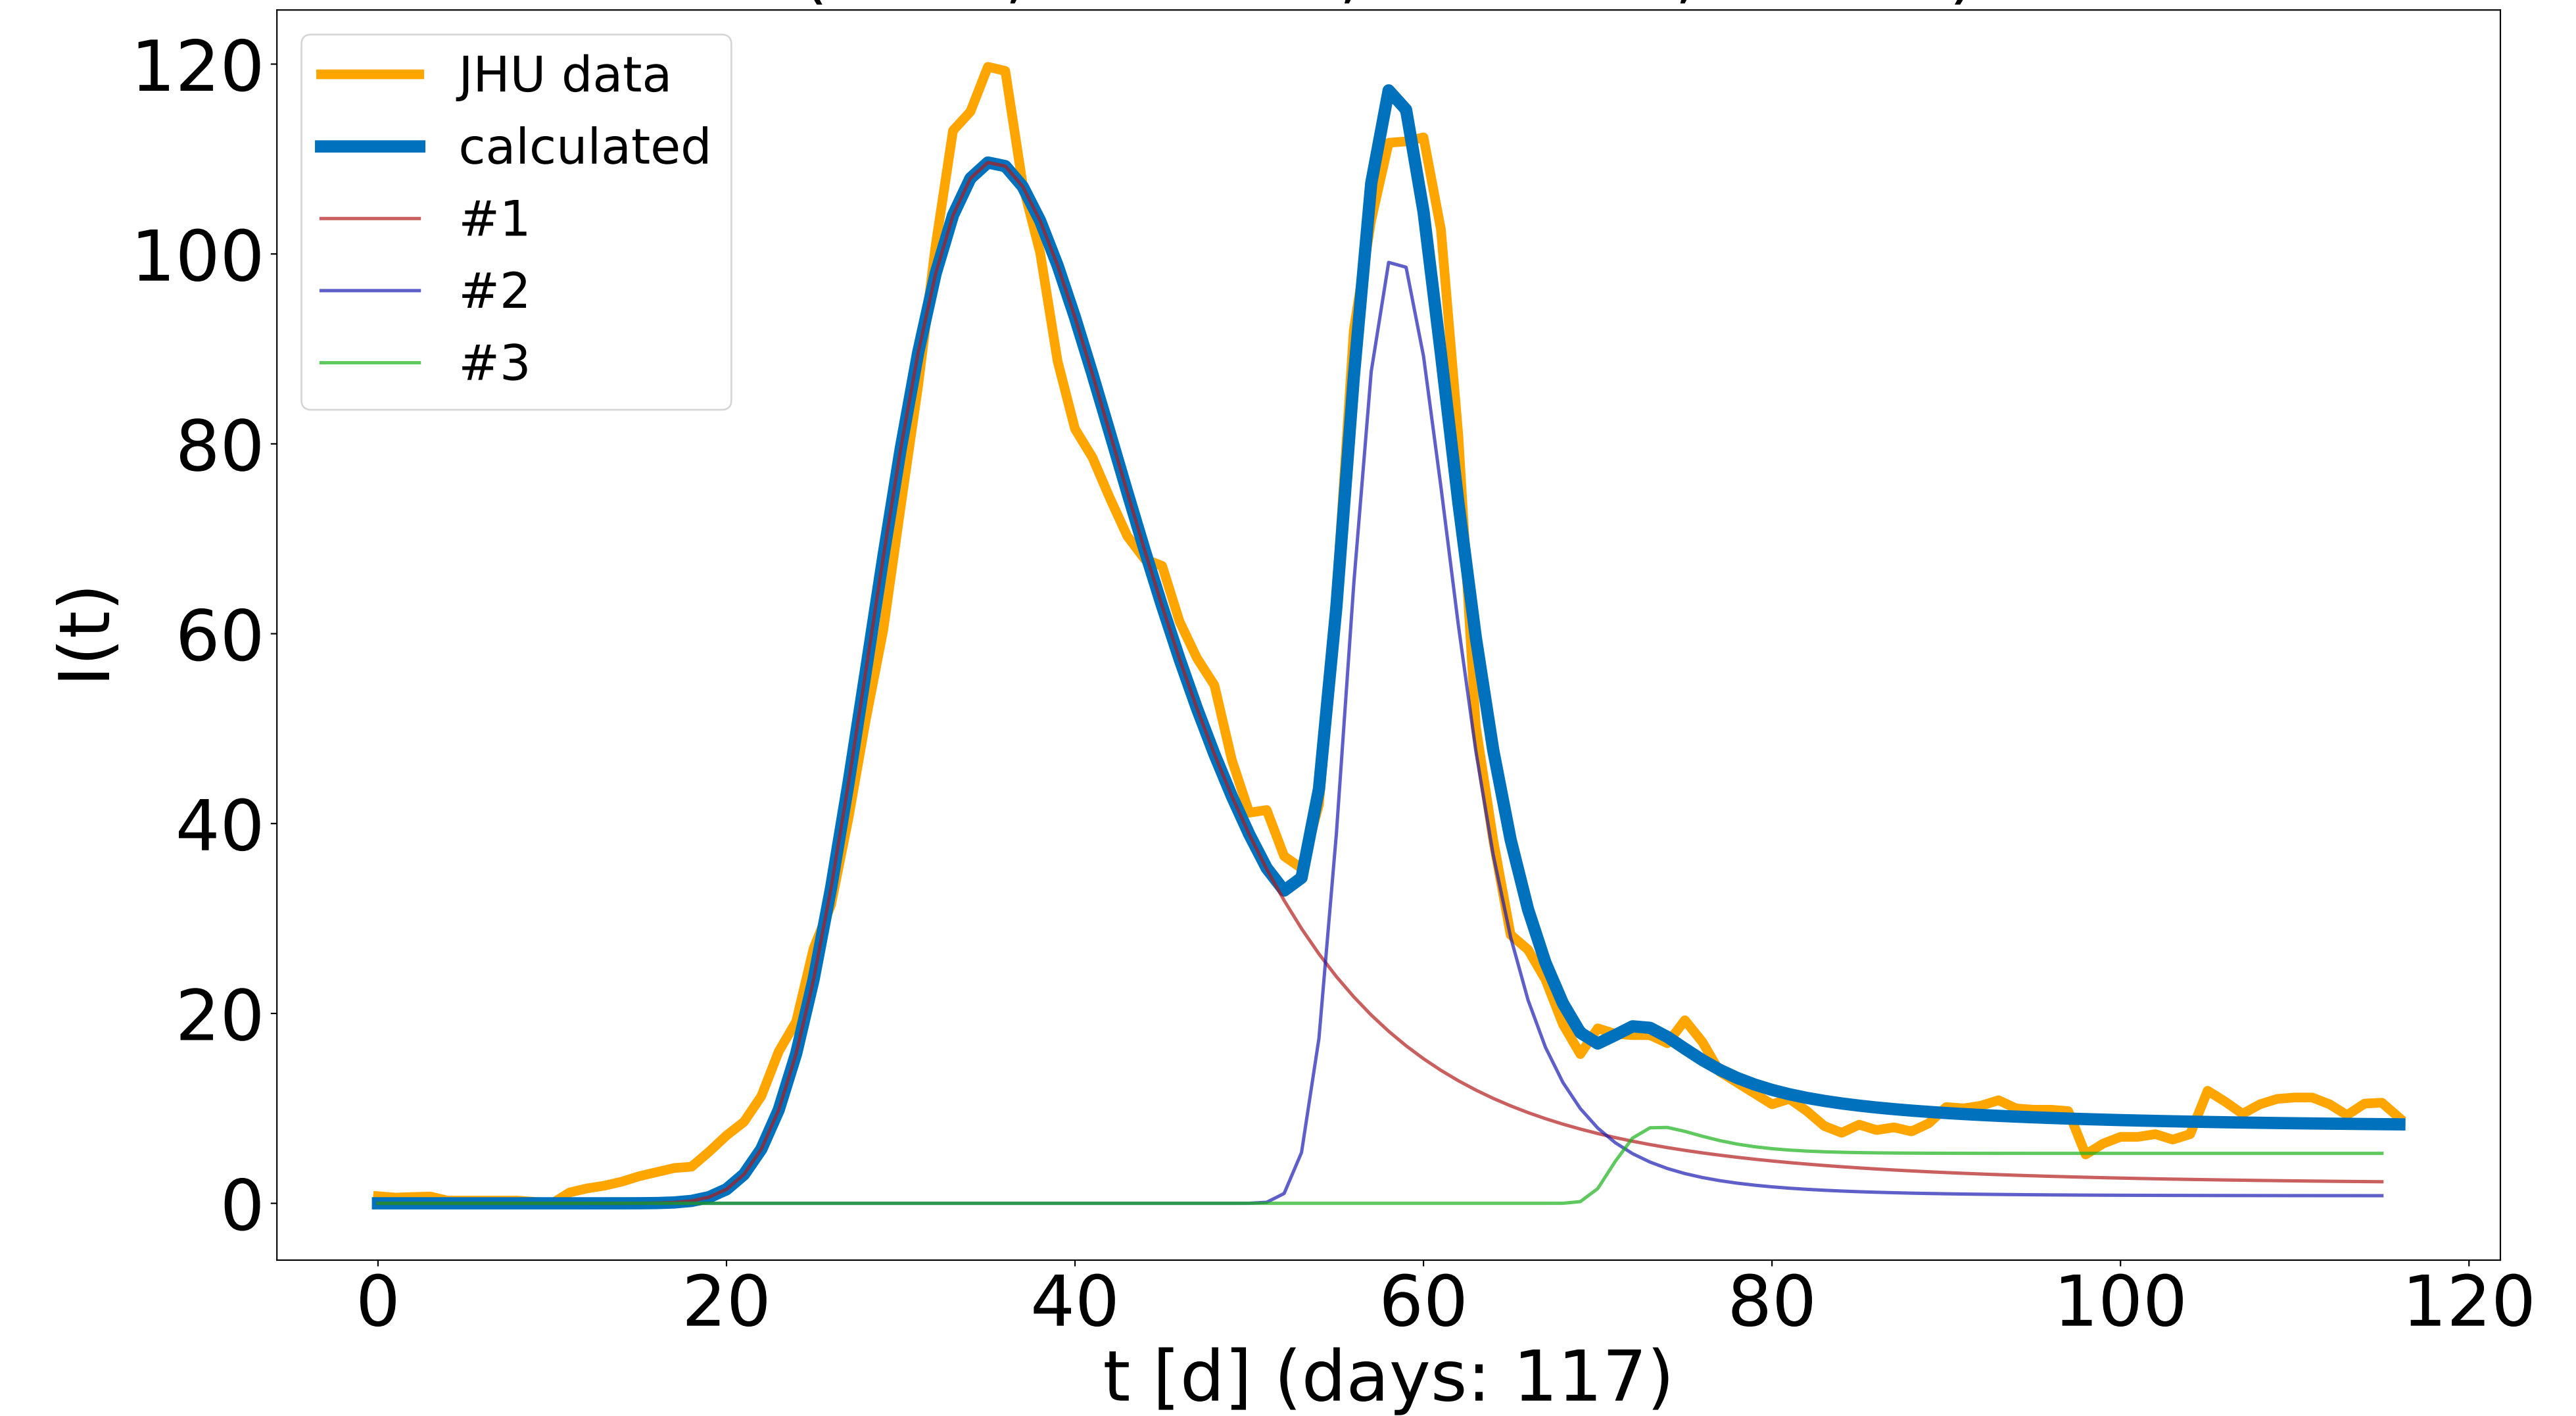

Ellis, Texas, US, Ellis ( $R^2 = 0.306$ )  
(i: 3.4, a: 0.003, b: 0.158, t: 24.3)  
(i: 2.9, a: 2.0, b: 1.106, t: 32.9)  
(i: 0.1, a: 0.697, b: 0.043, t: 84.0)

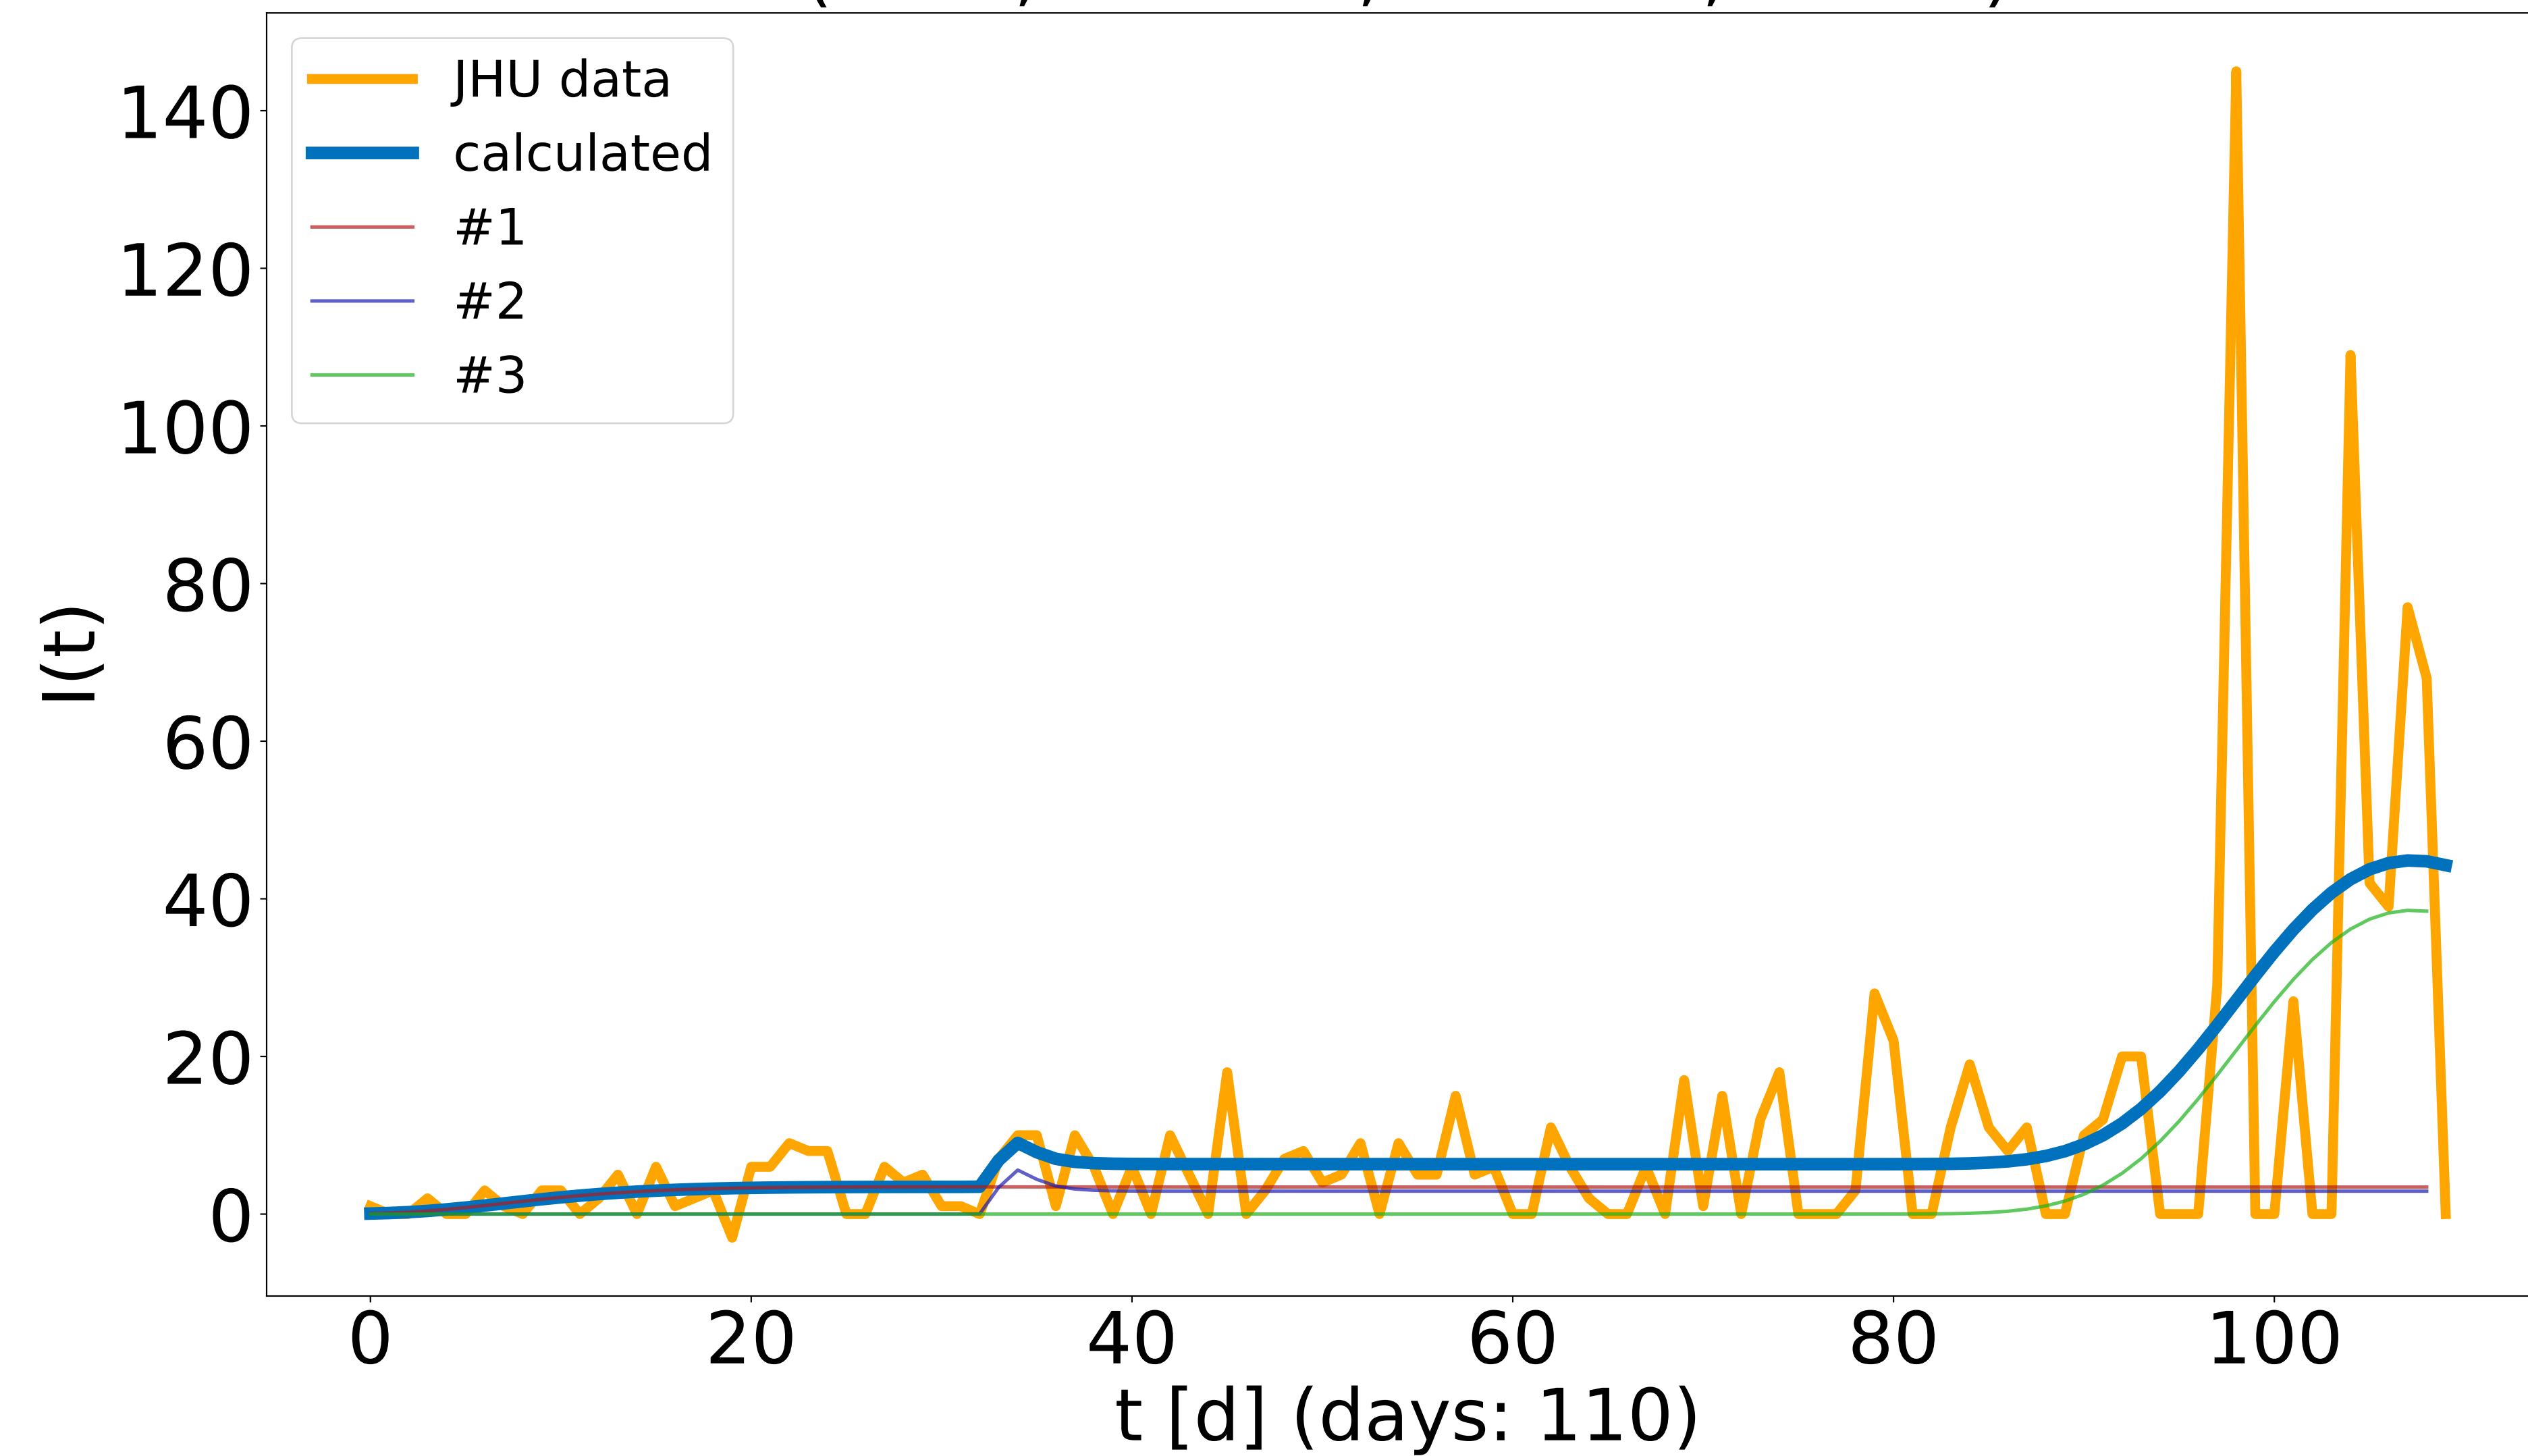

Ellis, Texas, US, Ellis ( $R^2 = 0.971$ )  
(i: 19.1, a: 0.345, b: 1.4, t: 95.1)  
(i: 8.7, a: 1.041, b: 0.42, t: 103.8)  
(i: 12.9, a: 0.005, b: 0.007, t: 140.0)

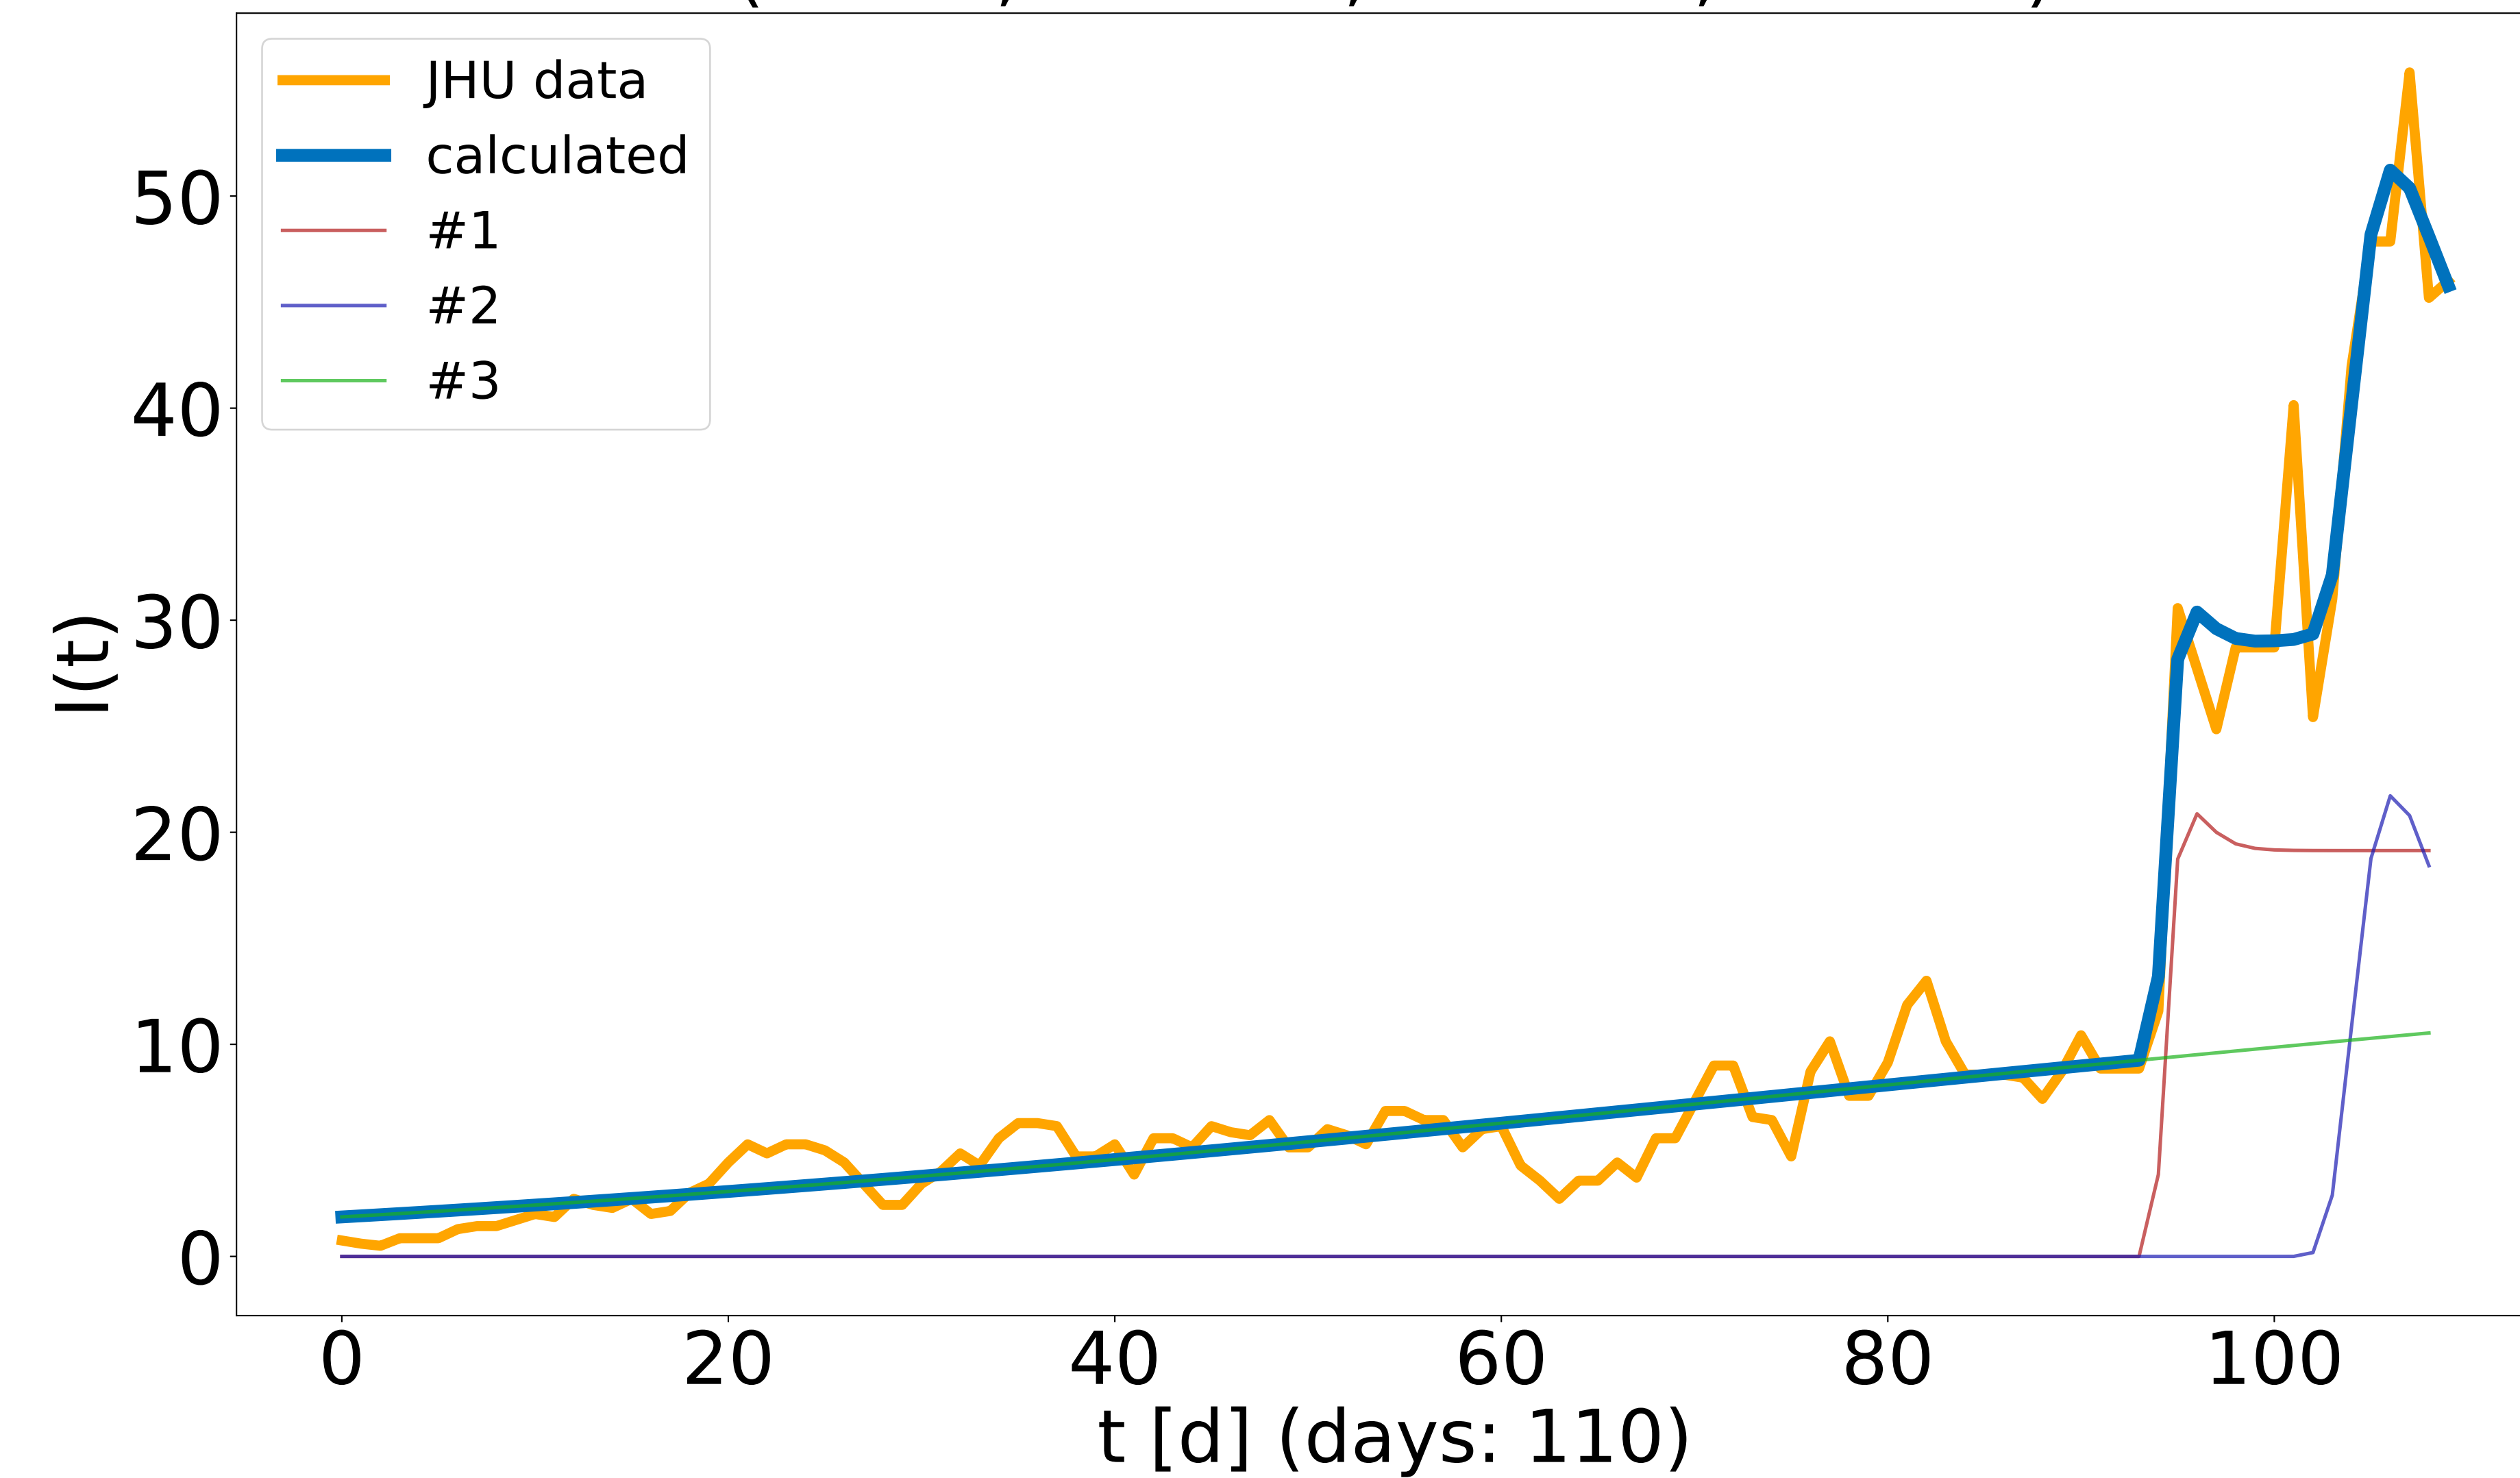



Harris, Texas, US, Harris ( $R^2 = 0.68$ )  
(i: 0.1, a: 0.236, b: 0.011, t: 1.0)  
(i: 0.1, a: 1.337, b: 0.062, t: 17.4)  
(i: 0.1, a: 1.79, b: 0.071, t: 96.6)

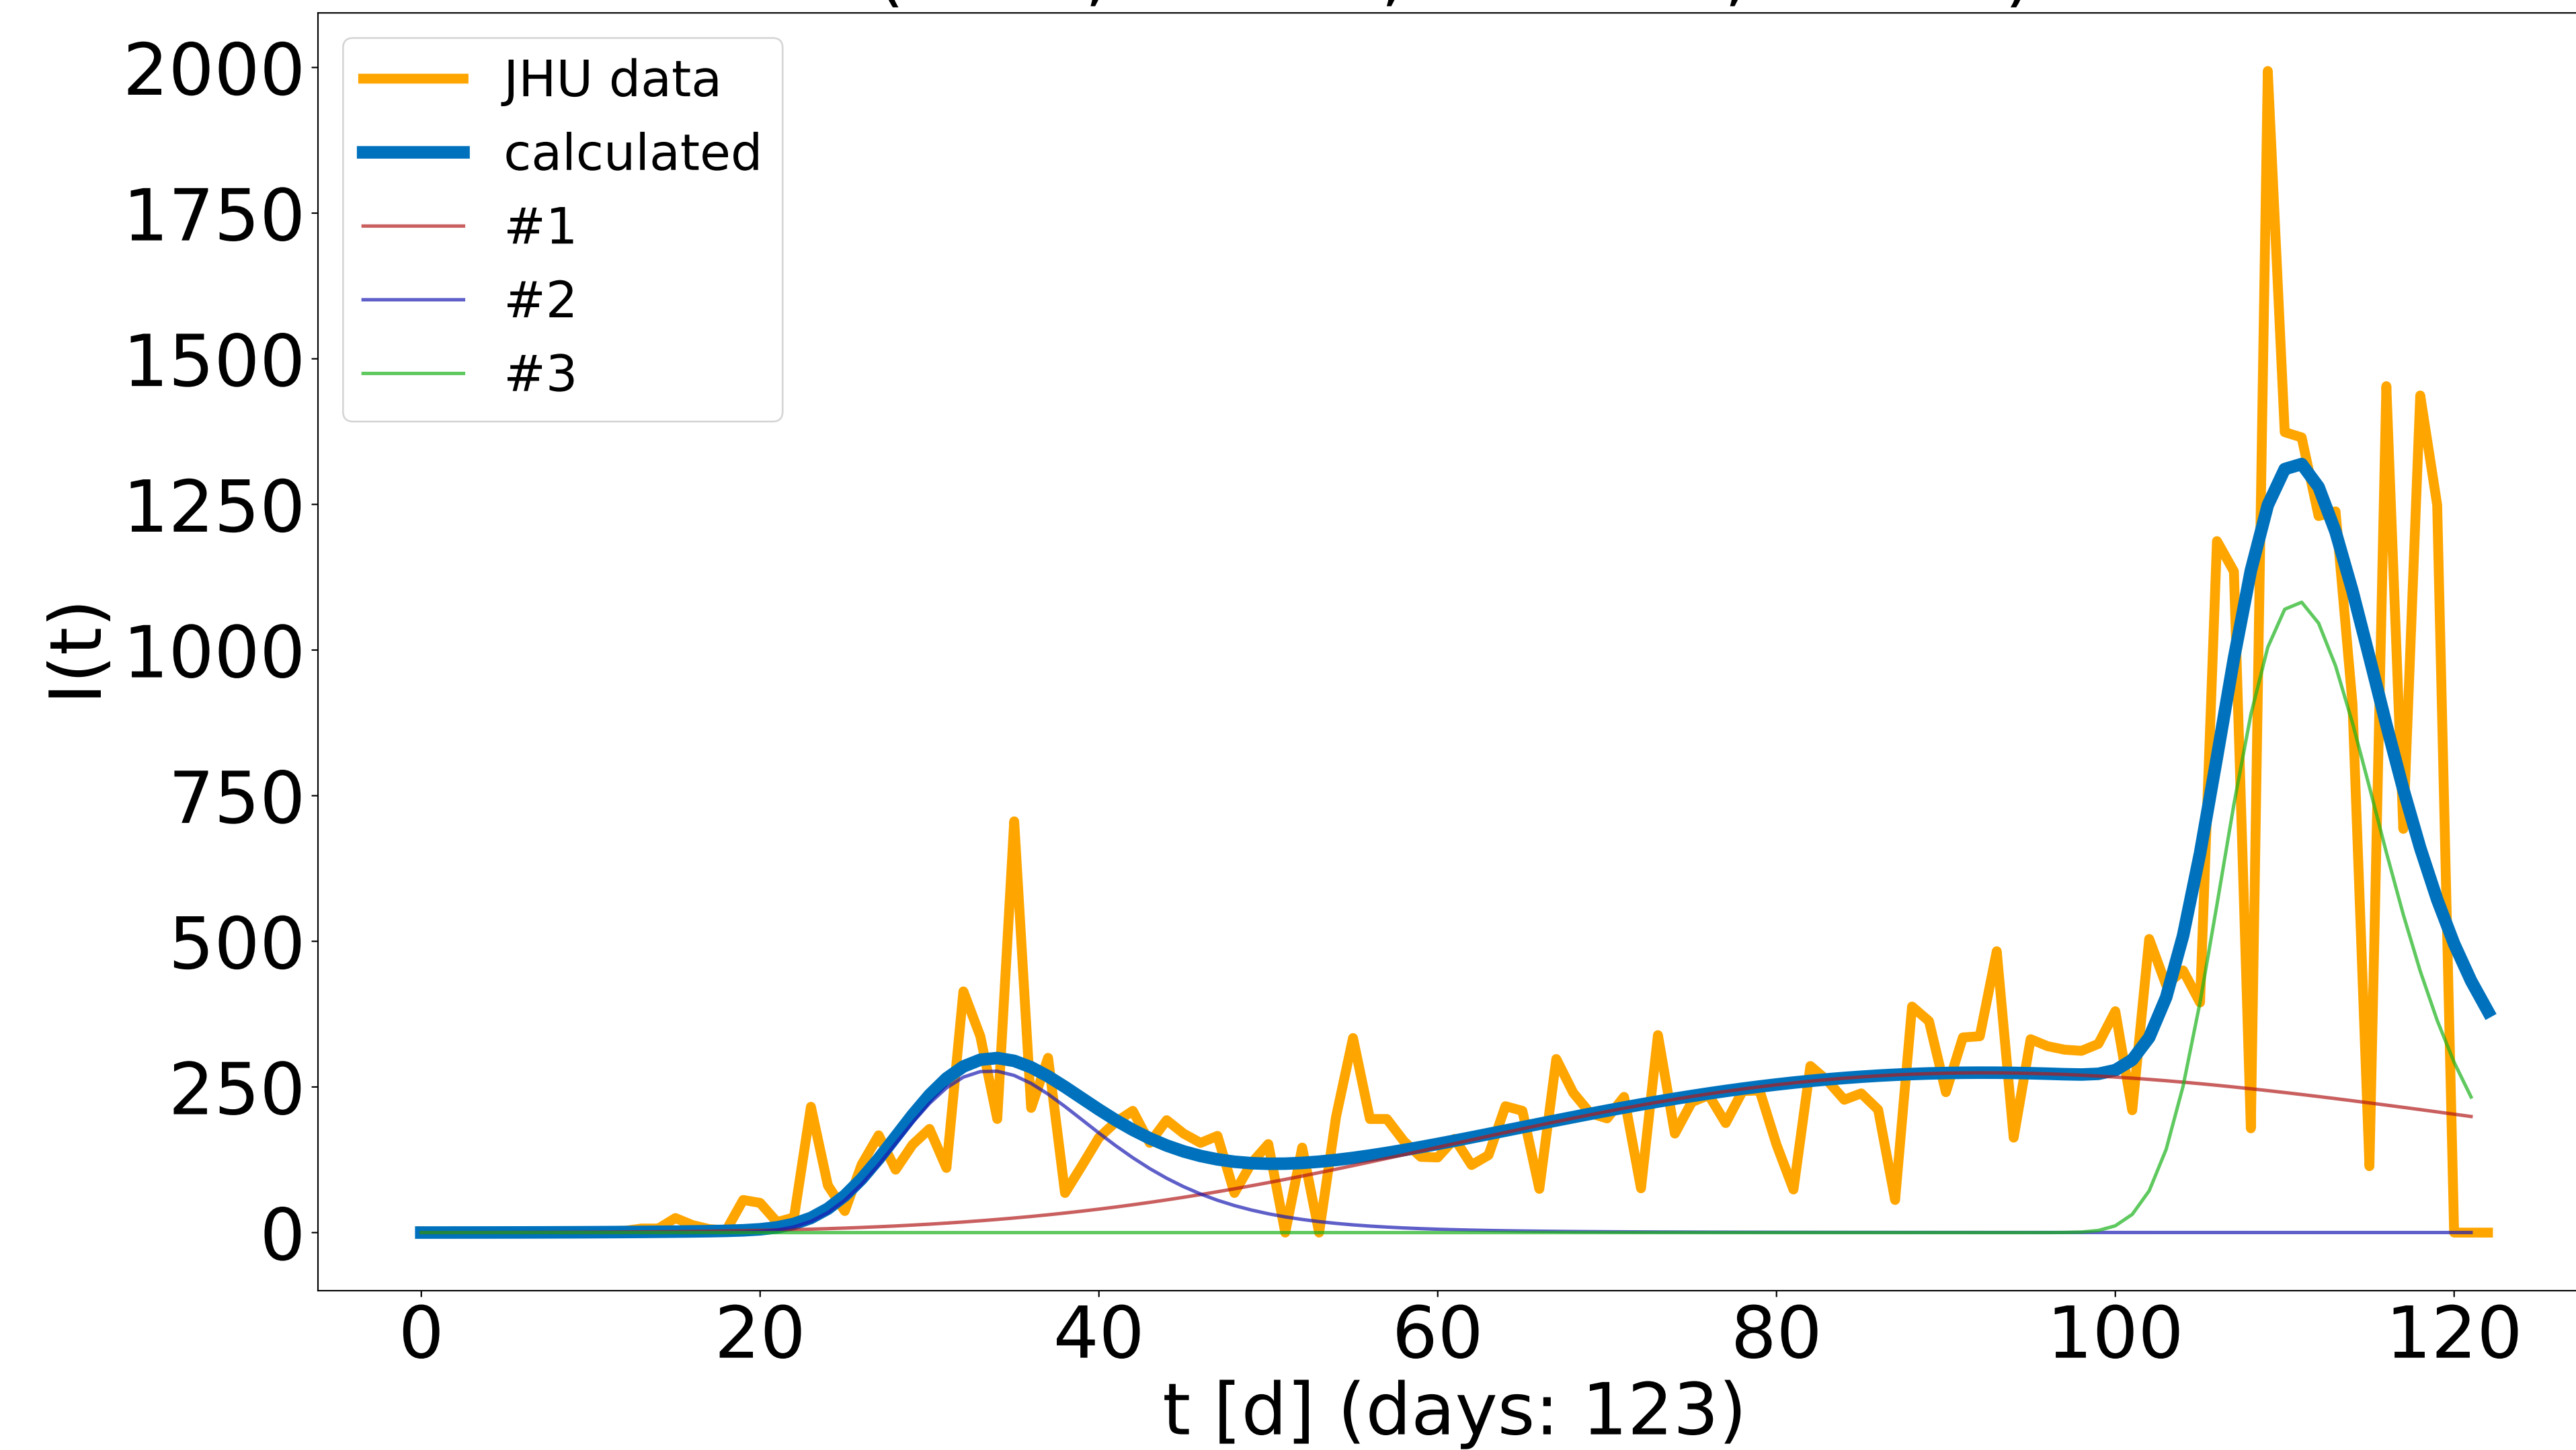

Harris, Texas, US, Harris ( $R^2 = 0.987$ )  
(i: 4.8, a: 0.099, b: 0.009, t: 1.0)  
(i: 0.1, a: 1.444, b: 0.068, t: 18.7)  
(i: 0.1, a: 1.658, b: 0.067, t: 95.7)

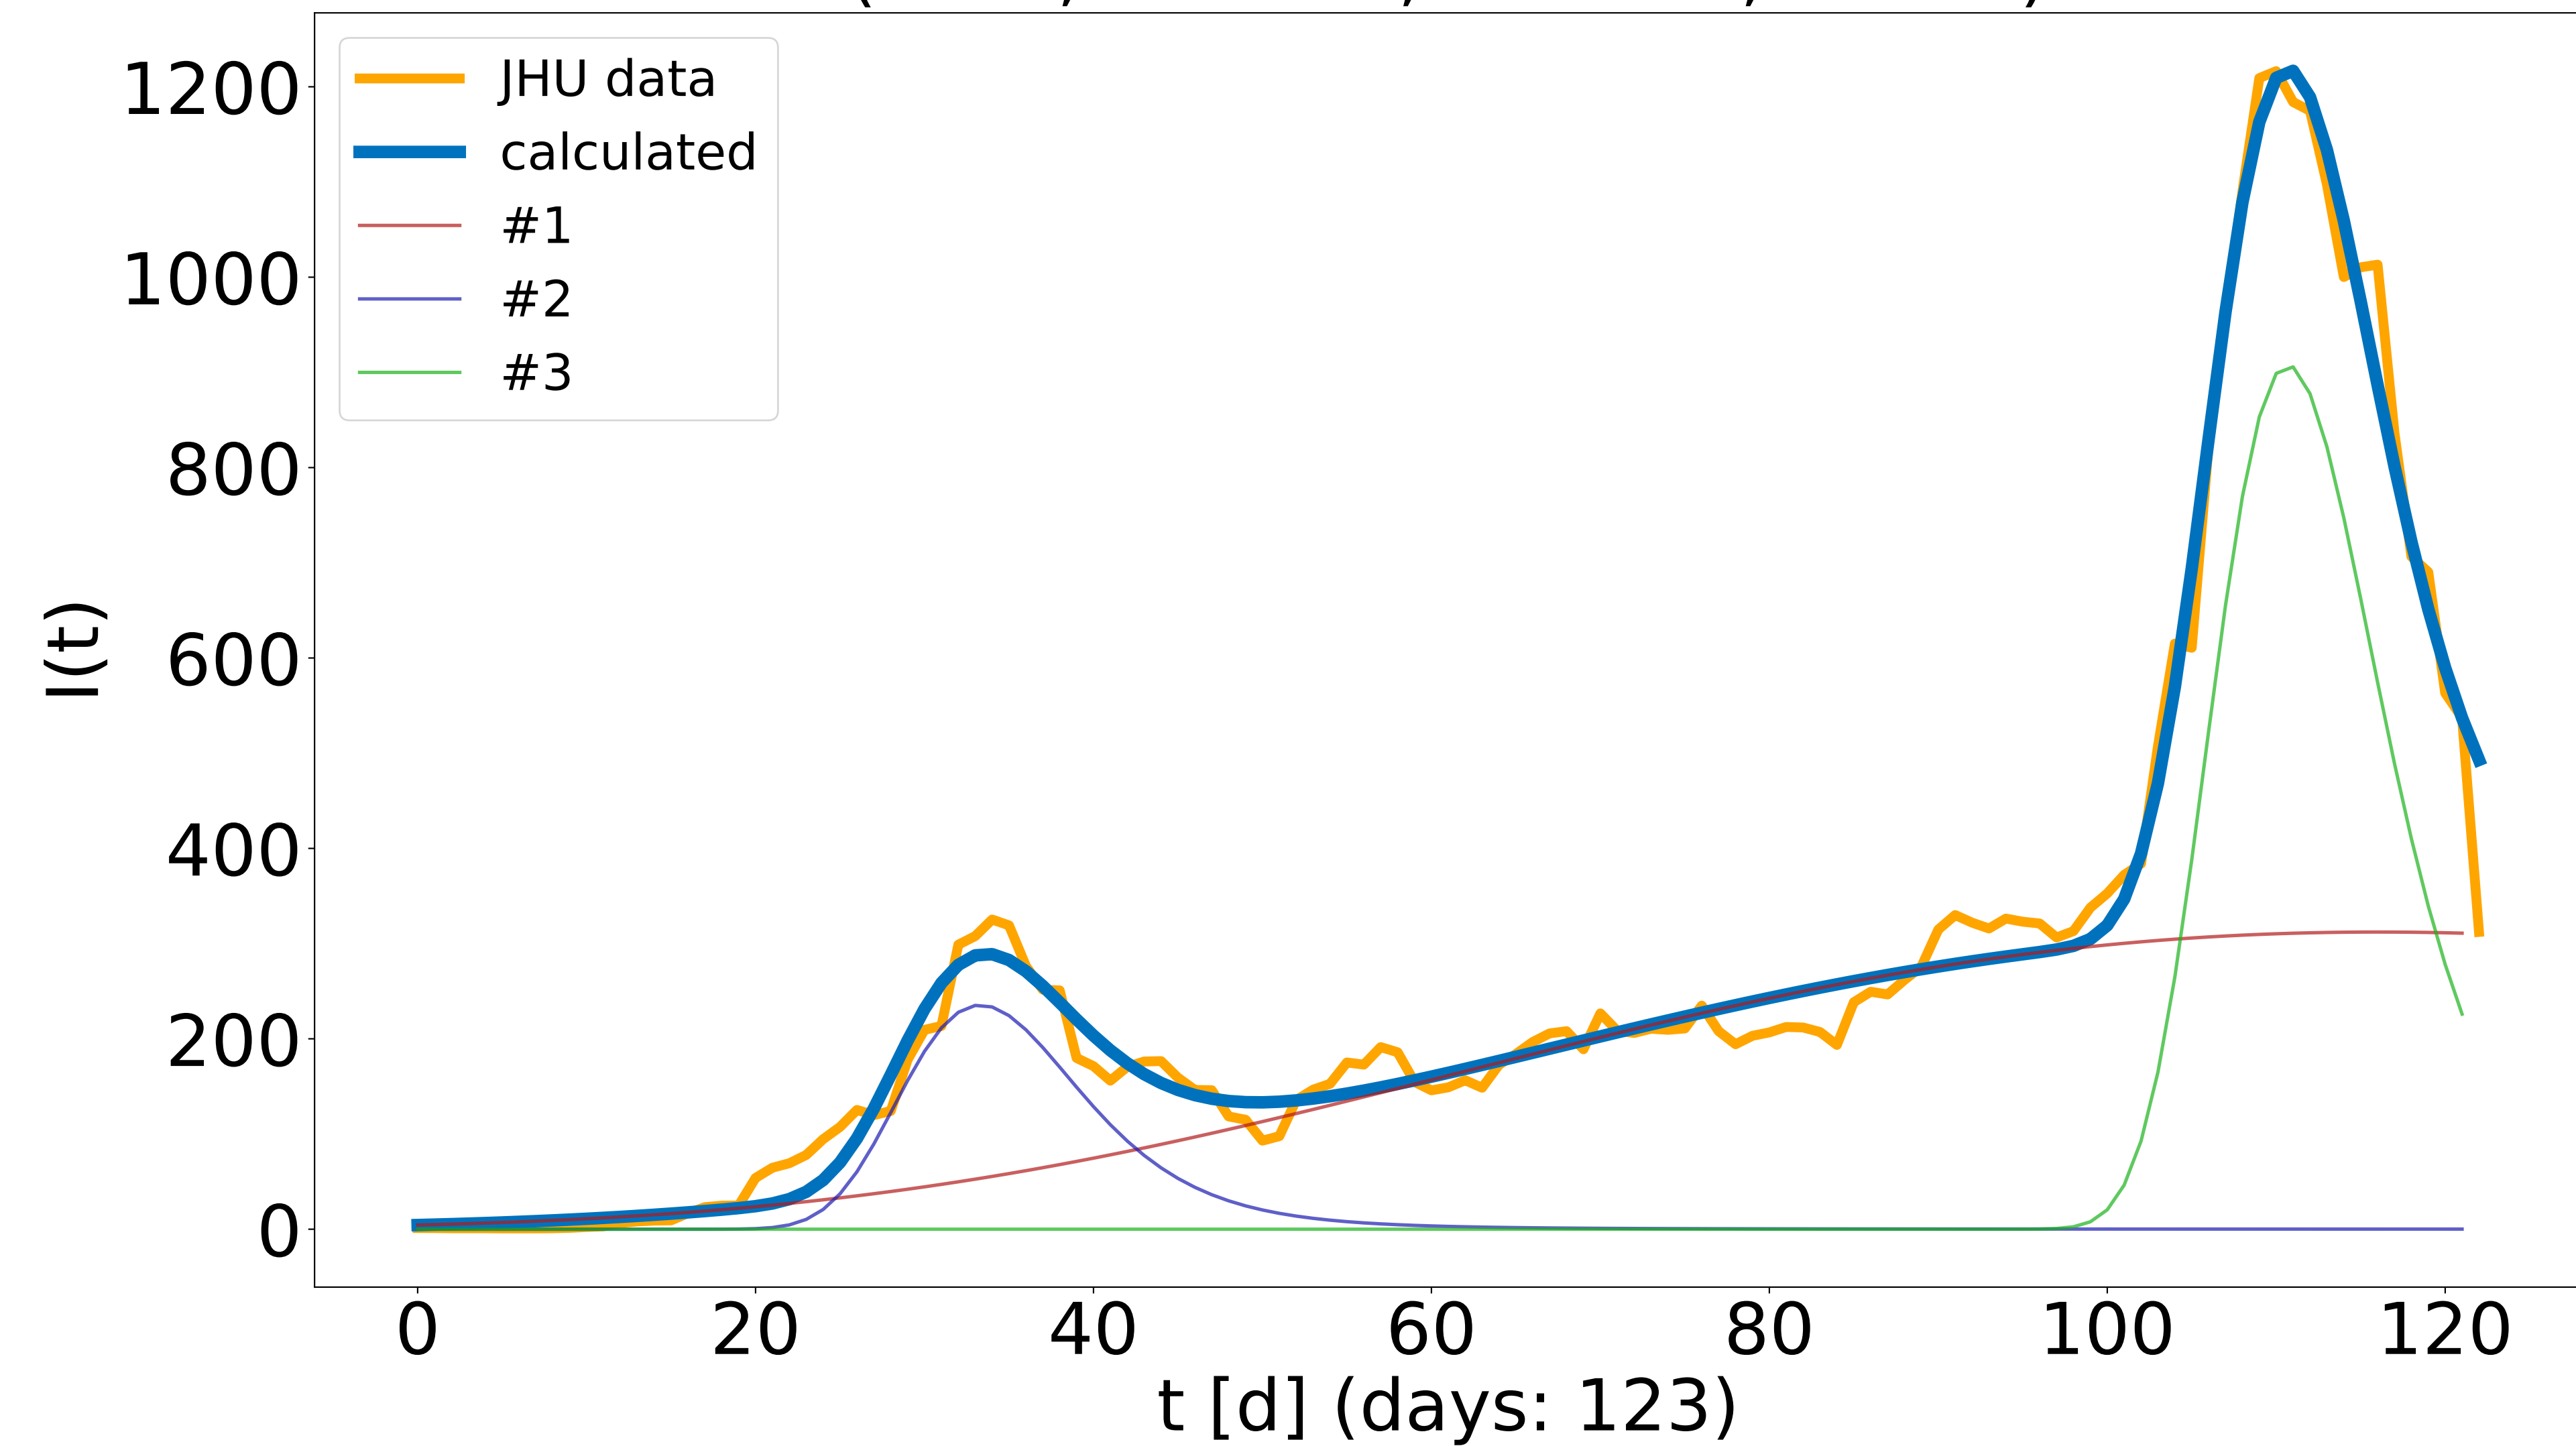

Midland, Texas, US, Midland ( $R^2 = 0.417$ )  
(i: 0.8, a: 2.0, b: 0.438, t: 51.5)  
(i: 4.3, a: 0.04, b: 1.4, t: 75.7)  
(i: 0.1, a: 1.014, b: 0.064, t: 82.0)

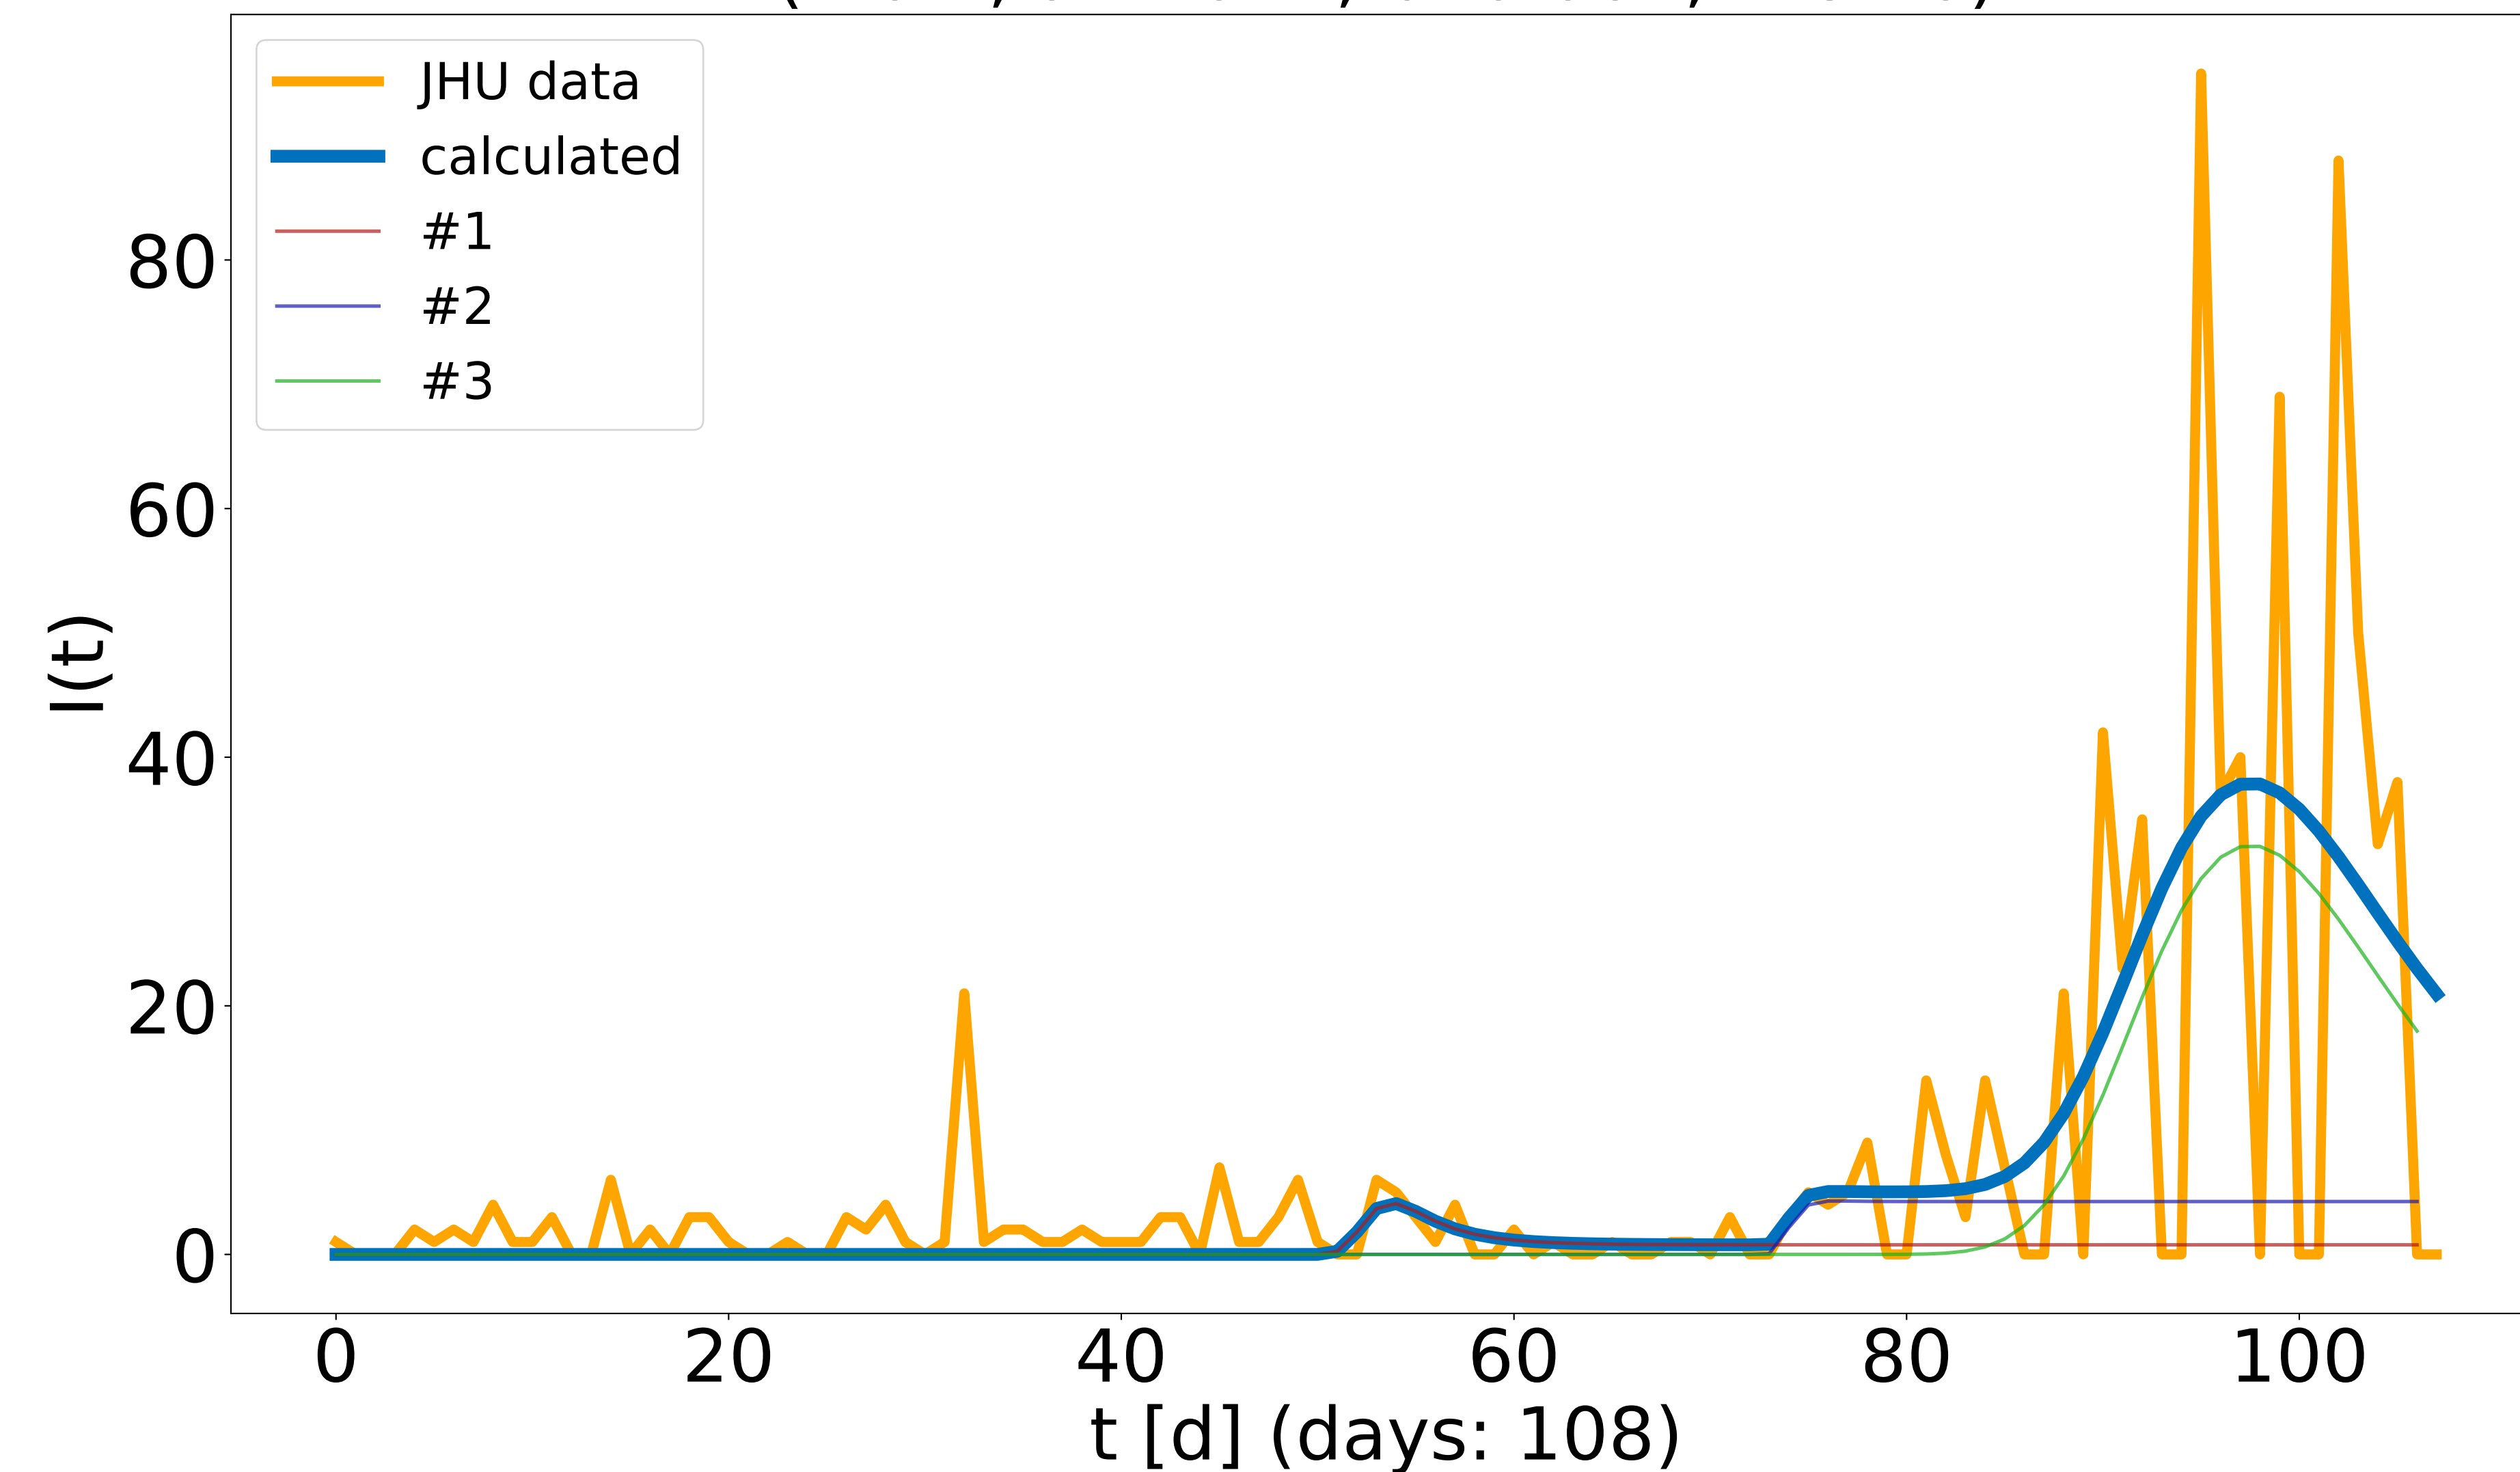

Midland, Texas, US, Midland ( $R^2 = 0.977$ )  
(i: 0.3, a: 0.179, b: 0.032, t: 1.0)  
(i: 0.1, a: 1.097, b: 0.105, t: 70.6)  
(i: 0.1, a: 0.824, b: 0.052, t: 79.2)

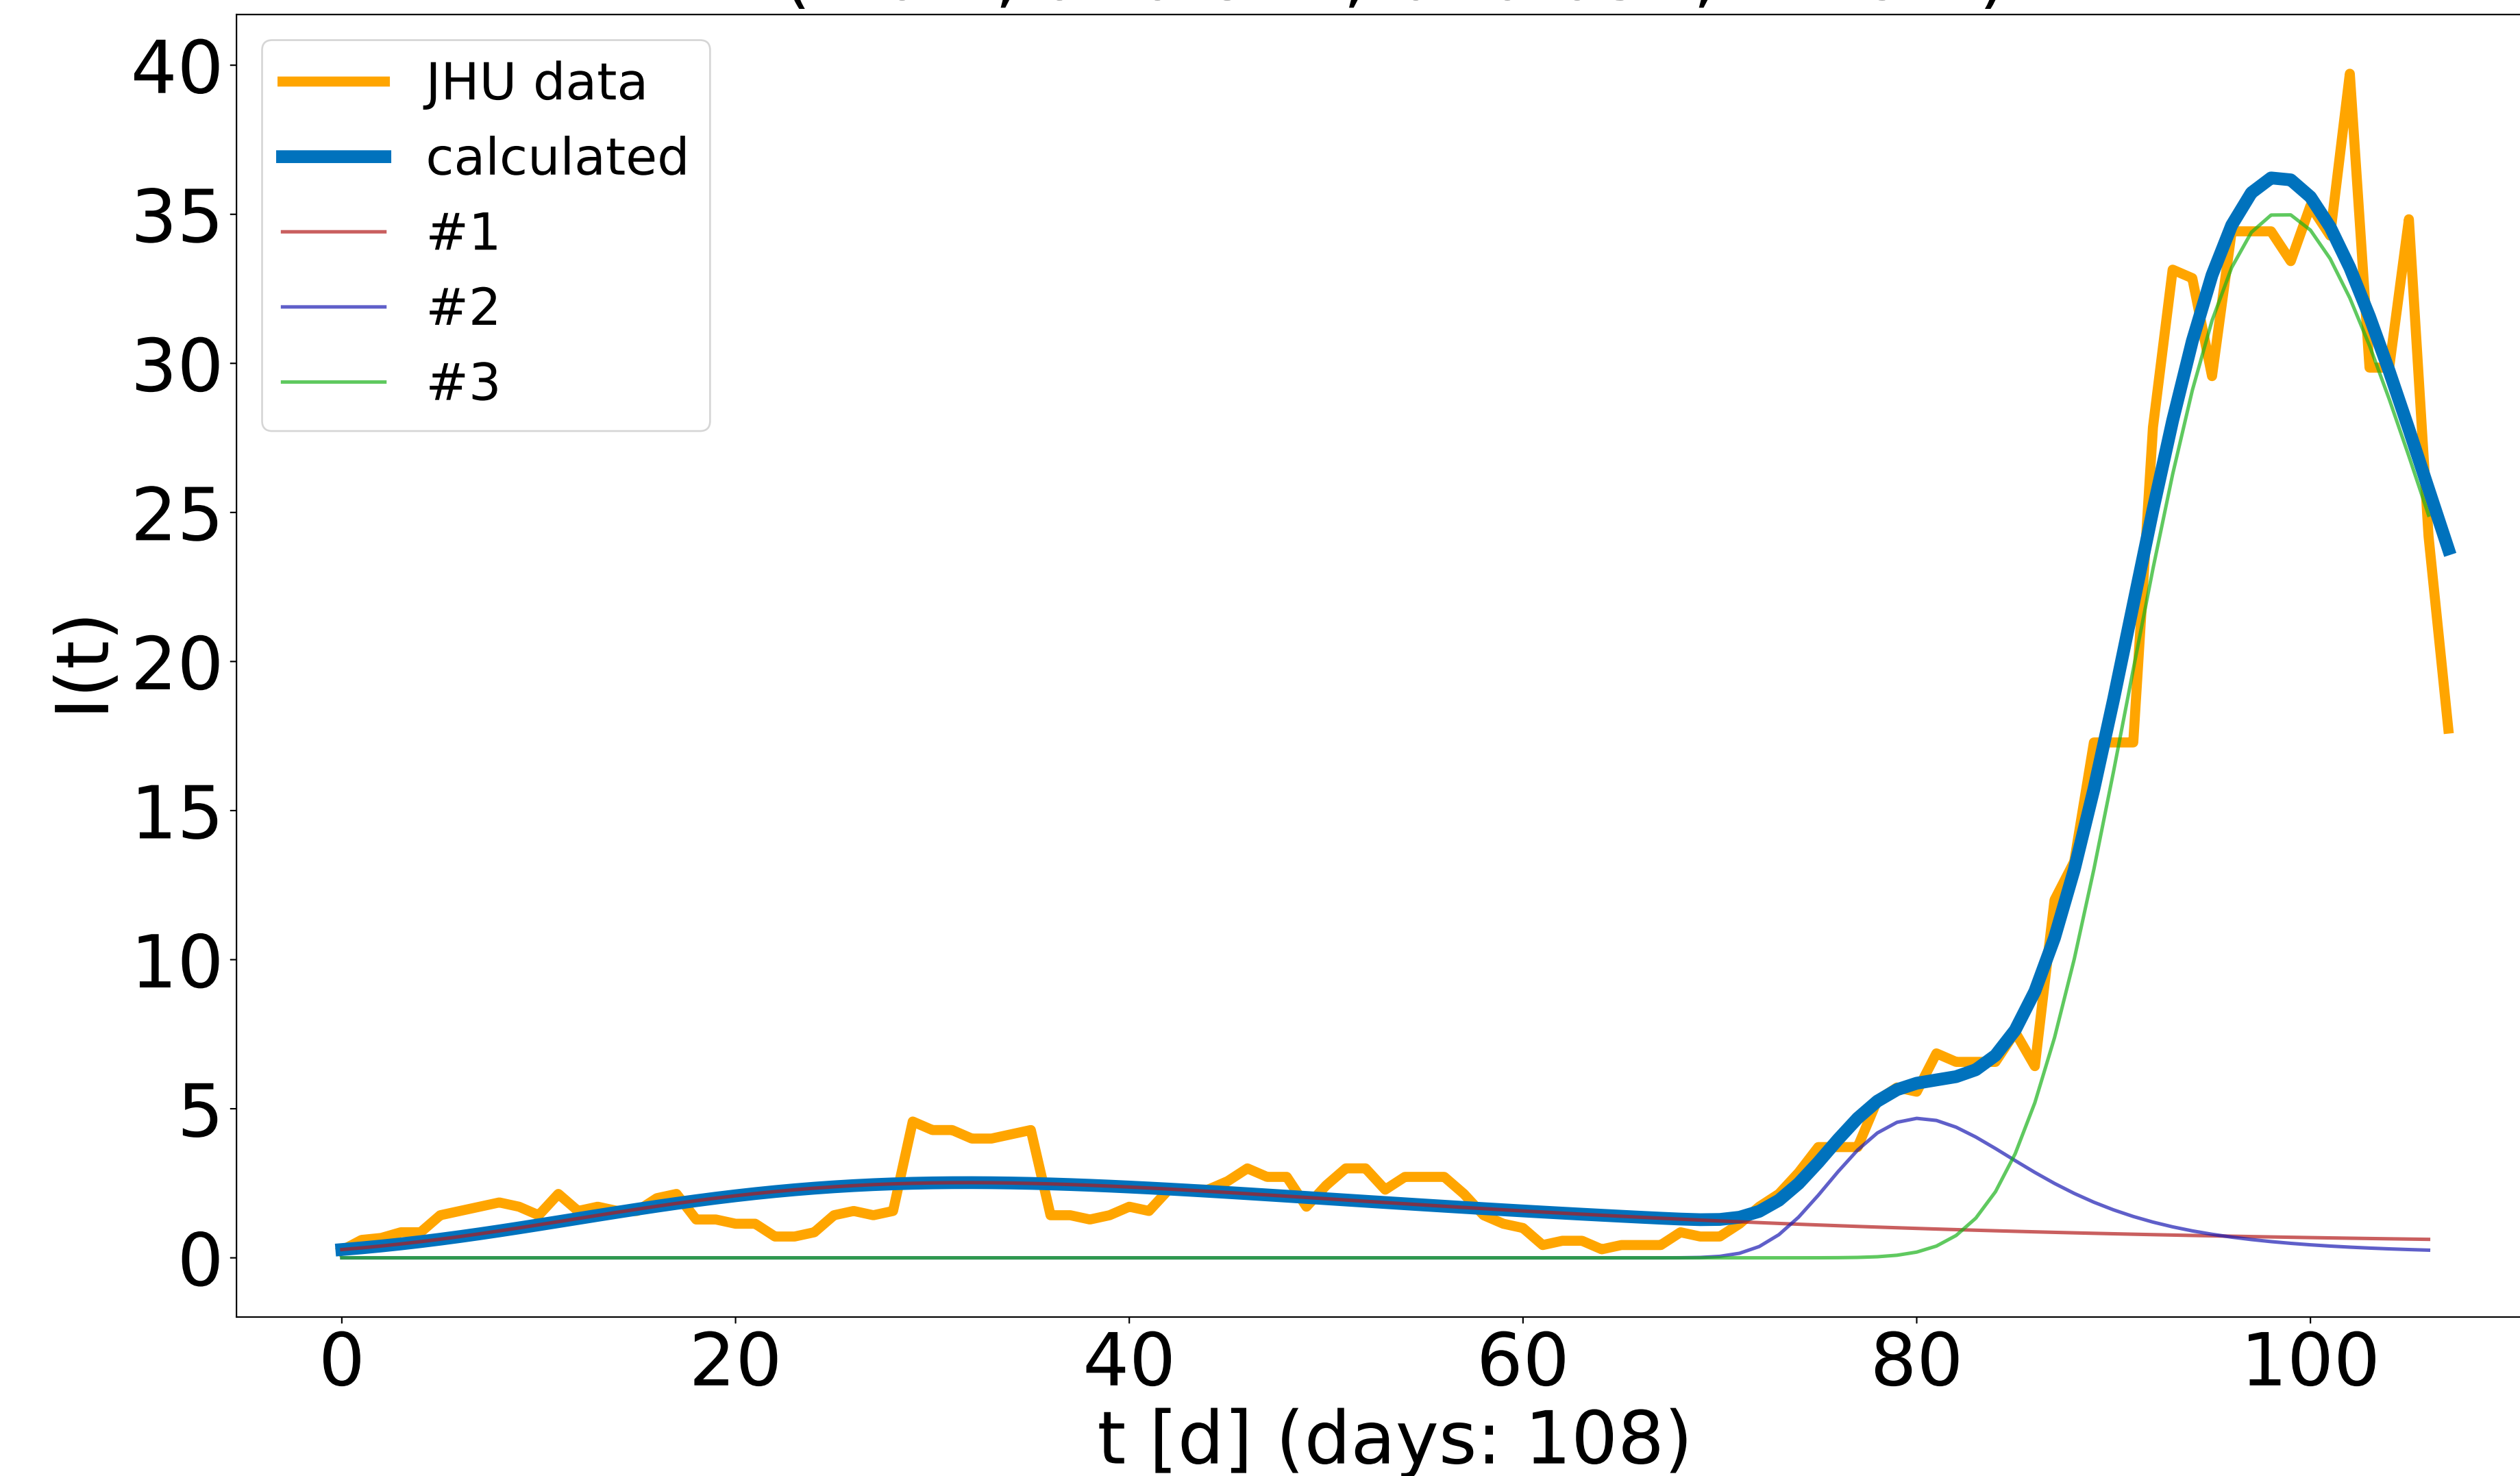

Victoria, Texas, US, Victoria ( $R^2 = 0.512$ )  
(i: 2.2, a: 0.001, b: 0.02, t: 38.9)  
(i: 3.6, a: 2.0, b: 0.304, t: 88.9)  
(i: 86.8, a: 2.0, b: 1.4, t: 98.4)

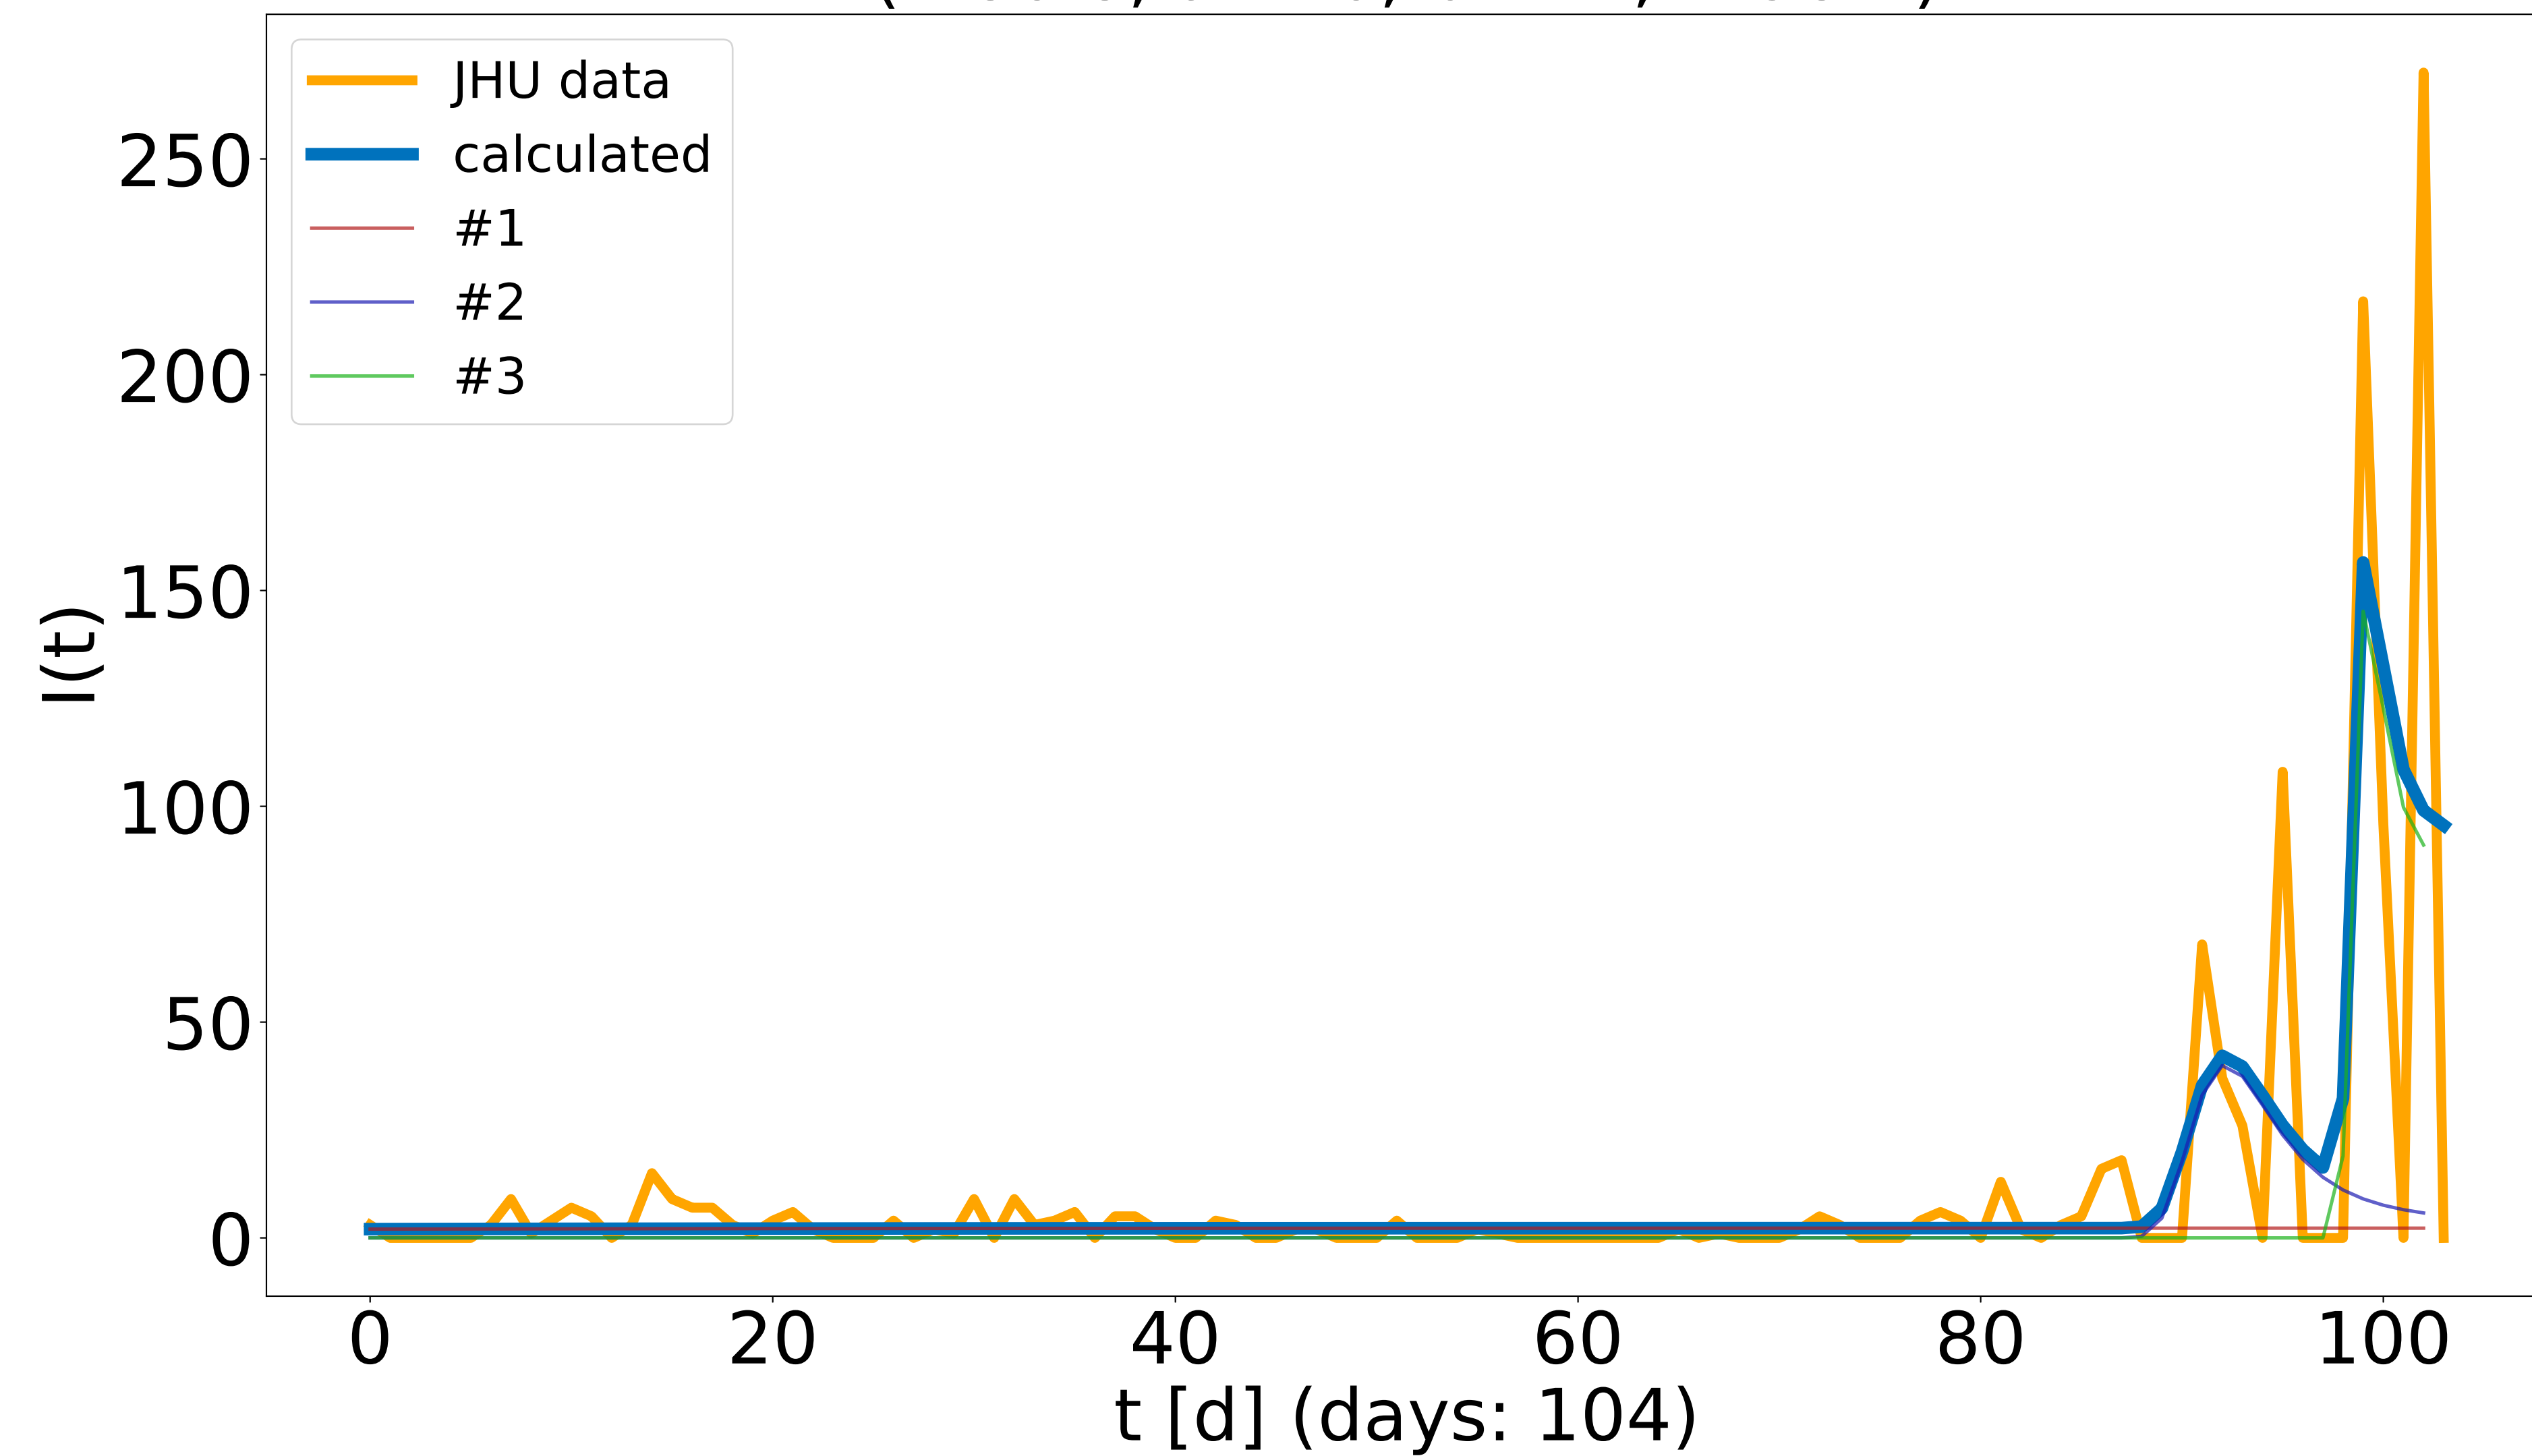

Victoria, Texas, US, Victoria ( $R^2 = 0.975$ )  
(i: 1.2, a: 0.678, b: 0.191, t: 26.1)  
(i: 0.1, a: 0.783, b: 0.049, t: 77.7)  
(i: 0.1, a: 1.857, b: 0.105, t: 92.7)

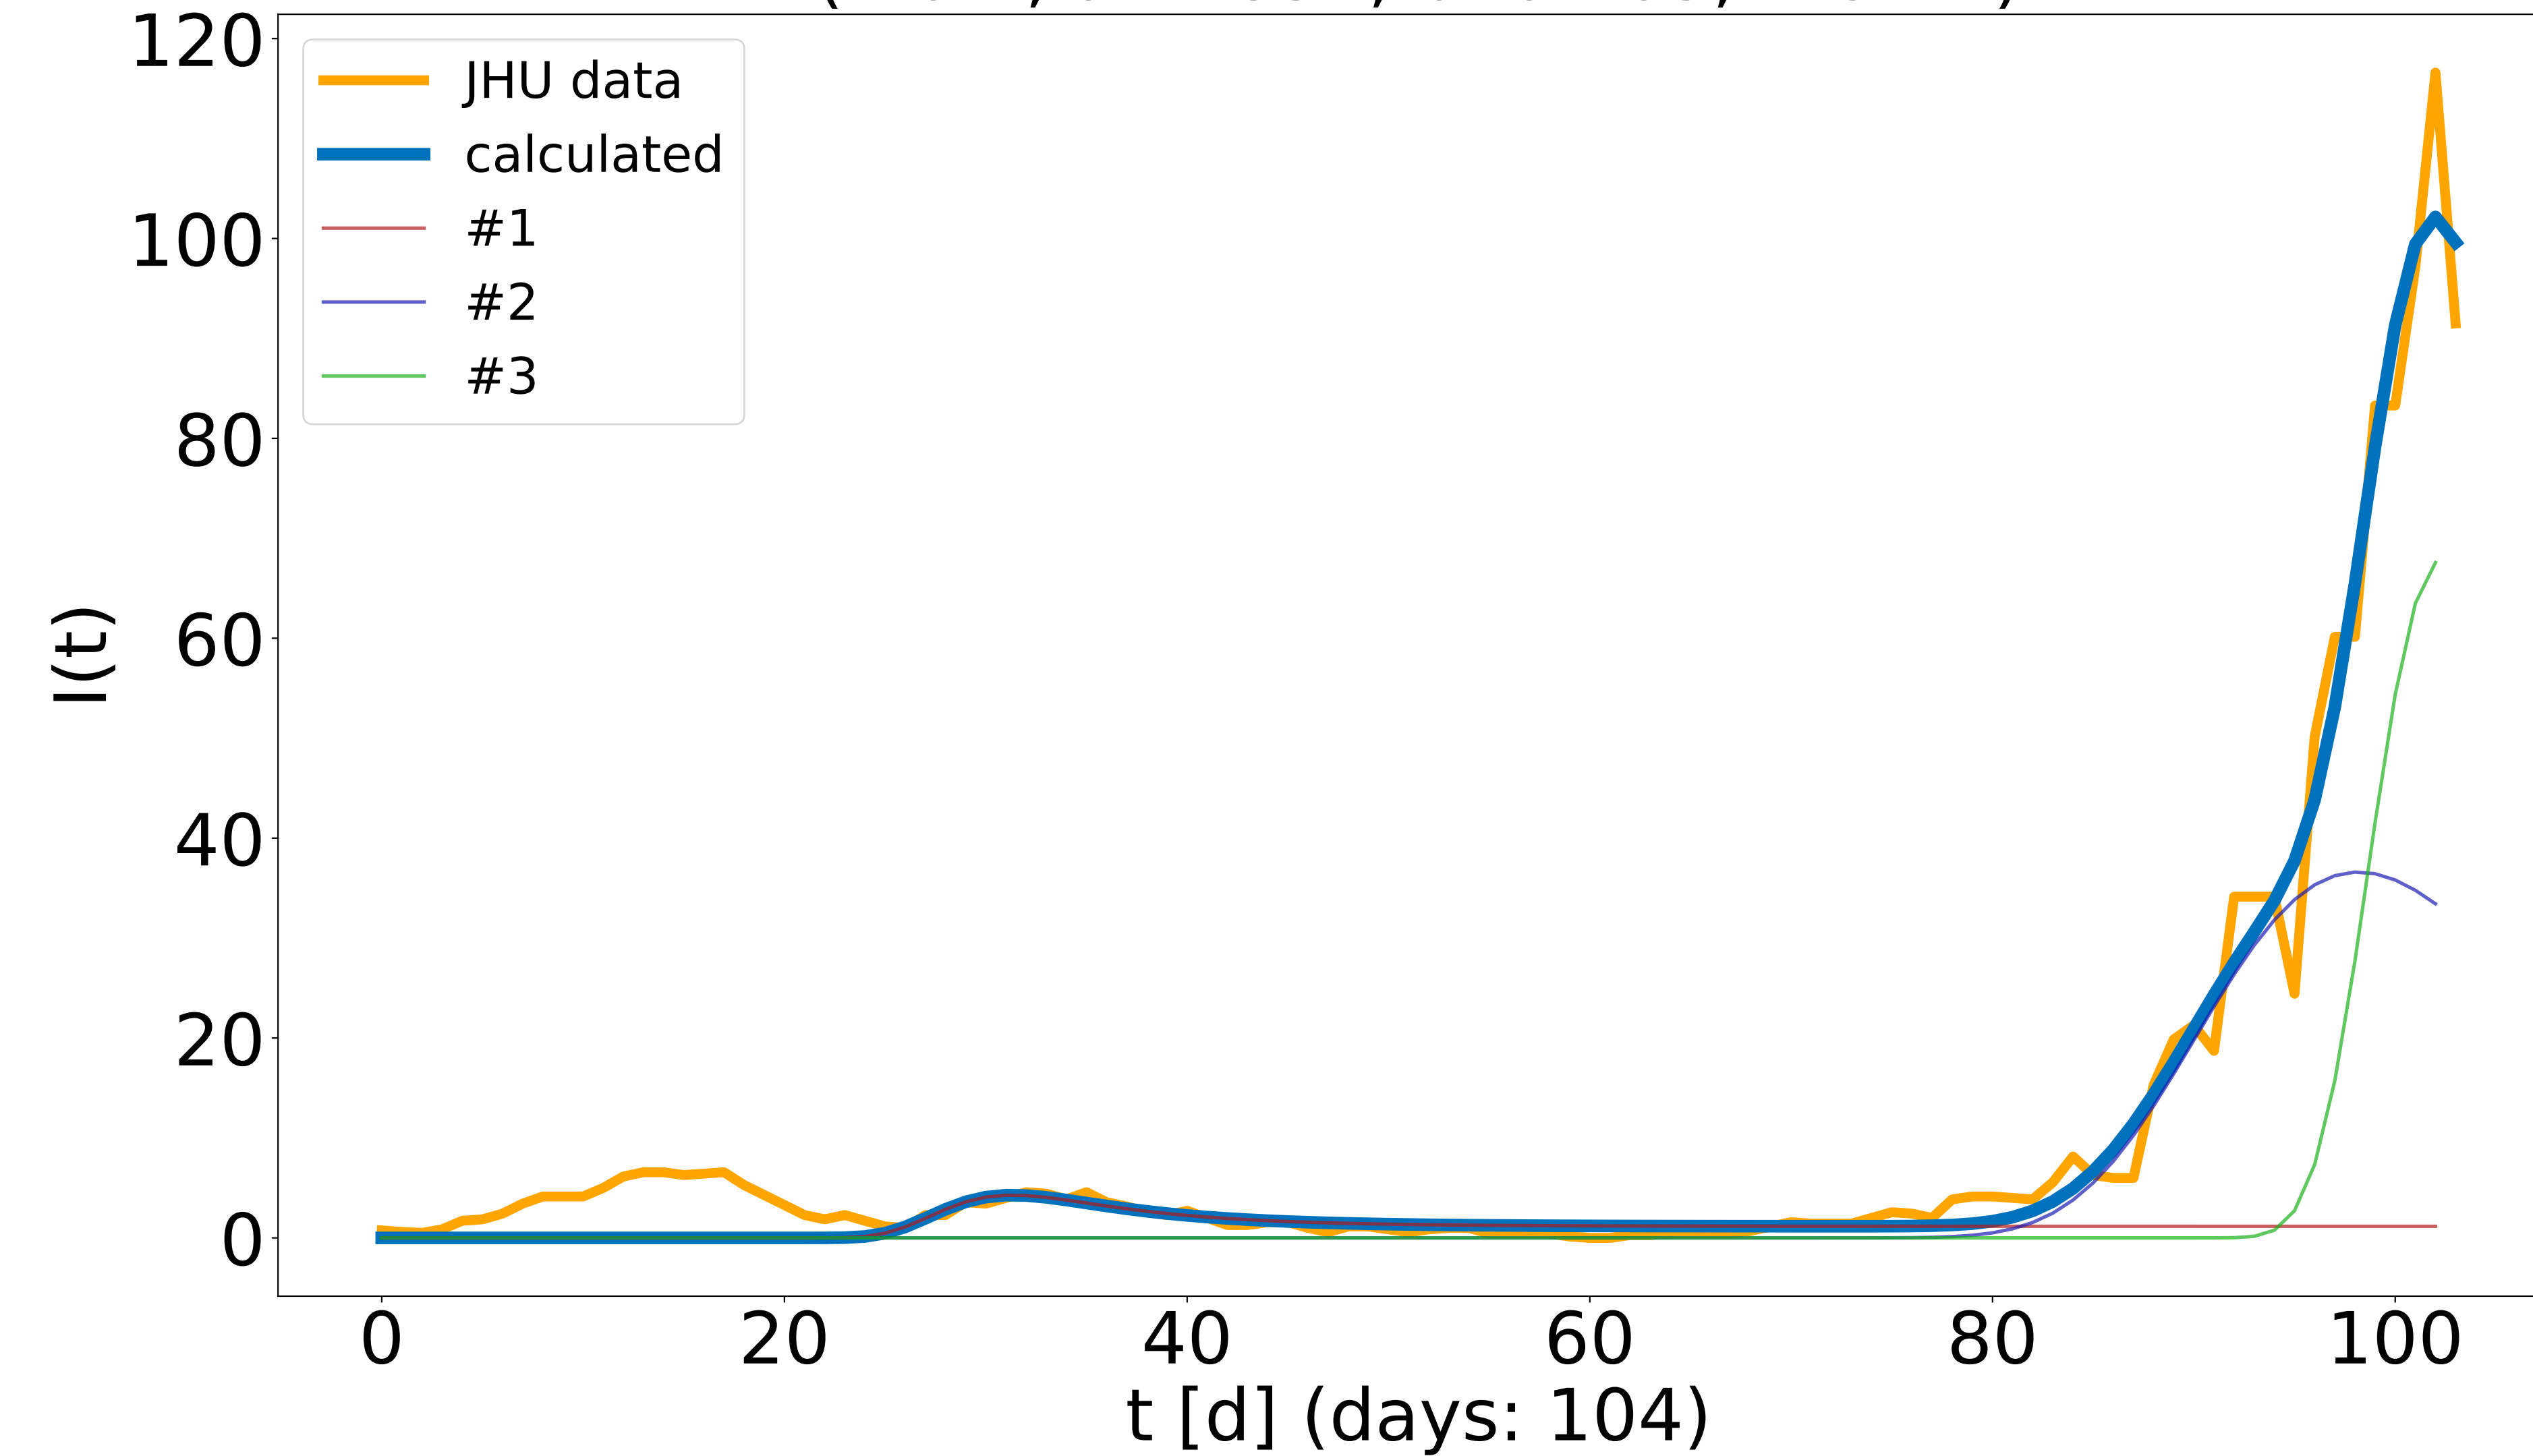

Webb, Texas, US, Webb ( $R^2 = 0.68$ )  
(i: 4.9, a: 0.228, b: 0.085, t: 10.8)  
(i: 12.5, a: 2.0, b: 0.455, t: 100.8)  
(i: 42.1, a: 0.004, b: 0.101, t: 113.2)

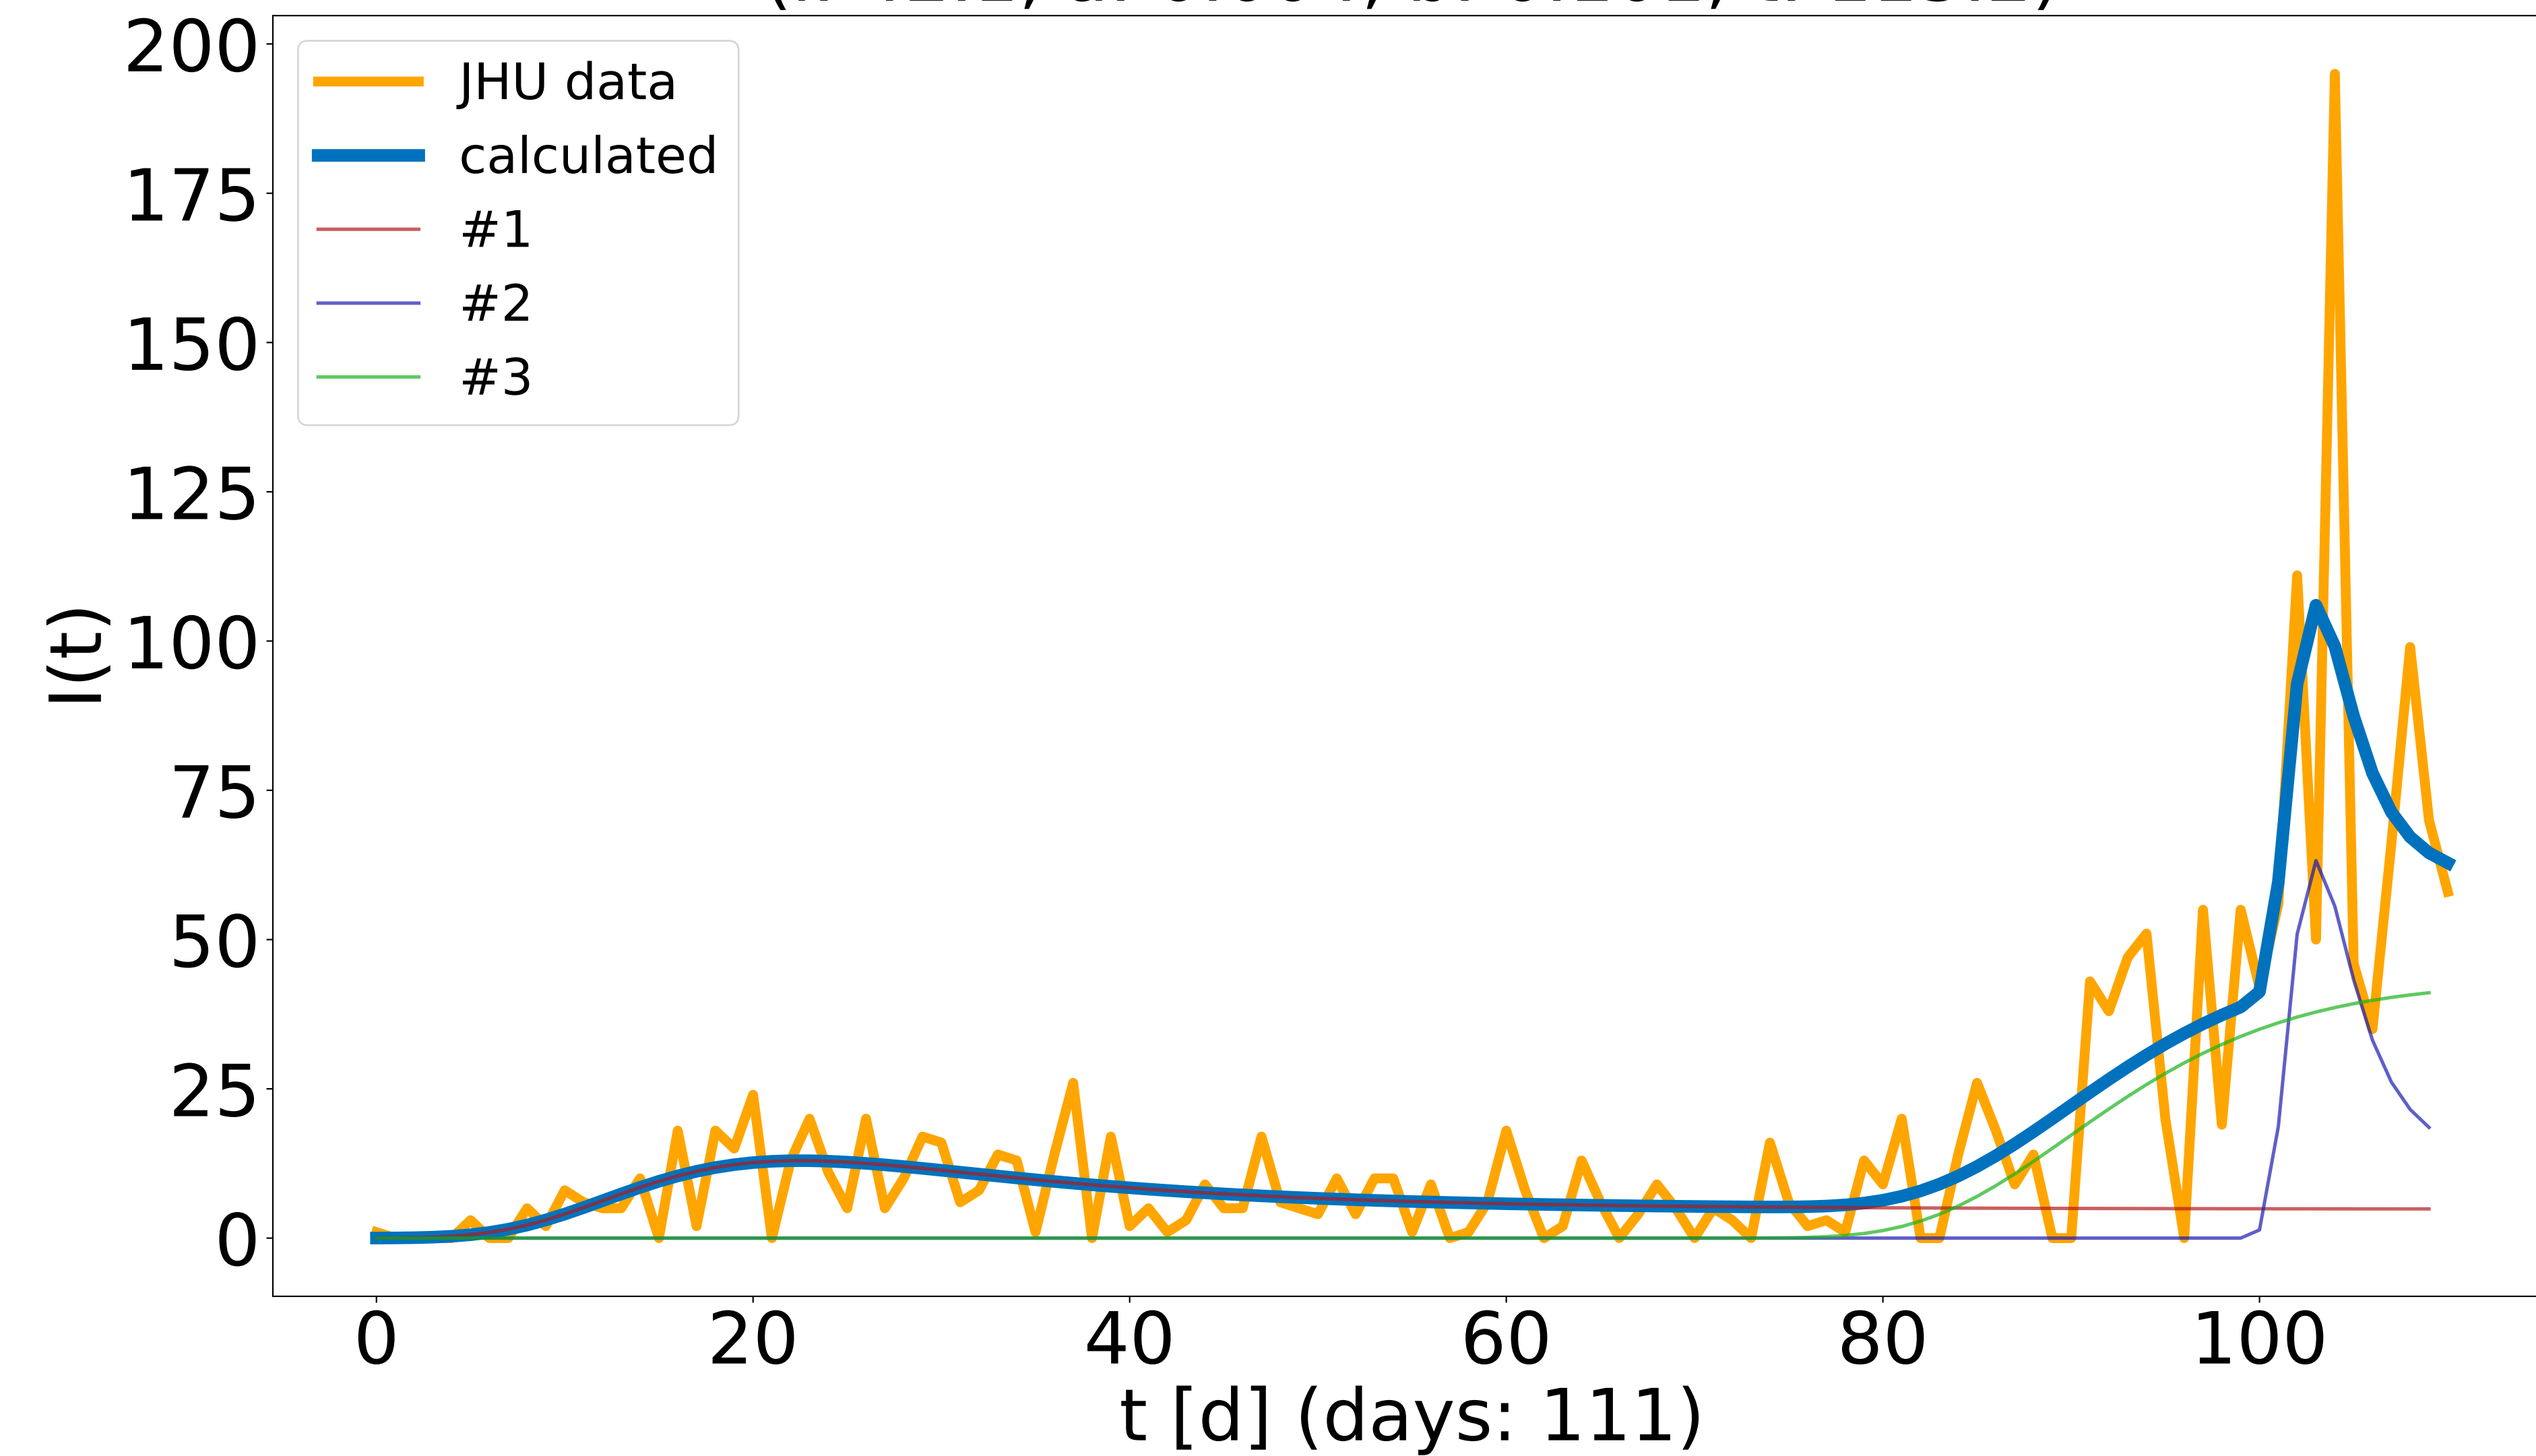

Webb, Texas, US, Webb ( $R^2 = 0.99$ )  
(i: 4.8, a: 0.218, b: 0.083, t: 10.6)  
(i: 0.1, a: 0.601, b: 0.038, t: 74.4)  
(i: 35.5, a: 0.269, b: 0.387, t: 101.2)

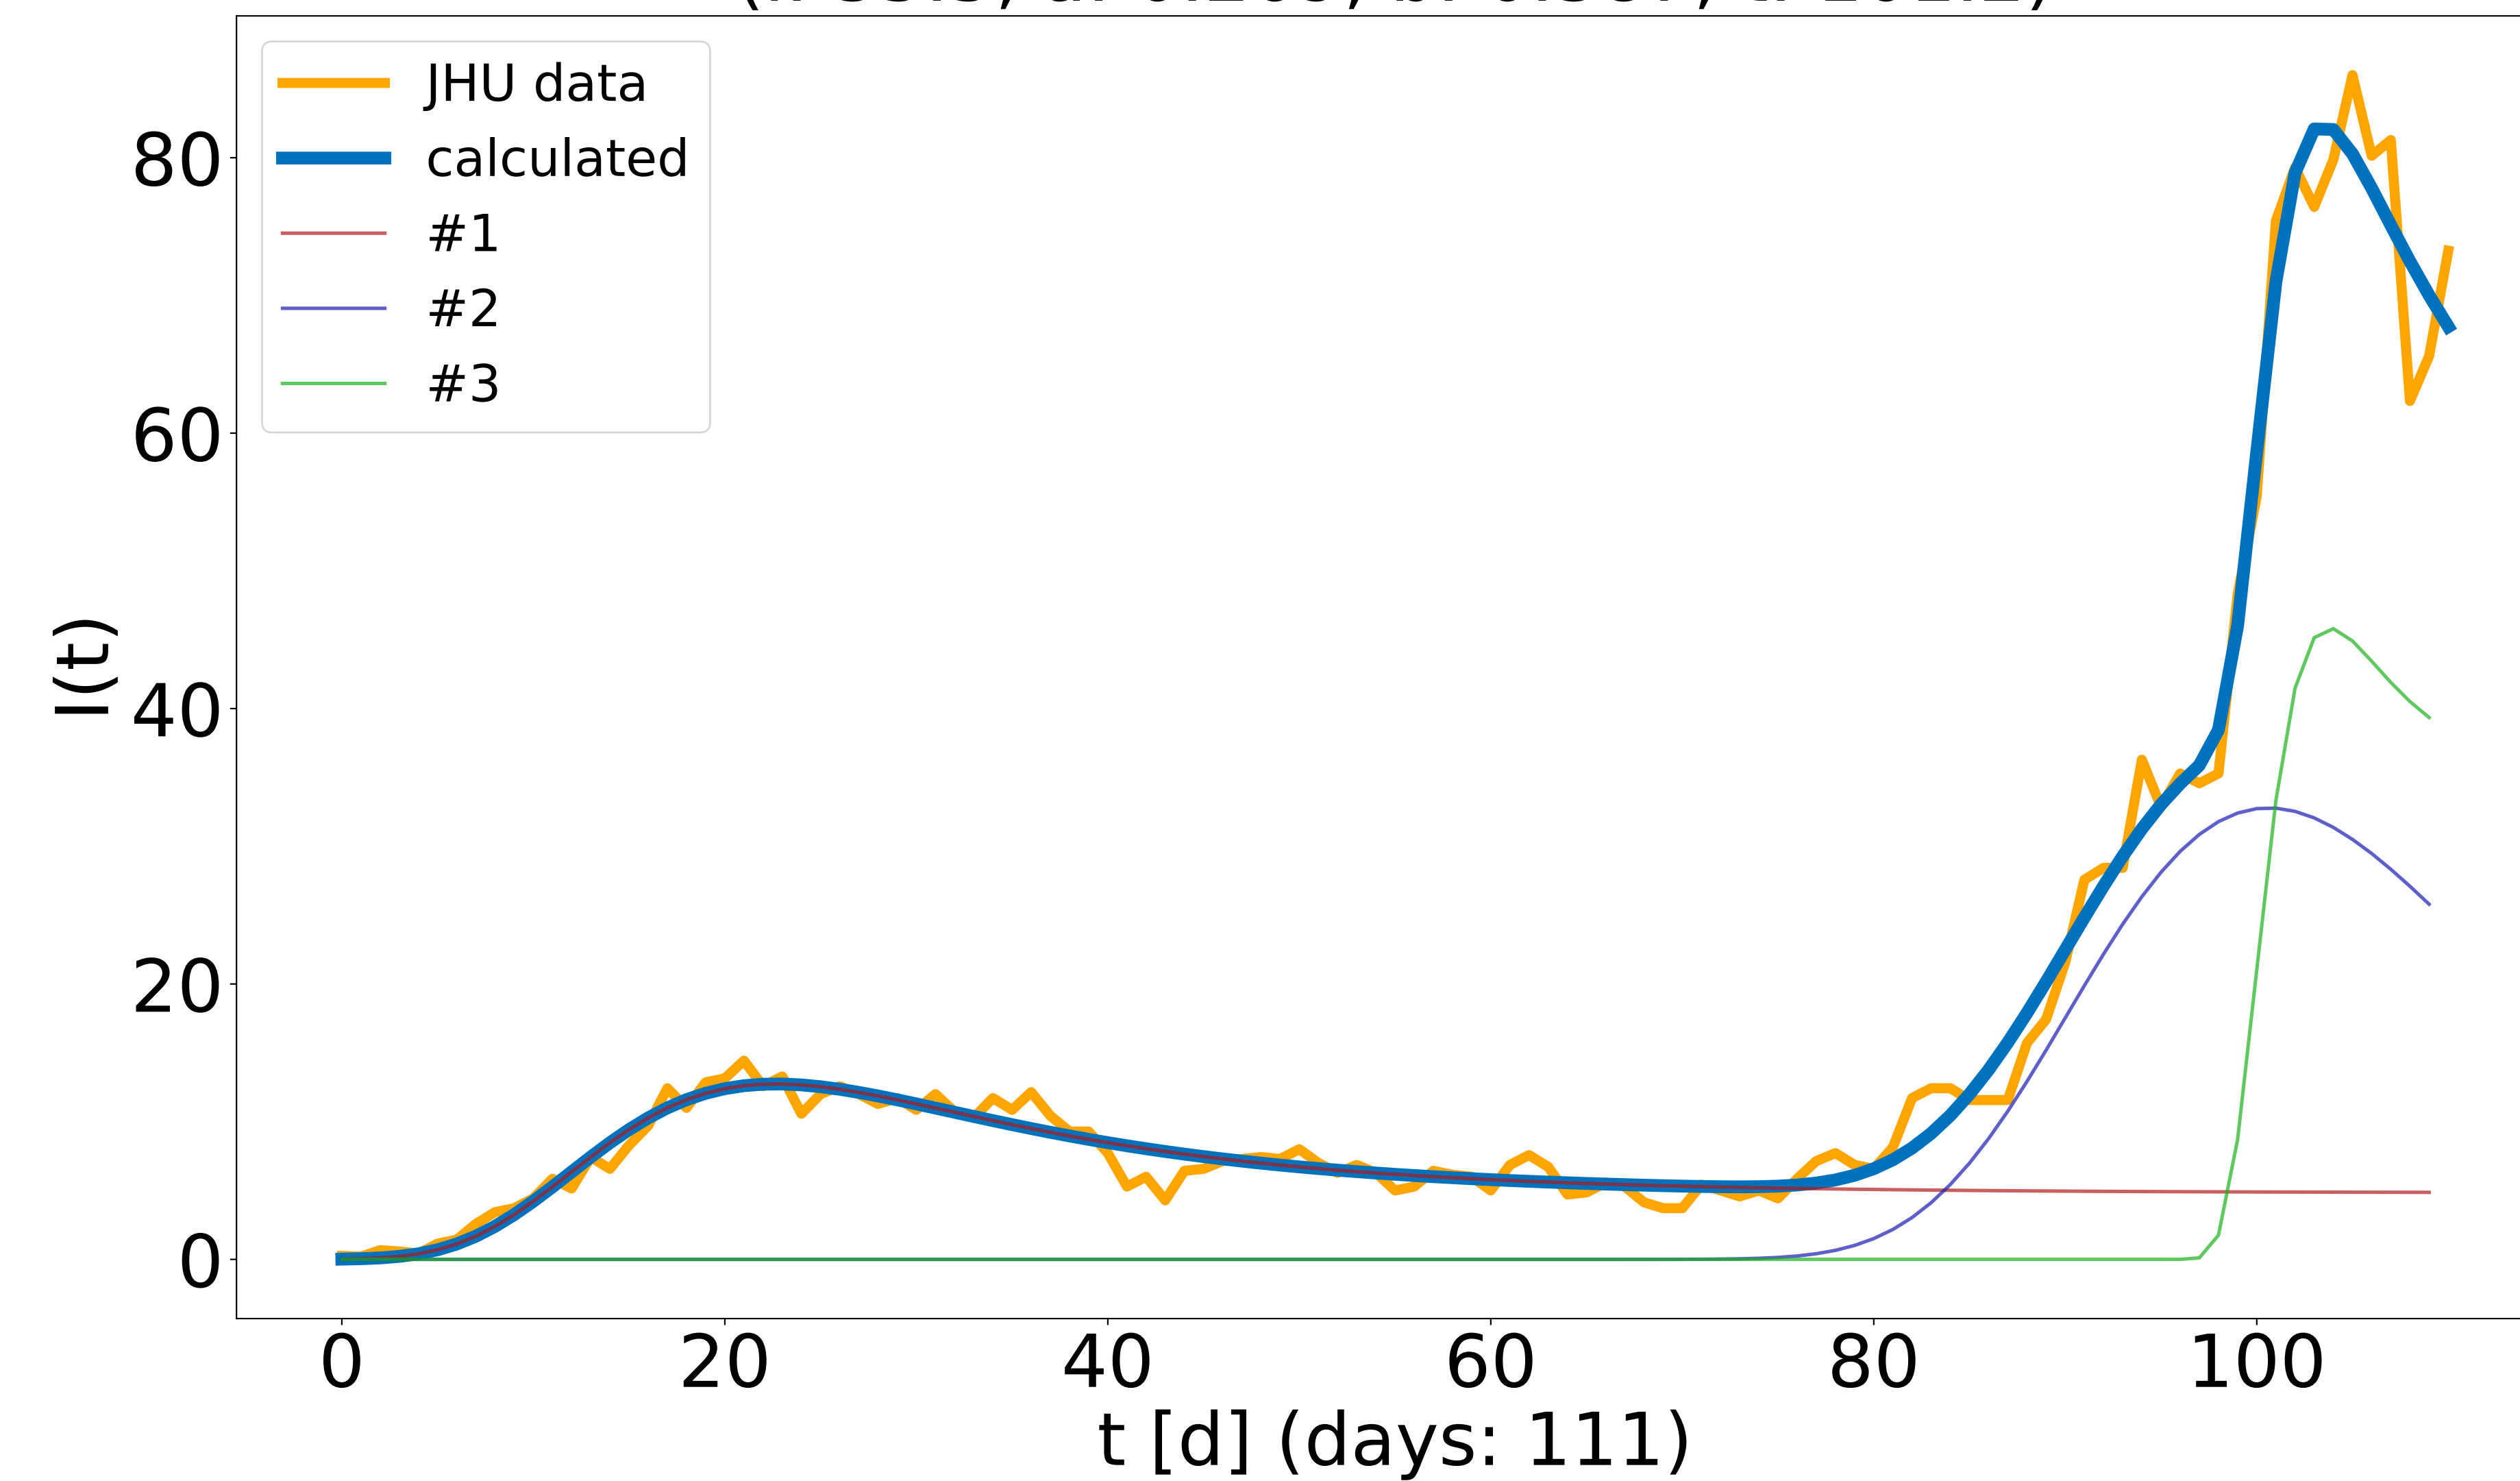



Williamson, Texas, US, Williamson ( $R^2 = 0.758$ )

(i: 2.4, a: 2.0, b: 0.799, t: 6.2)

(i: 7.6, a: 0.002, b: 1.4, t: 16.7)

(i: 0.1, a: 0.917, b: 0.05, t: 78.5)

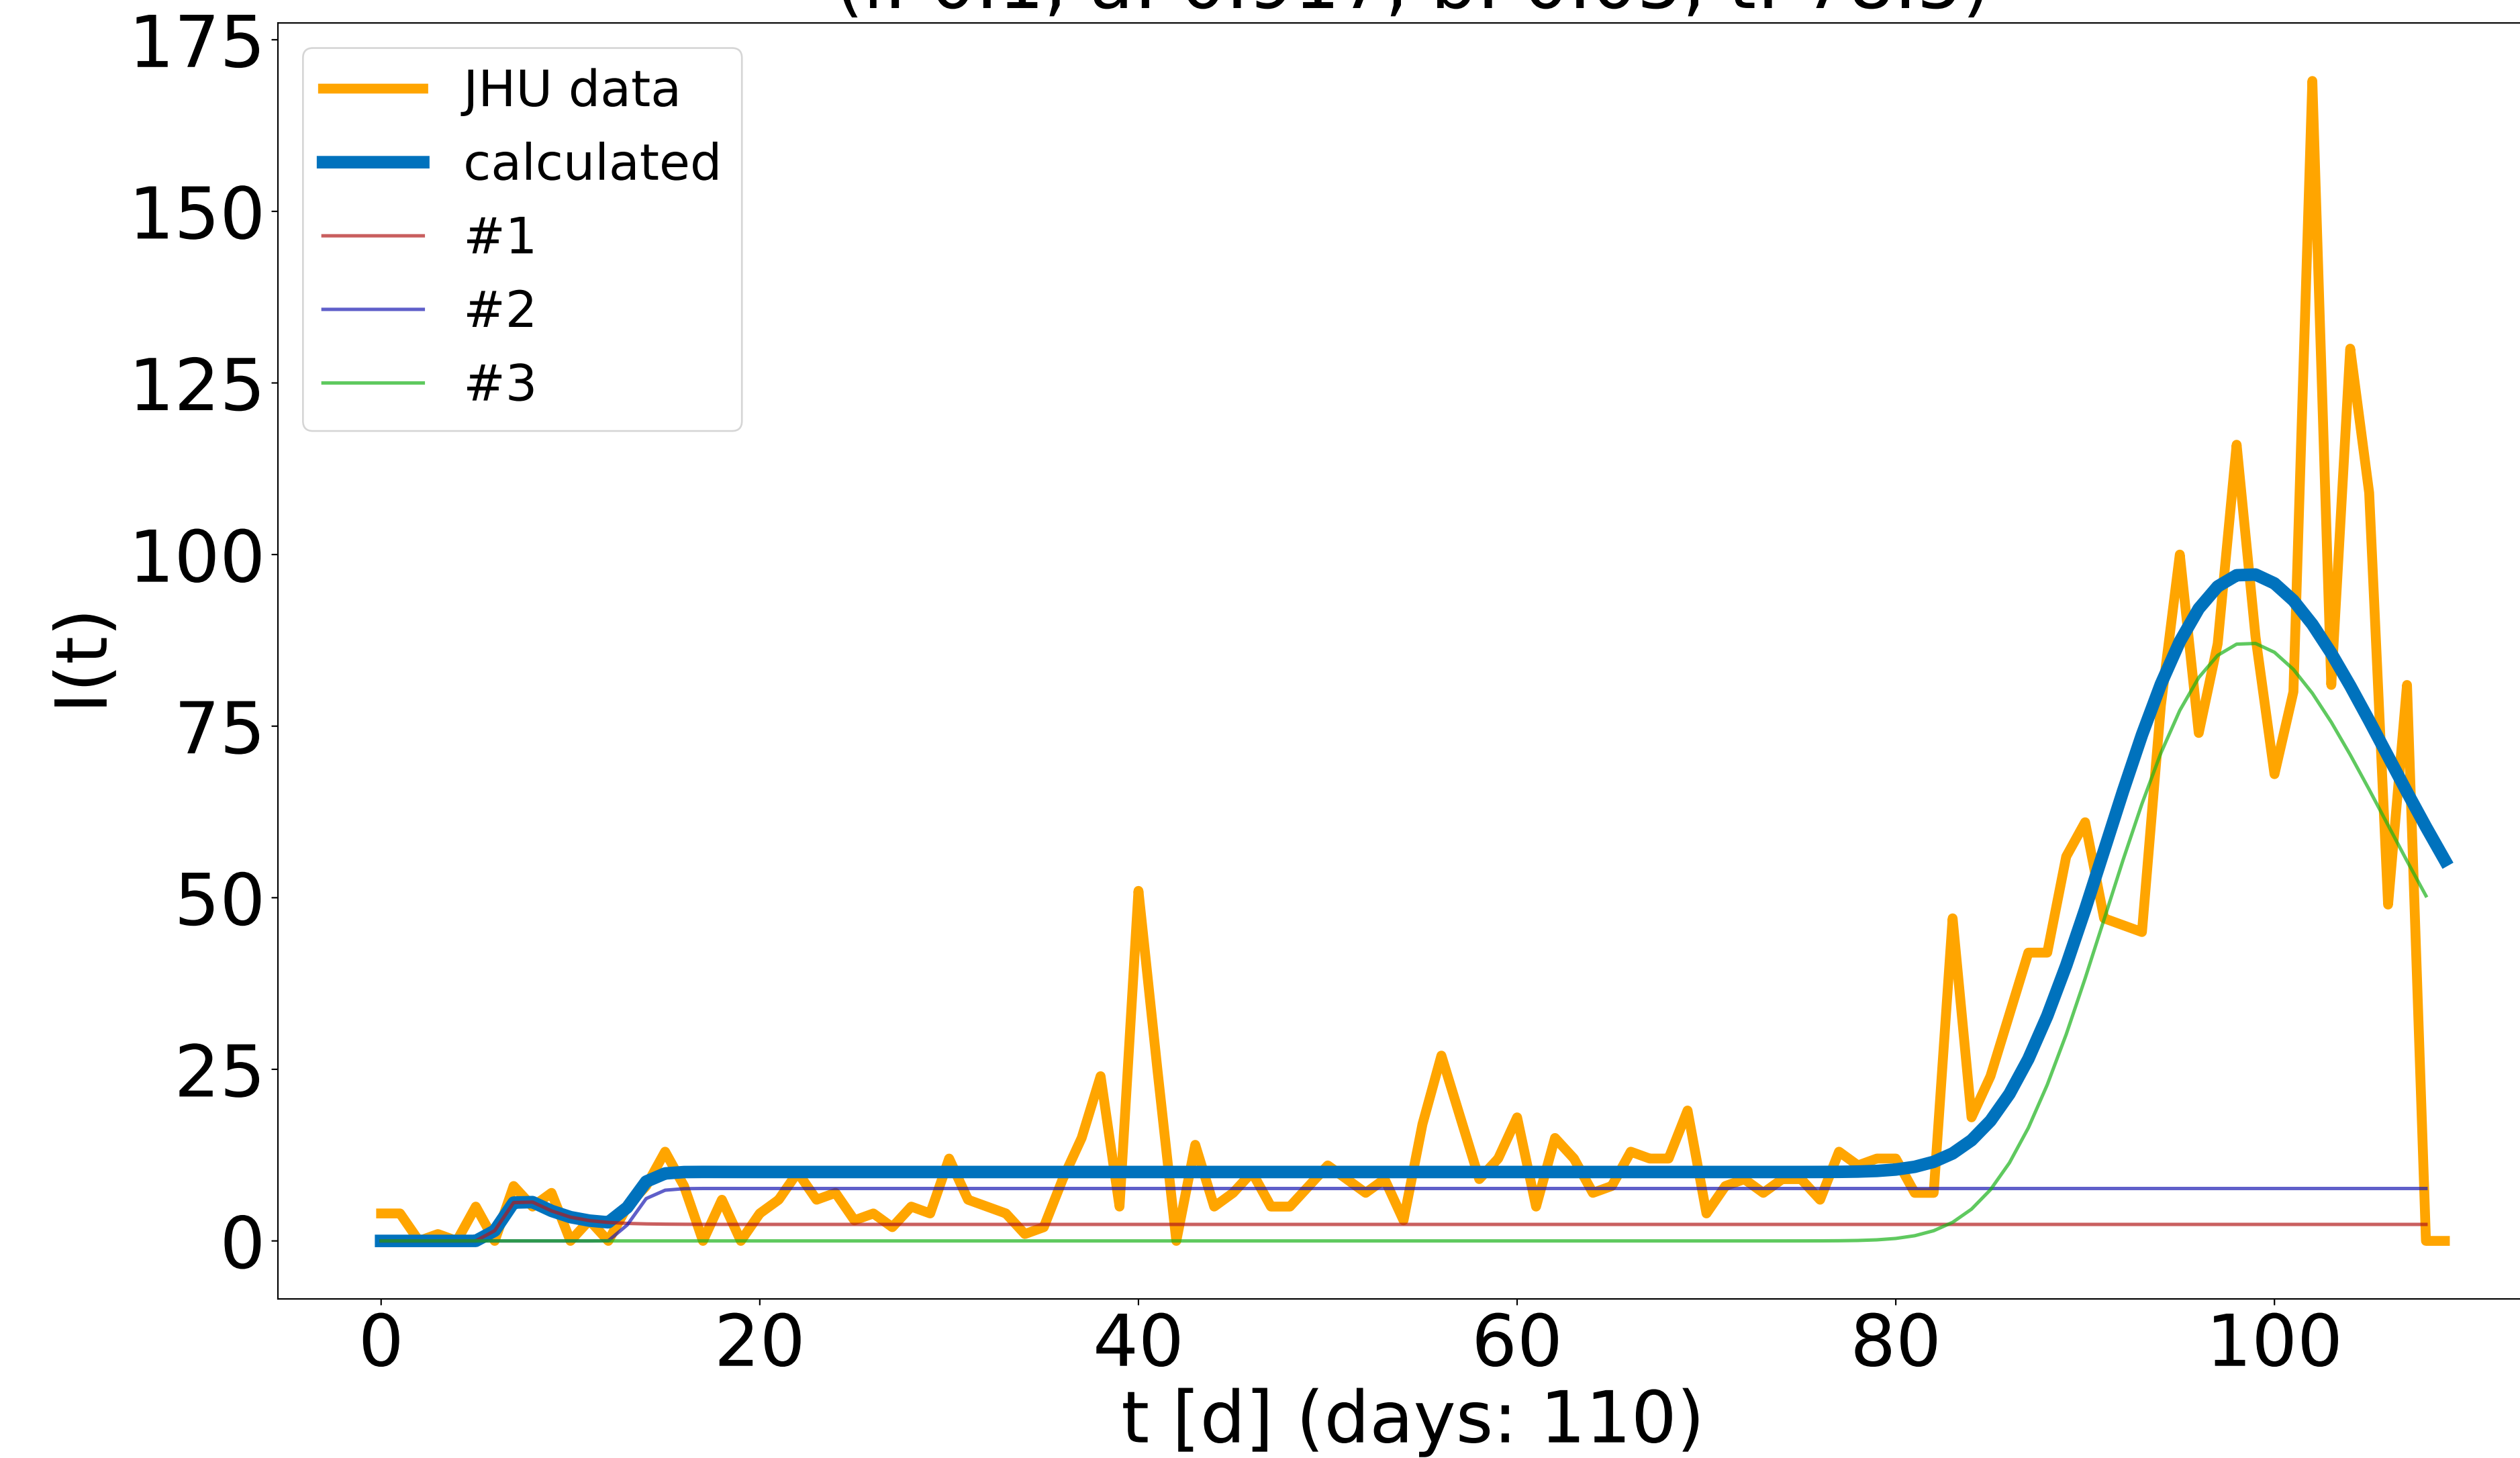

Williamson, Texas, US, Williamson ( $R^2 = 0.984$ )

(i: 1.1, a: 0.124, b: 0.019, t: 1.0)

(i: 0.1, a: 0.904, b: 0.053, t: 75.1)

(i: 0.1, a: 1.635, b: 0.094, t: 91.0)

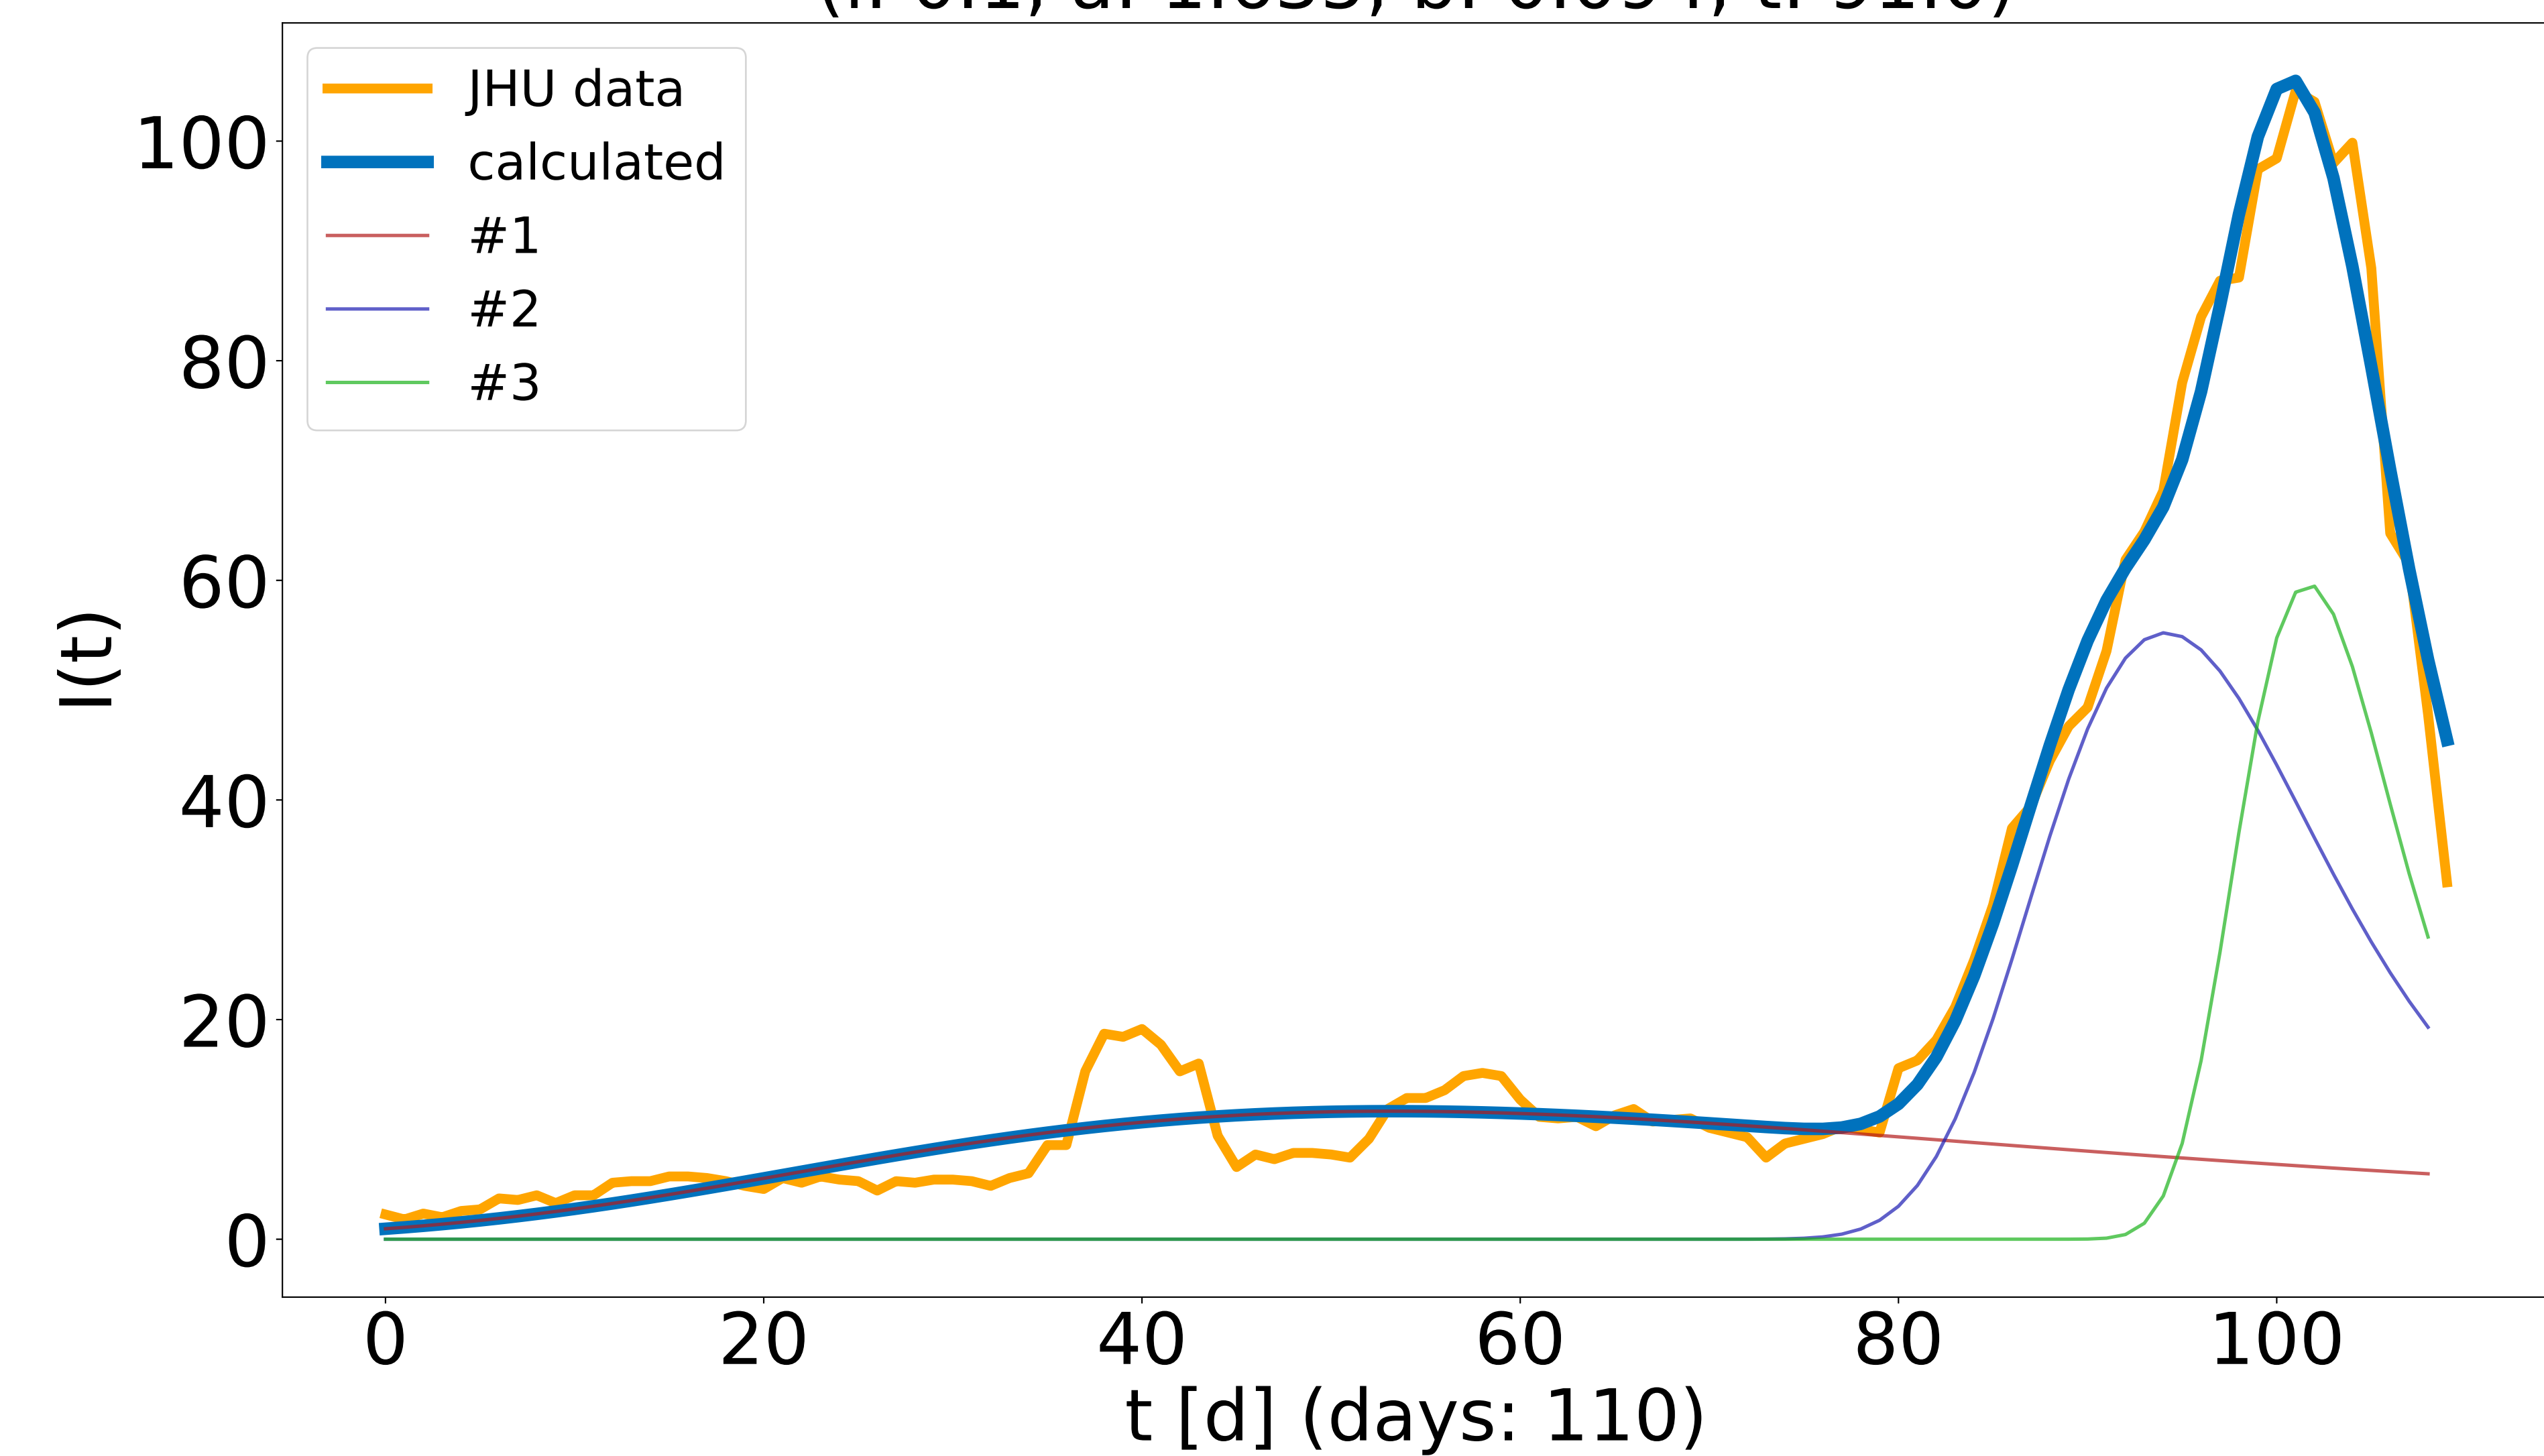

Utah, Utah, US, Utah ( $R^2 = 0.818$ )  
(i: 14.4, a: 2.0, b: 0.686, t: 14.4)  
(i: 9.8, a: 0.467, b: 0.133, t: 30.8)  
(i: 0.1, a: 0.371, b: 0.021, t: 57.4)

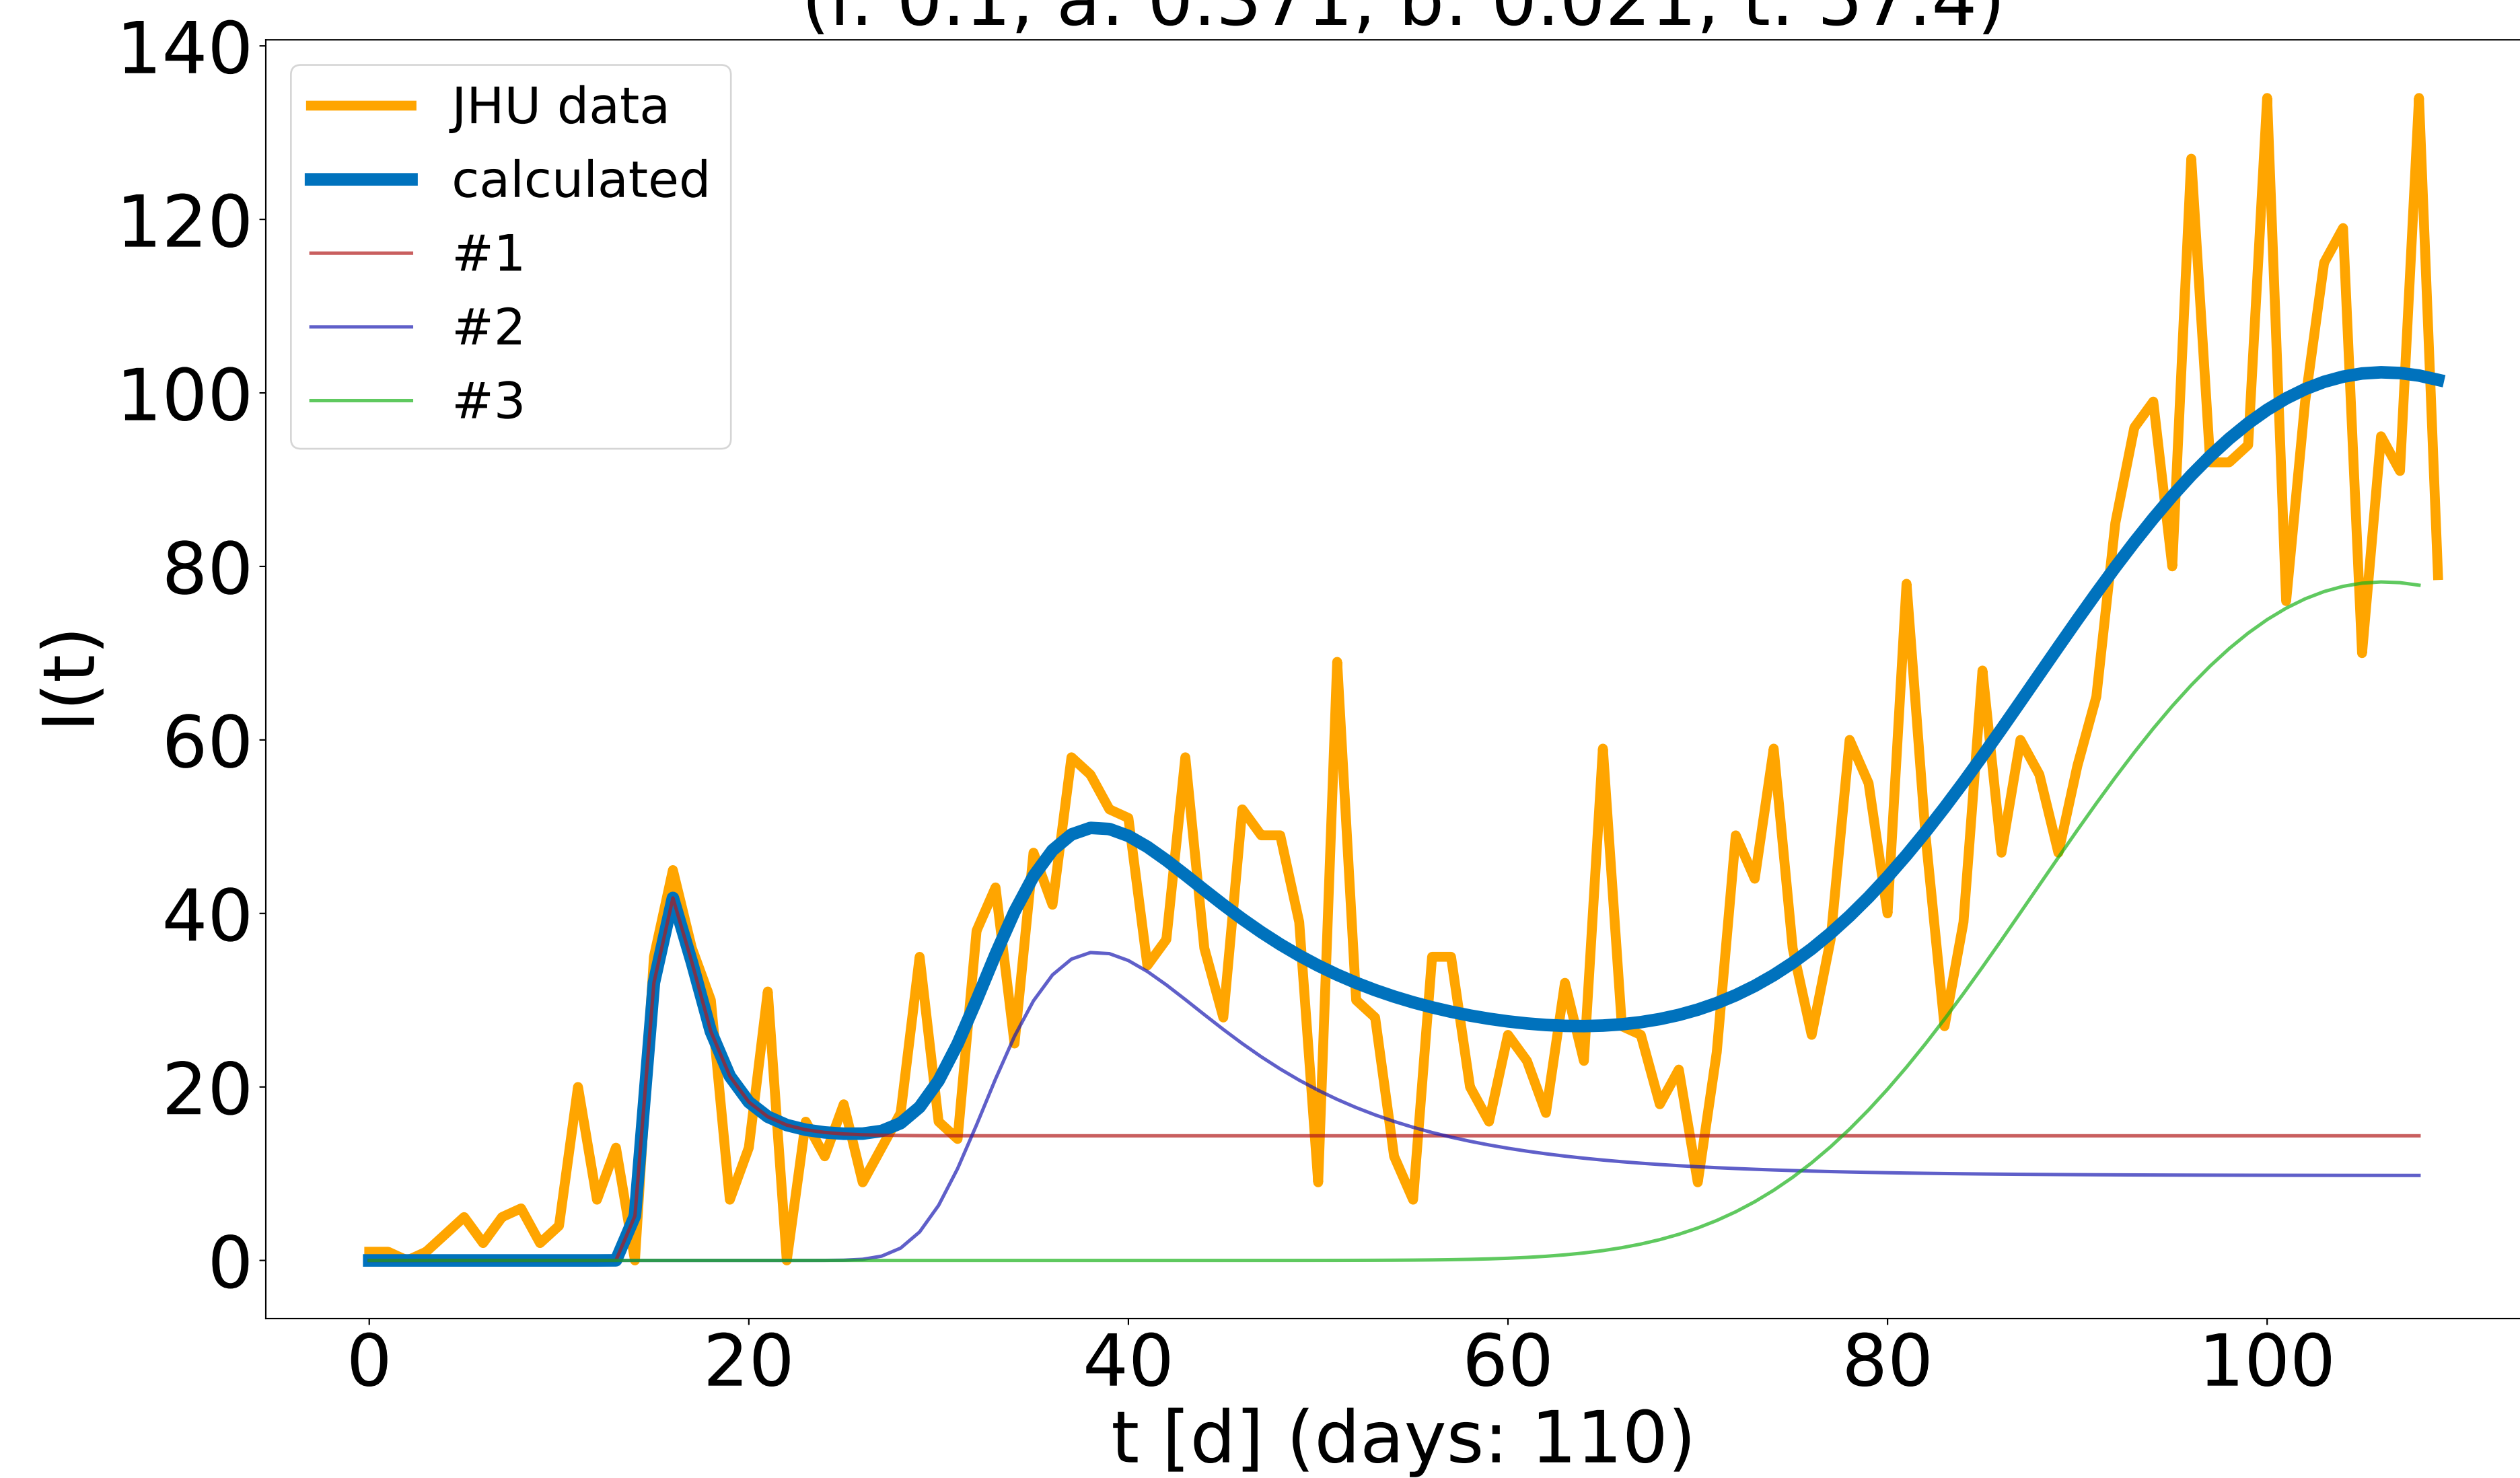

Utah, Utah, US, Utah ( $R^2 = 0.975$ )  
(i: 0.1, a: 1.124, b: 0.076, t: 3.6)  
(i: 20.5, a: 0.253, b: 0.116, t: 30.5)  
(i: 0.1, a: 0.339, b: 0.019, t: 53.6)

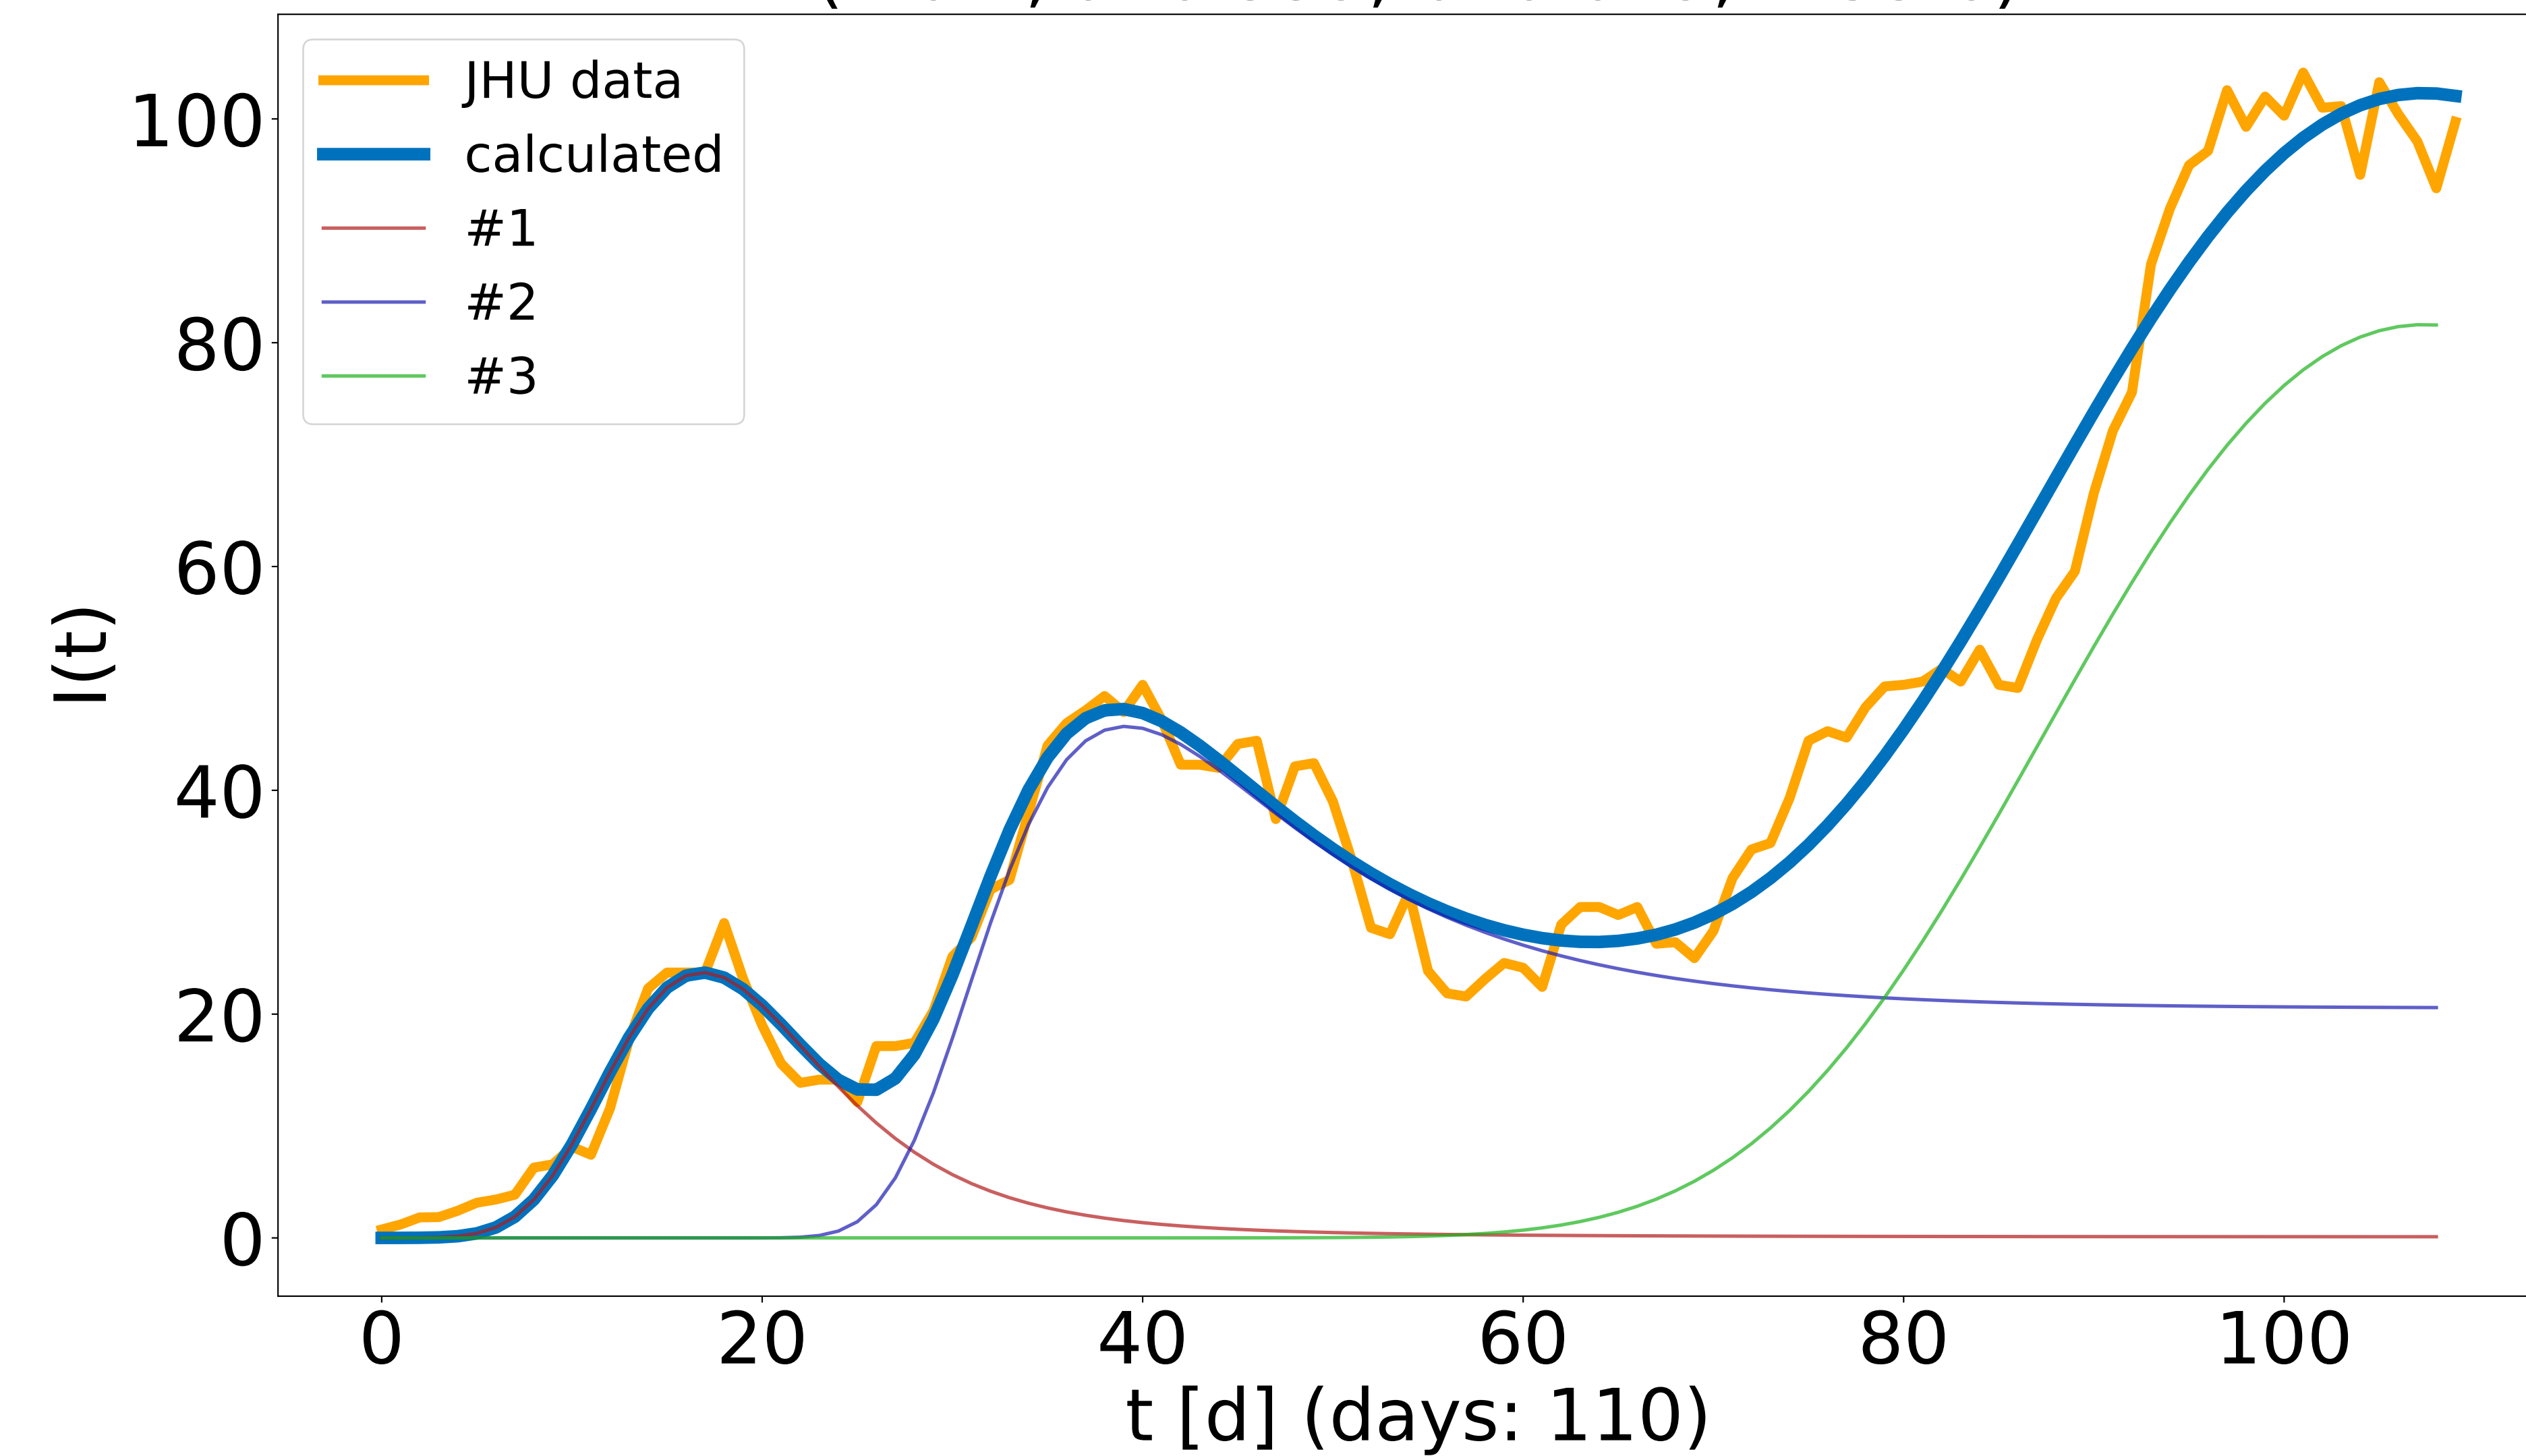

Spokane, Washington, US, Spokane ( $R^2 = 0.421$ )

(i: 3.6, a: 0.741, b: 0.164, t: 8.2)

(i: 11.6, a: 0.429, b: 0.549, t: 69.7)

(i: 15.5, a: 1.475, b: 1.4, t: 83.4)

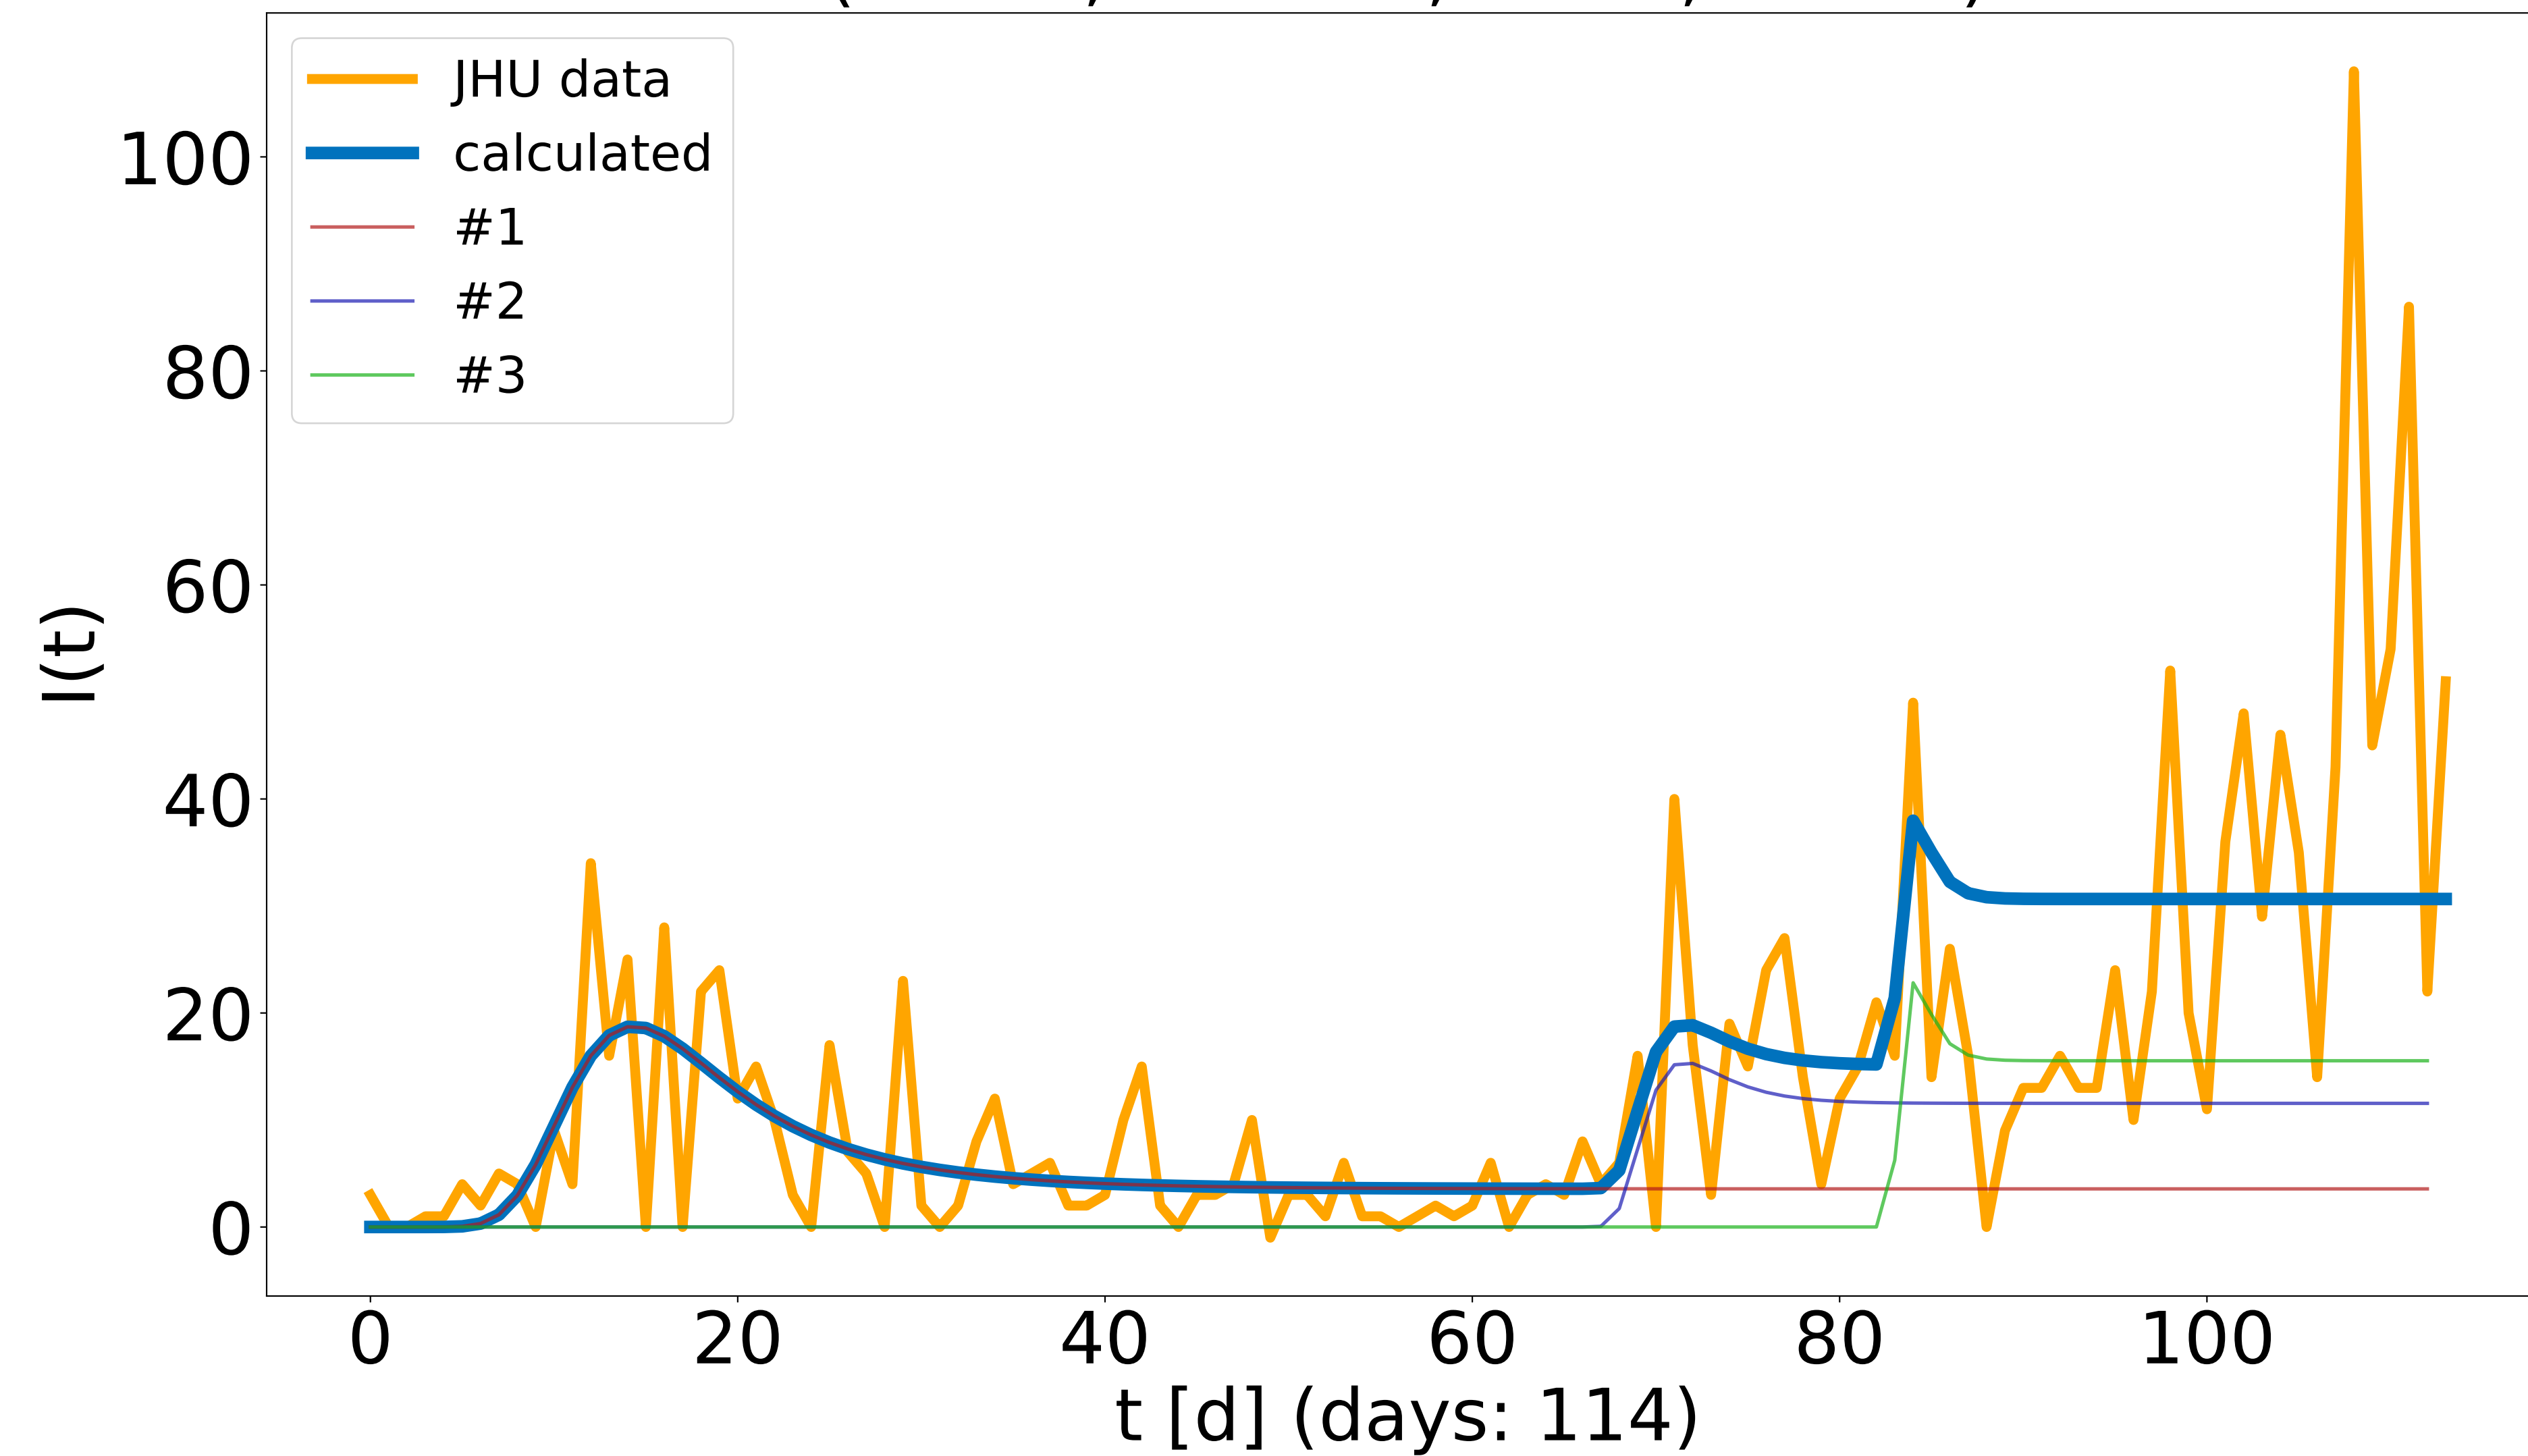

Spokane, Washington, US, Spokane ( $R^2 = 0.978$ )

(i: 2.6, a: 0.576, b: 0.116, t: 6.4)

(i: 6.4, a: 0.237, b: 0.096, t: 67.8)

(i: 0.1, a: 0.628, b: 0.038, t: 86.3)

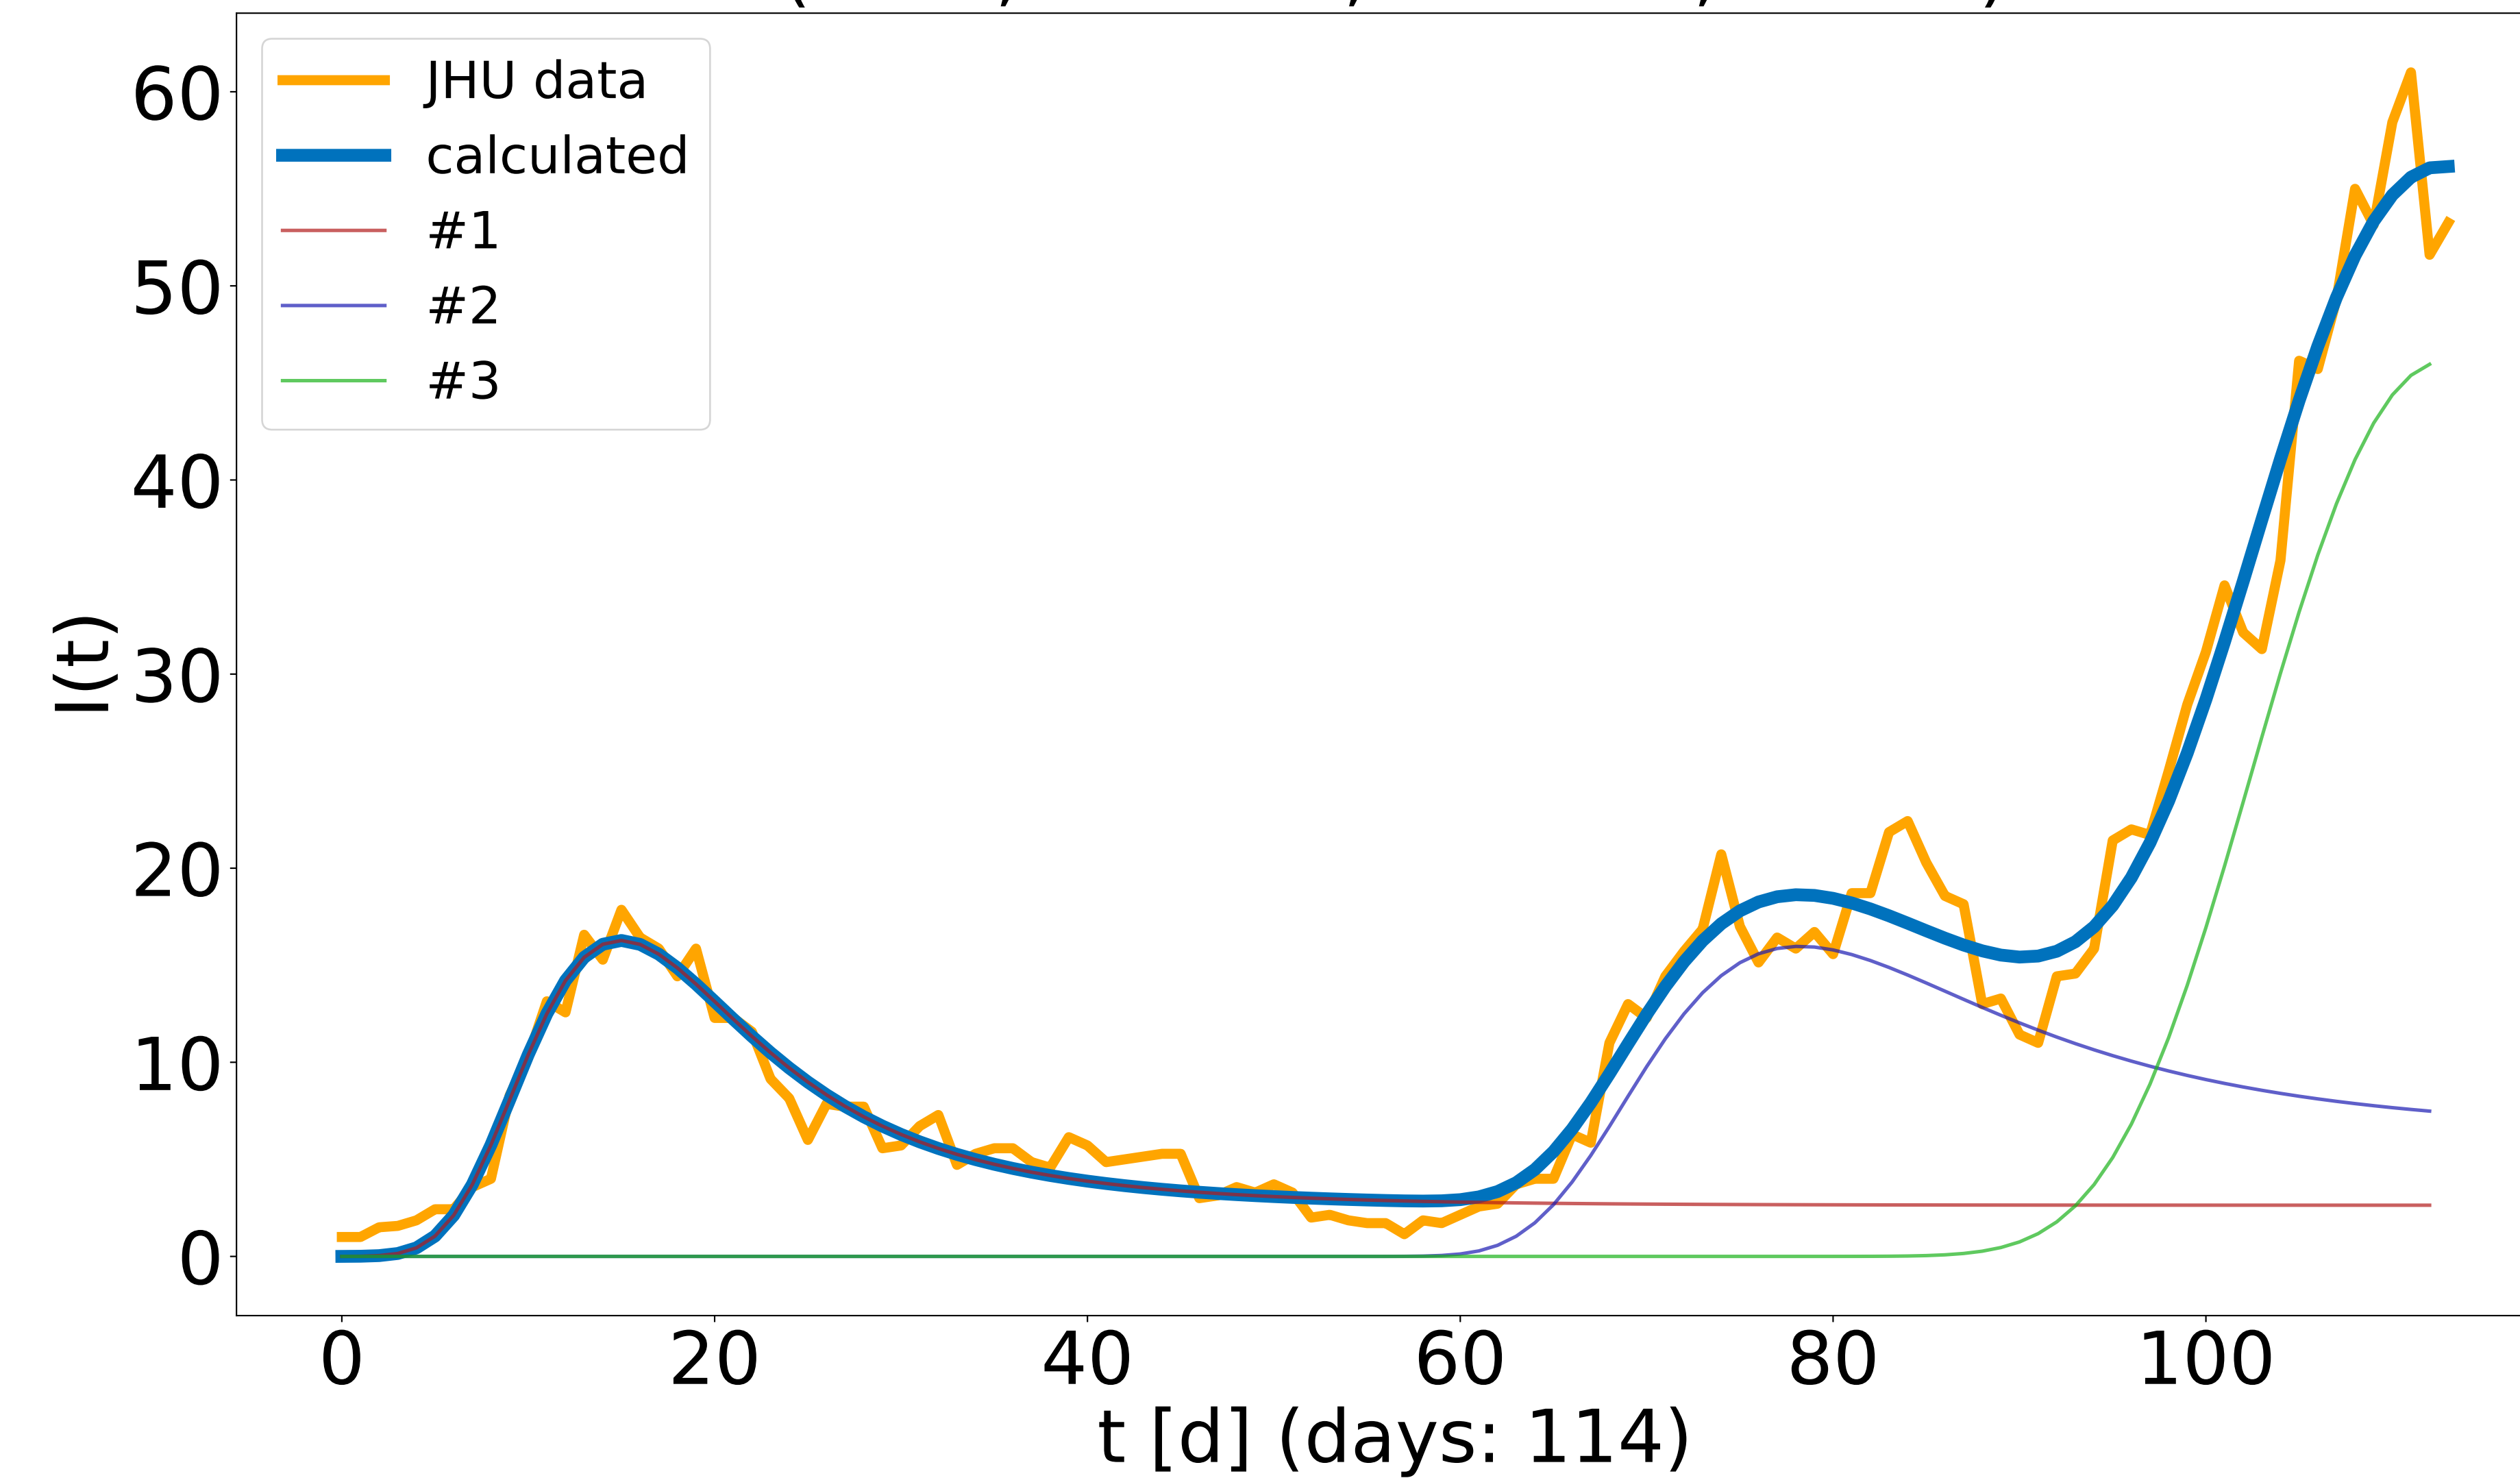

Brown, Wisconsin, US, Brown ( $R^2 = 0.772$ )  
(i: 0.1, a: 0.881, b: 0.048, t: 20.7)  
(i: 8.8, a: 0.001, b: 0.111, t: 46.9)  
(i: 21.9, a: 1.552, b: 1.151, t: 96.8)

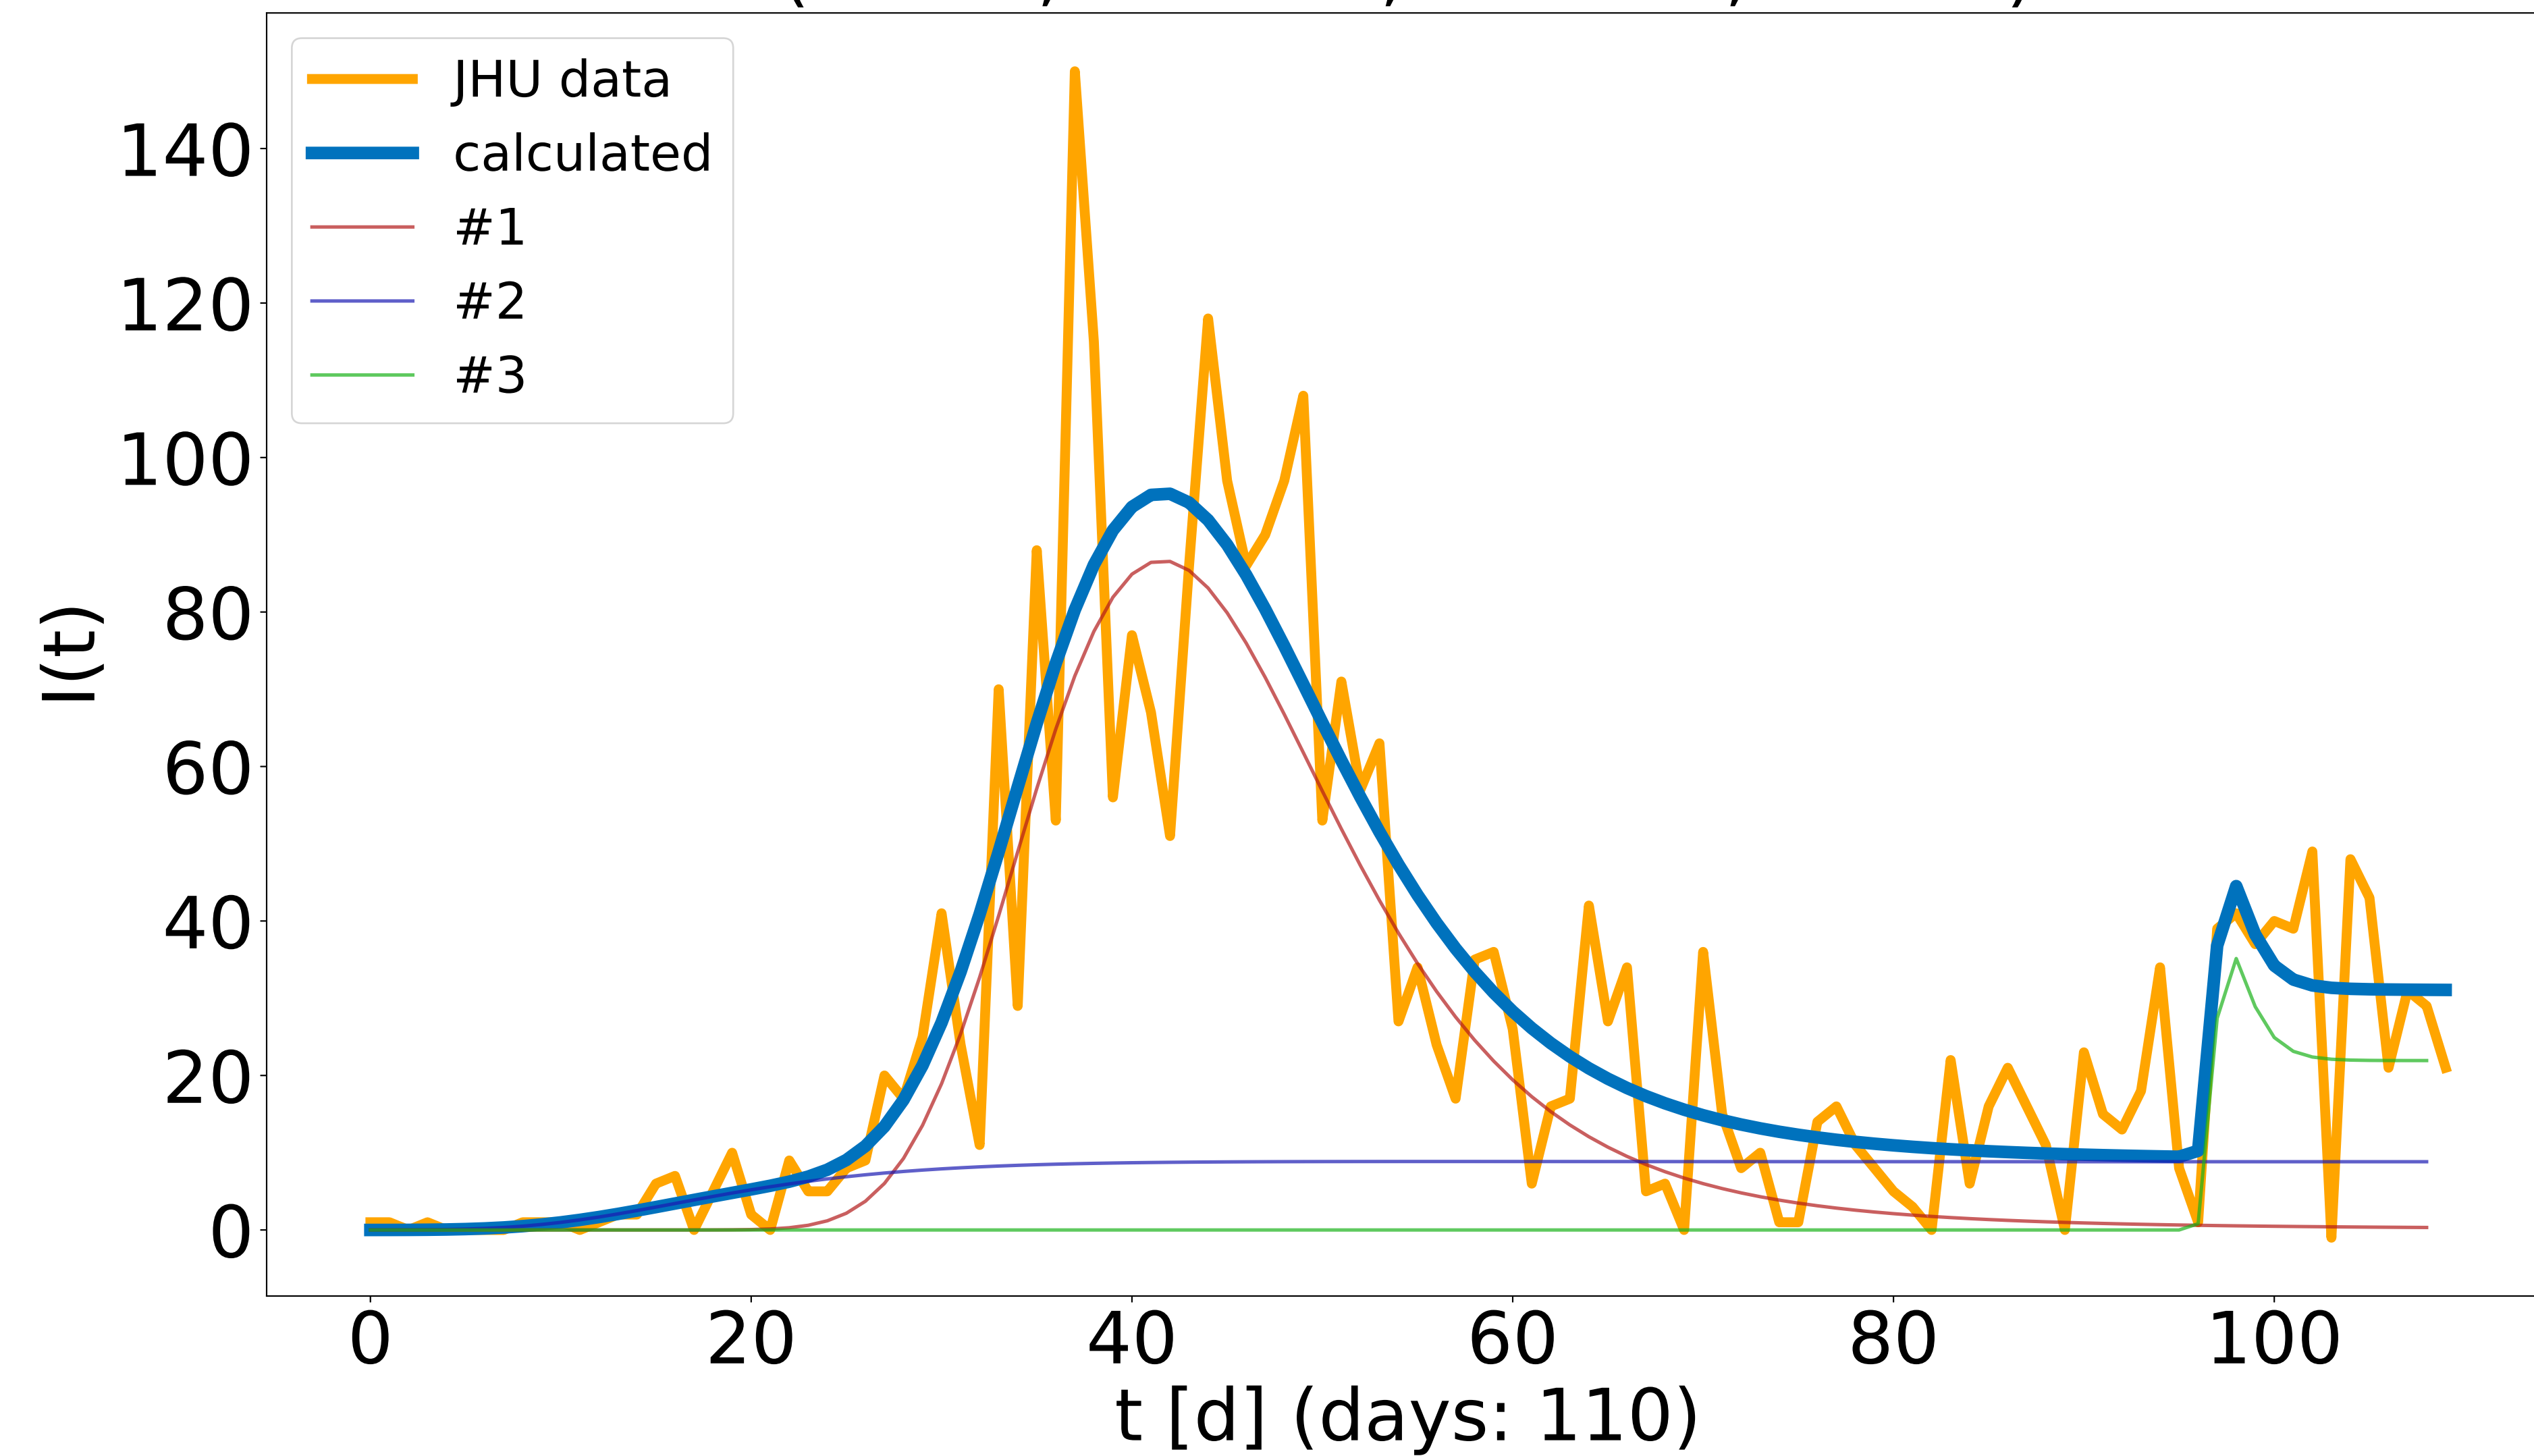

Brown, Wisconsin, US, Brown ( $R^2 = 0.987$ )  
(i: 0.1, a: 0.898, b: 0.049, t: 19.3)  
(i: 8.8, a: 1.089, b: 0.294, t: 43.9)  
(i: 0.1, a: 0.88, b: 0.058, t: 84.8)

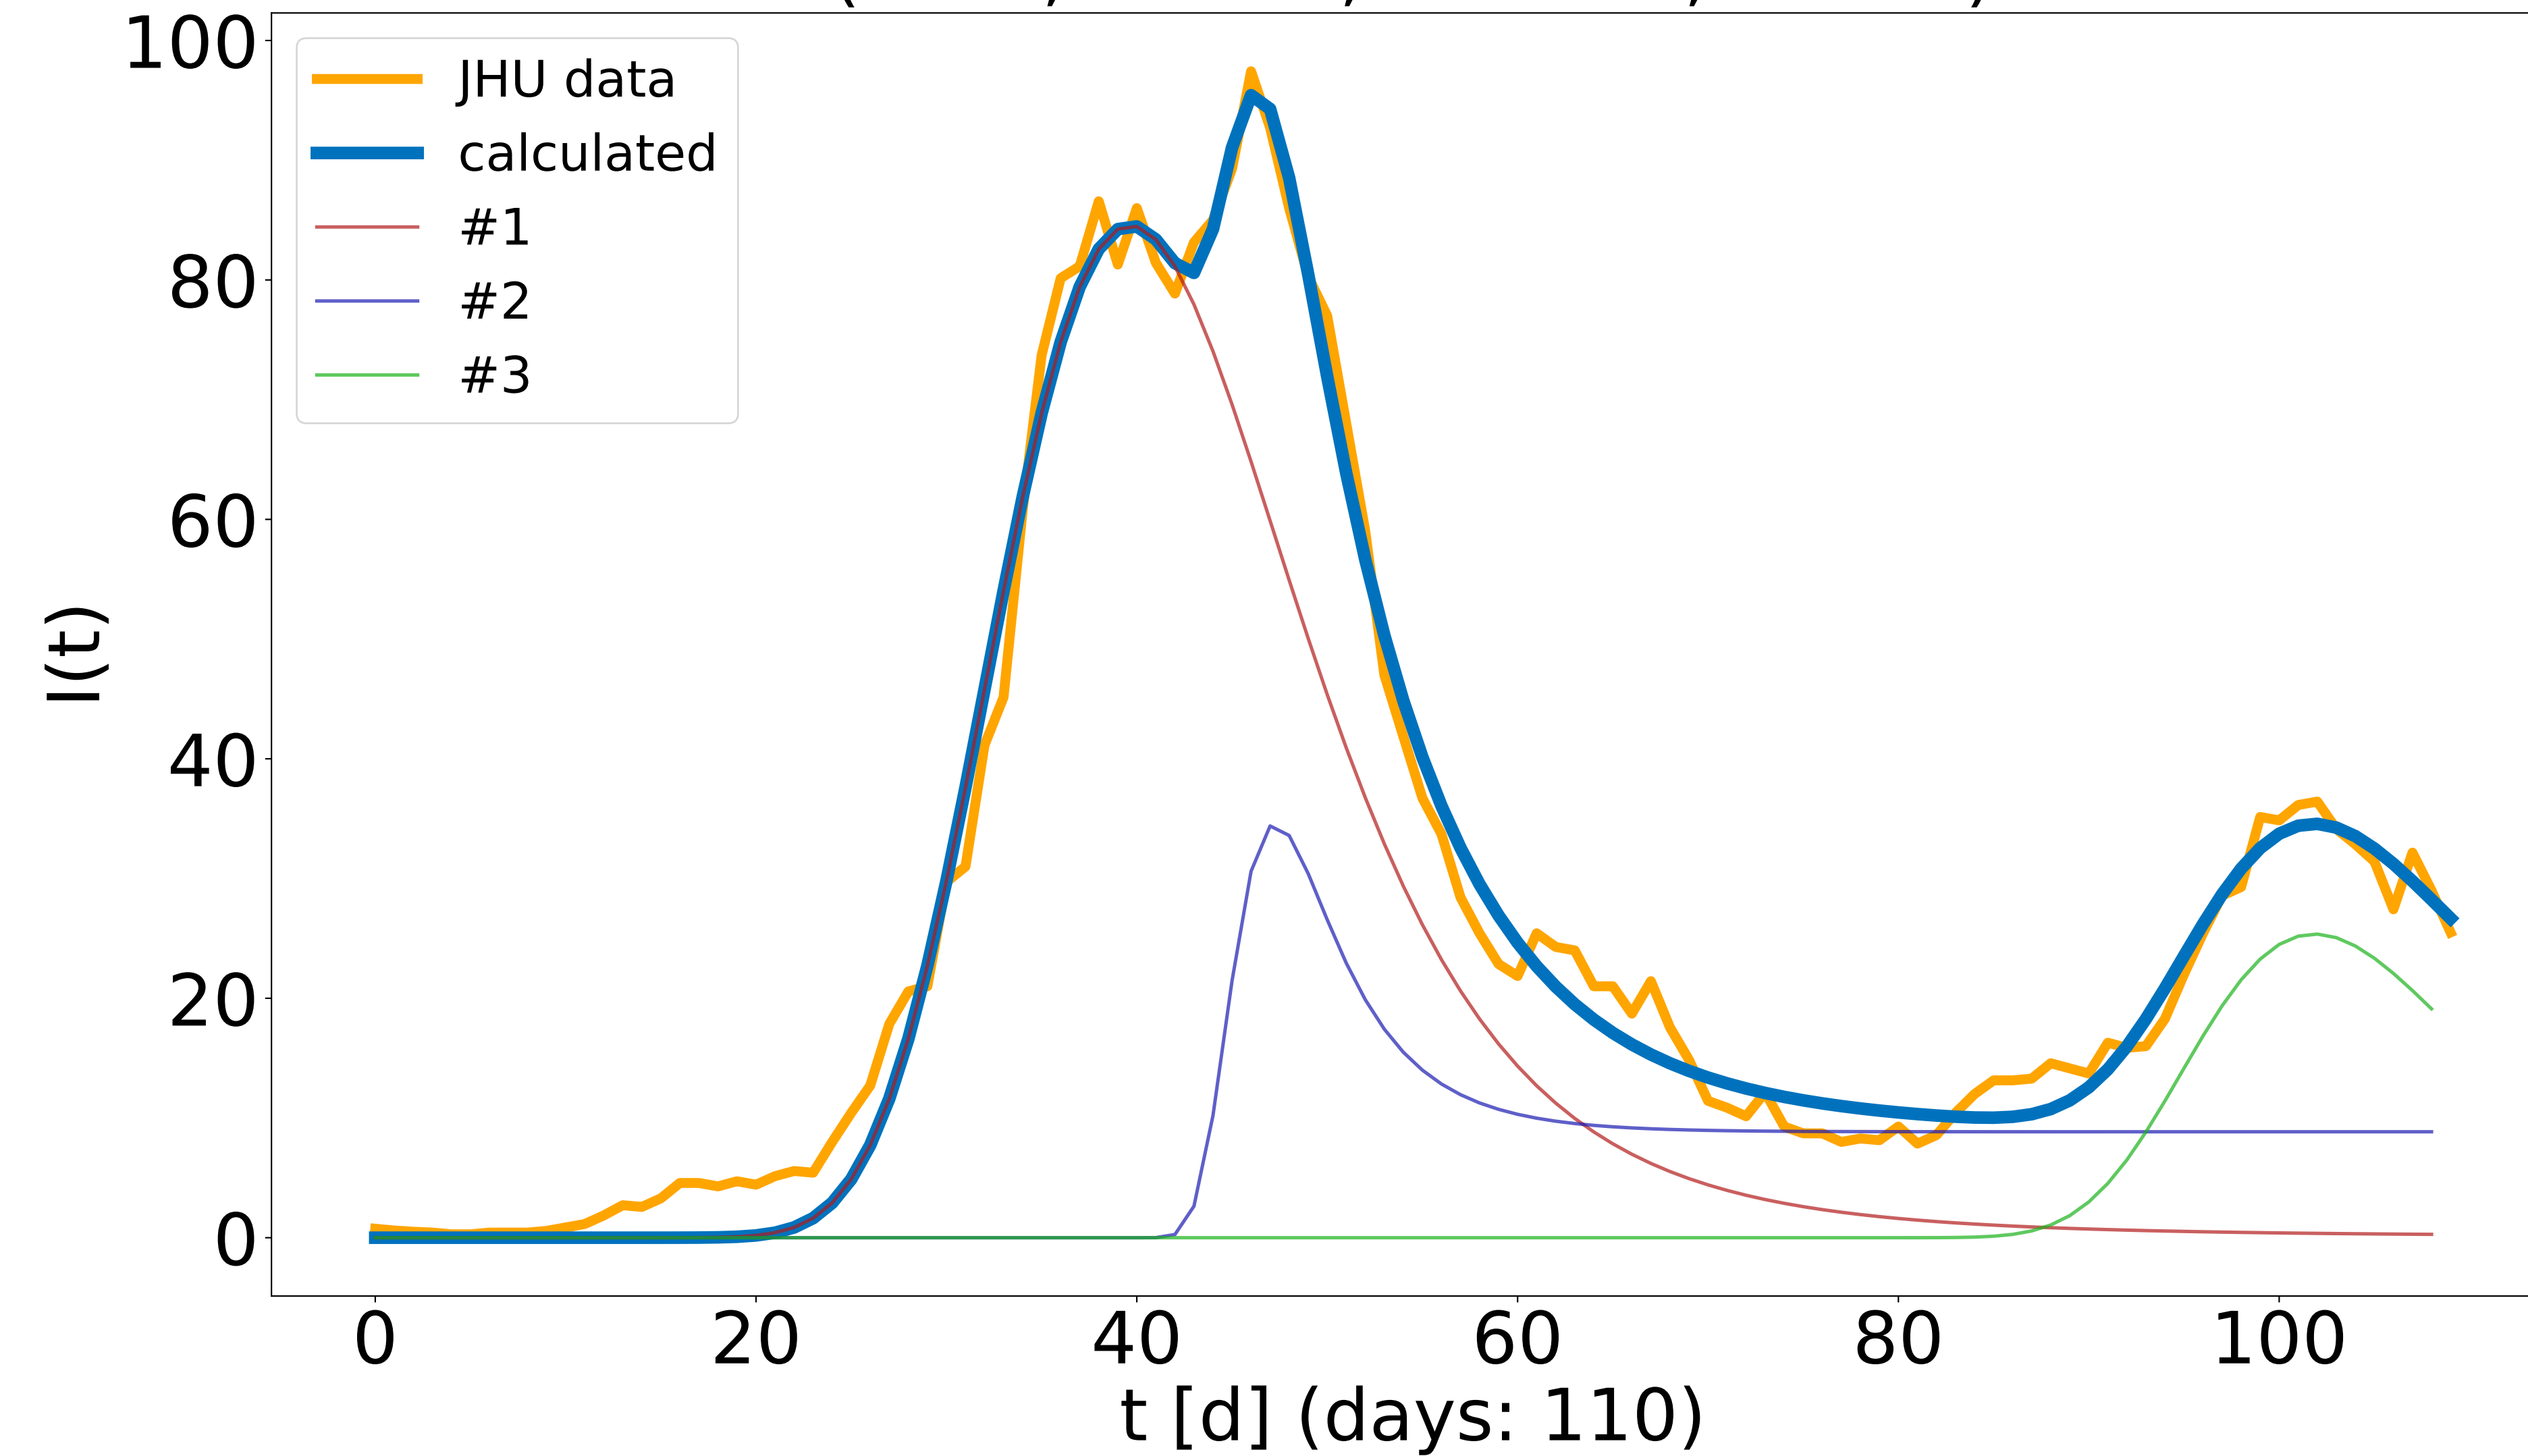



Racine, Wisconsin, US, Racine ( $R^2 = 0.431$ )

(i: 0.1, a: 0.403, b: 0.025, t: 20.2)

(i: 3.4, a: 1.981, b: 1.4, t: 47.6)

(i: 0.1, a: 1.707, b: 0.109, t: 63.4)

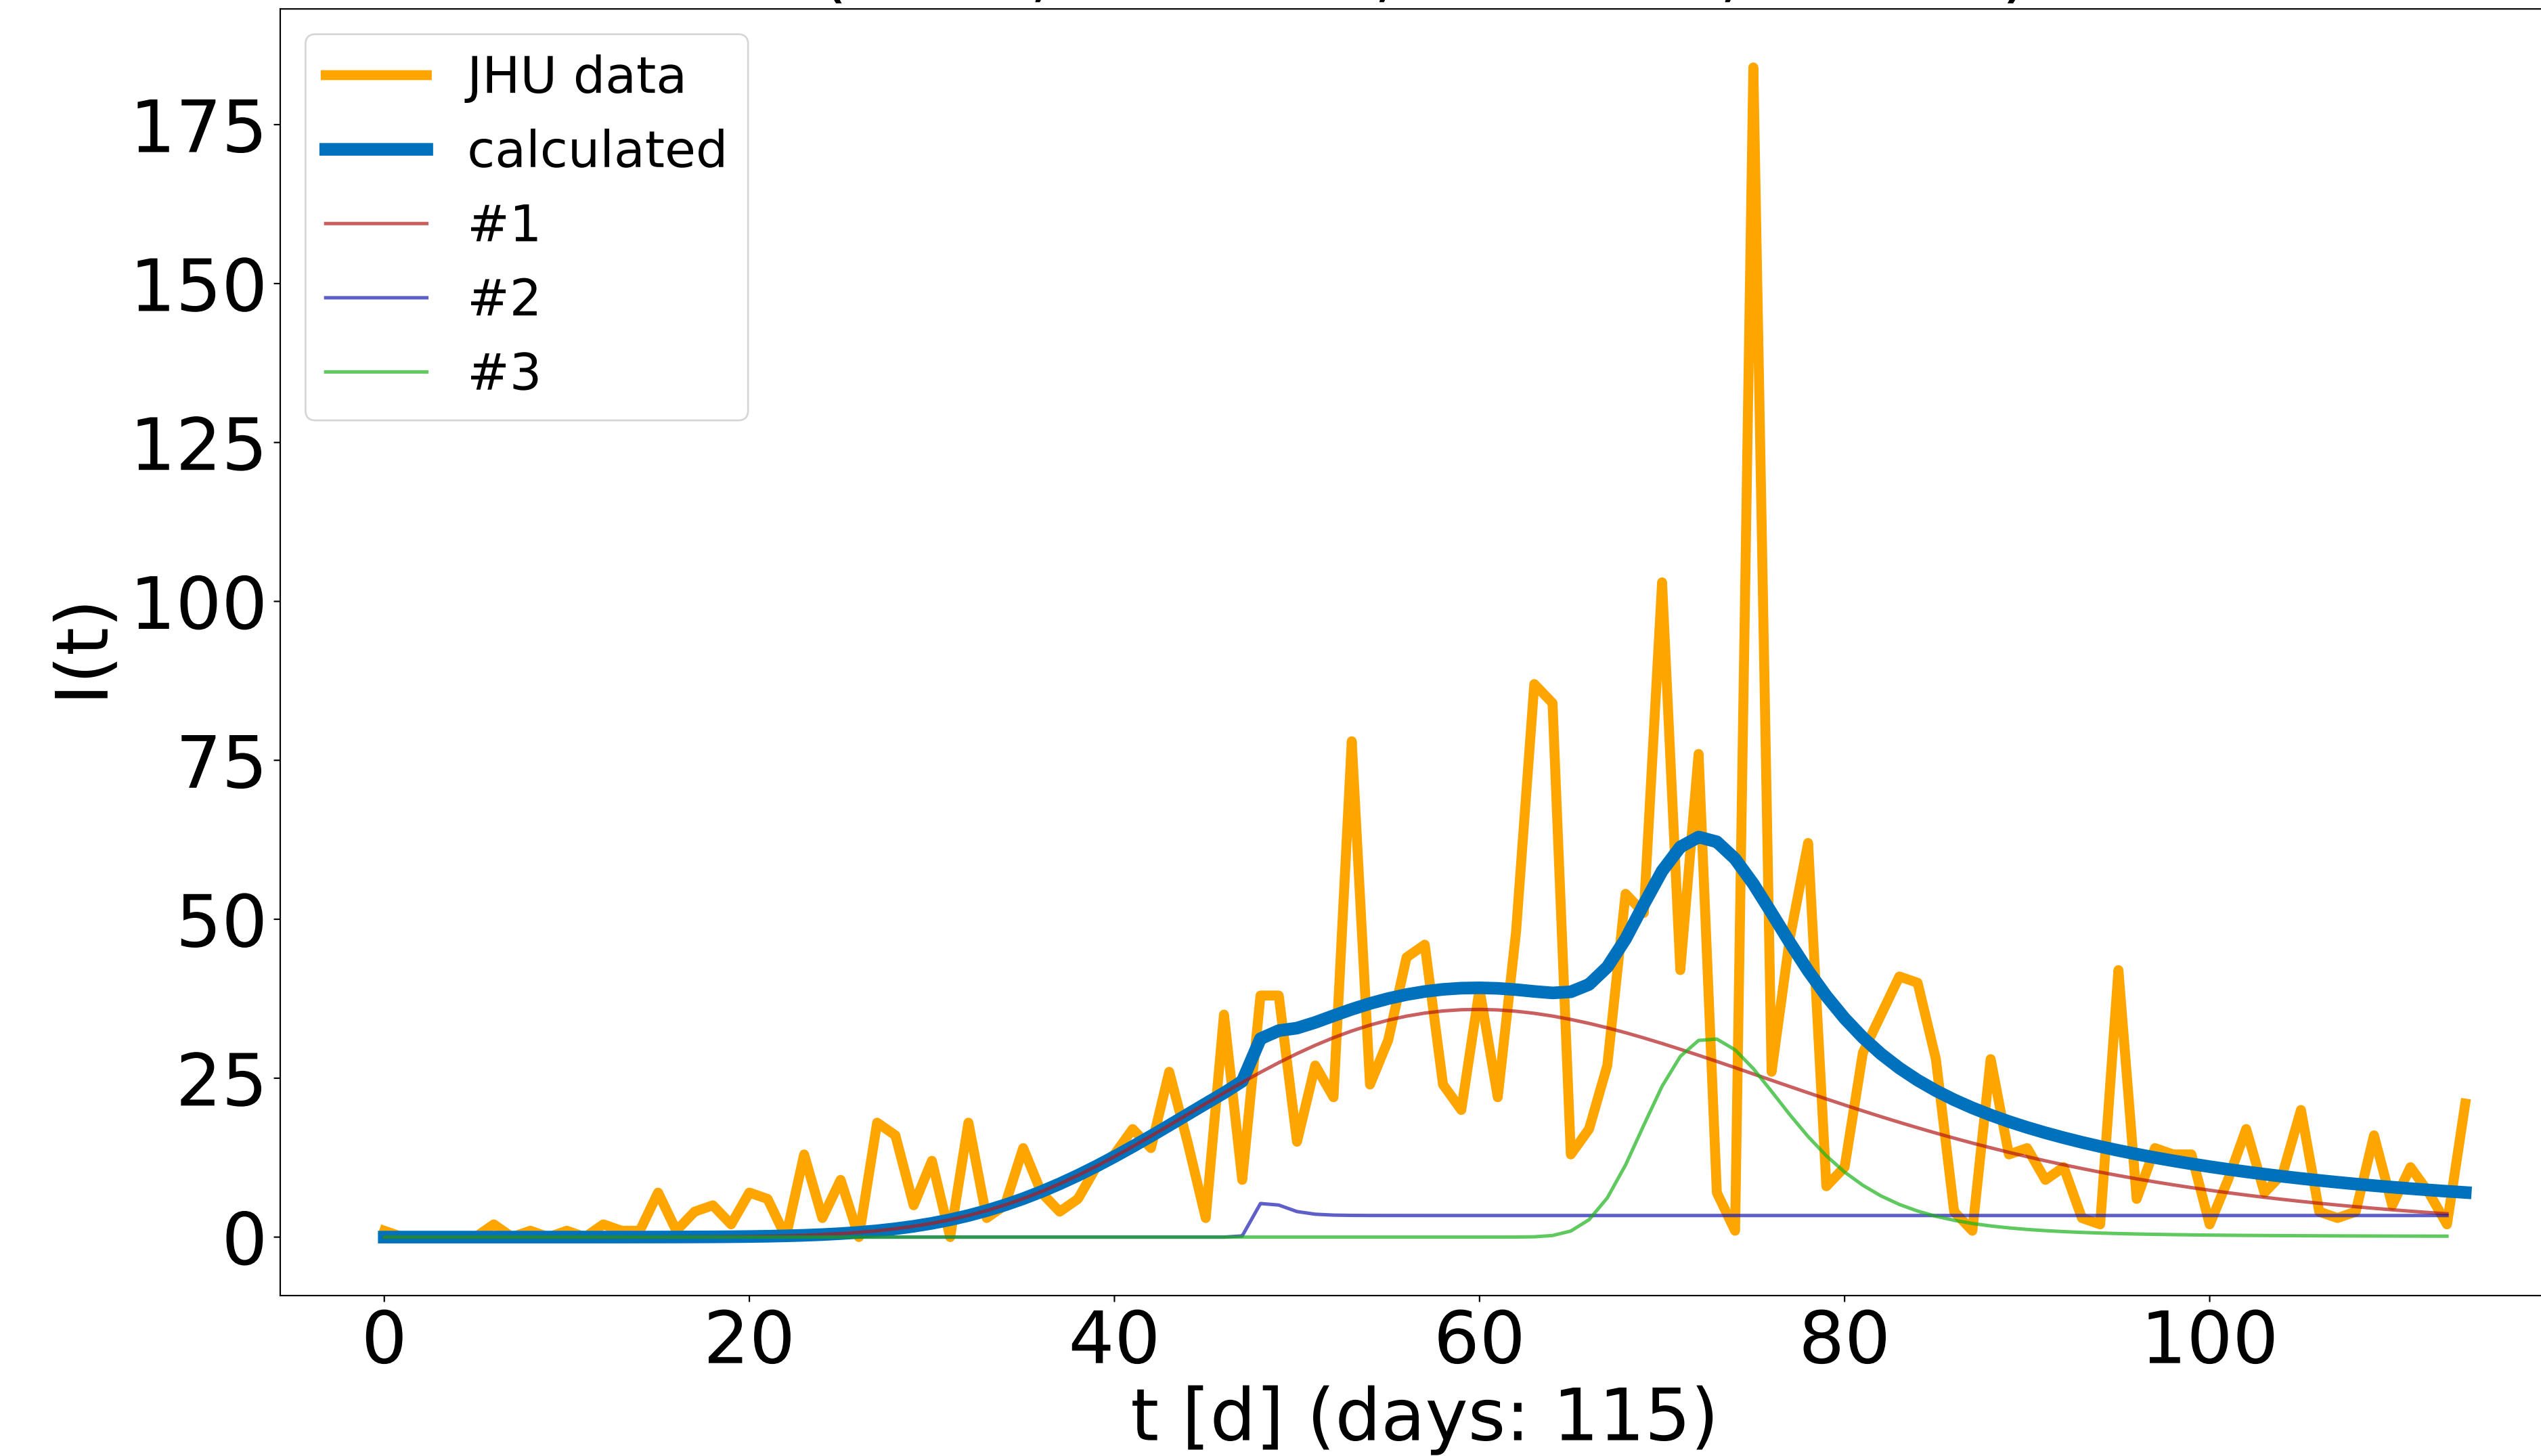

Racine, Wisconsin, US, Racine ( $R^2 = 0.973$ )

(i: 5.9, a: 0.081, b: 0.079, t: 21.0)

(i: 0.1, a: 0.527, b: 0.033, t: 30.6)

(i: 0.1, a: 1.443, b: 0.094, t: 62.6)

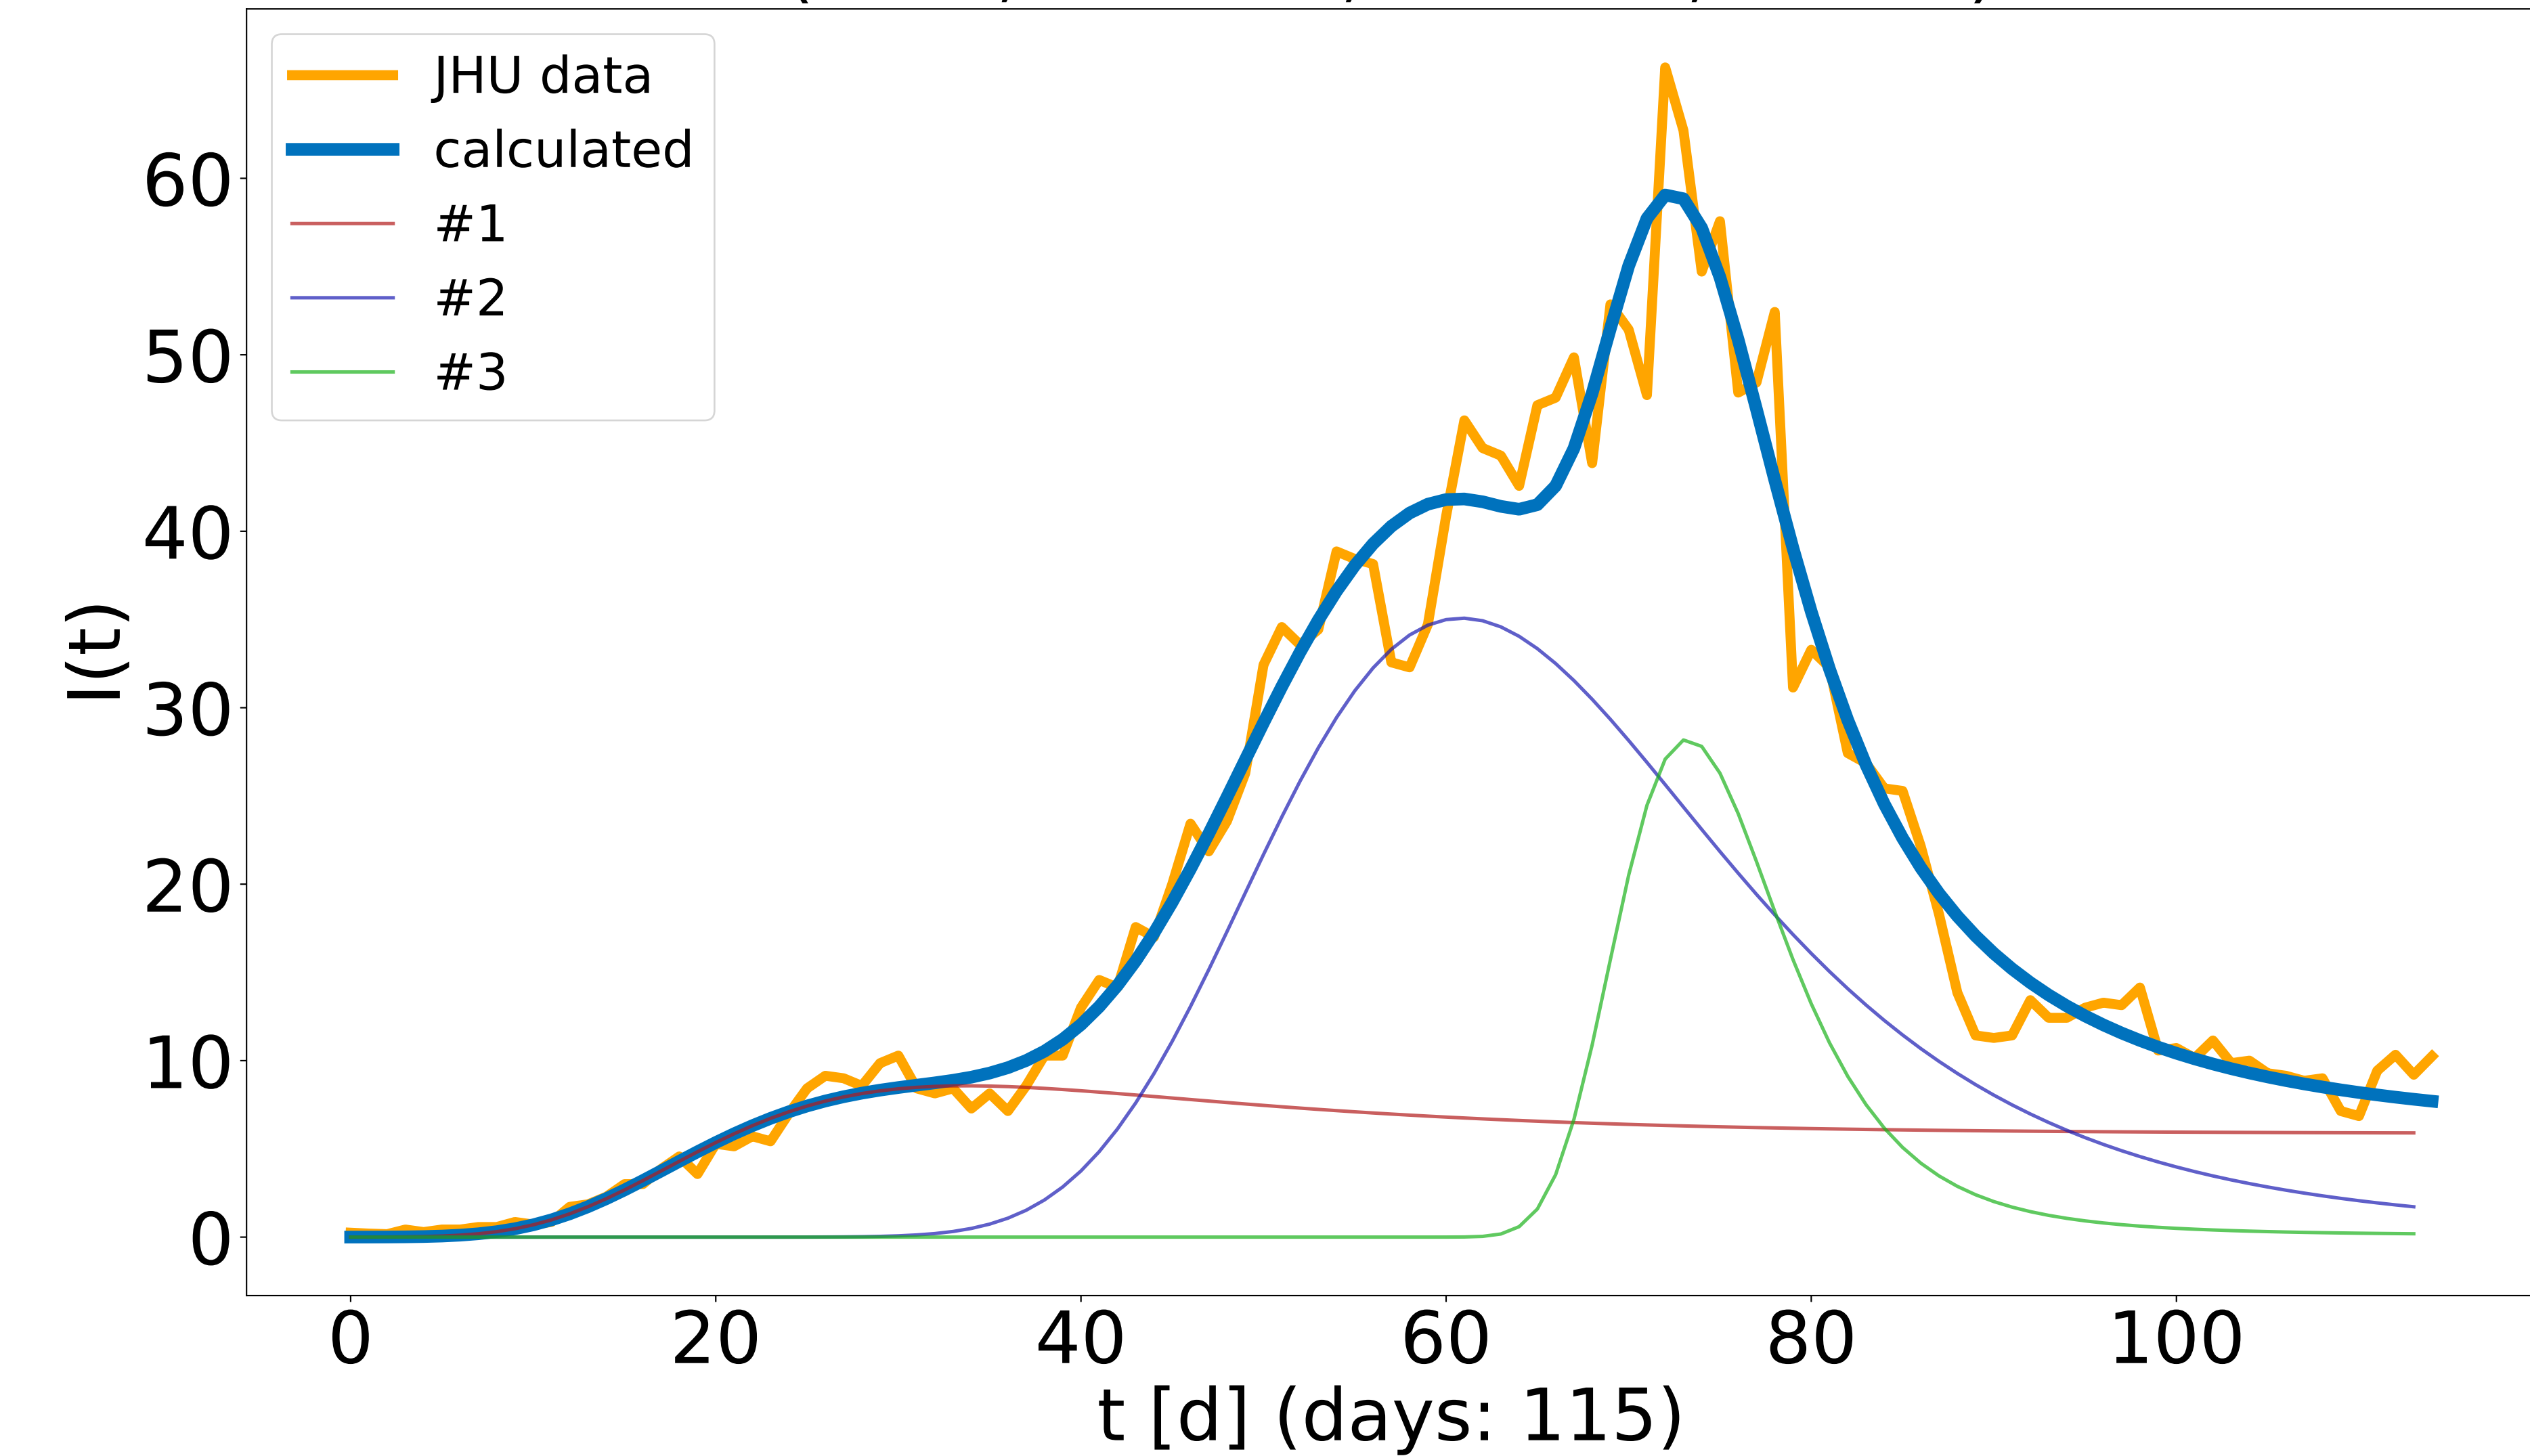

Weber-Morgan, Utah, US, Weber-Morgan ( $R^2 = 0.785$ )

(i: 1.2, a: 2.0, b: 0.593, t: 5.0)

(i: 2.4, a: 2.0, b: 0.771, t: 10.4)

(i: 92.9, a: 0.014, b: 0.019, t: 139.9)

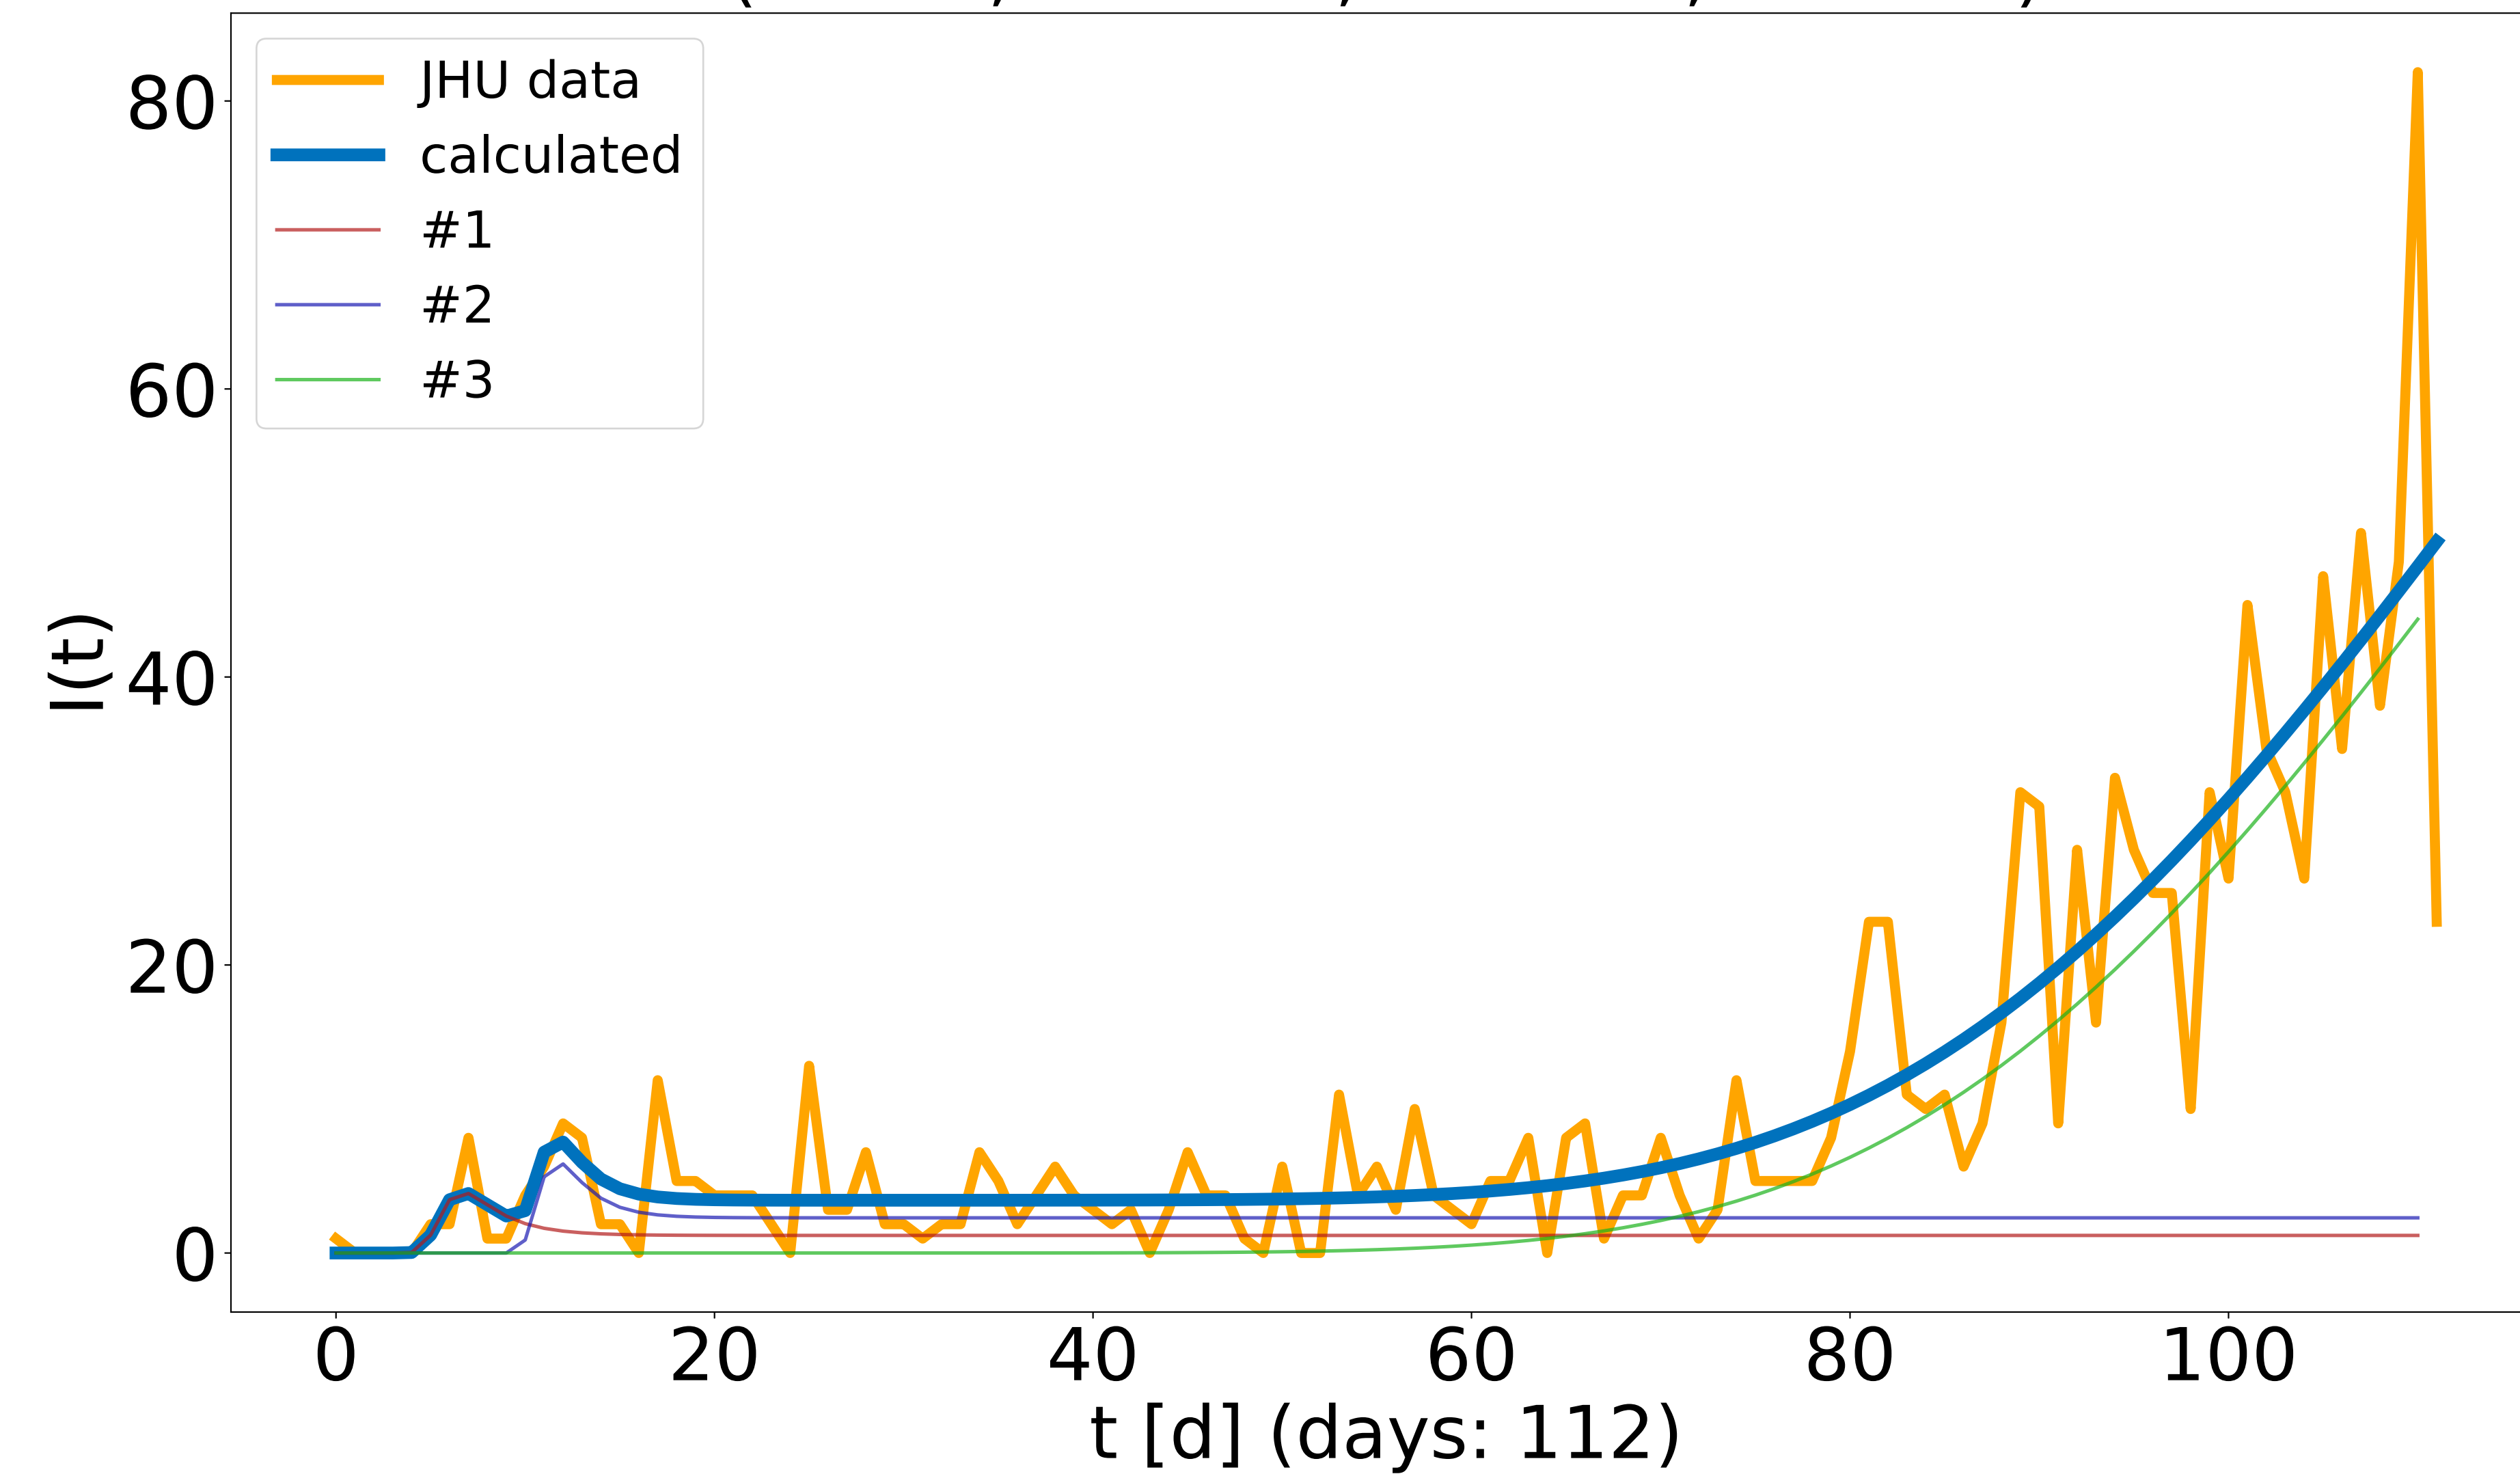

Weber-Morgan, Utah, US, Weber-Morgan ( $R^2 = 0.992$ )

(i: 3.6, a: 0.154, b: 0.181, t: 7.8)

(i: 0.1, a: 0.178, b: 0.009, t: 52.3)

(i: 4.1, a: 0.261, b: 0.869, t: 79.0)

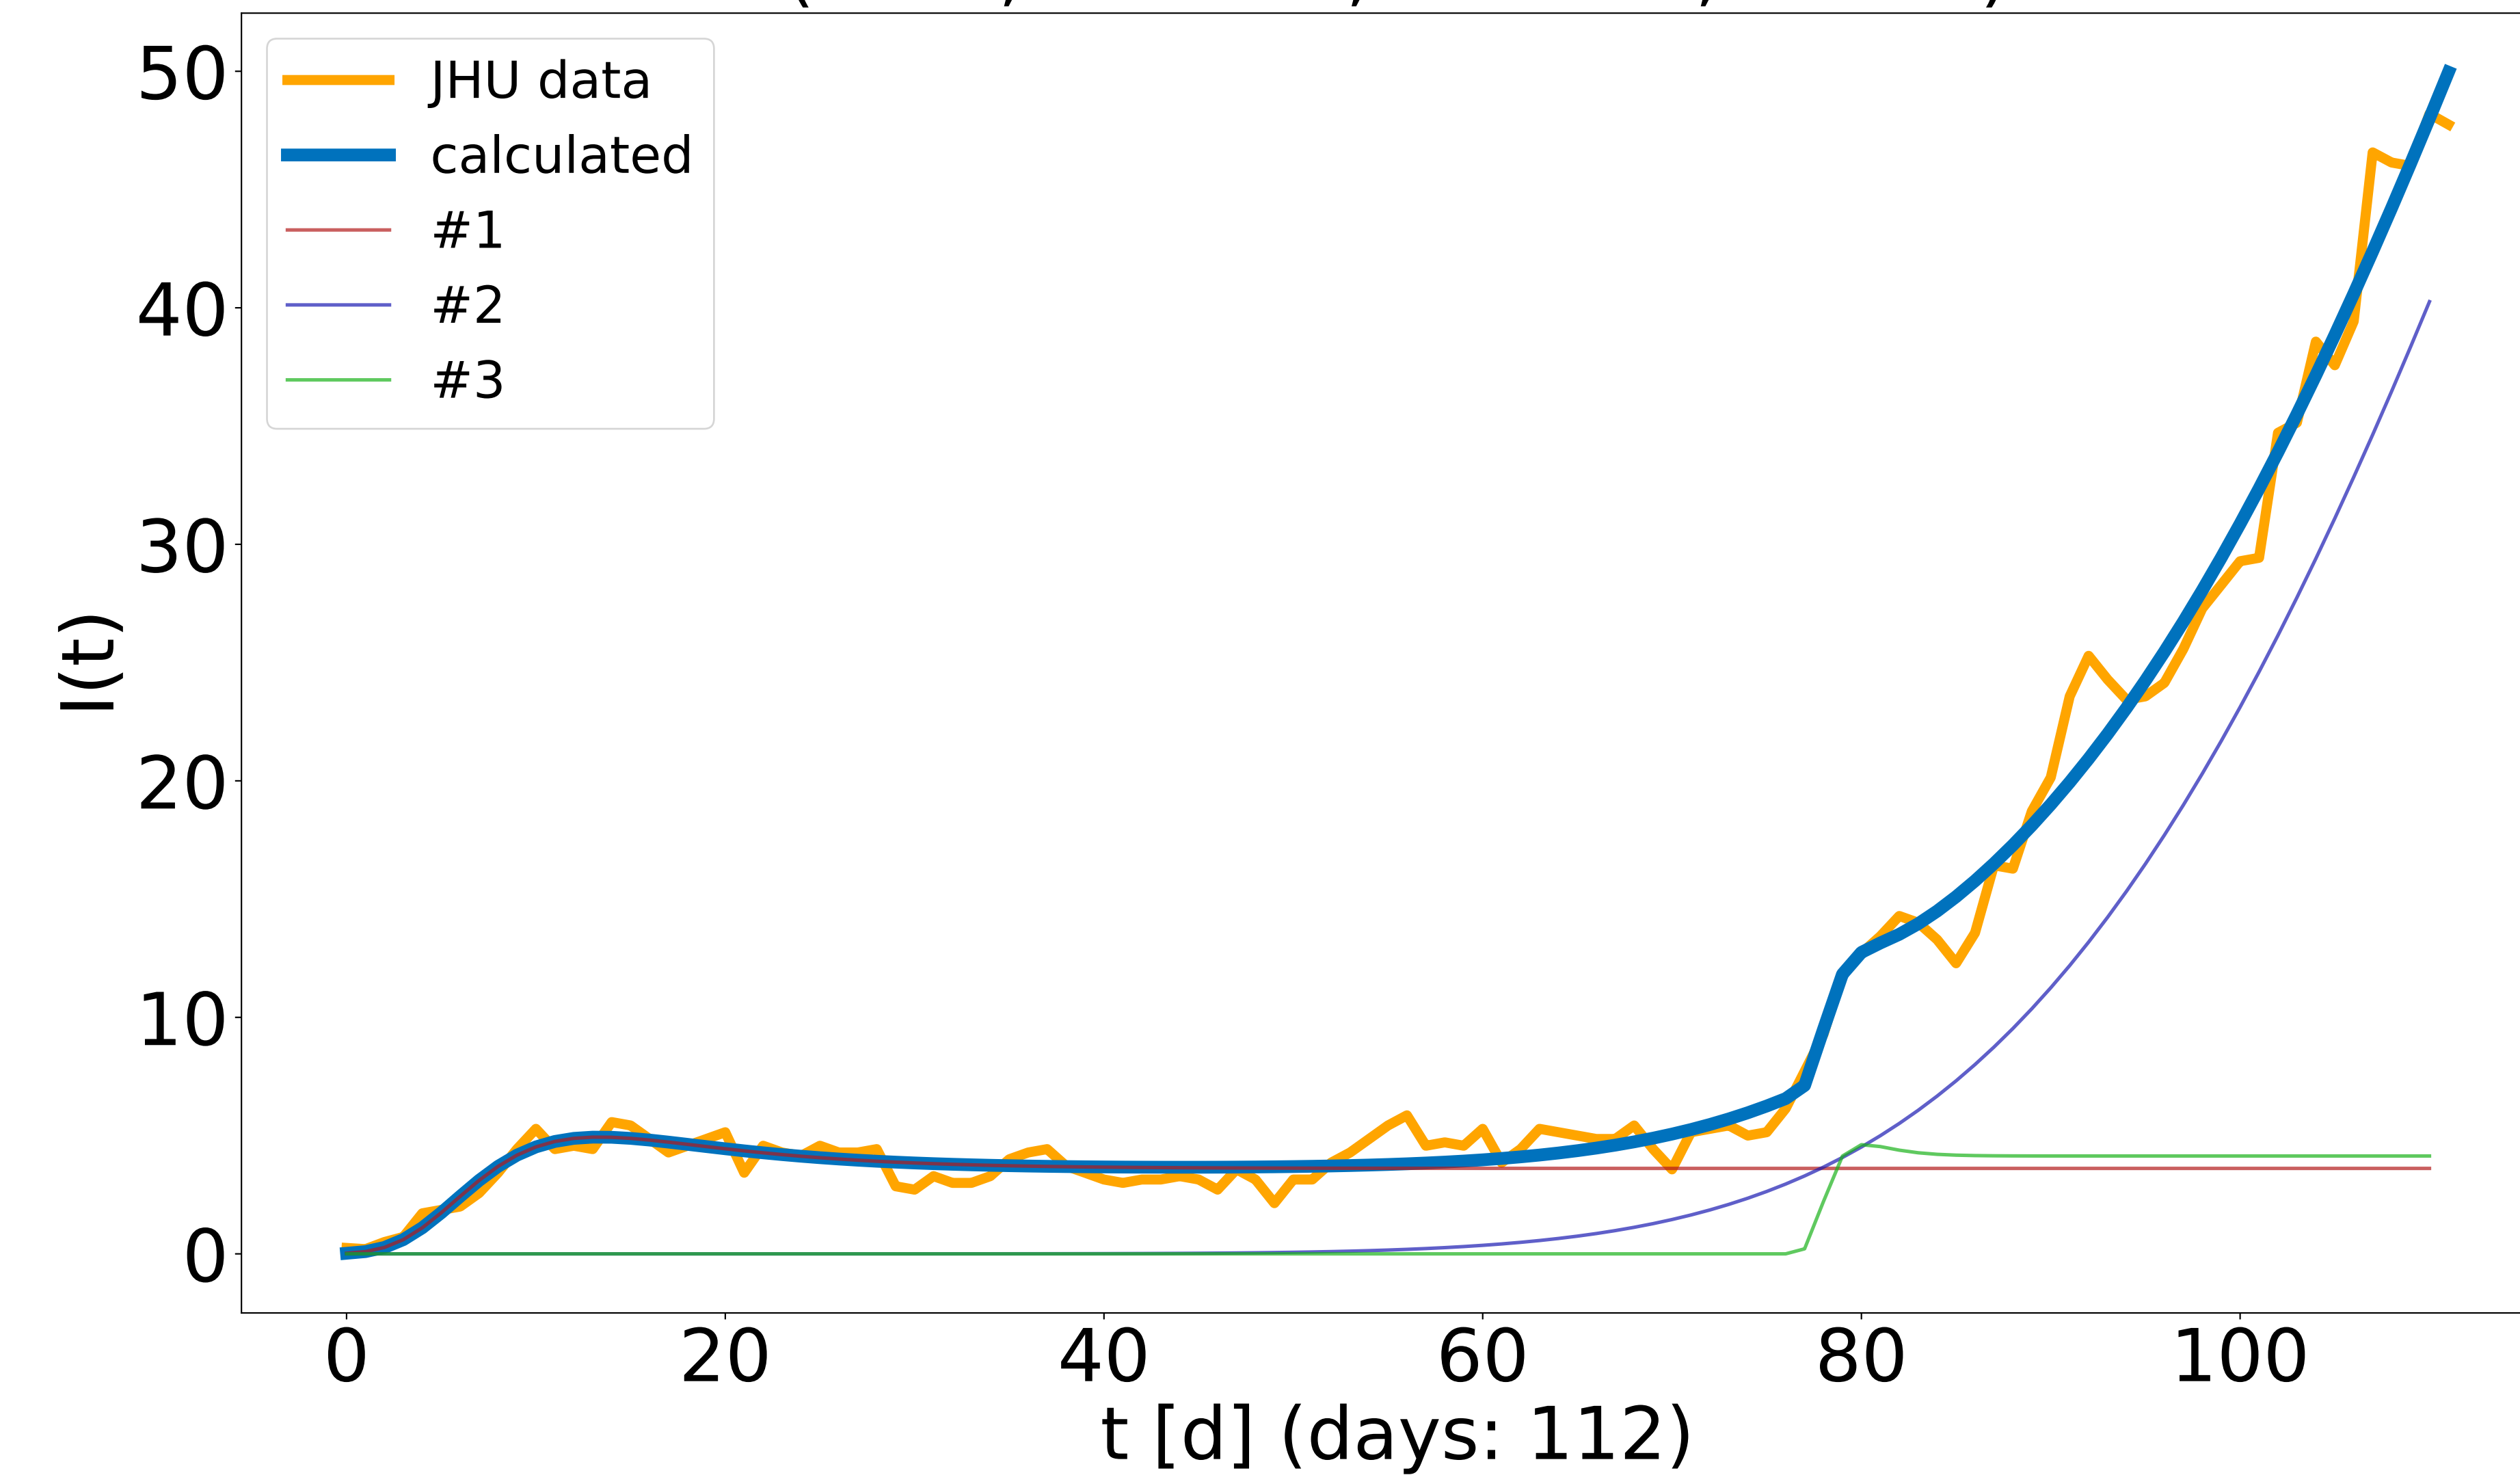

Supplement: Supplementary file 2 [file supplementary]
