# Supplementary material for: <strong>Mathematical Modeling of the Development of Confirmed Daily Infection Numbers in the COVID-19 Pandemic by a Special Exponential Function</strong>
Source: Preprints.org preprint supplement (doi:10.20944/preprints202011.0531.v1), 2020-11-20

# Mathematical modeling of the development of confirmed daily infection numbers in the COVID-19 pandemic by a special exponential function

Egbert Keller, Johannes Keller, and Matthias Selg

## Supplementary Material I

Diagrams of successful modeling attempts with one function of type (1)

$$\hat{I}(t) = \hat{I}(0) e^{(ae^{-bt})t} \quad (1)$$

By an automatic procedure, daily infection number developments in all countries and US counties monitored by JHU [9] were modeled using one function of type (1) (status: end of June, 2020). The diagrams of those modeling attempts leading to an  $R^2$  value  $> 0.97$  (for the 7-days averaged data) are shown in the following. As in Fig. 1 of the paper, function parameters for raw data (left diagram) and for 7-days averaged data were determined separately (while for Fig. 2 parameters were determined for 7-days averaged data only).

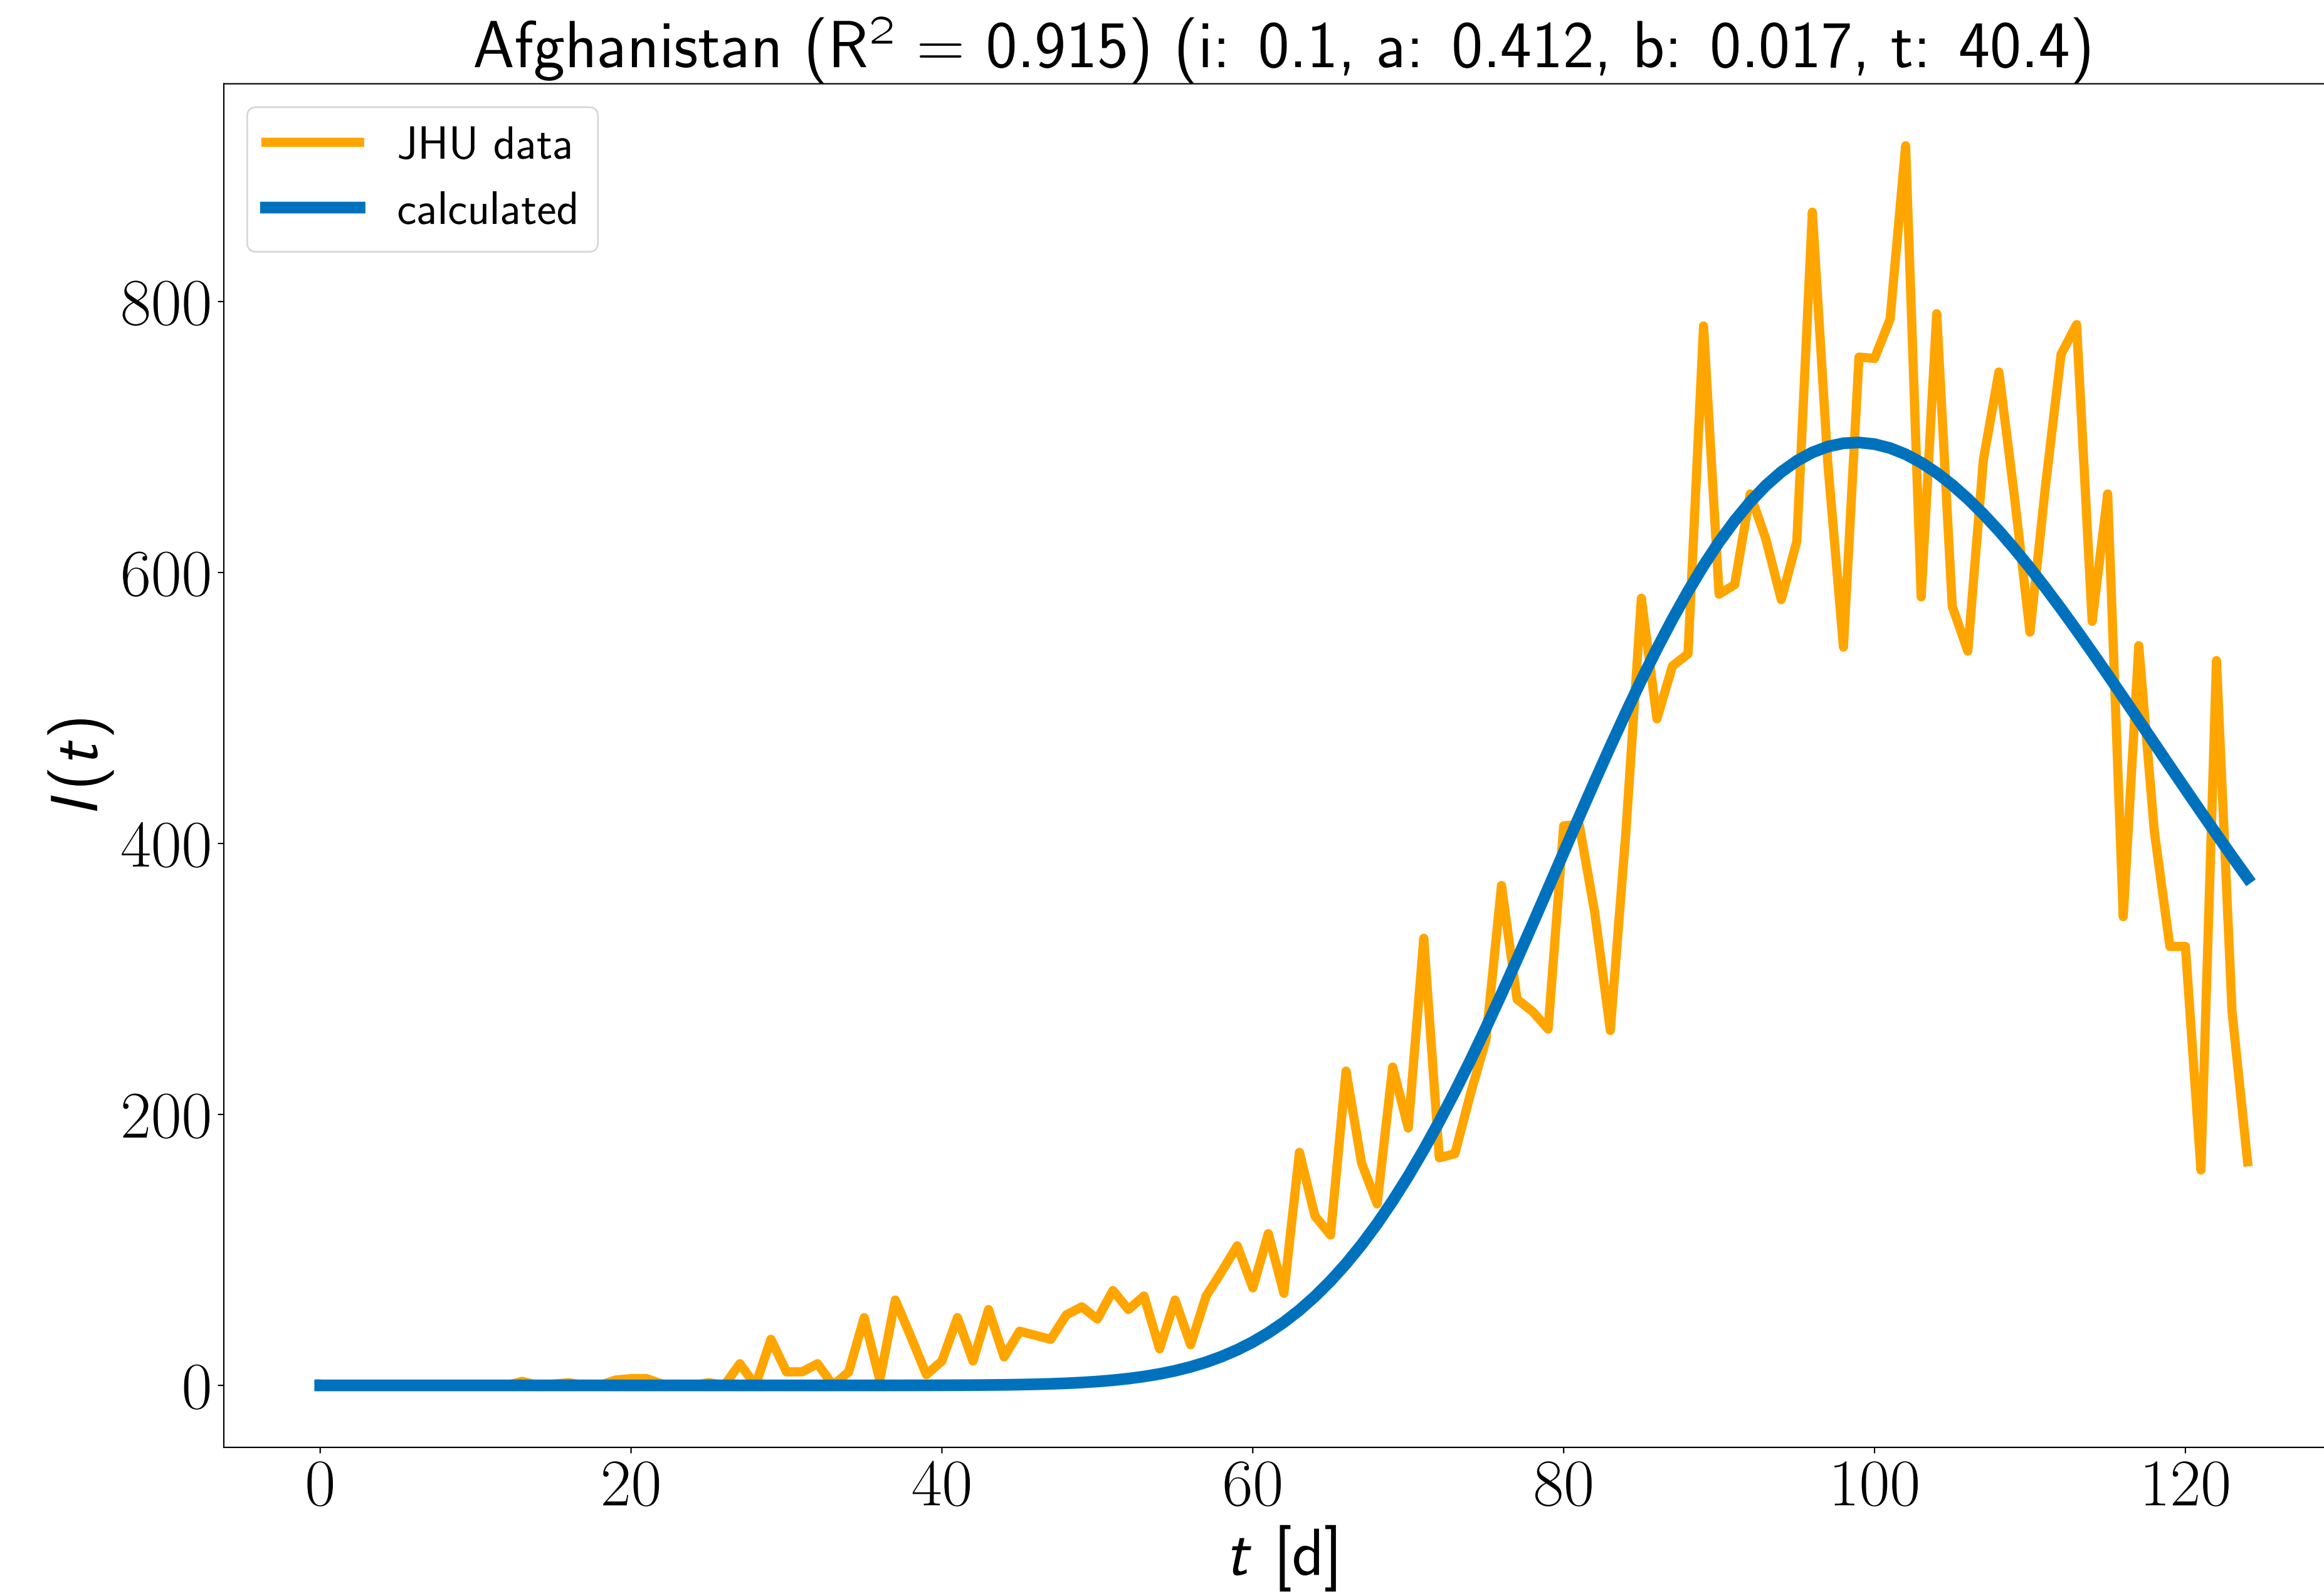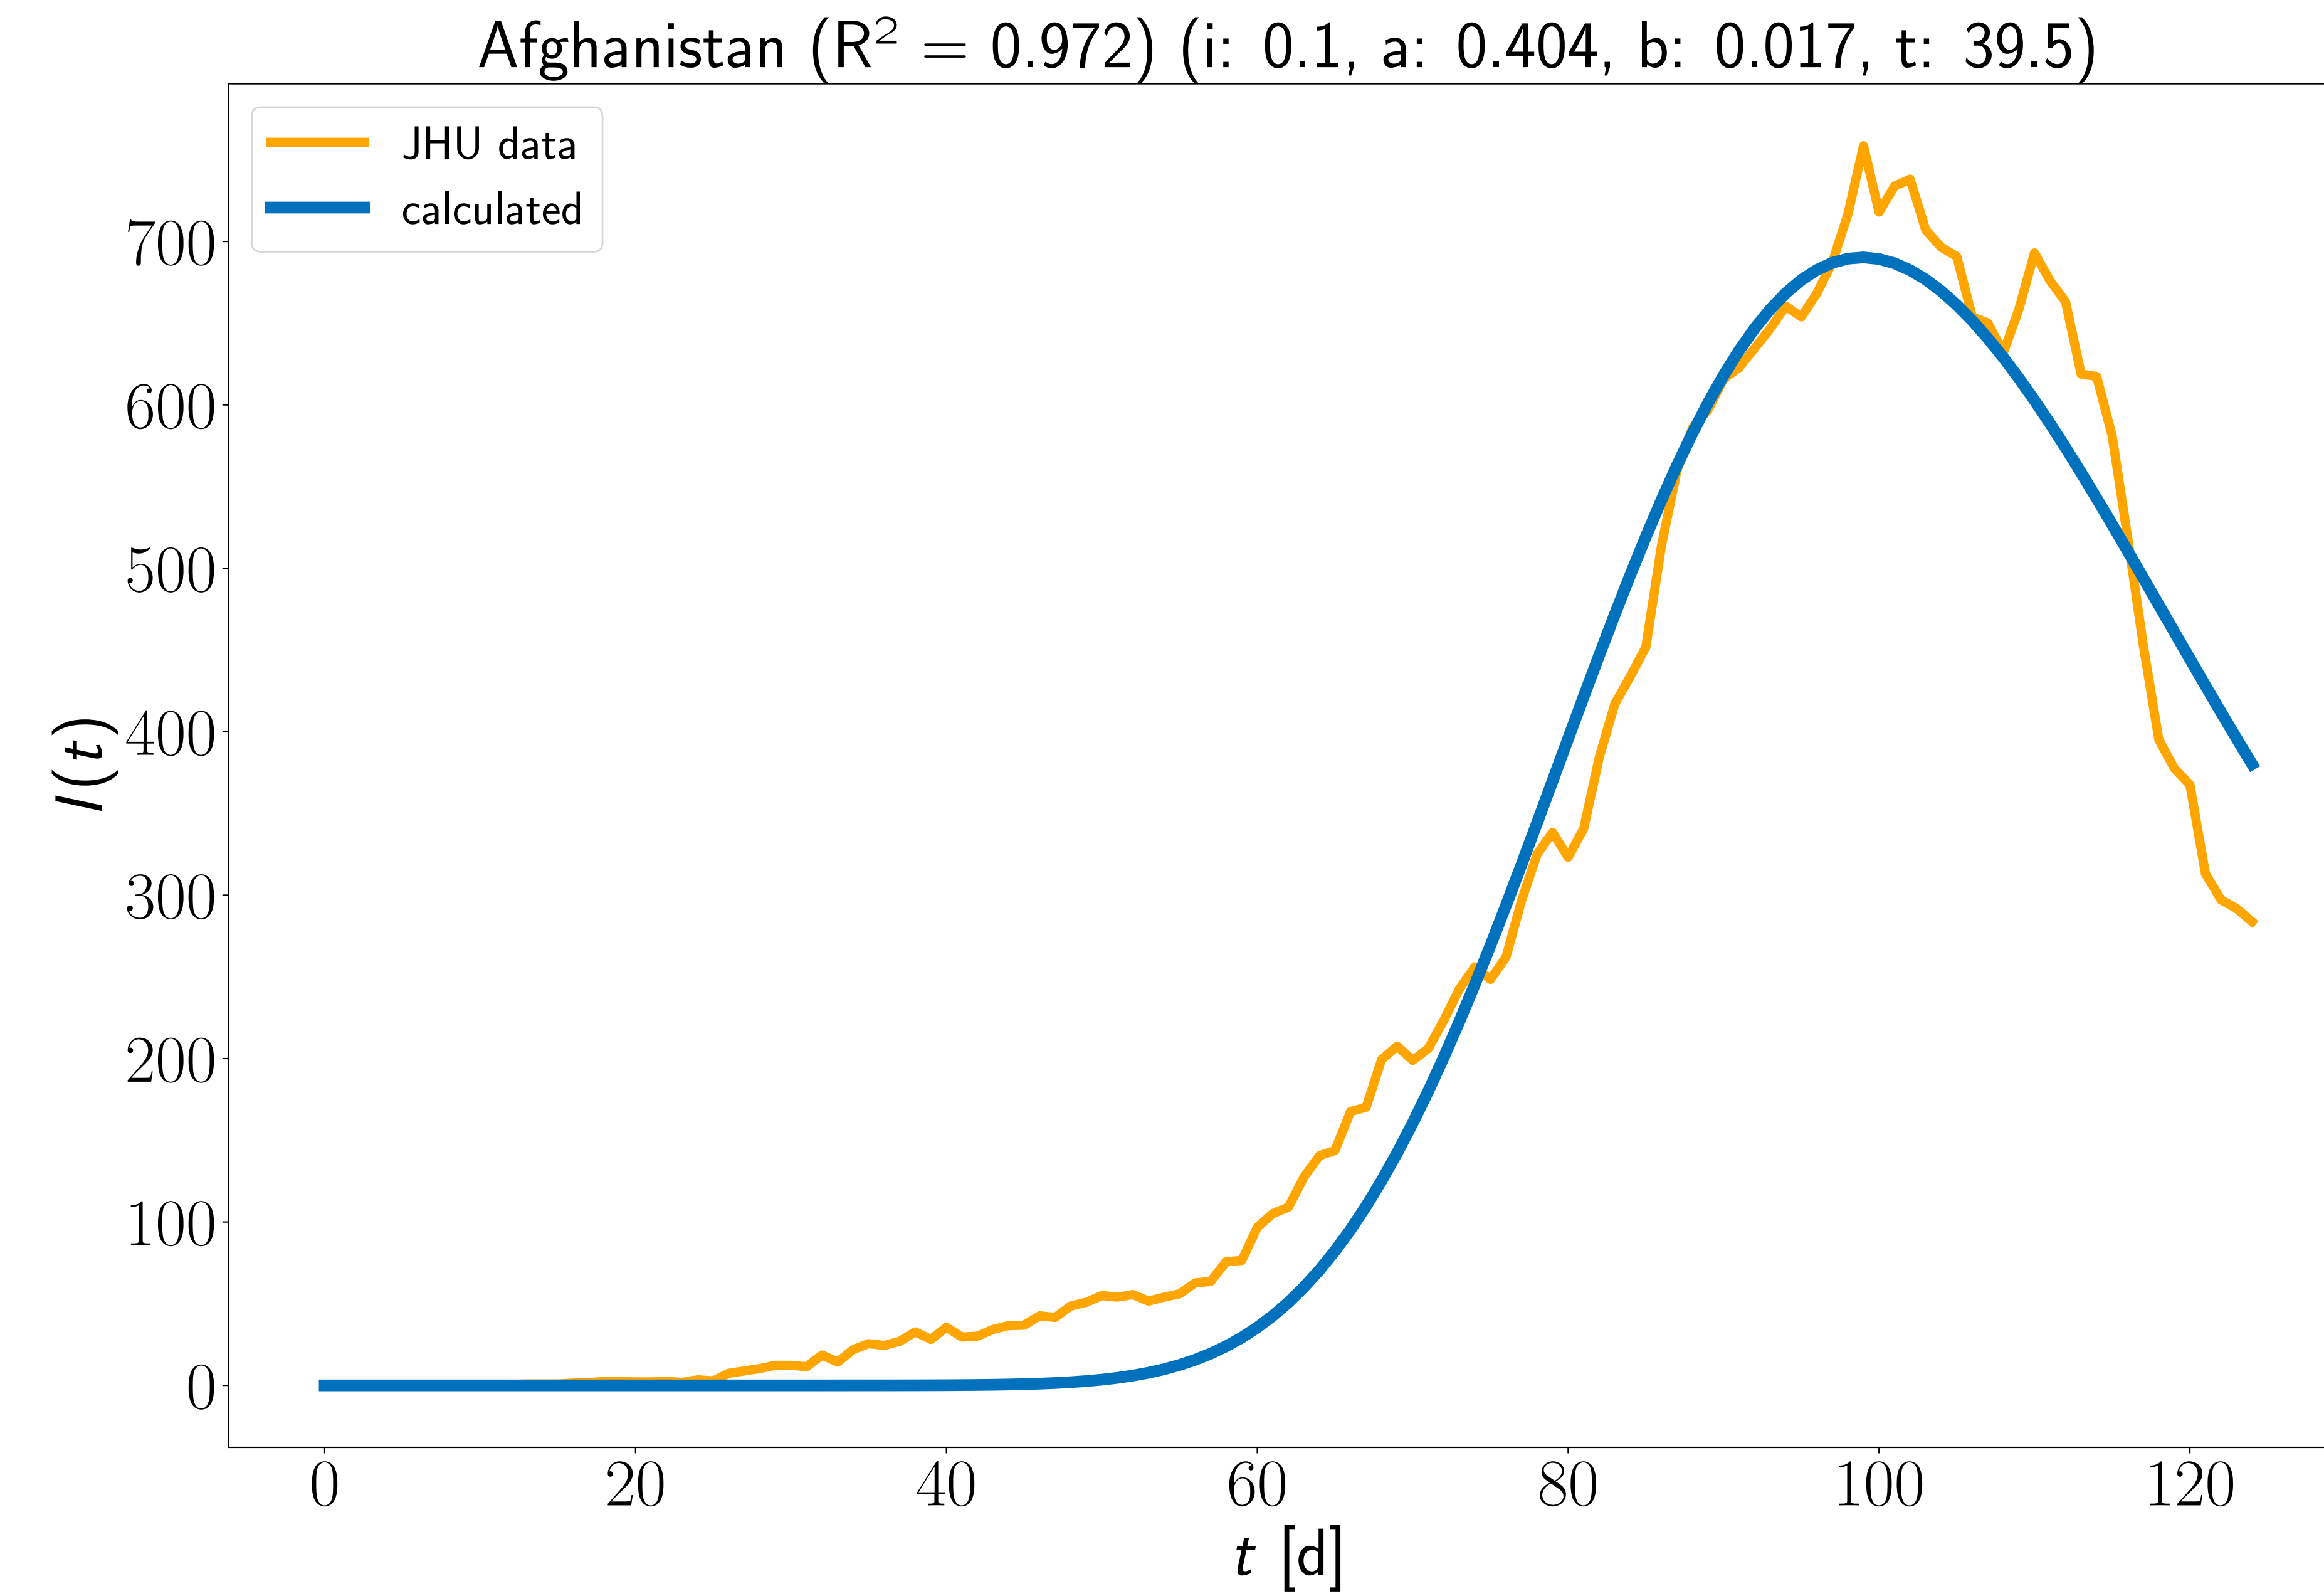

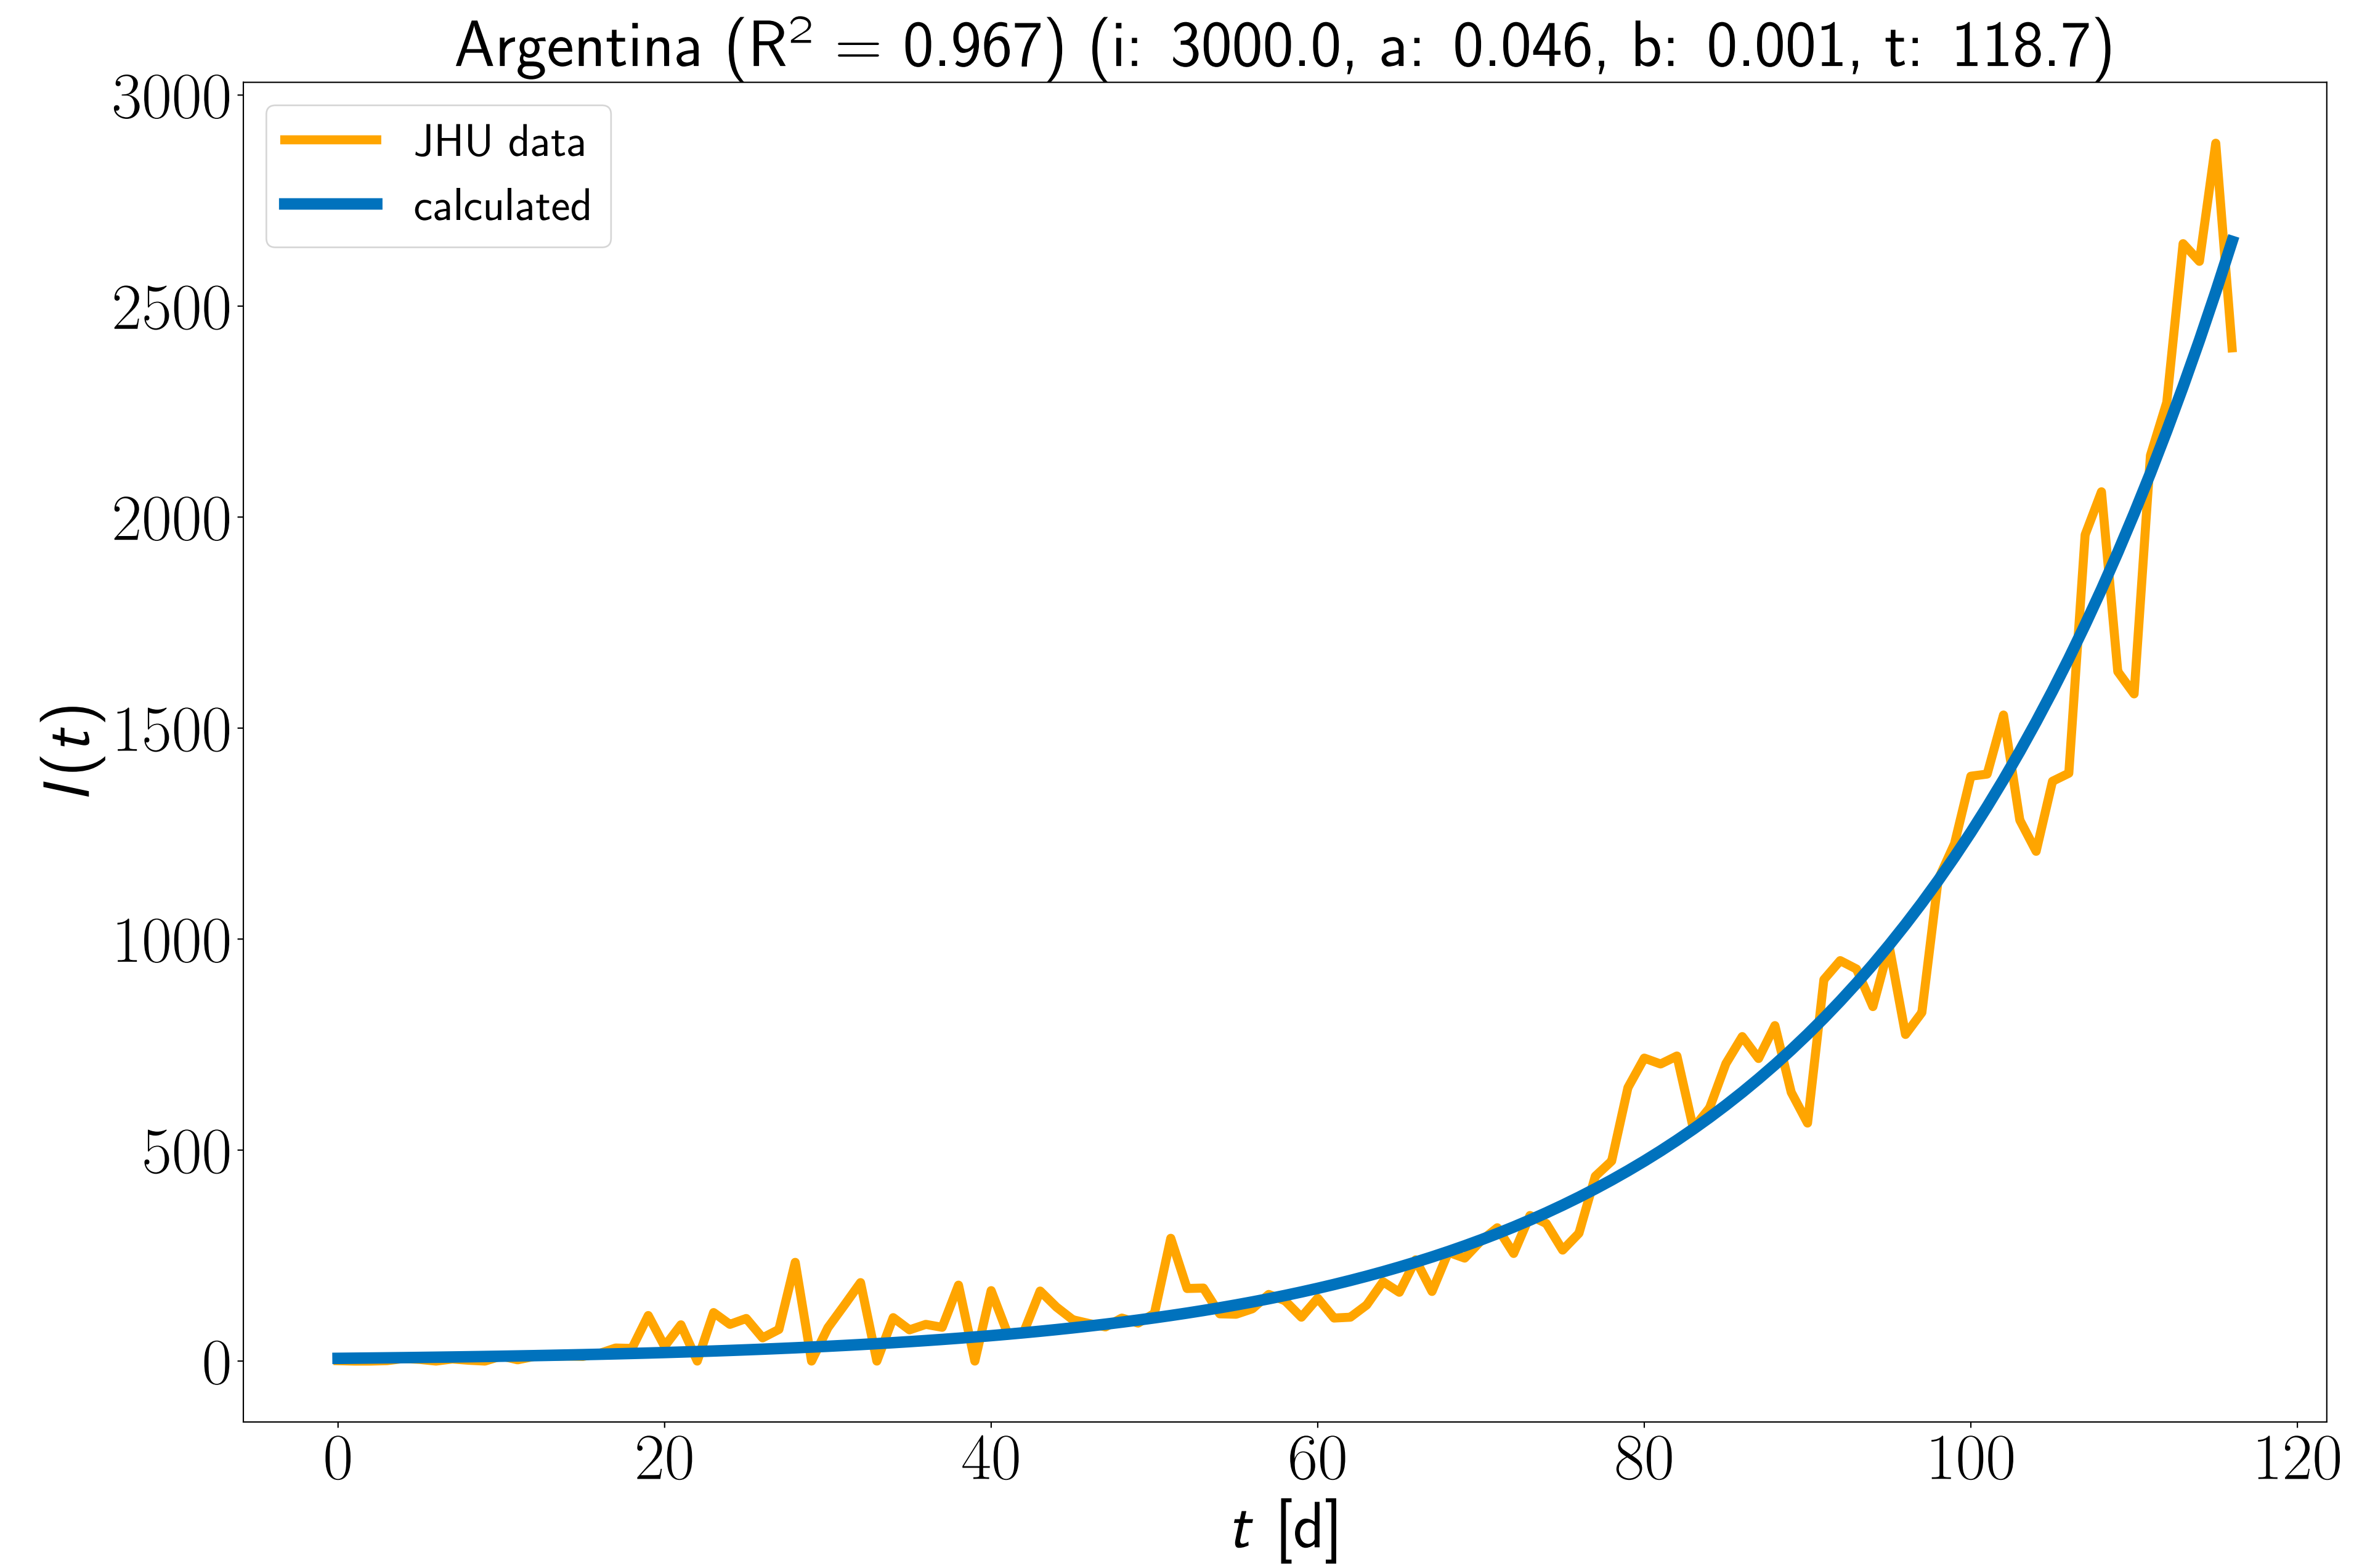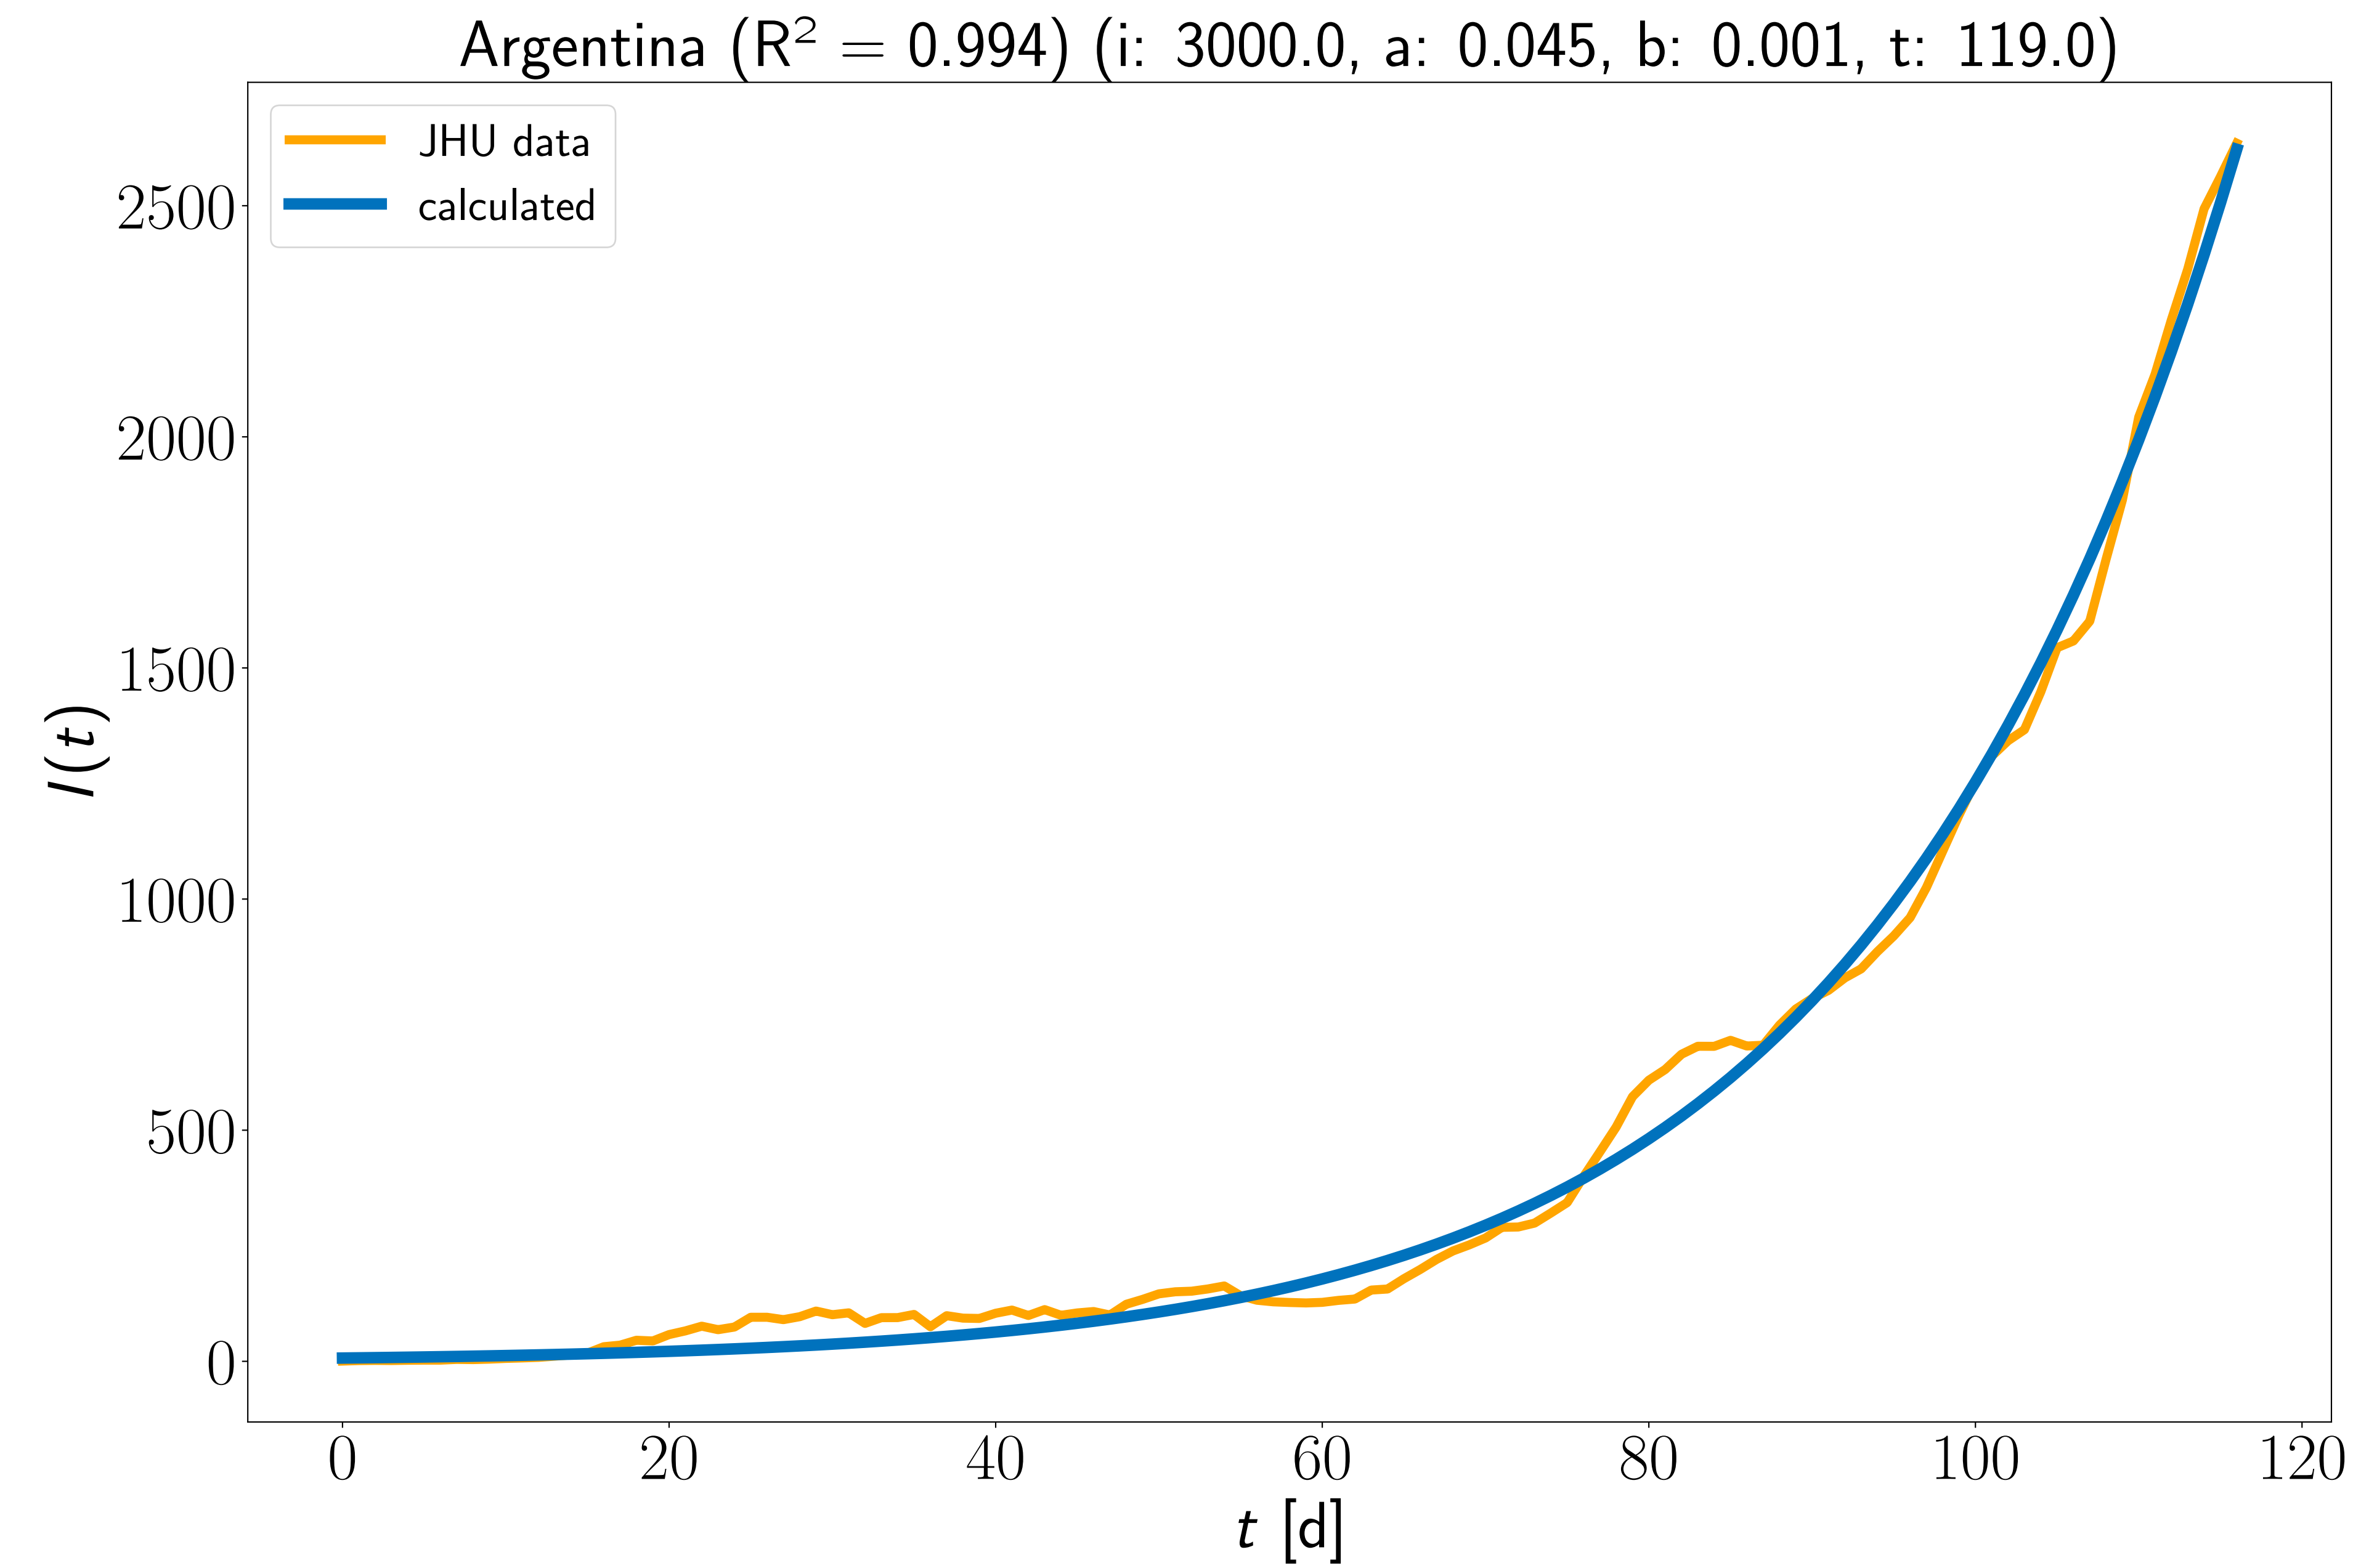

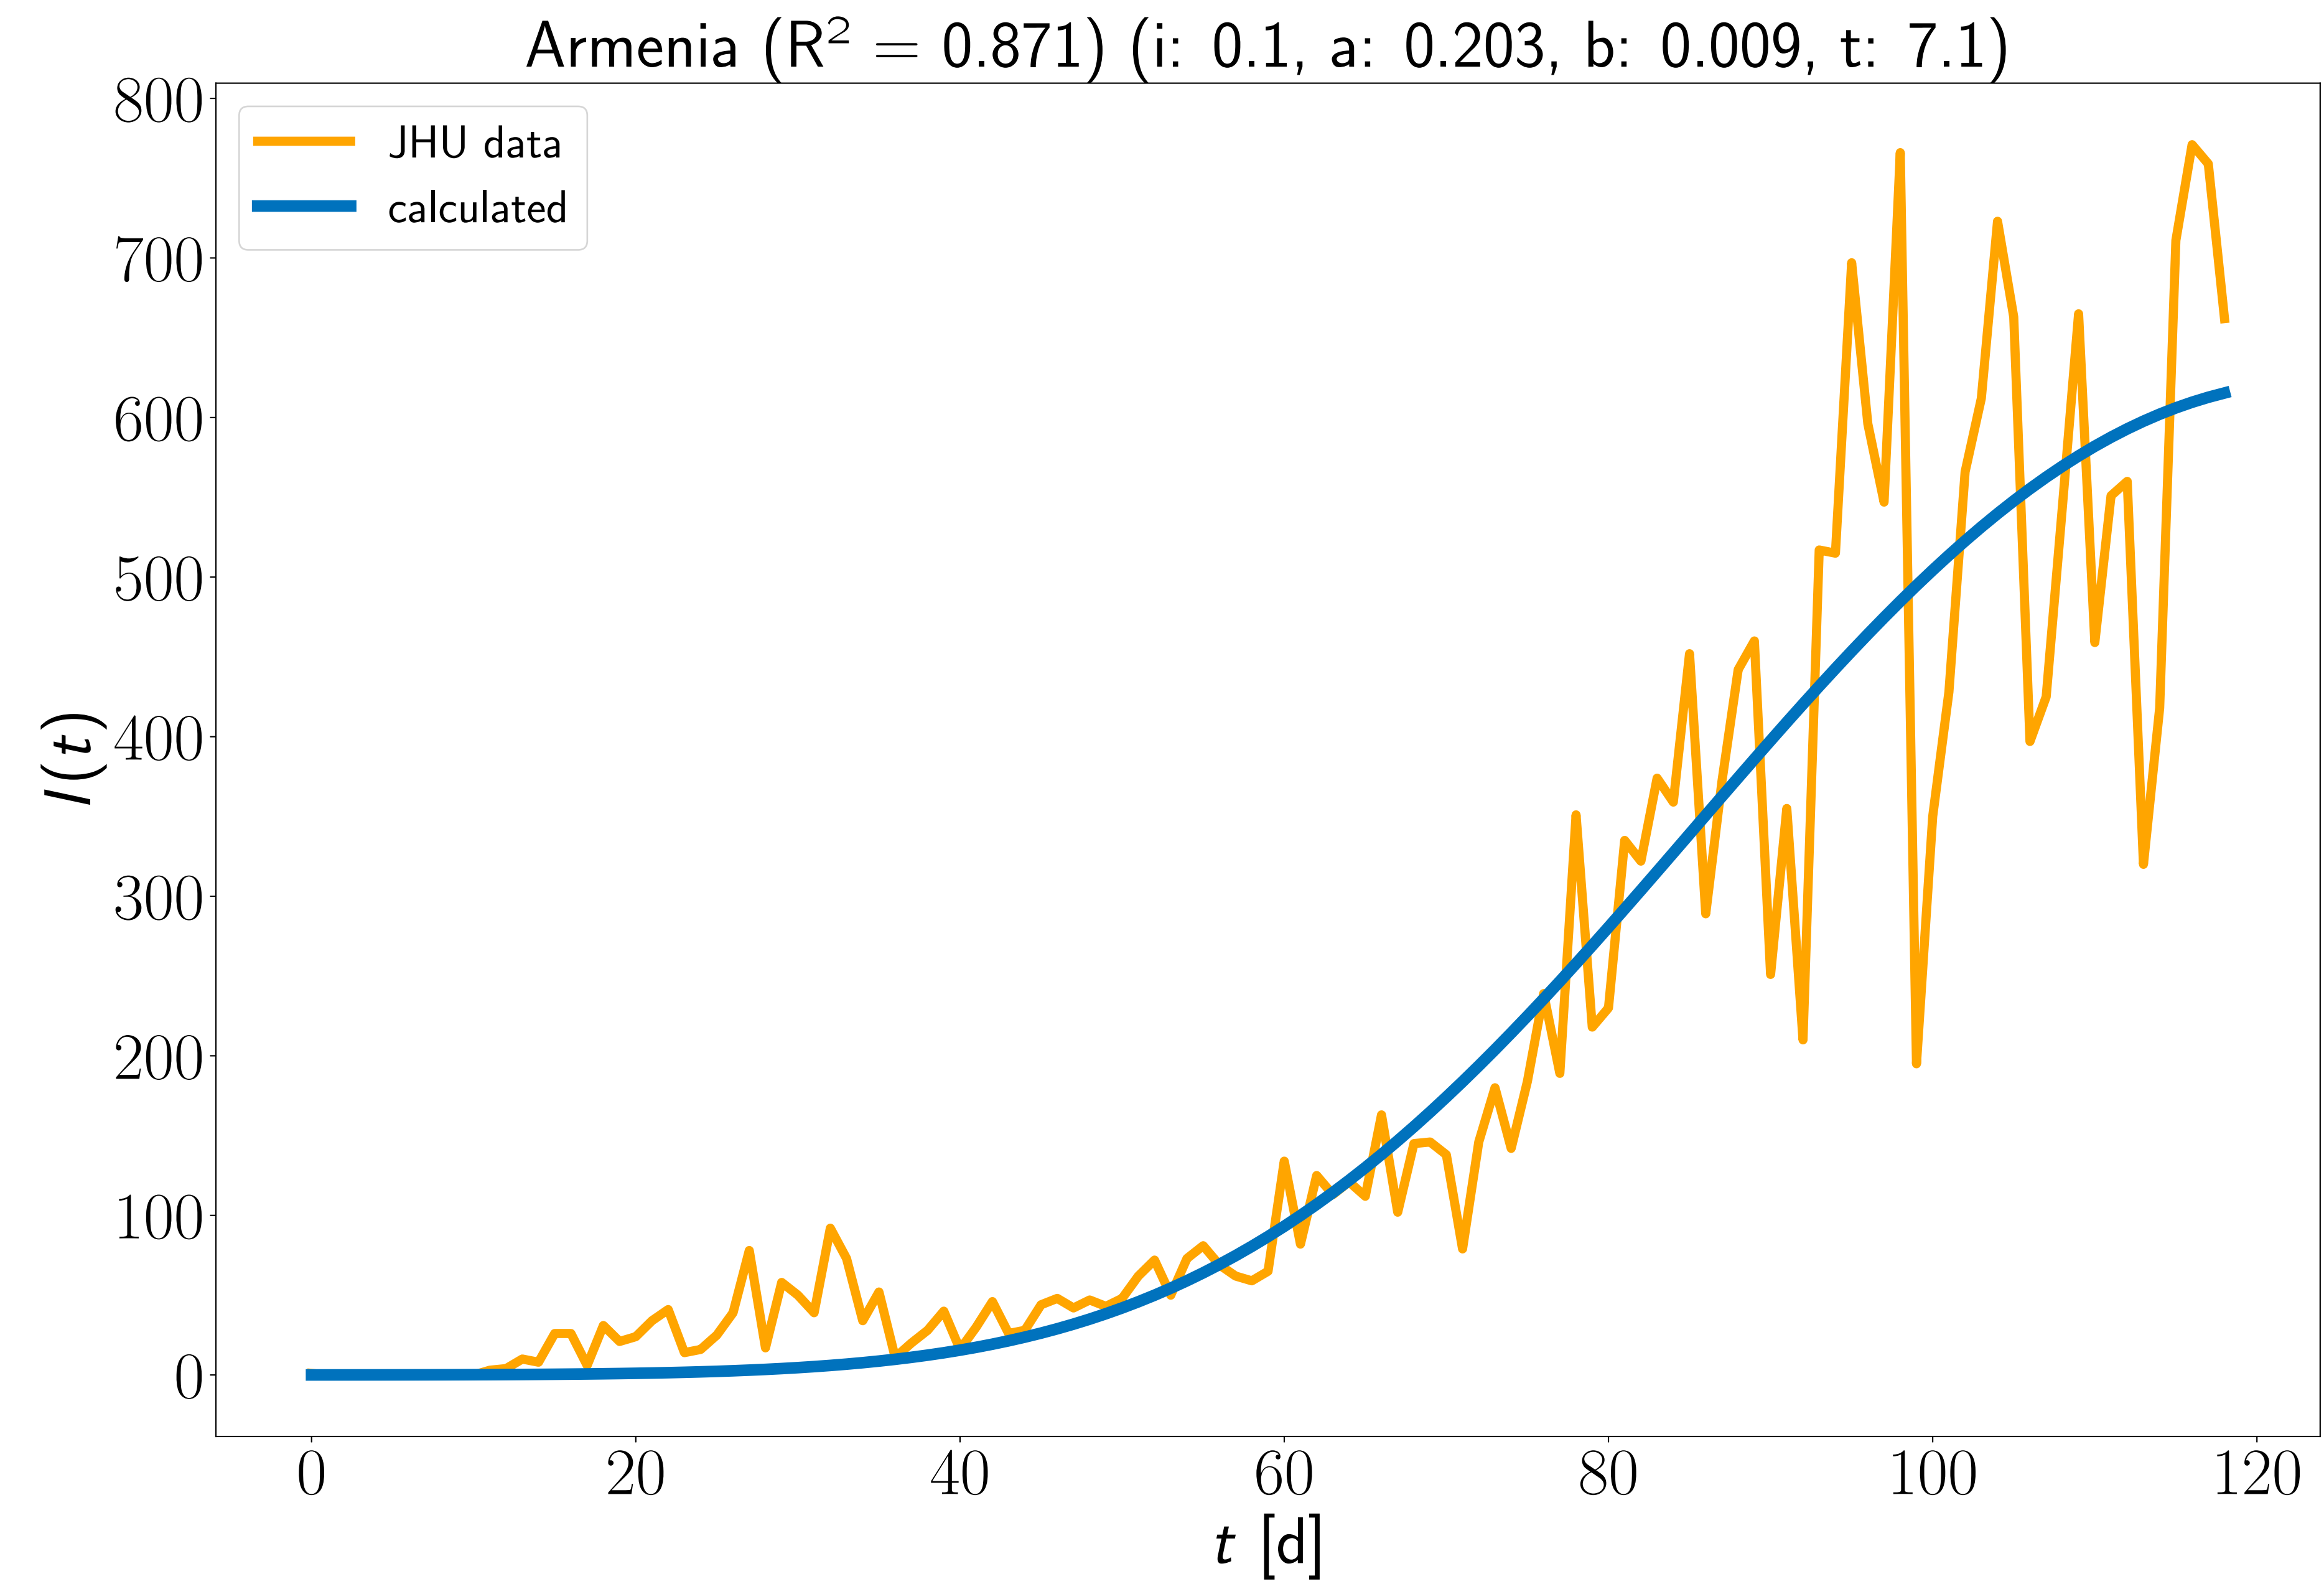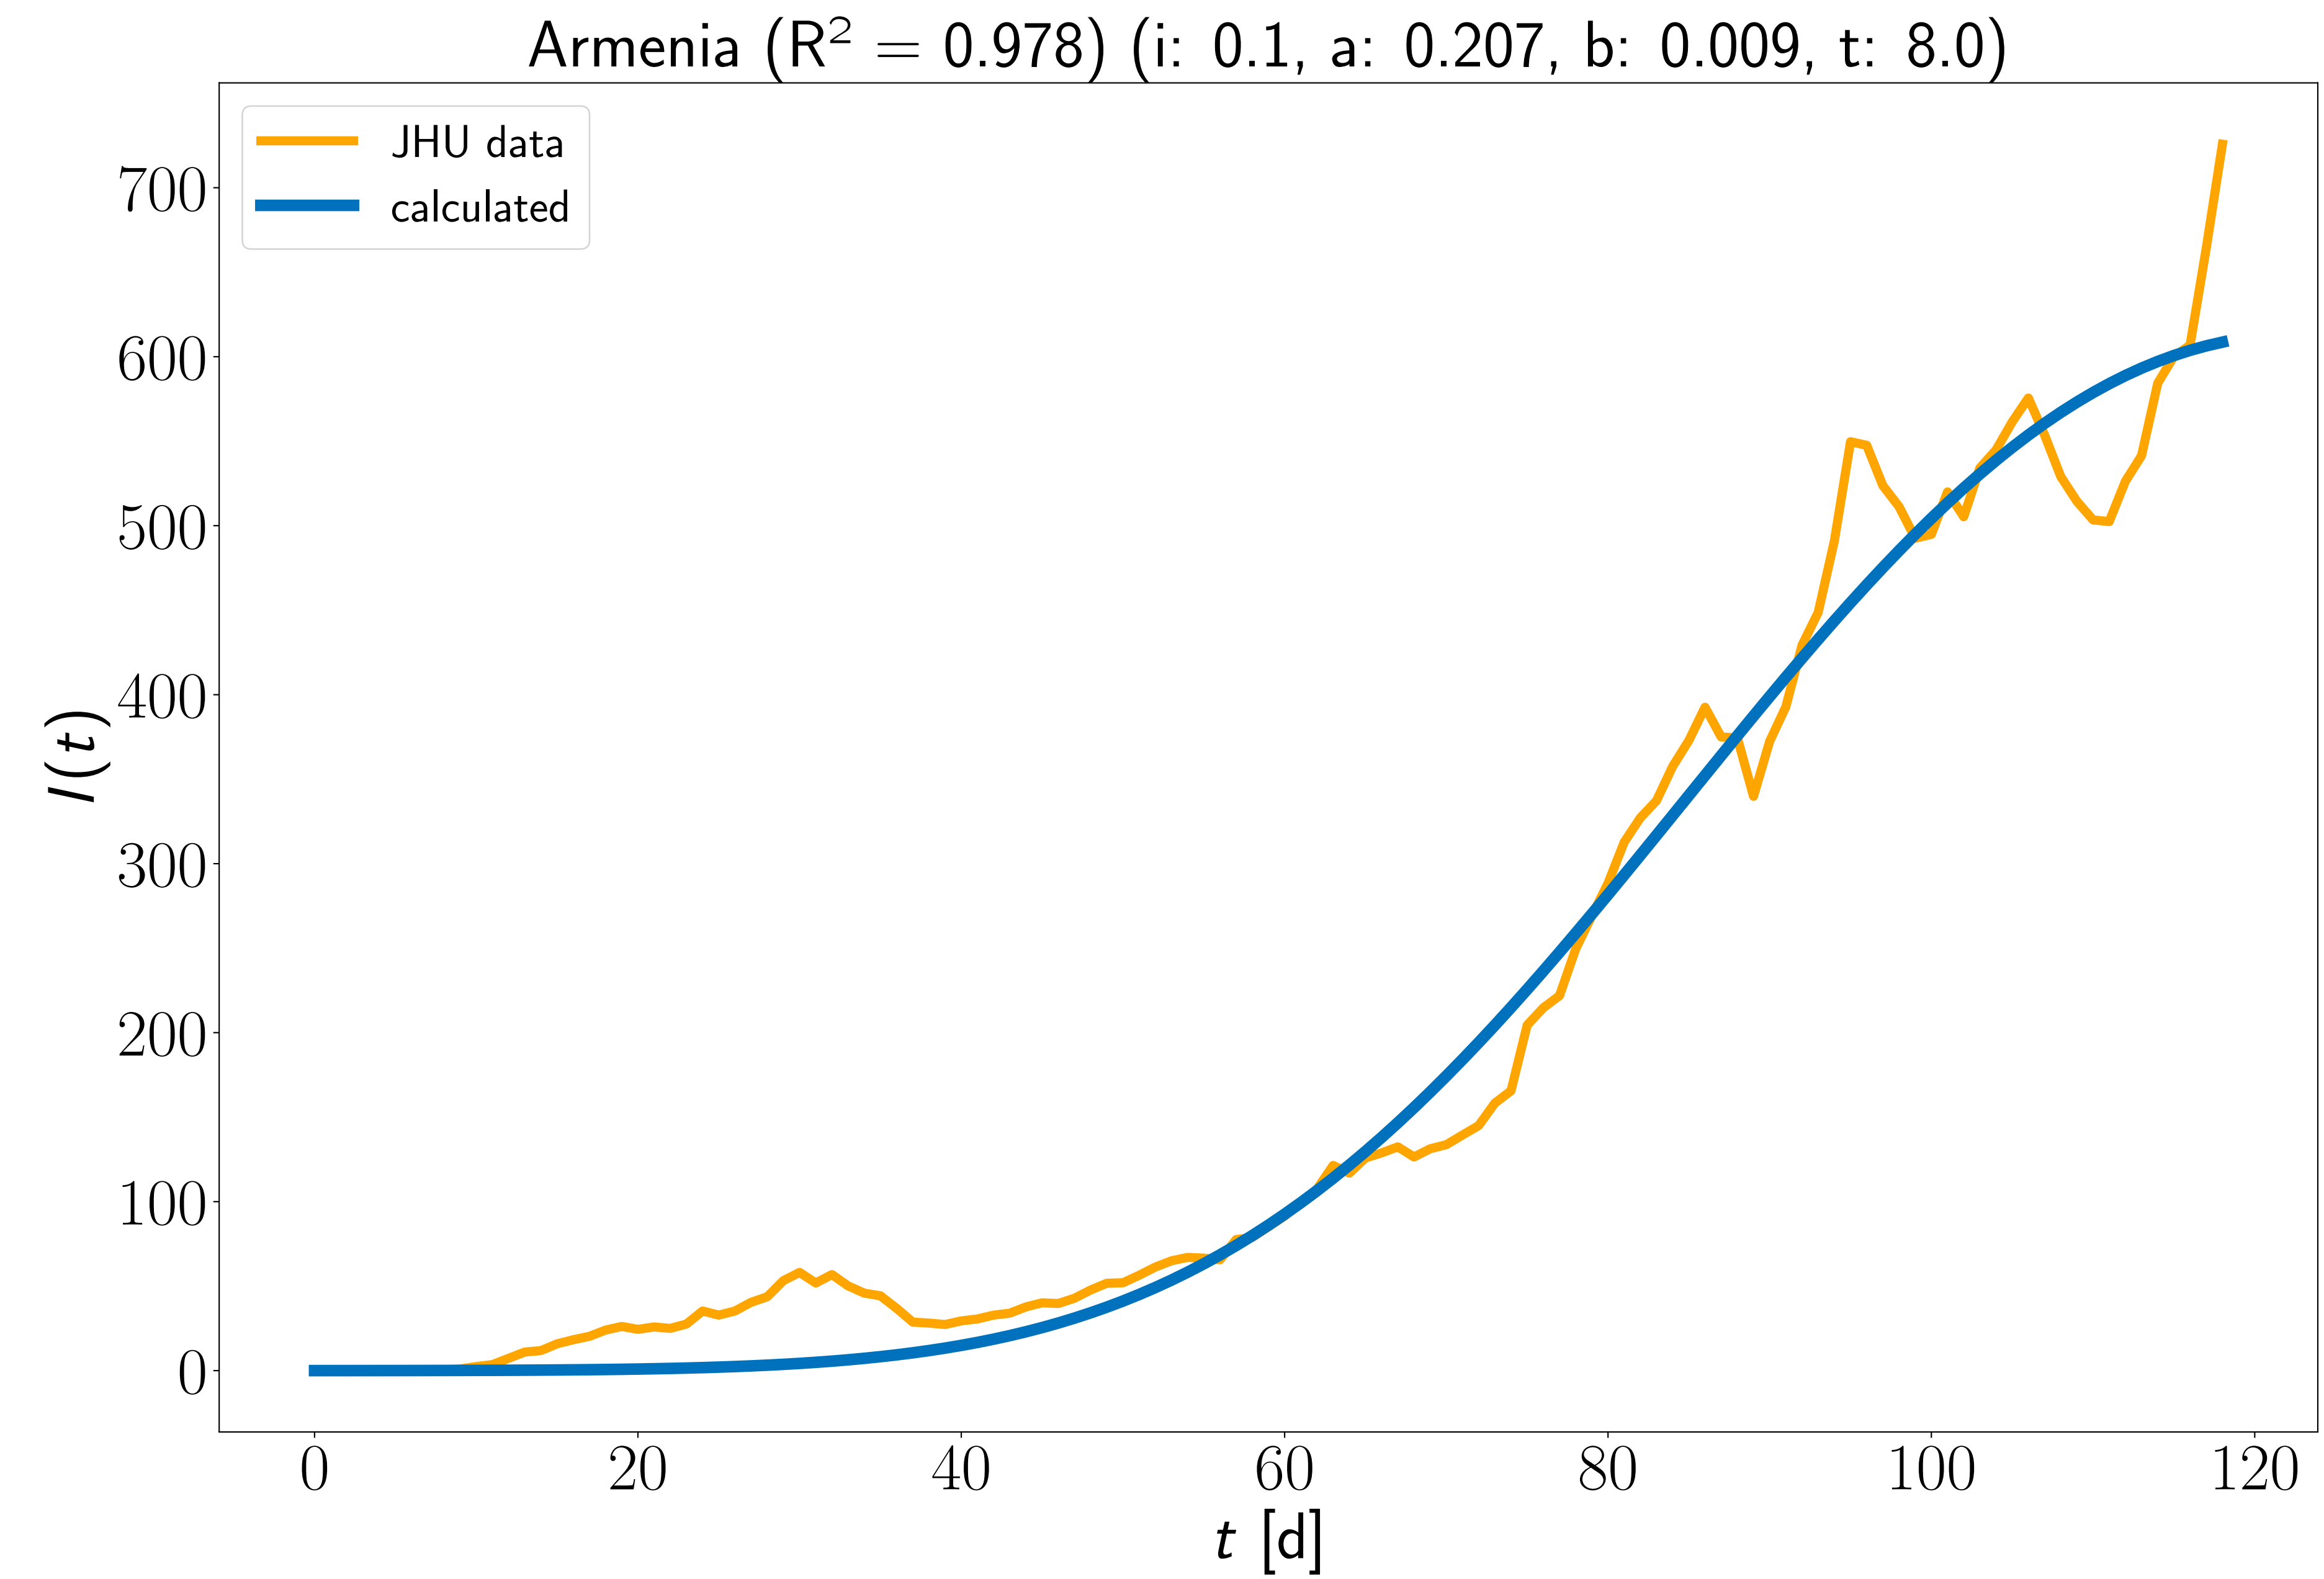

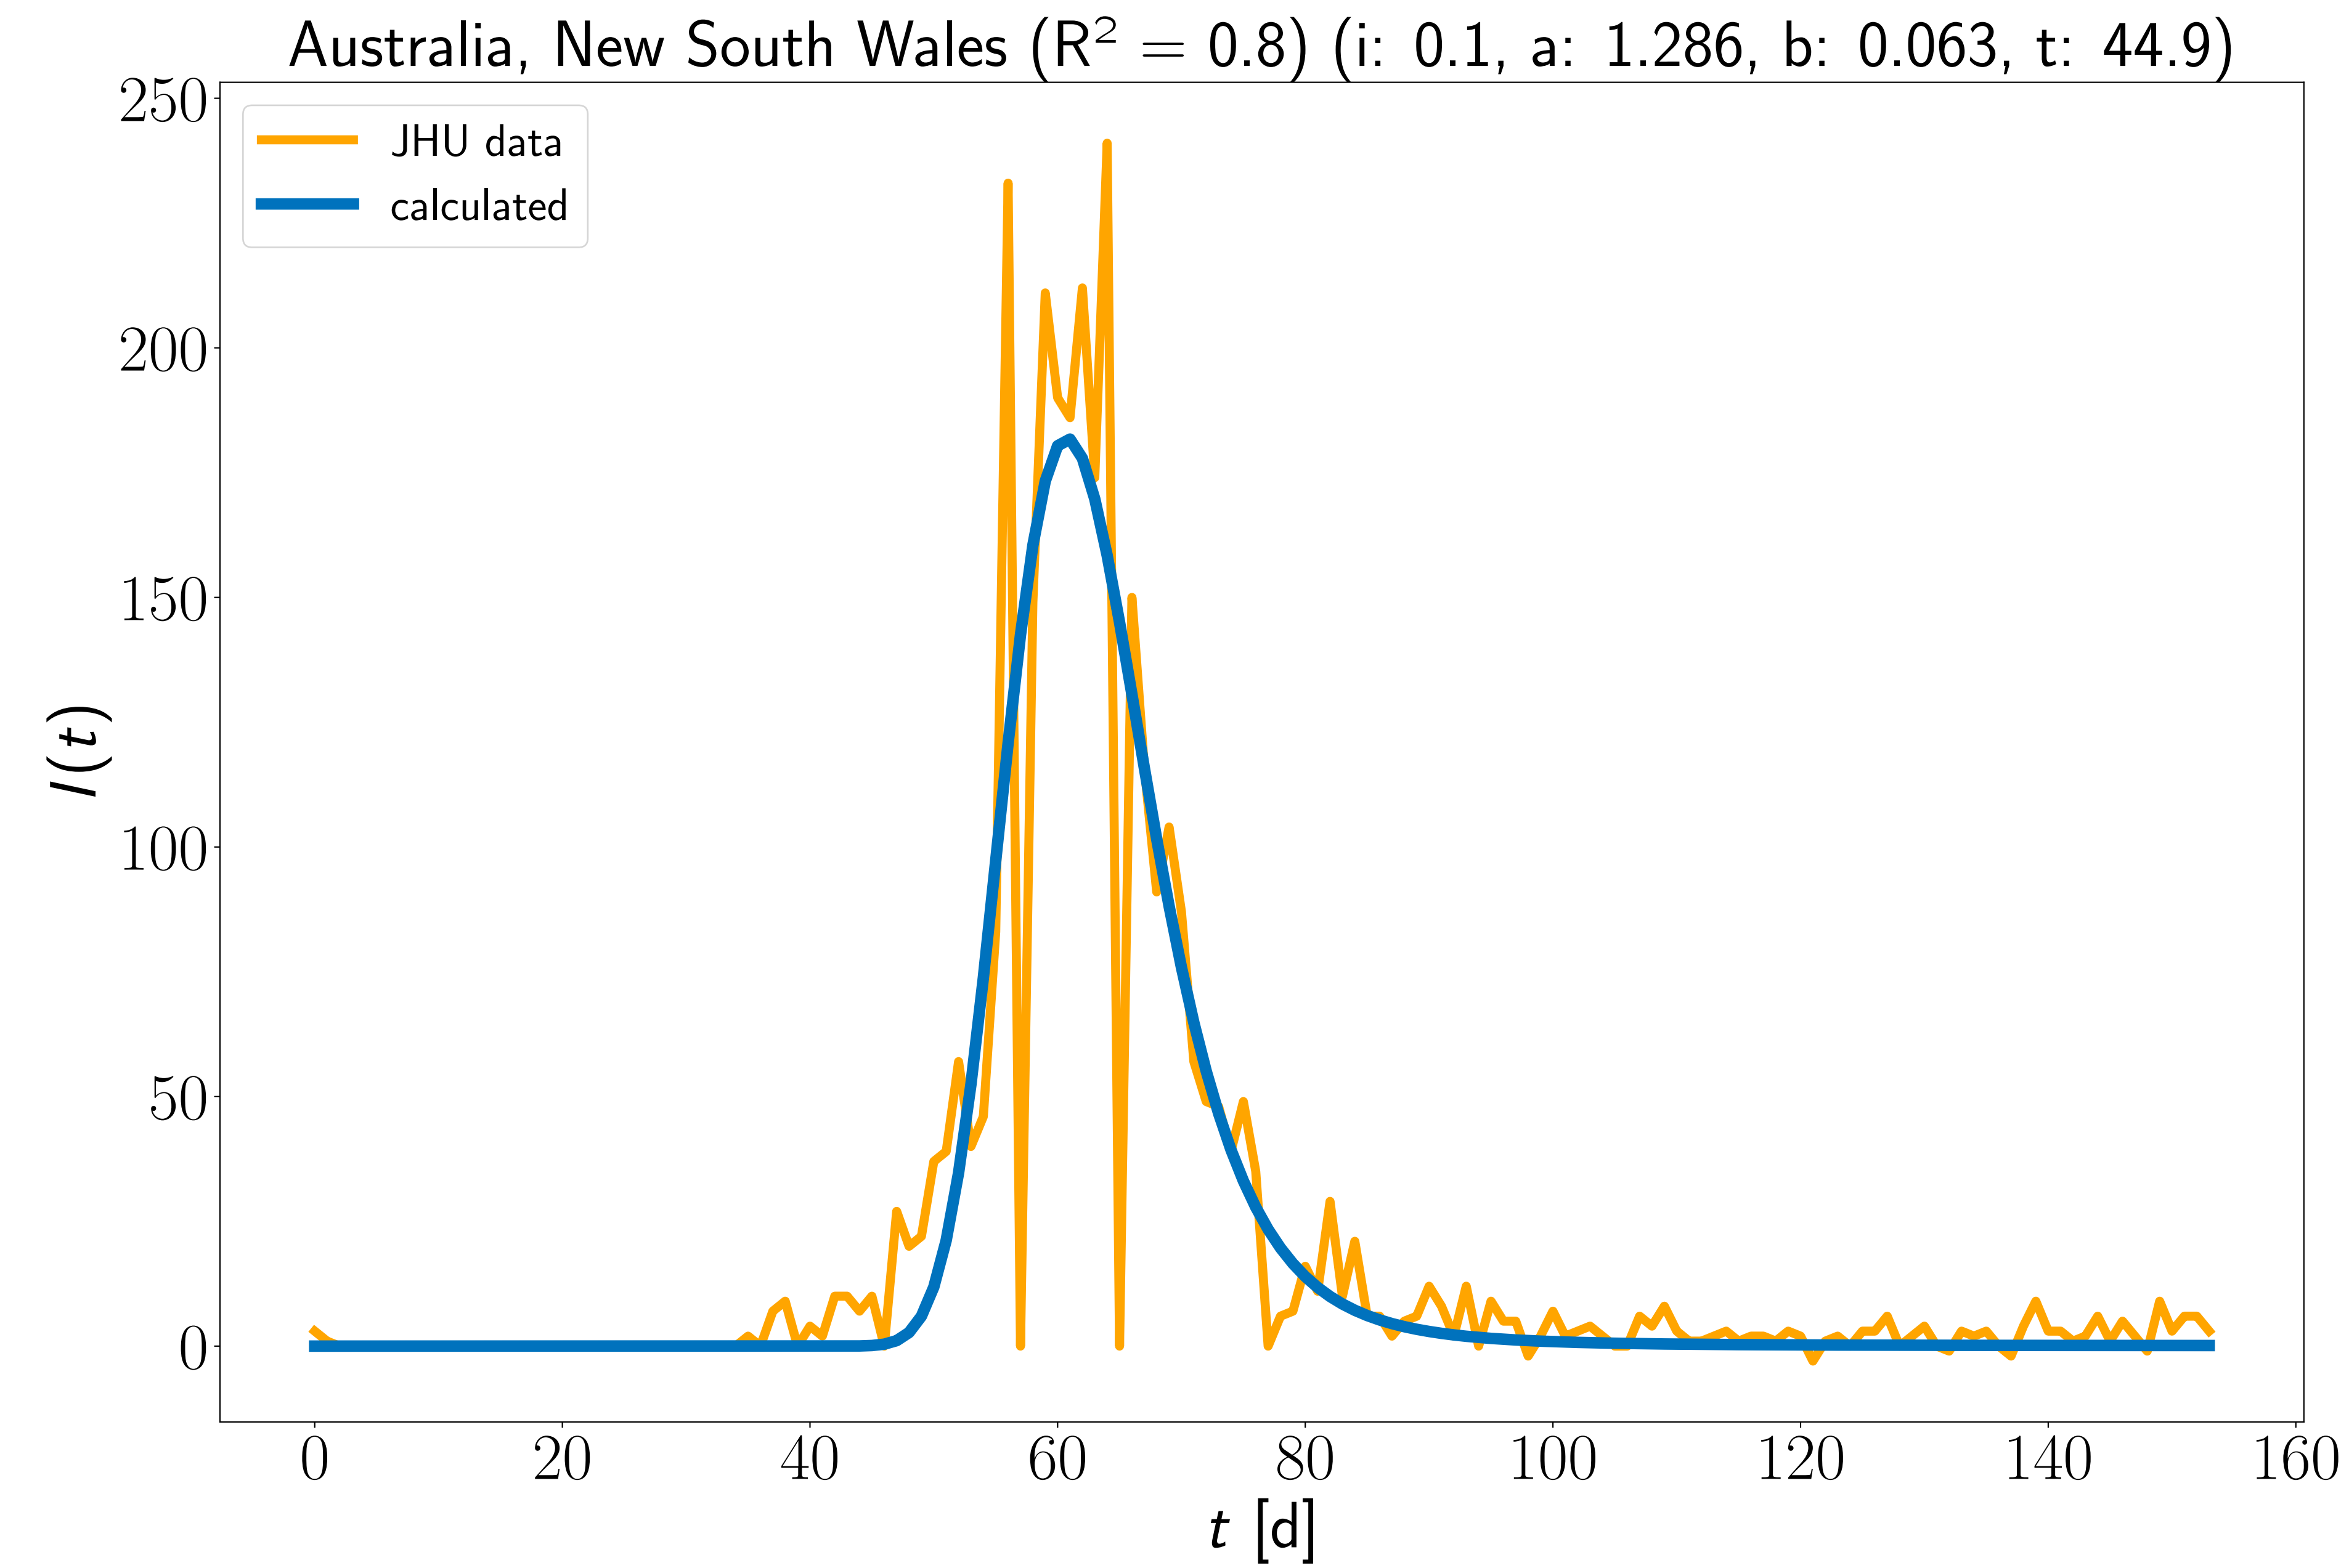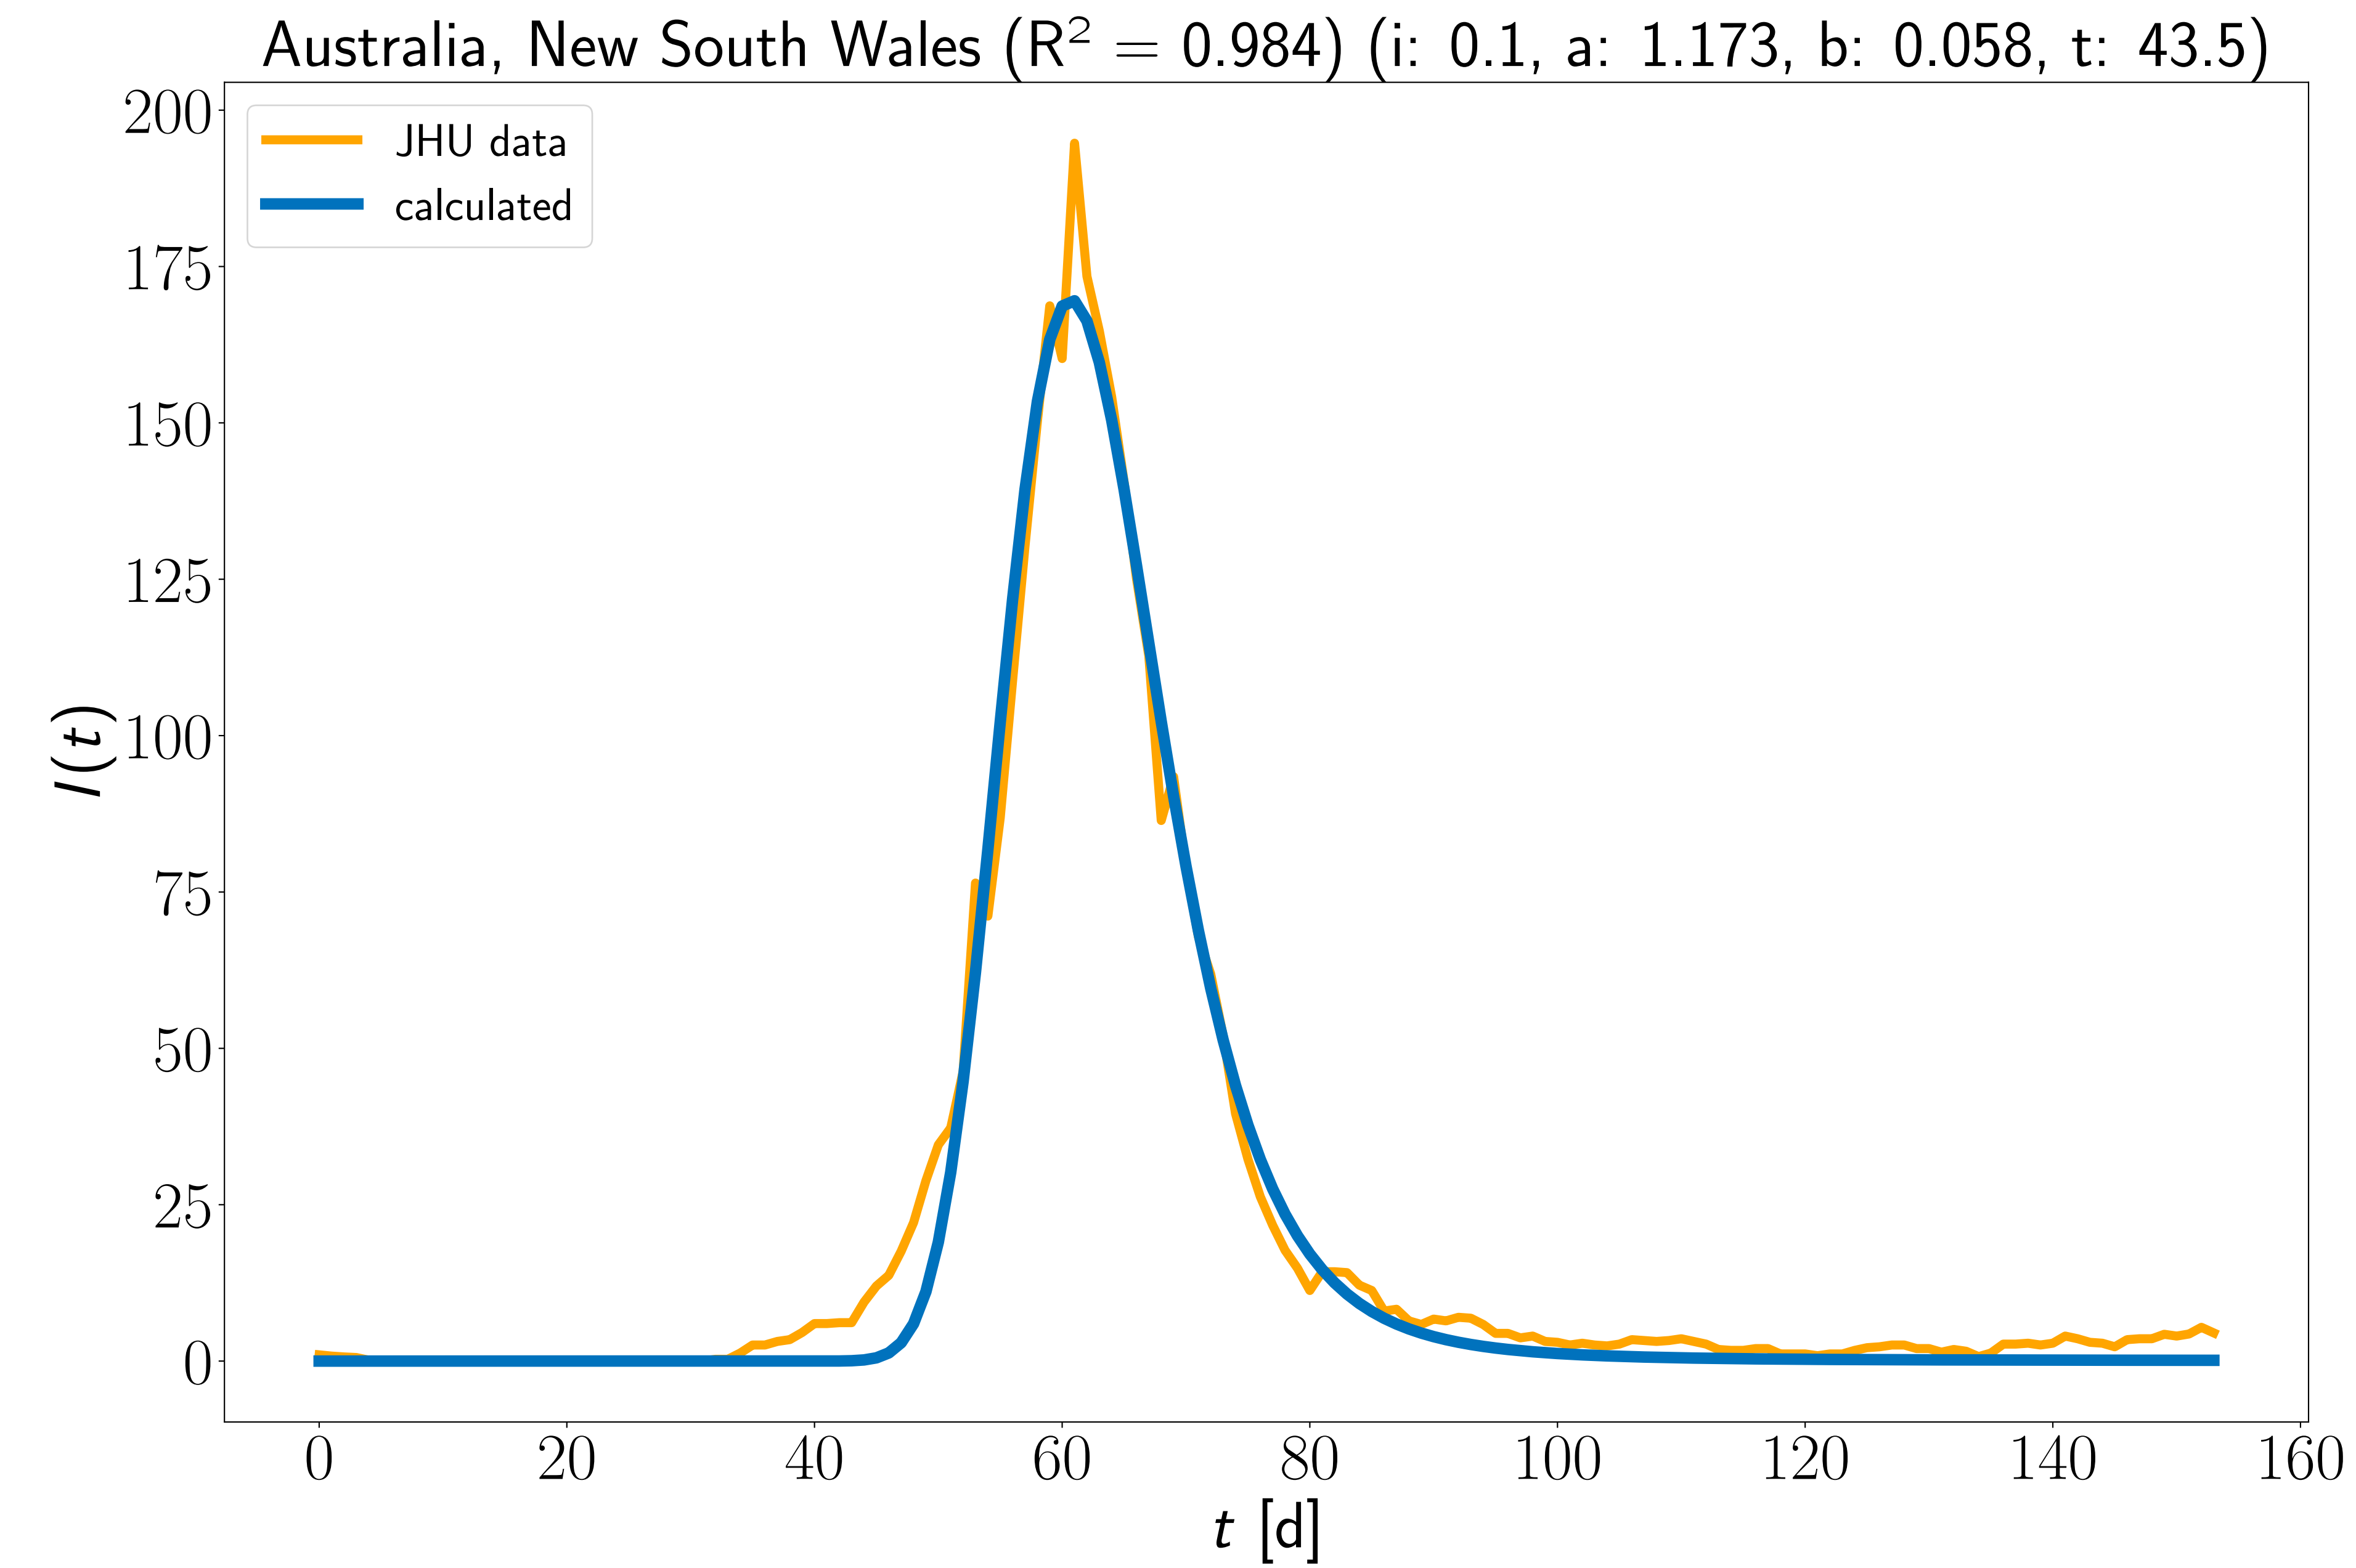

Austria ( $R^2 = 0.855$ ) (i: 25.8, a: 0.755, b: 0.082, t: 16.9)

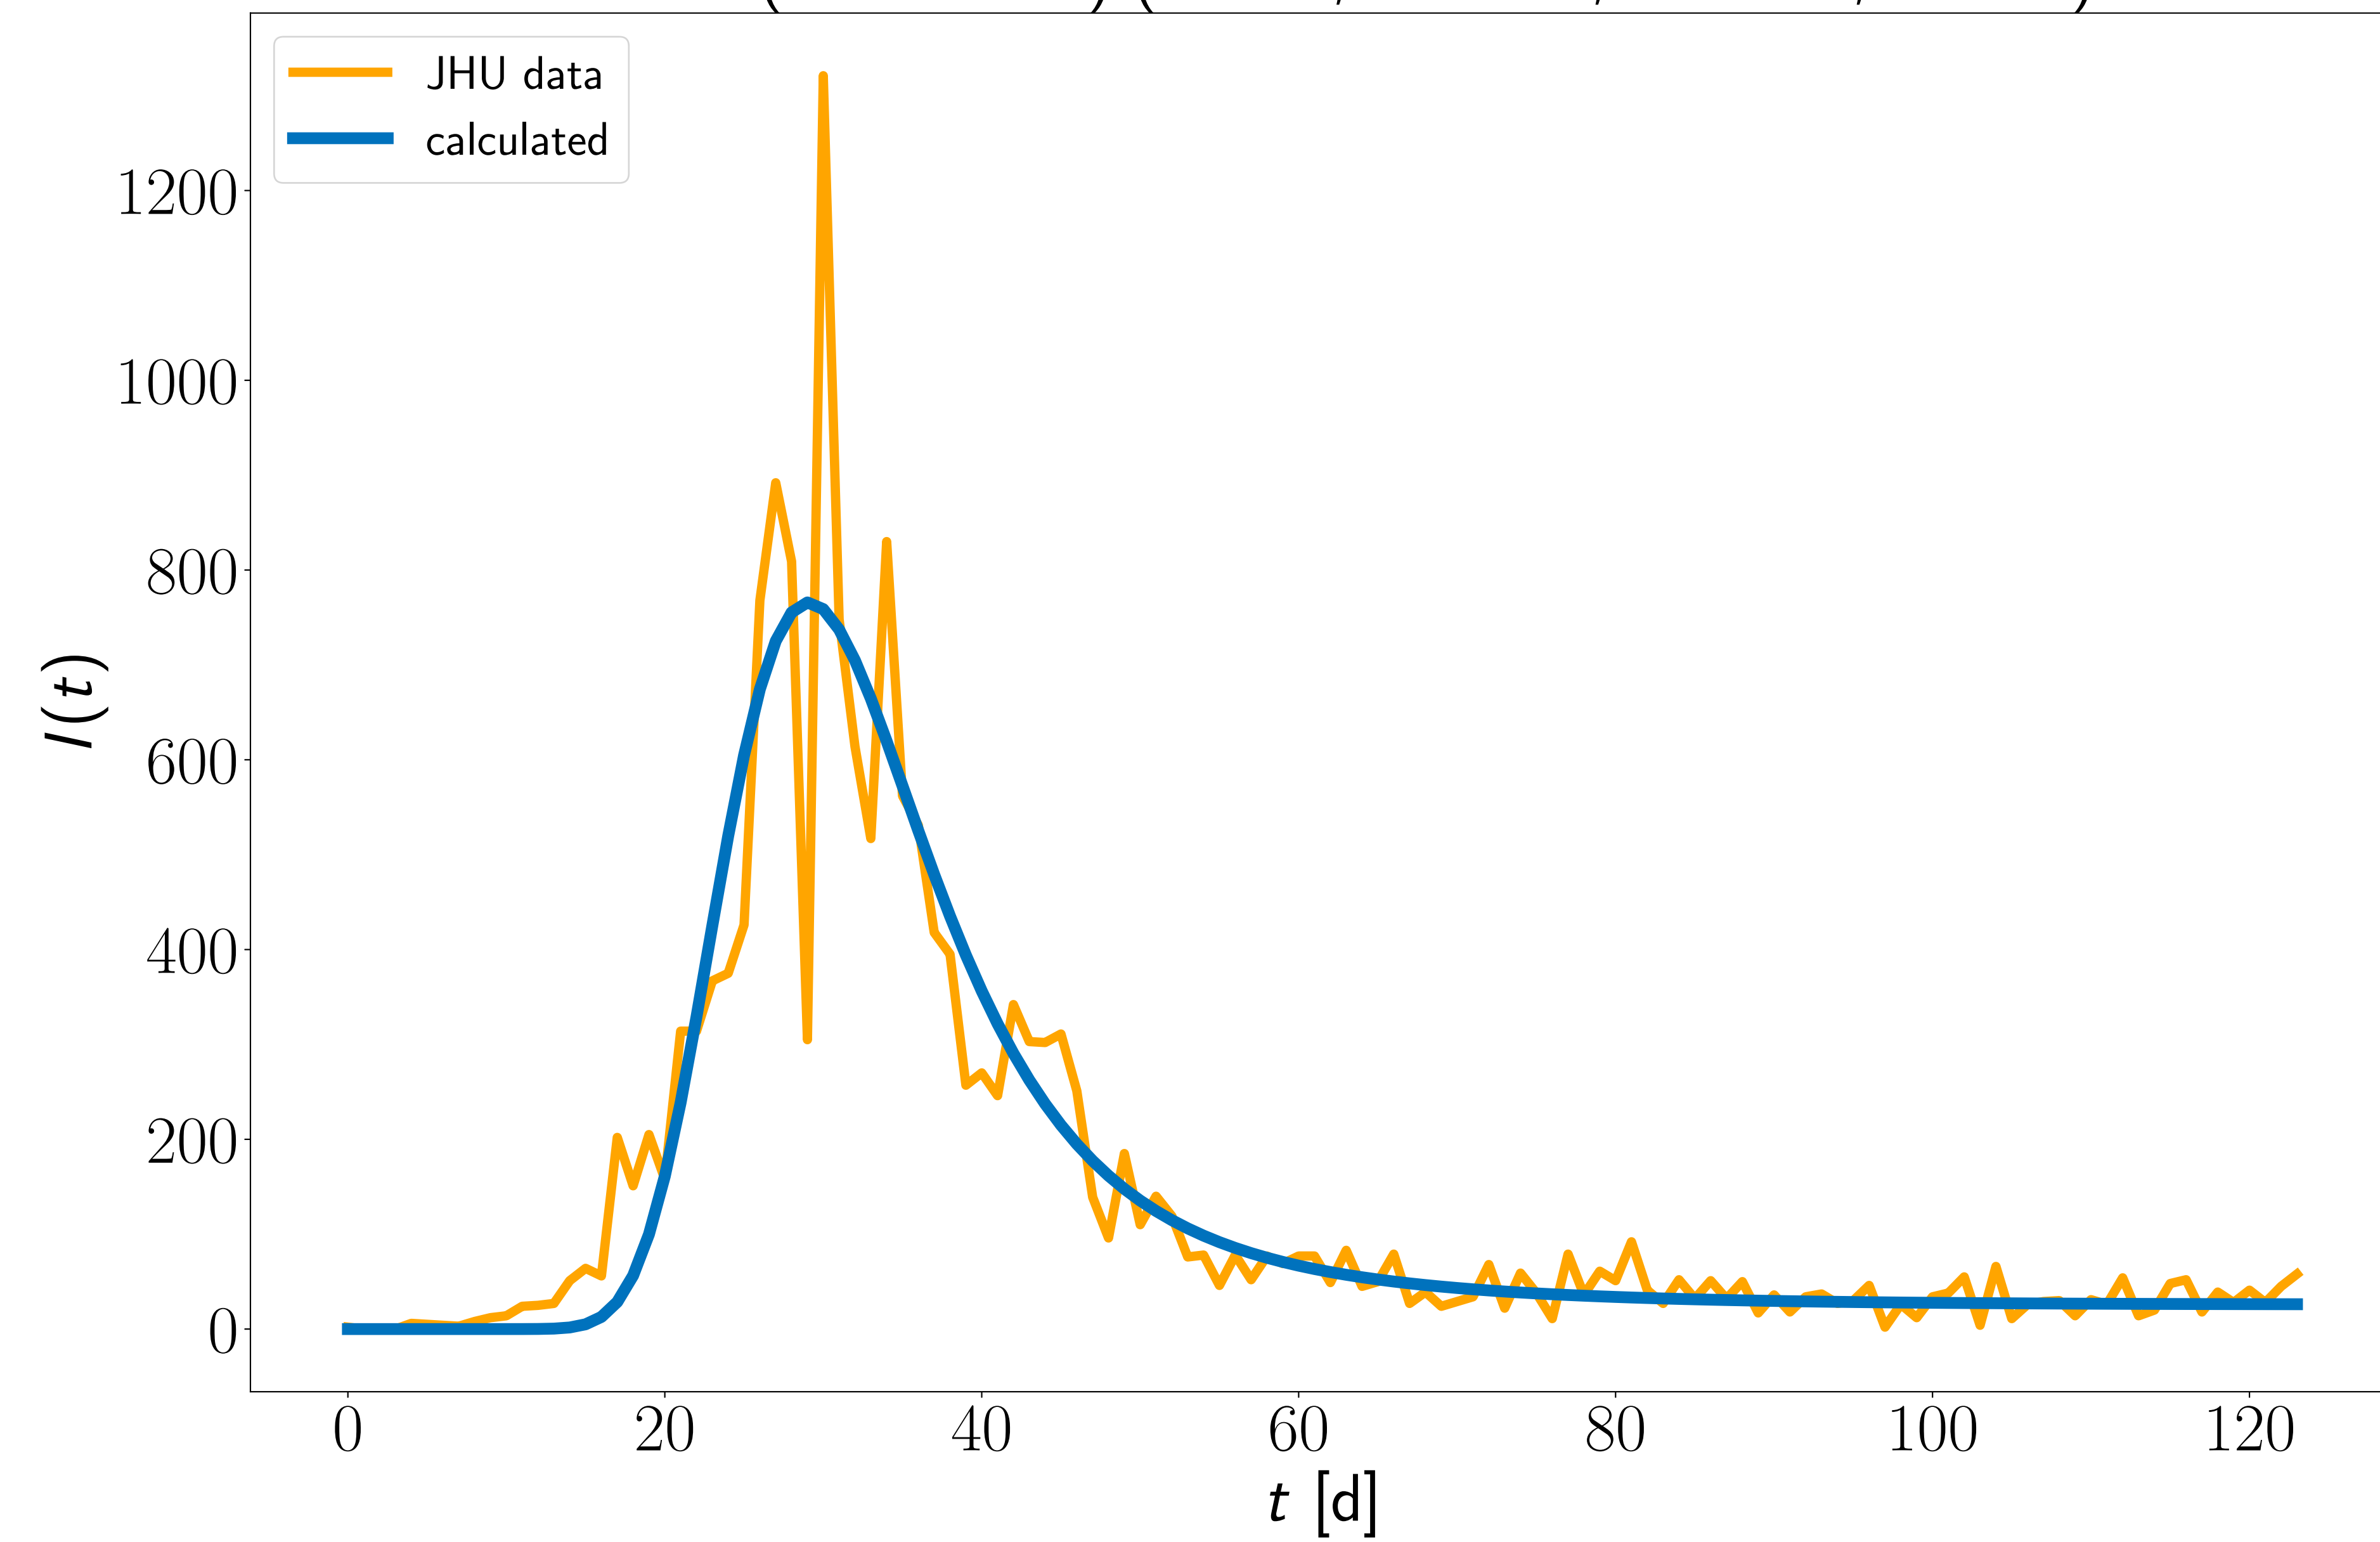

Austria ( $R^2 = 0.982$ ) (i: 22.3, a: 0.706, b: 0.075, t: 15.7)

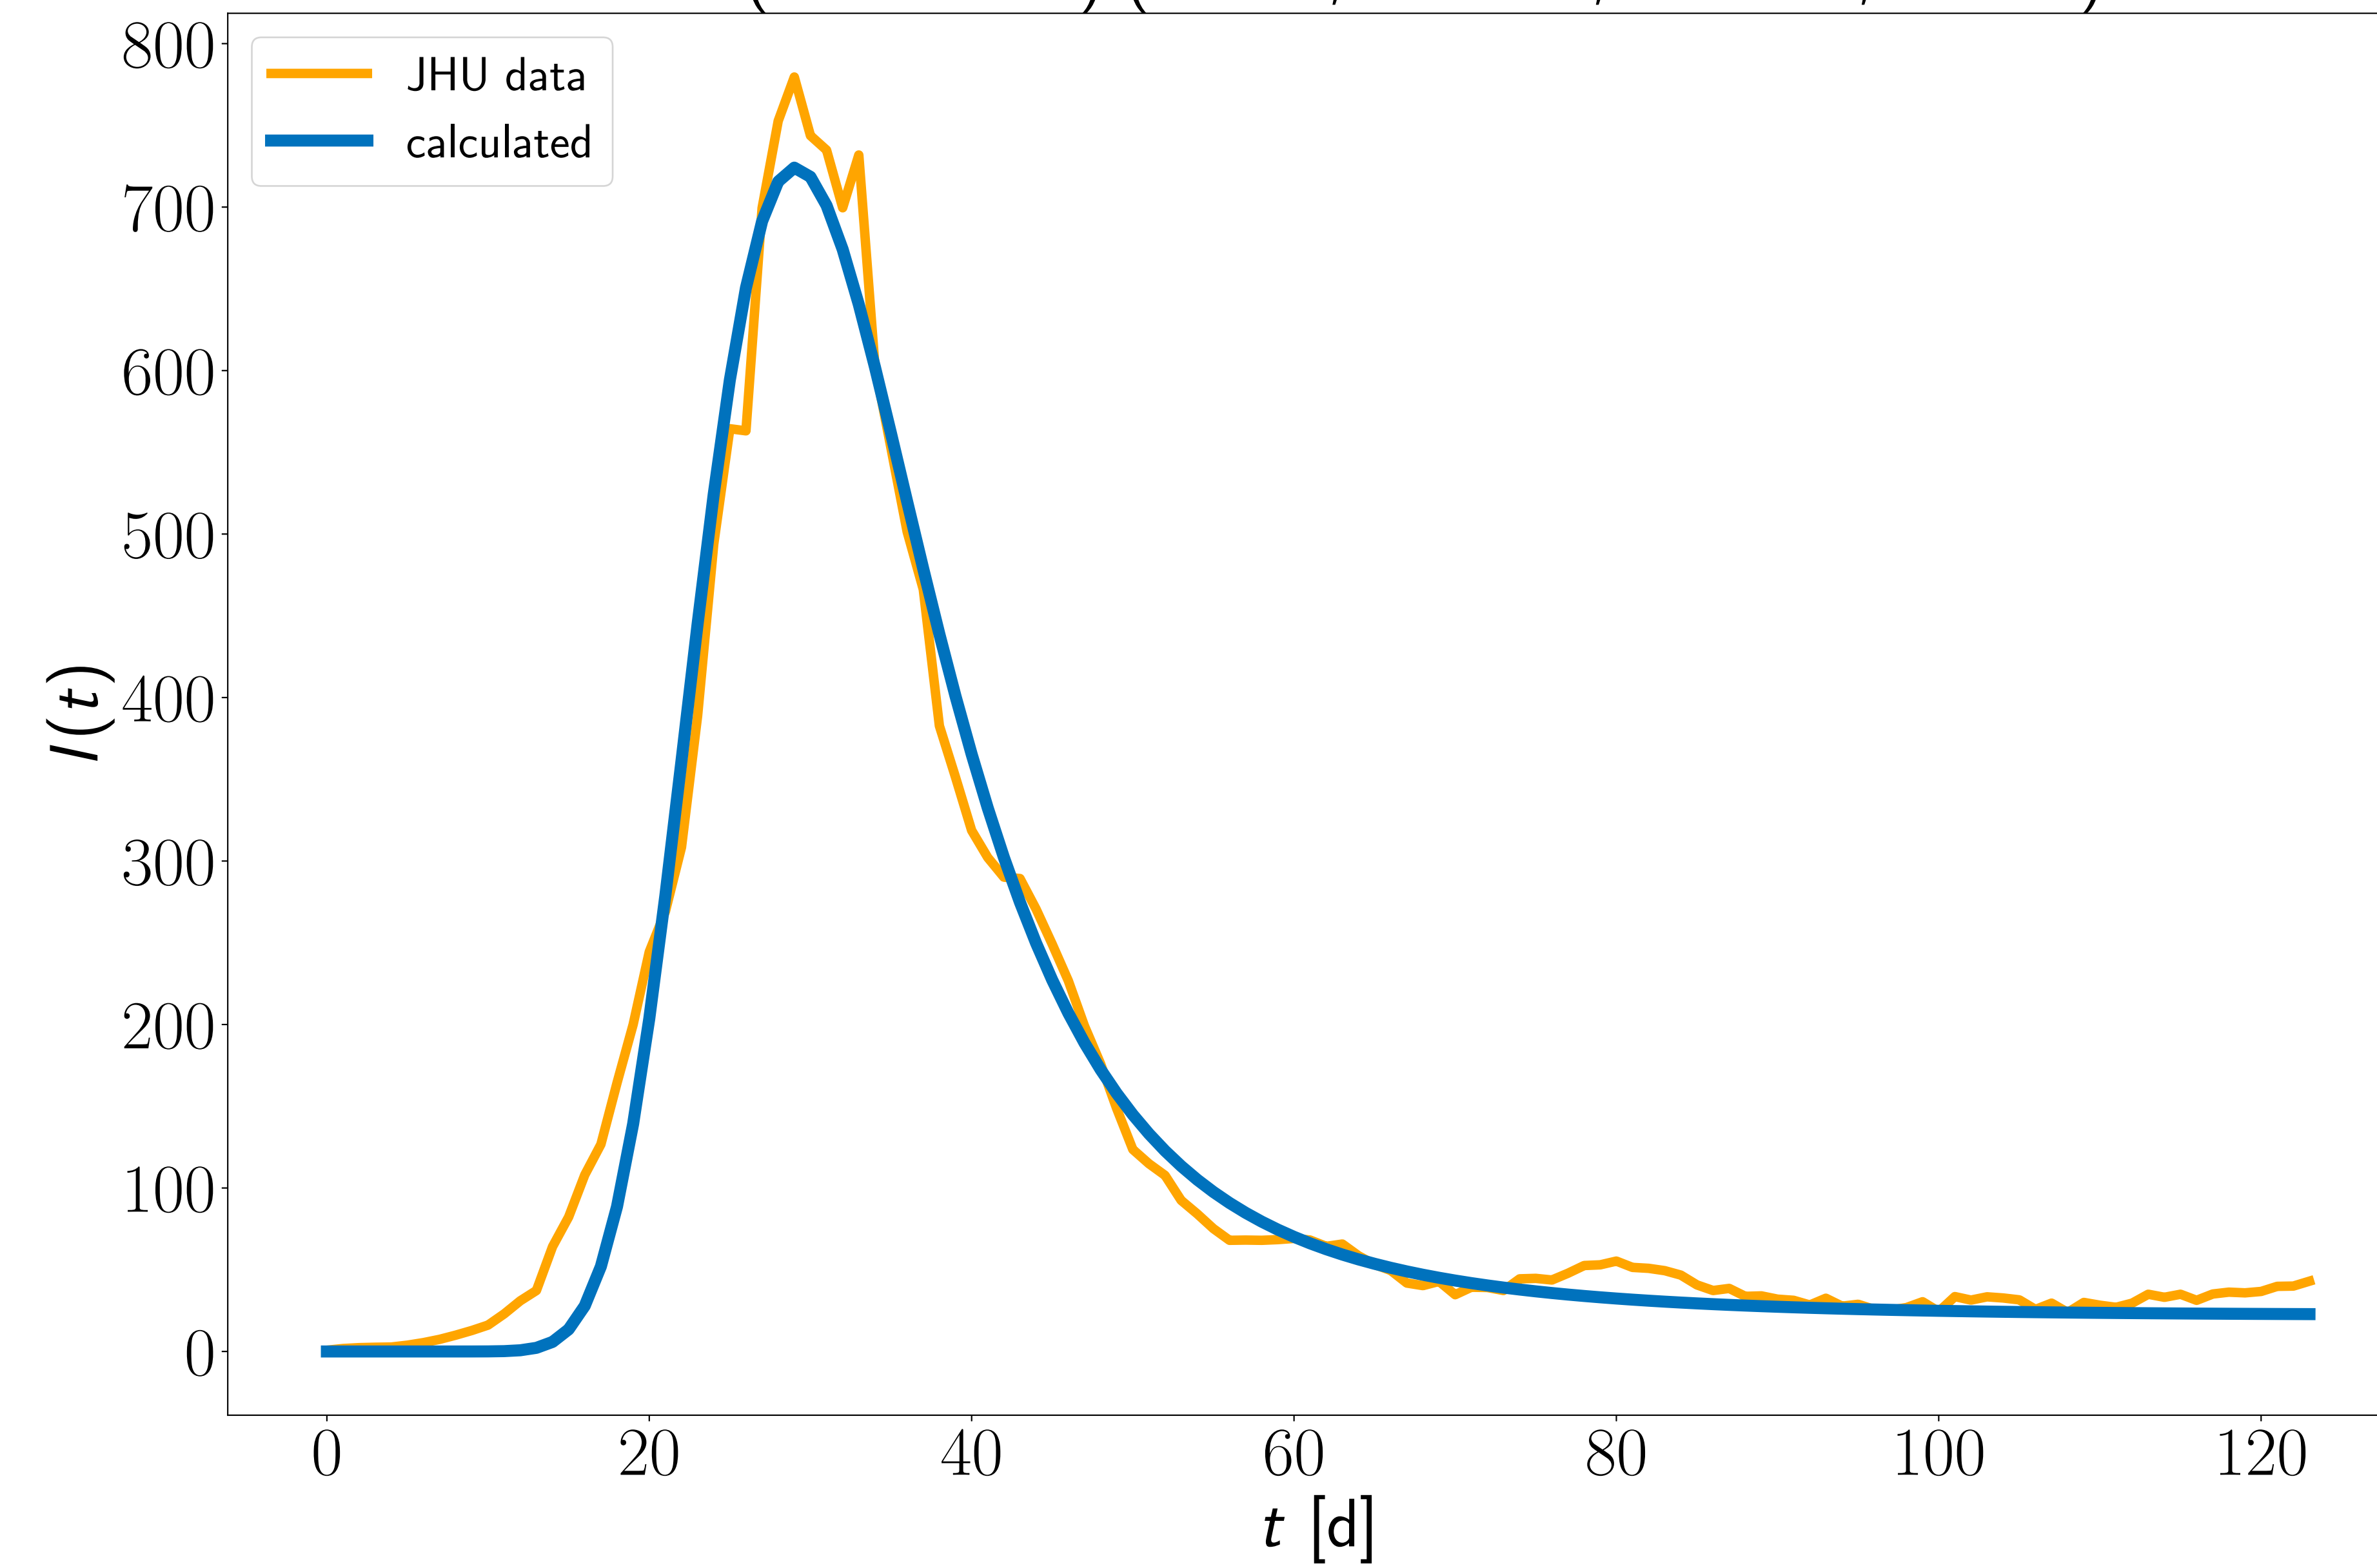

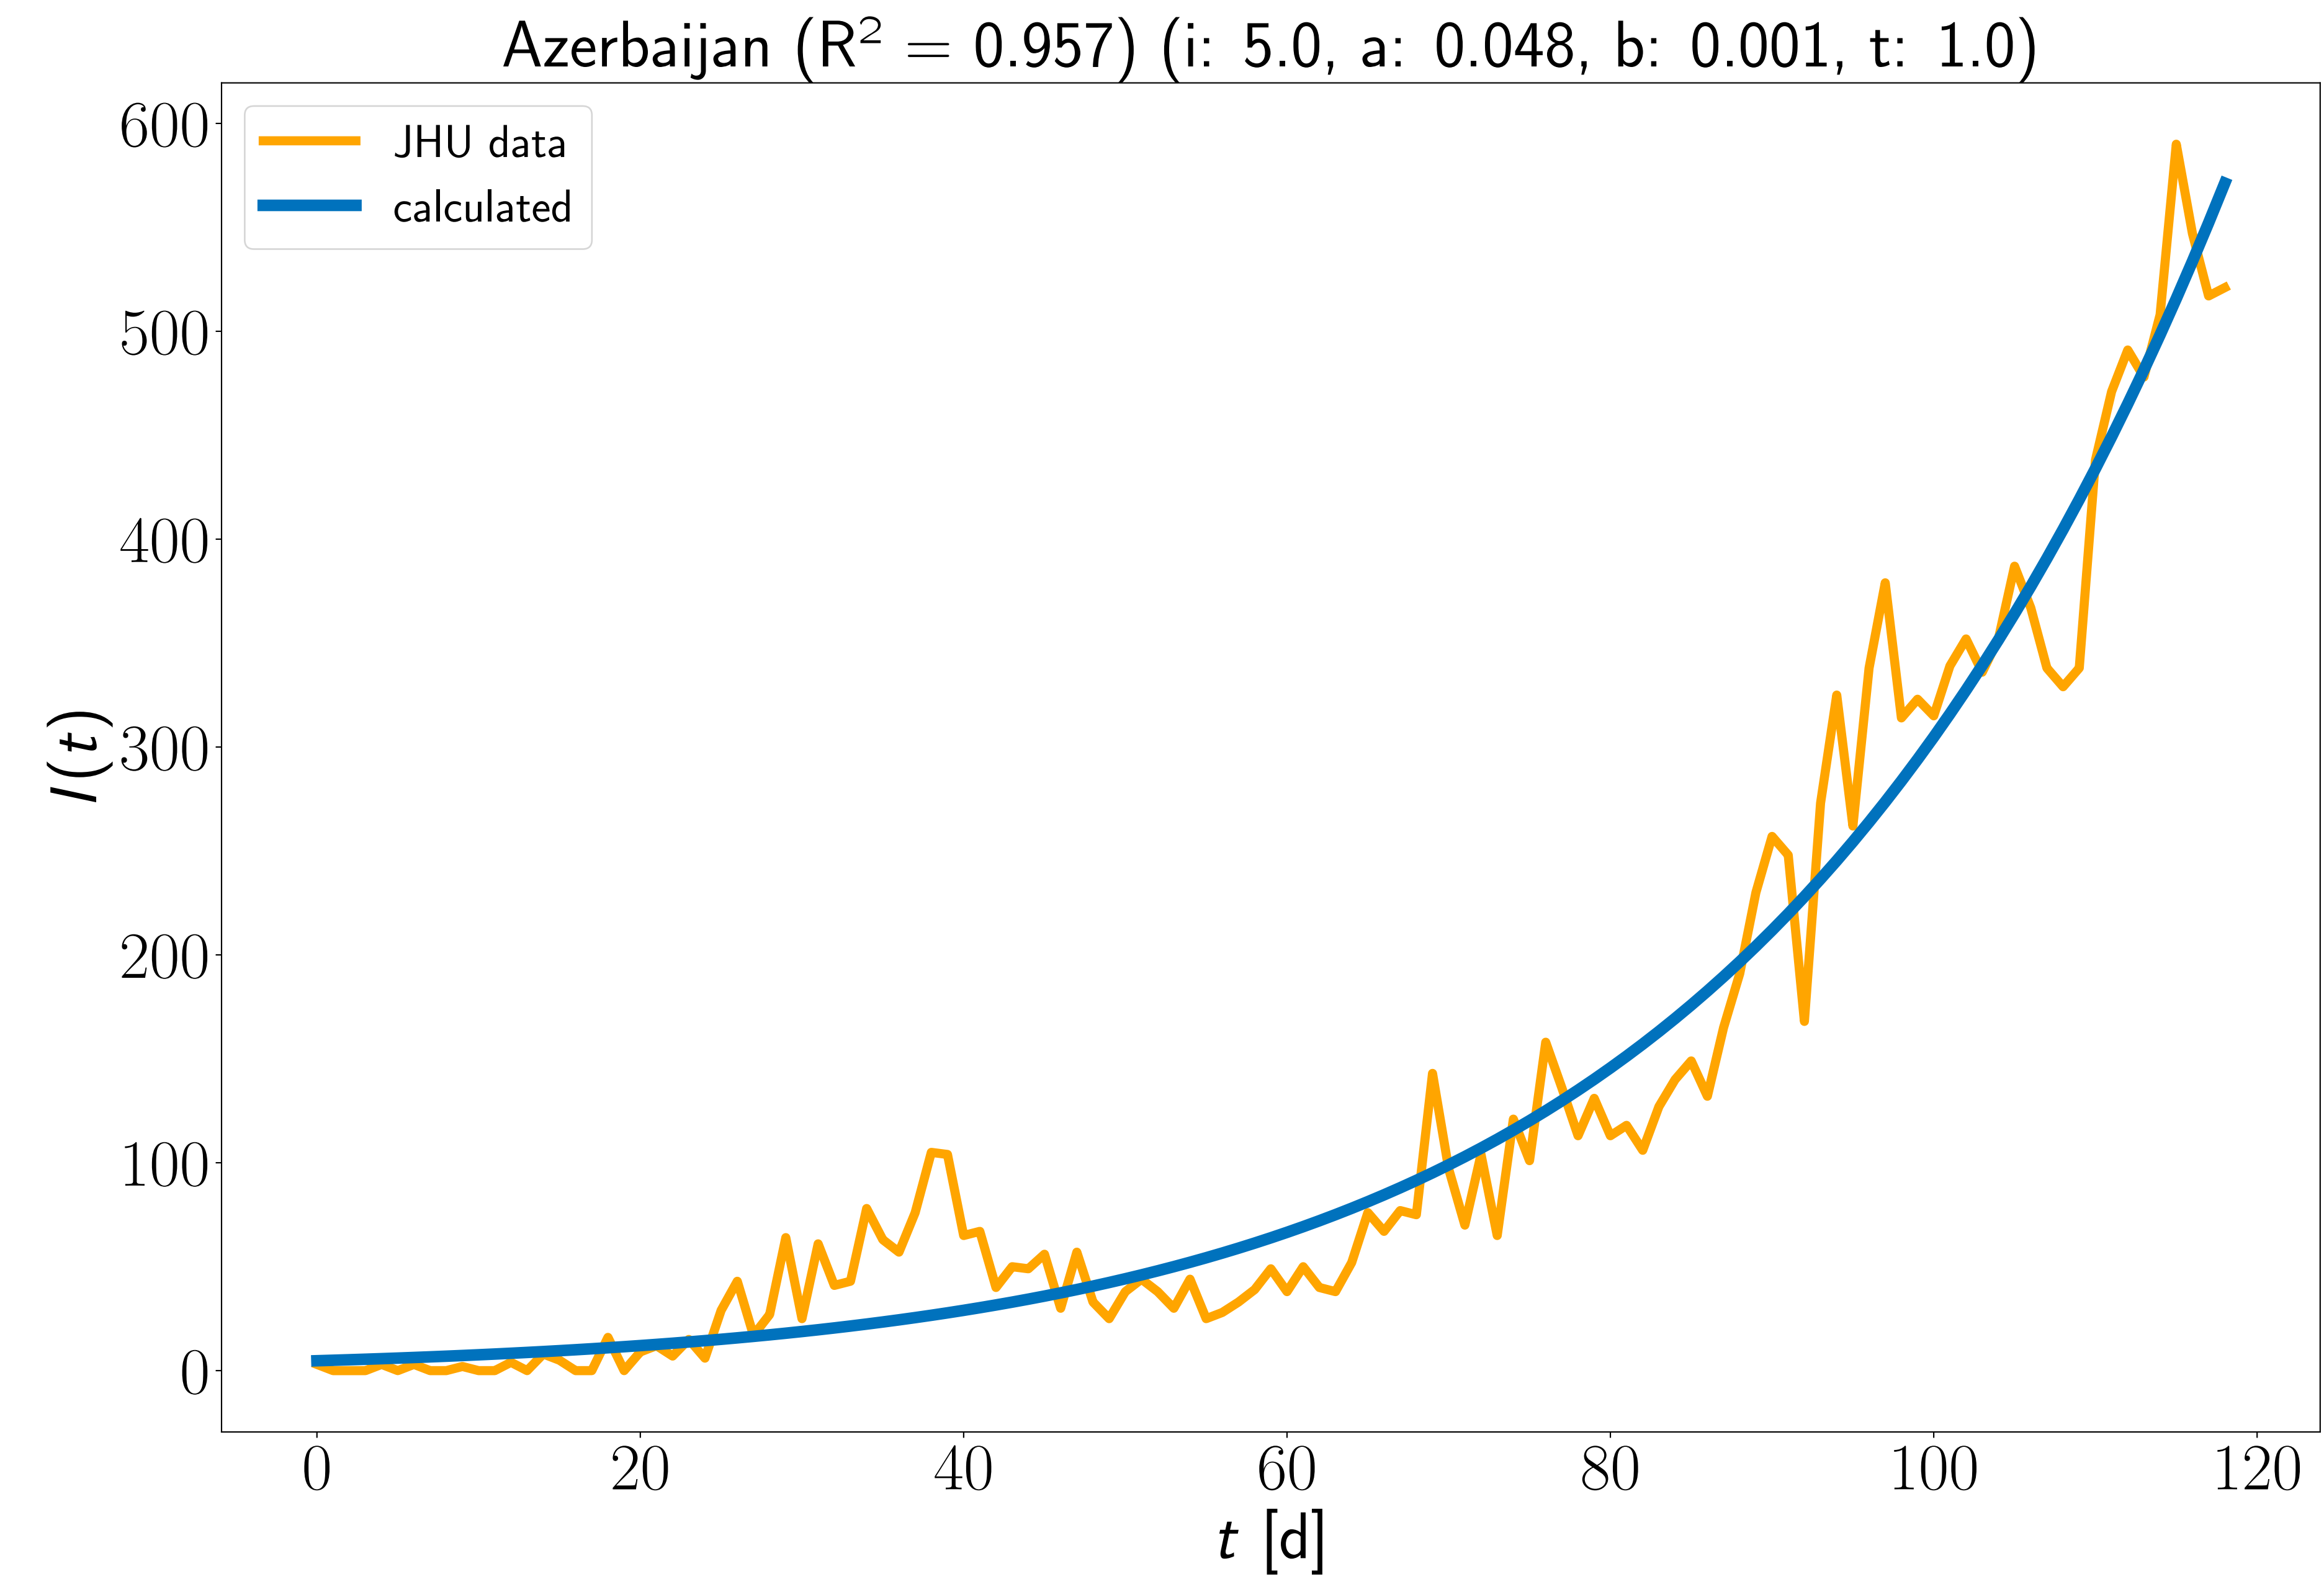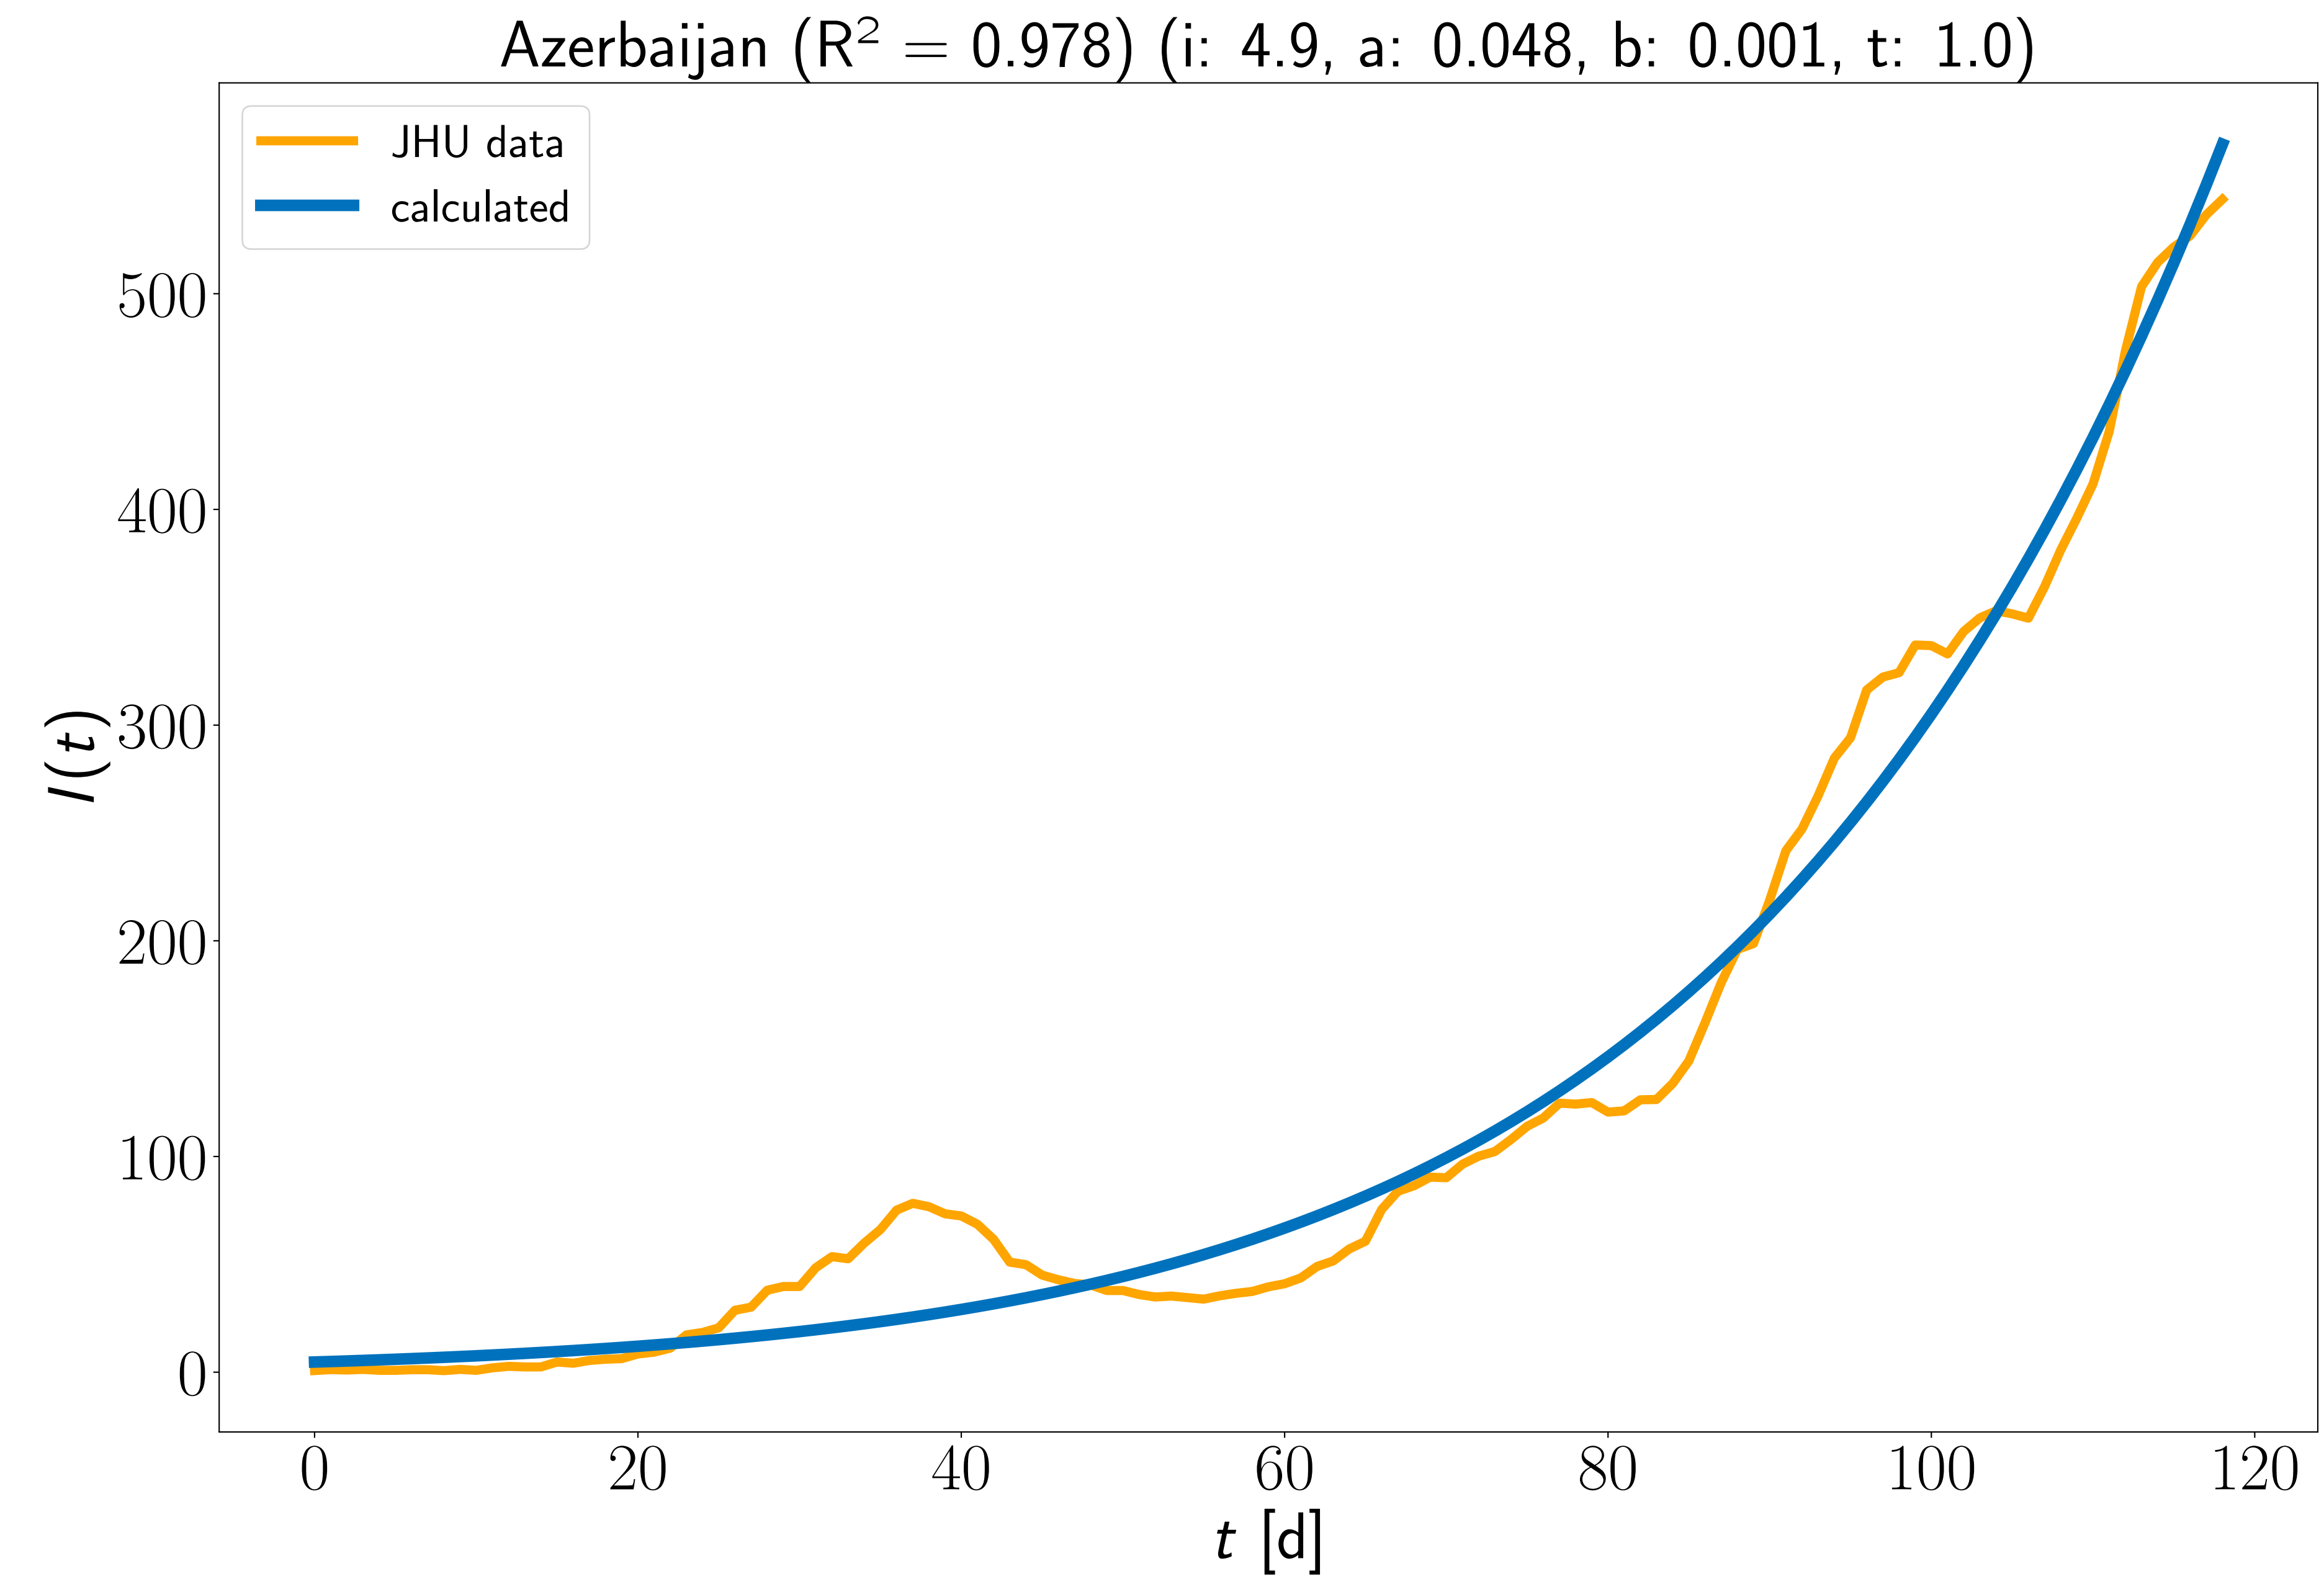

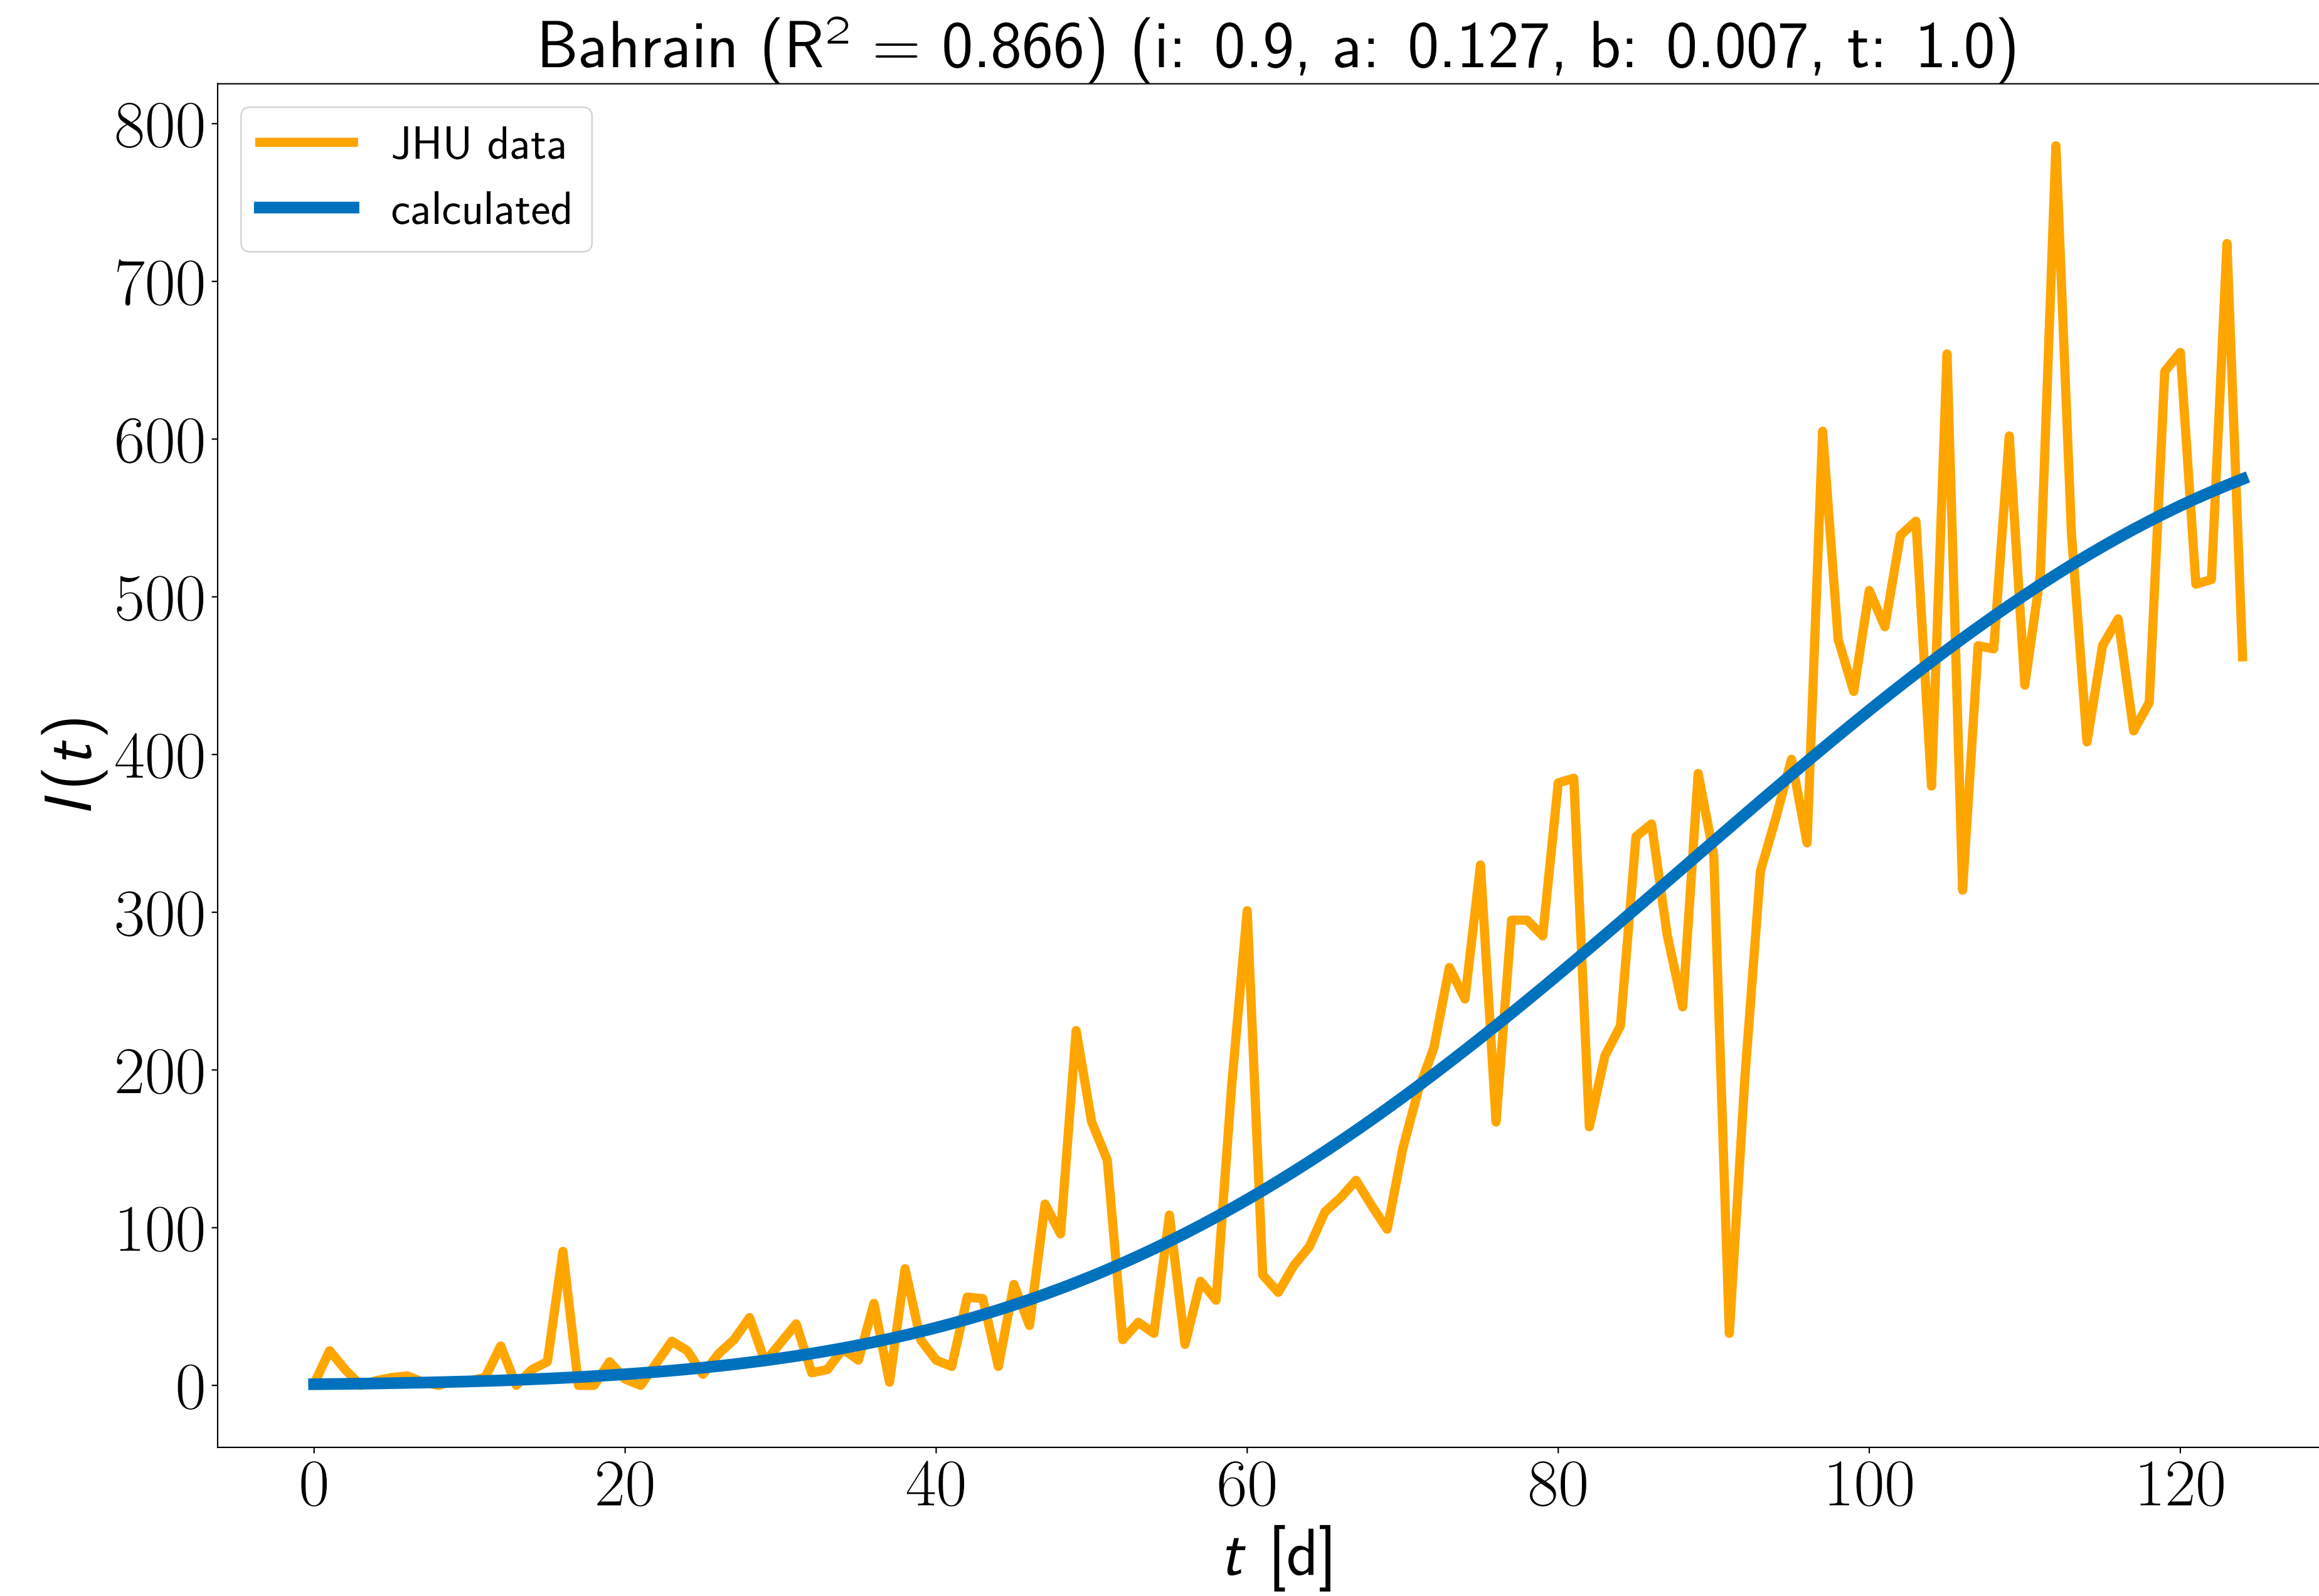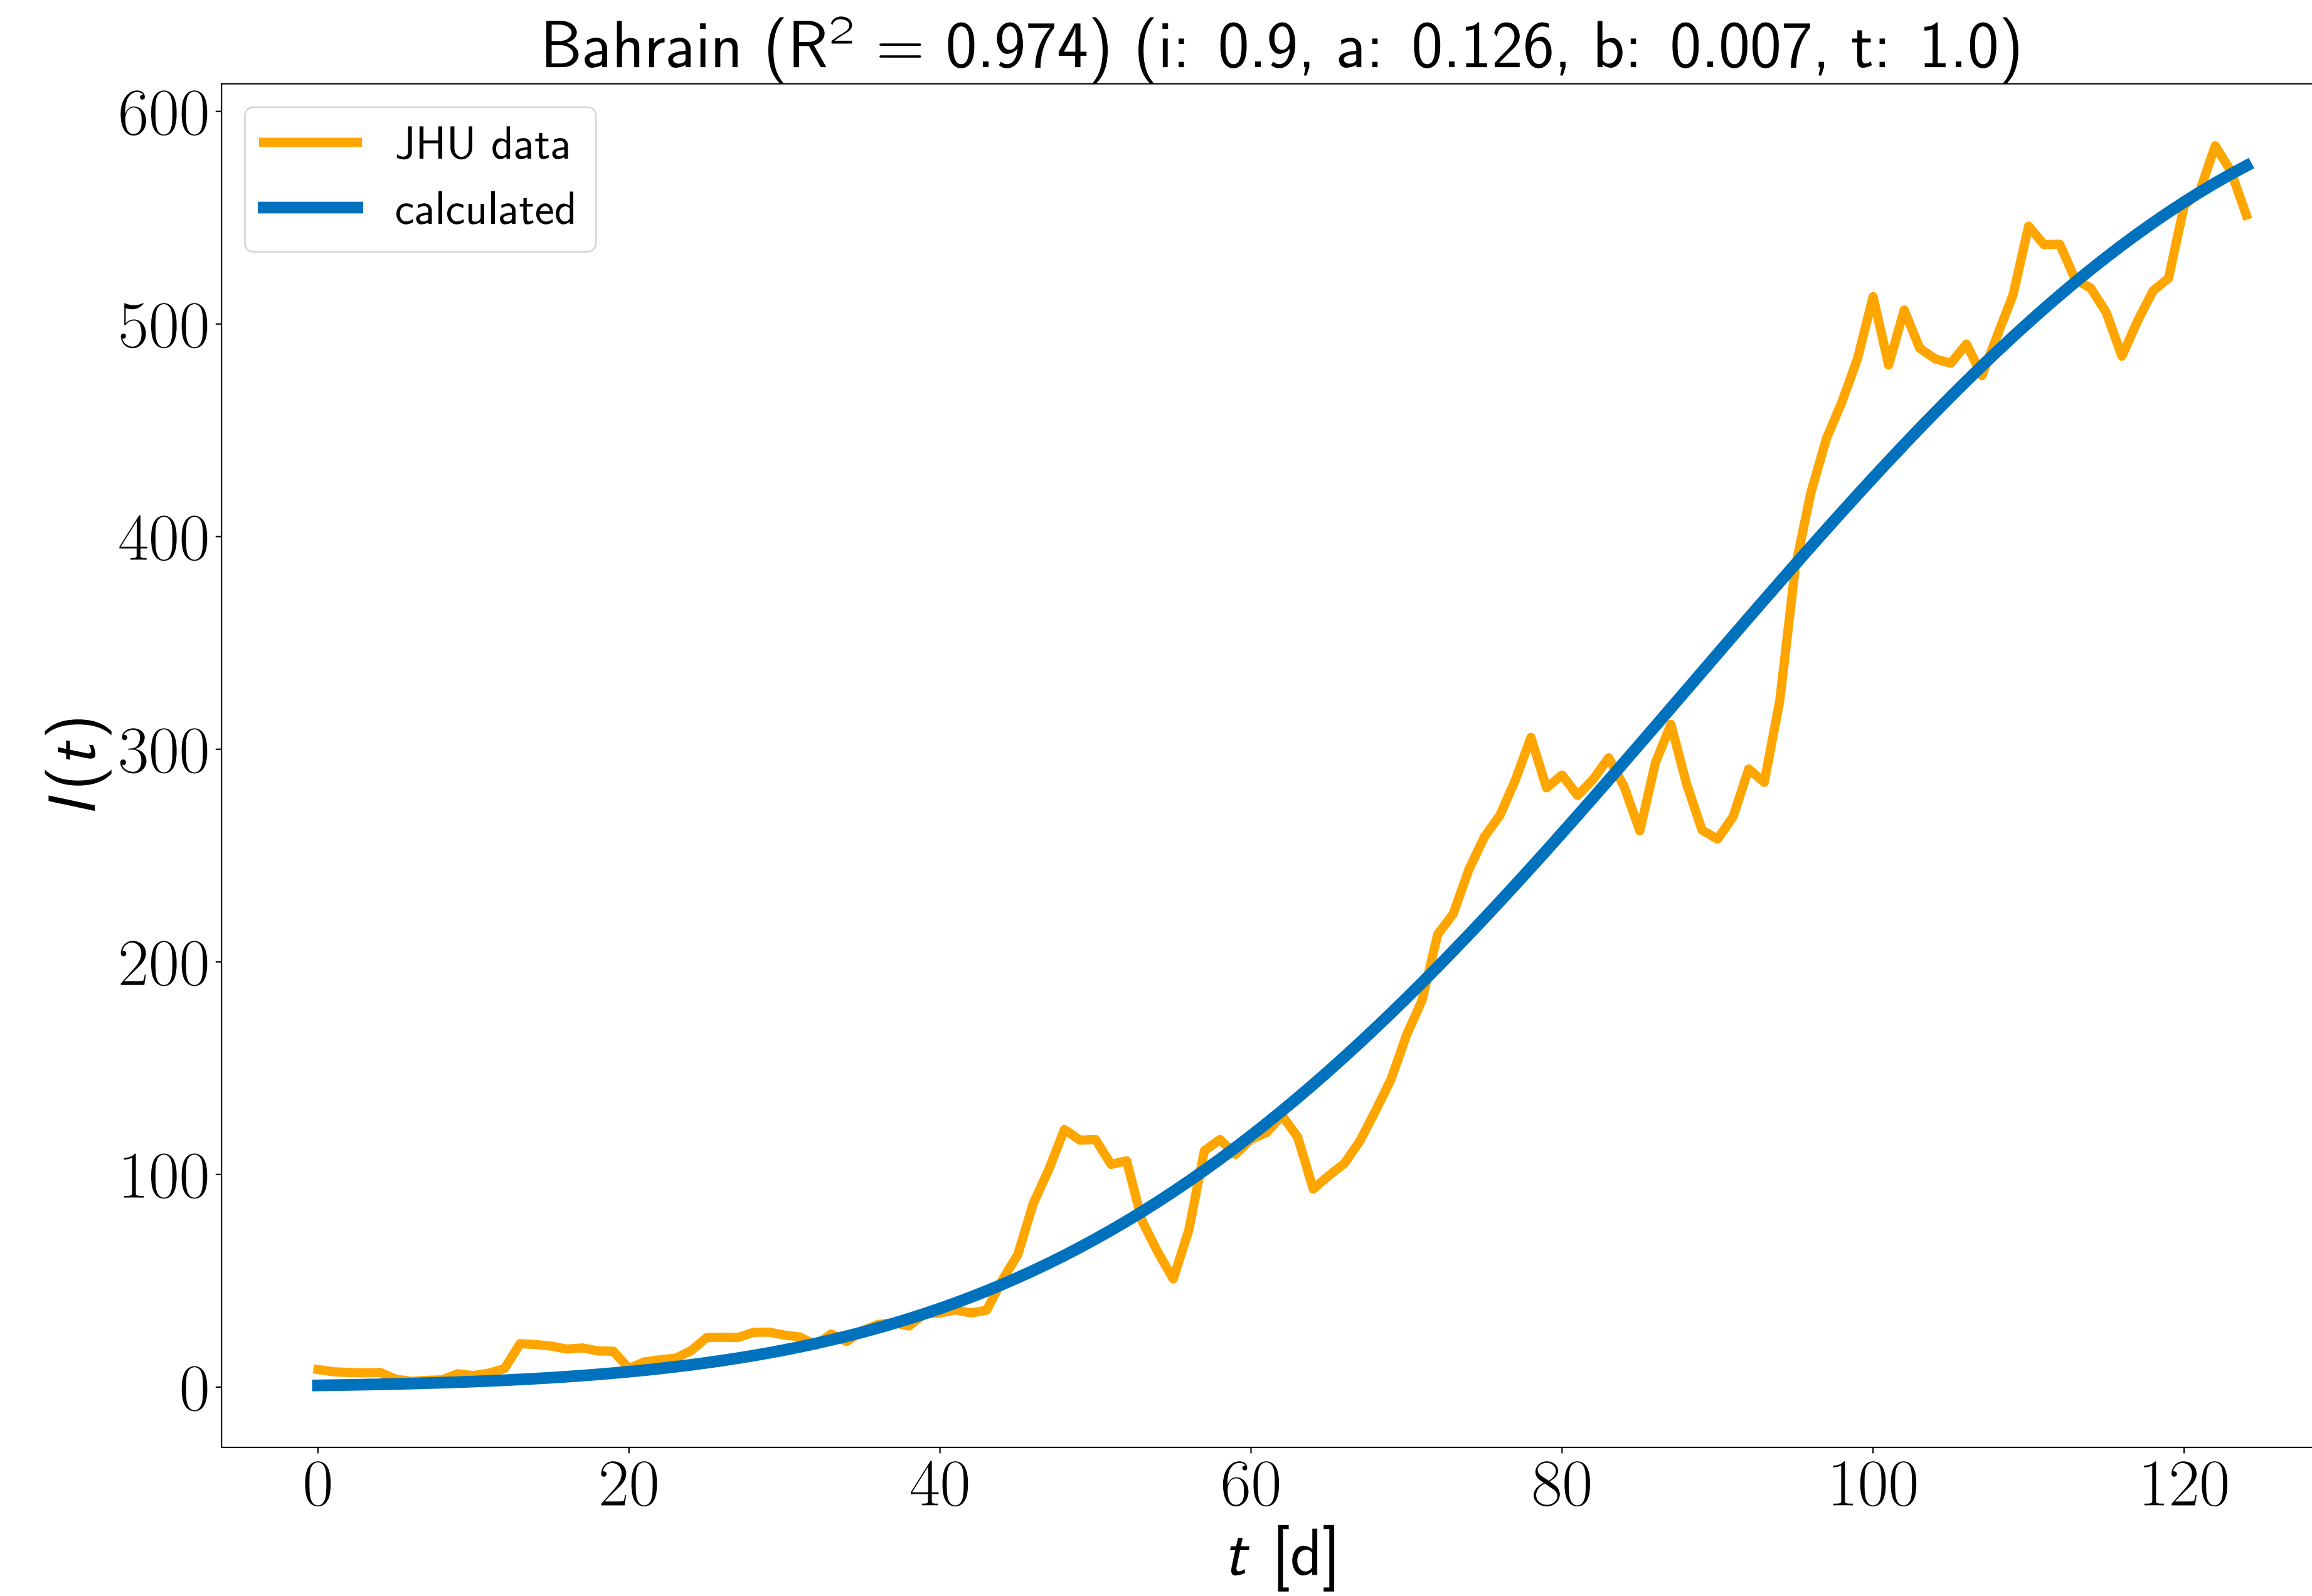

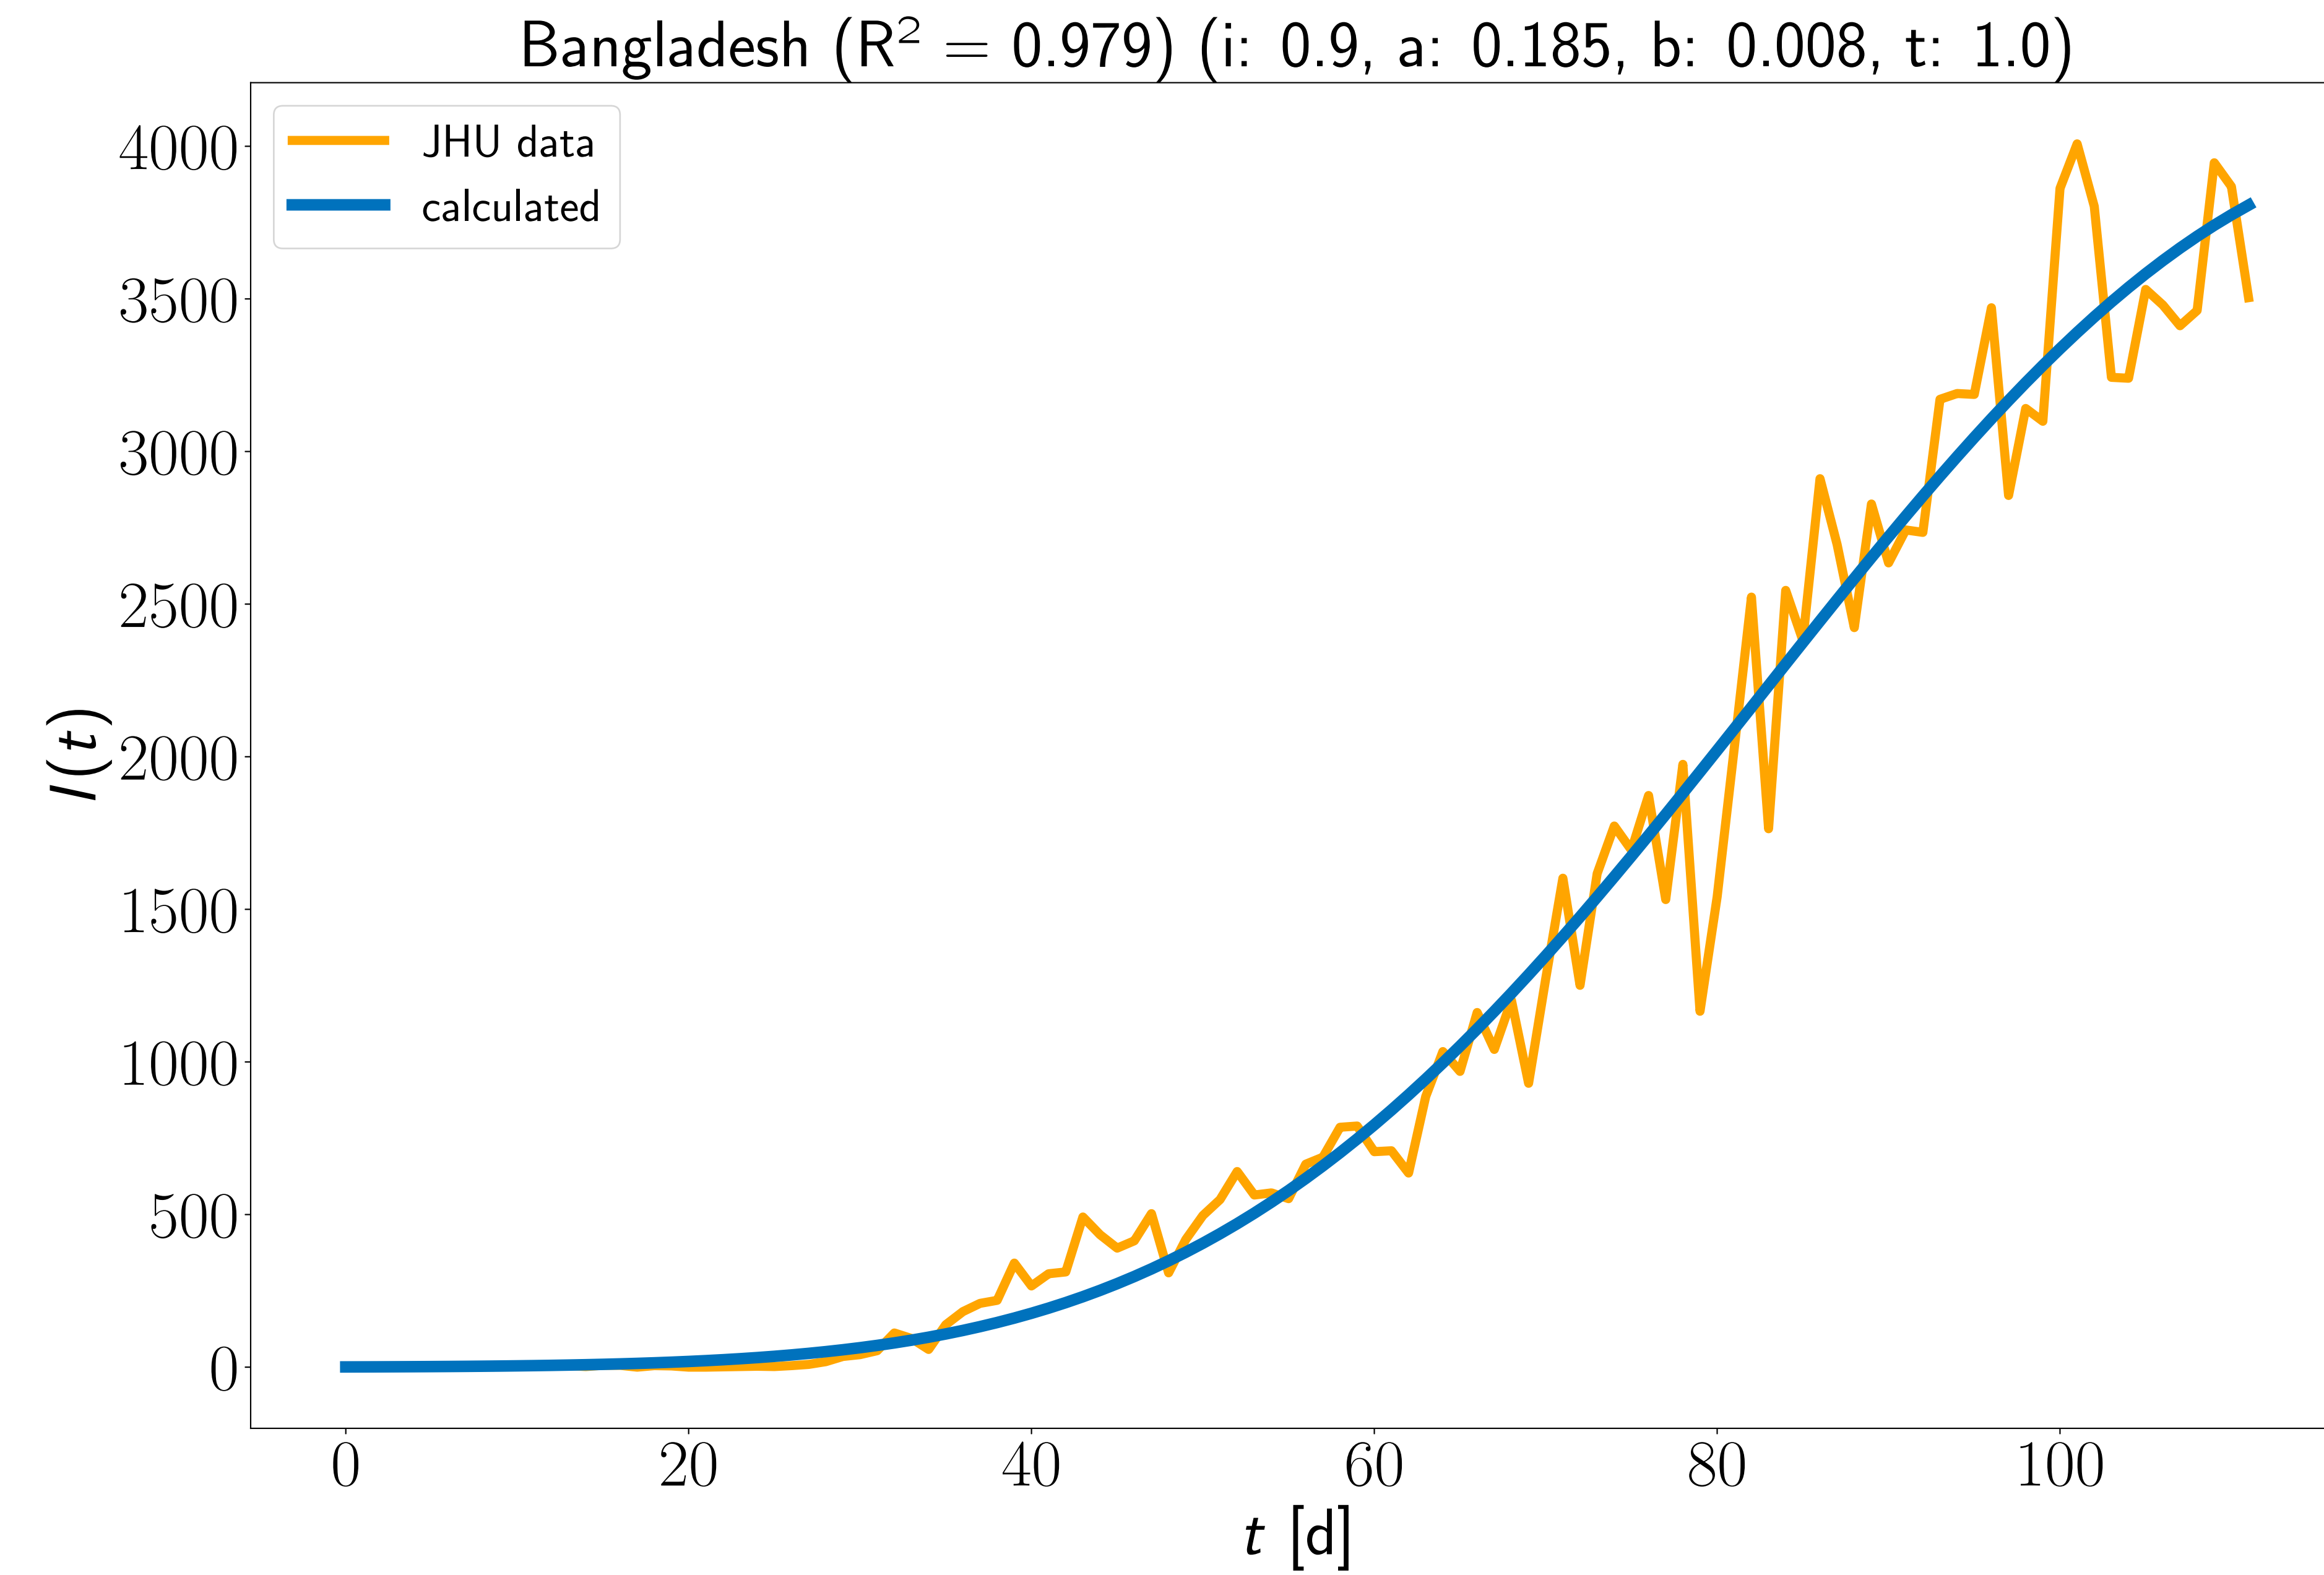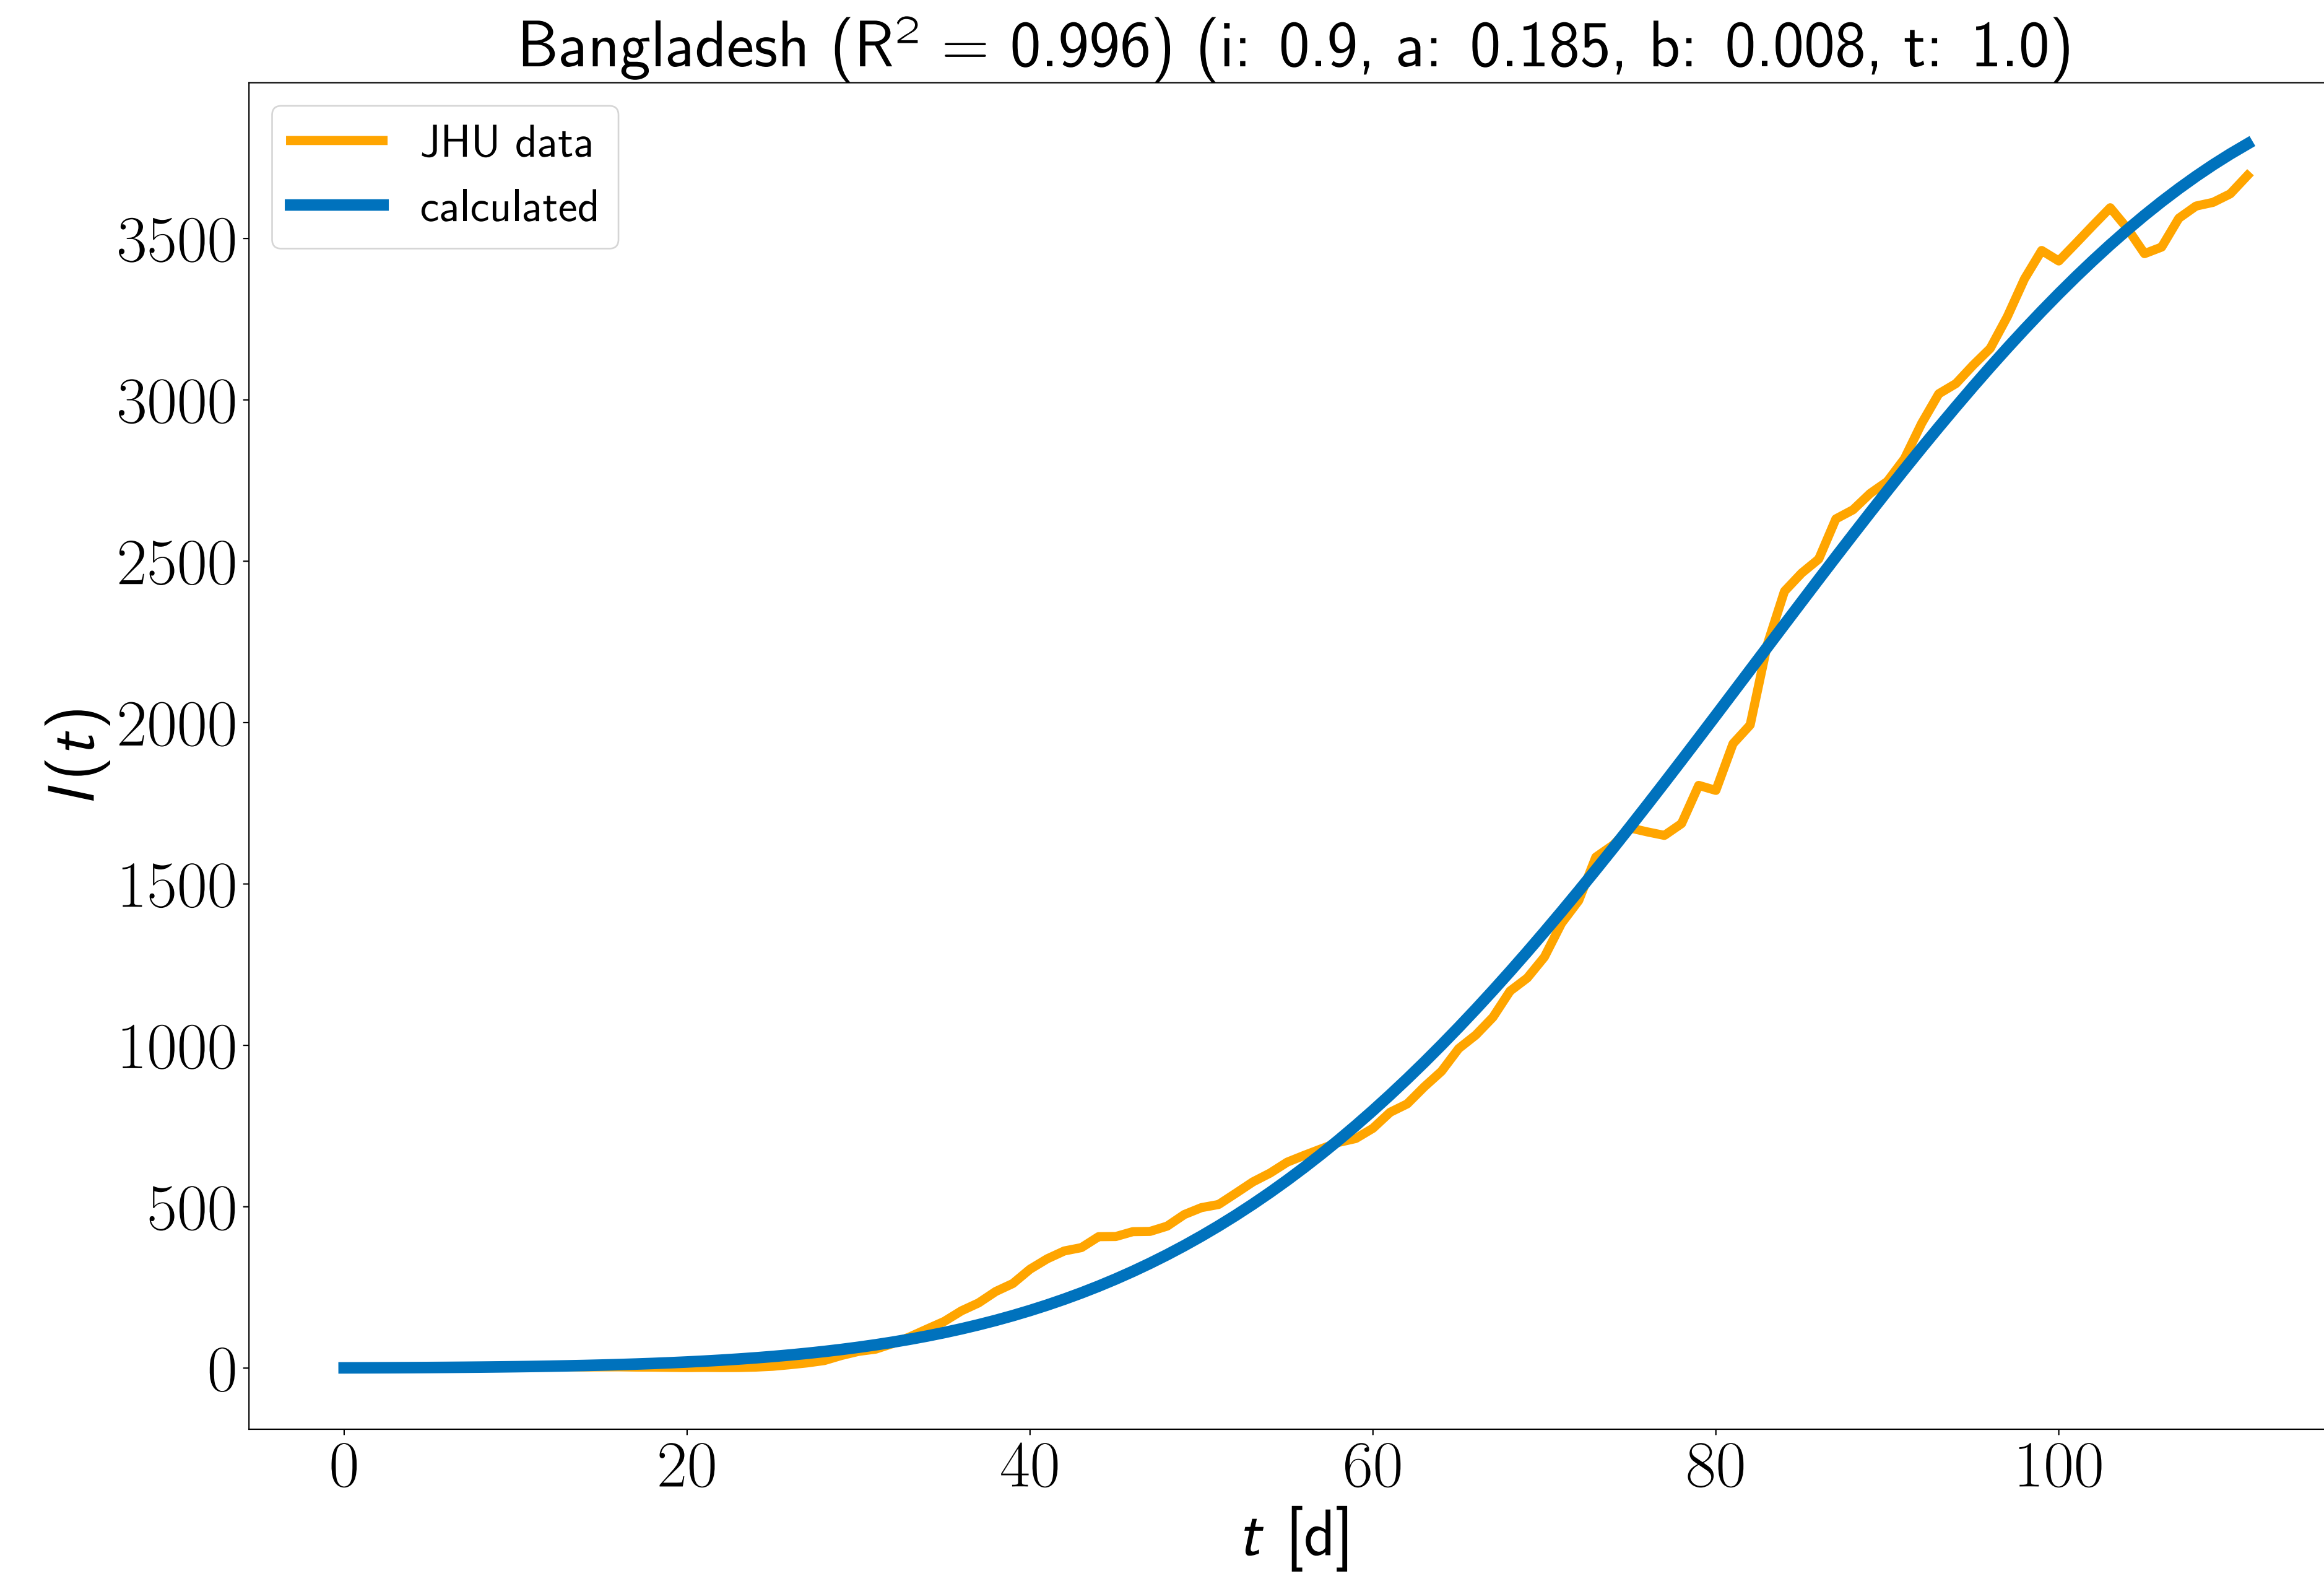

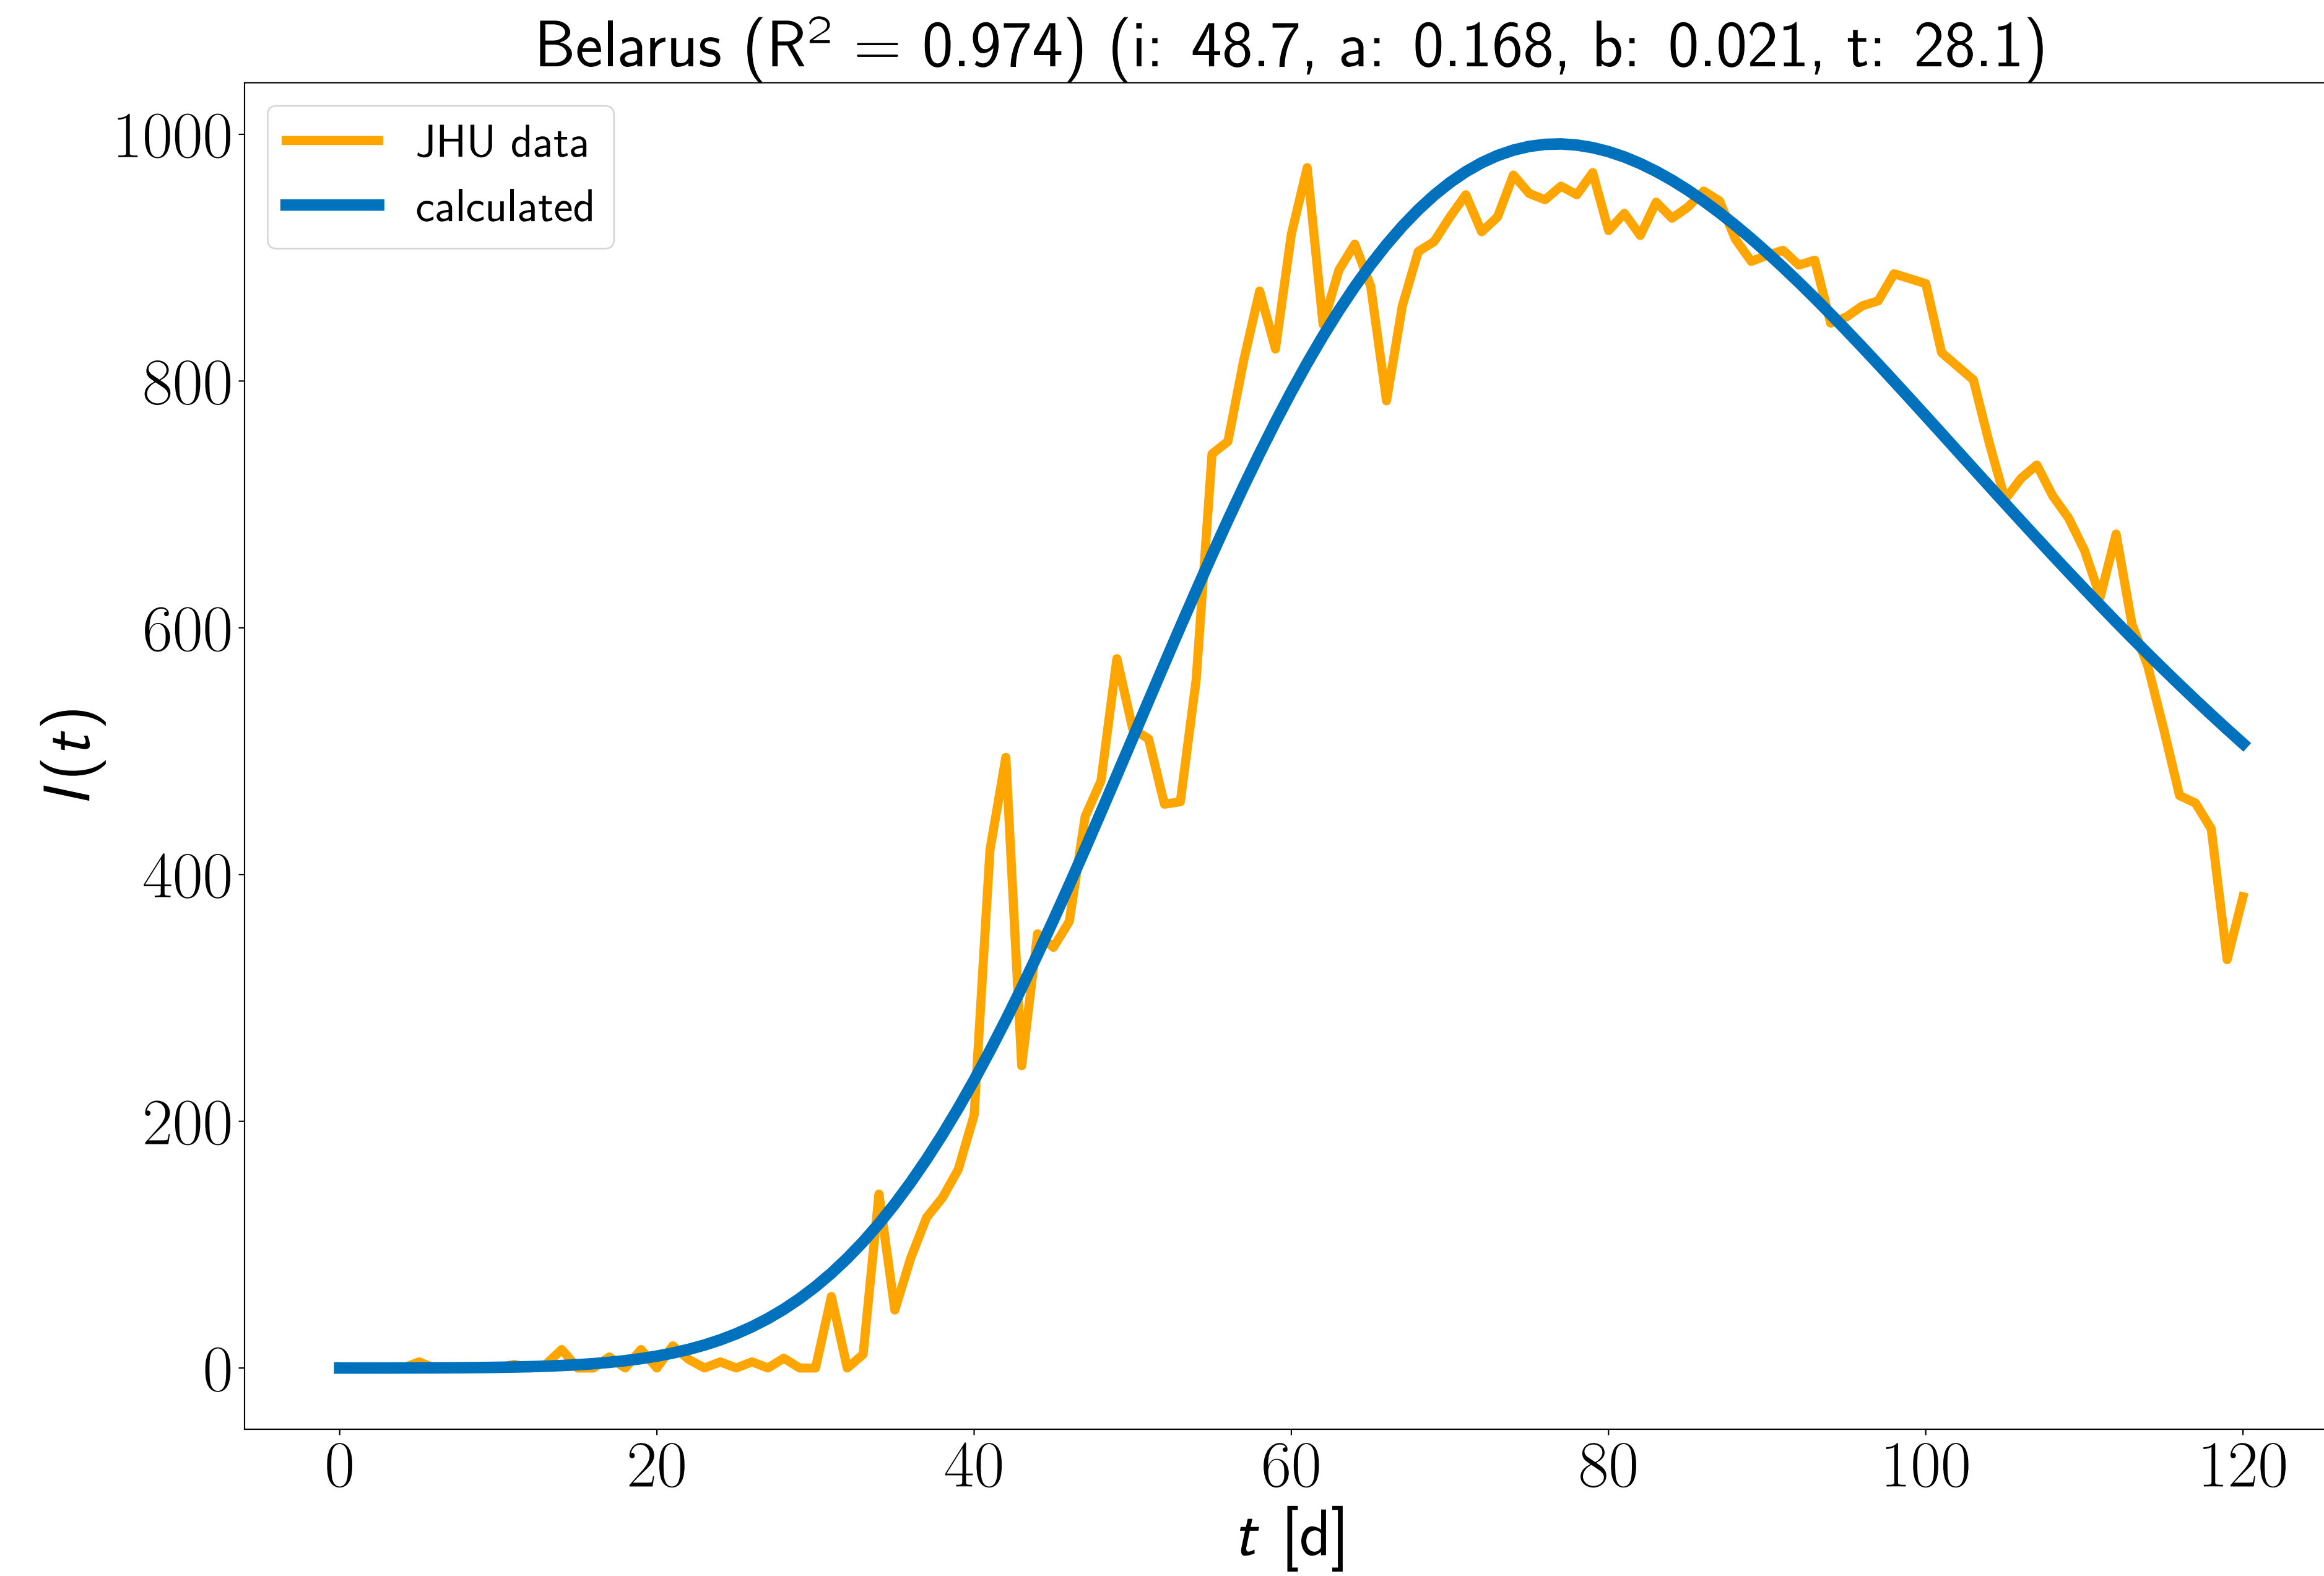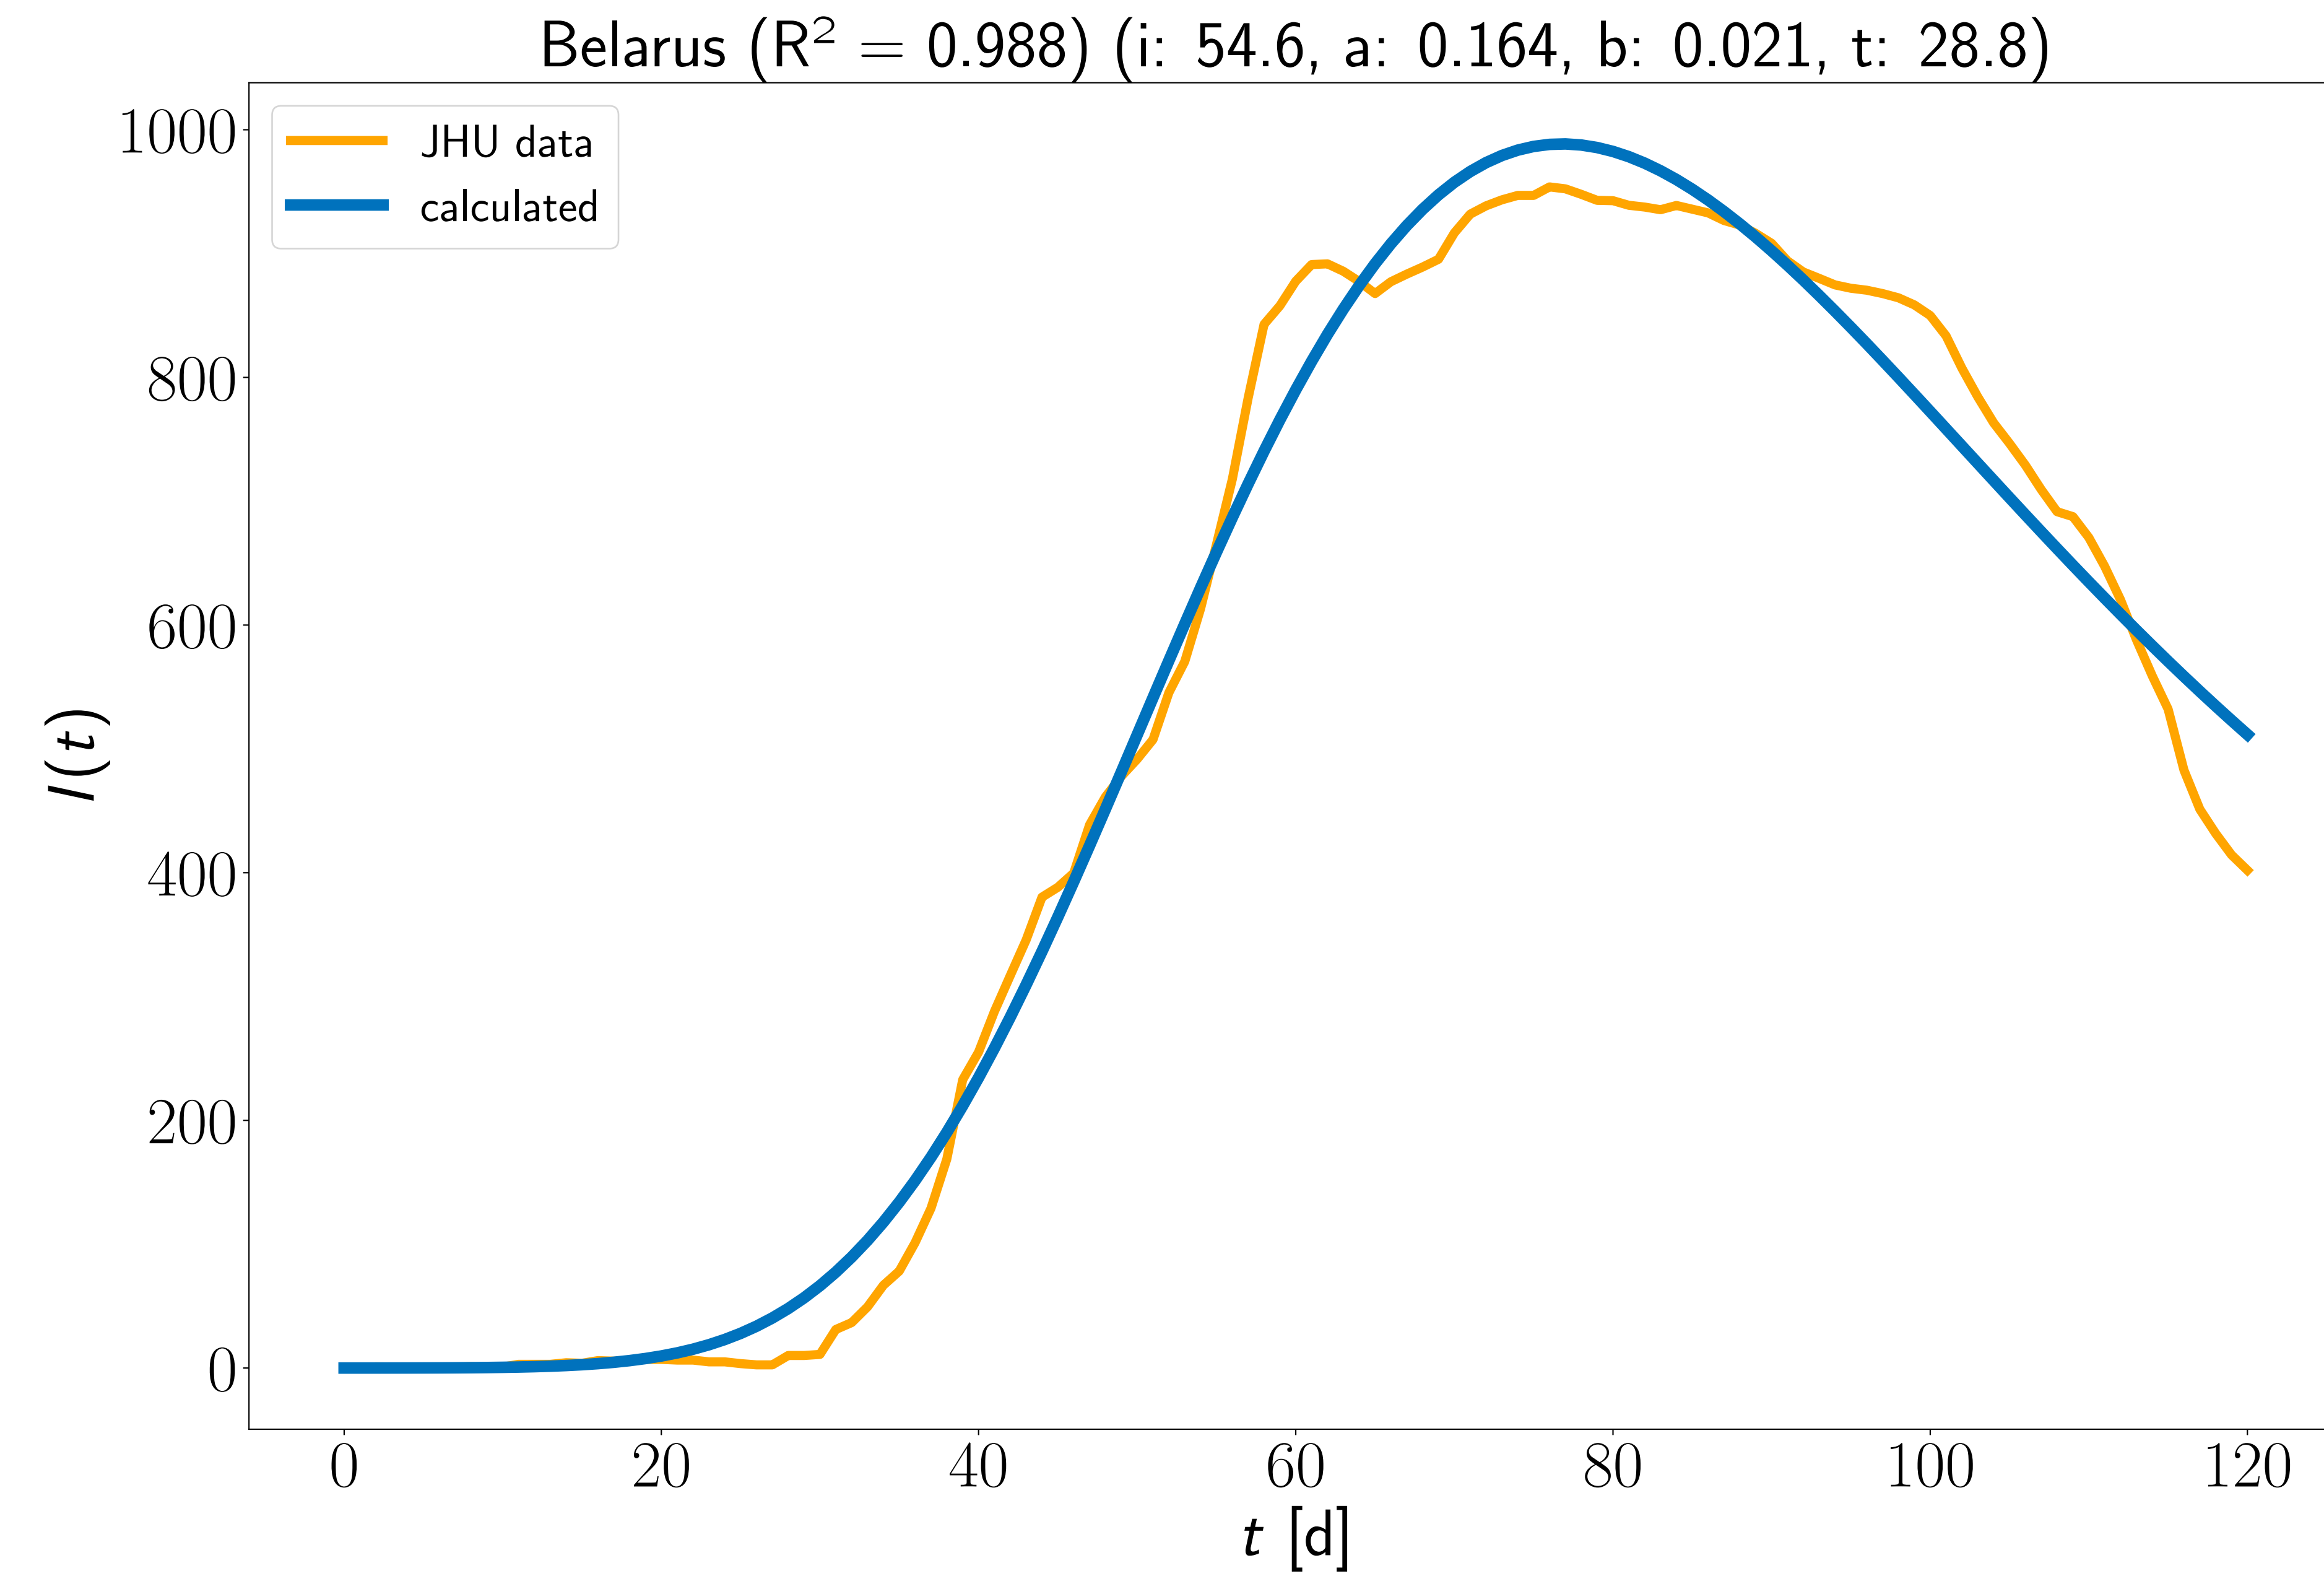

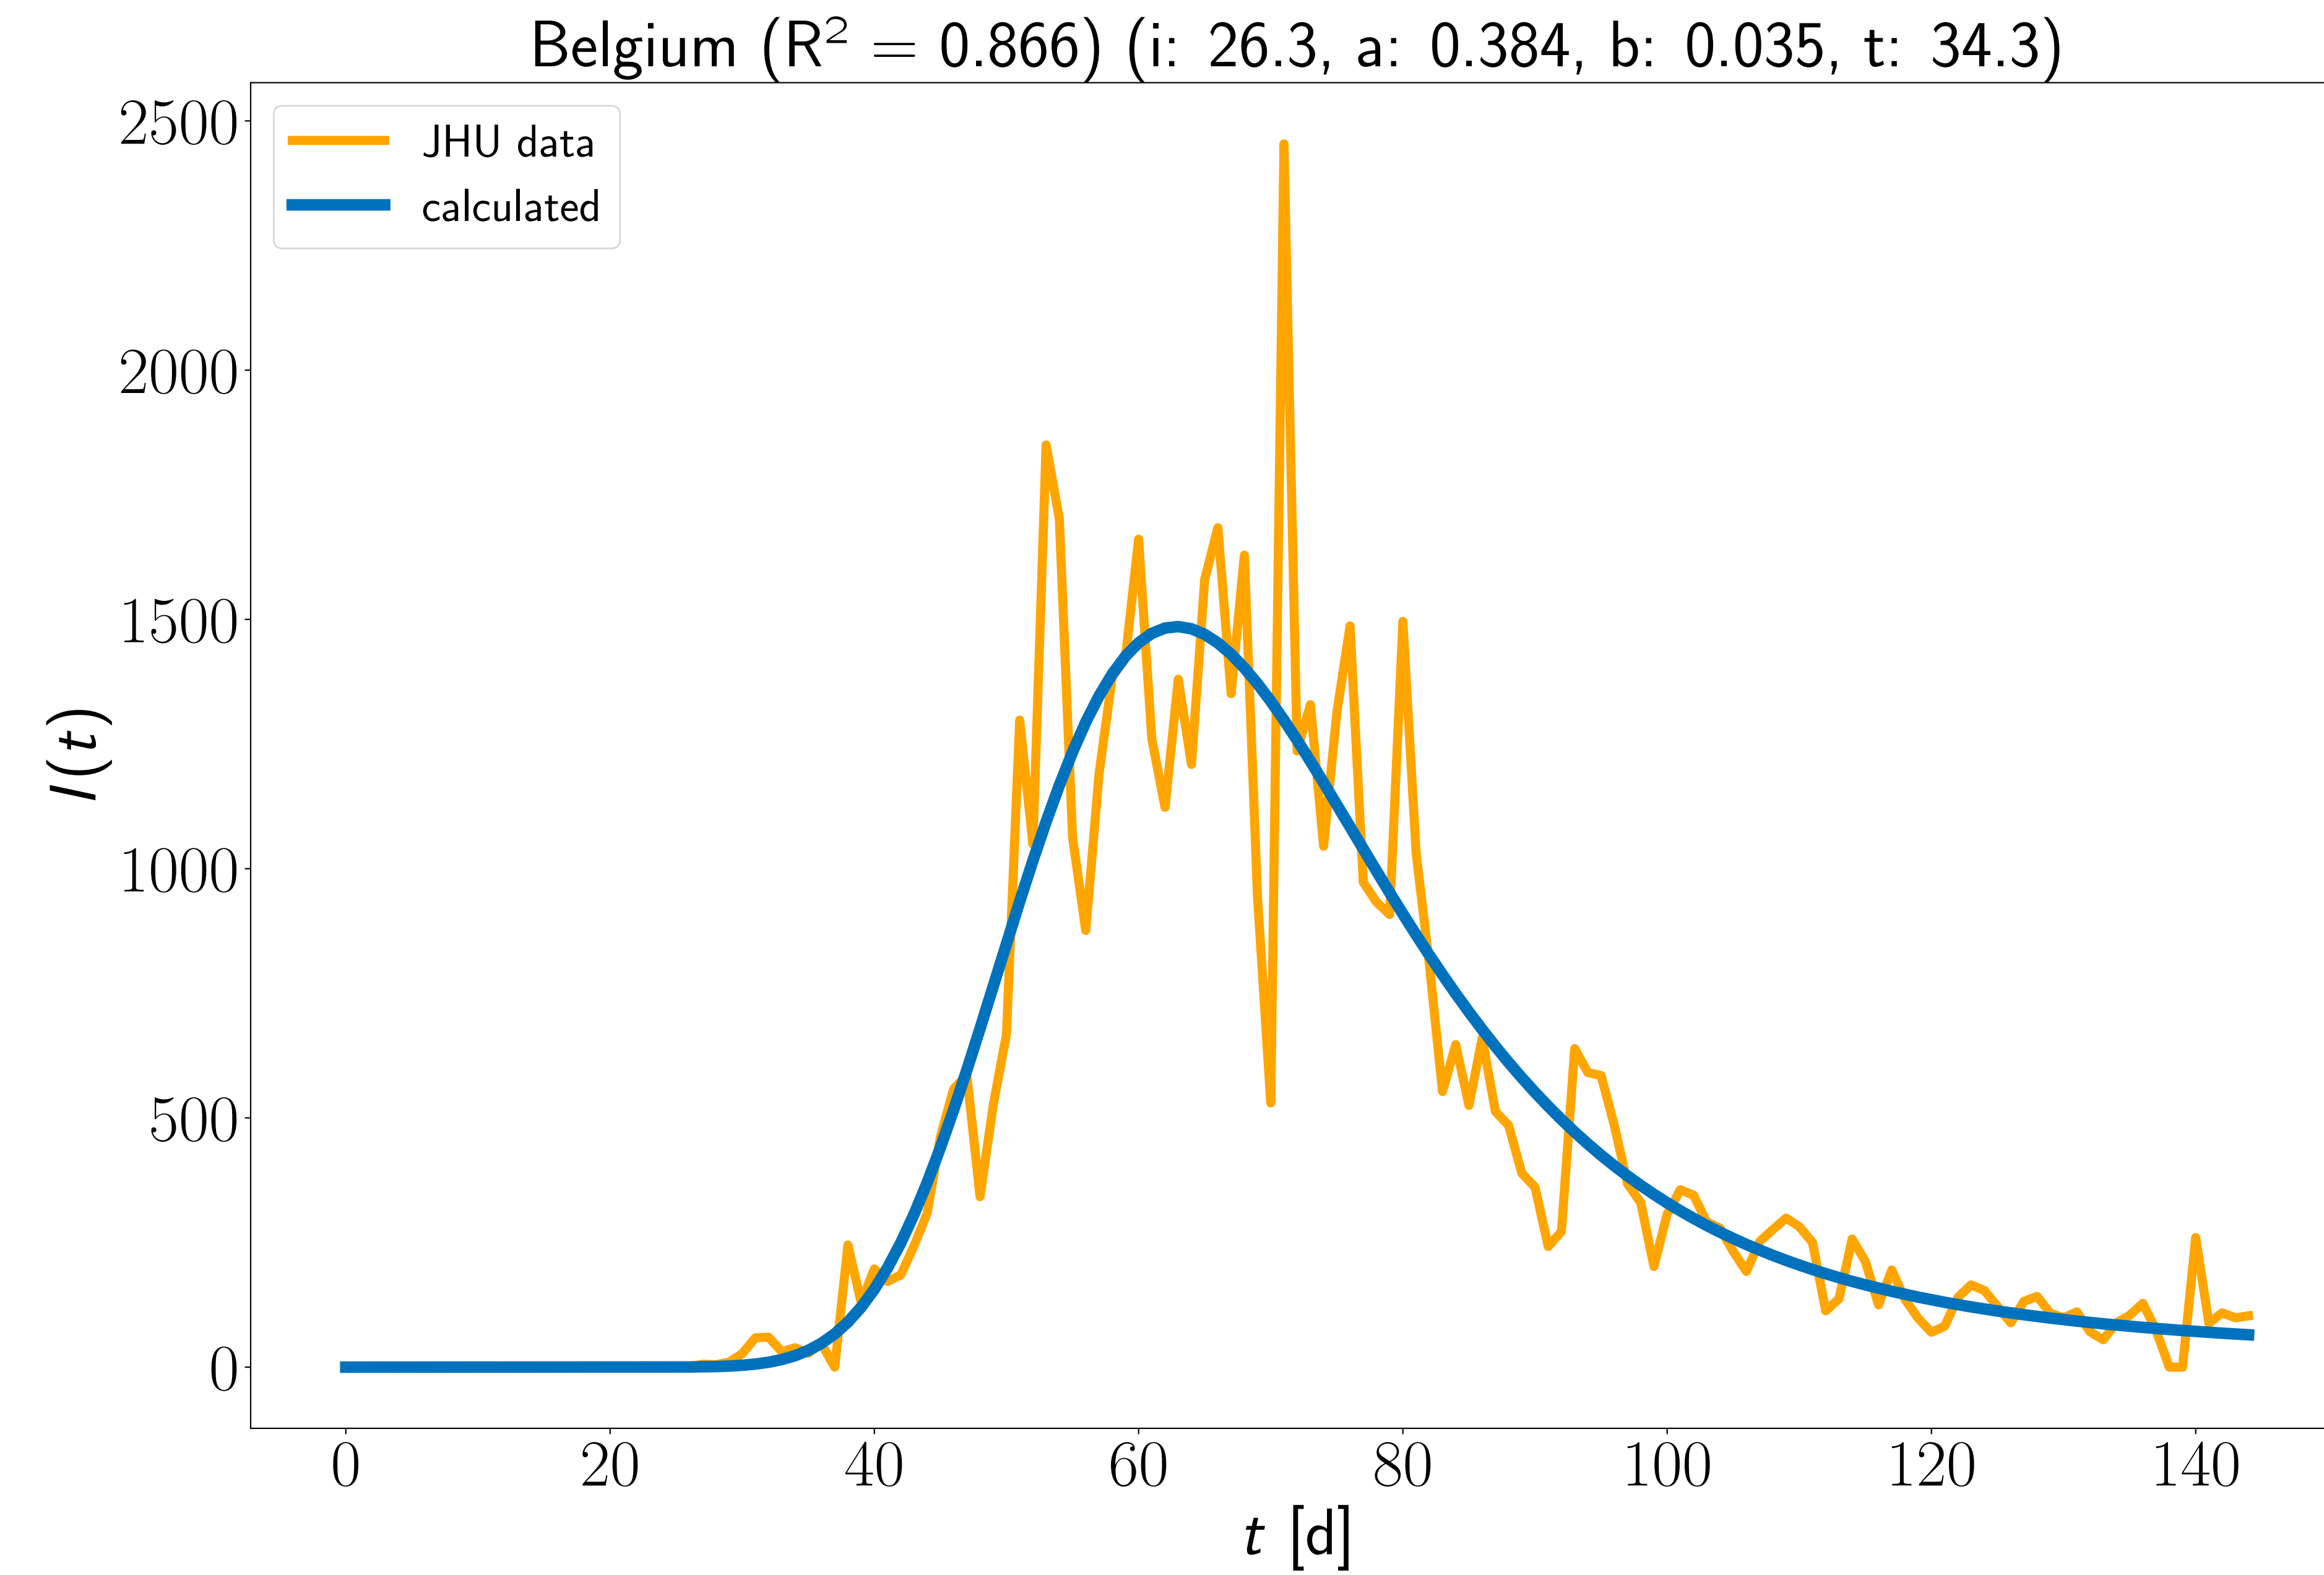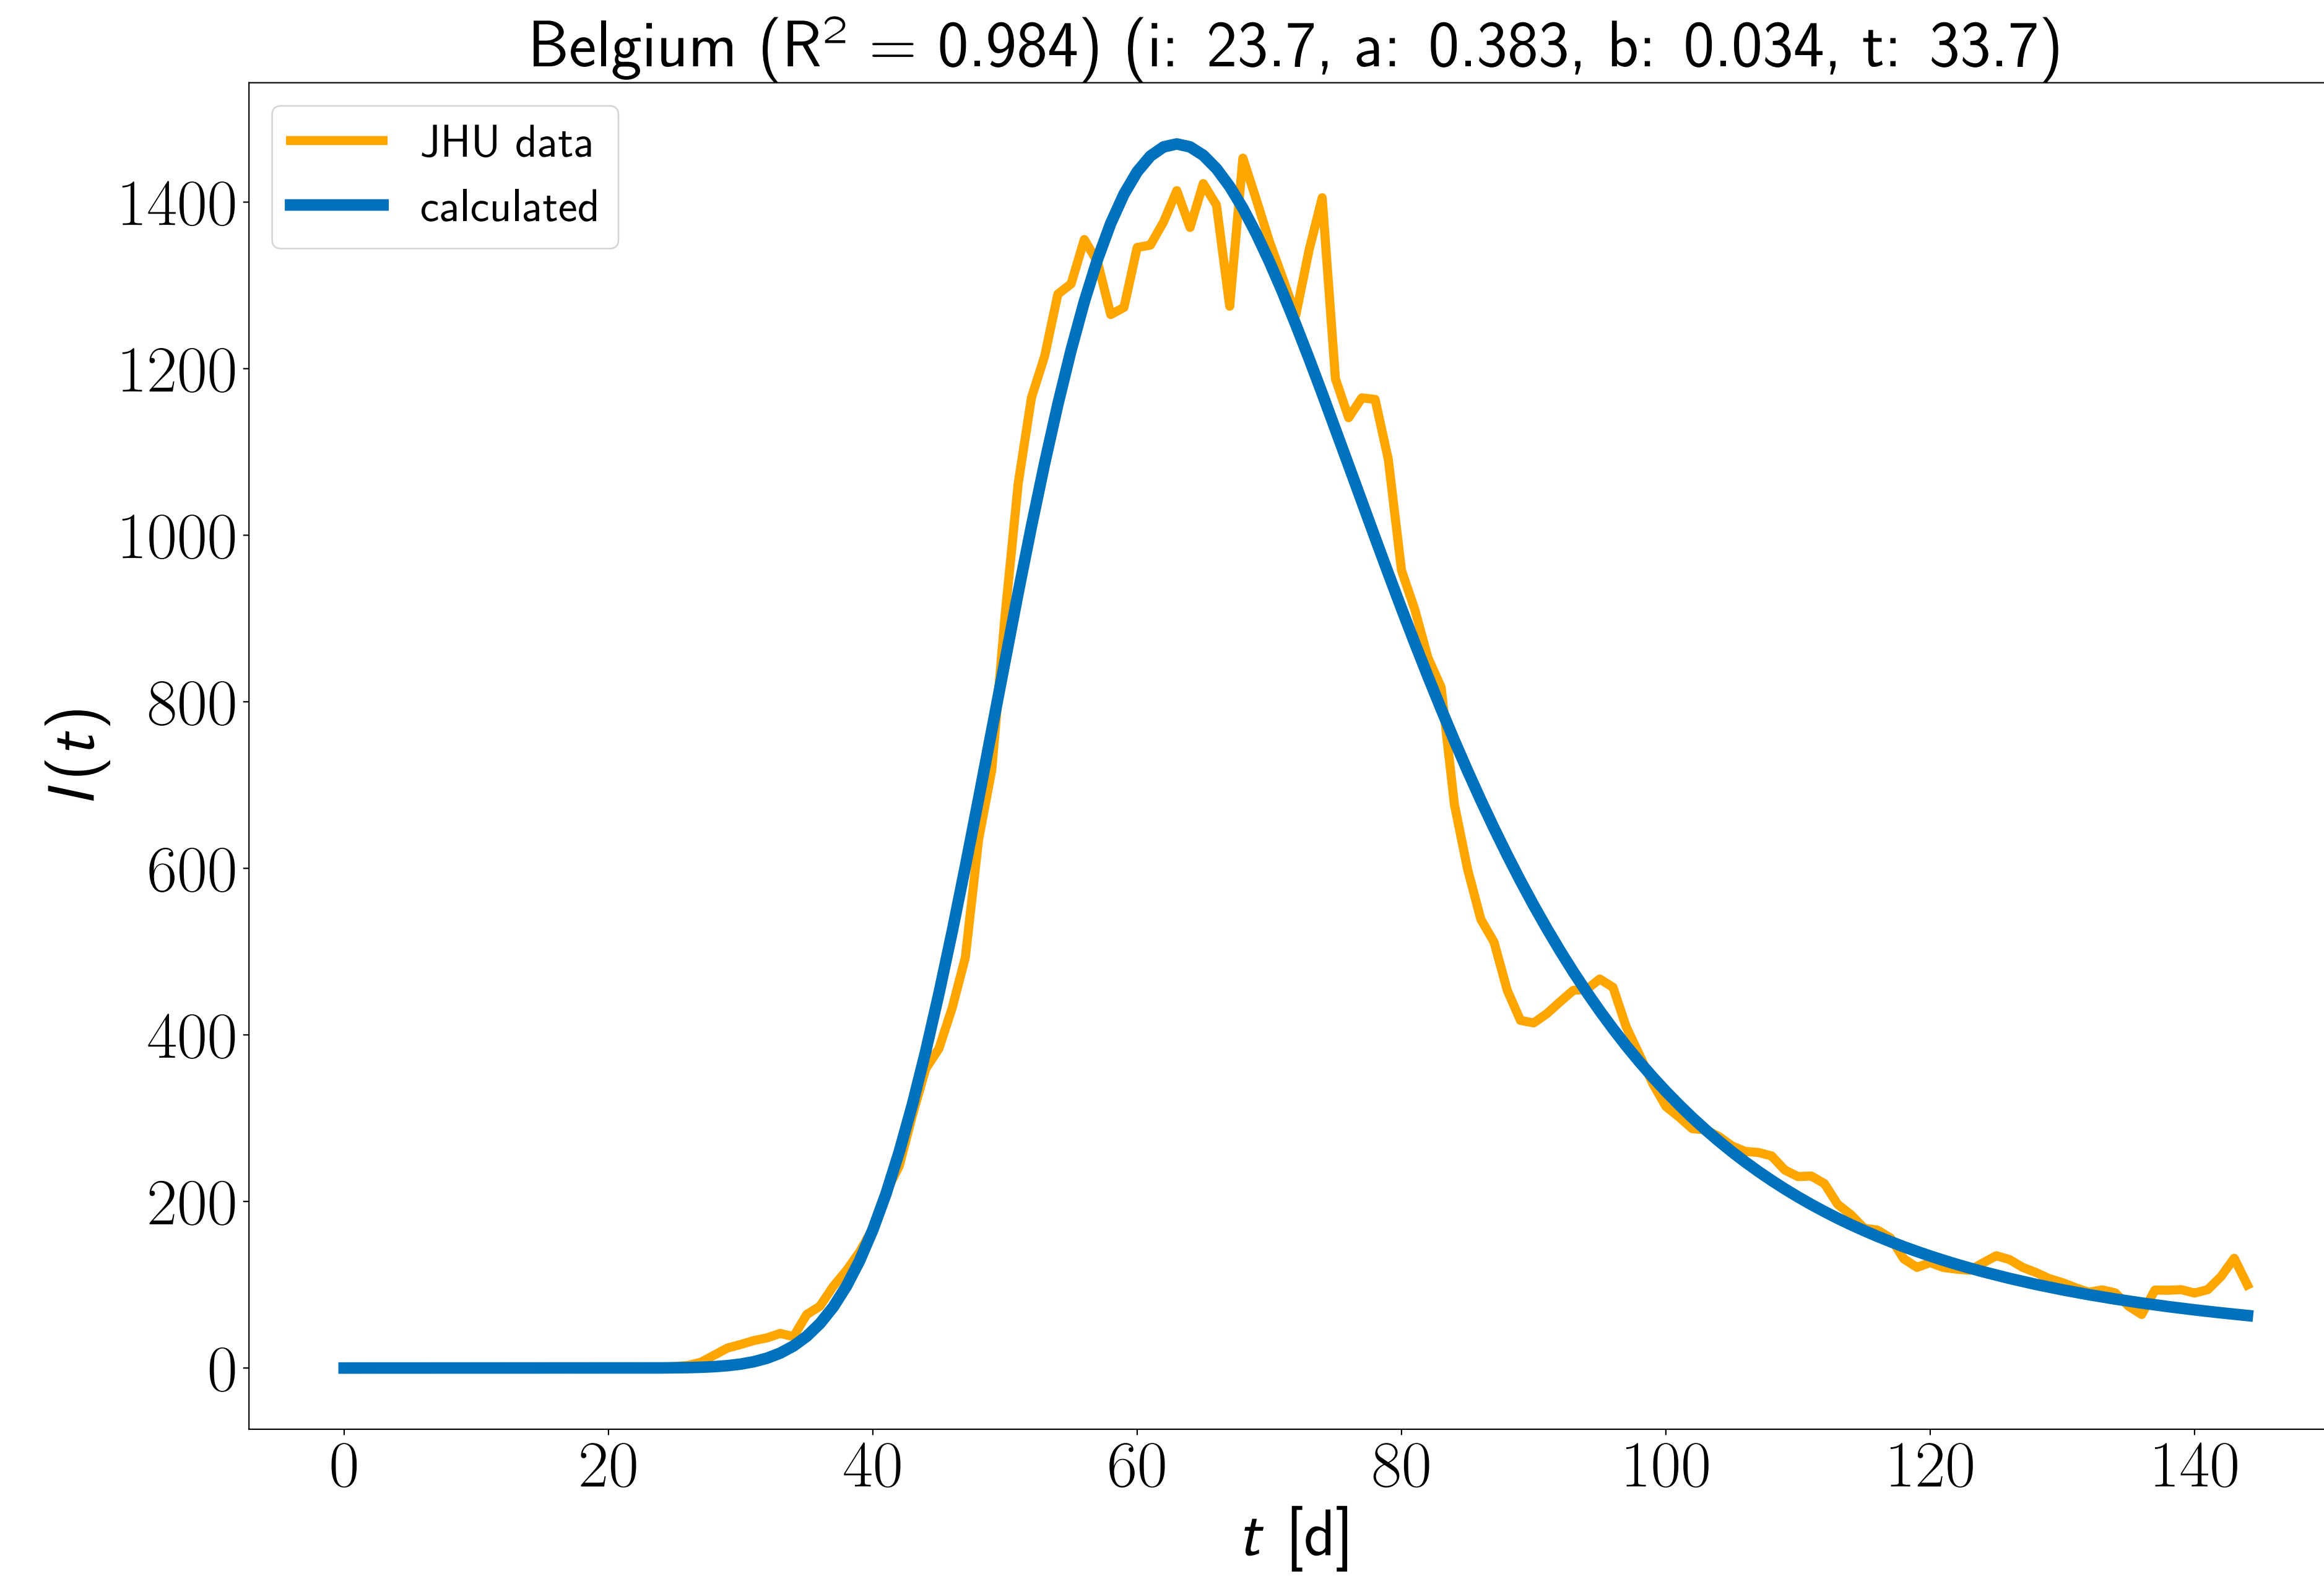

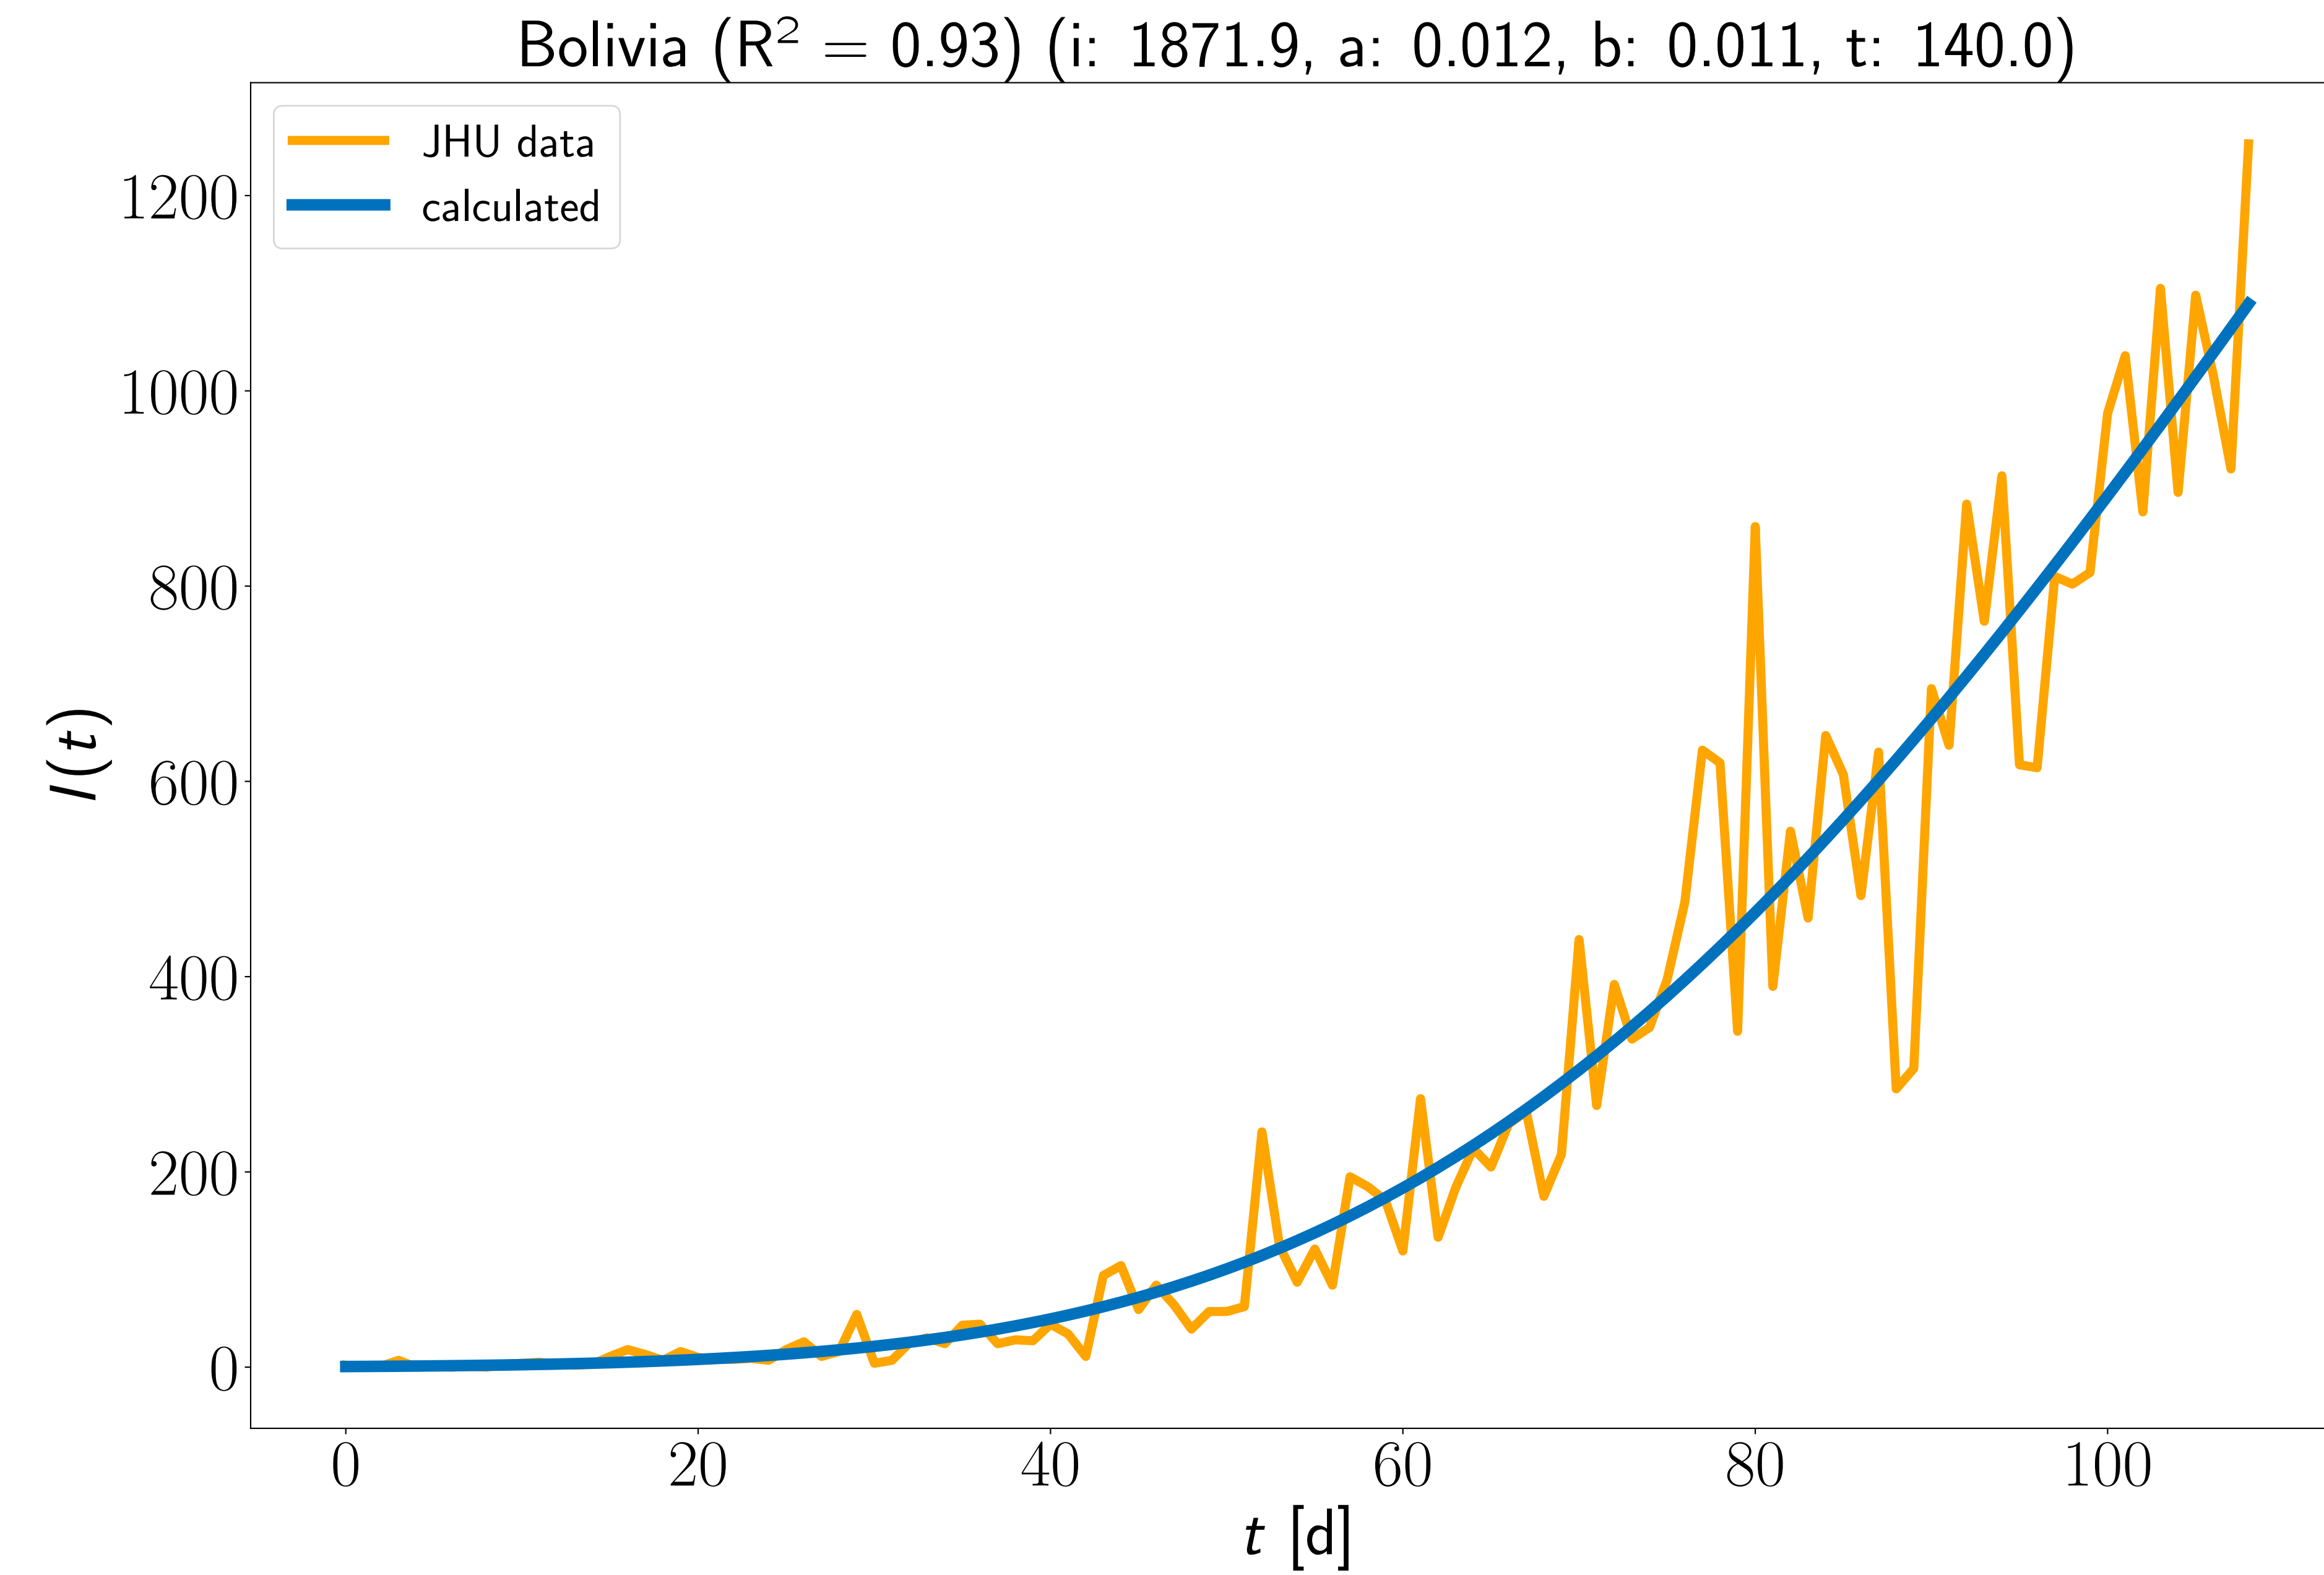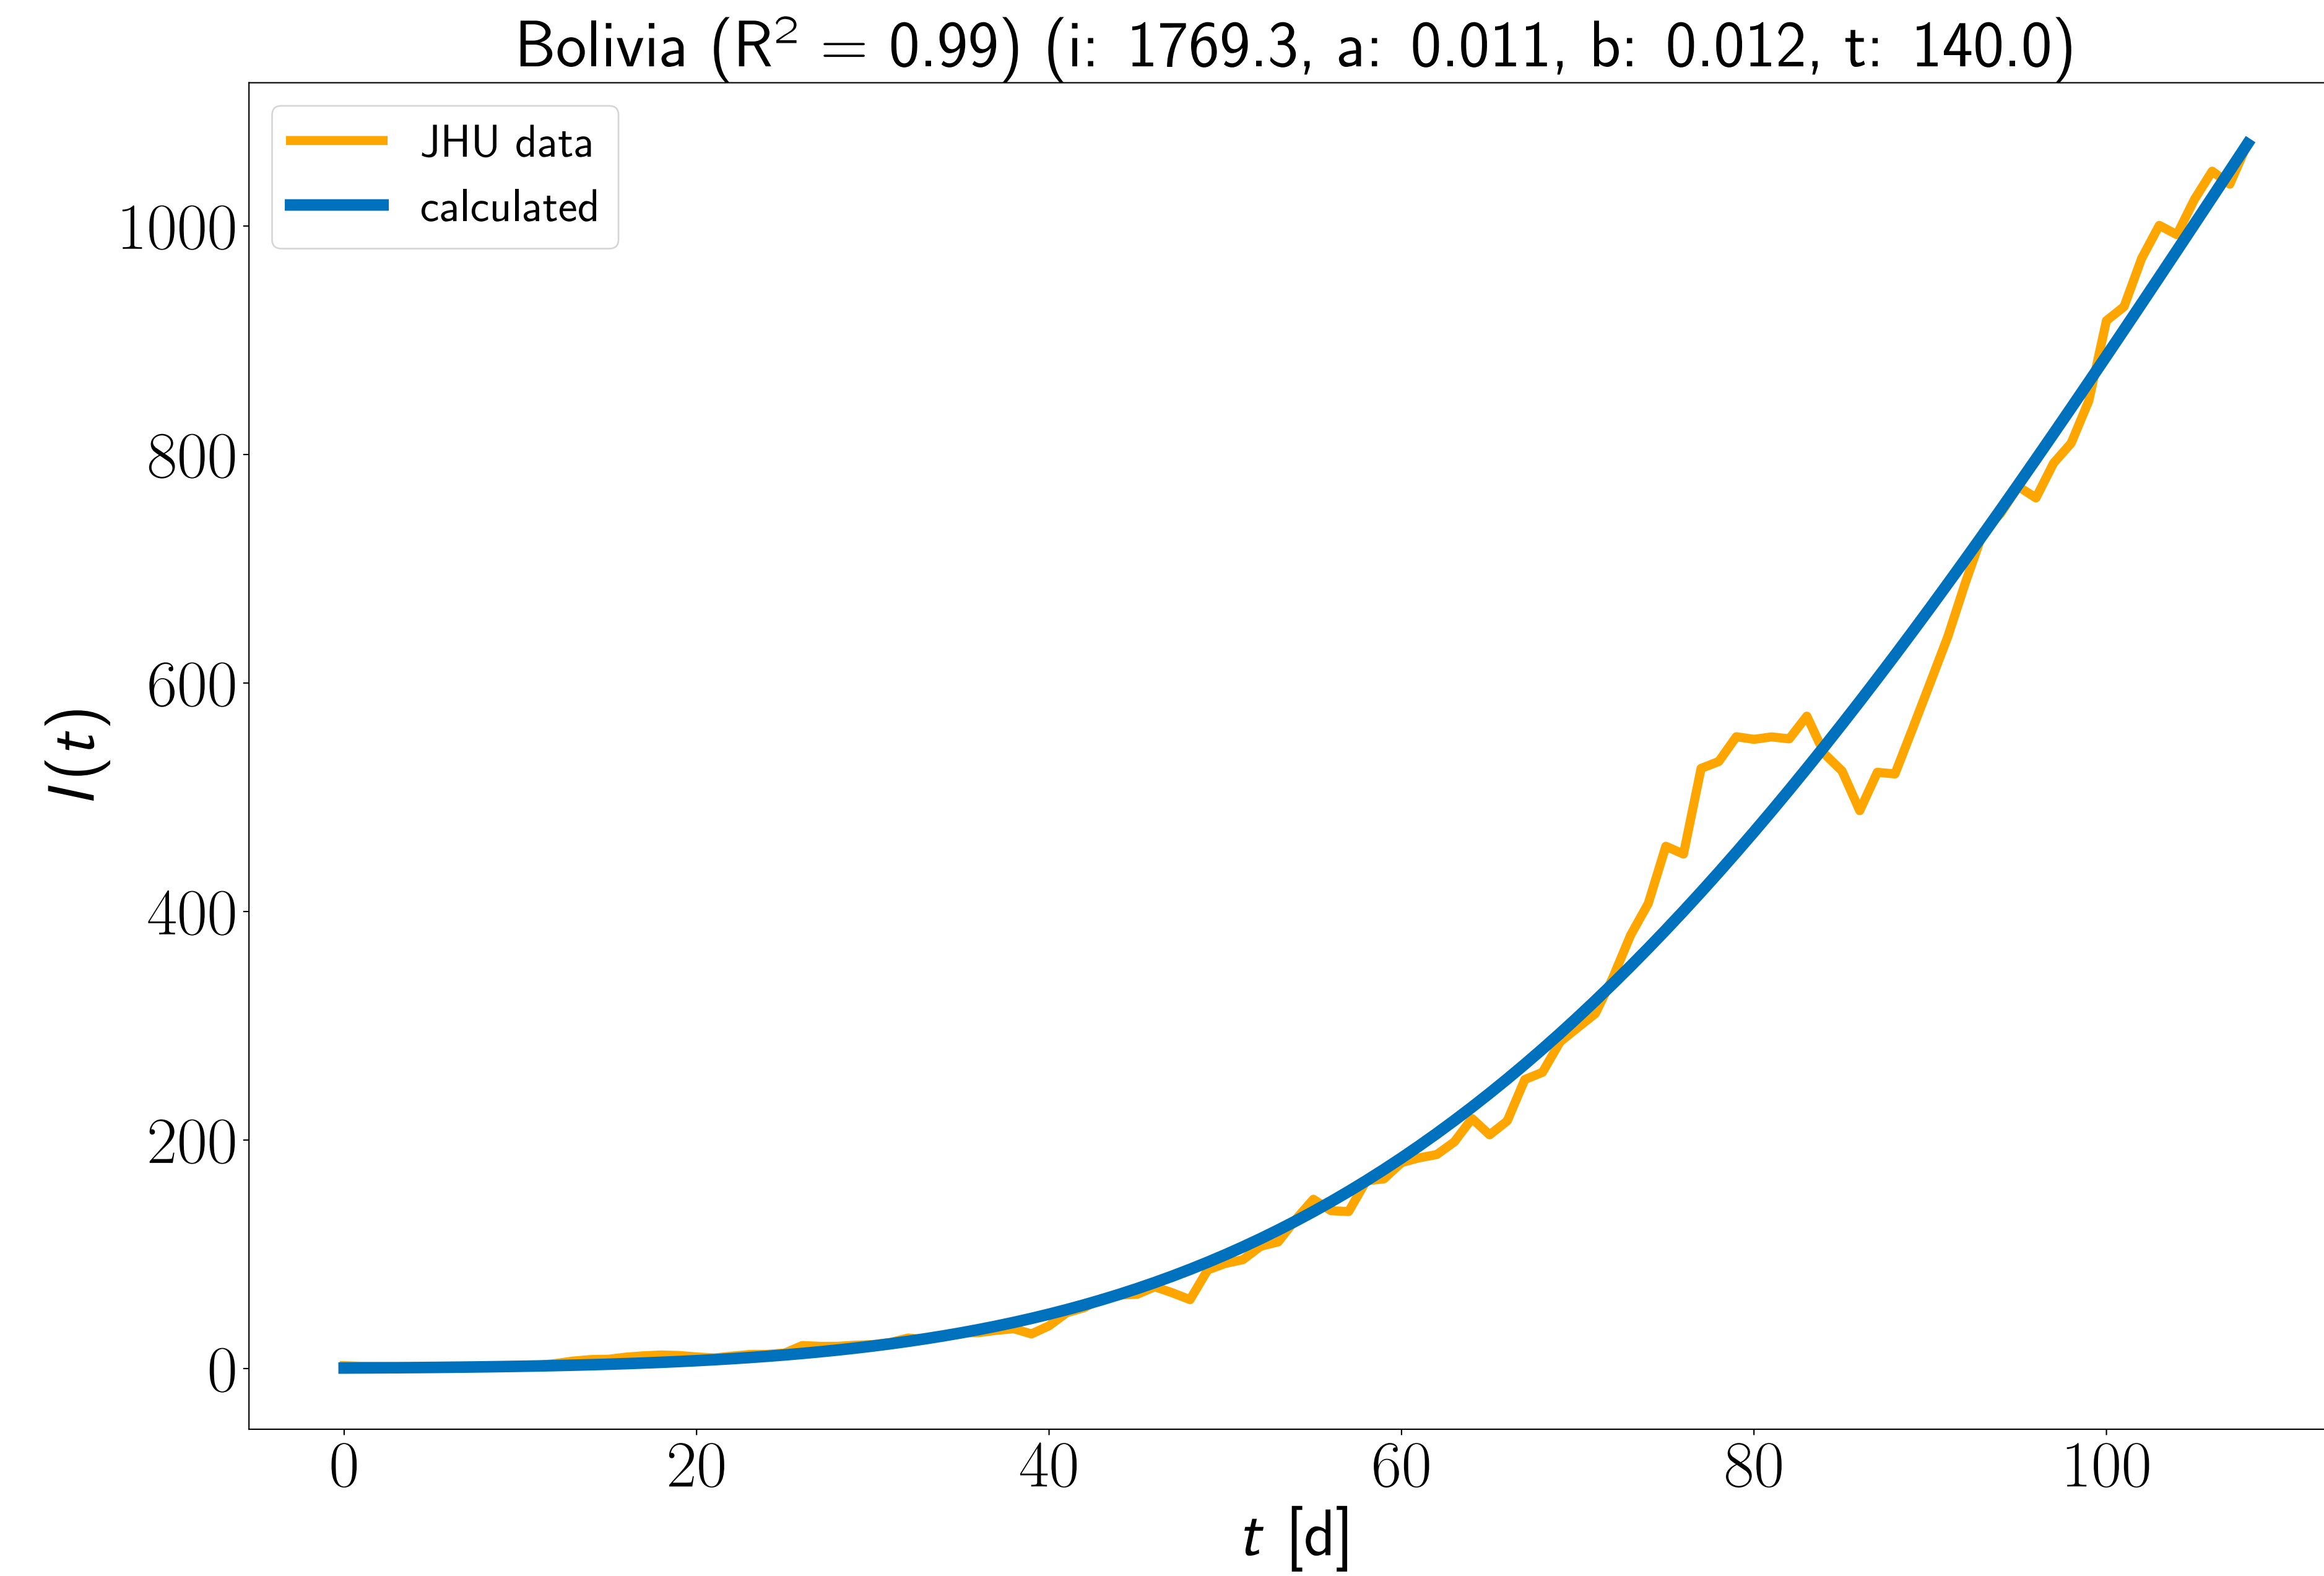

Brazil ( $R^2 = 0.872$ ) (i: 3000.0, a: 0.068, b: 0.009, t: 52.3)

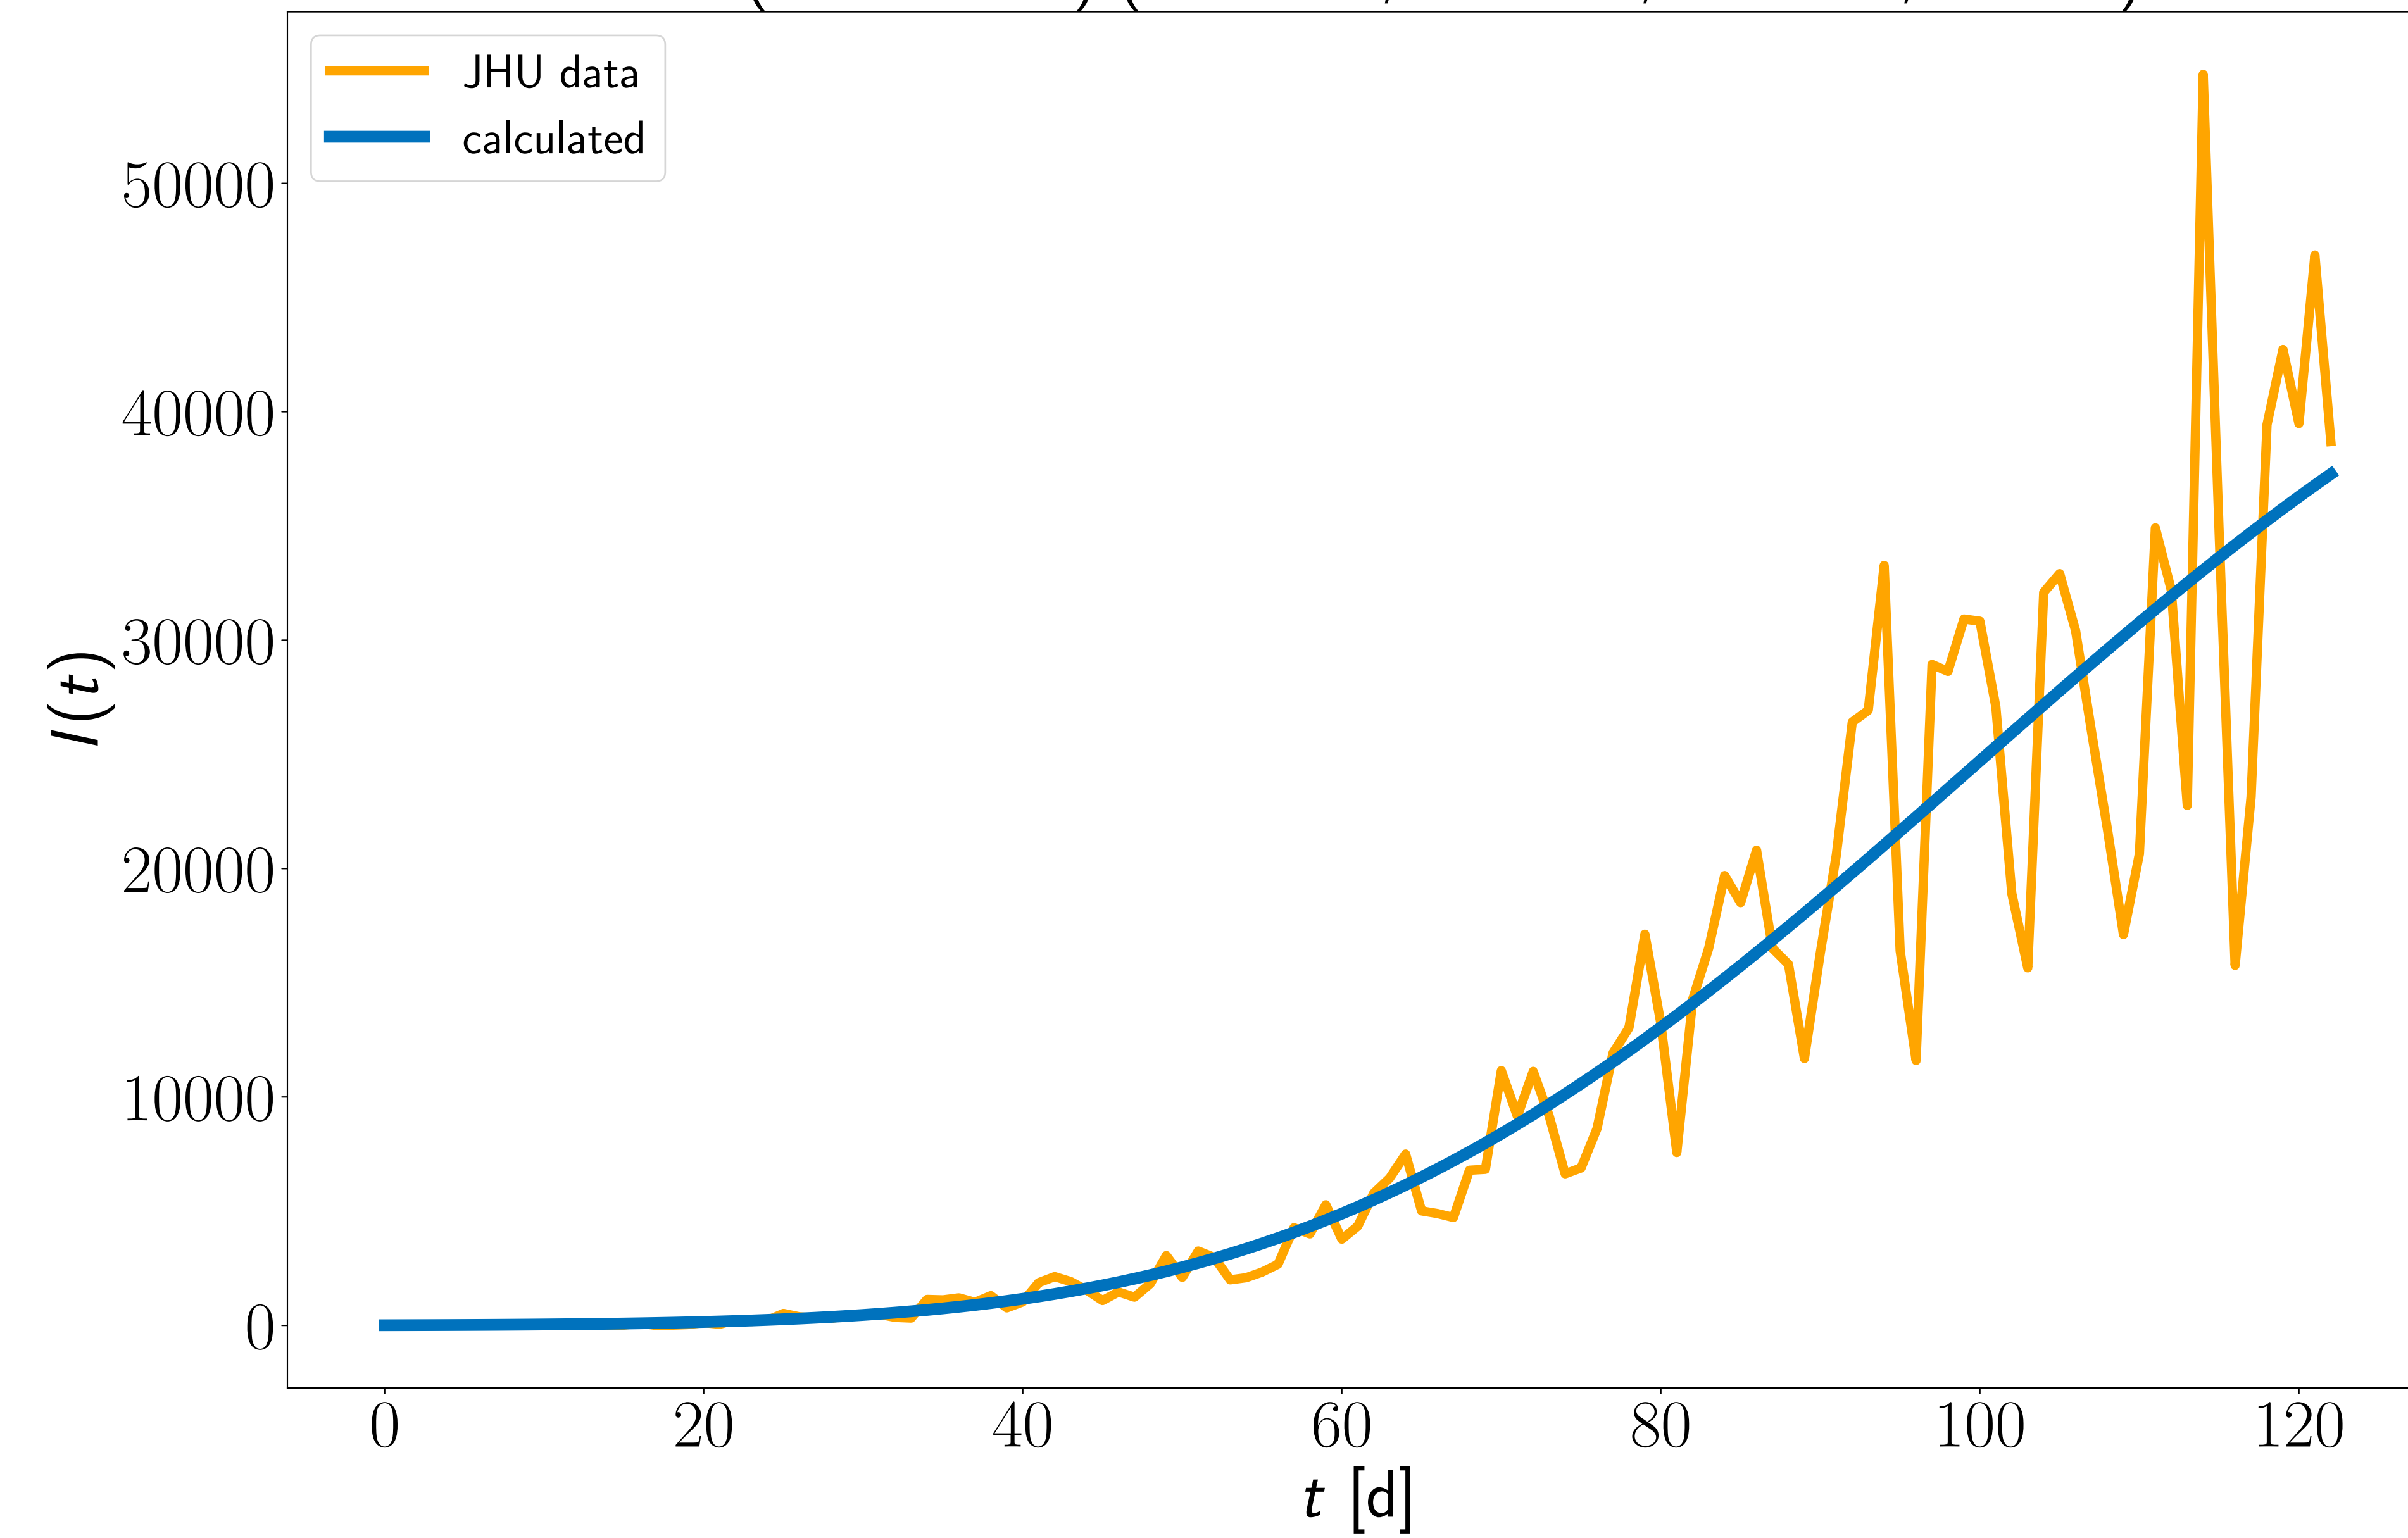

Brazil ( $R^2 = 0.987$ ) (i: 3000.0, a: 0.069, b: 0.009, t: 52.5)

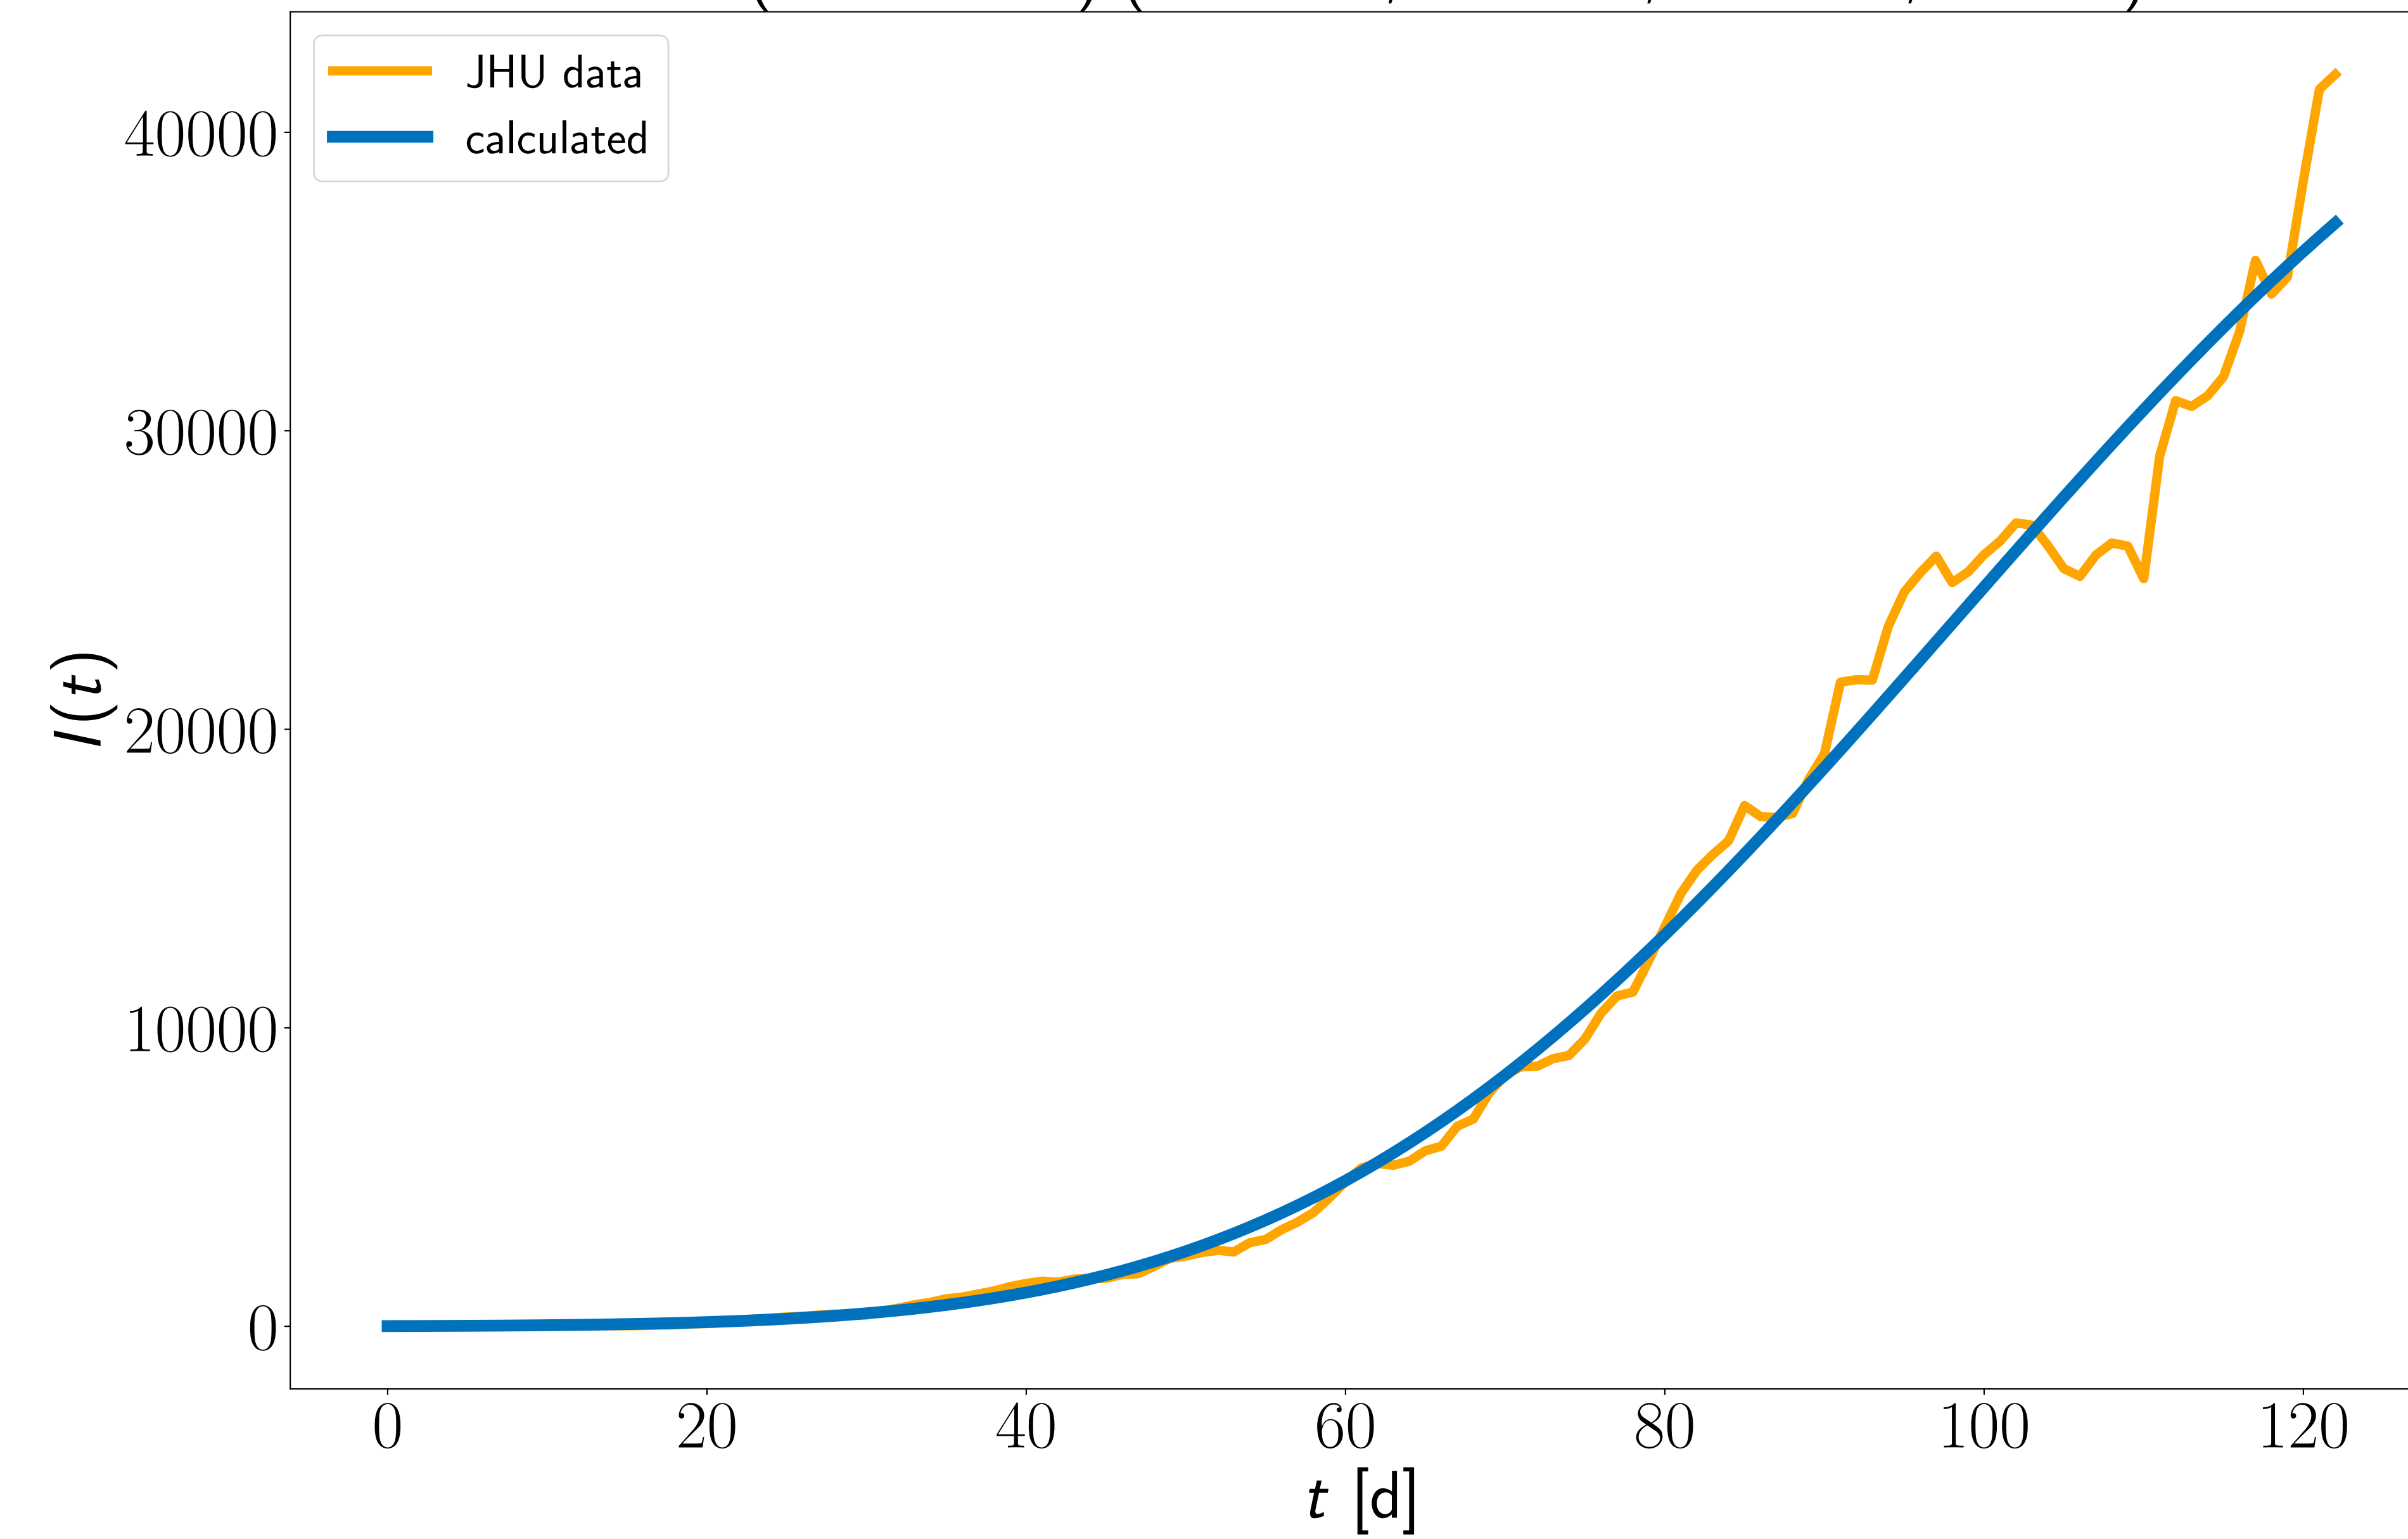

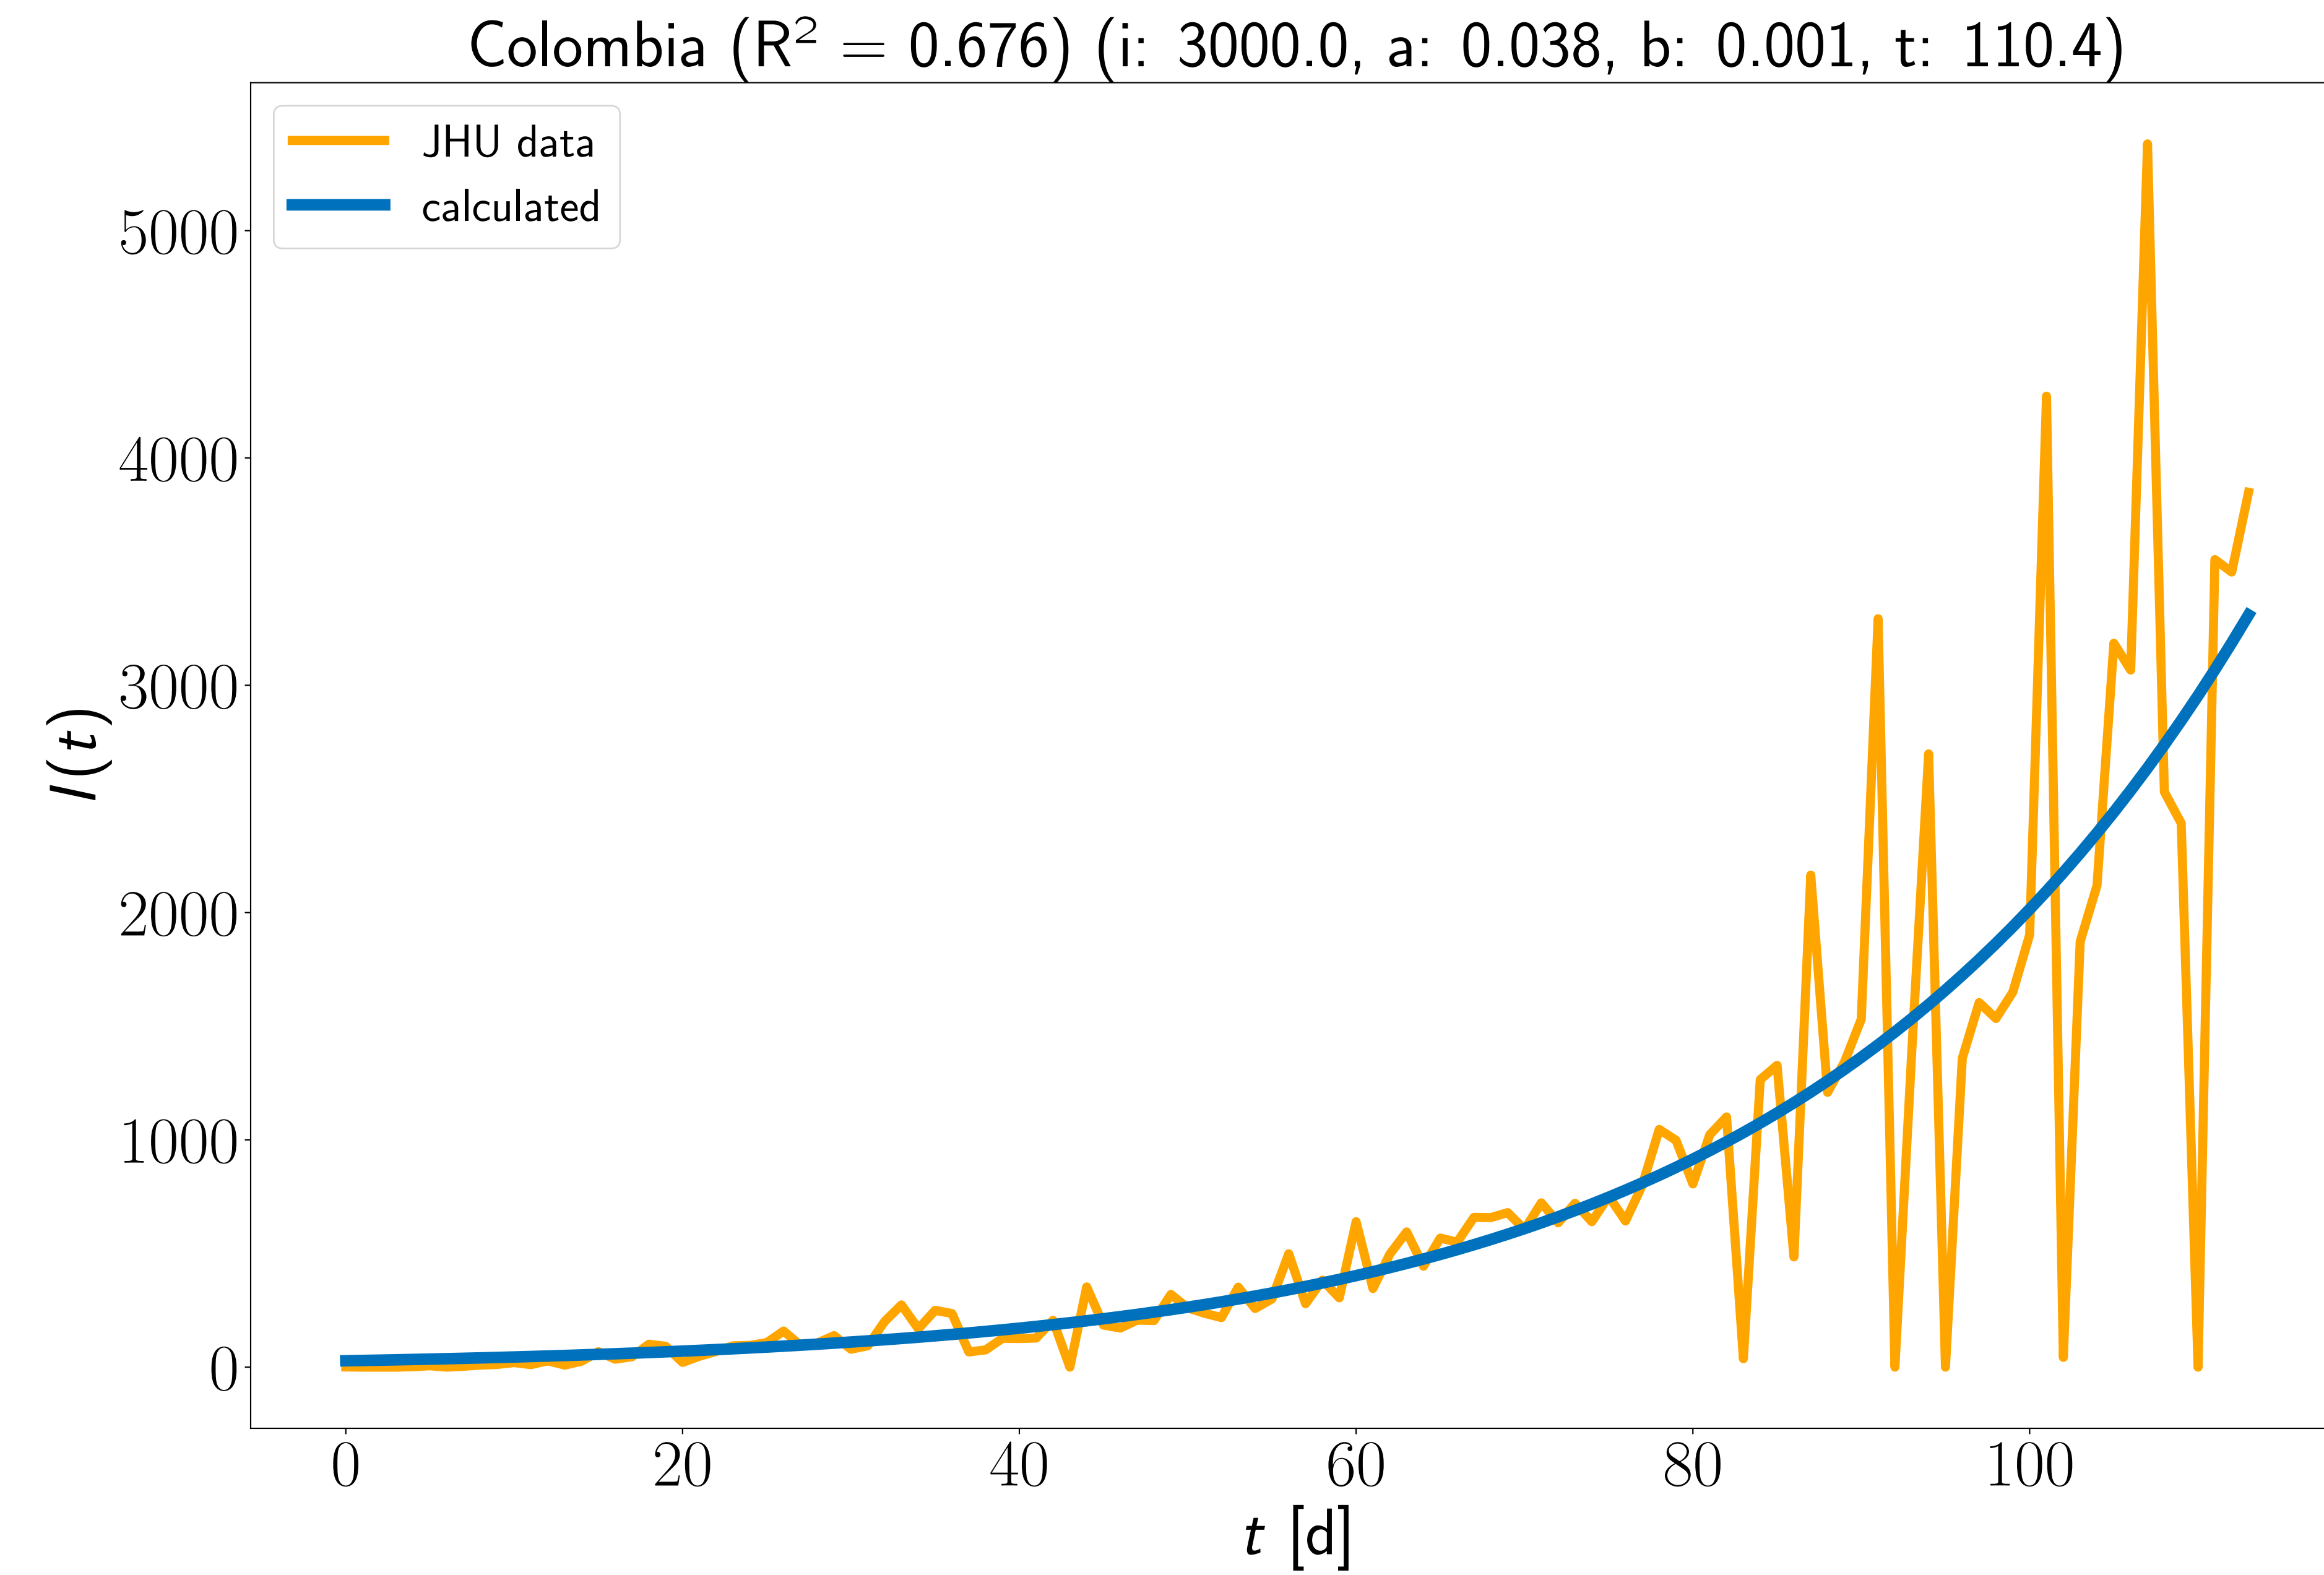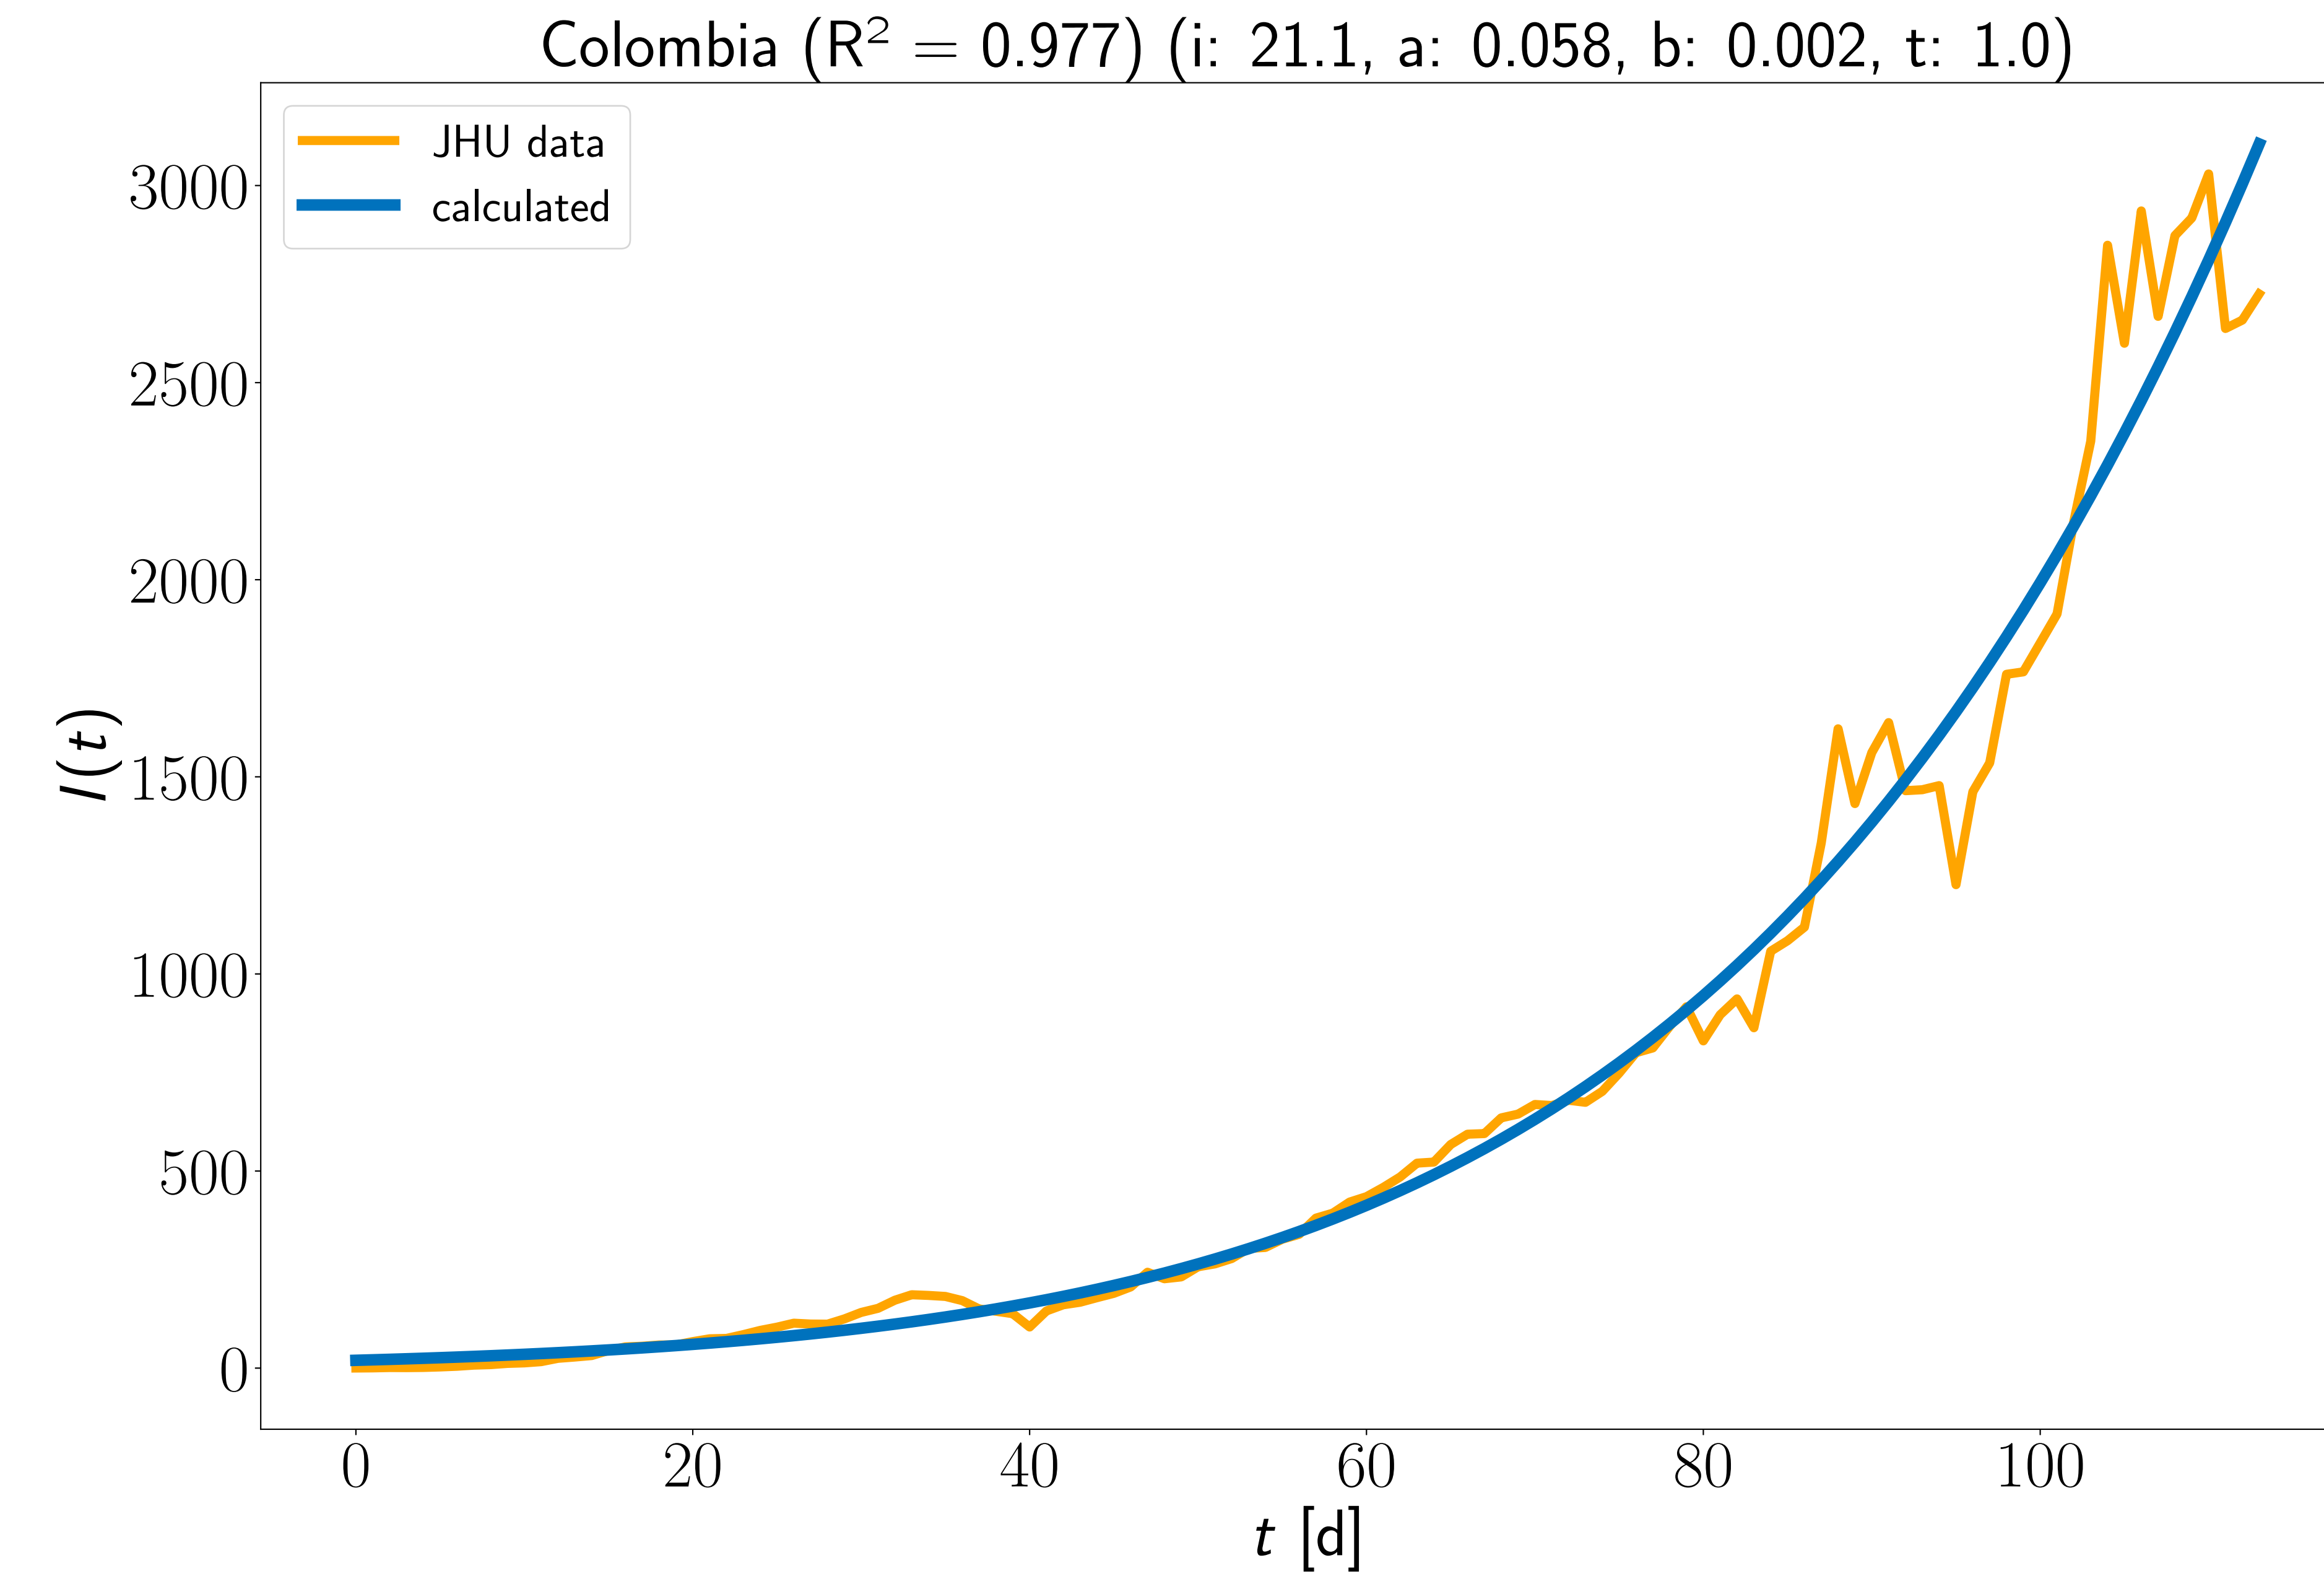

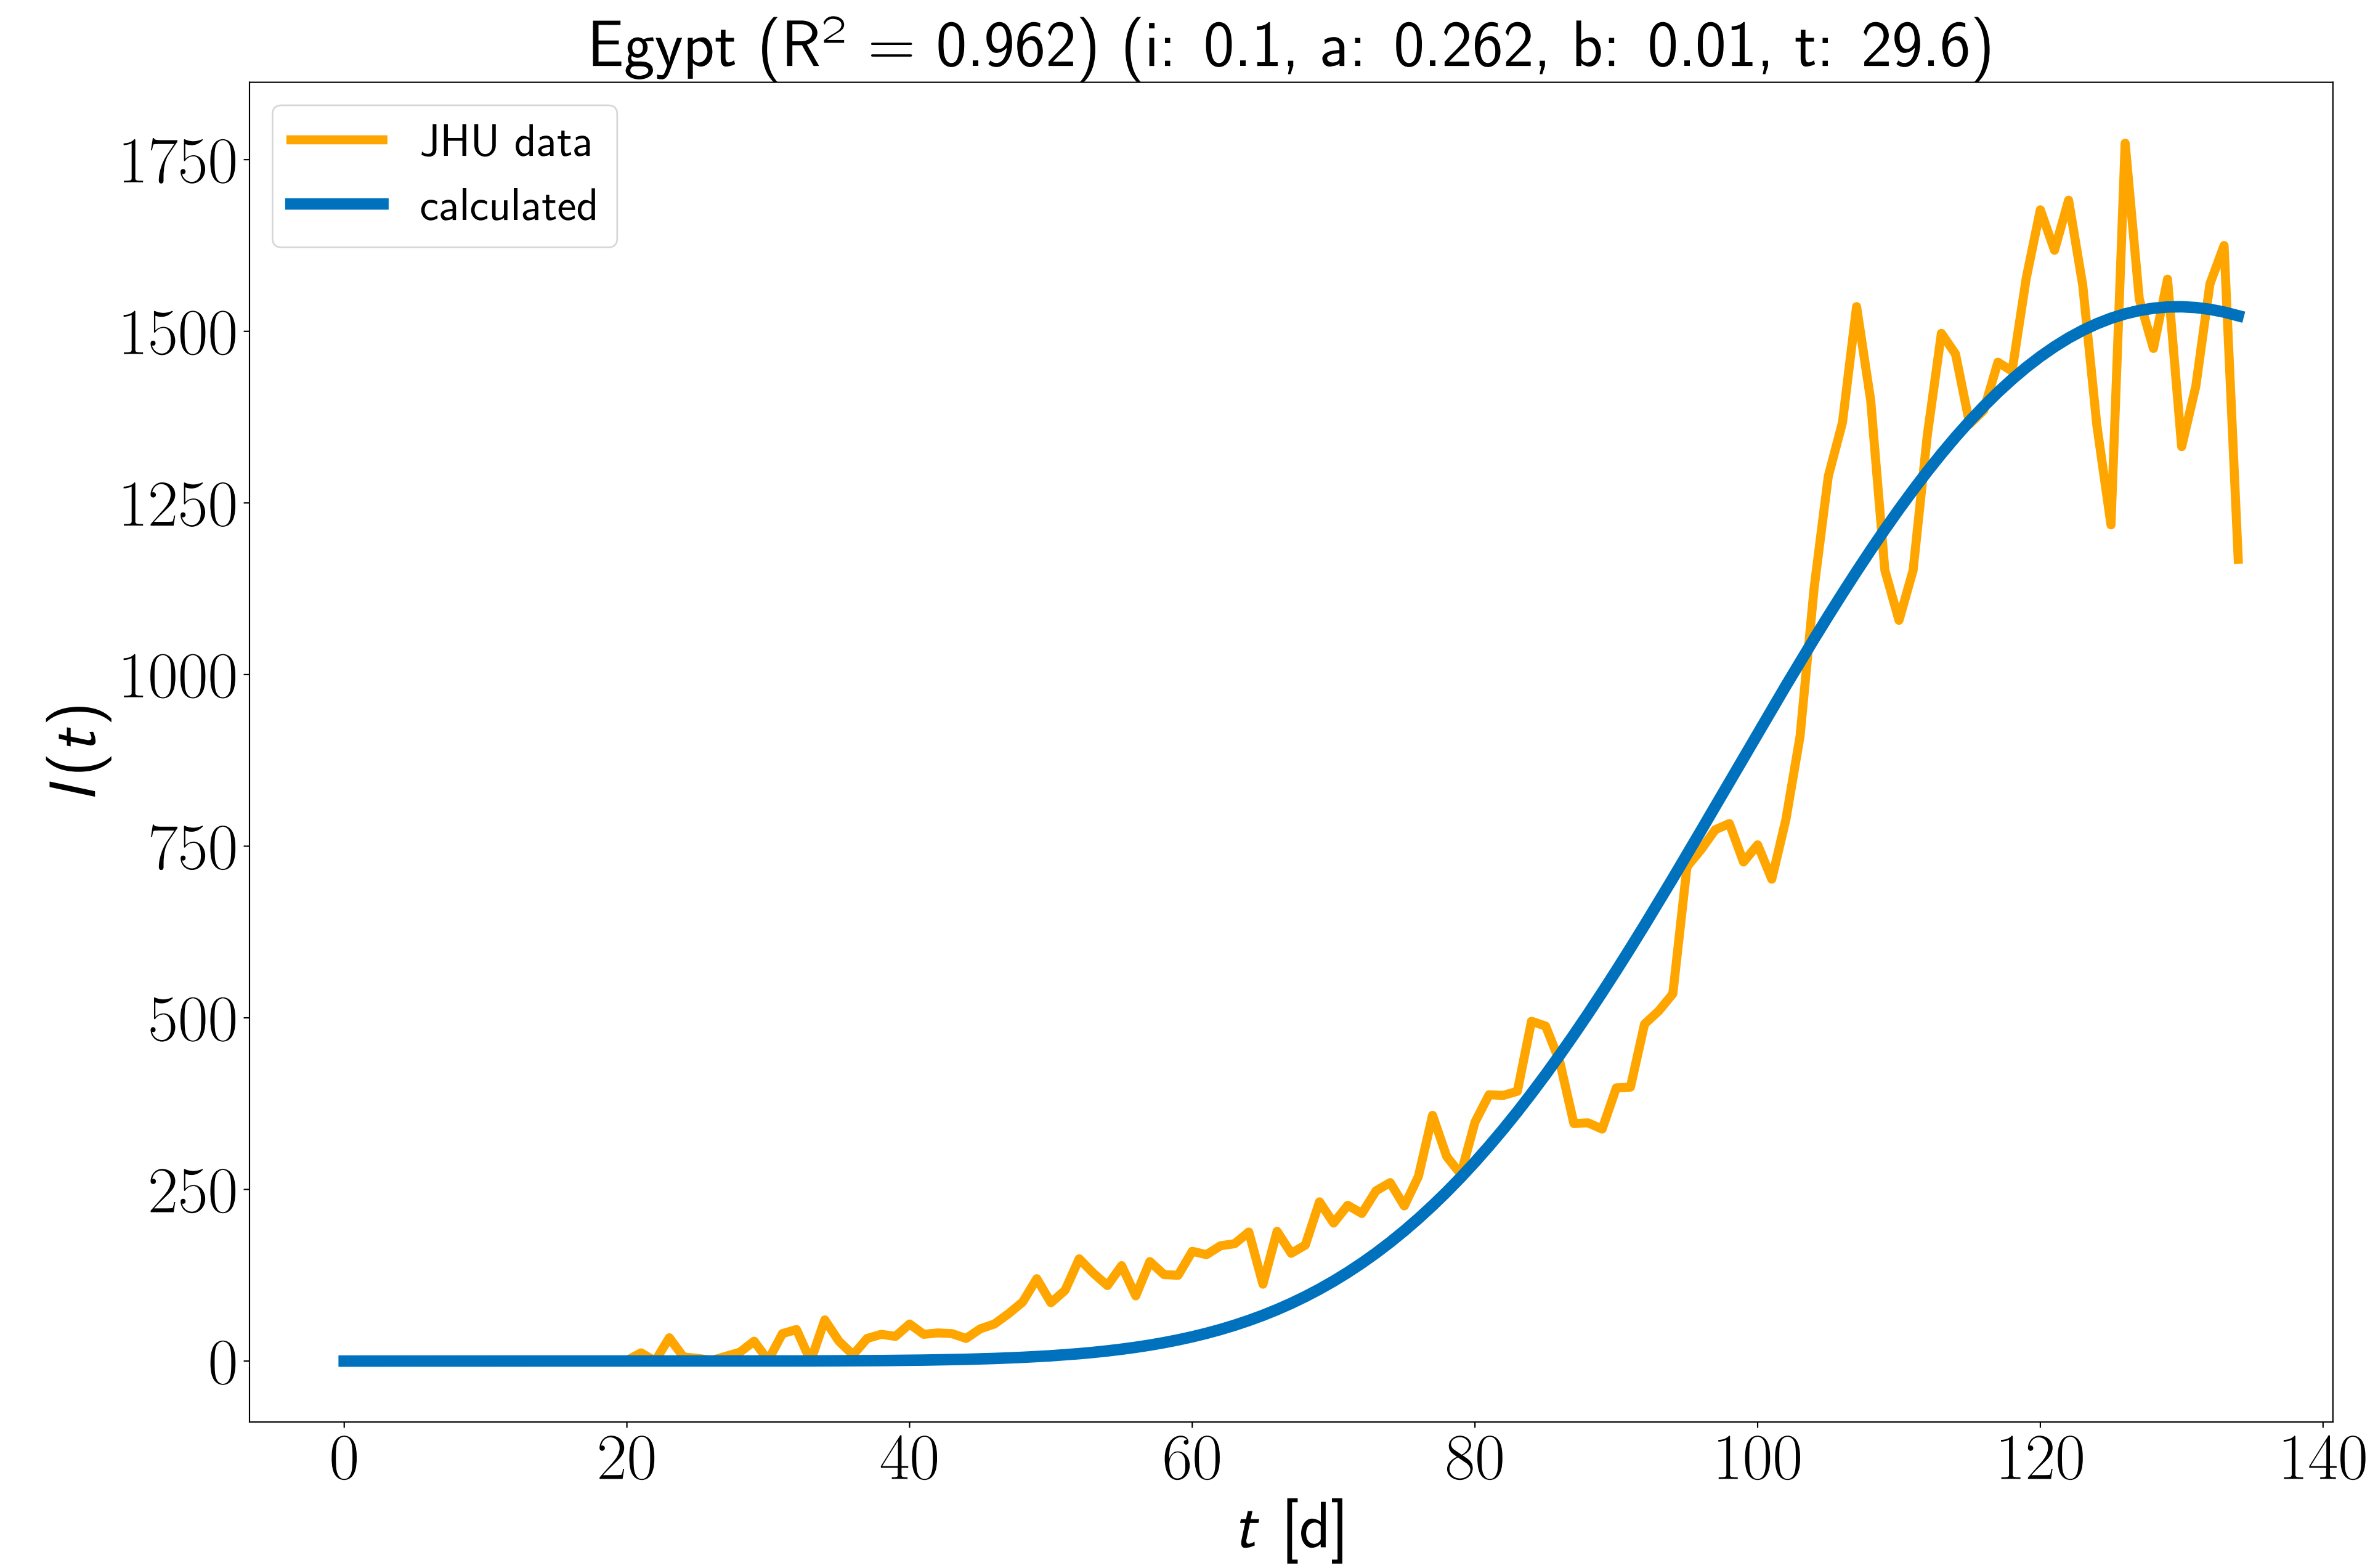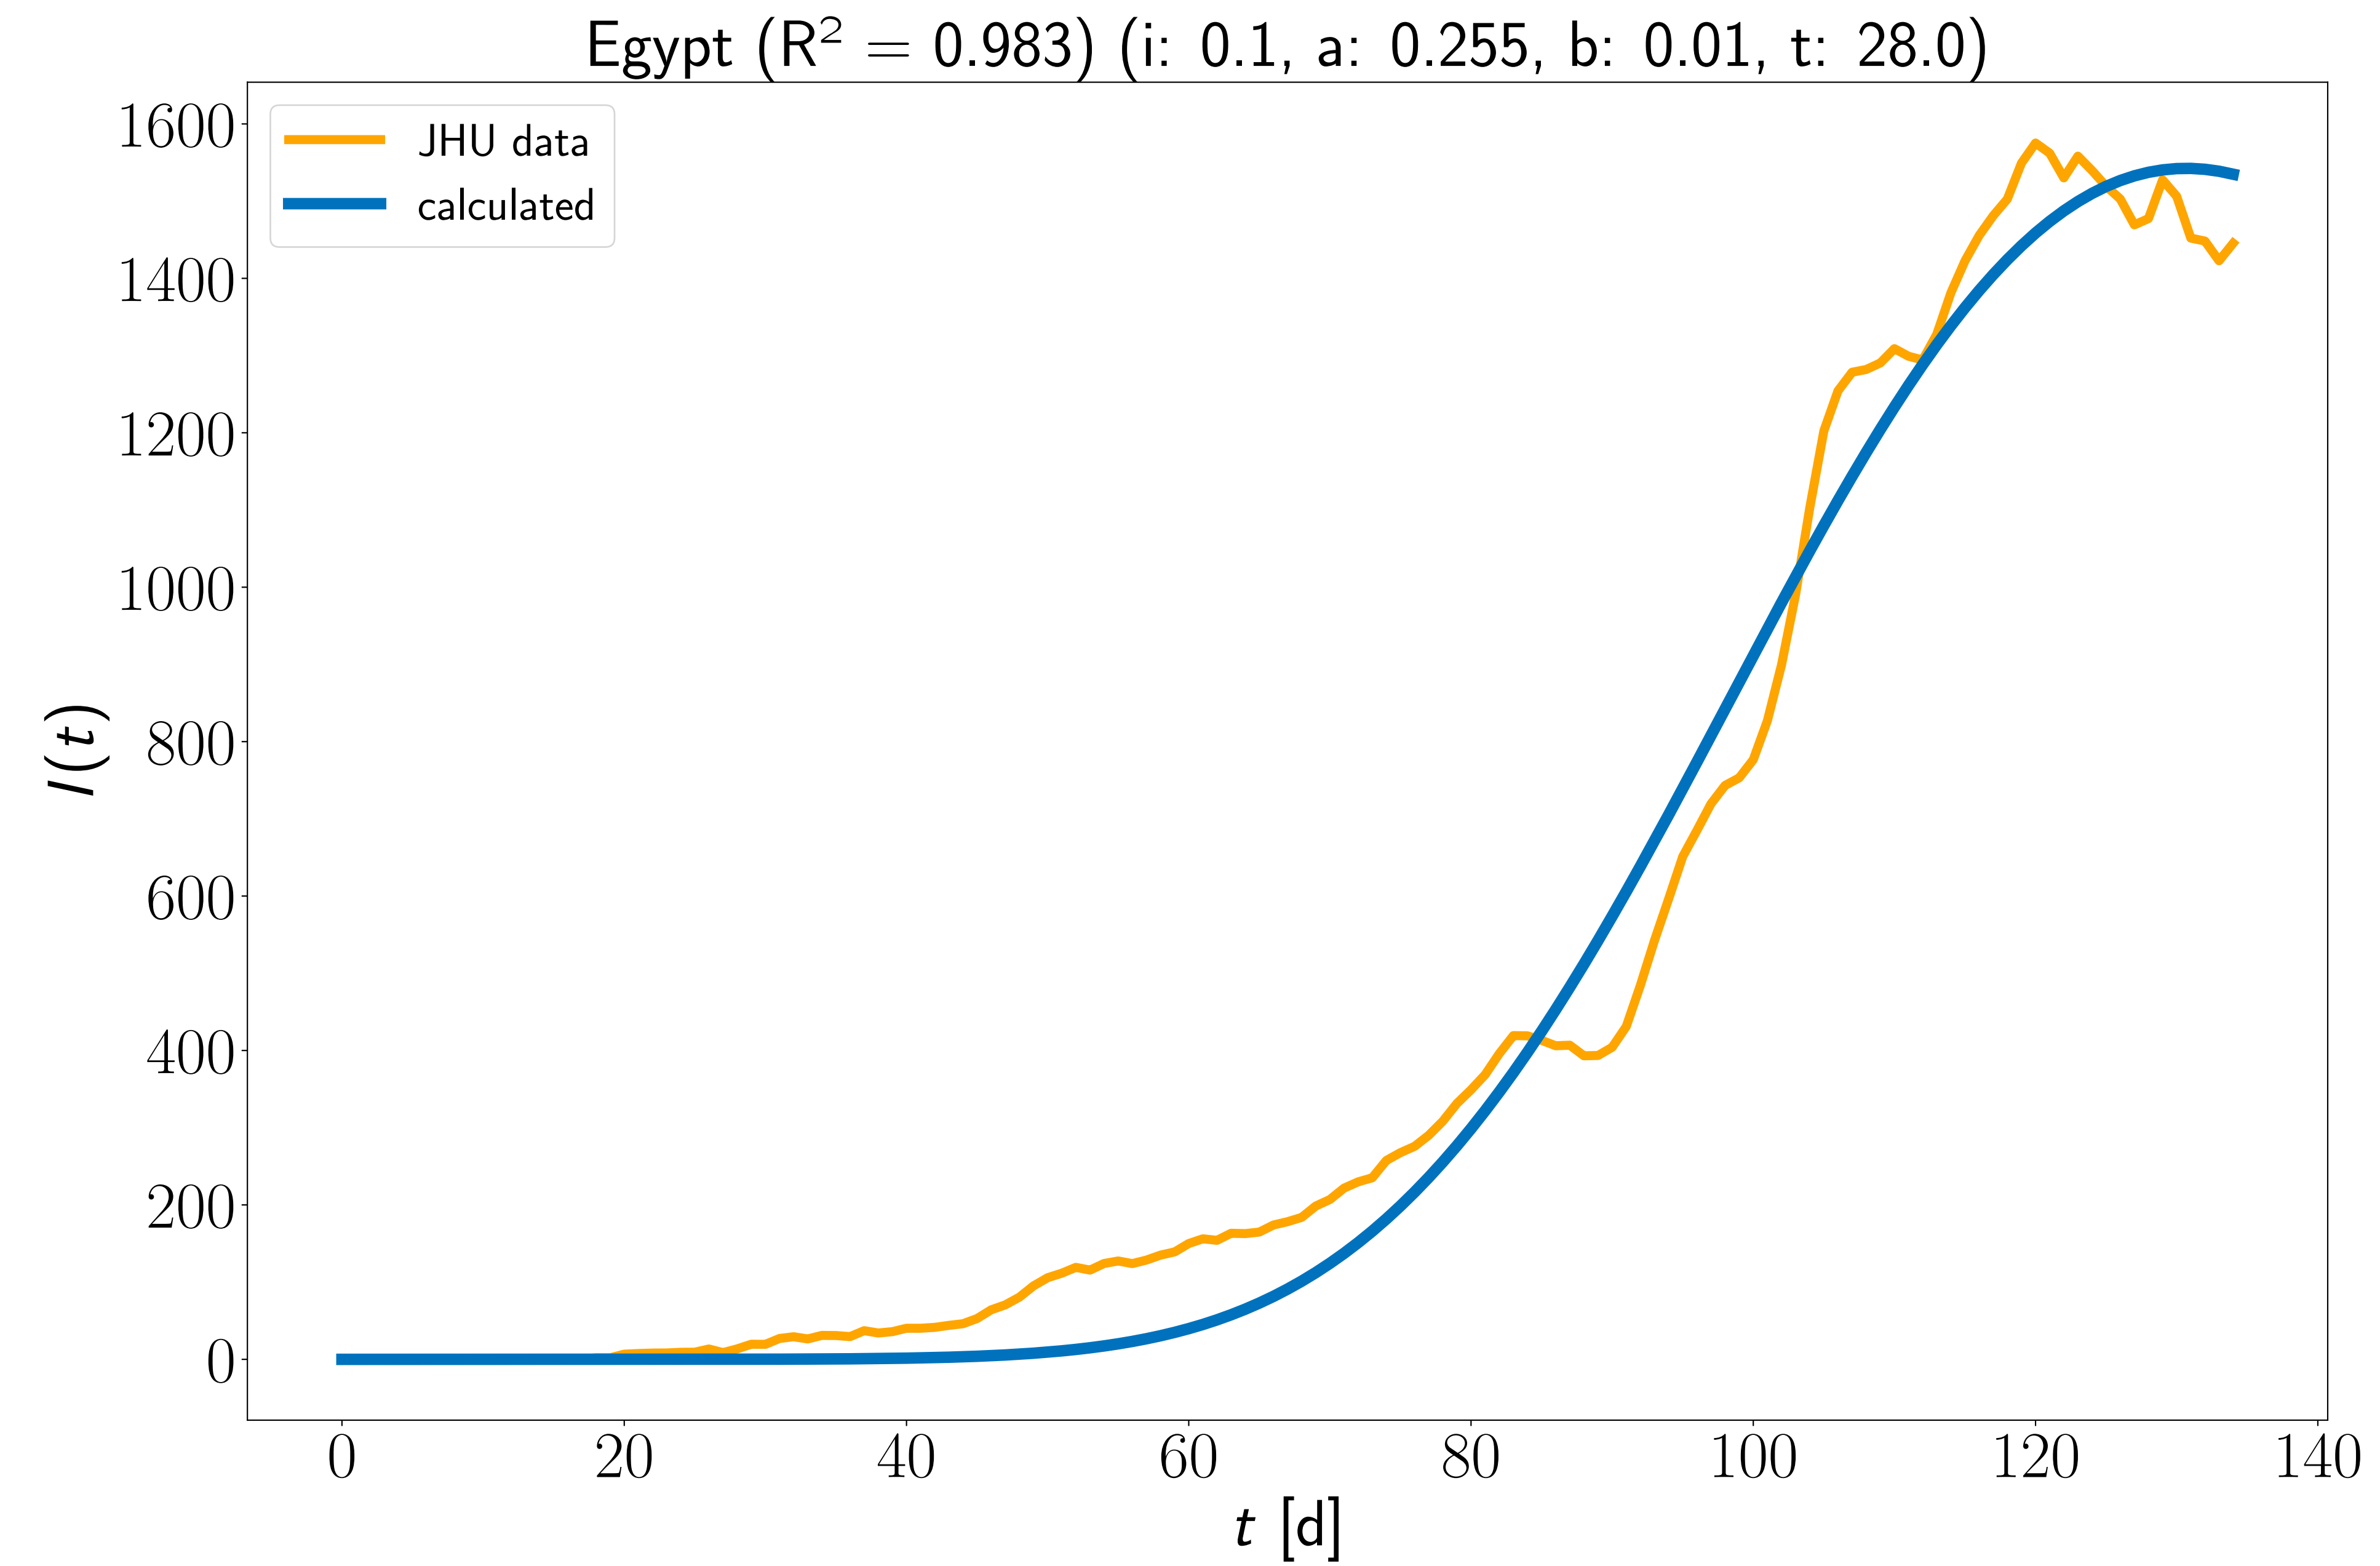

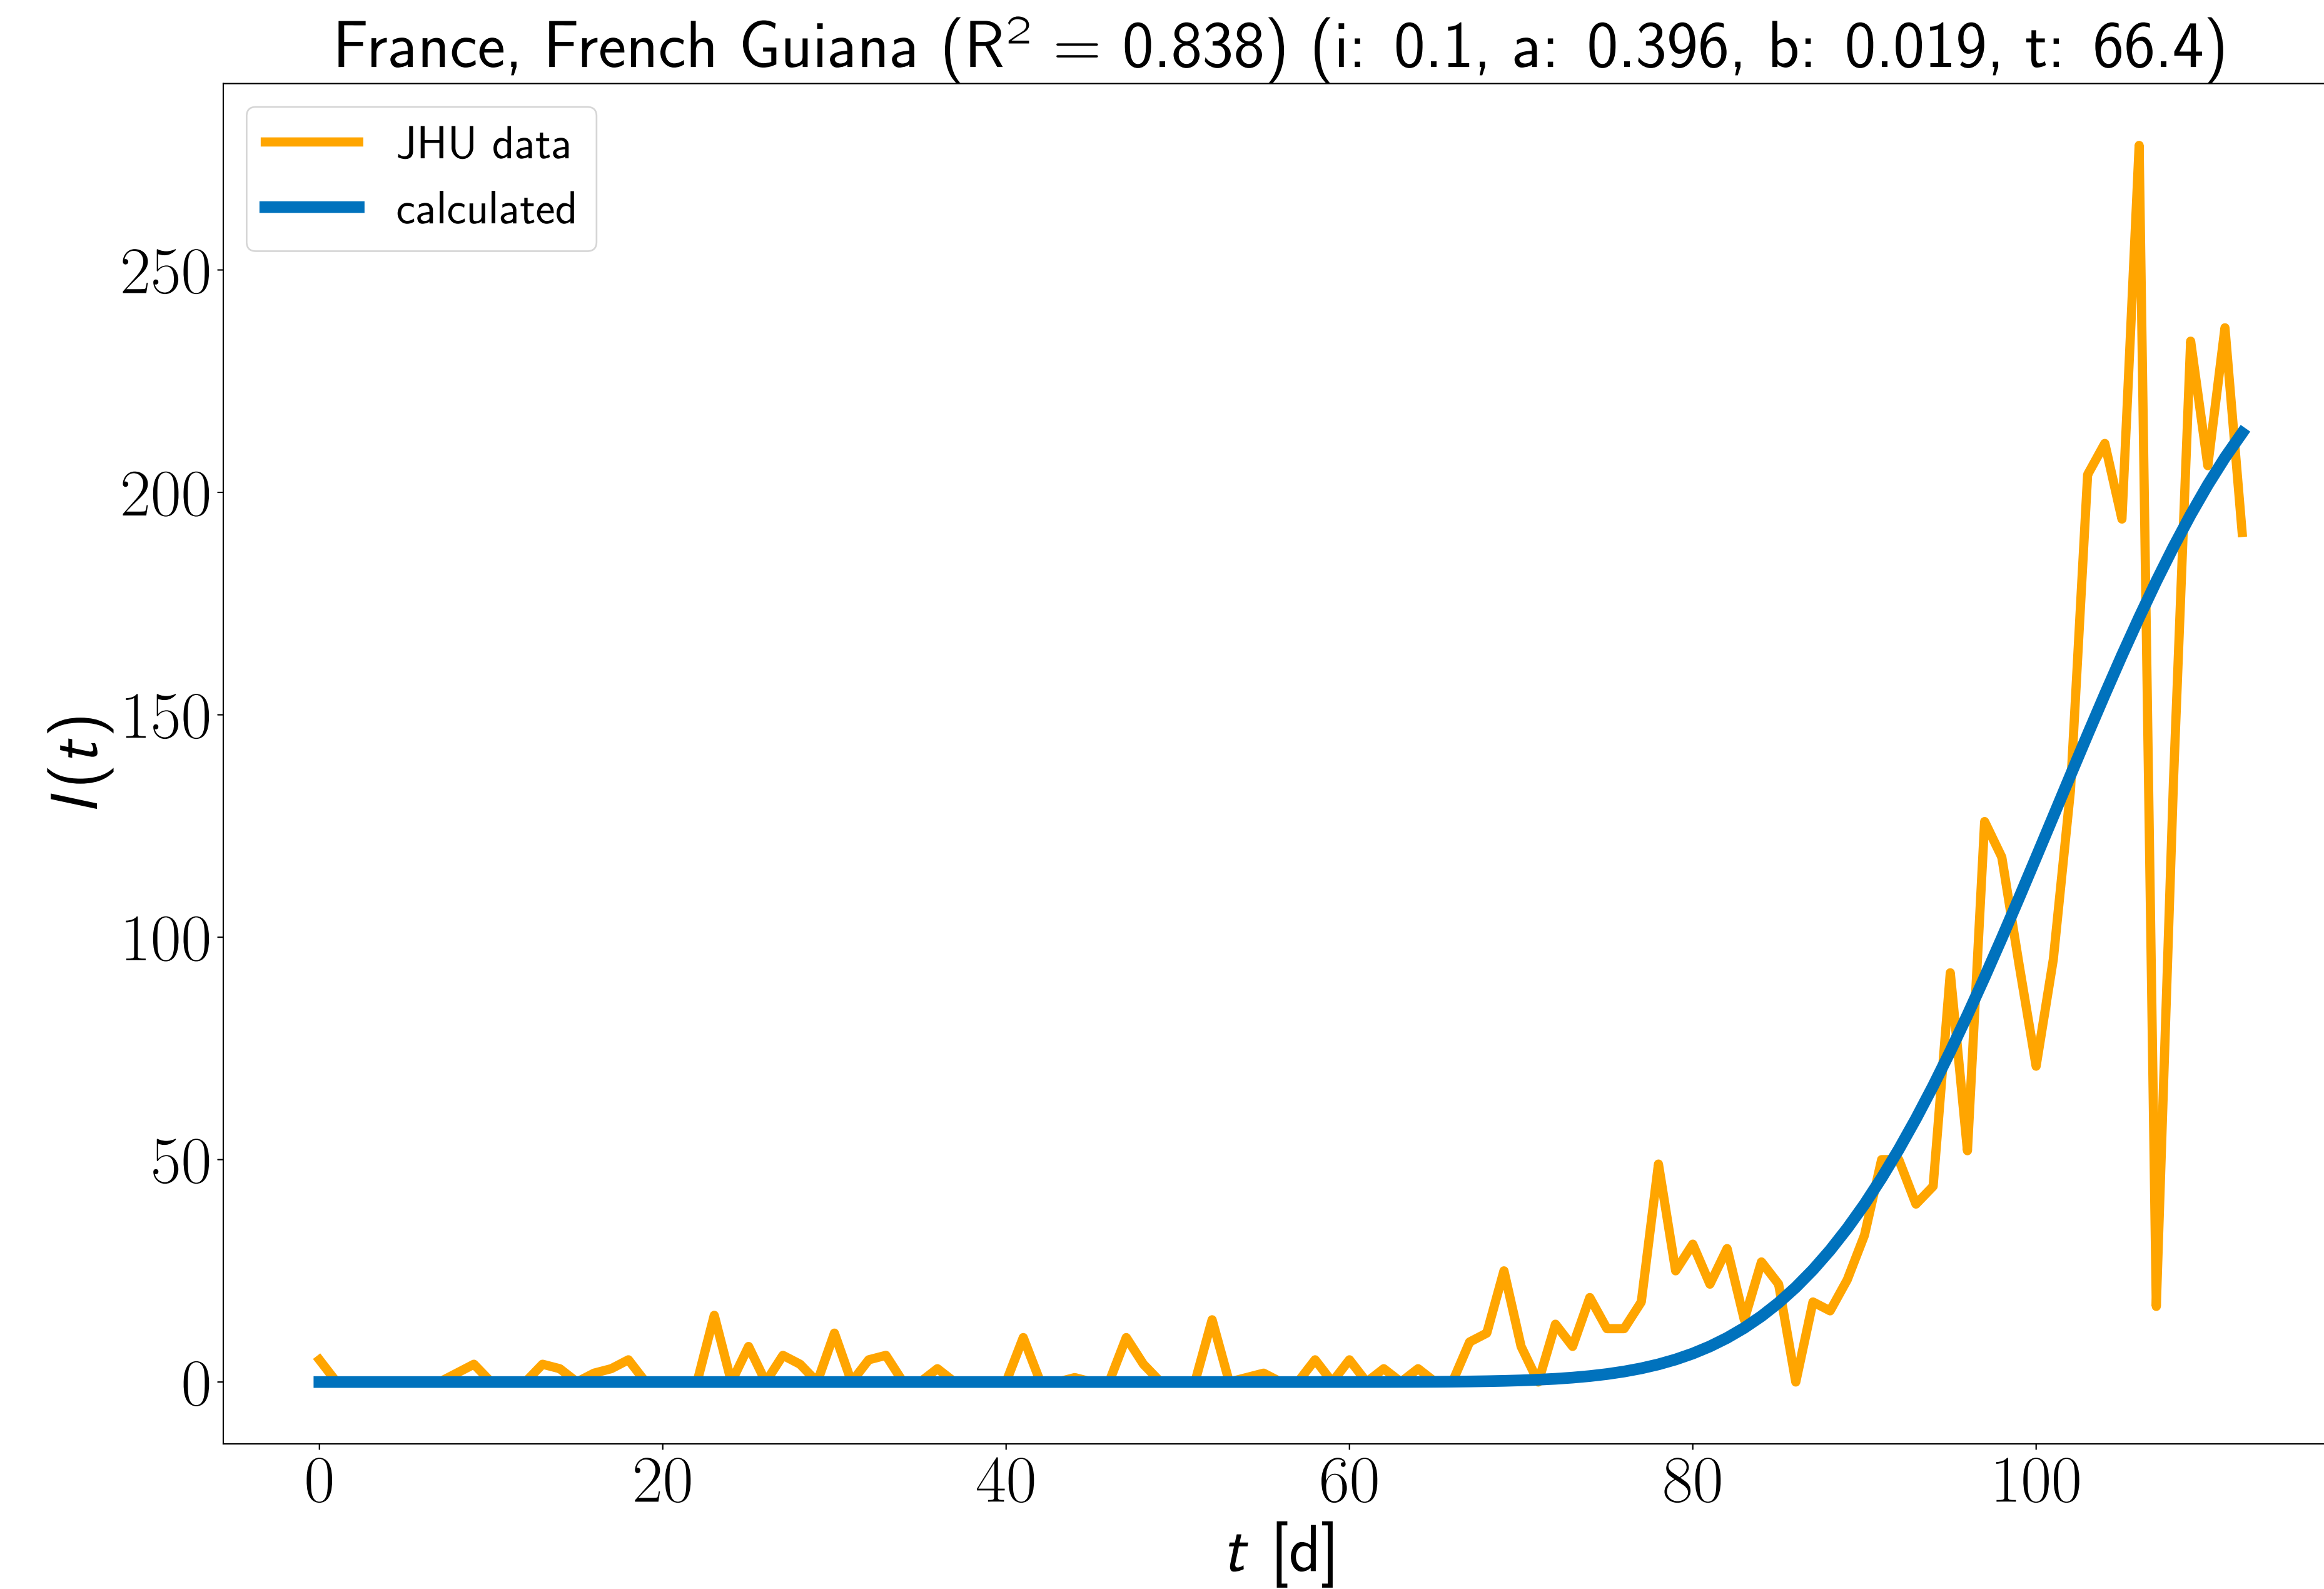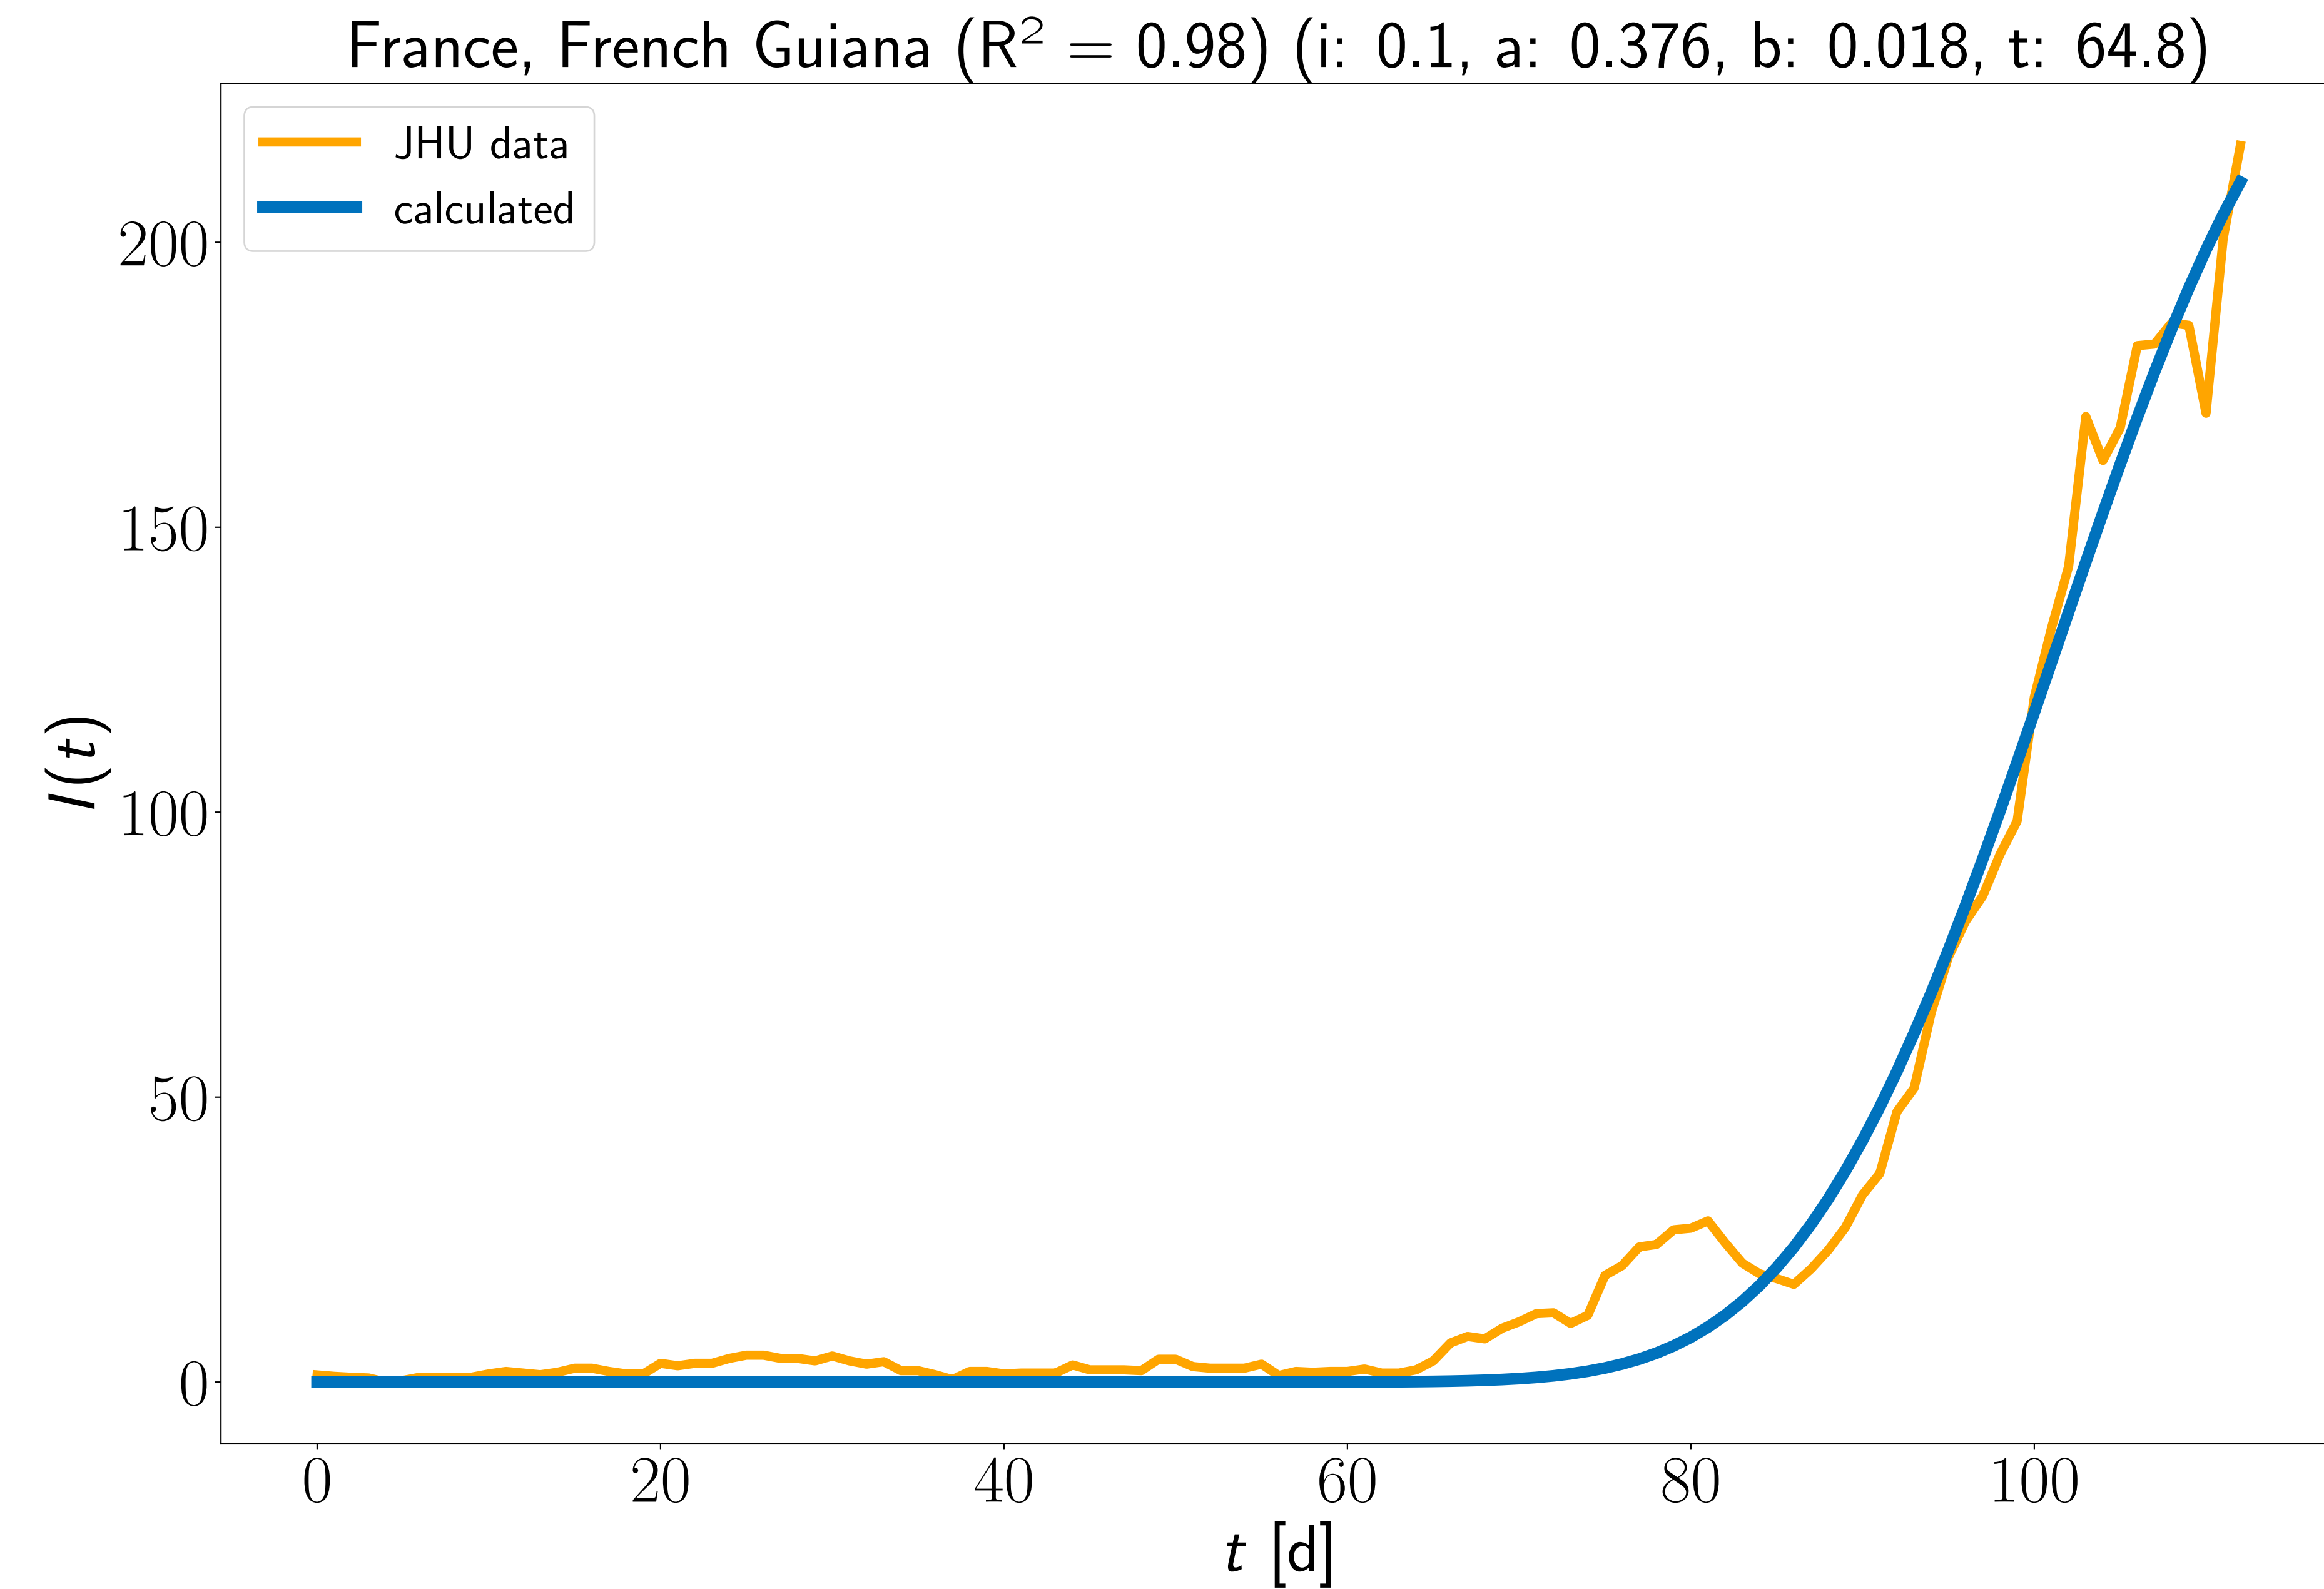

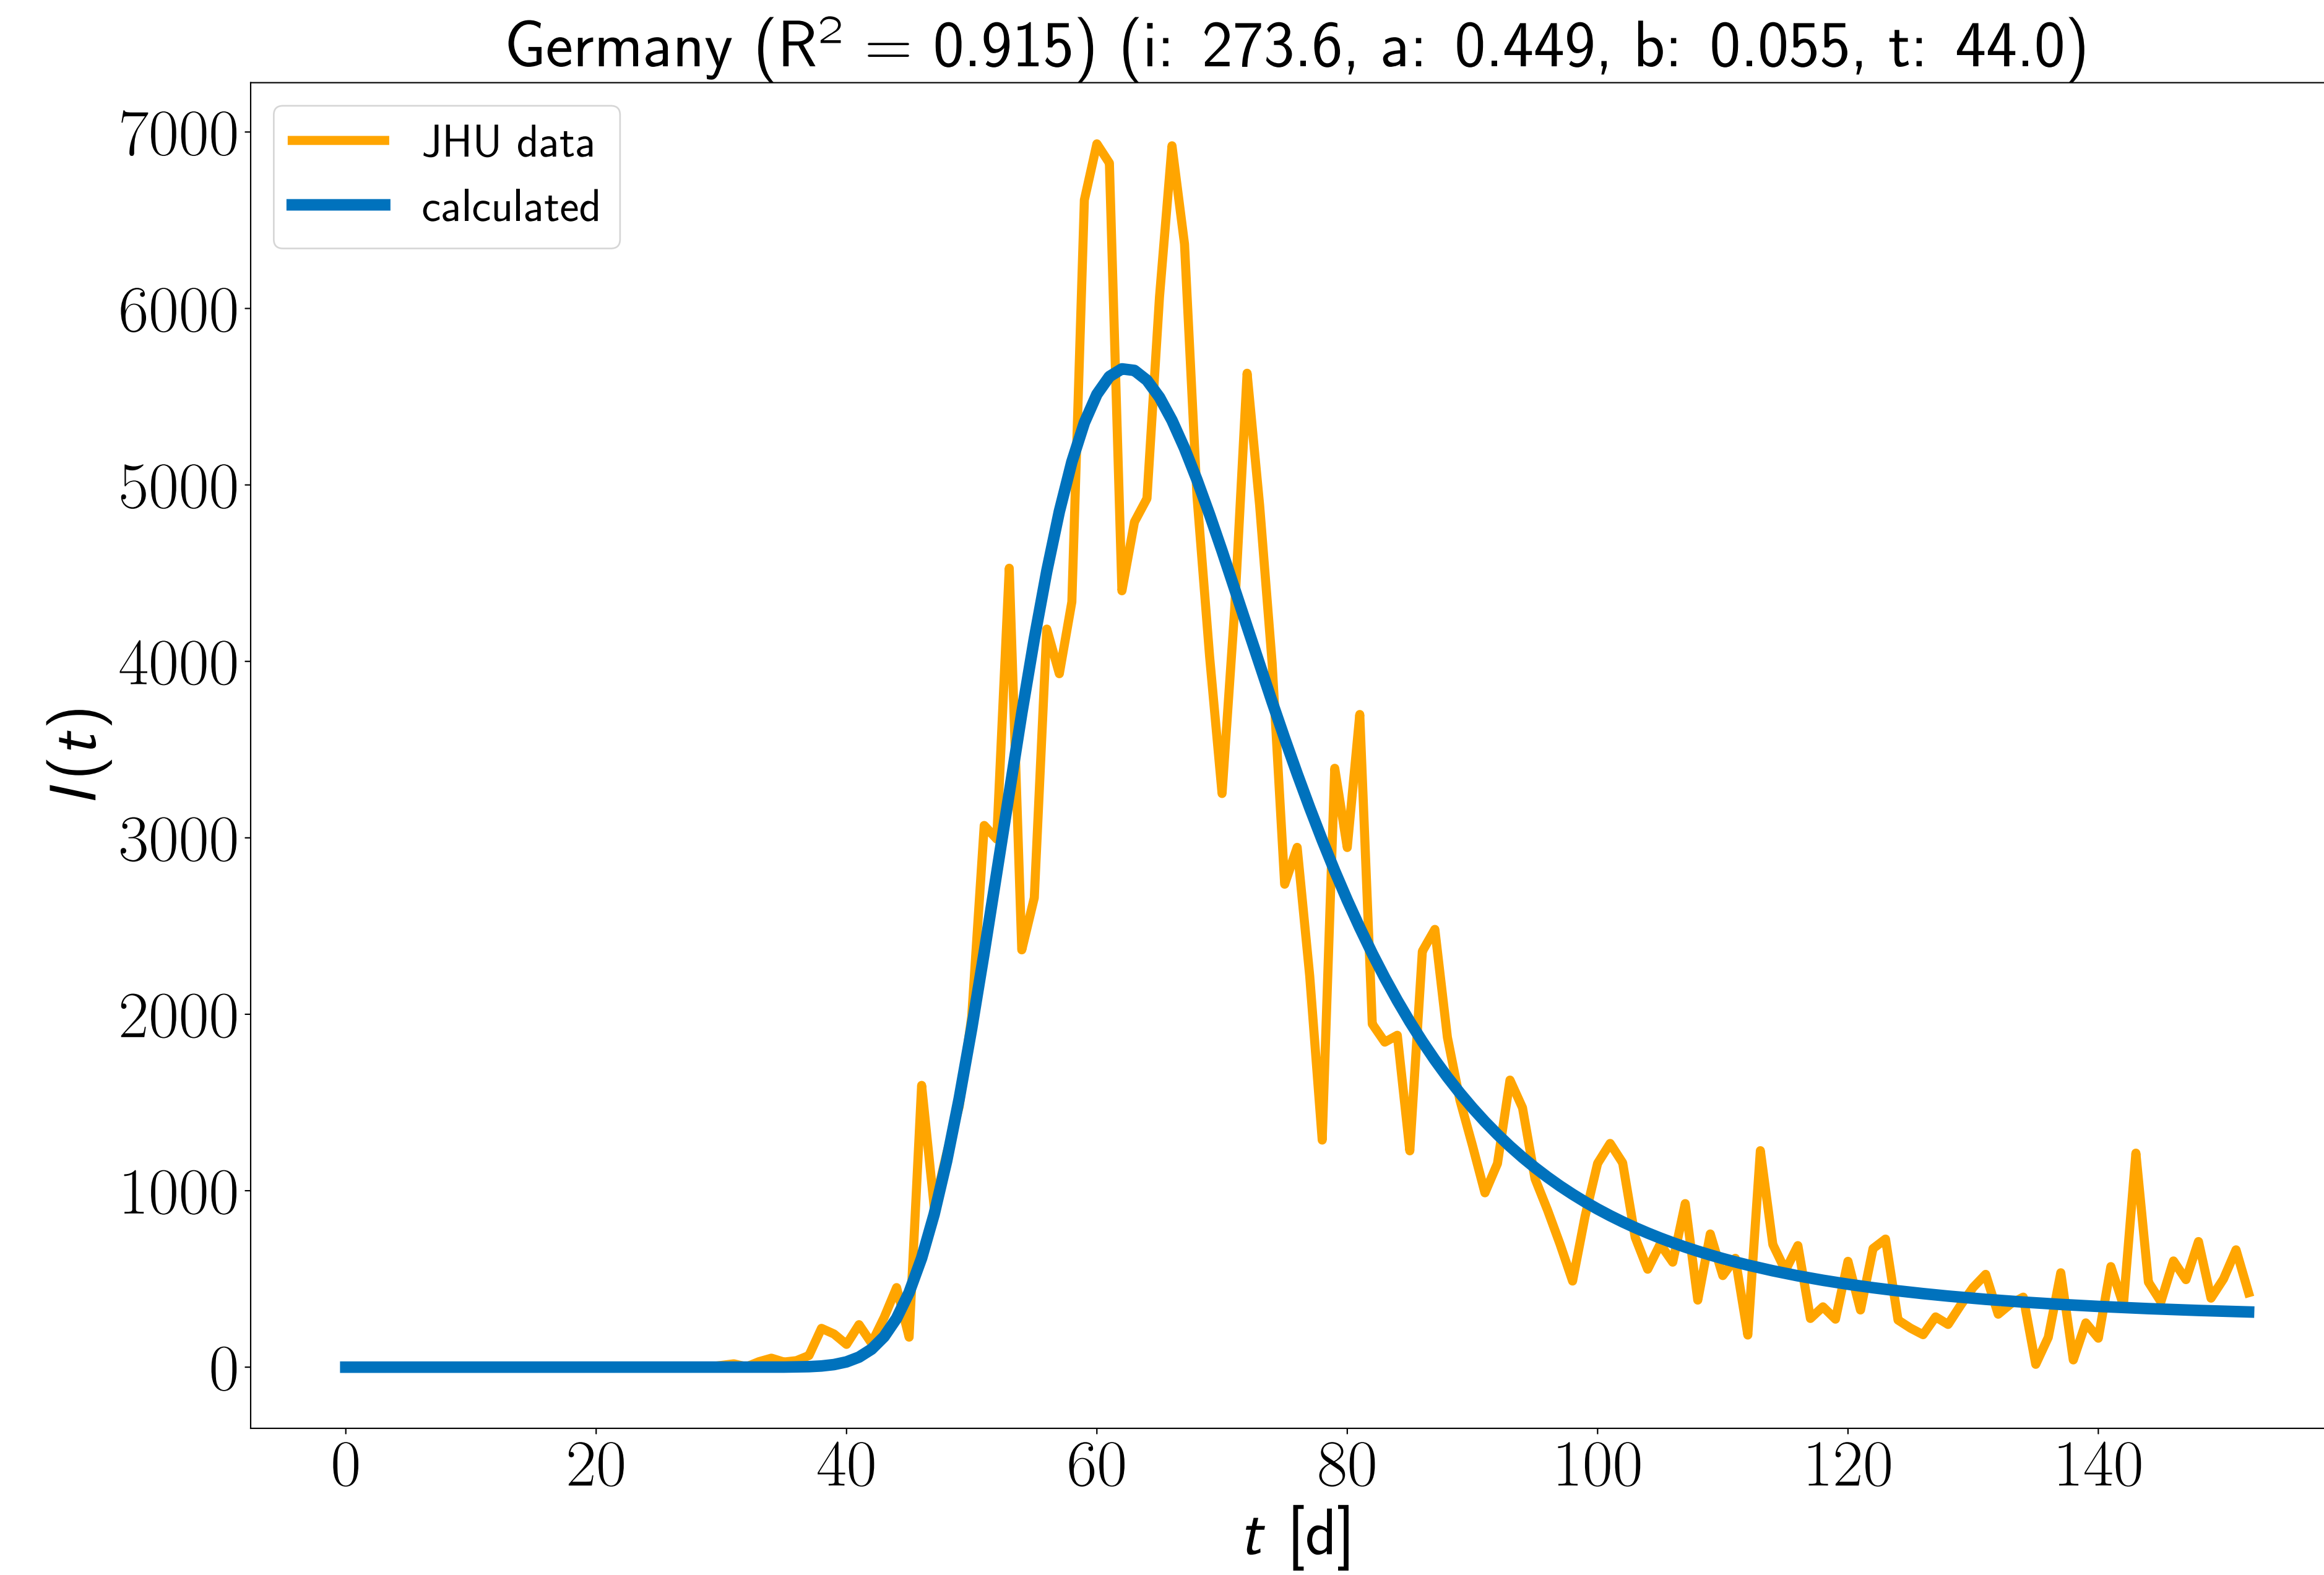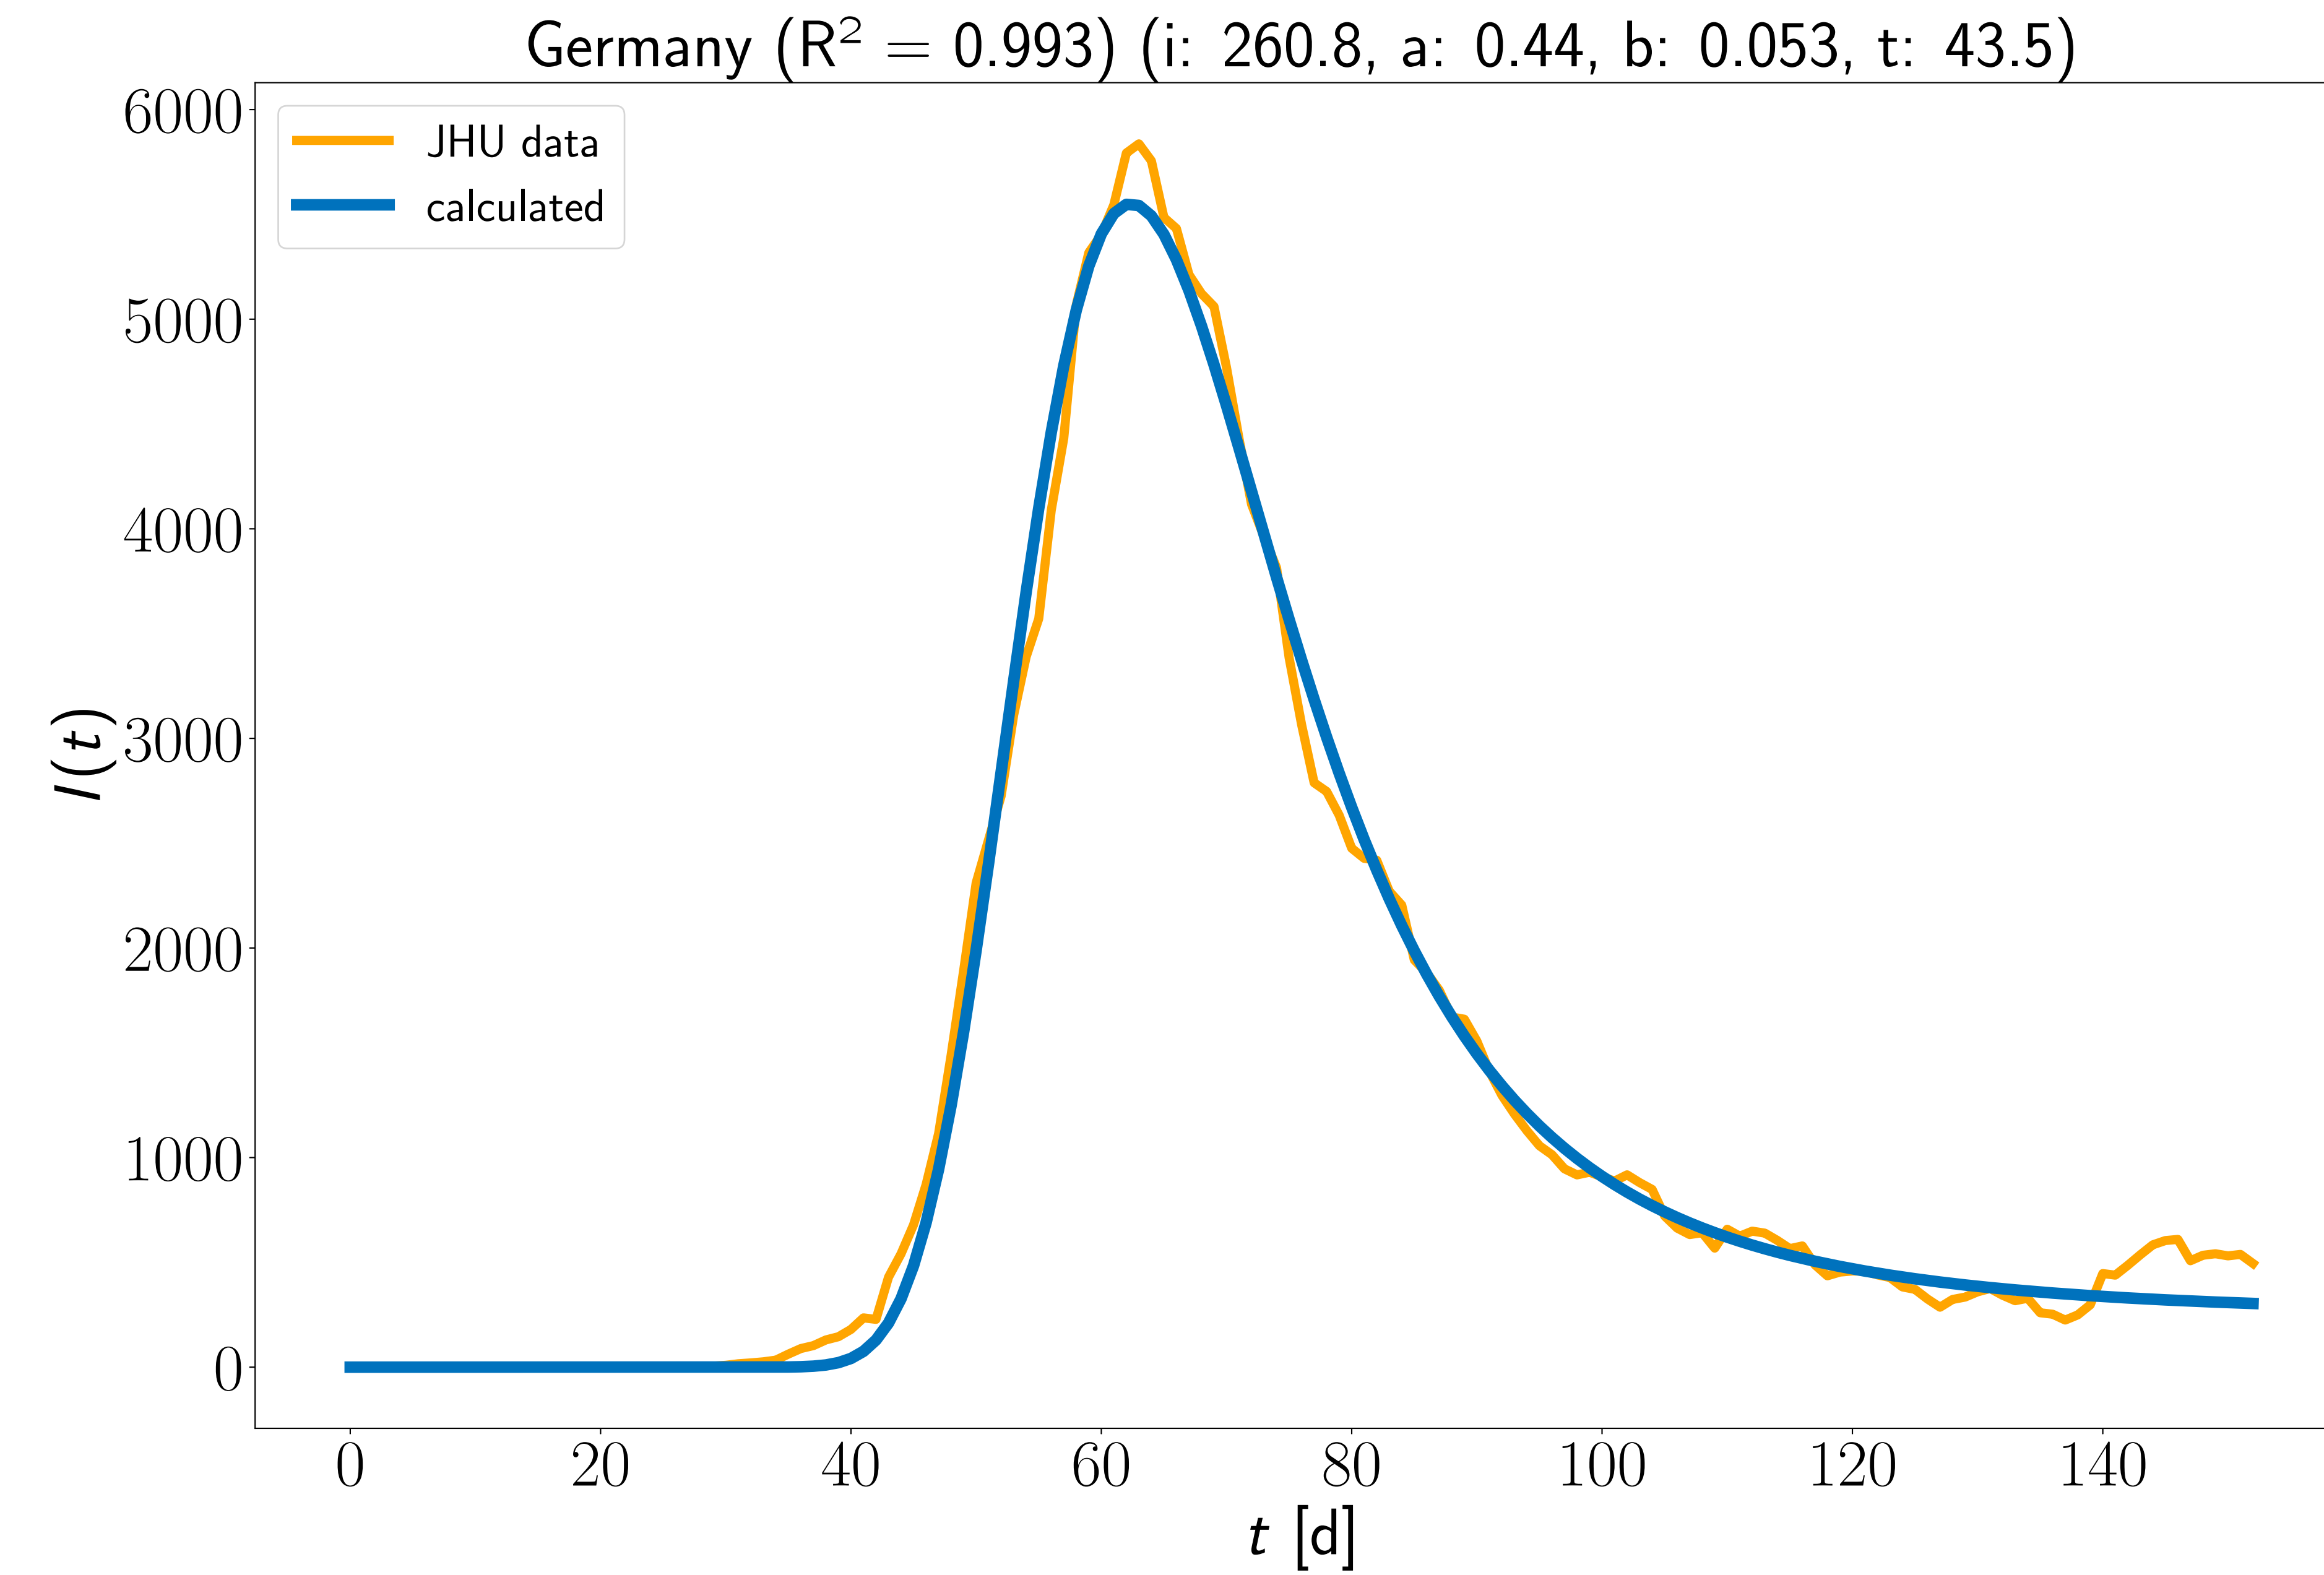

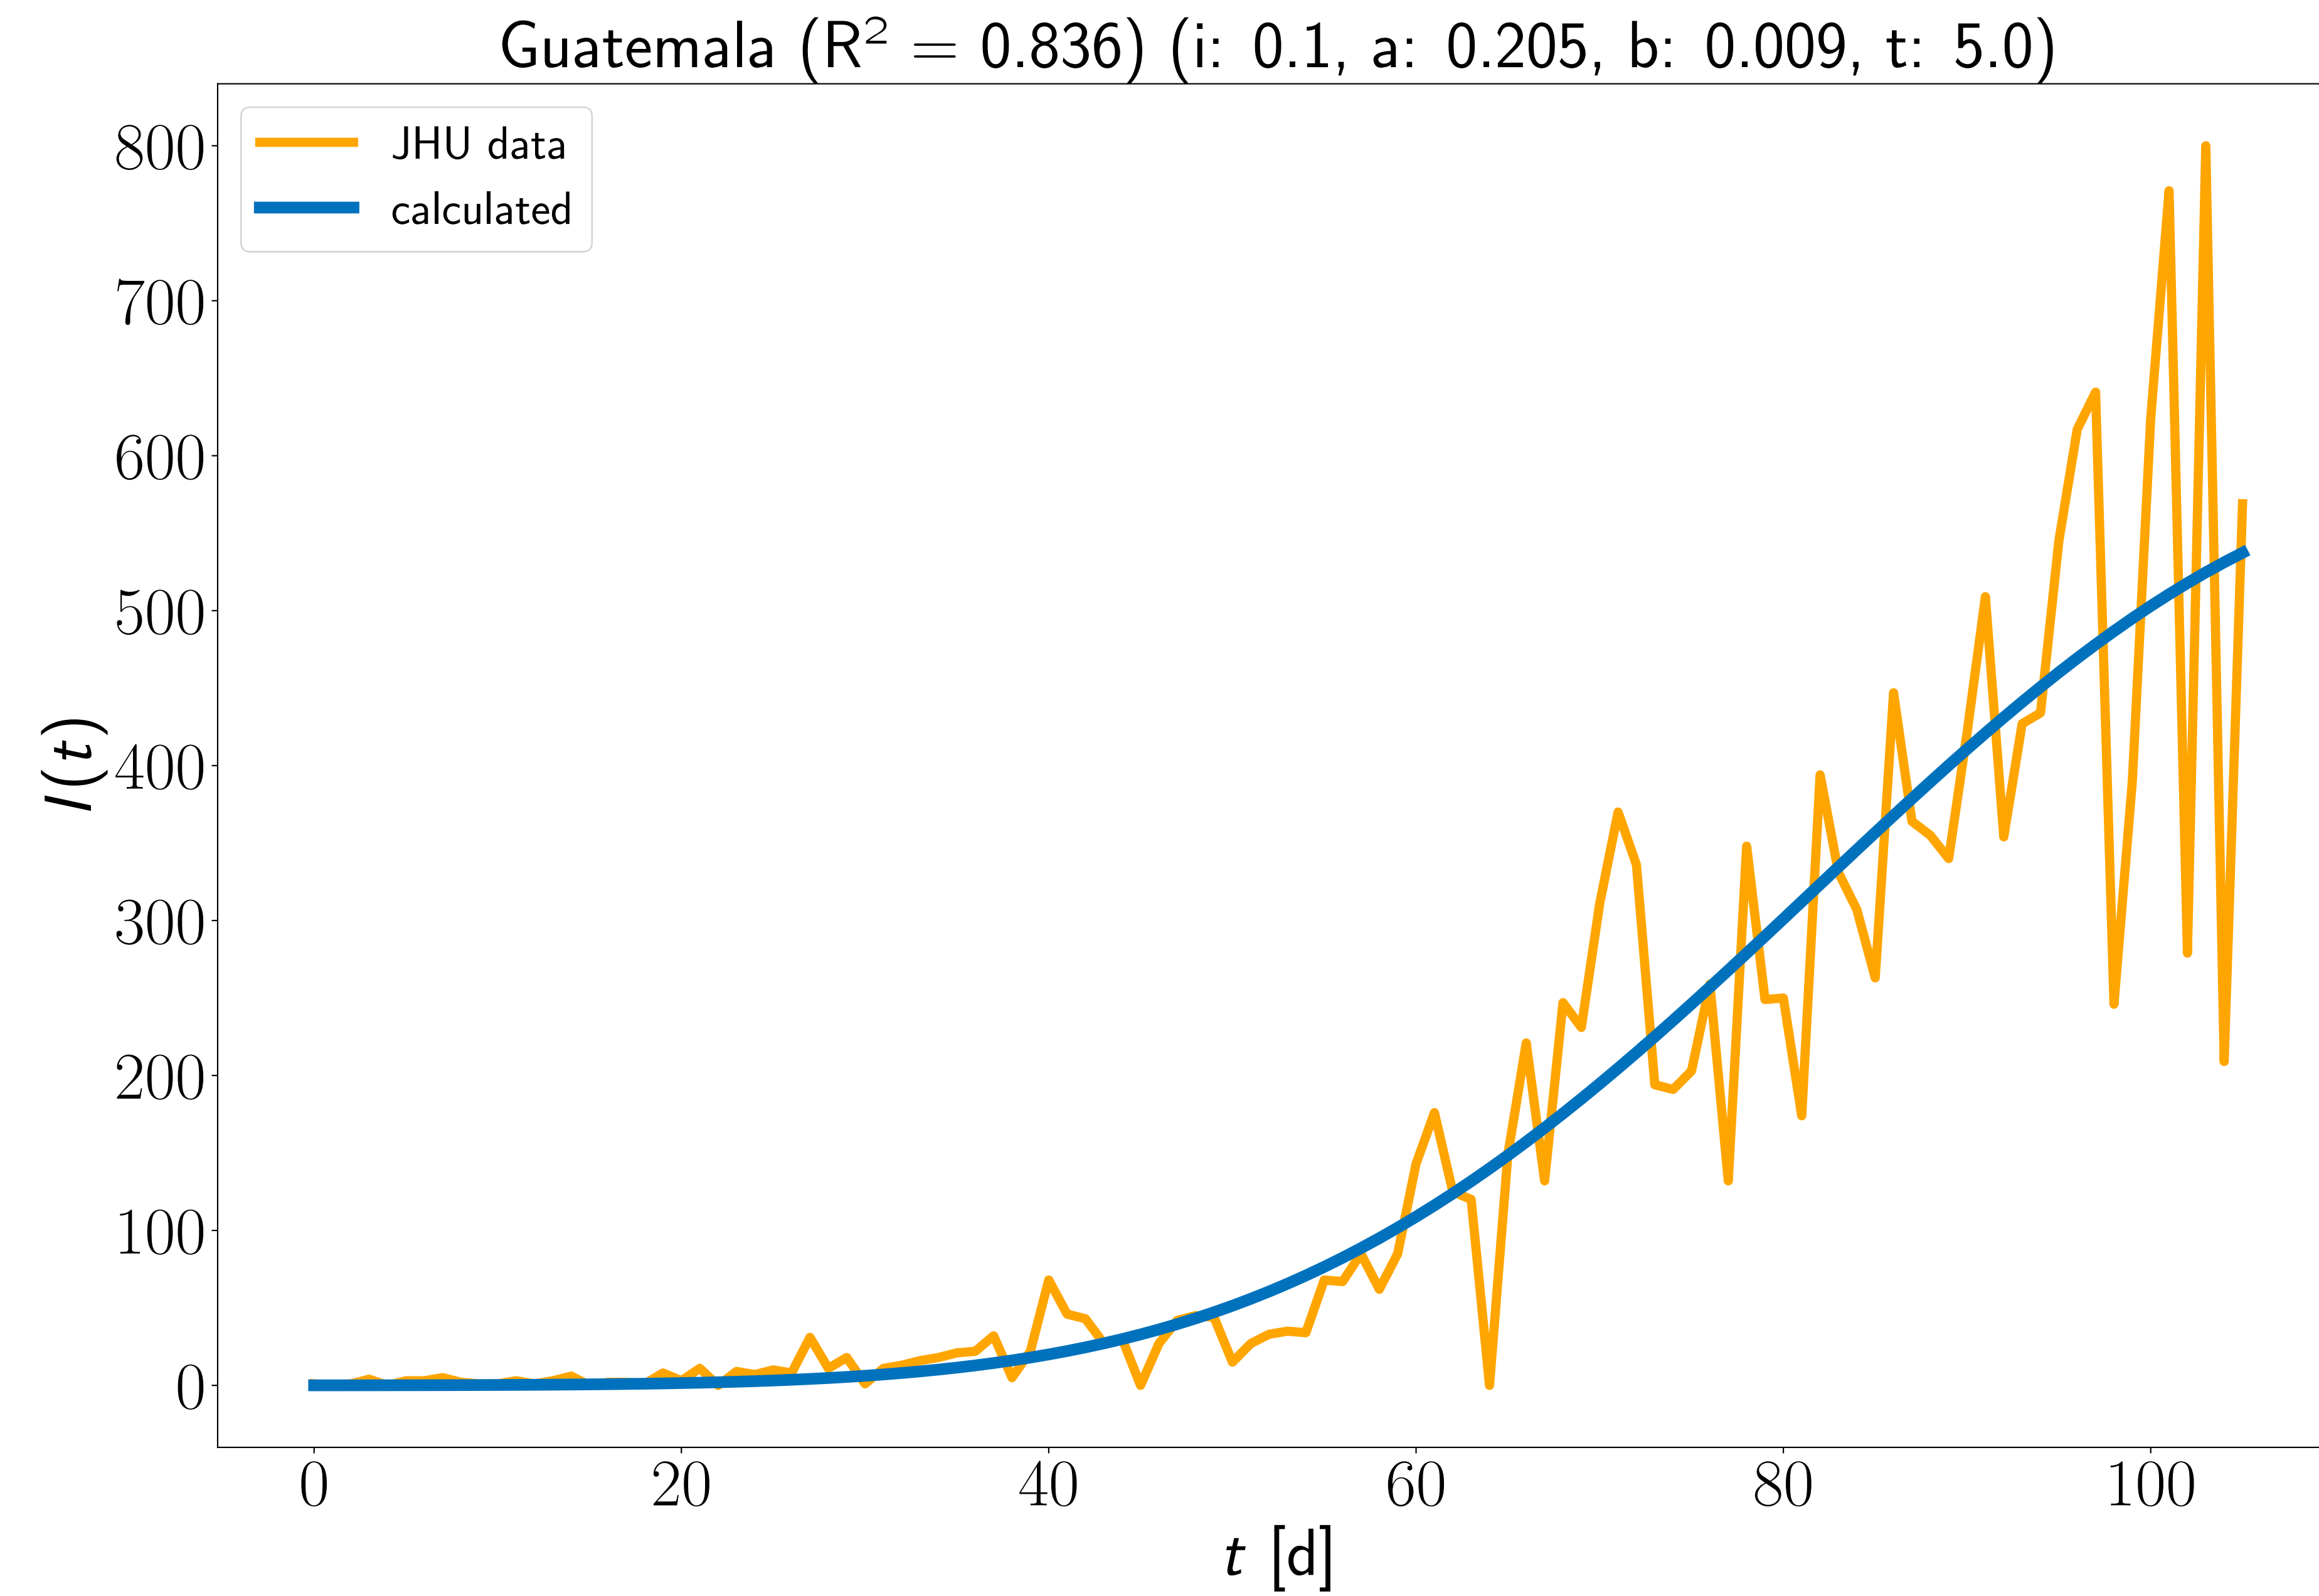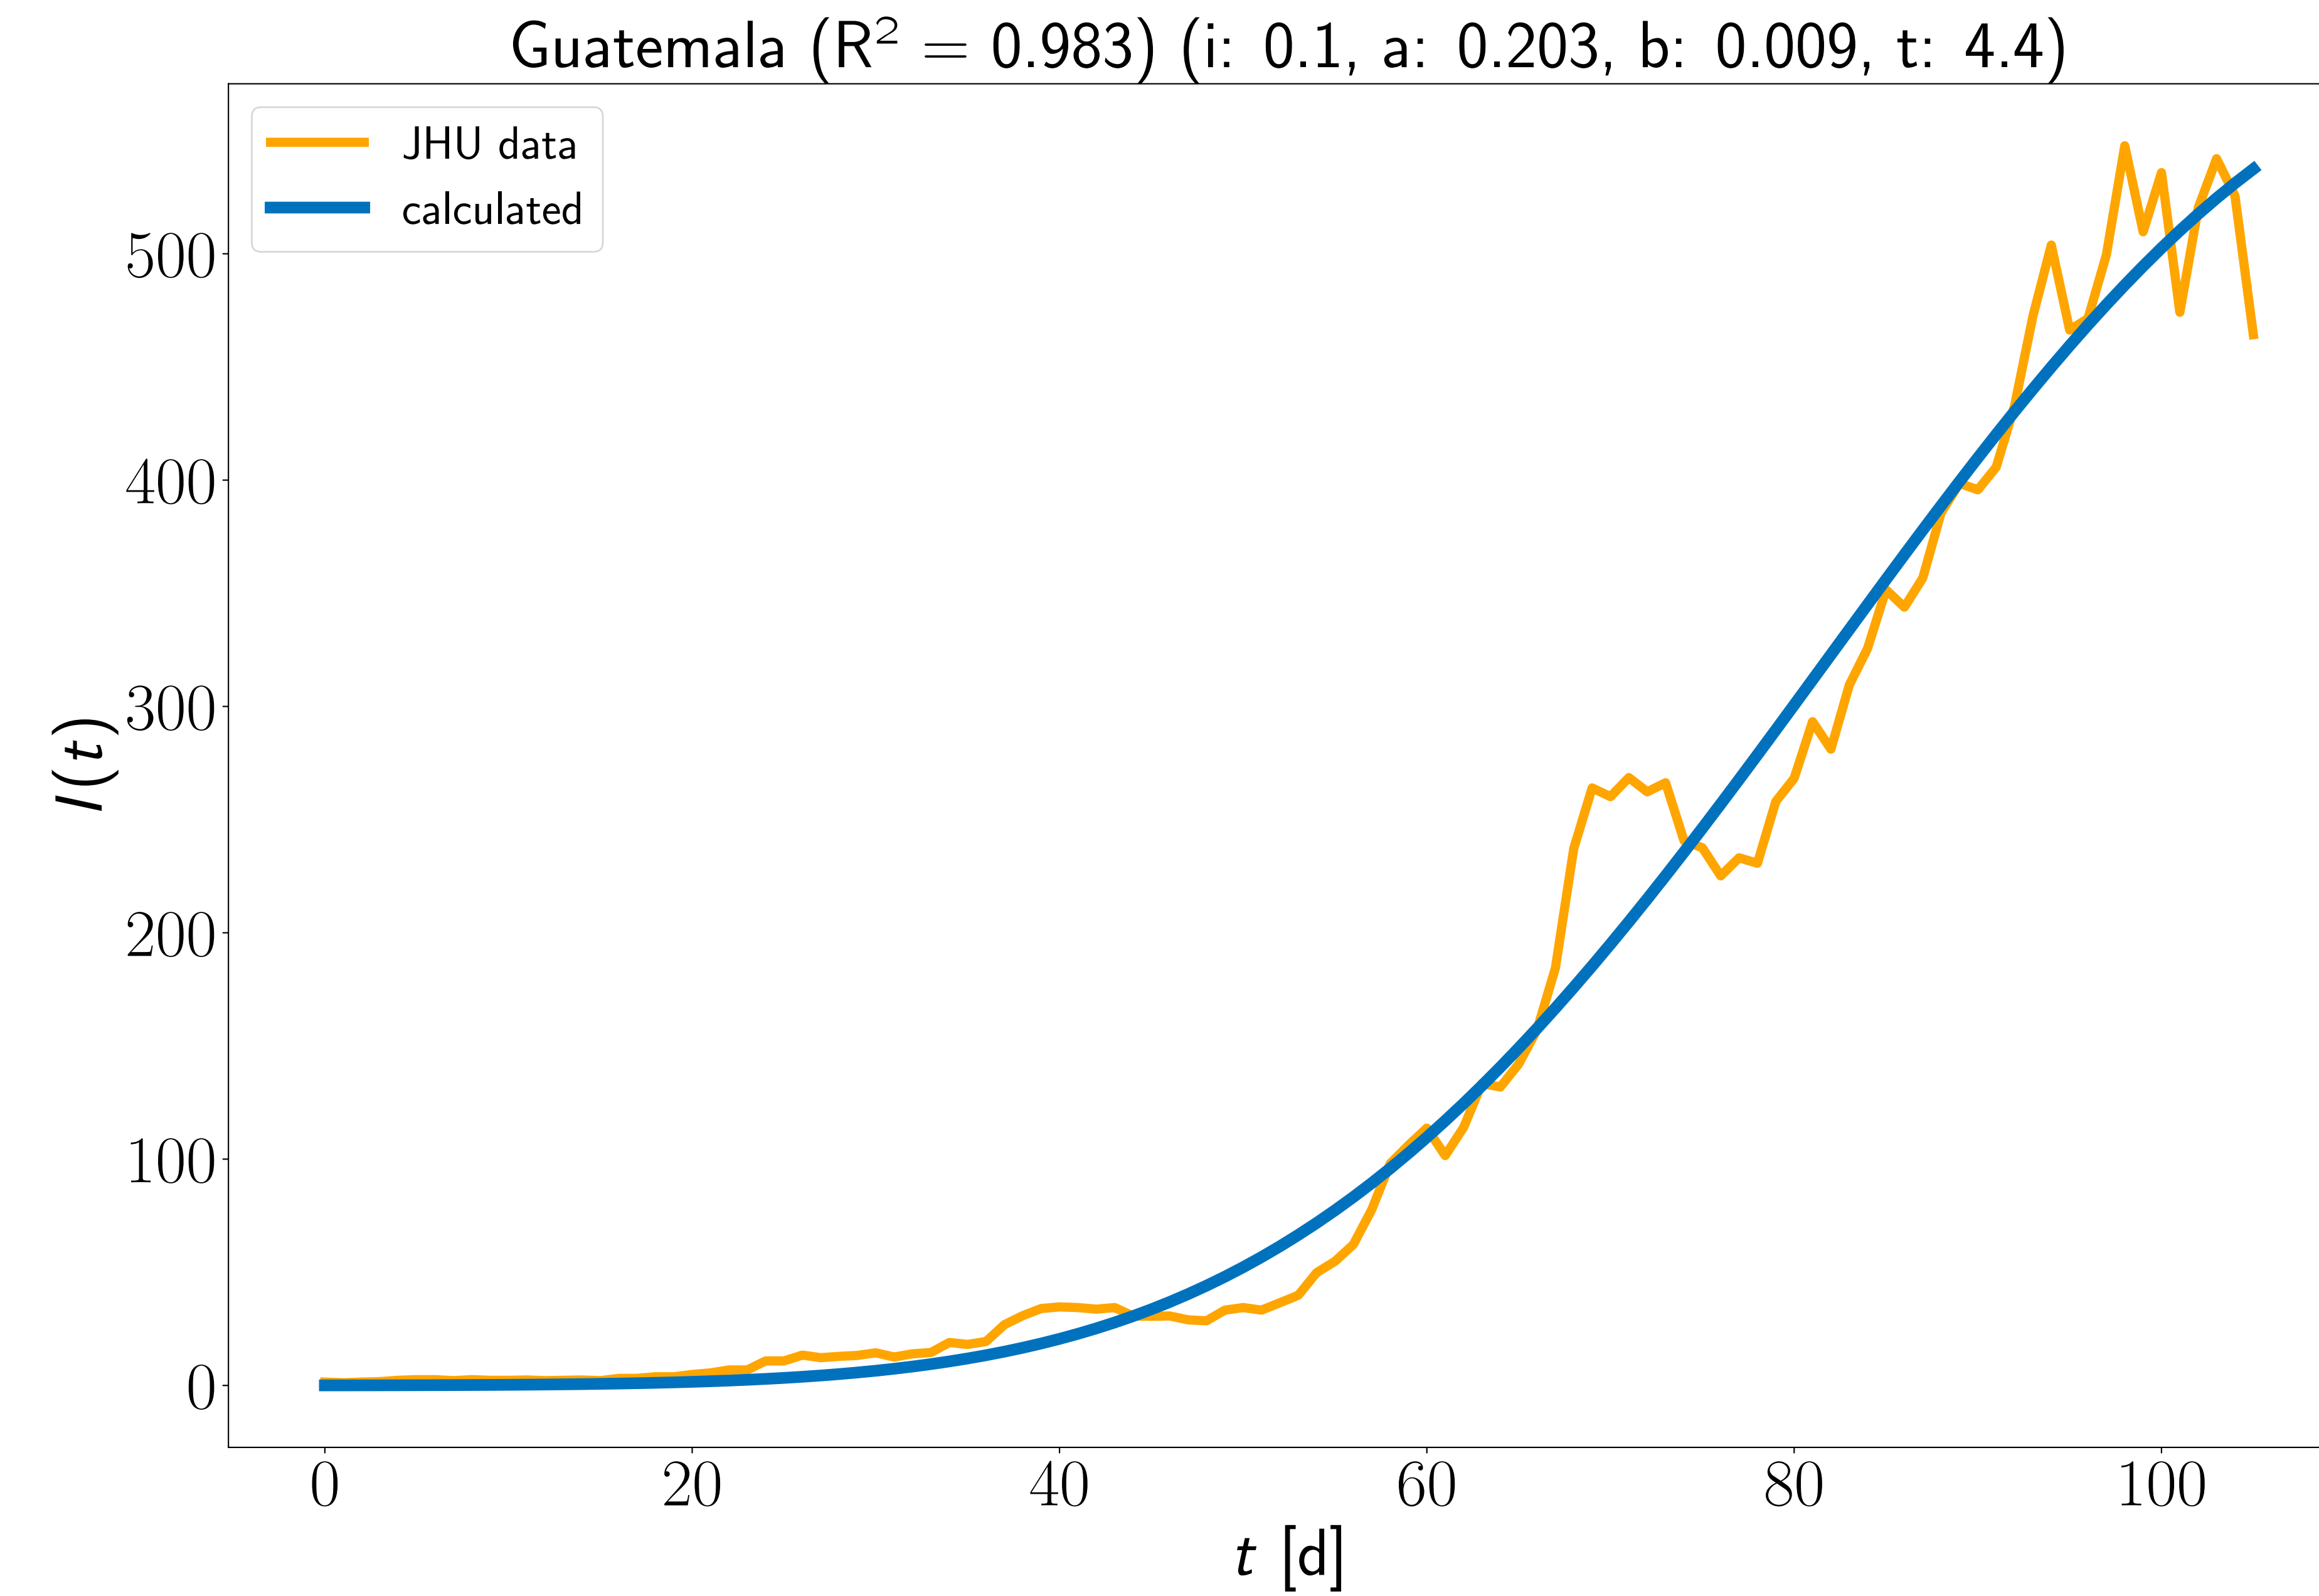

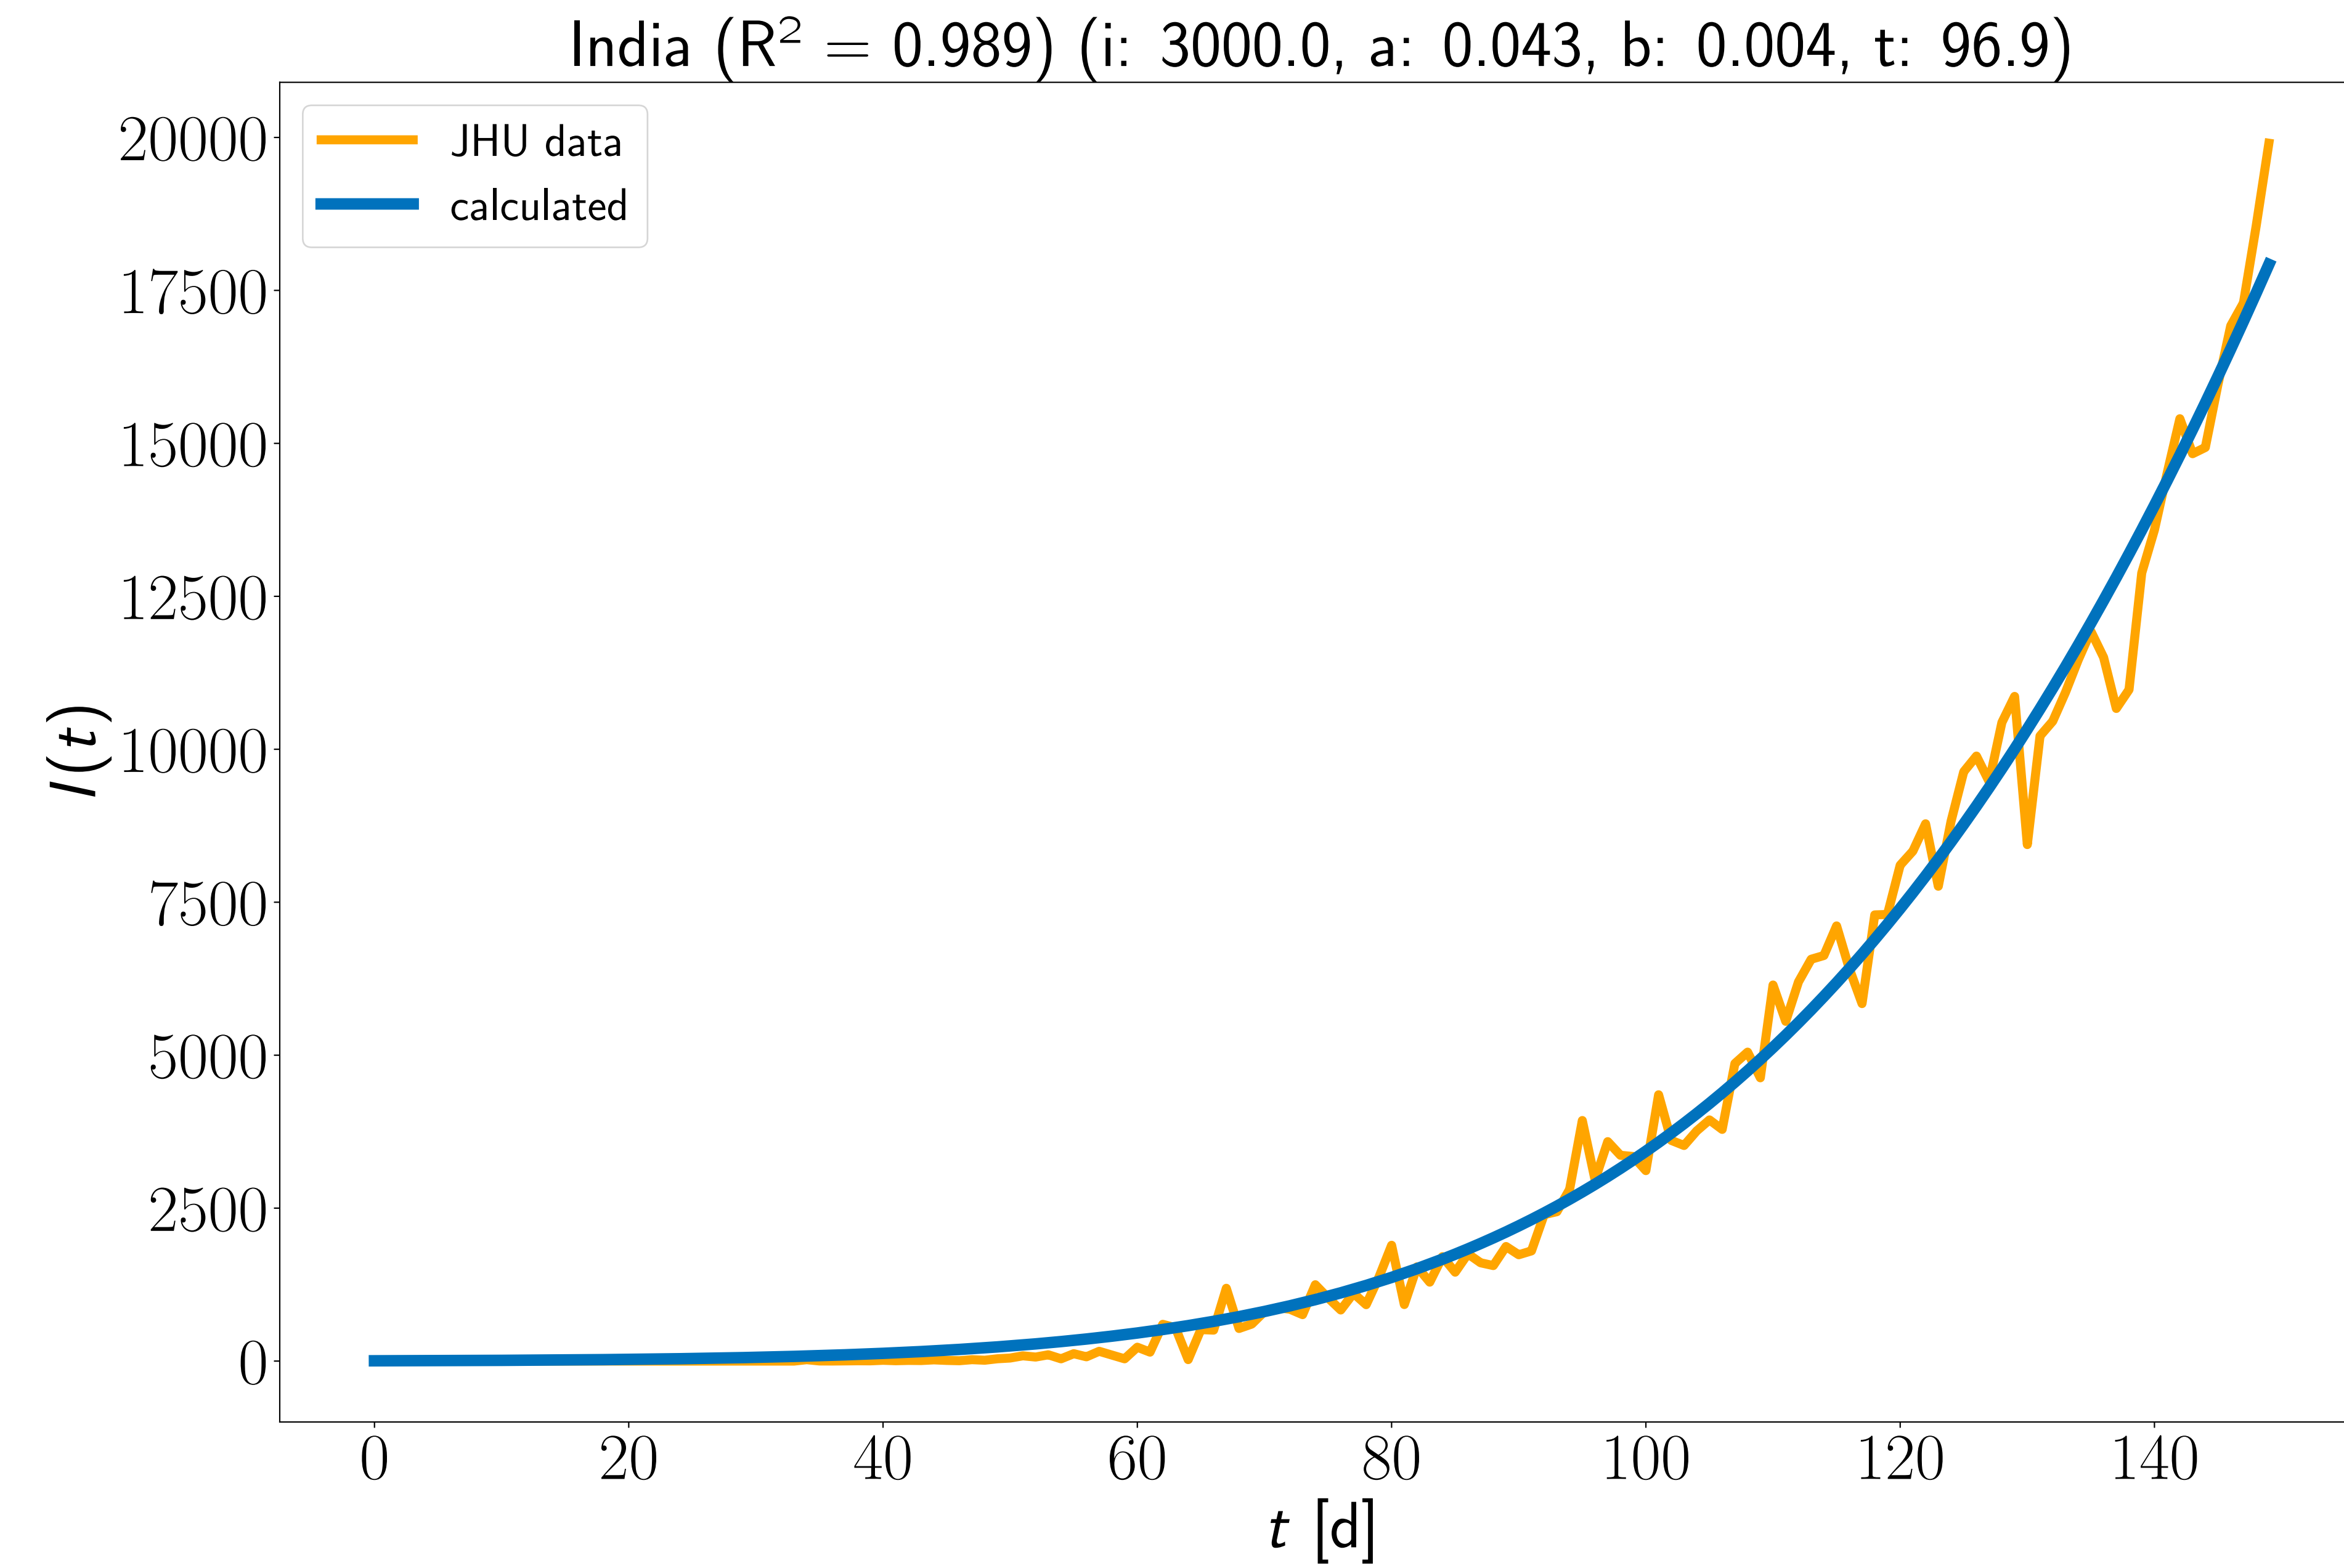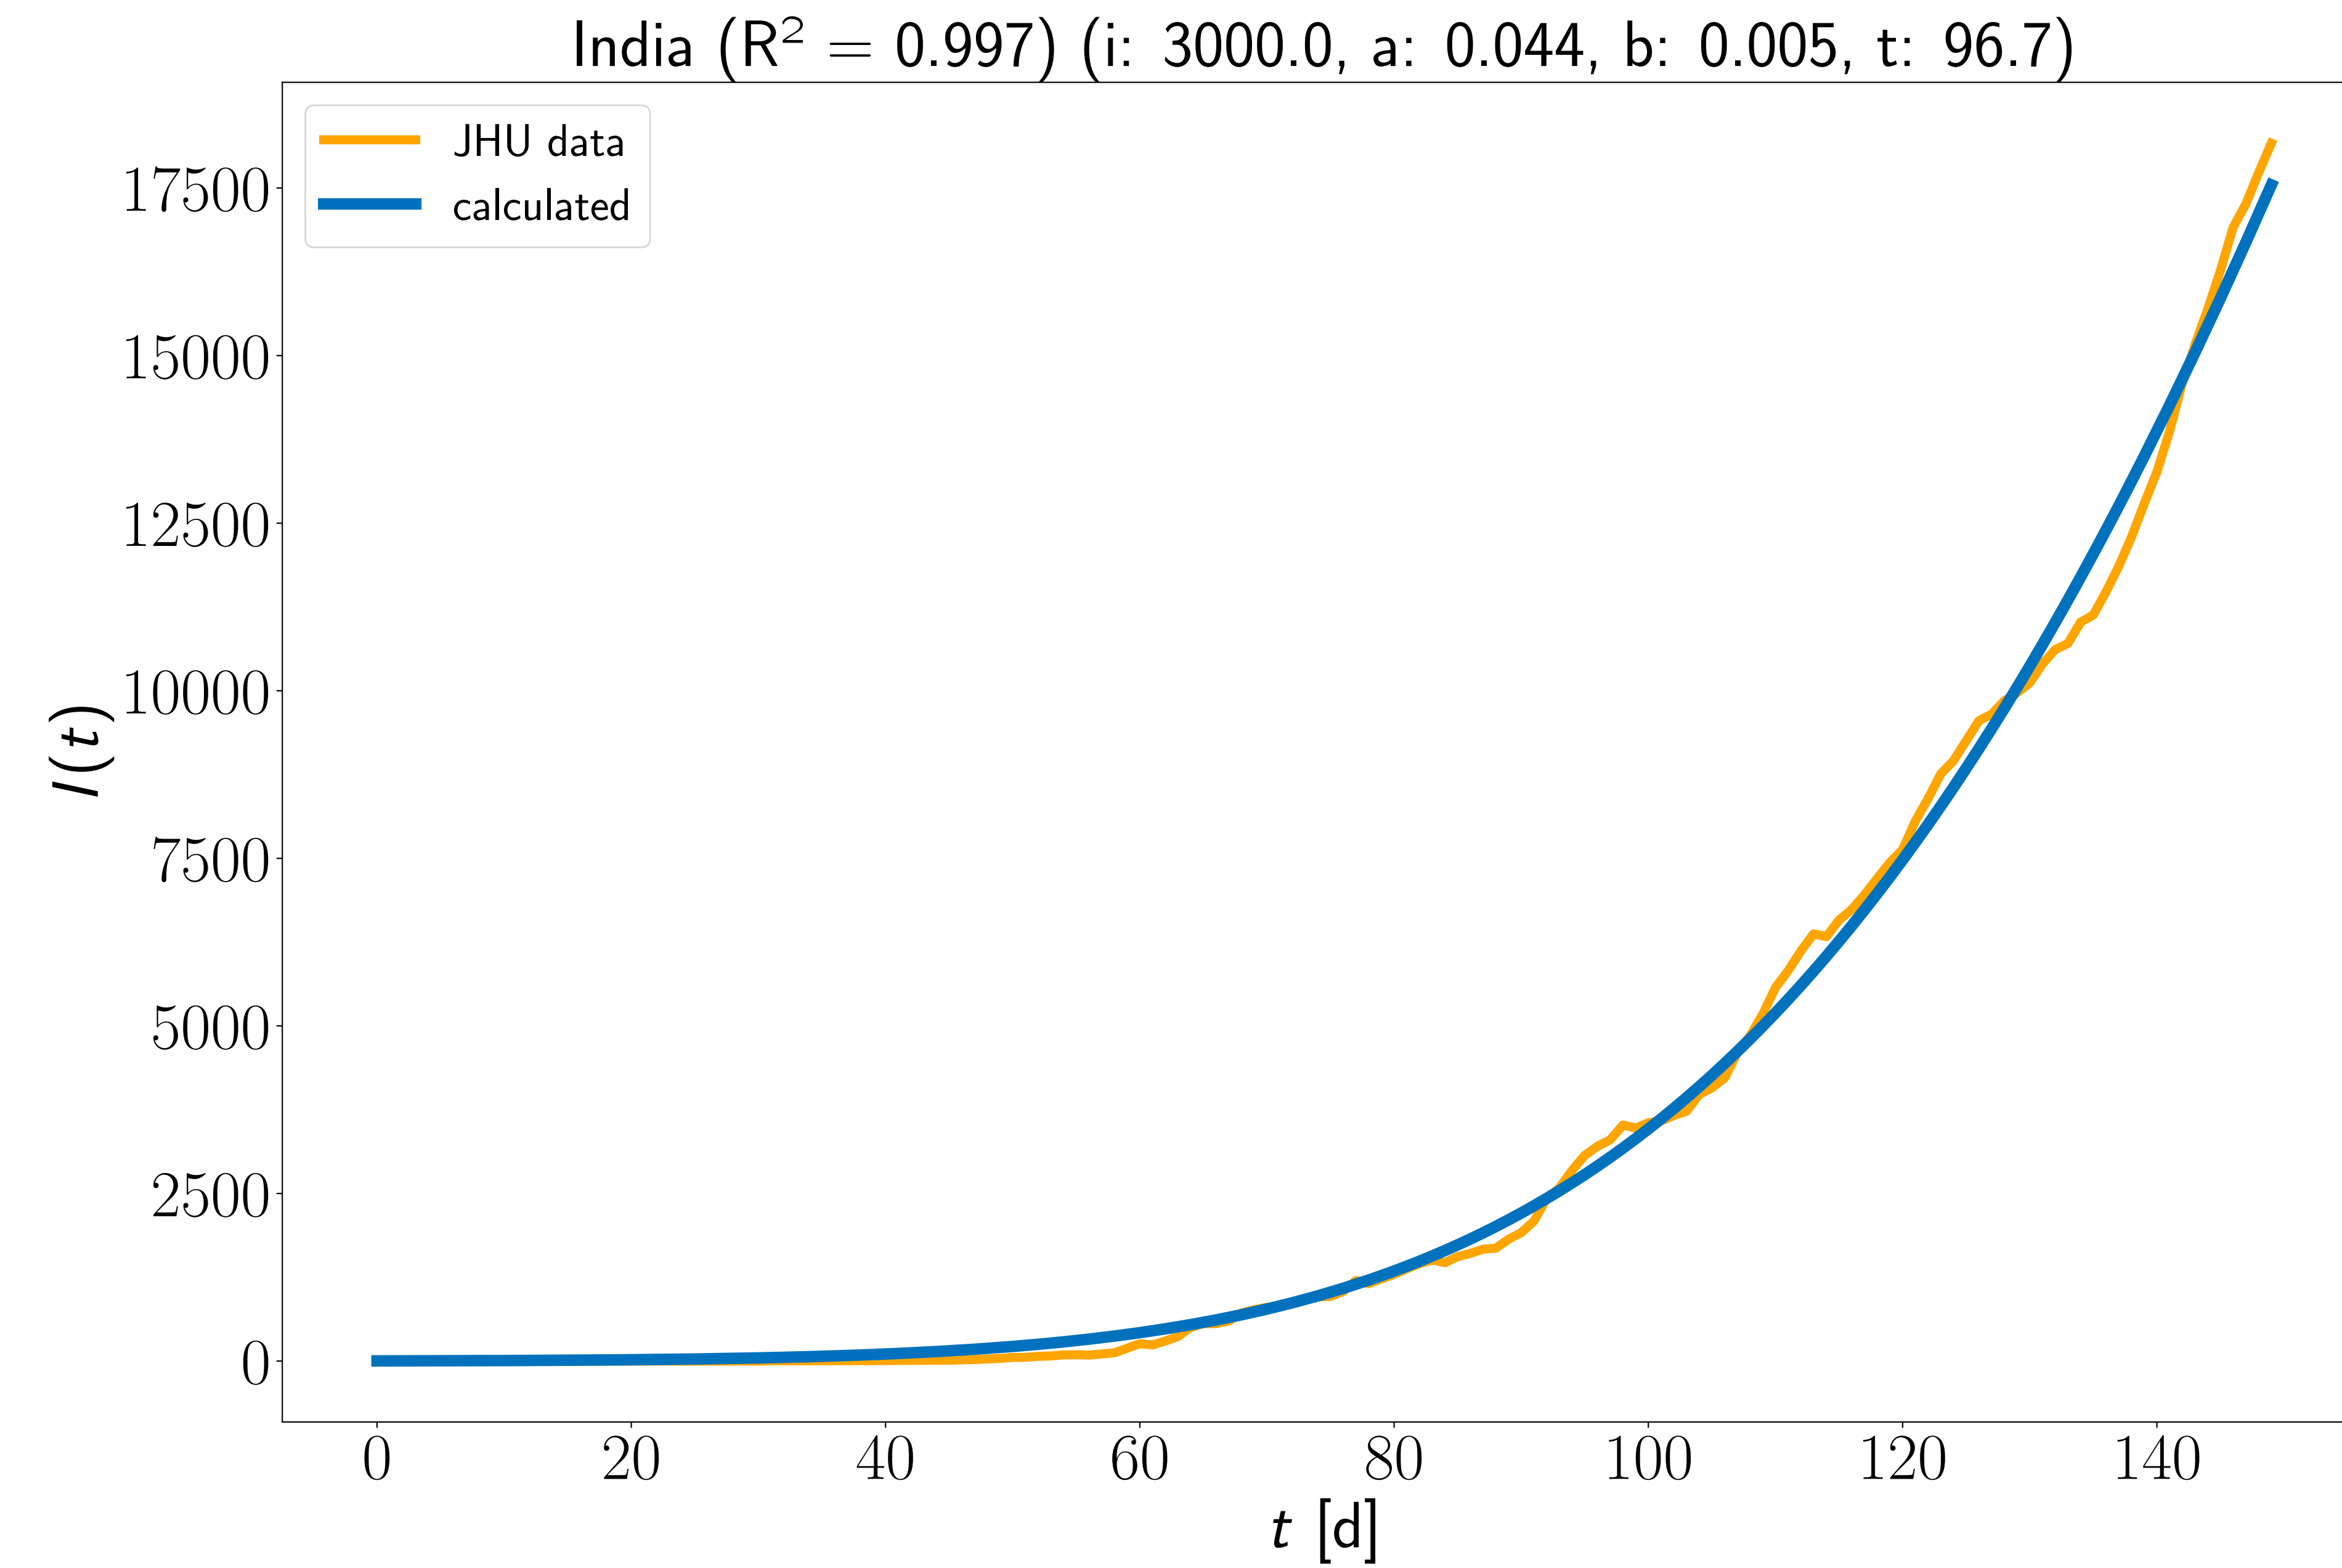

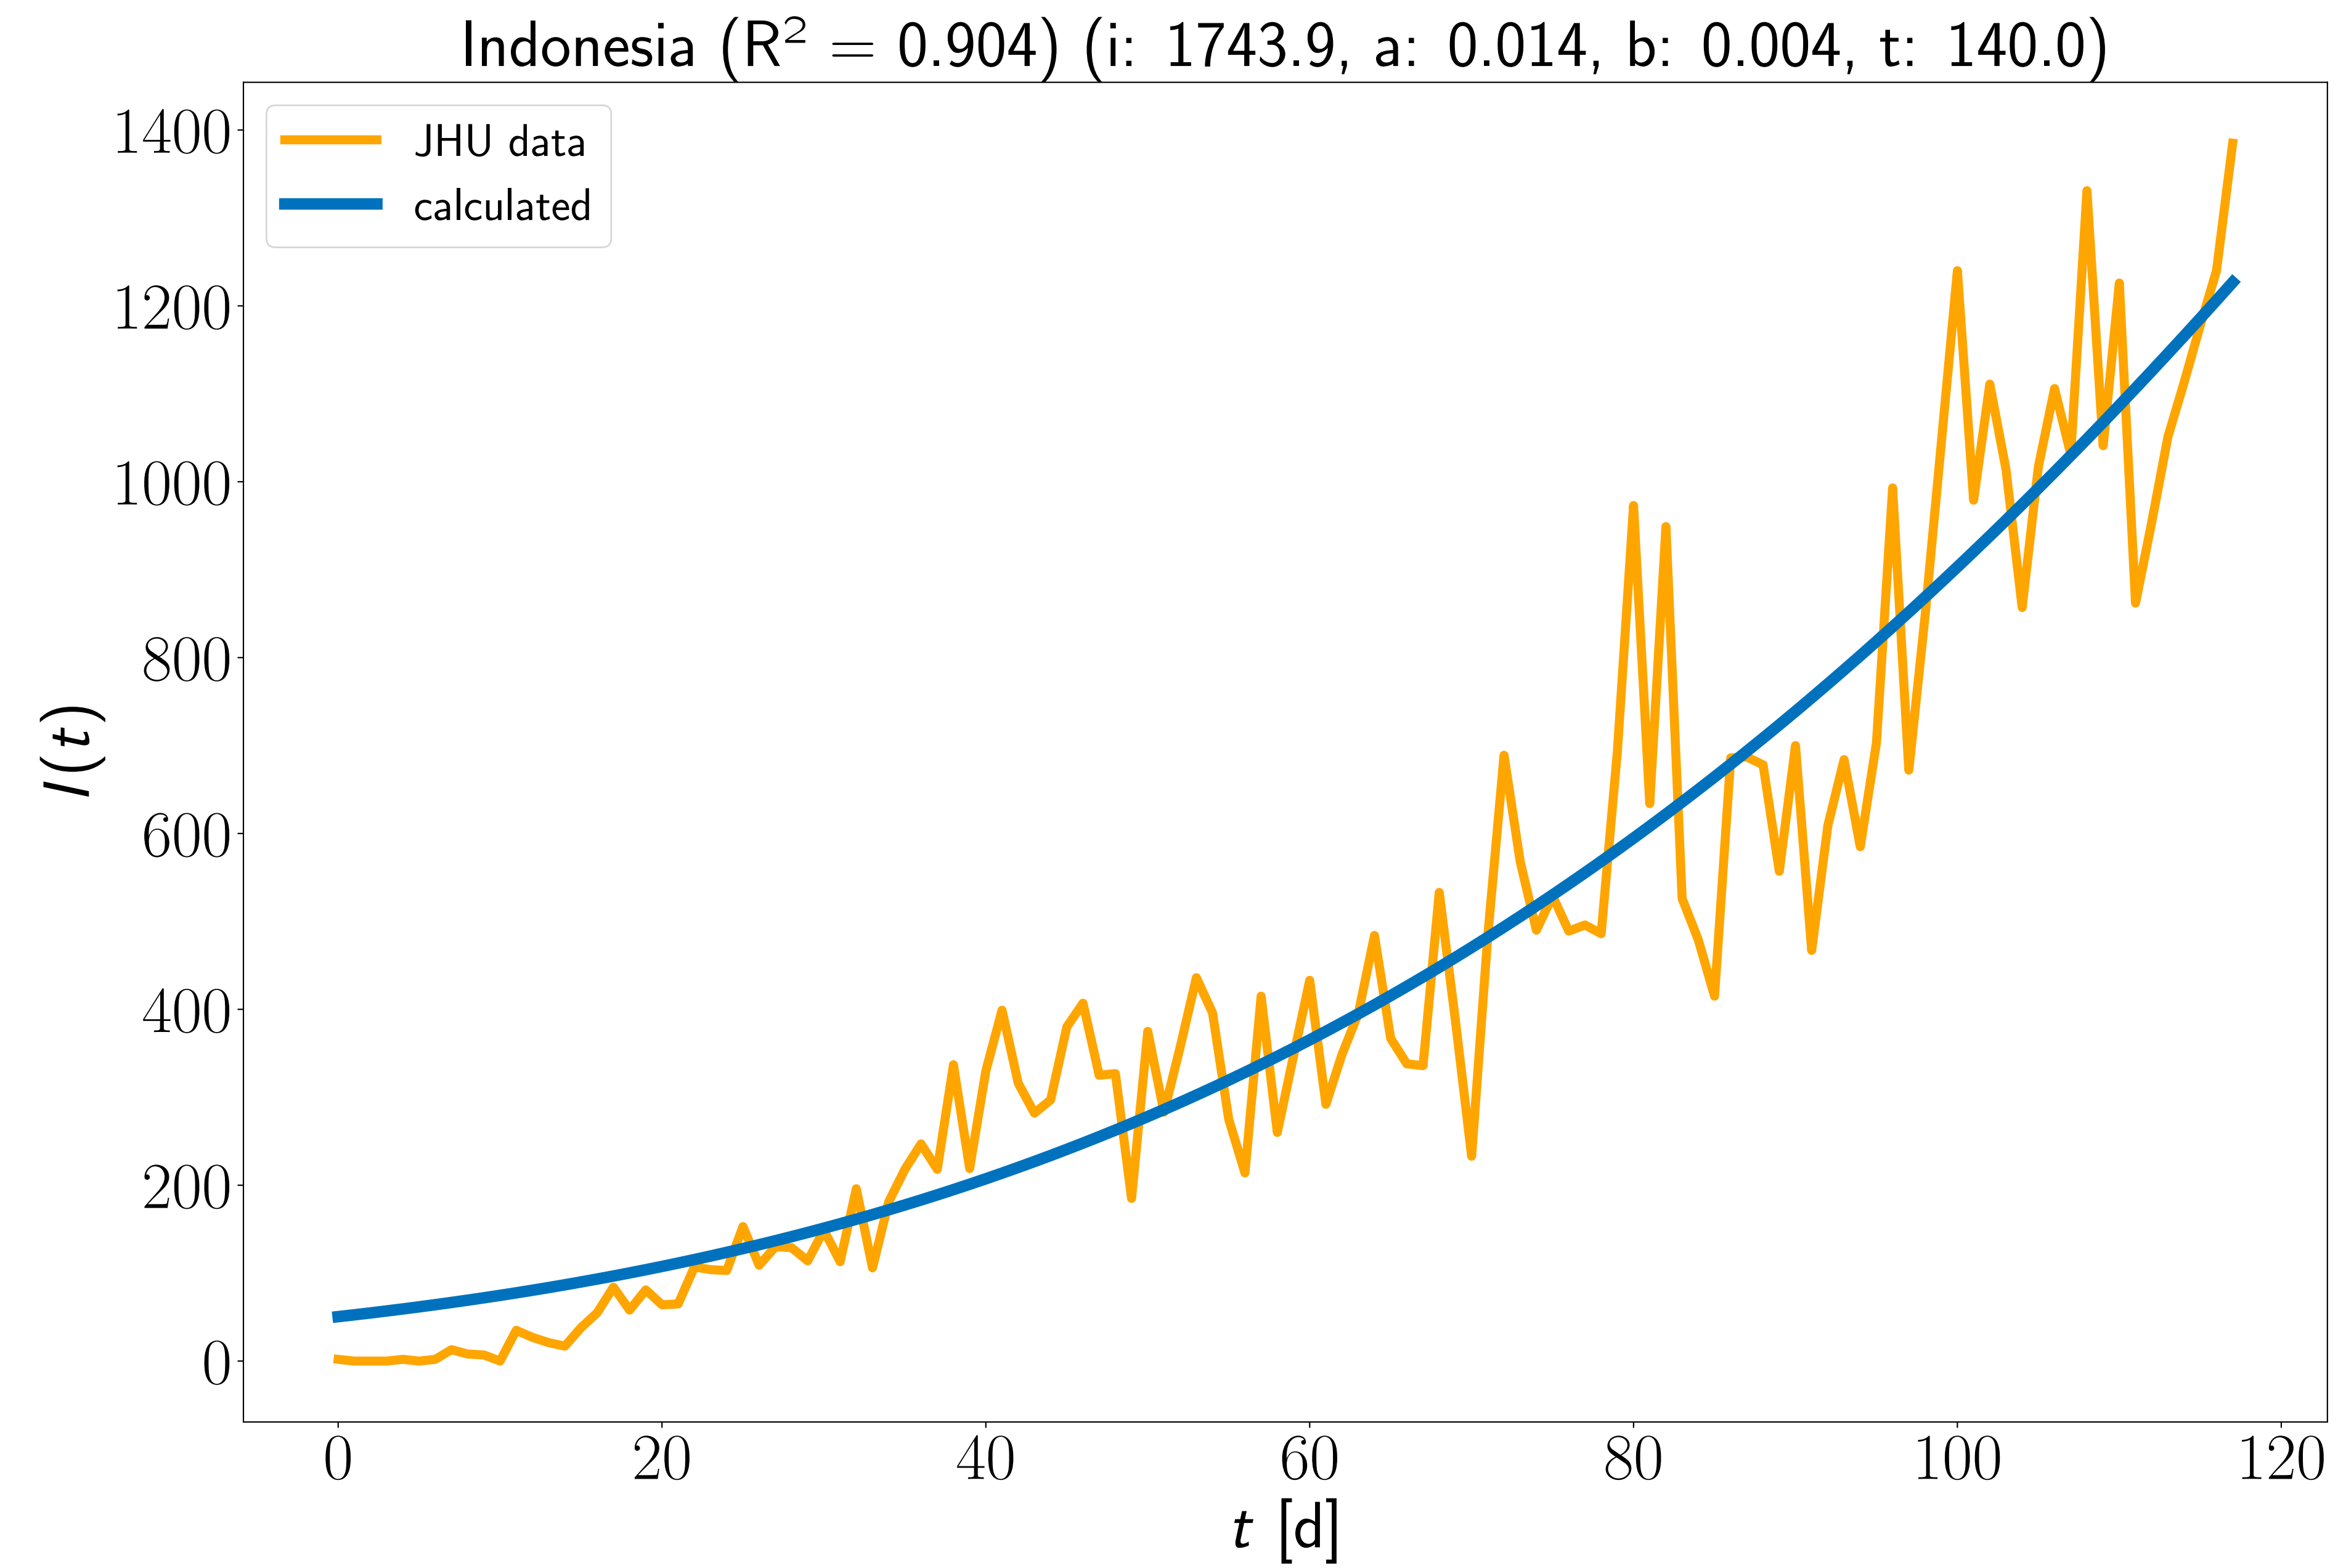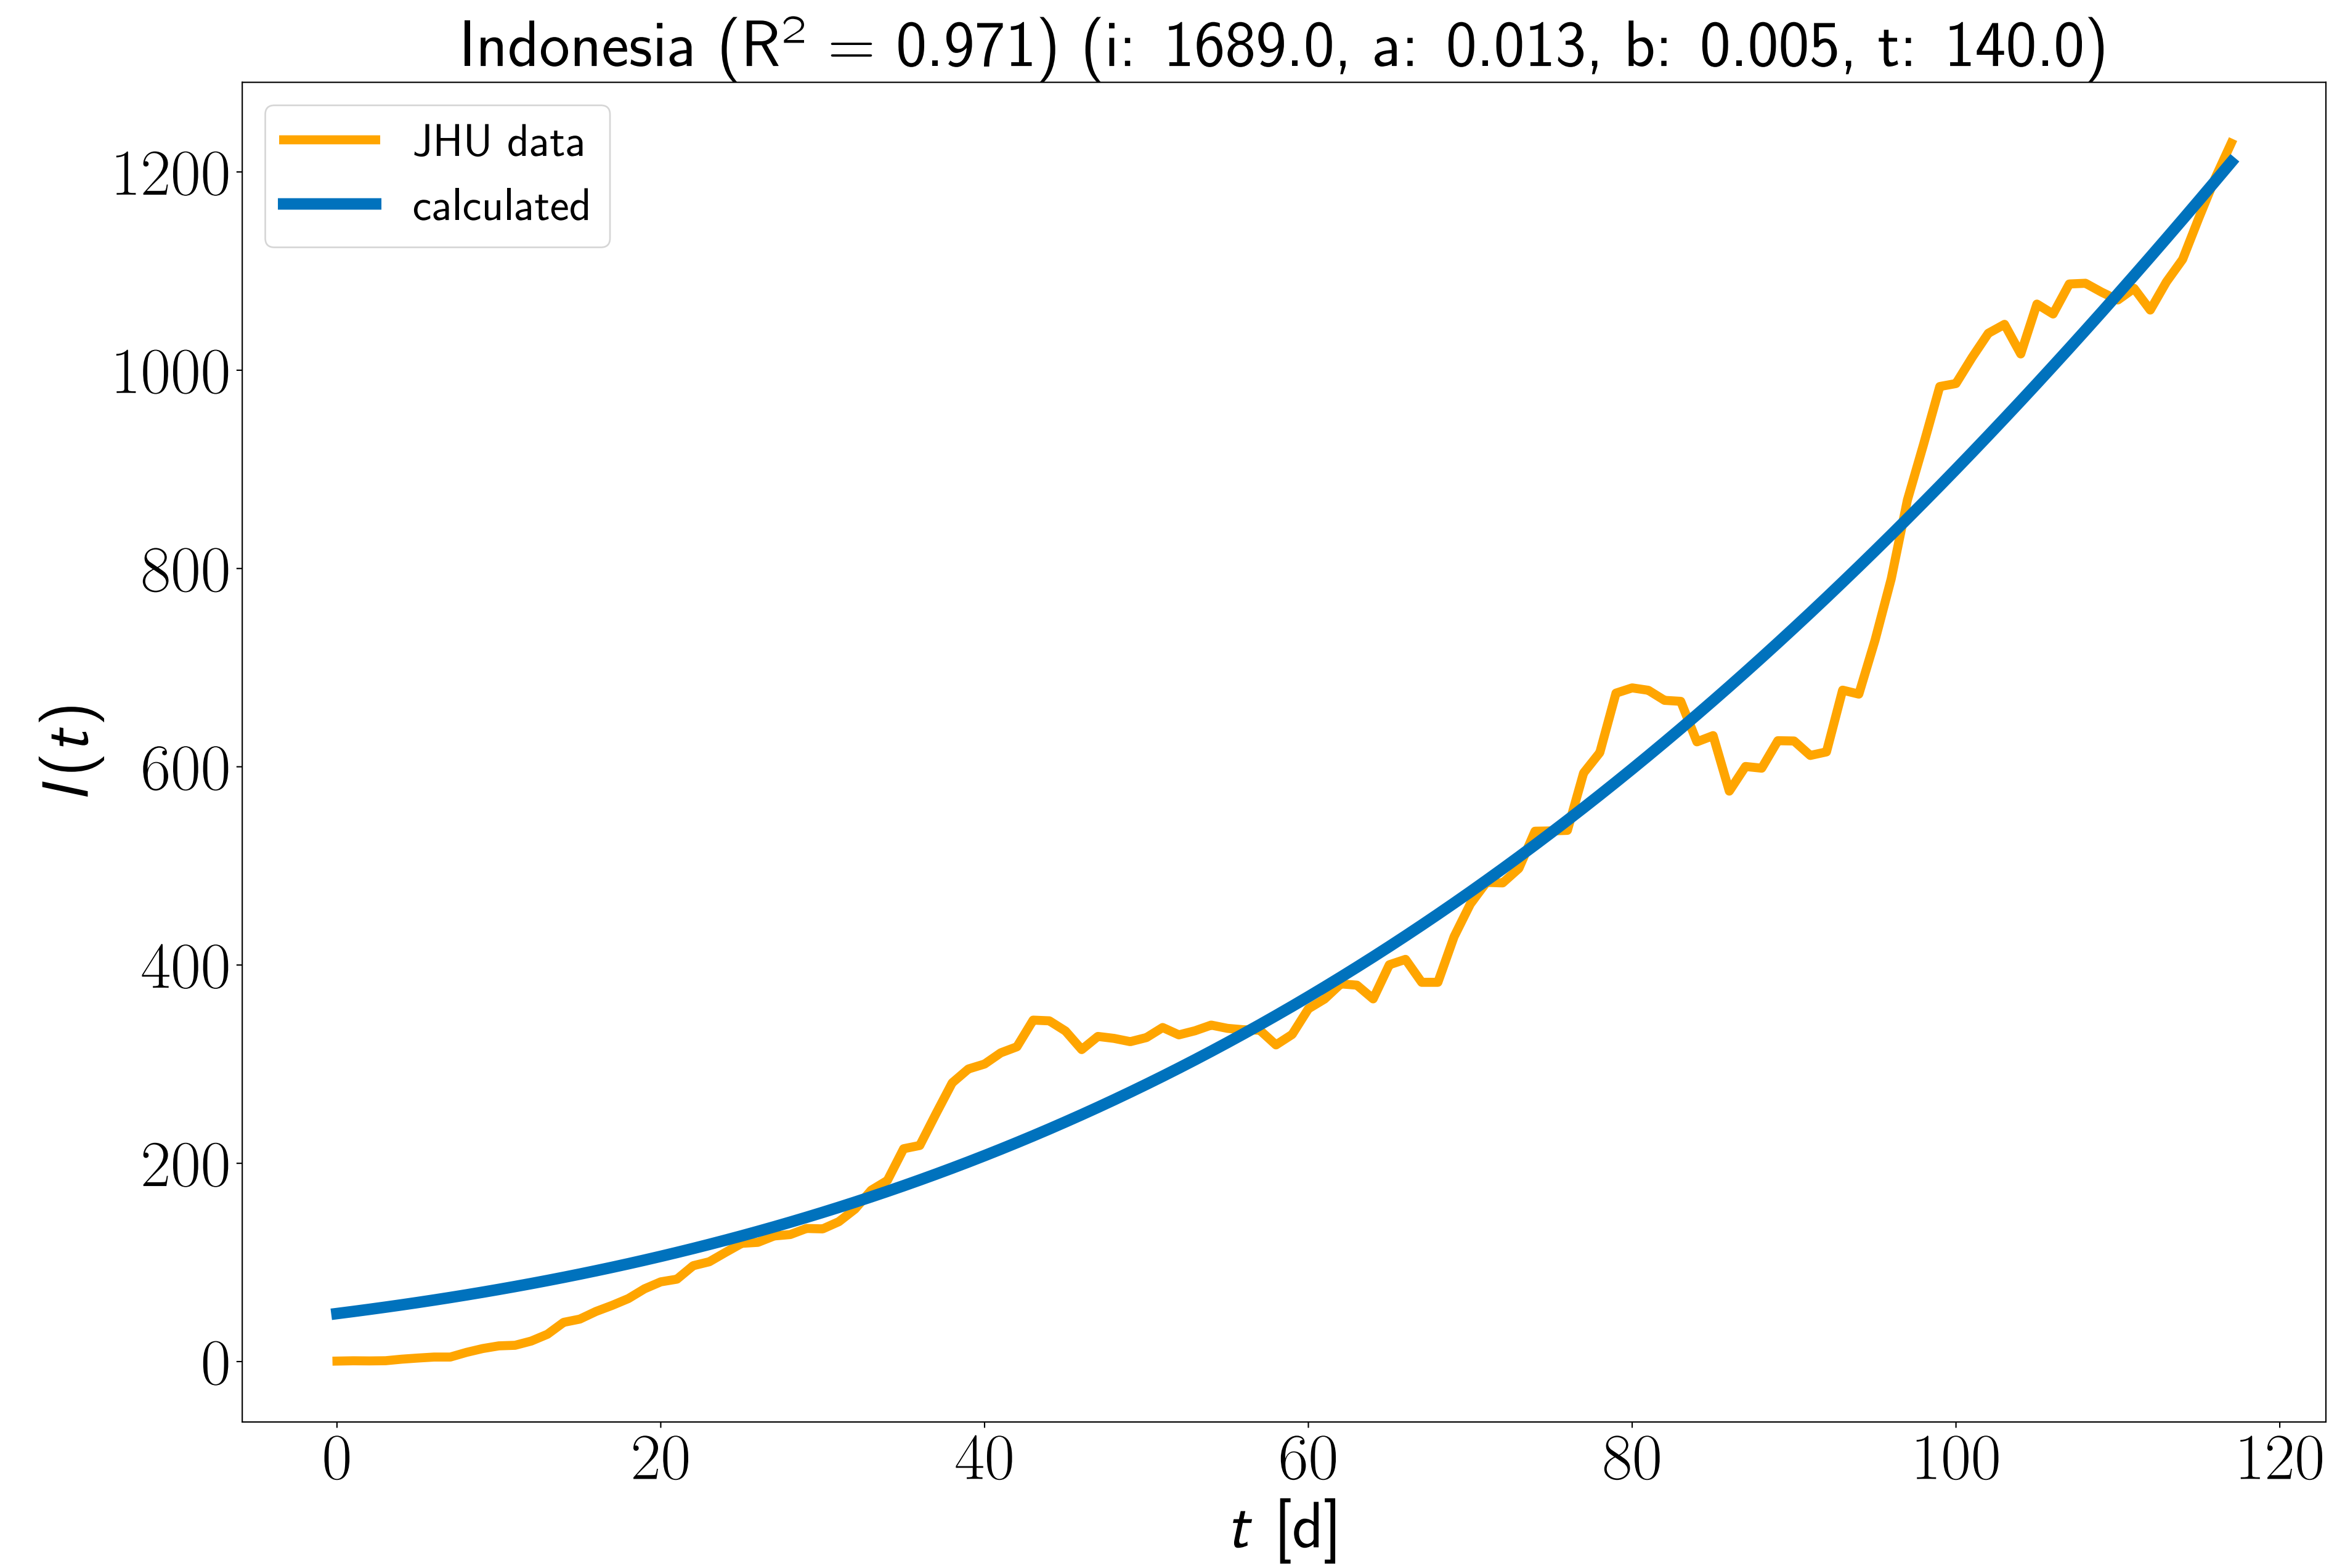

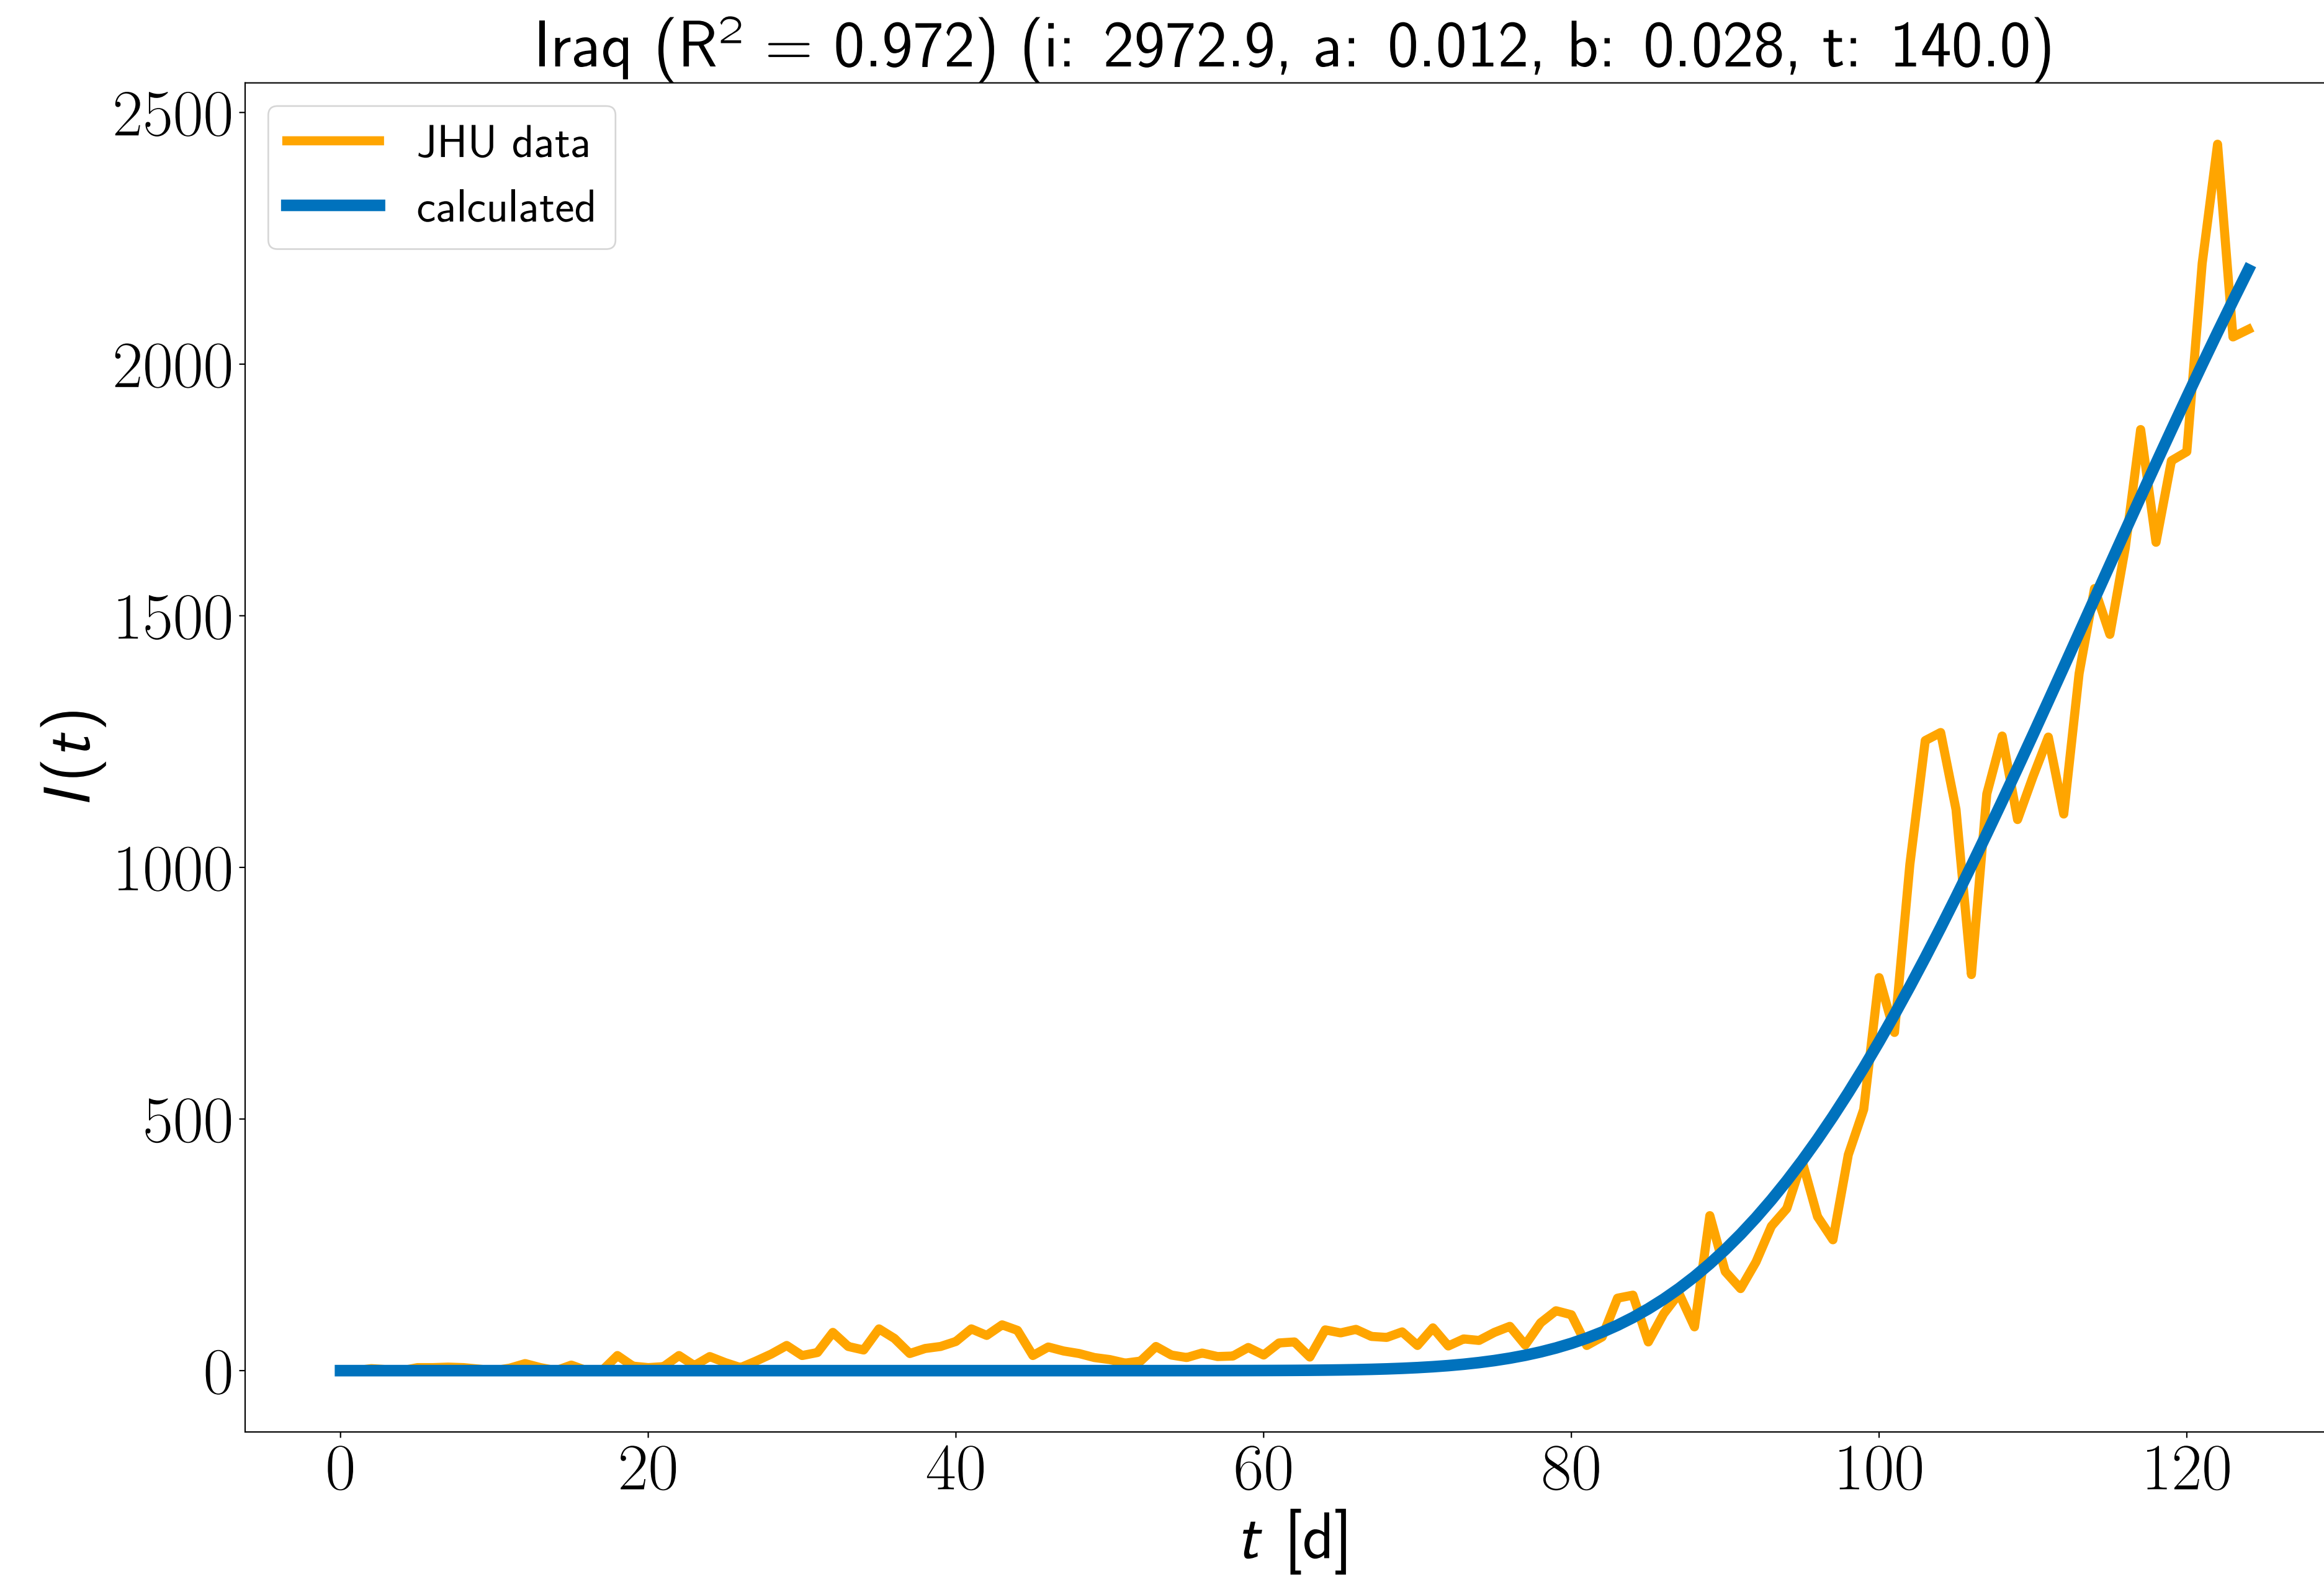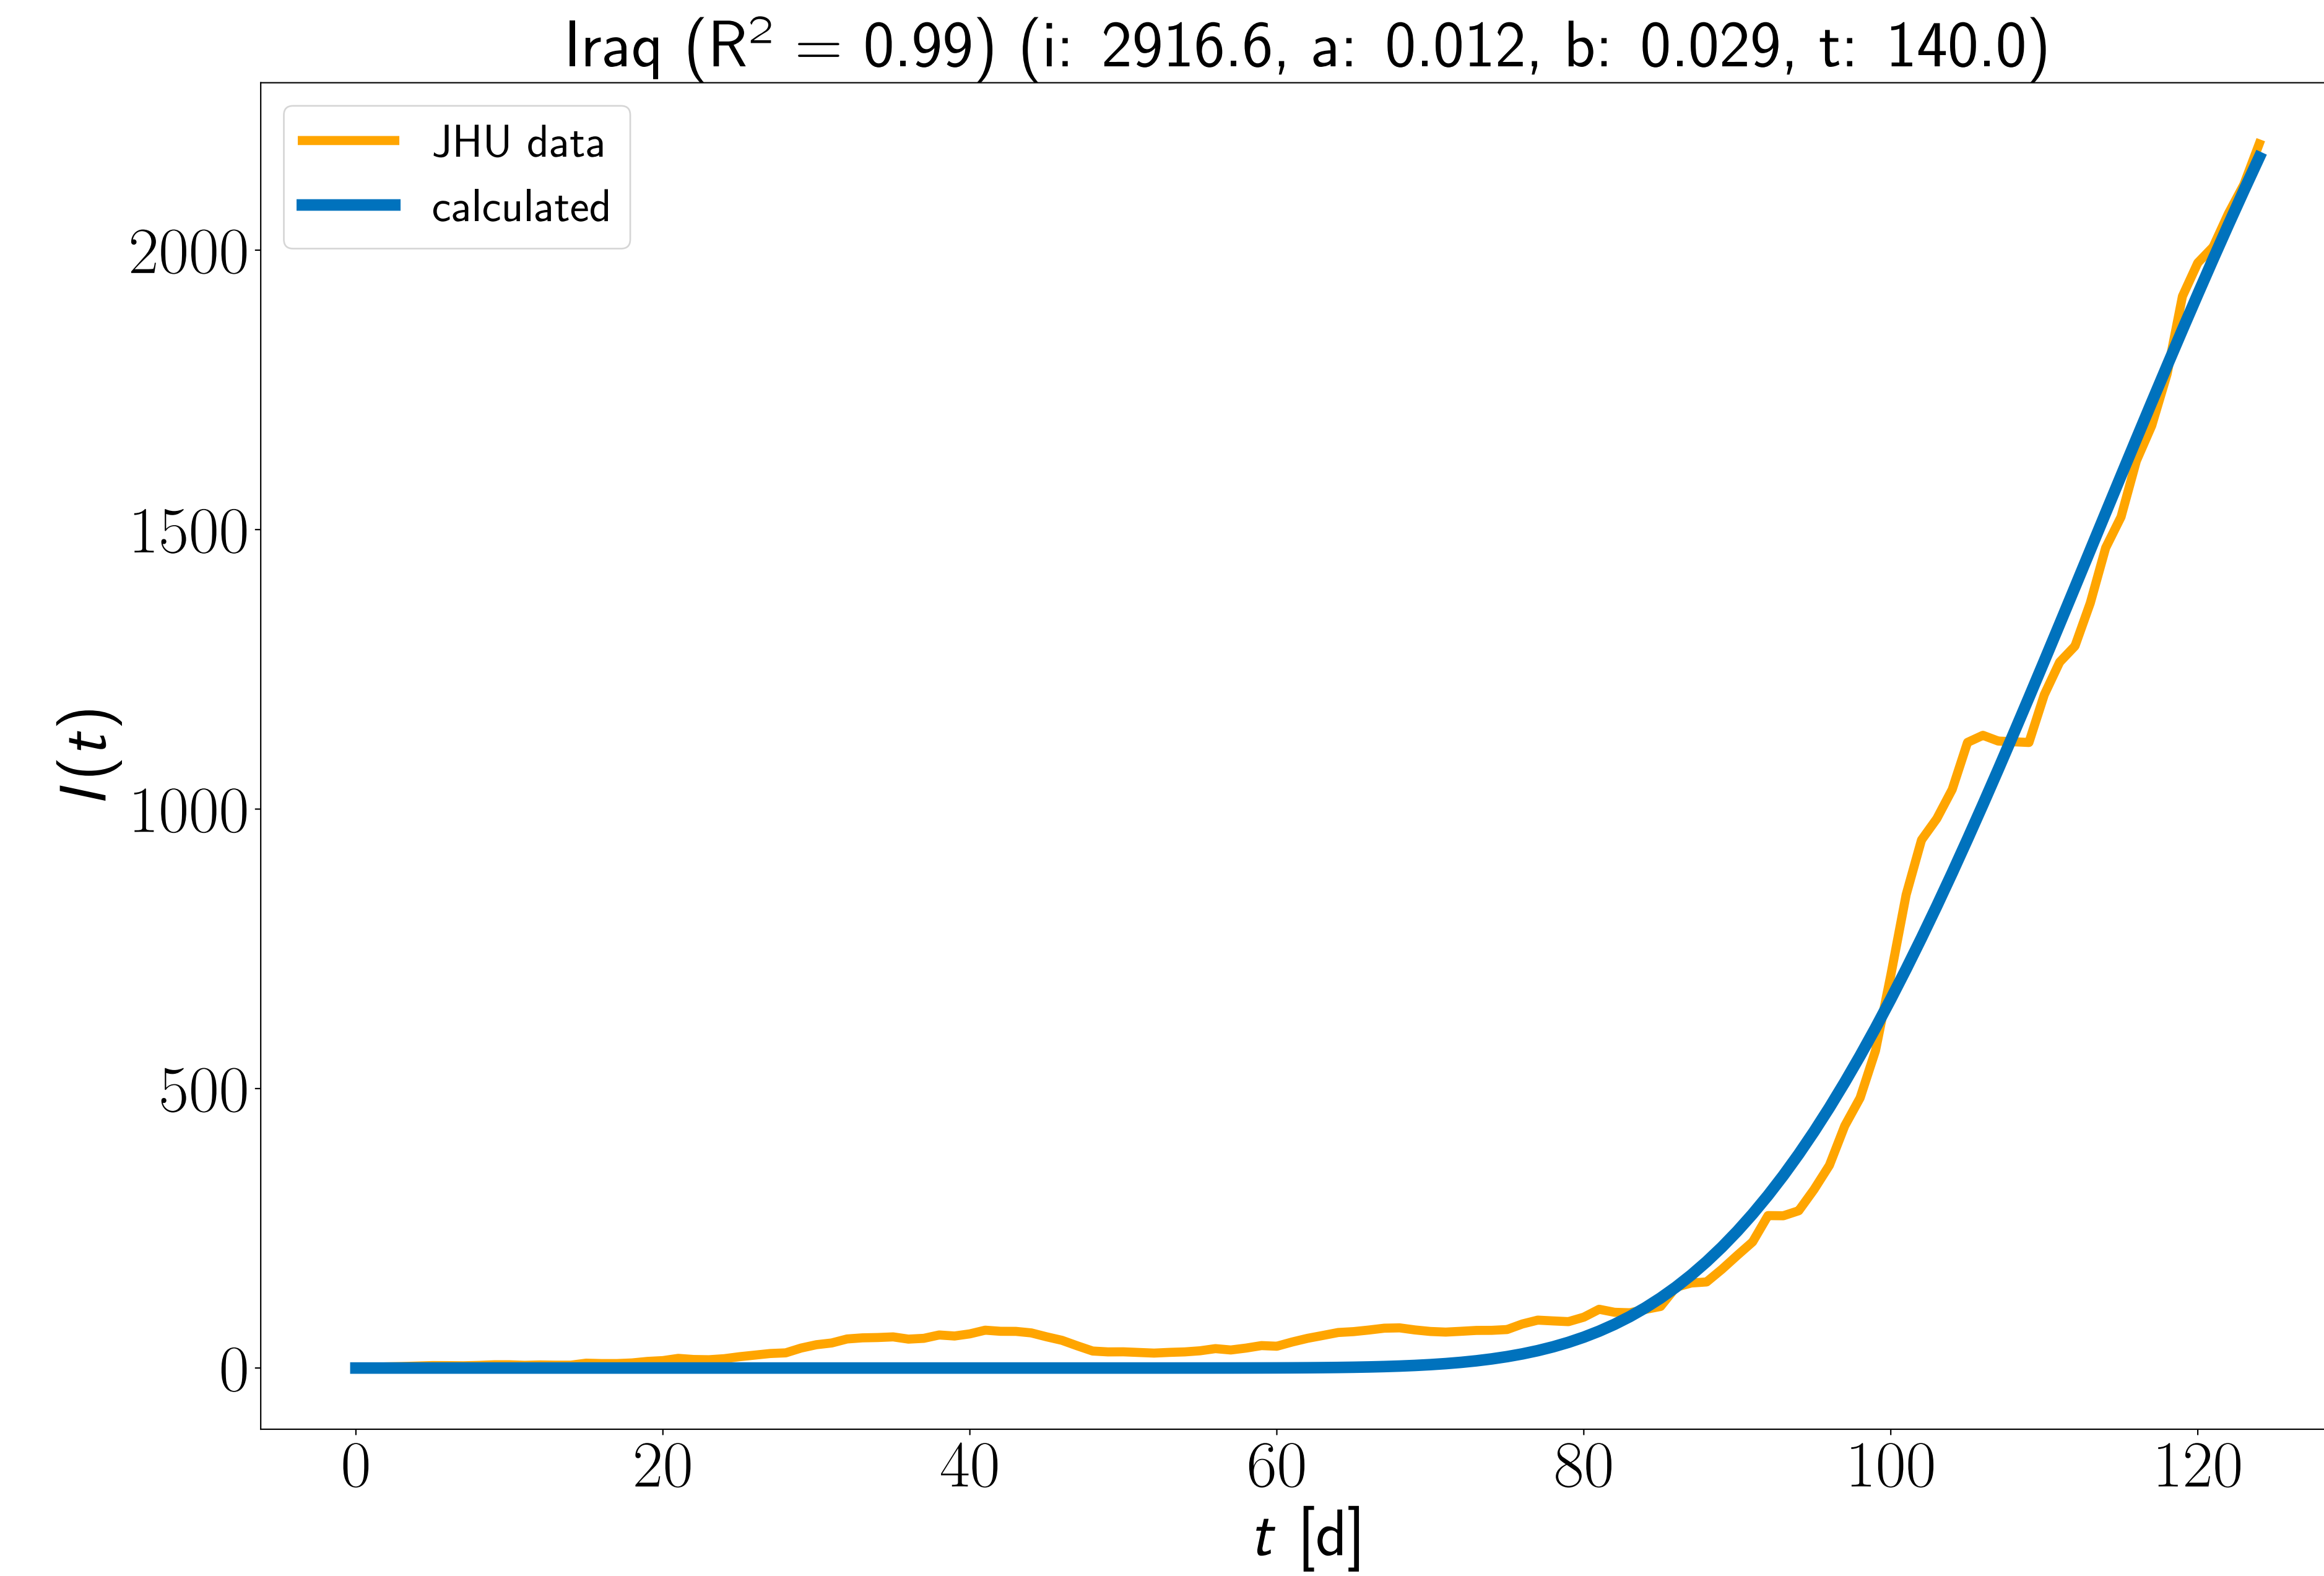

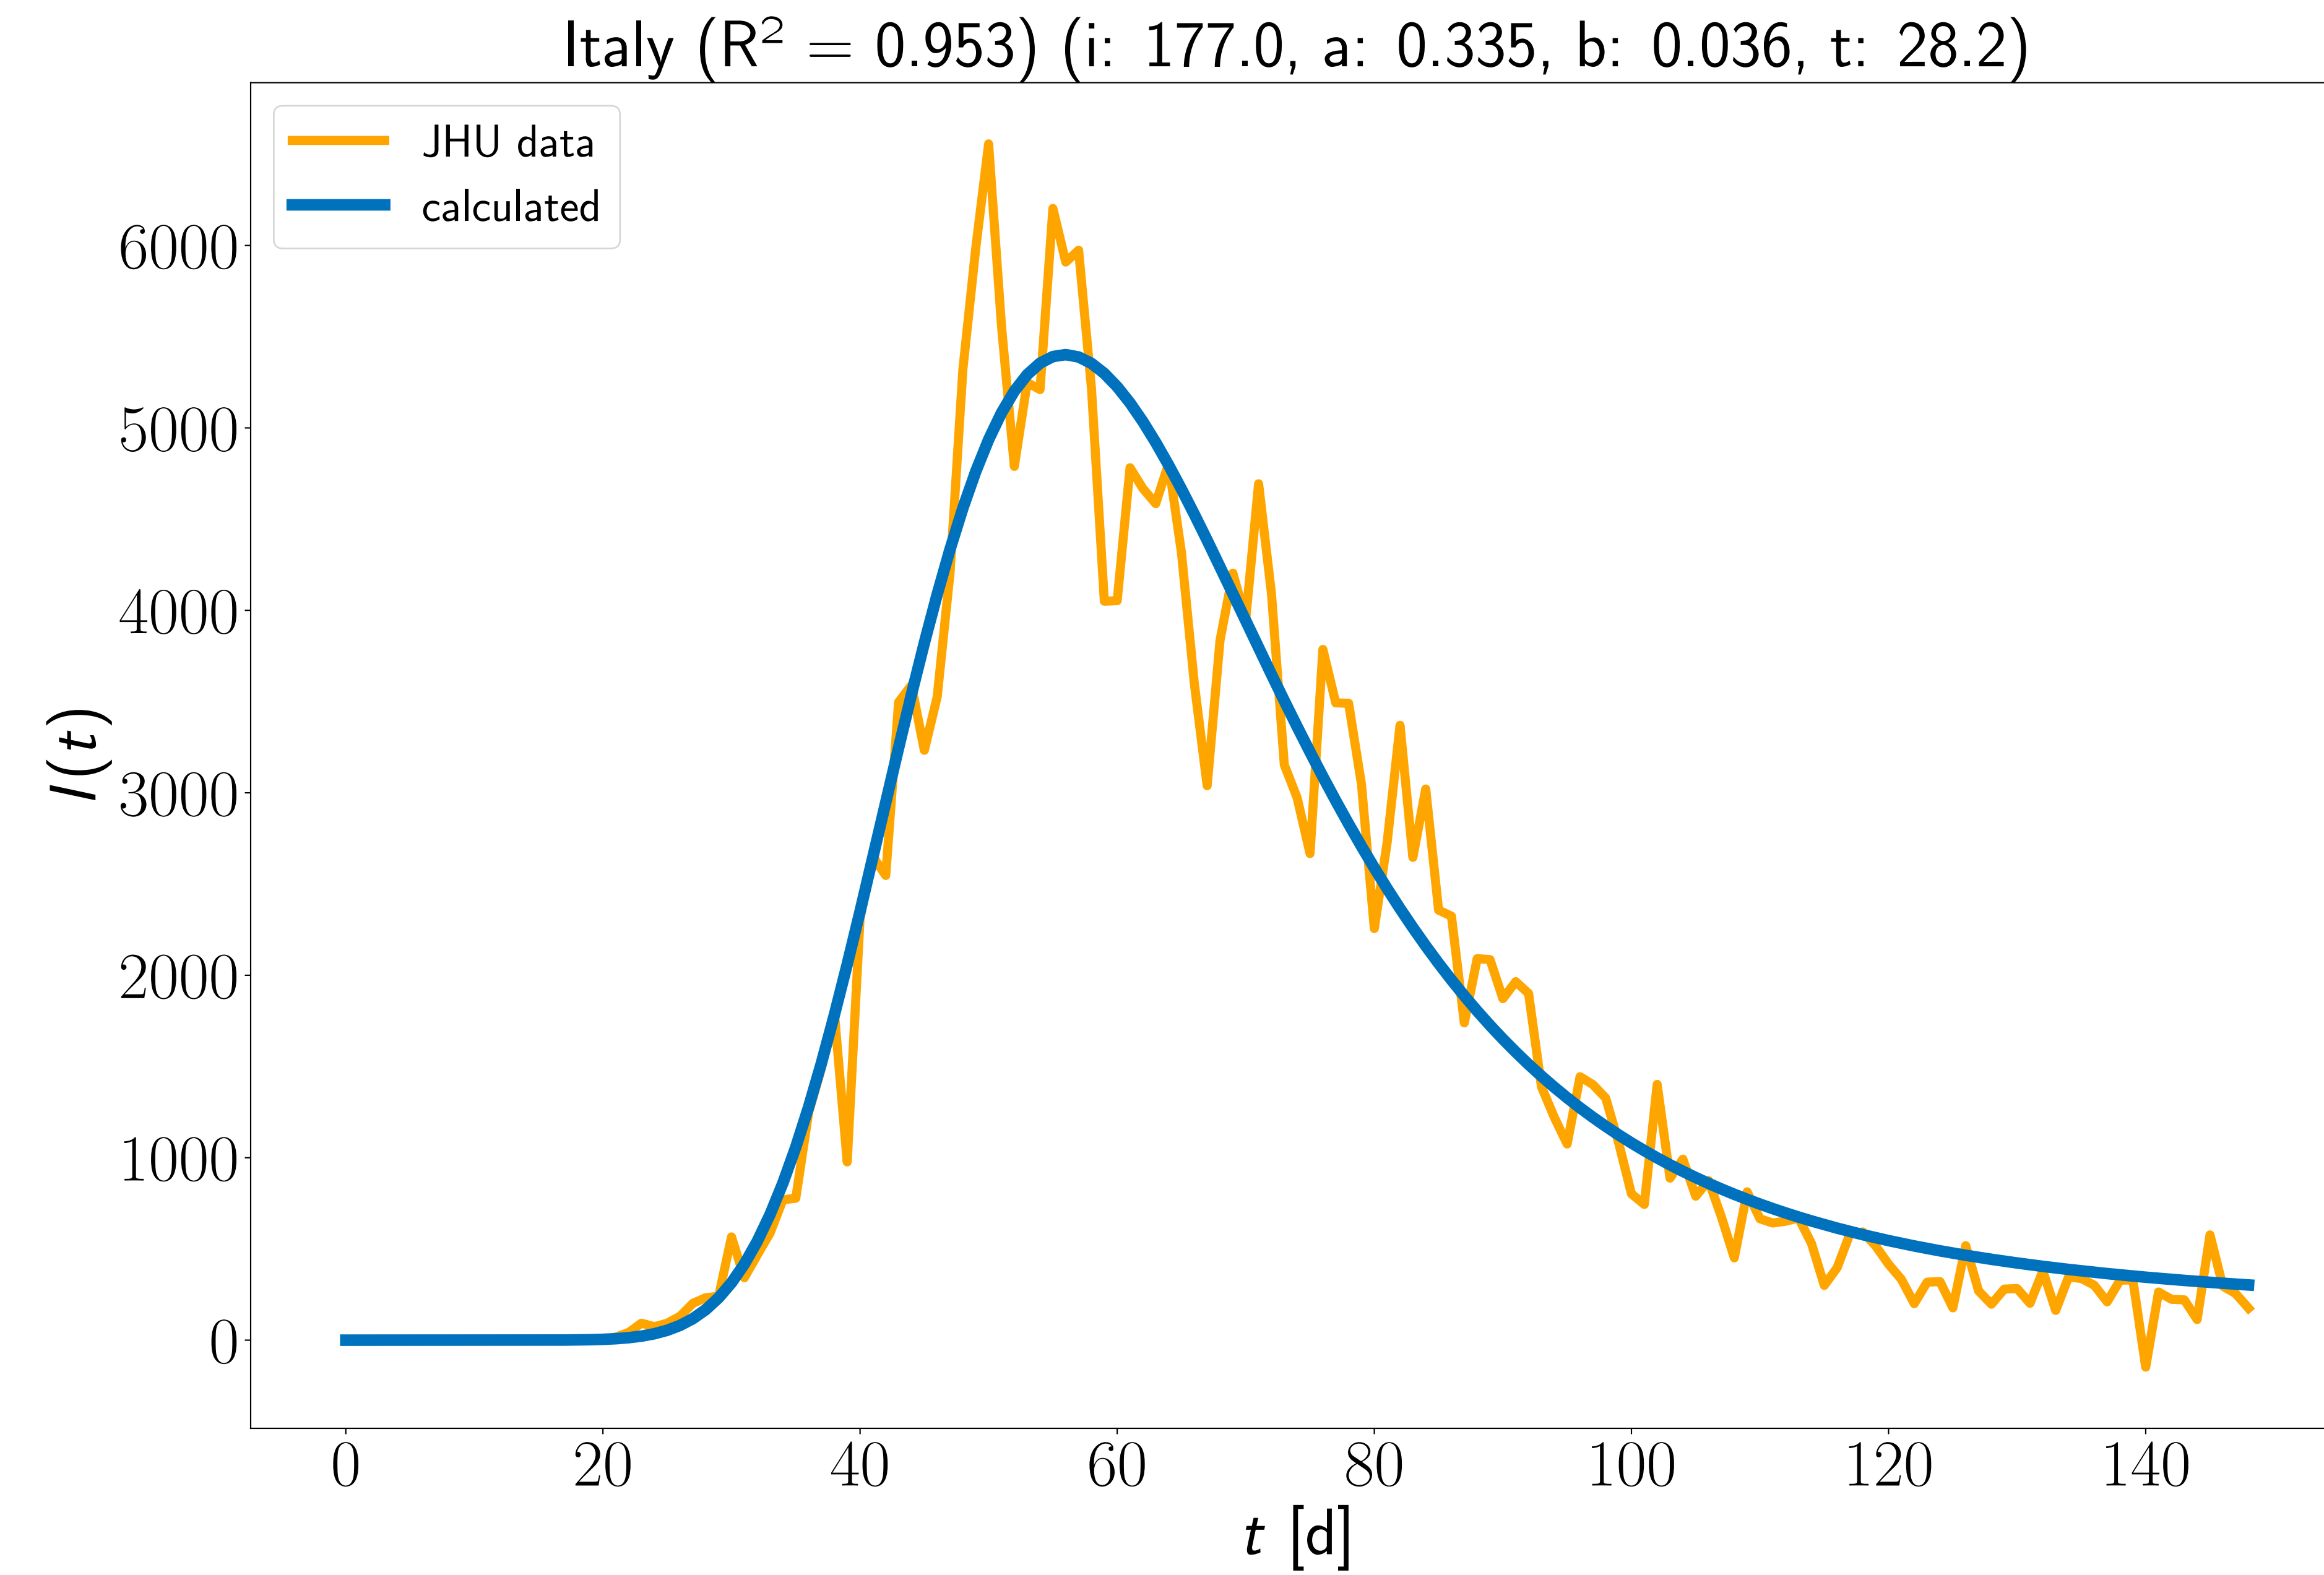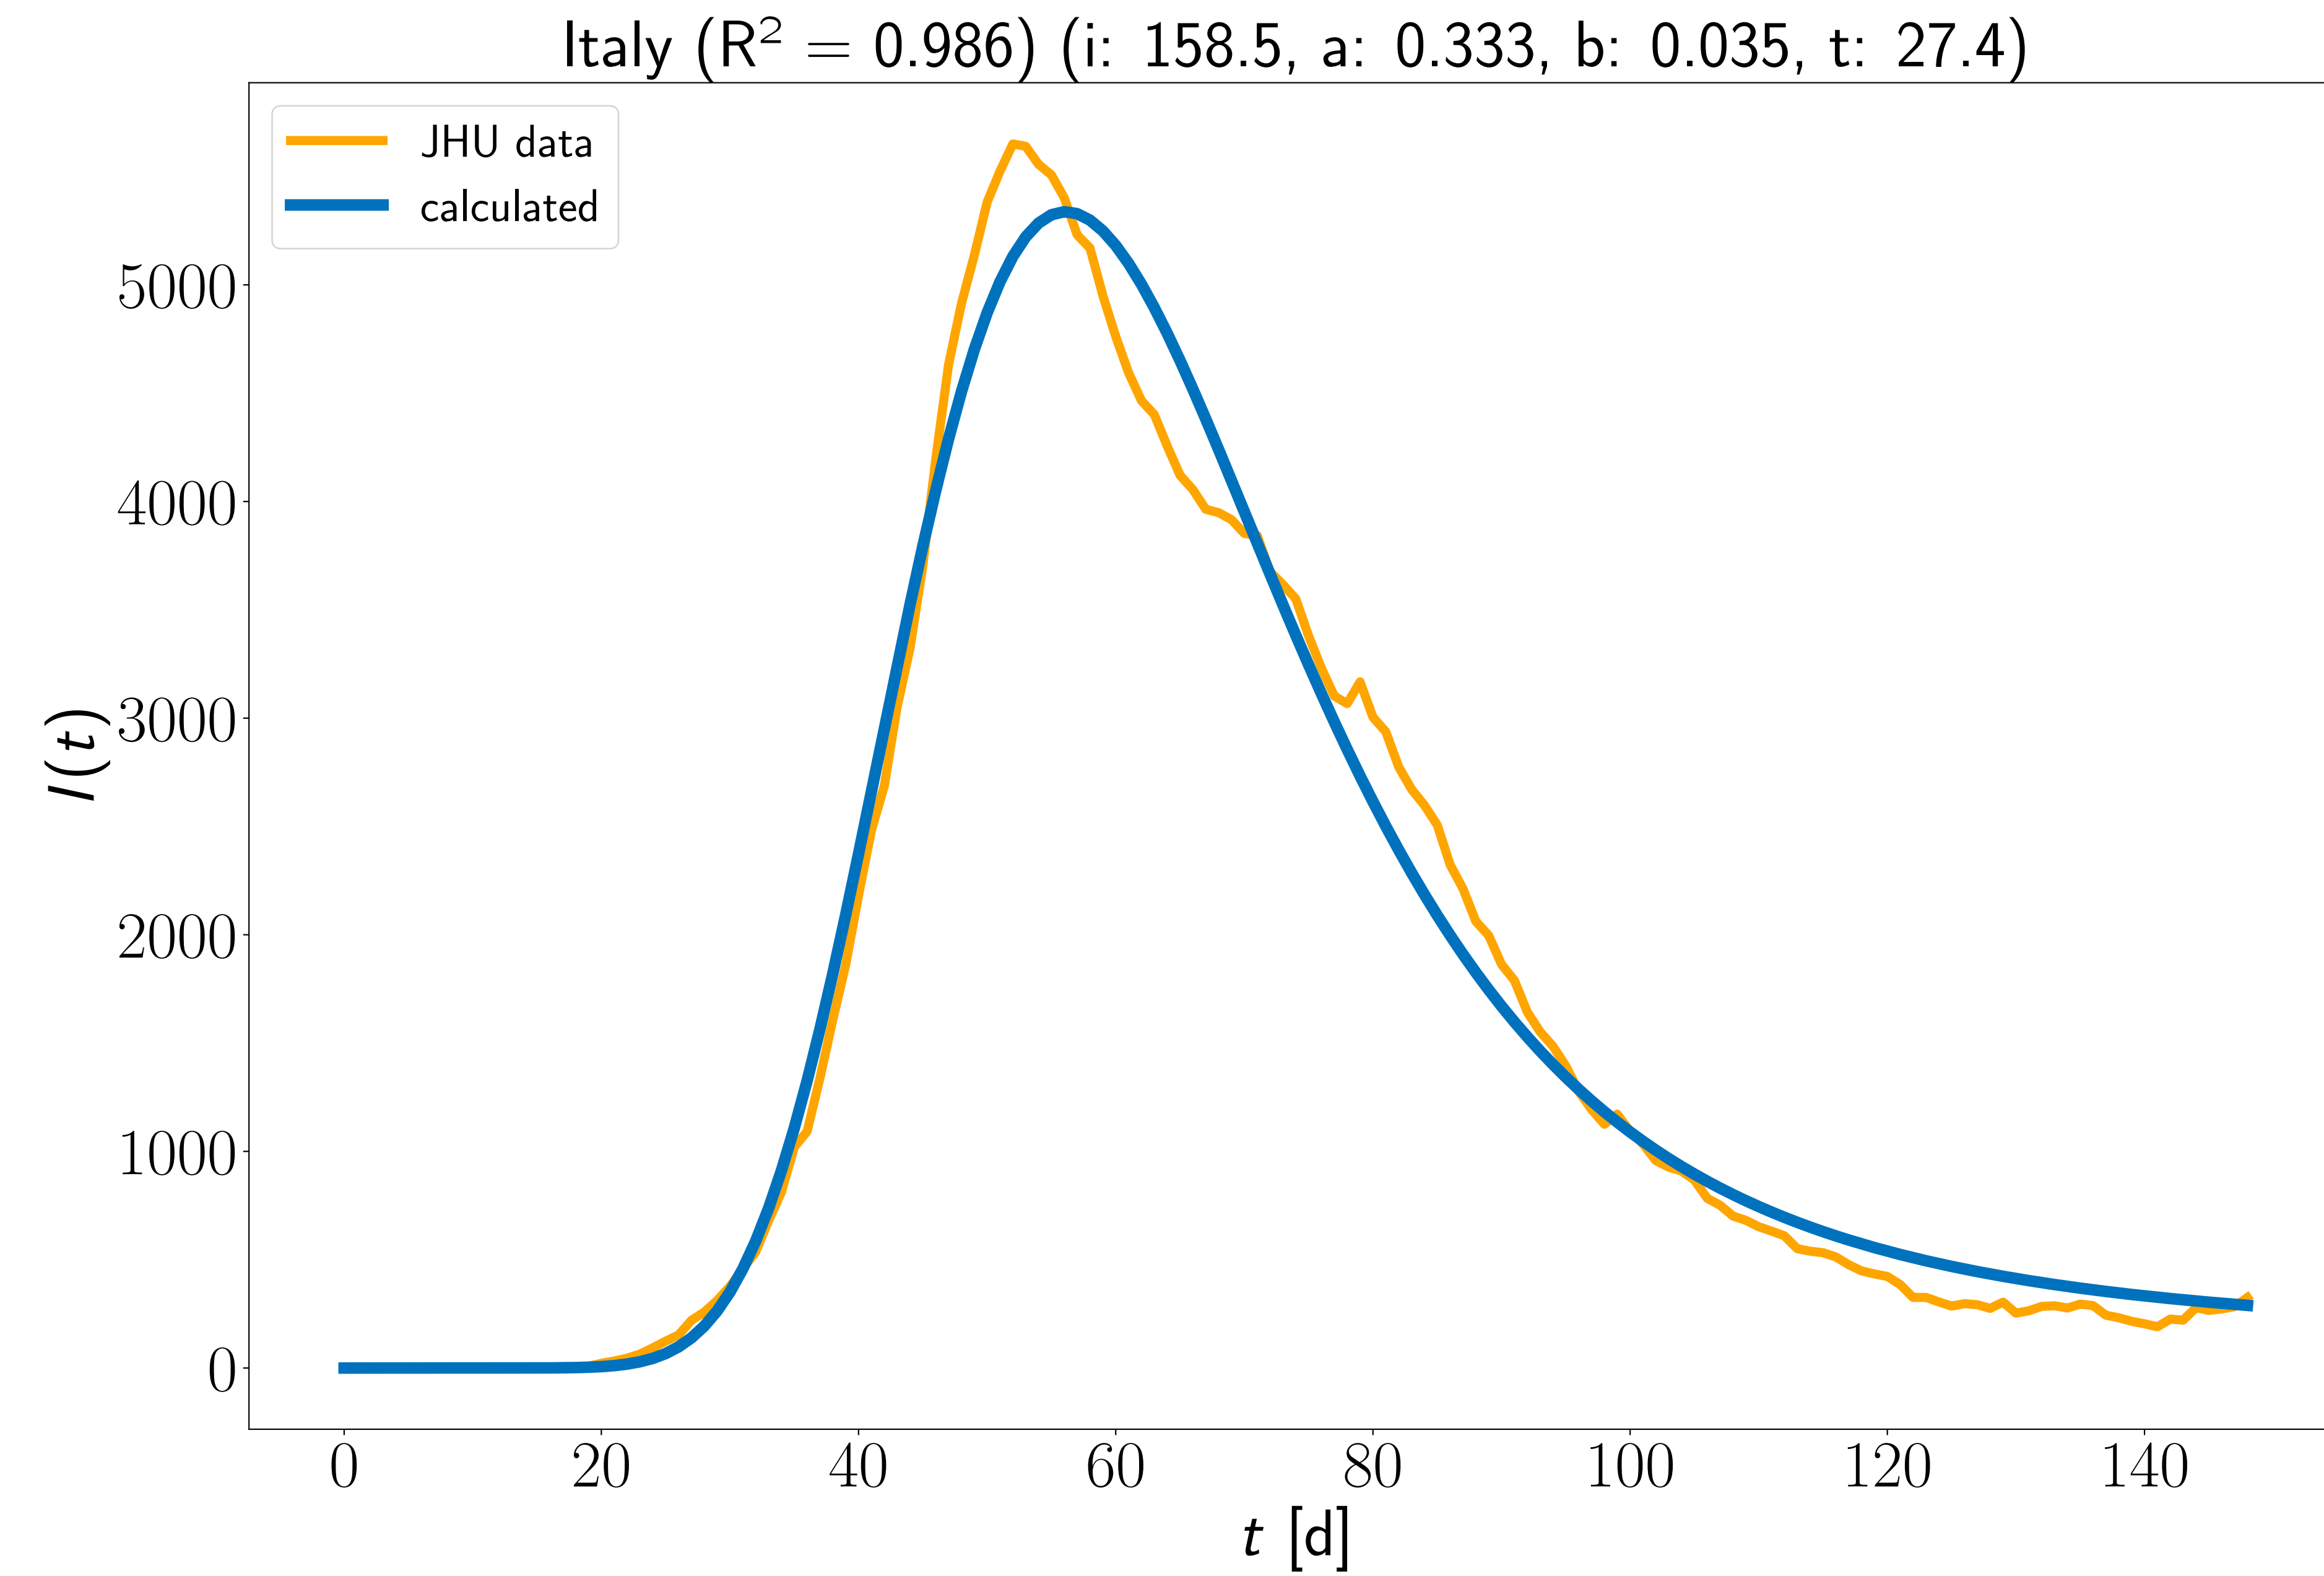

Kenya ( $R^2 = 0.825$ ) (i: 0.3, a: 0.119, b: 0.006, t: 1.0)

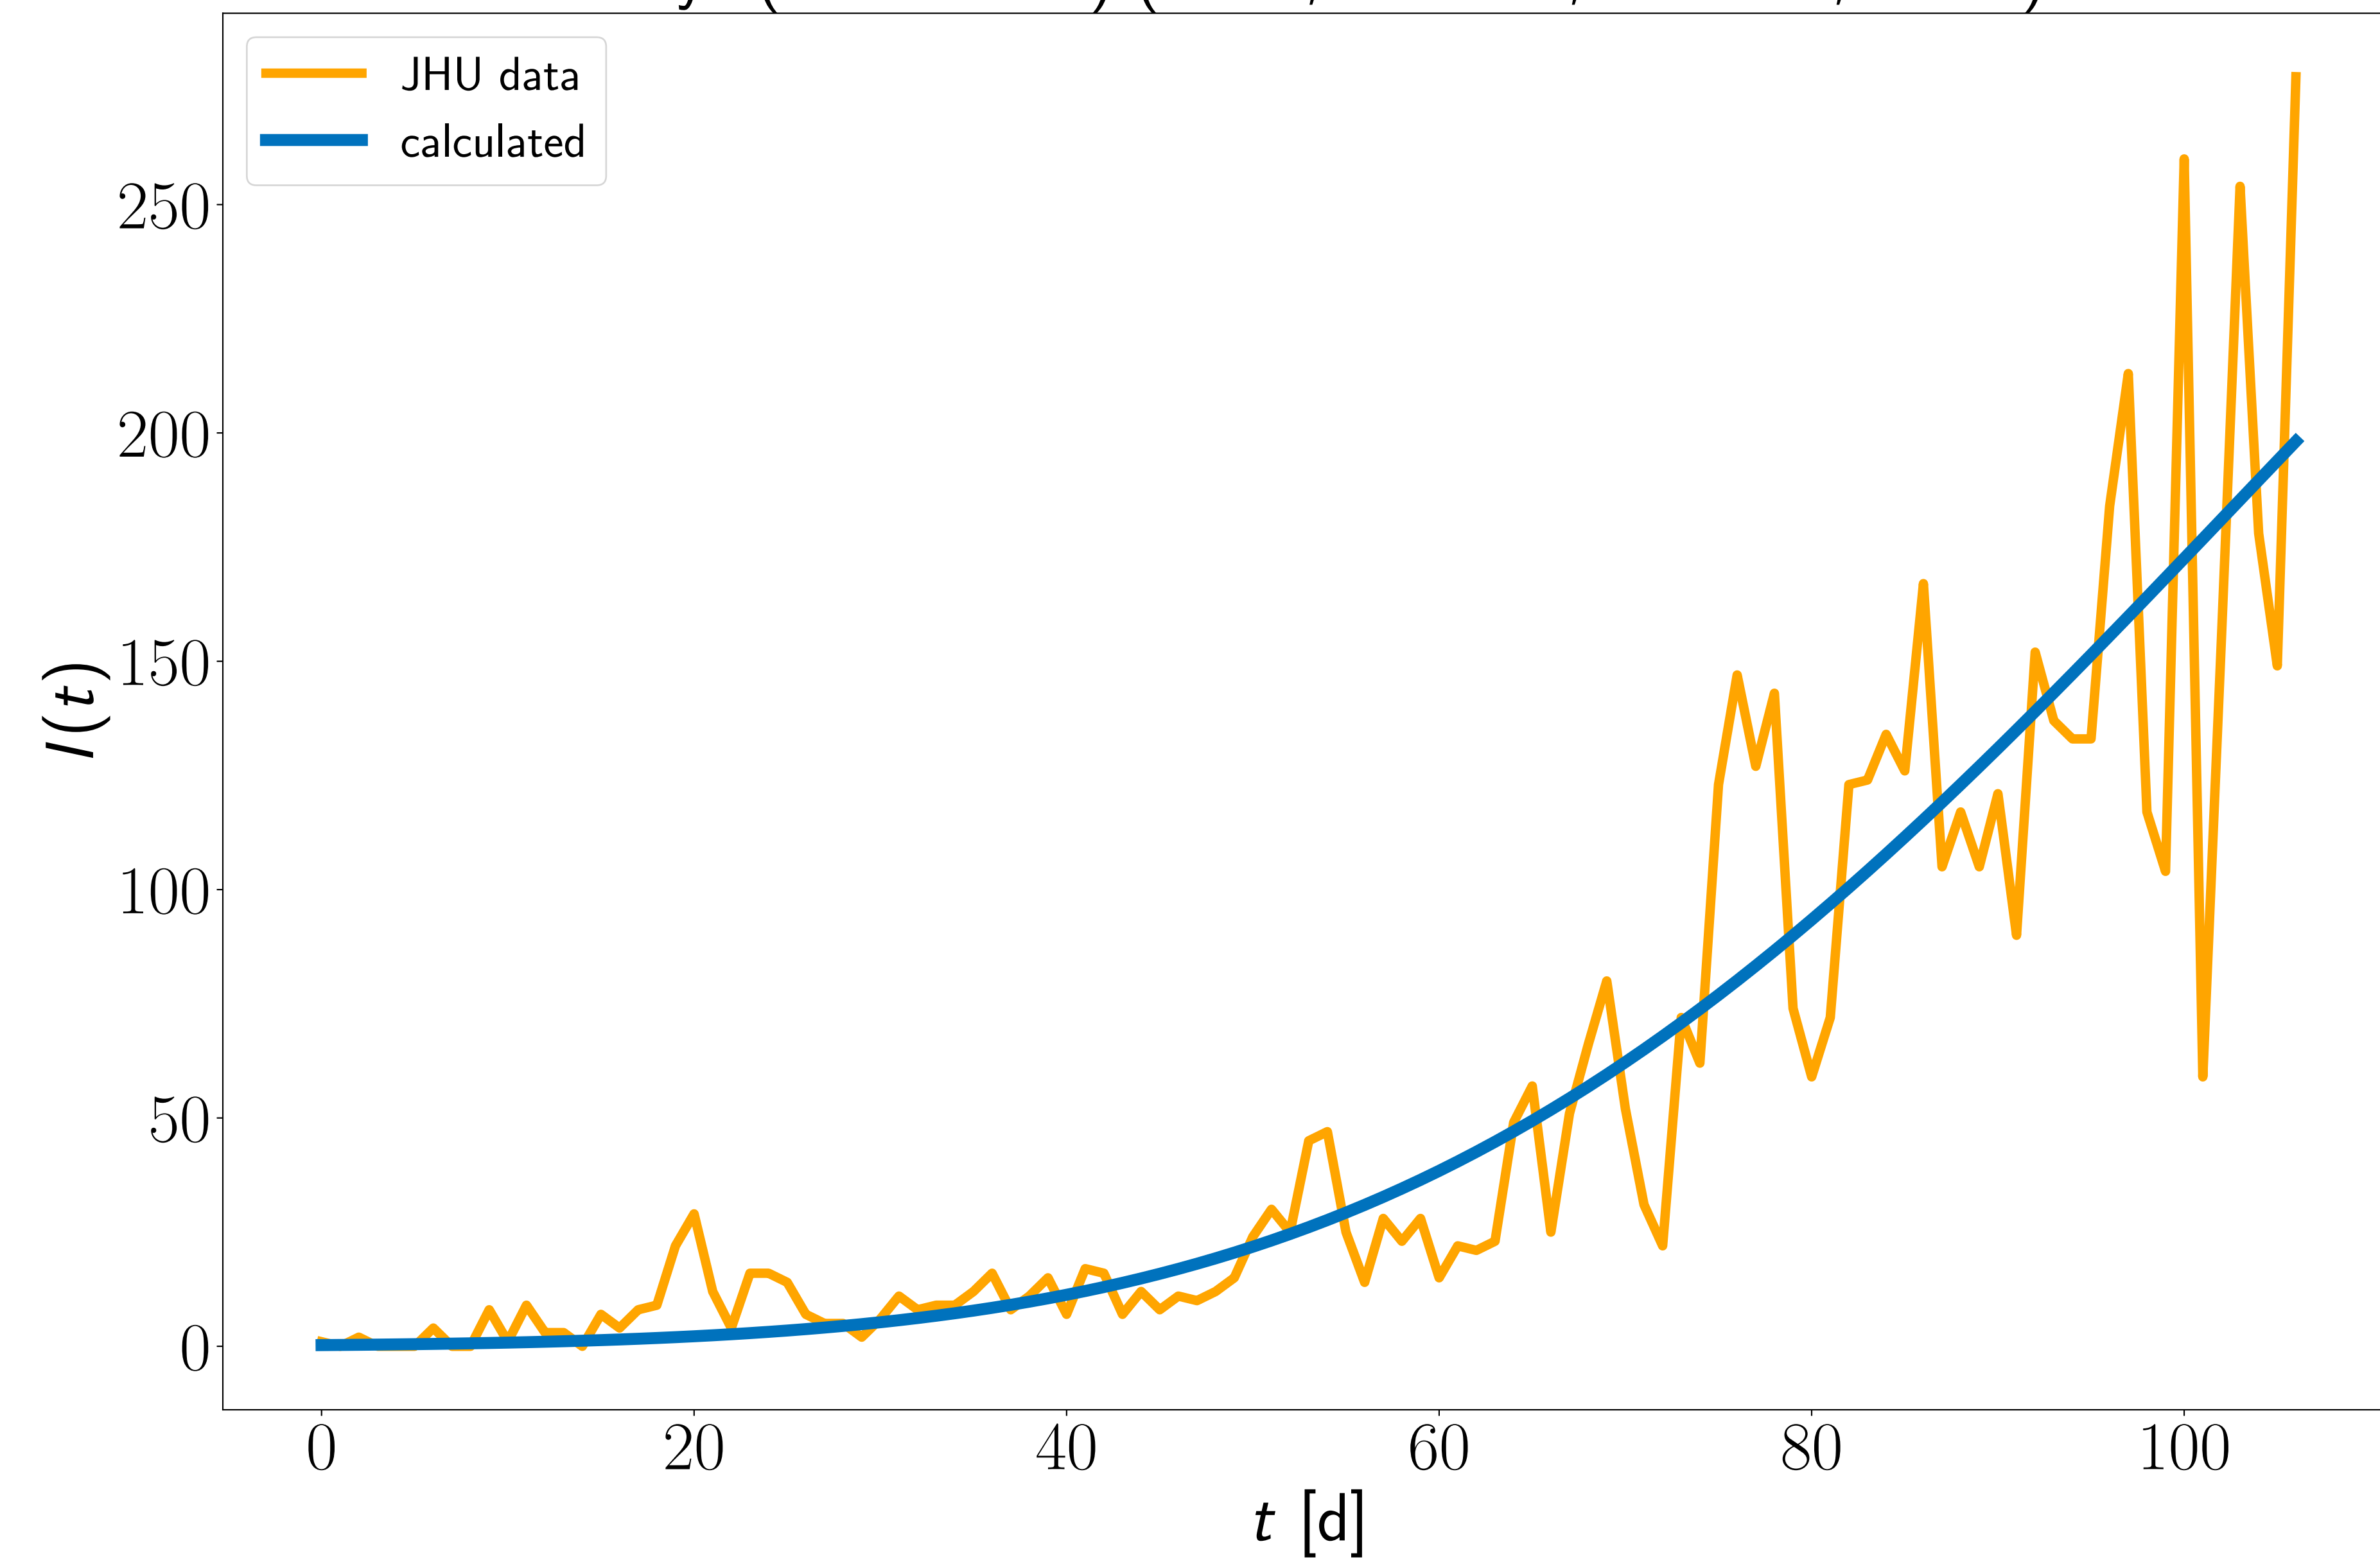

Kenya ( $R^2 = 0.977$ ) (i: 0.2, a: 0.137, b: 0.007, t: 1.0)

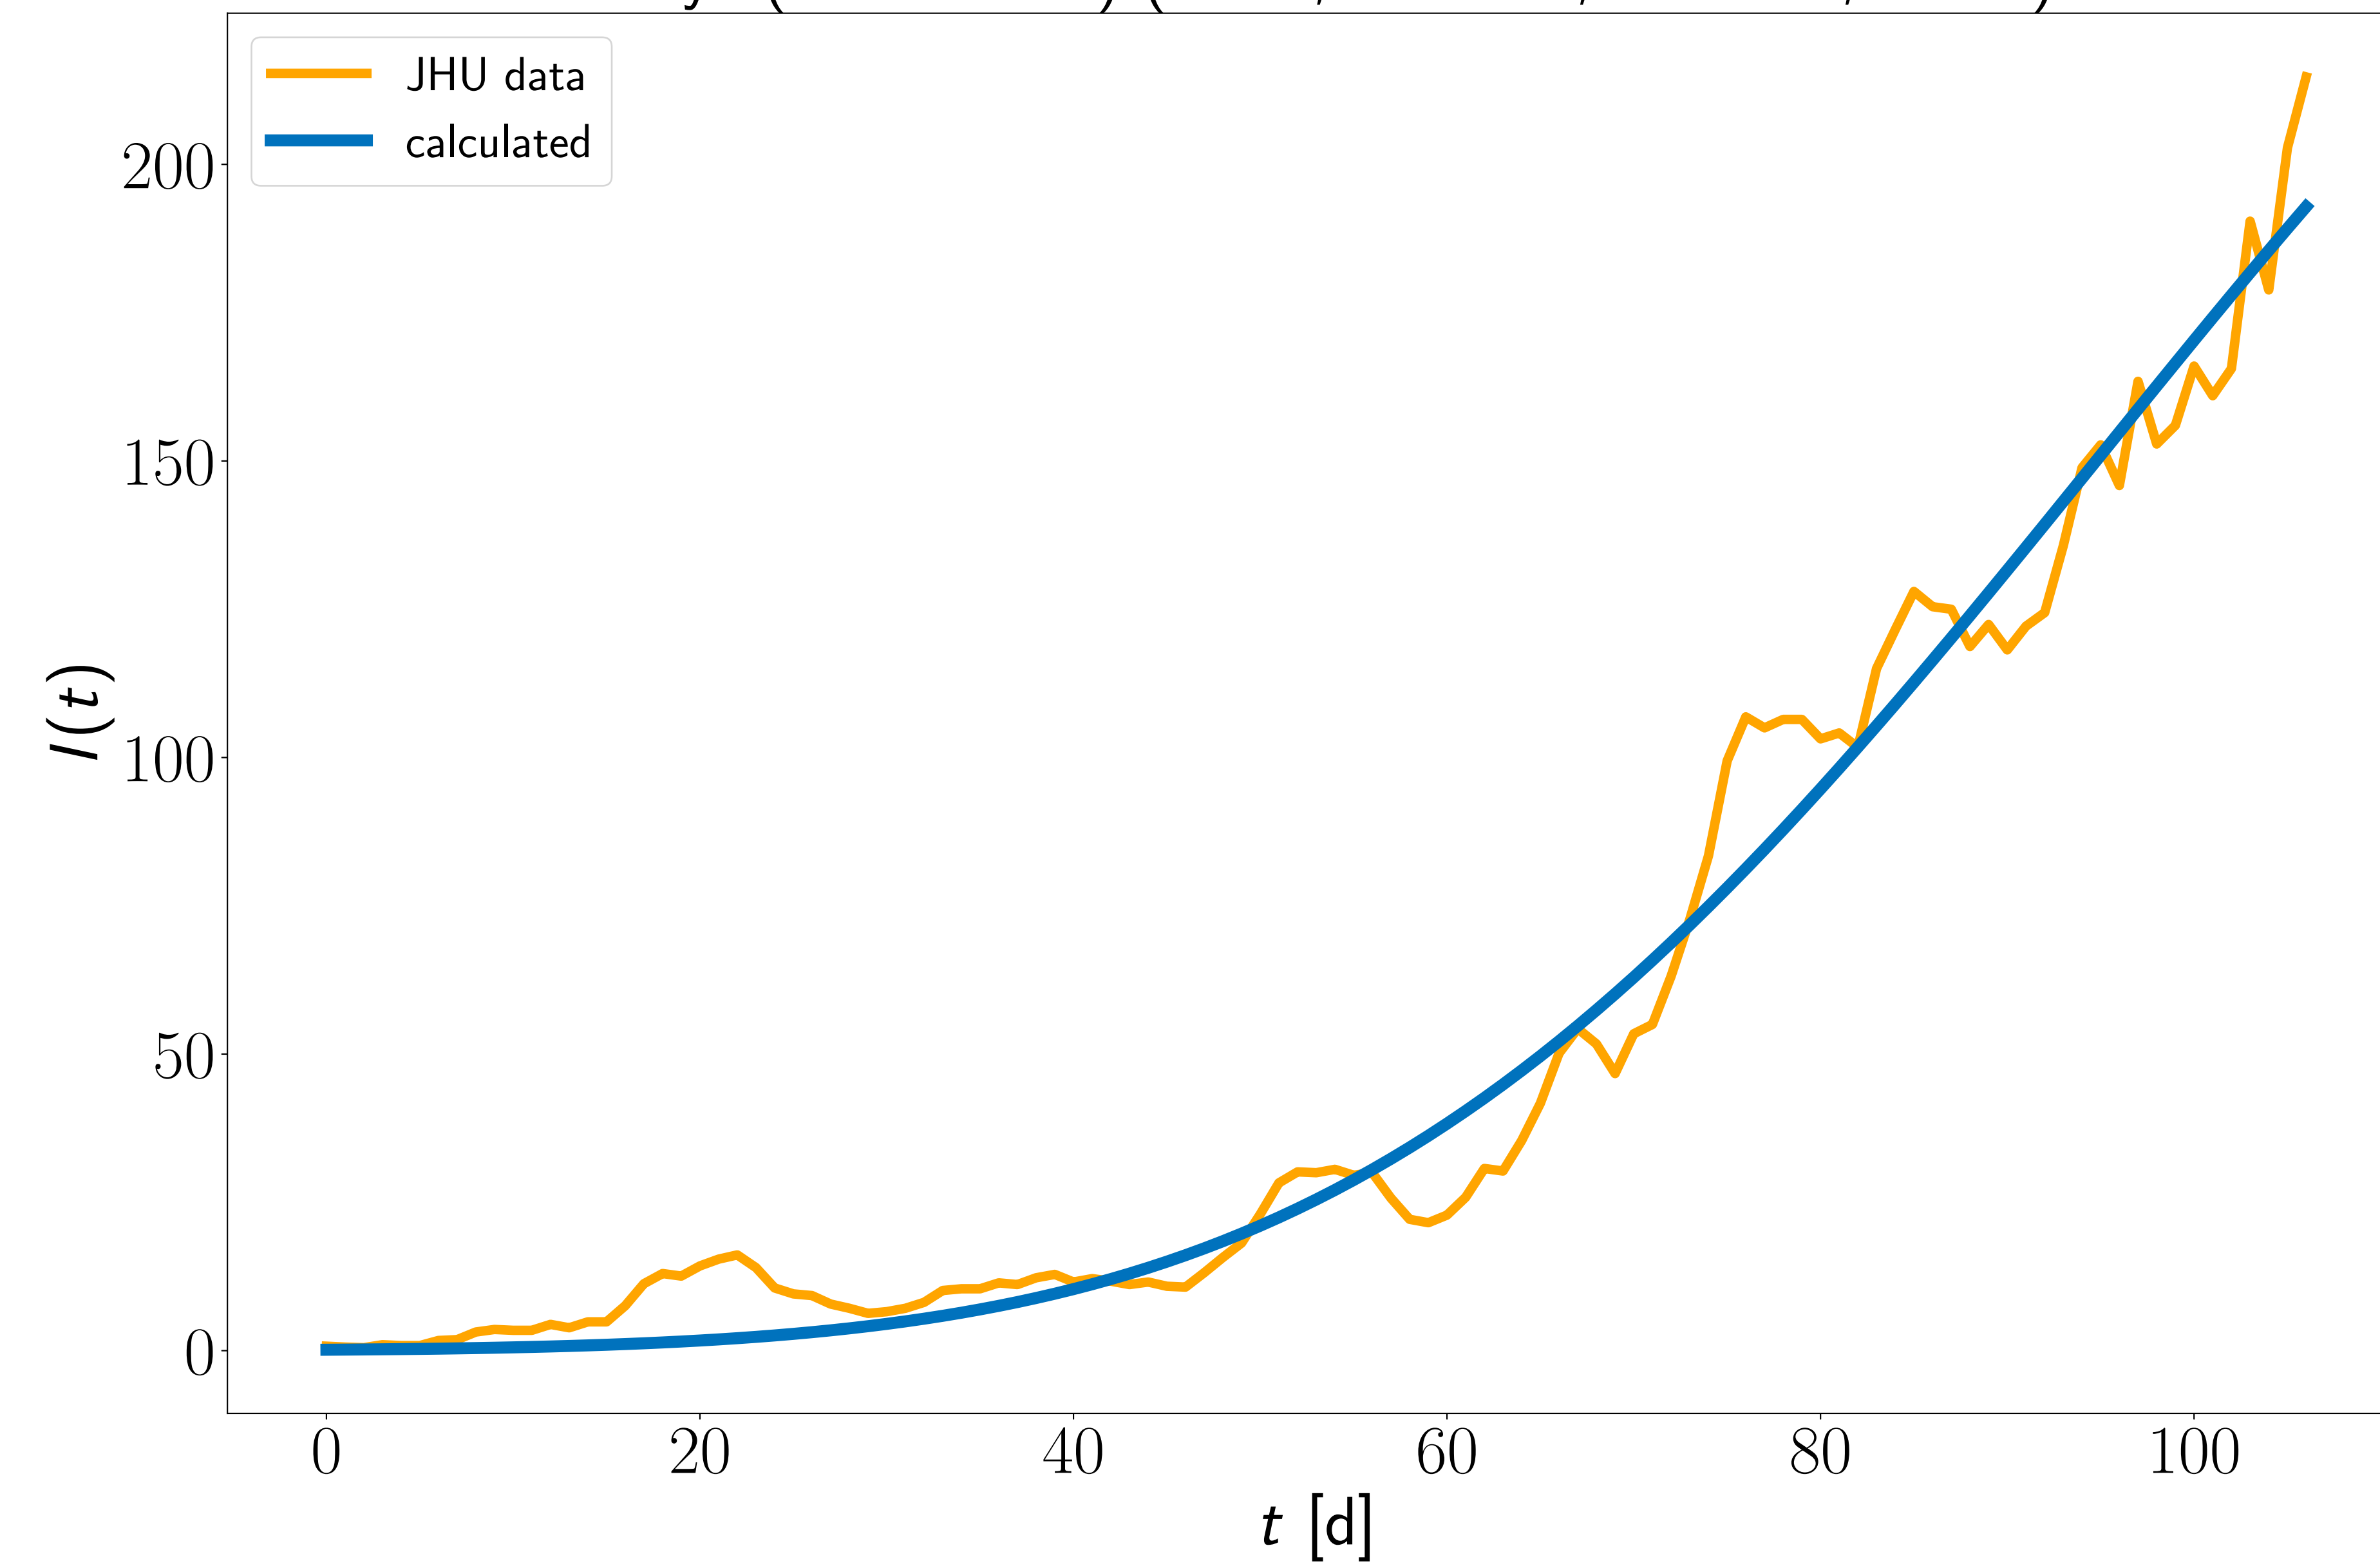

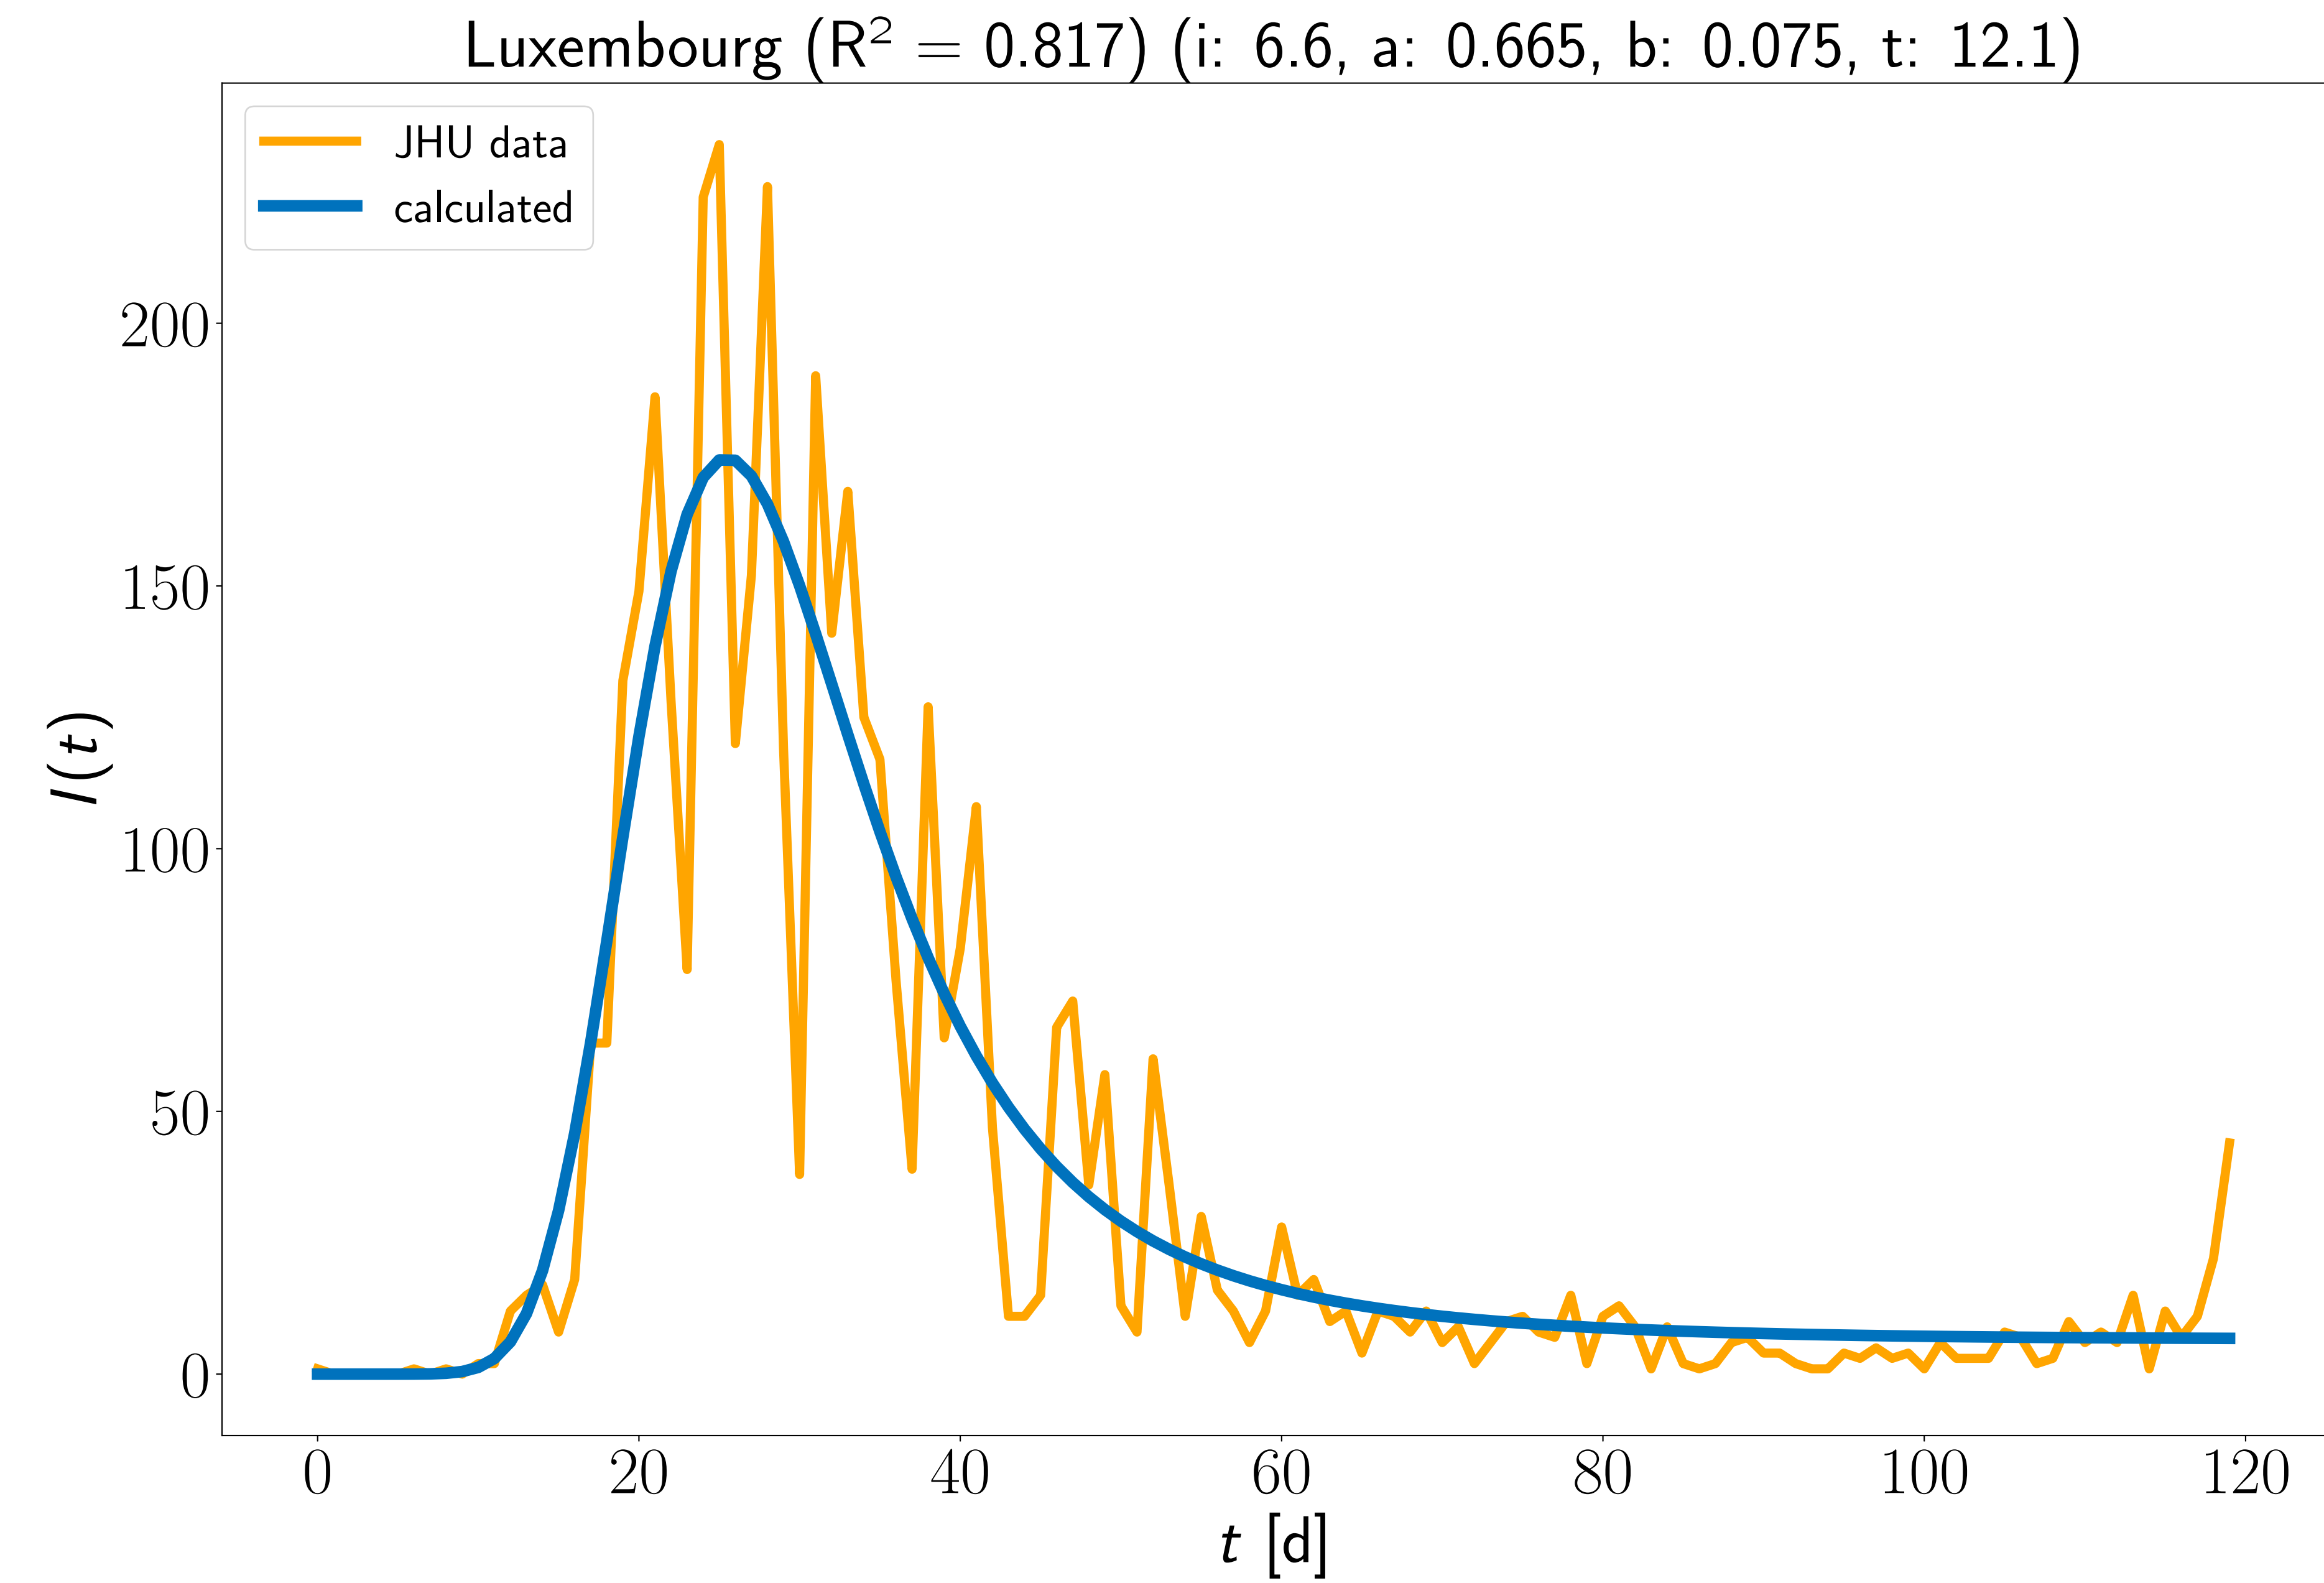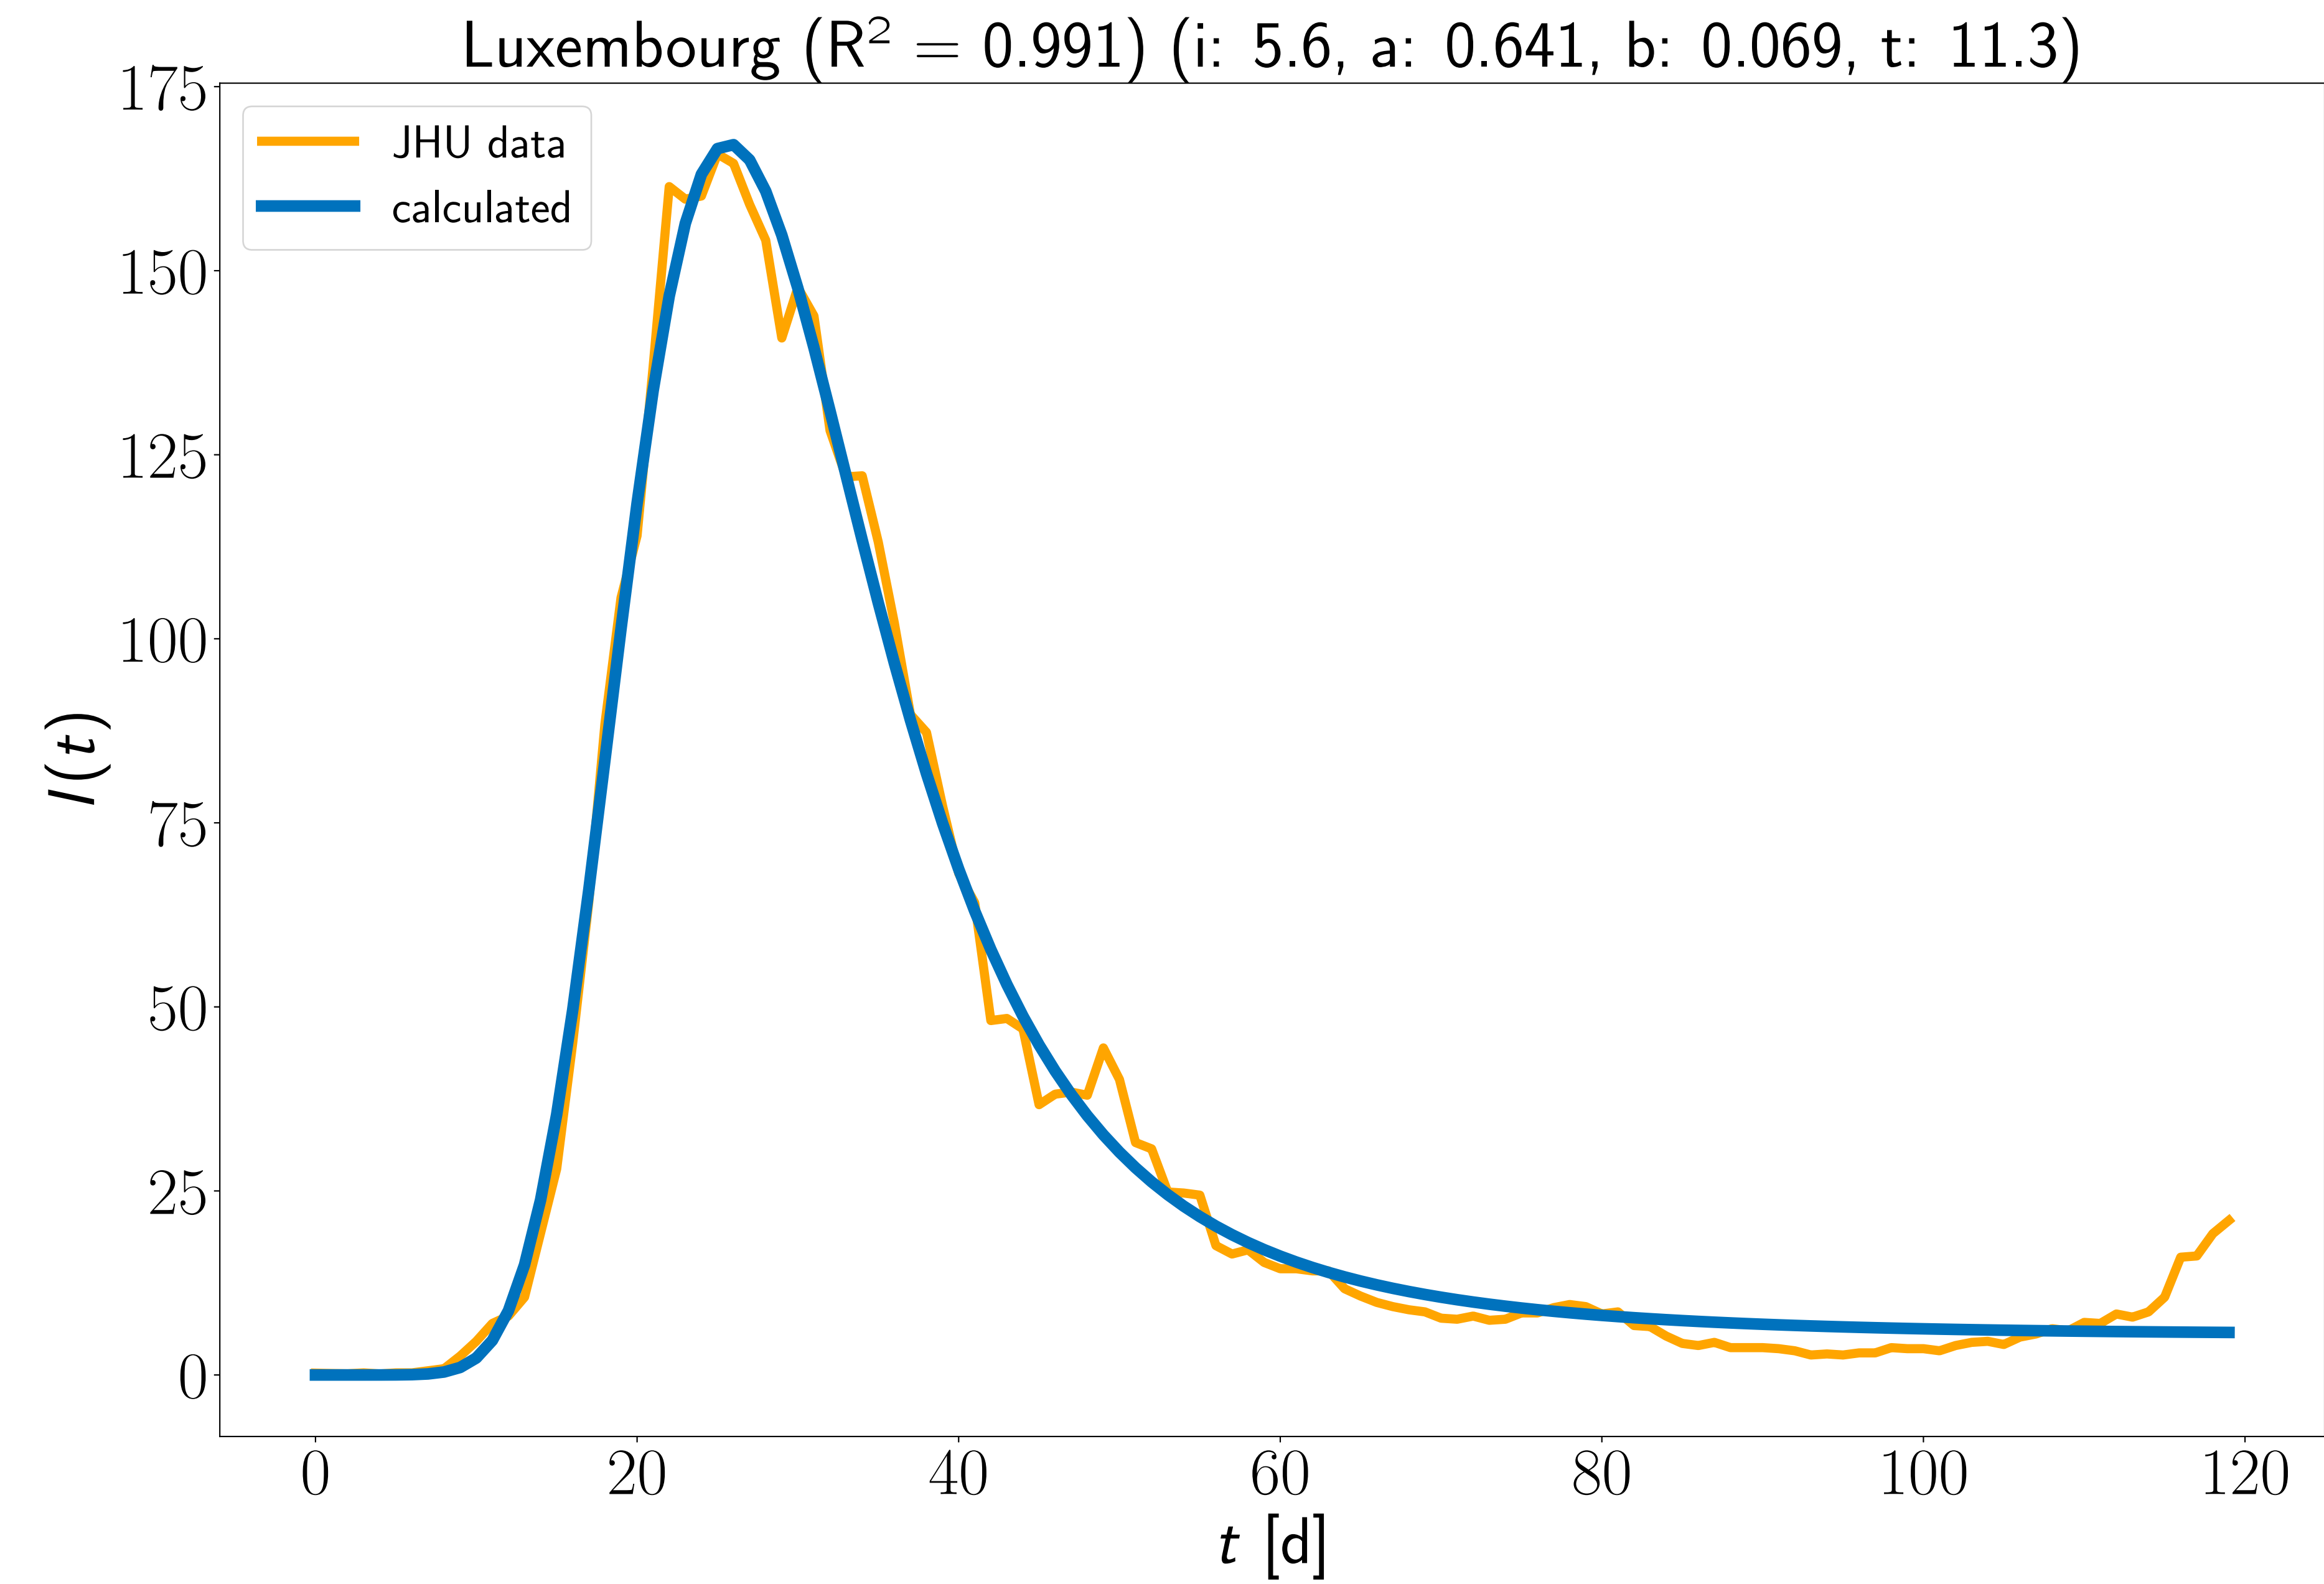

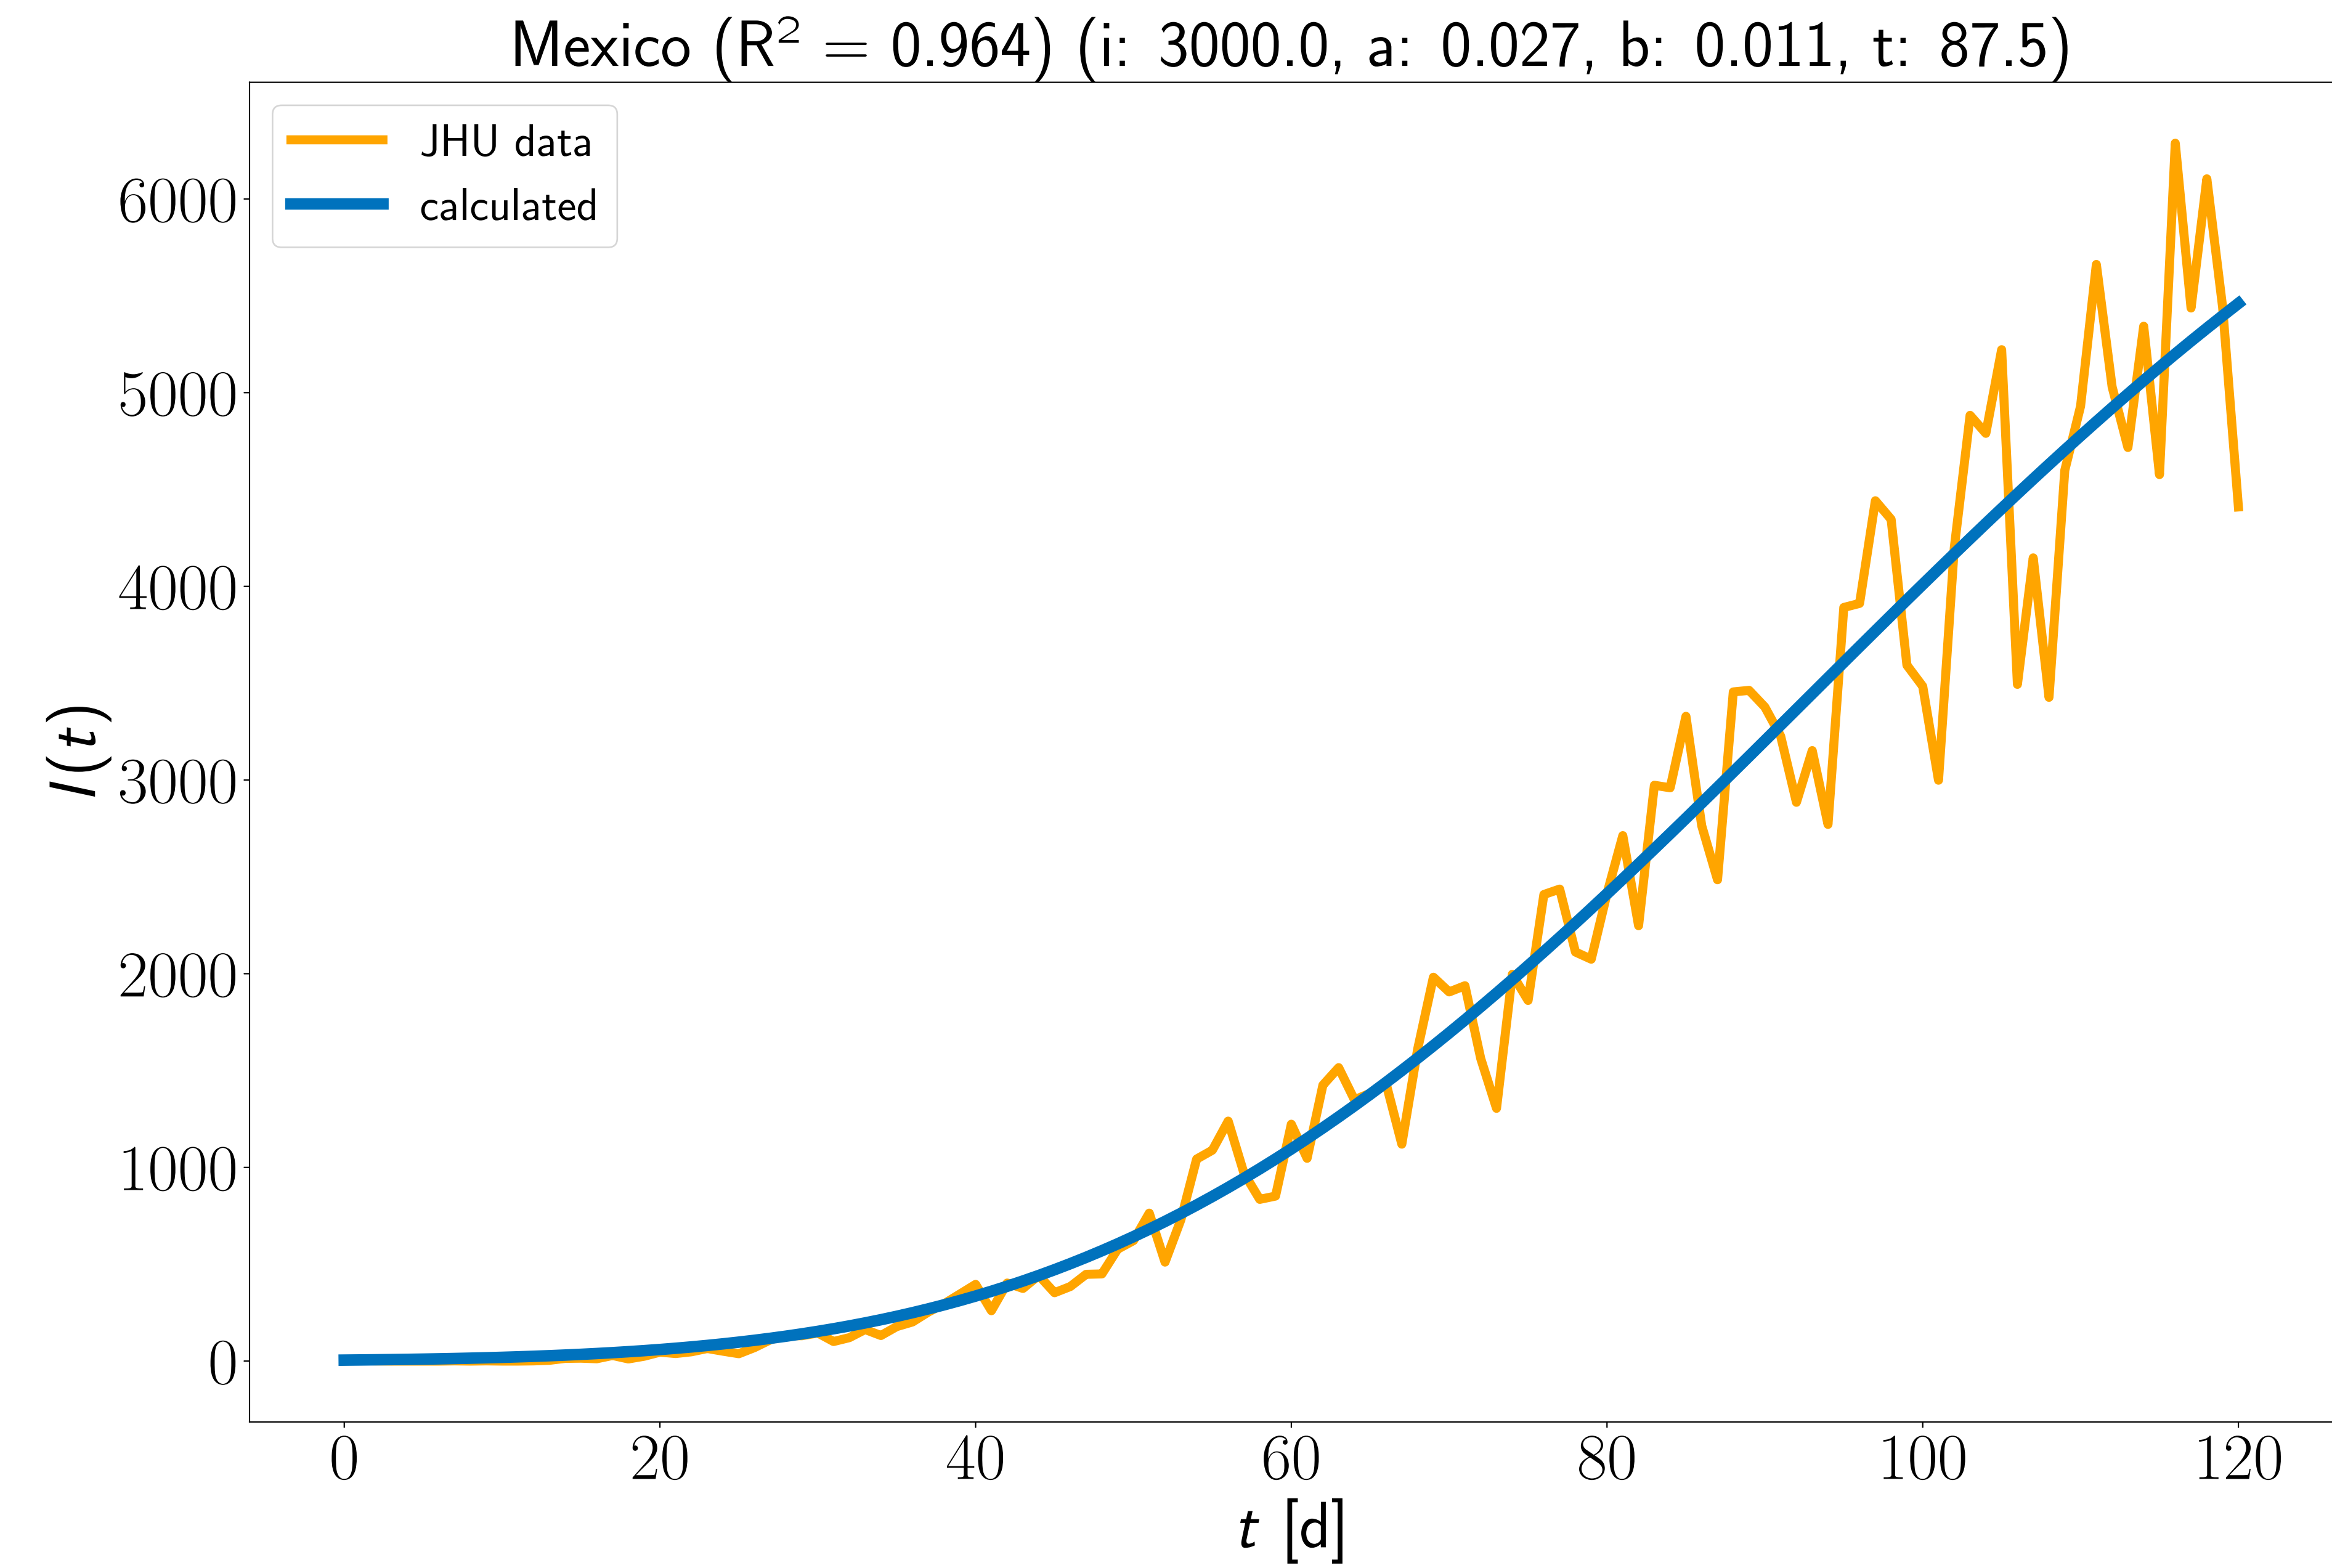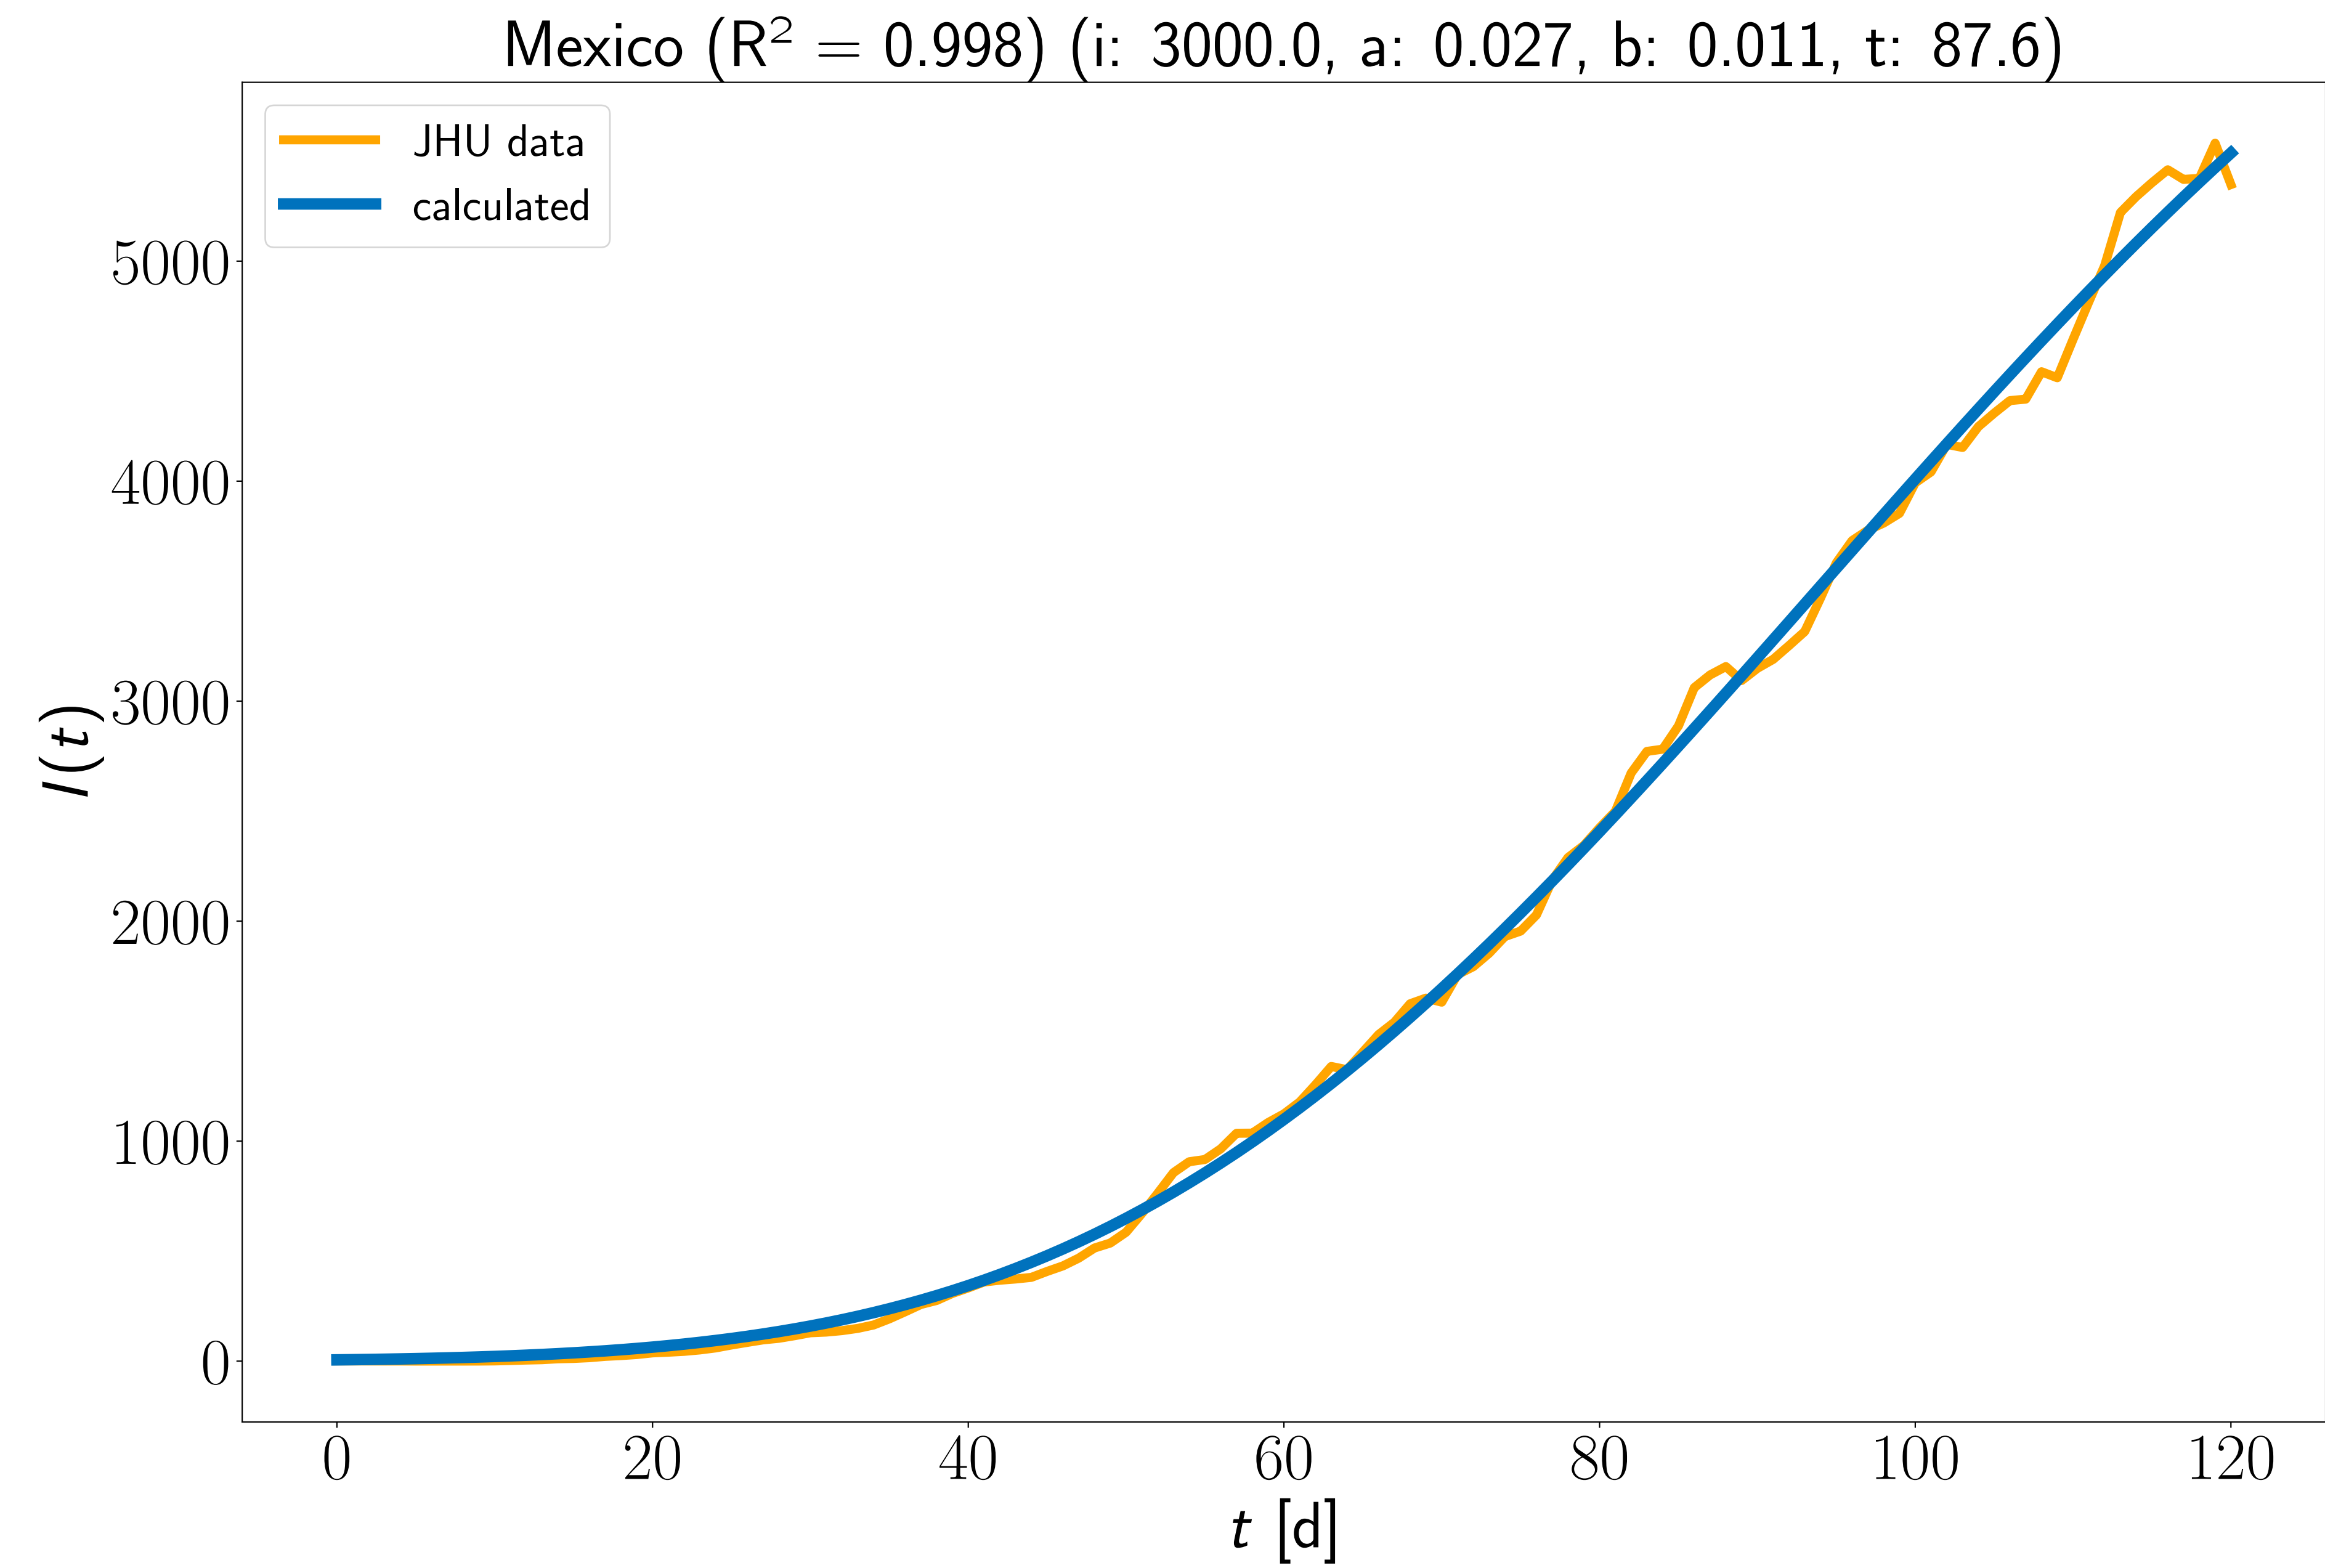

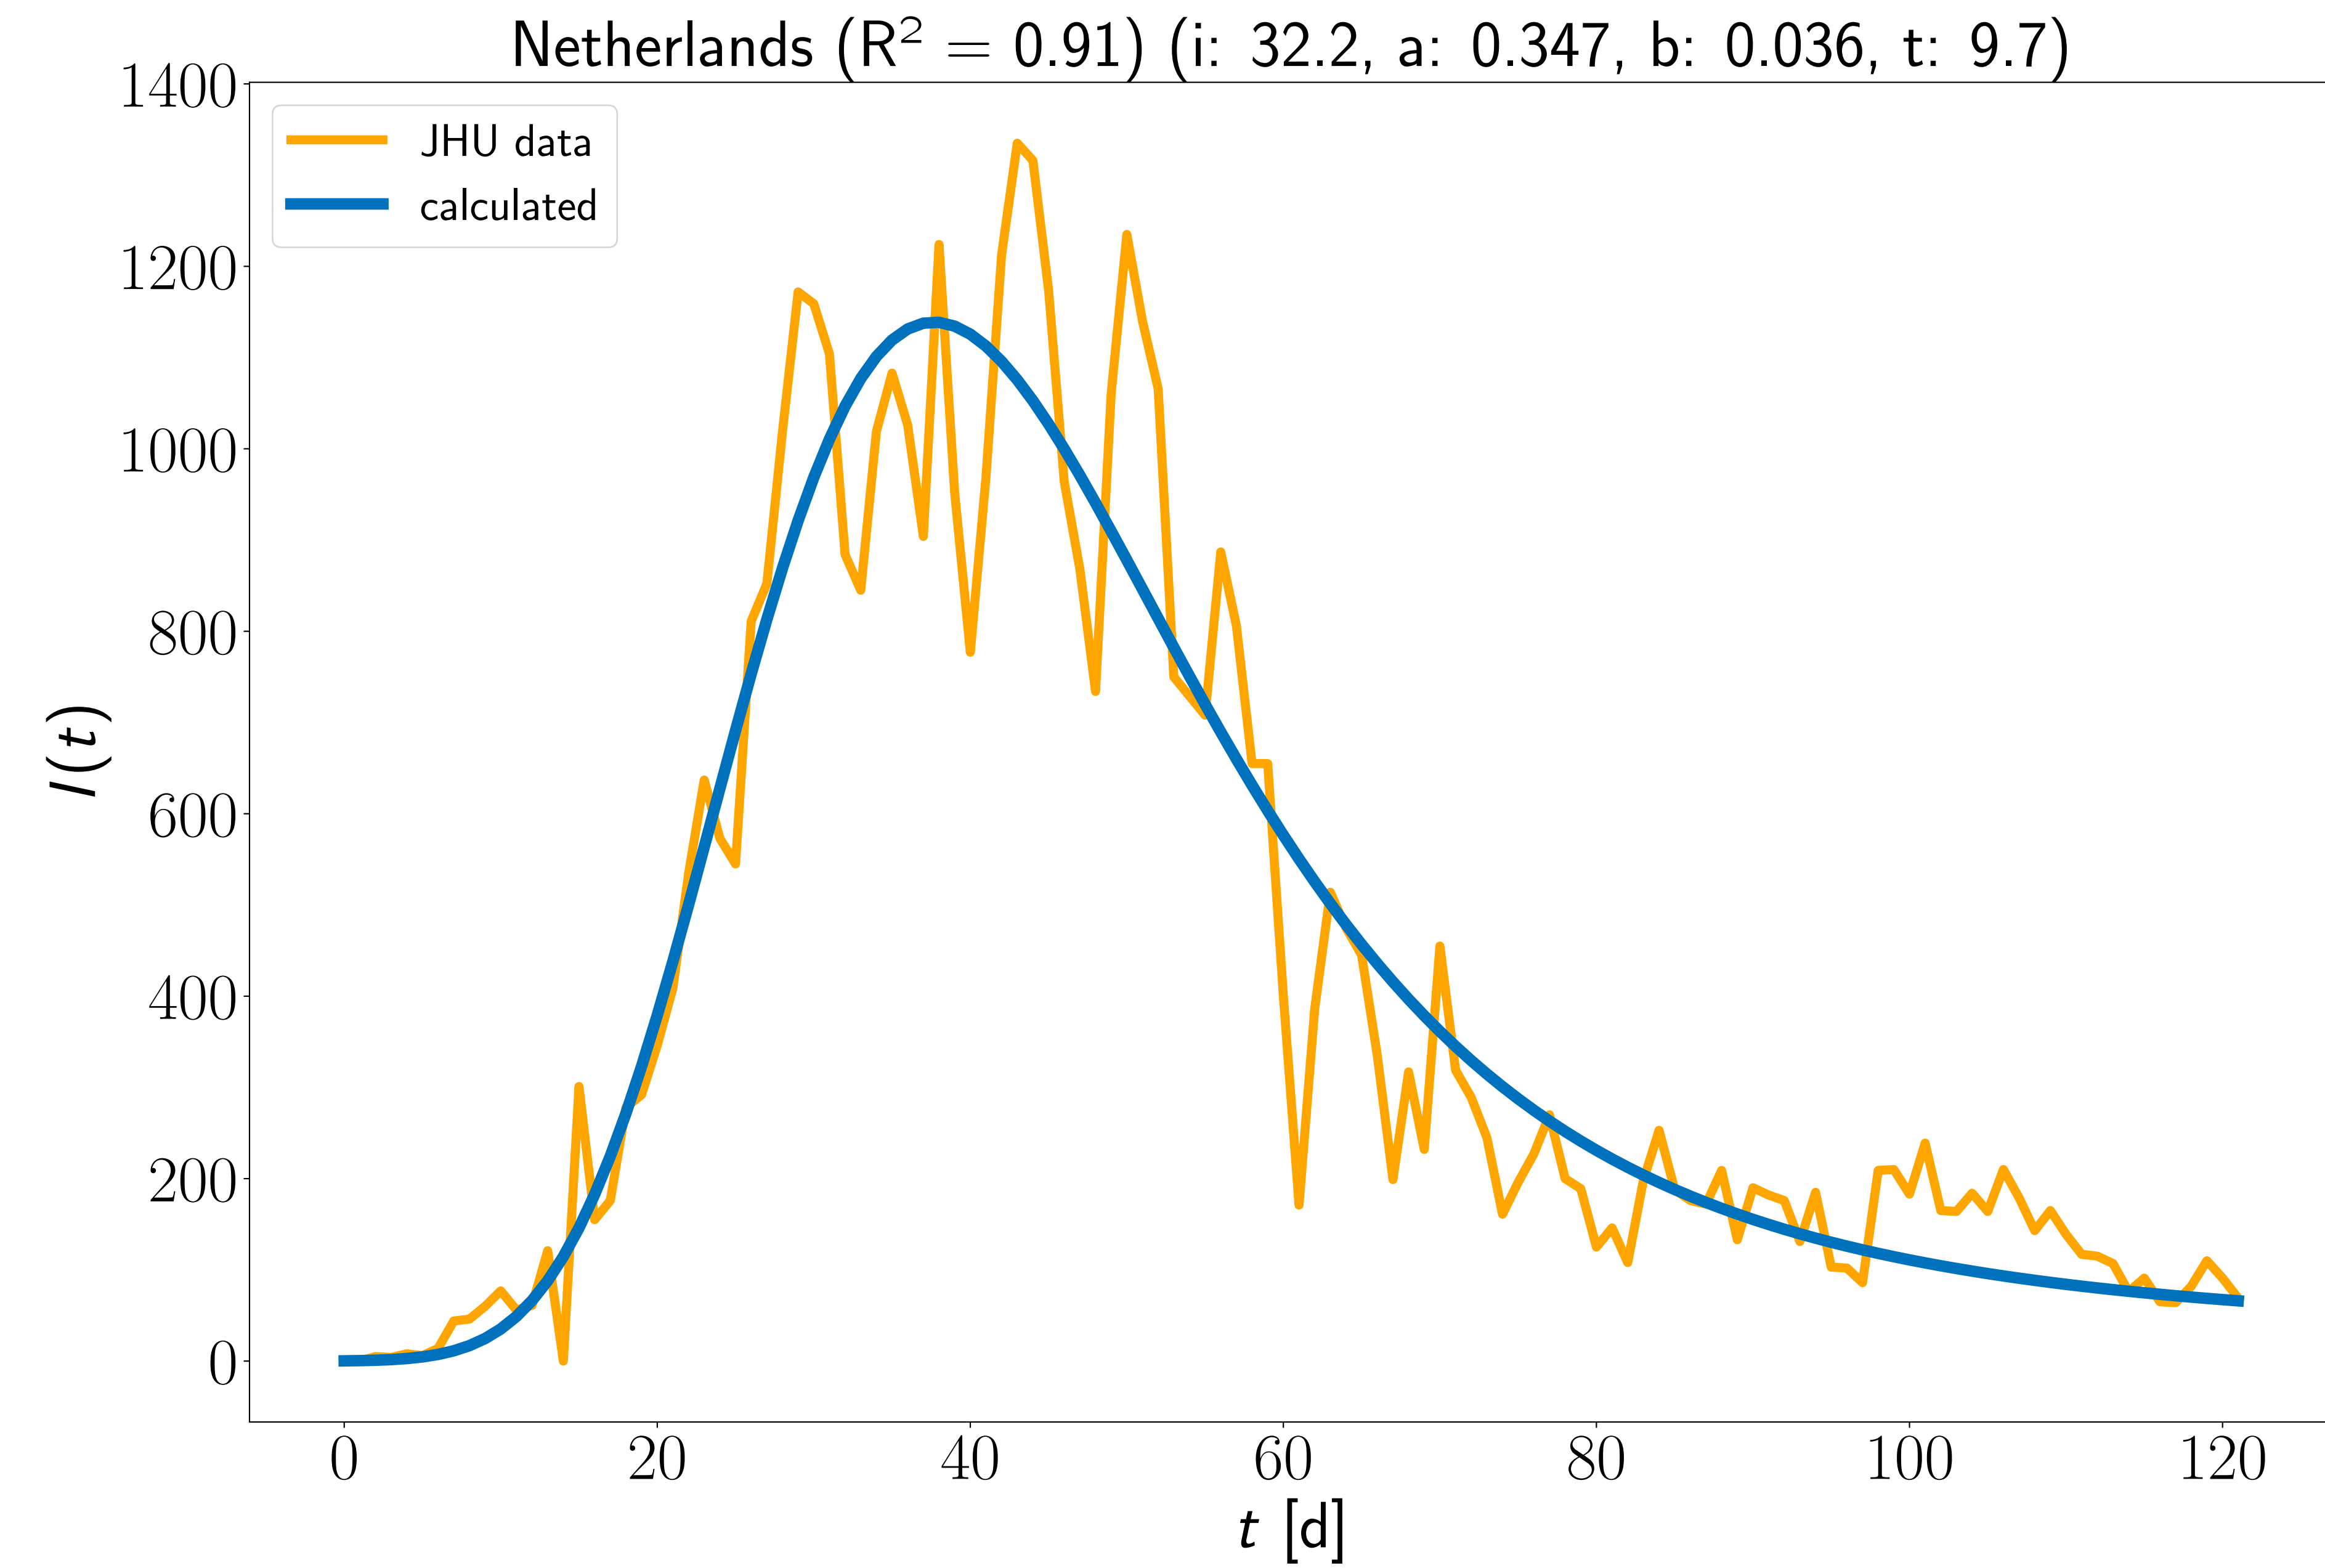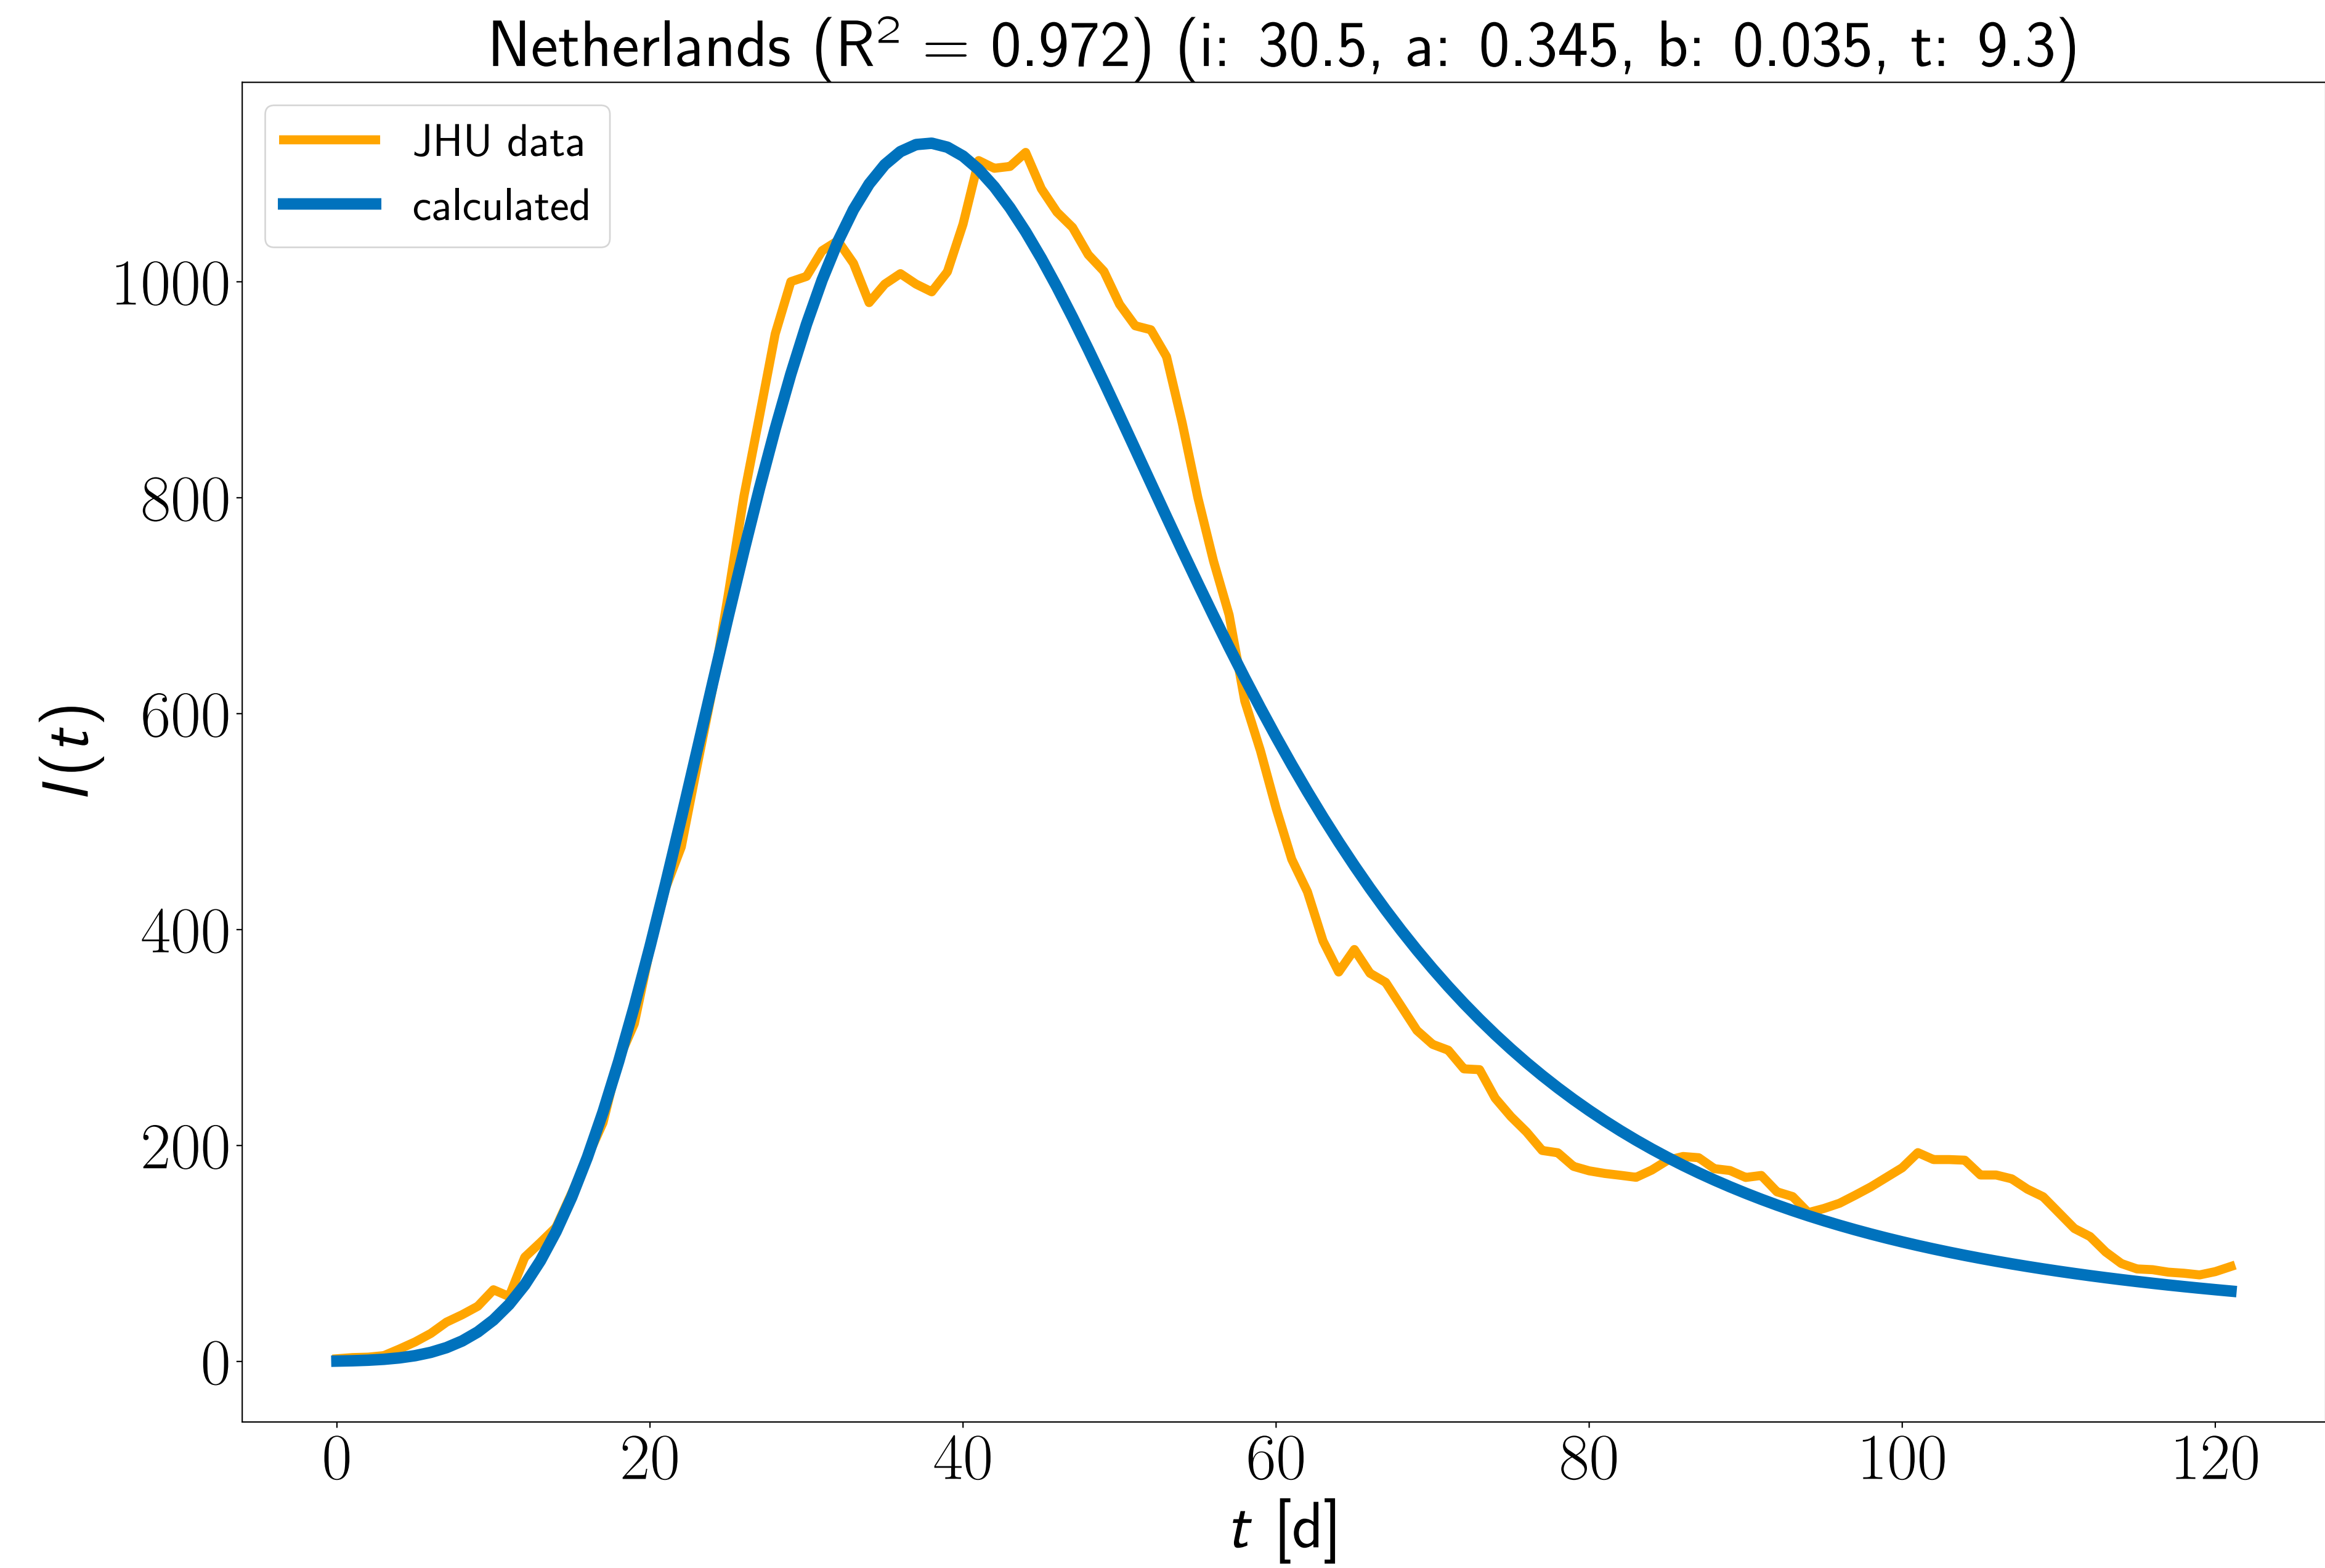

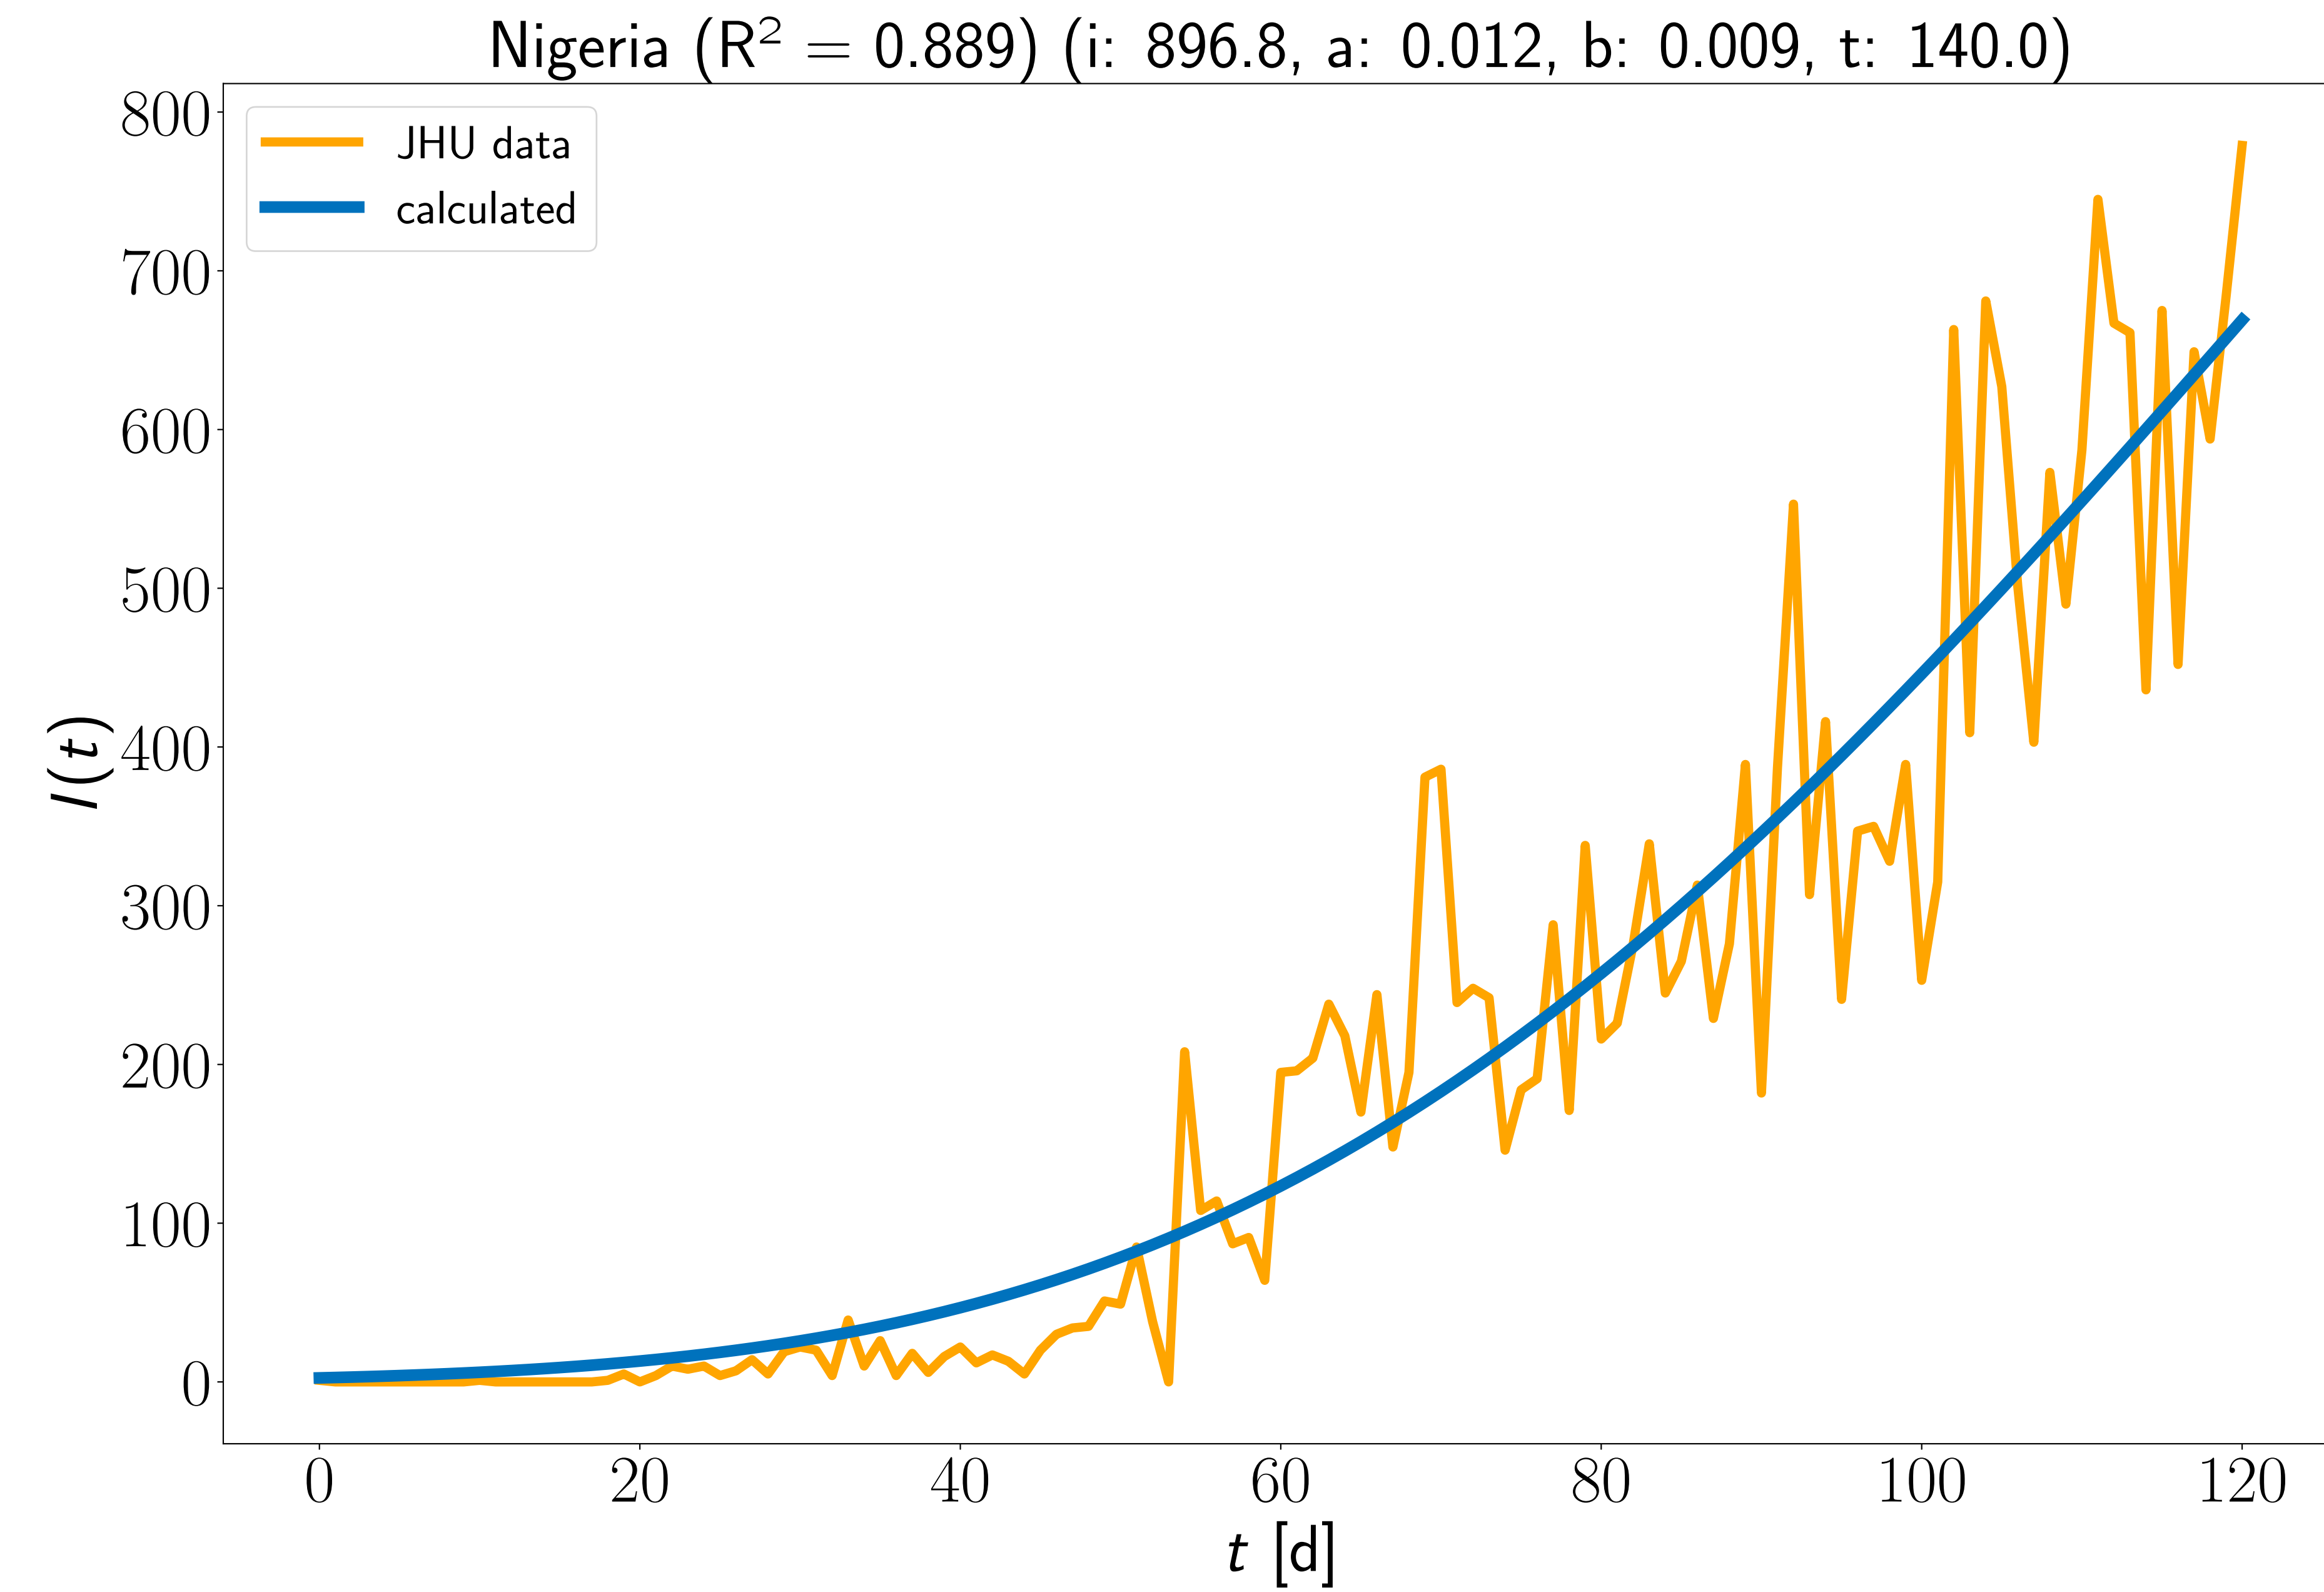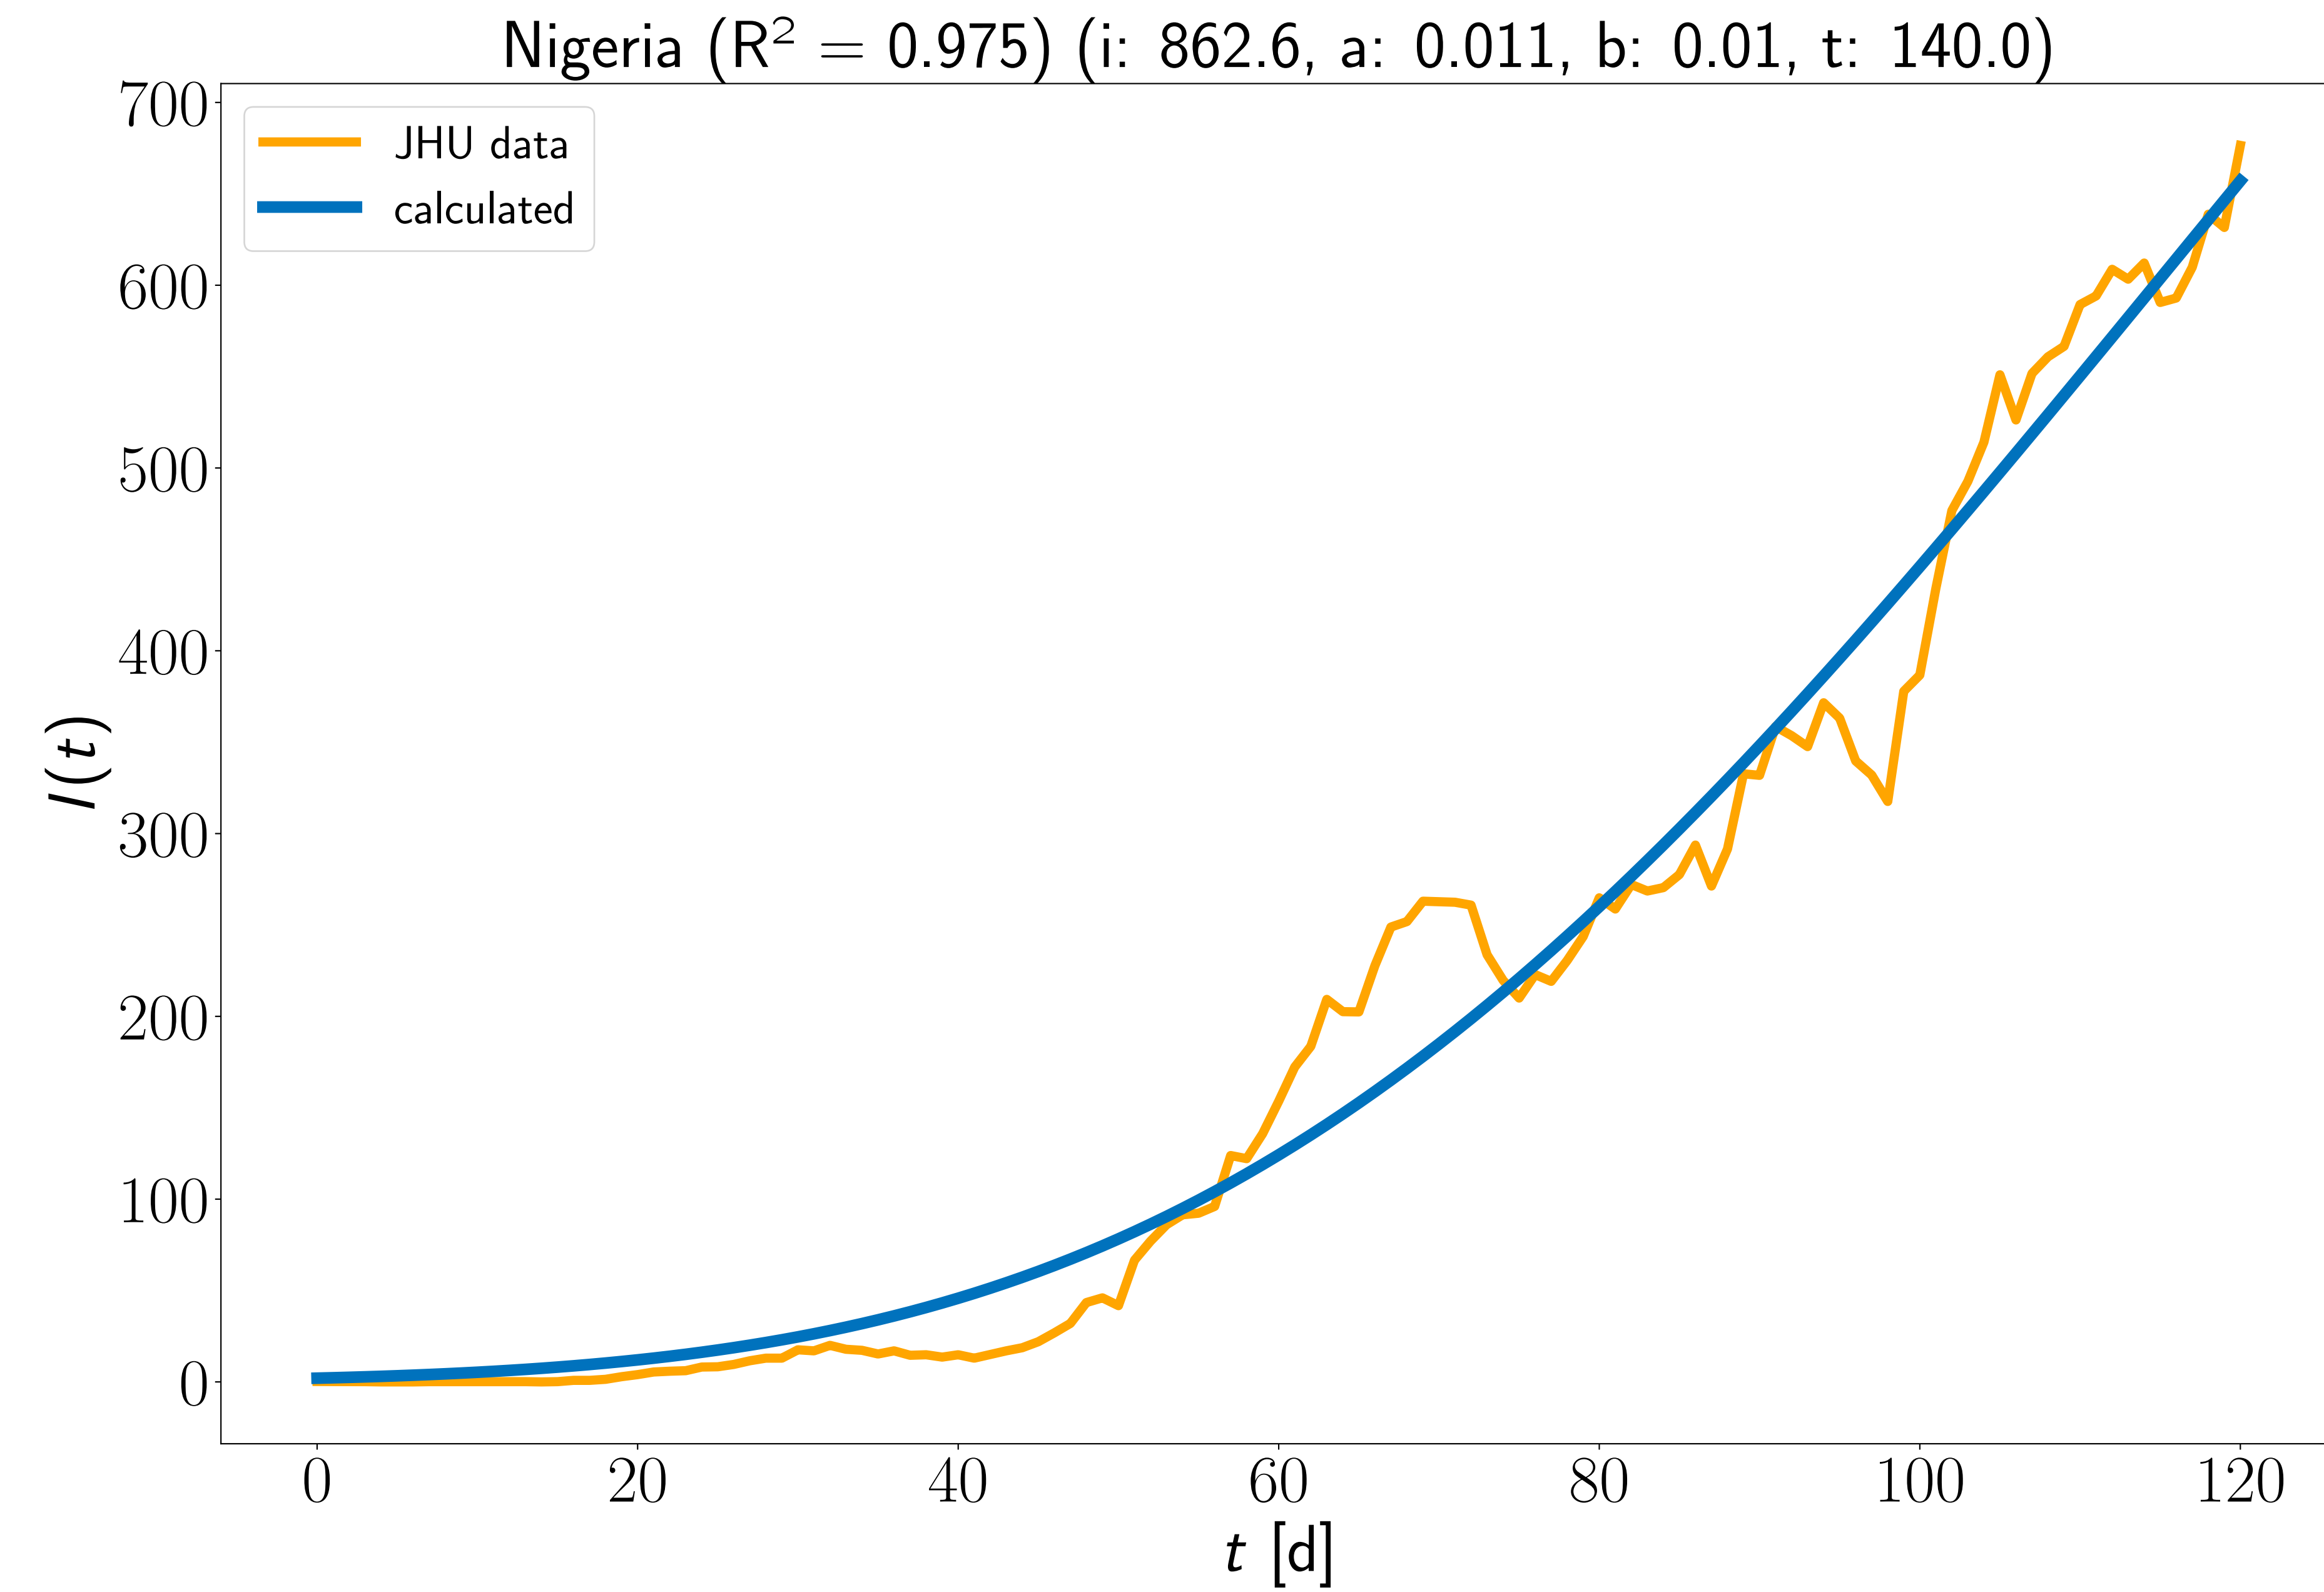

Oman ( $R^2 = 0.903$ ) (i: 0.1, a: 0.234, b: 0.009, t: 24.7)

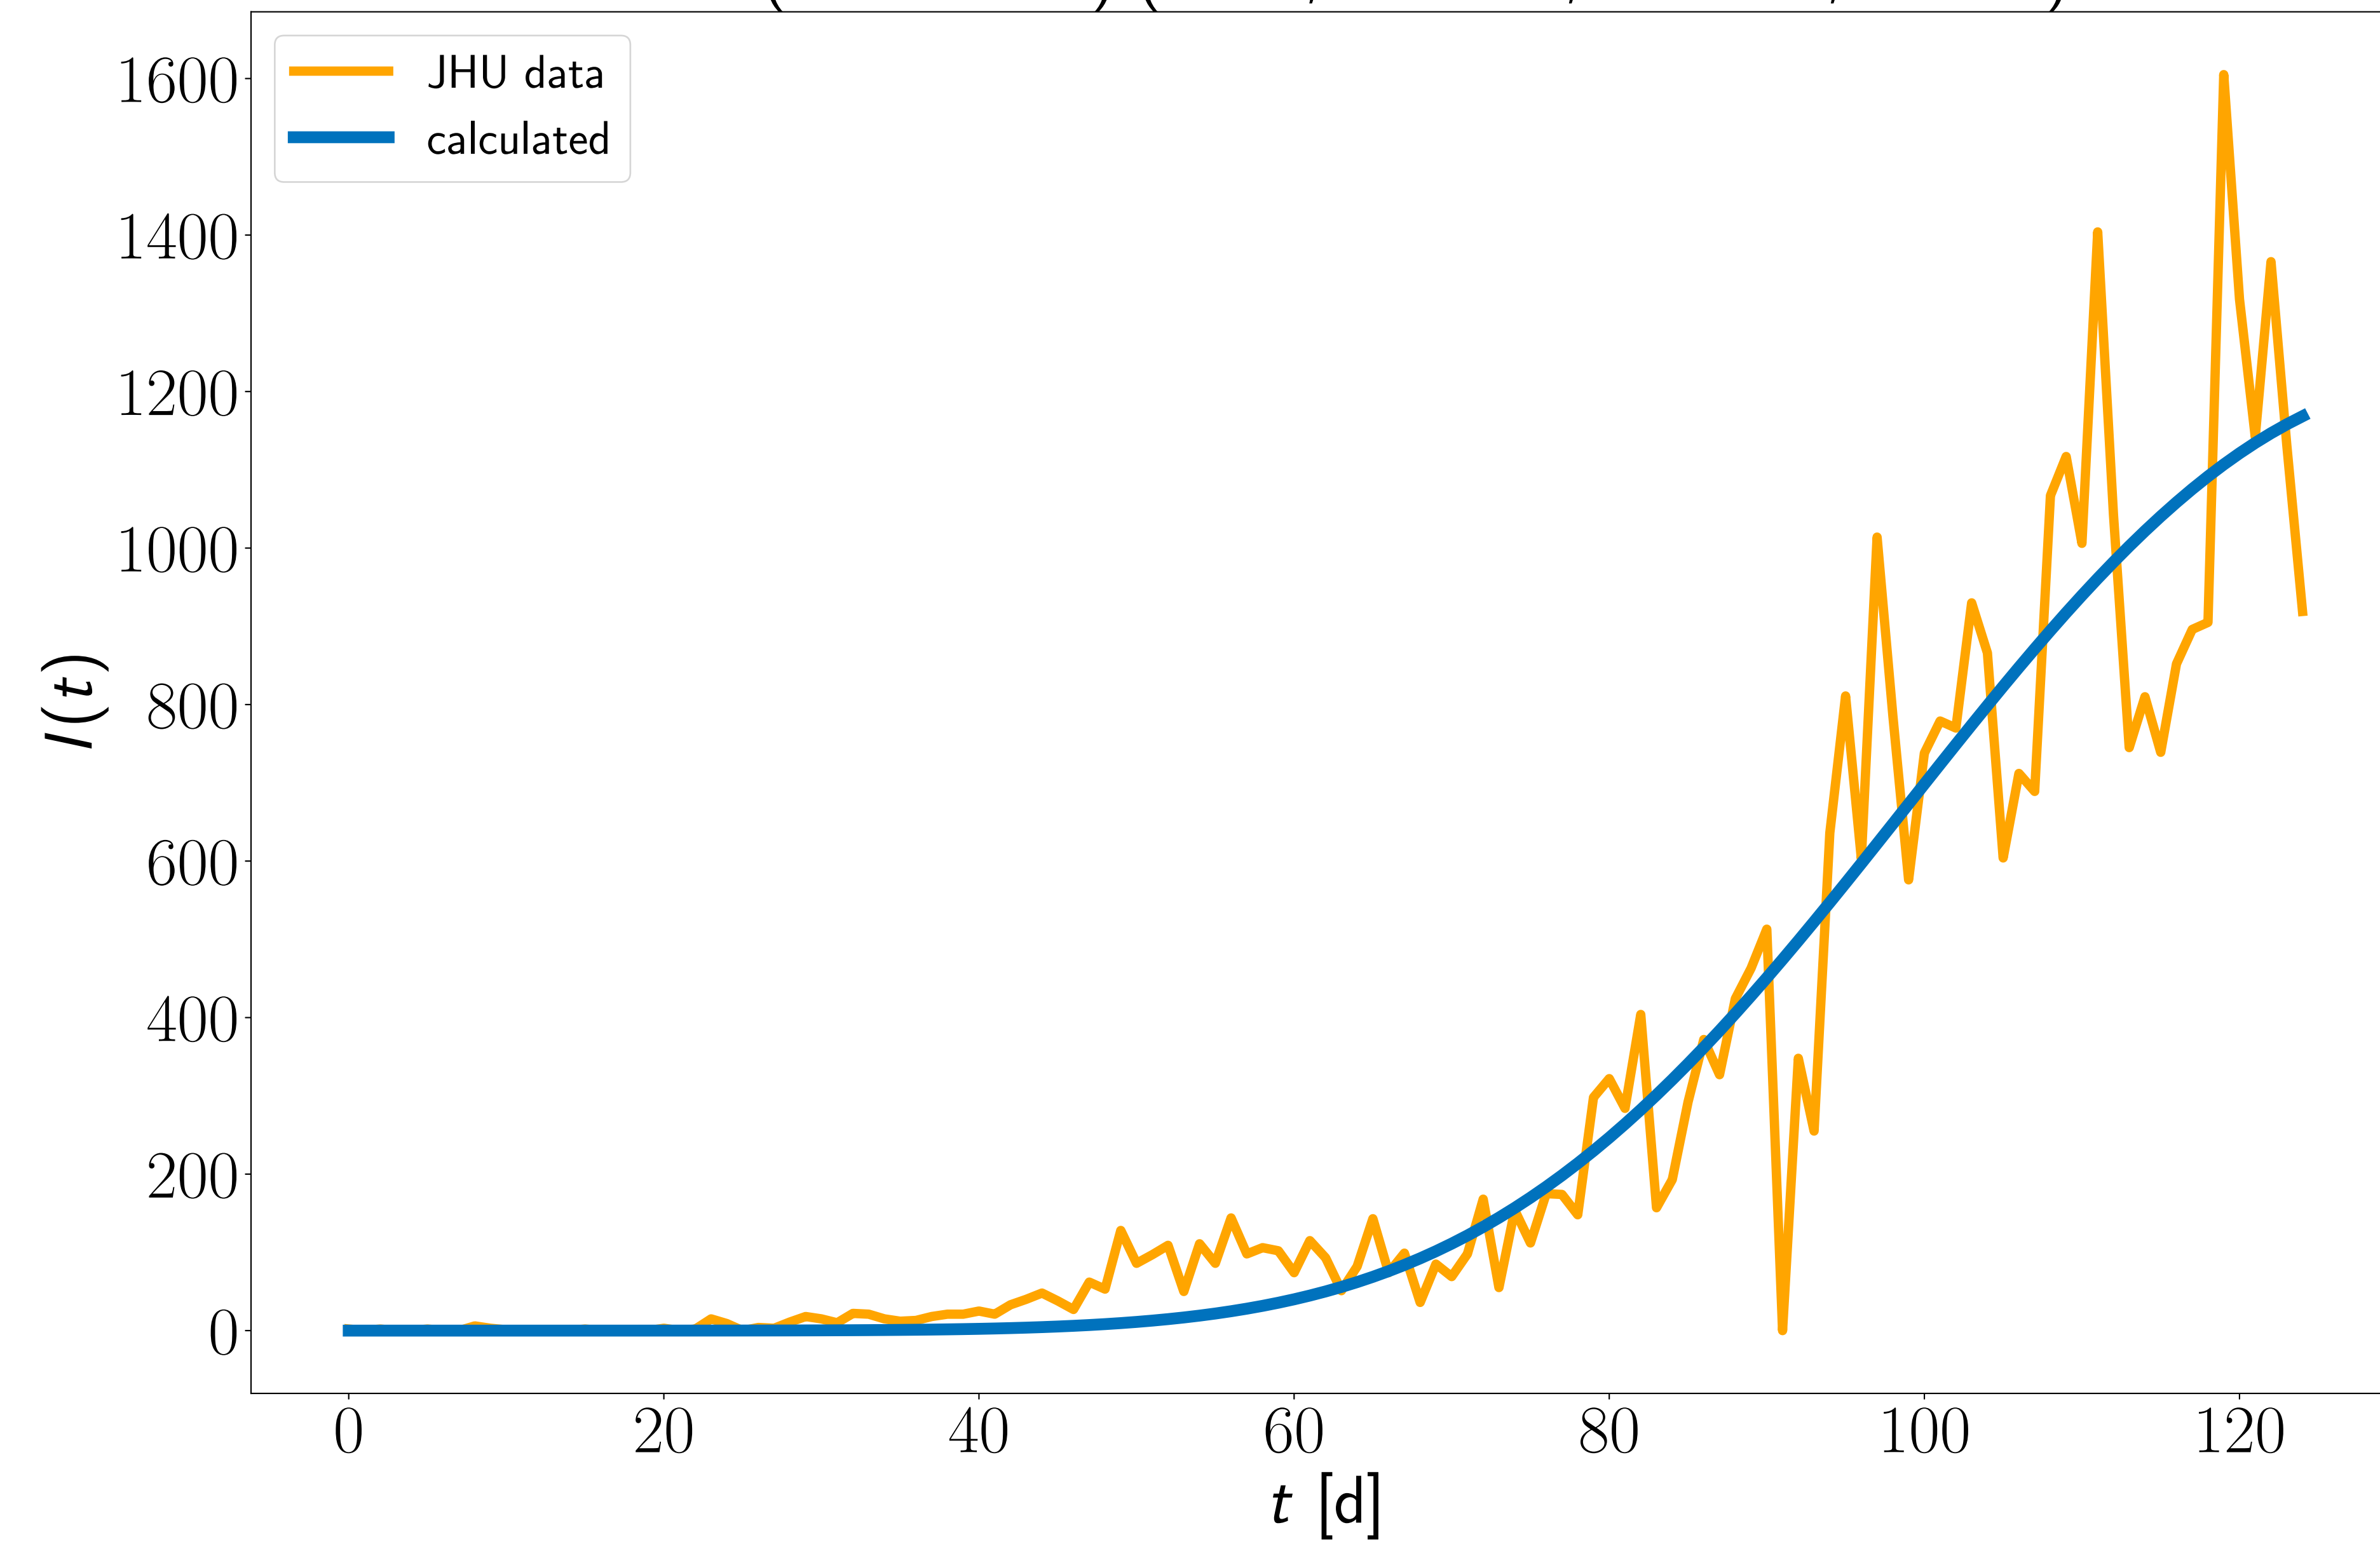

Oman ( $R^2 = 0.983$ ) (i: 0.1, a: 0.224, b: 0.009, t: 22.0)

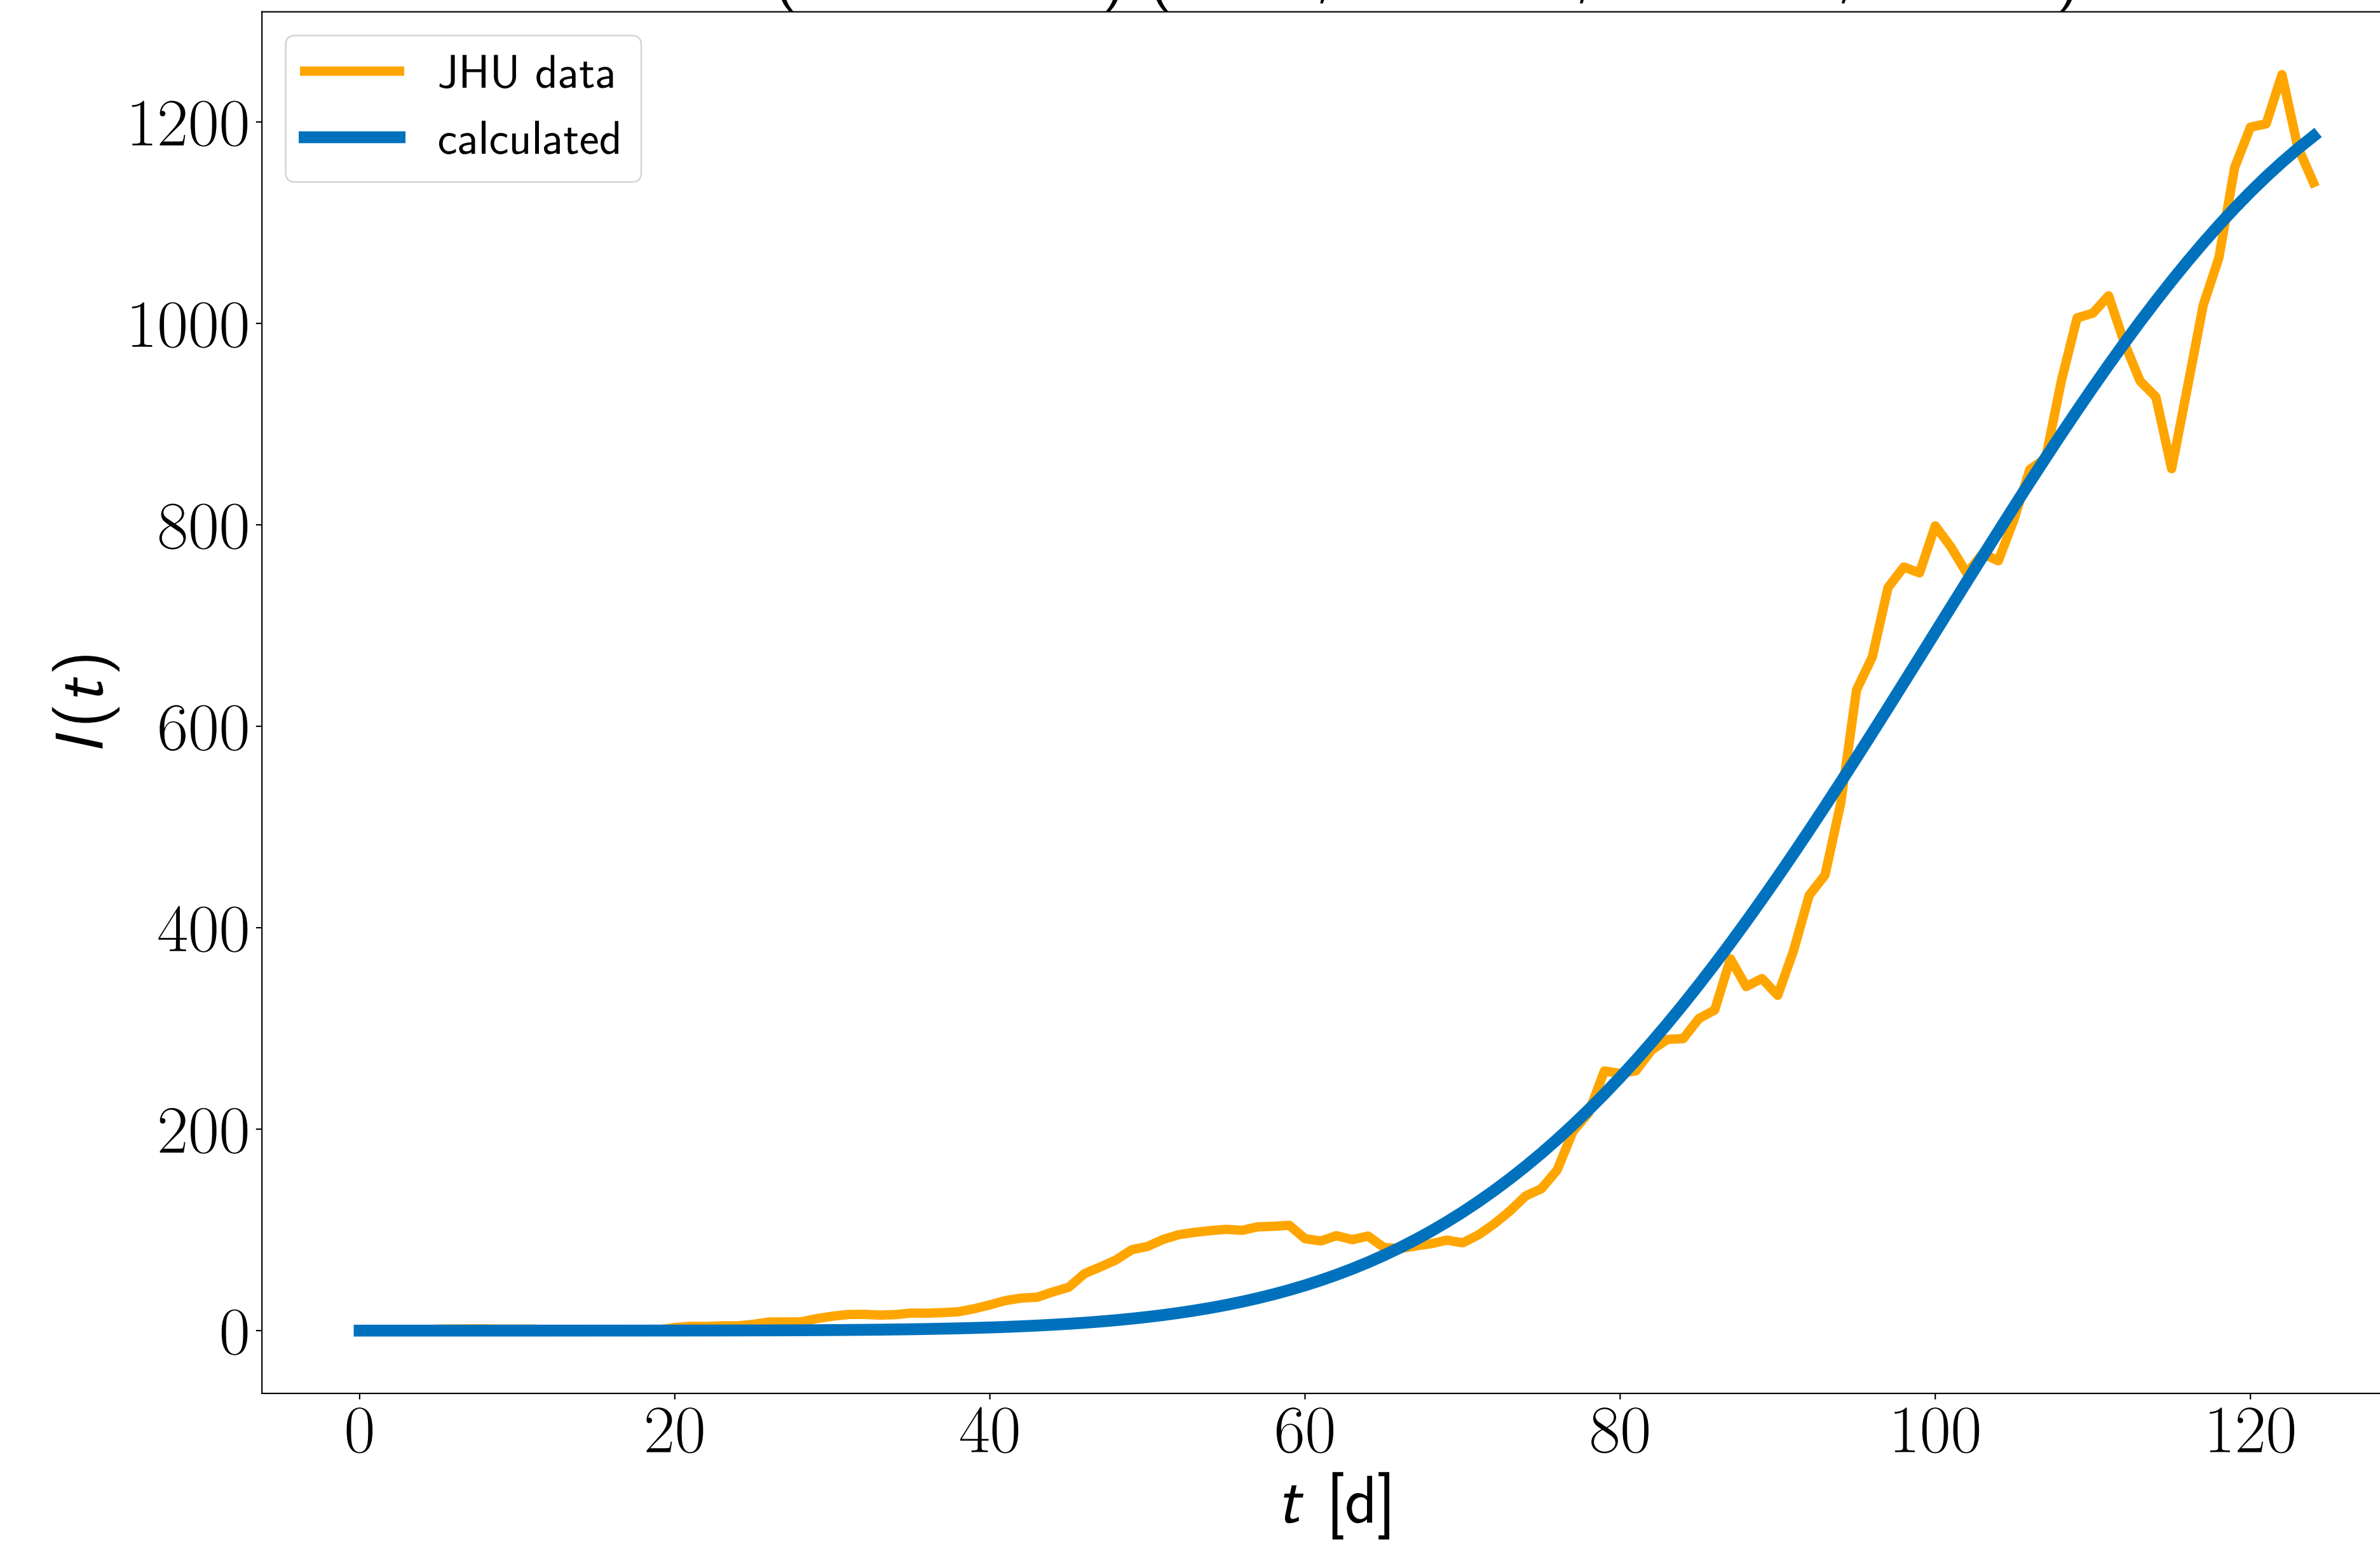

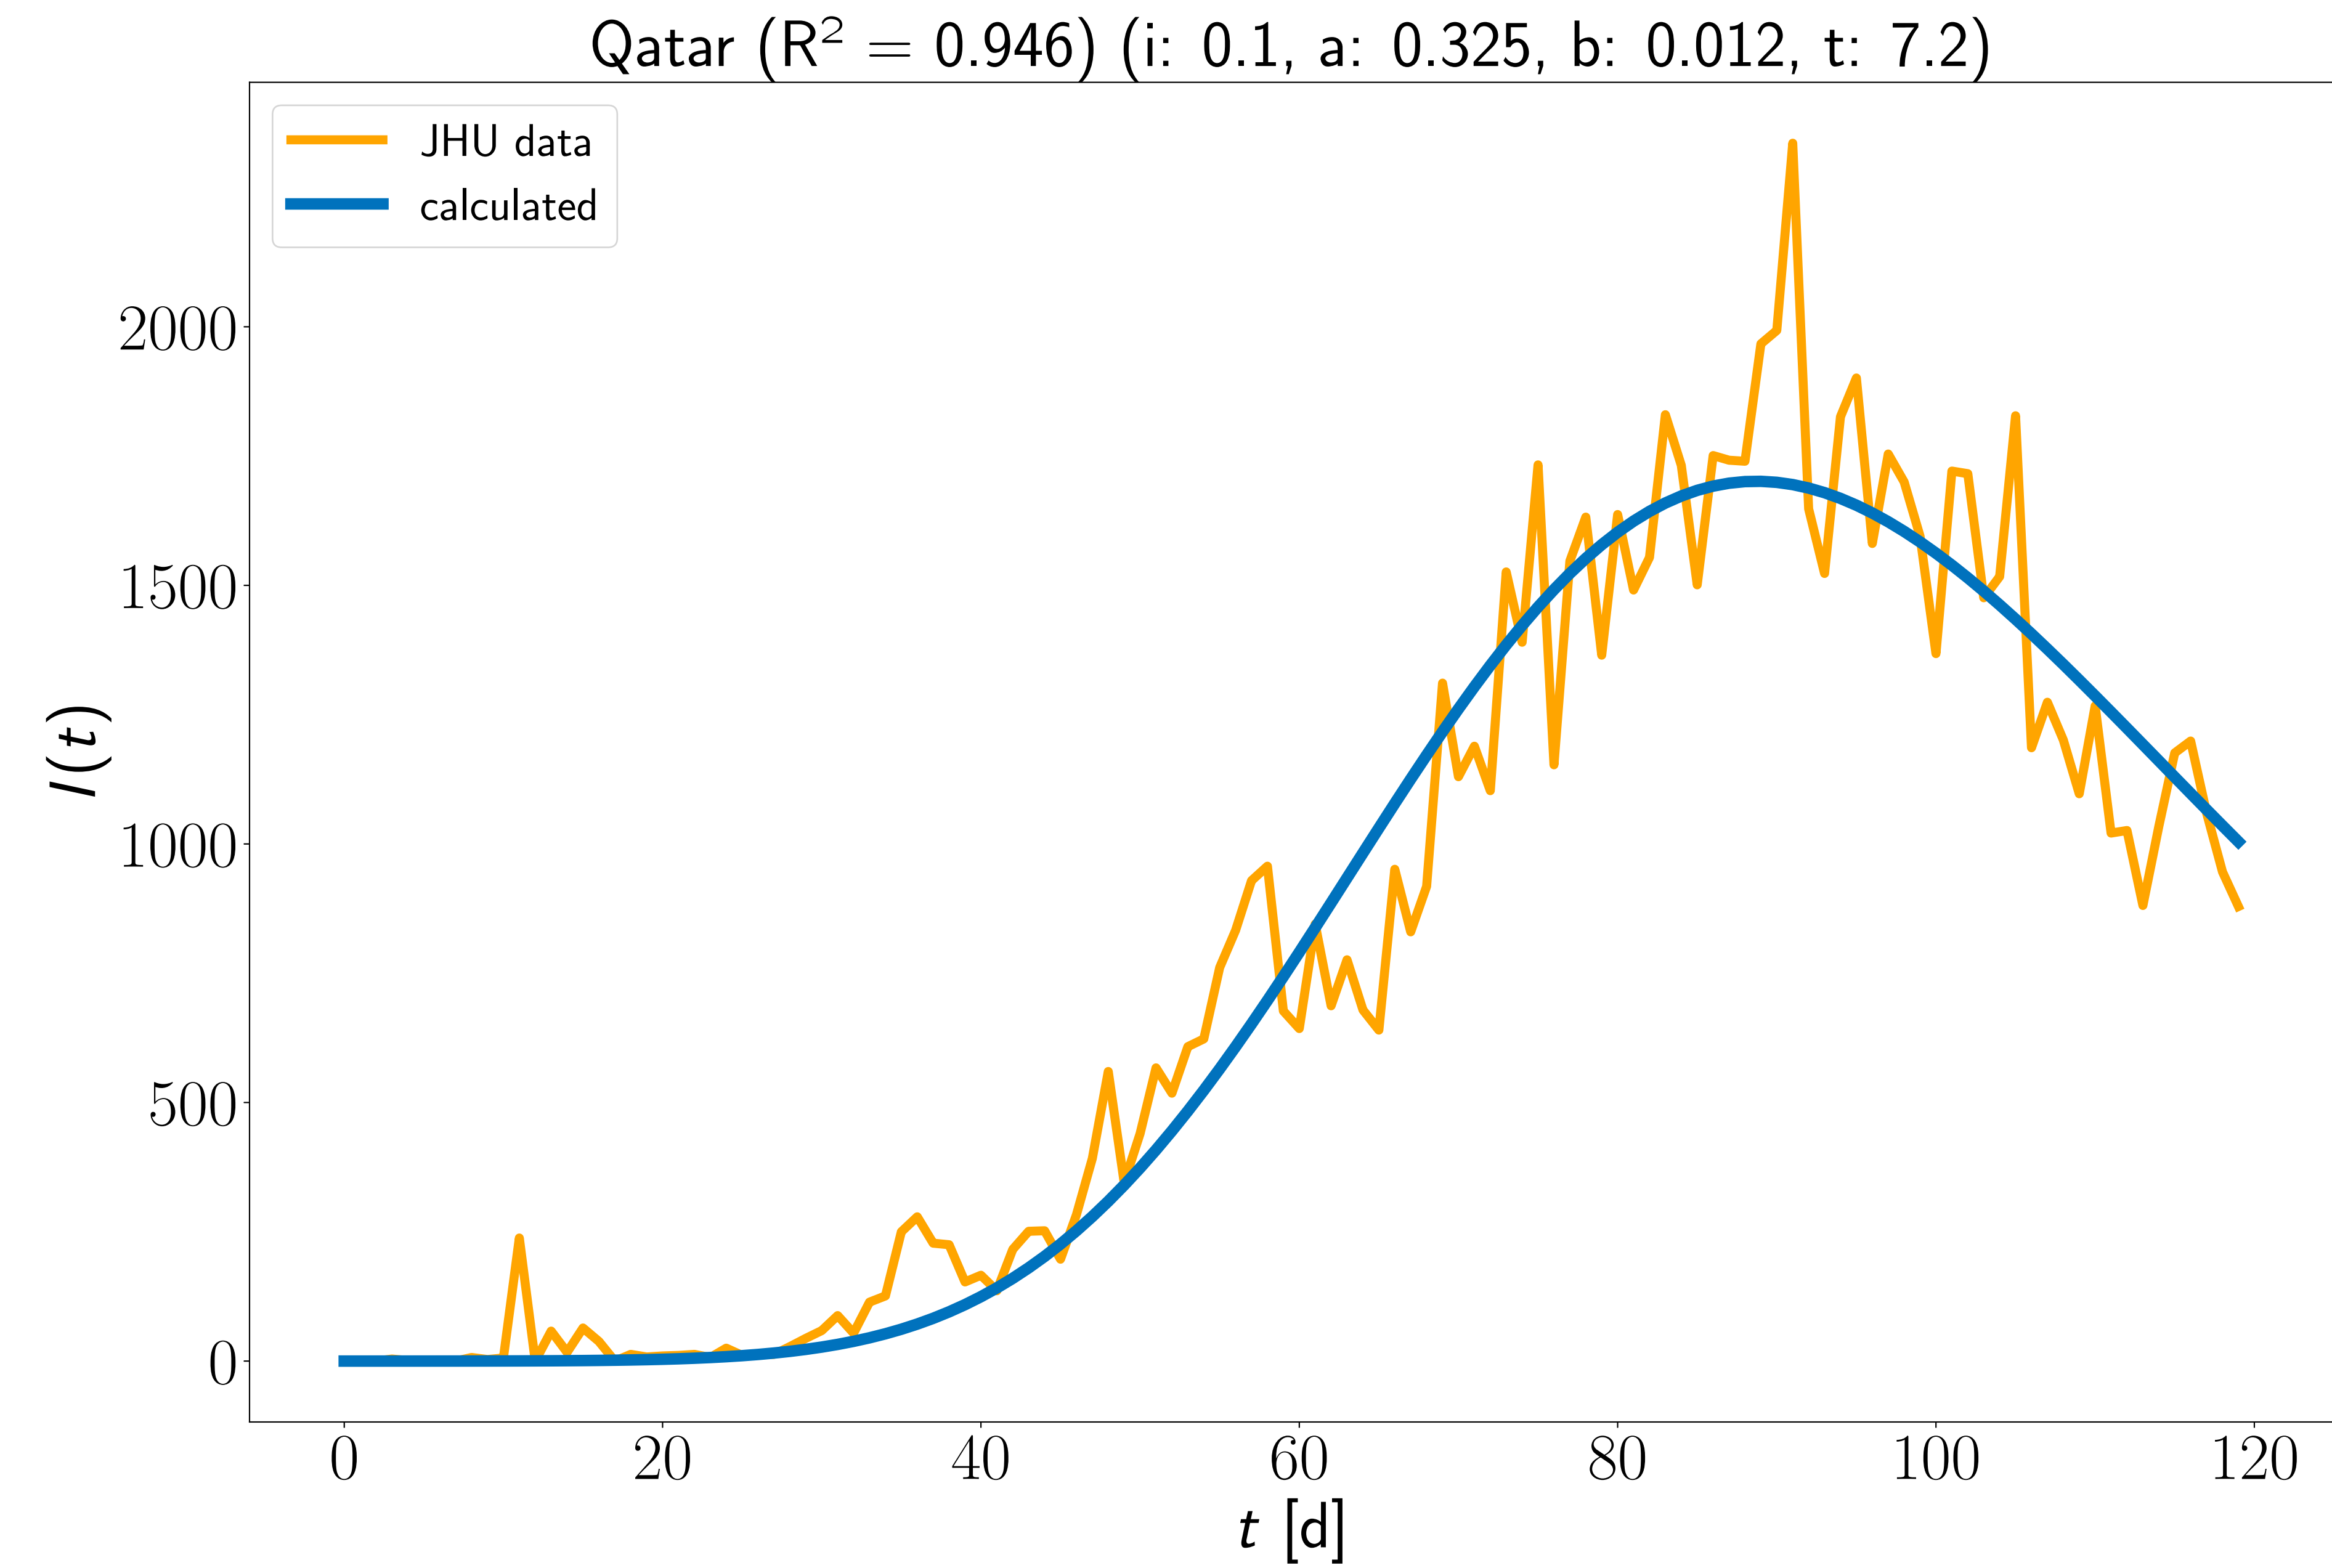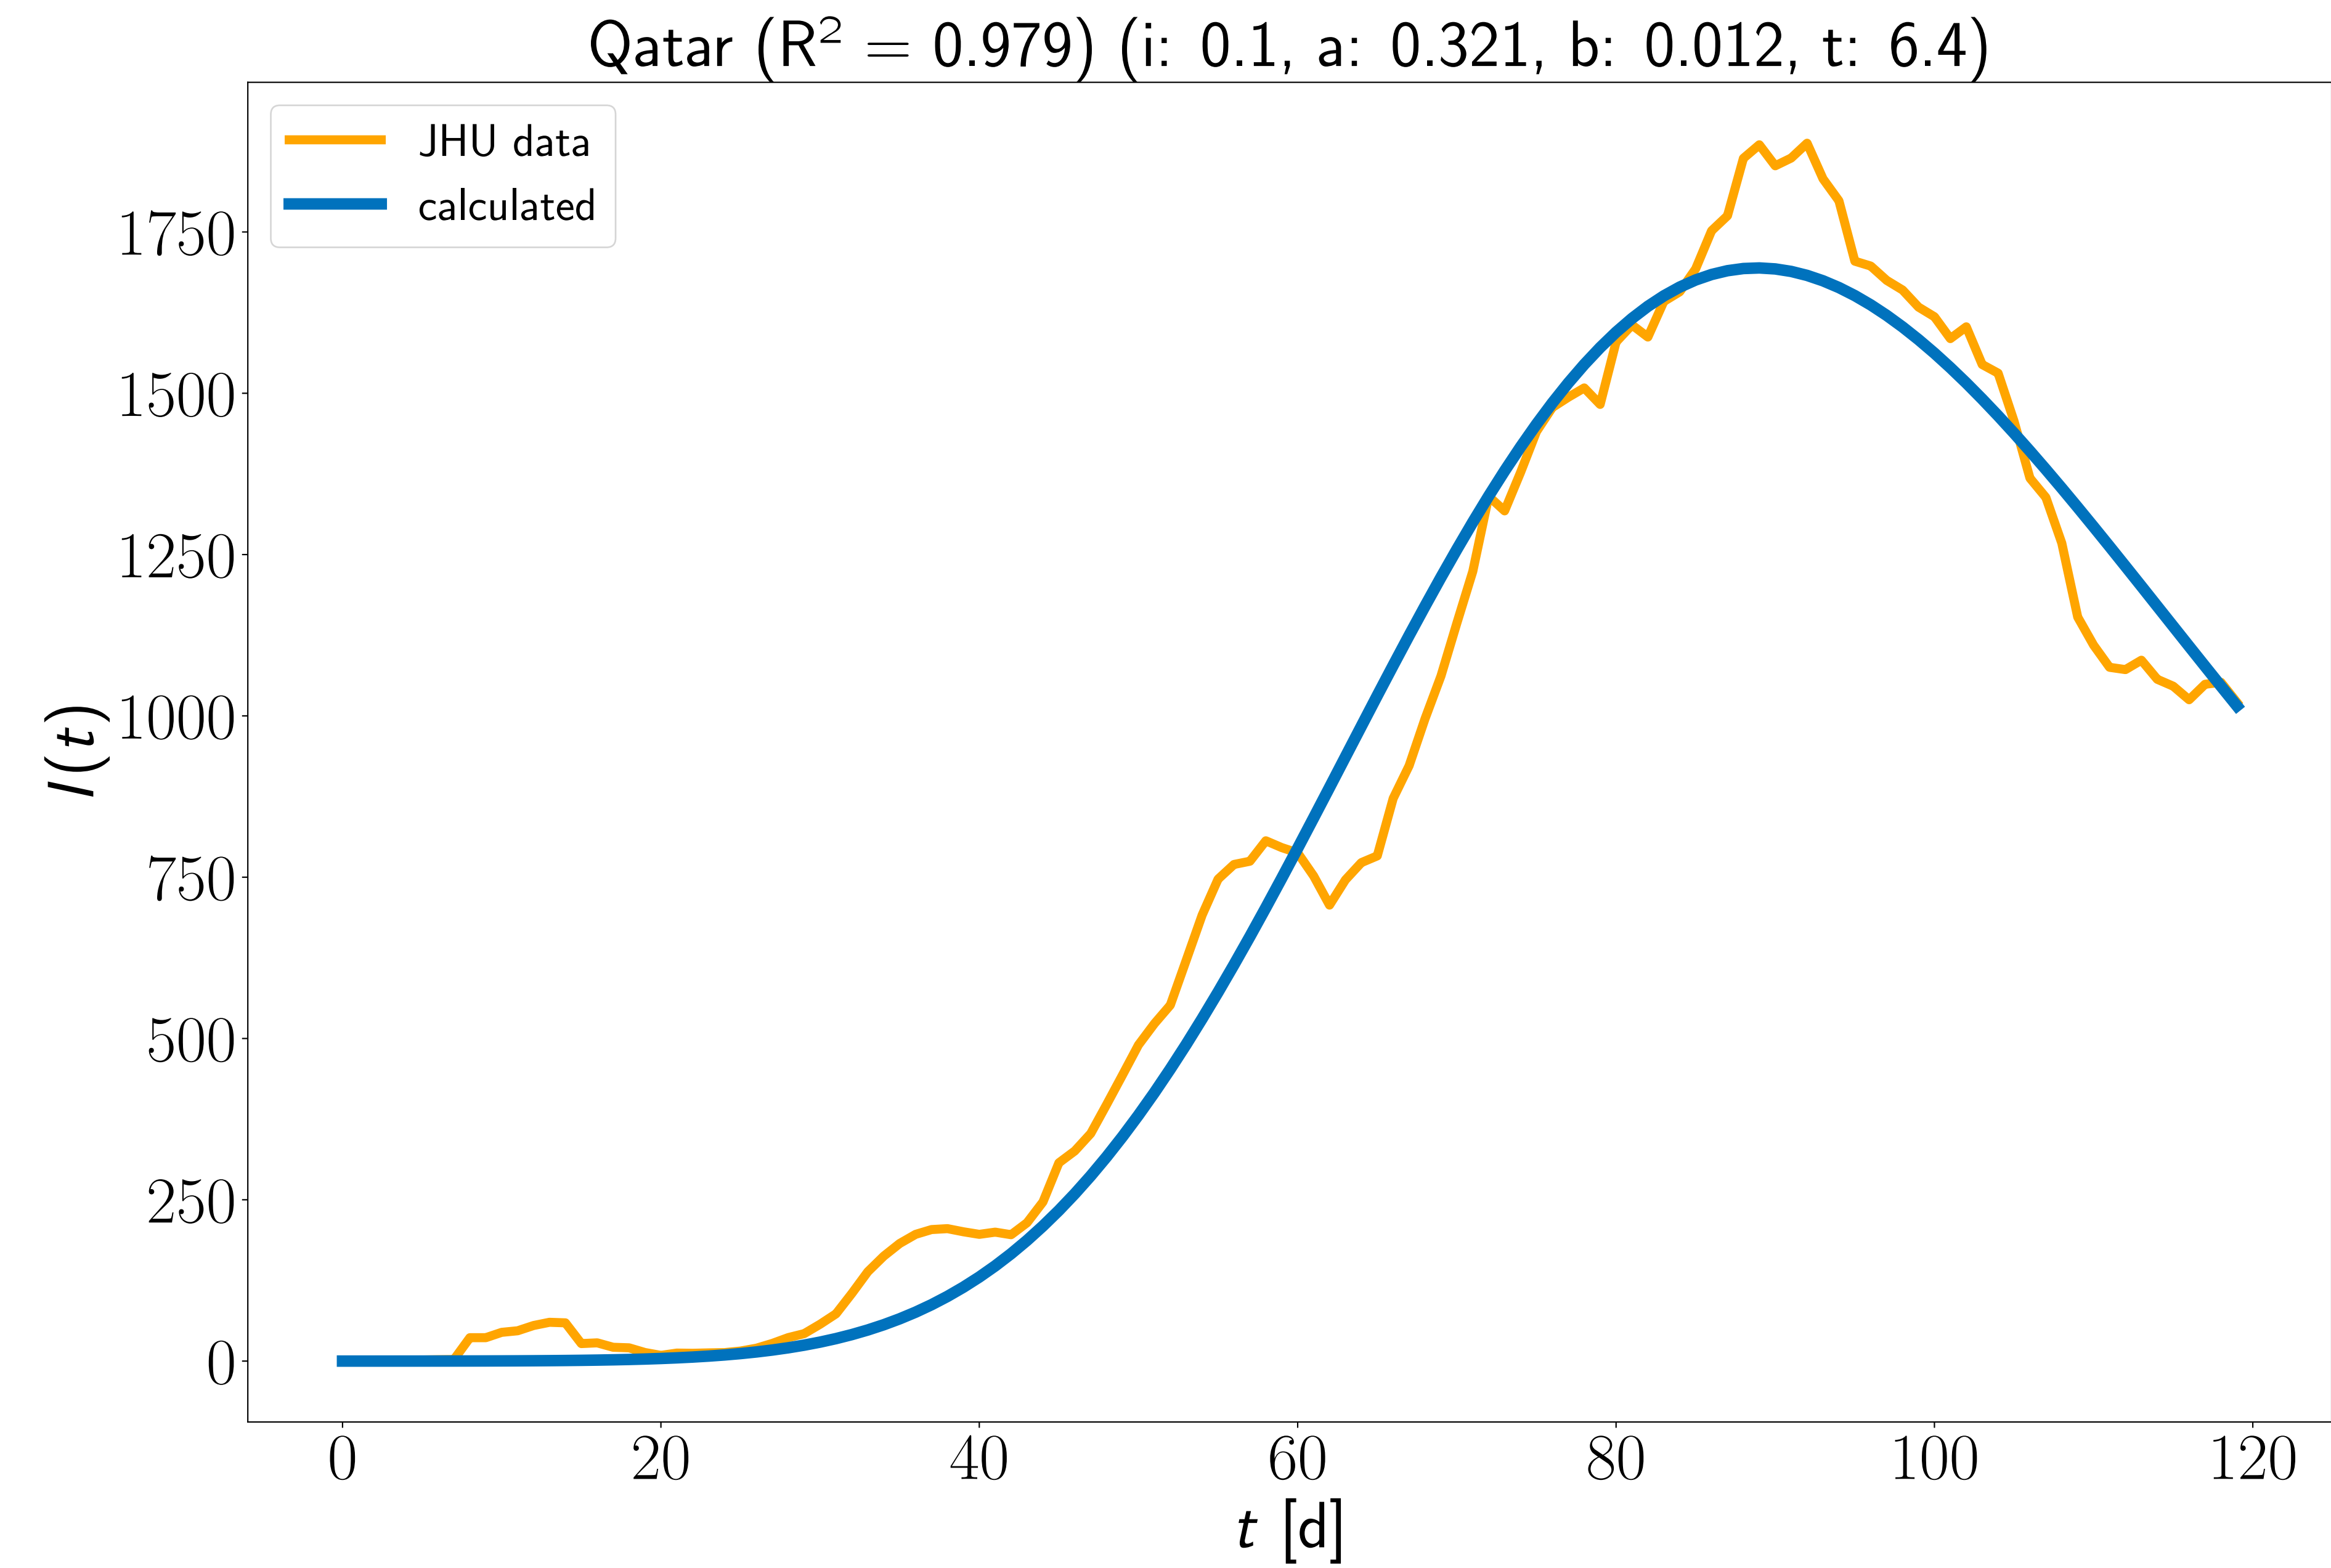

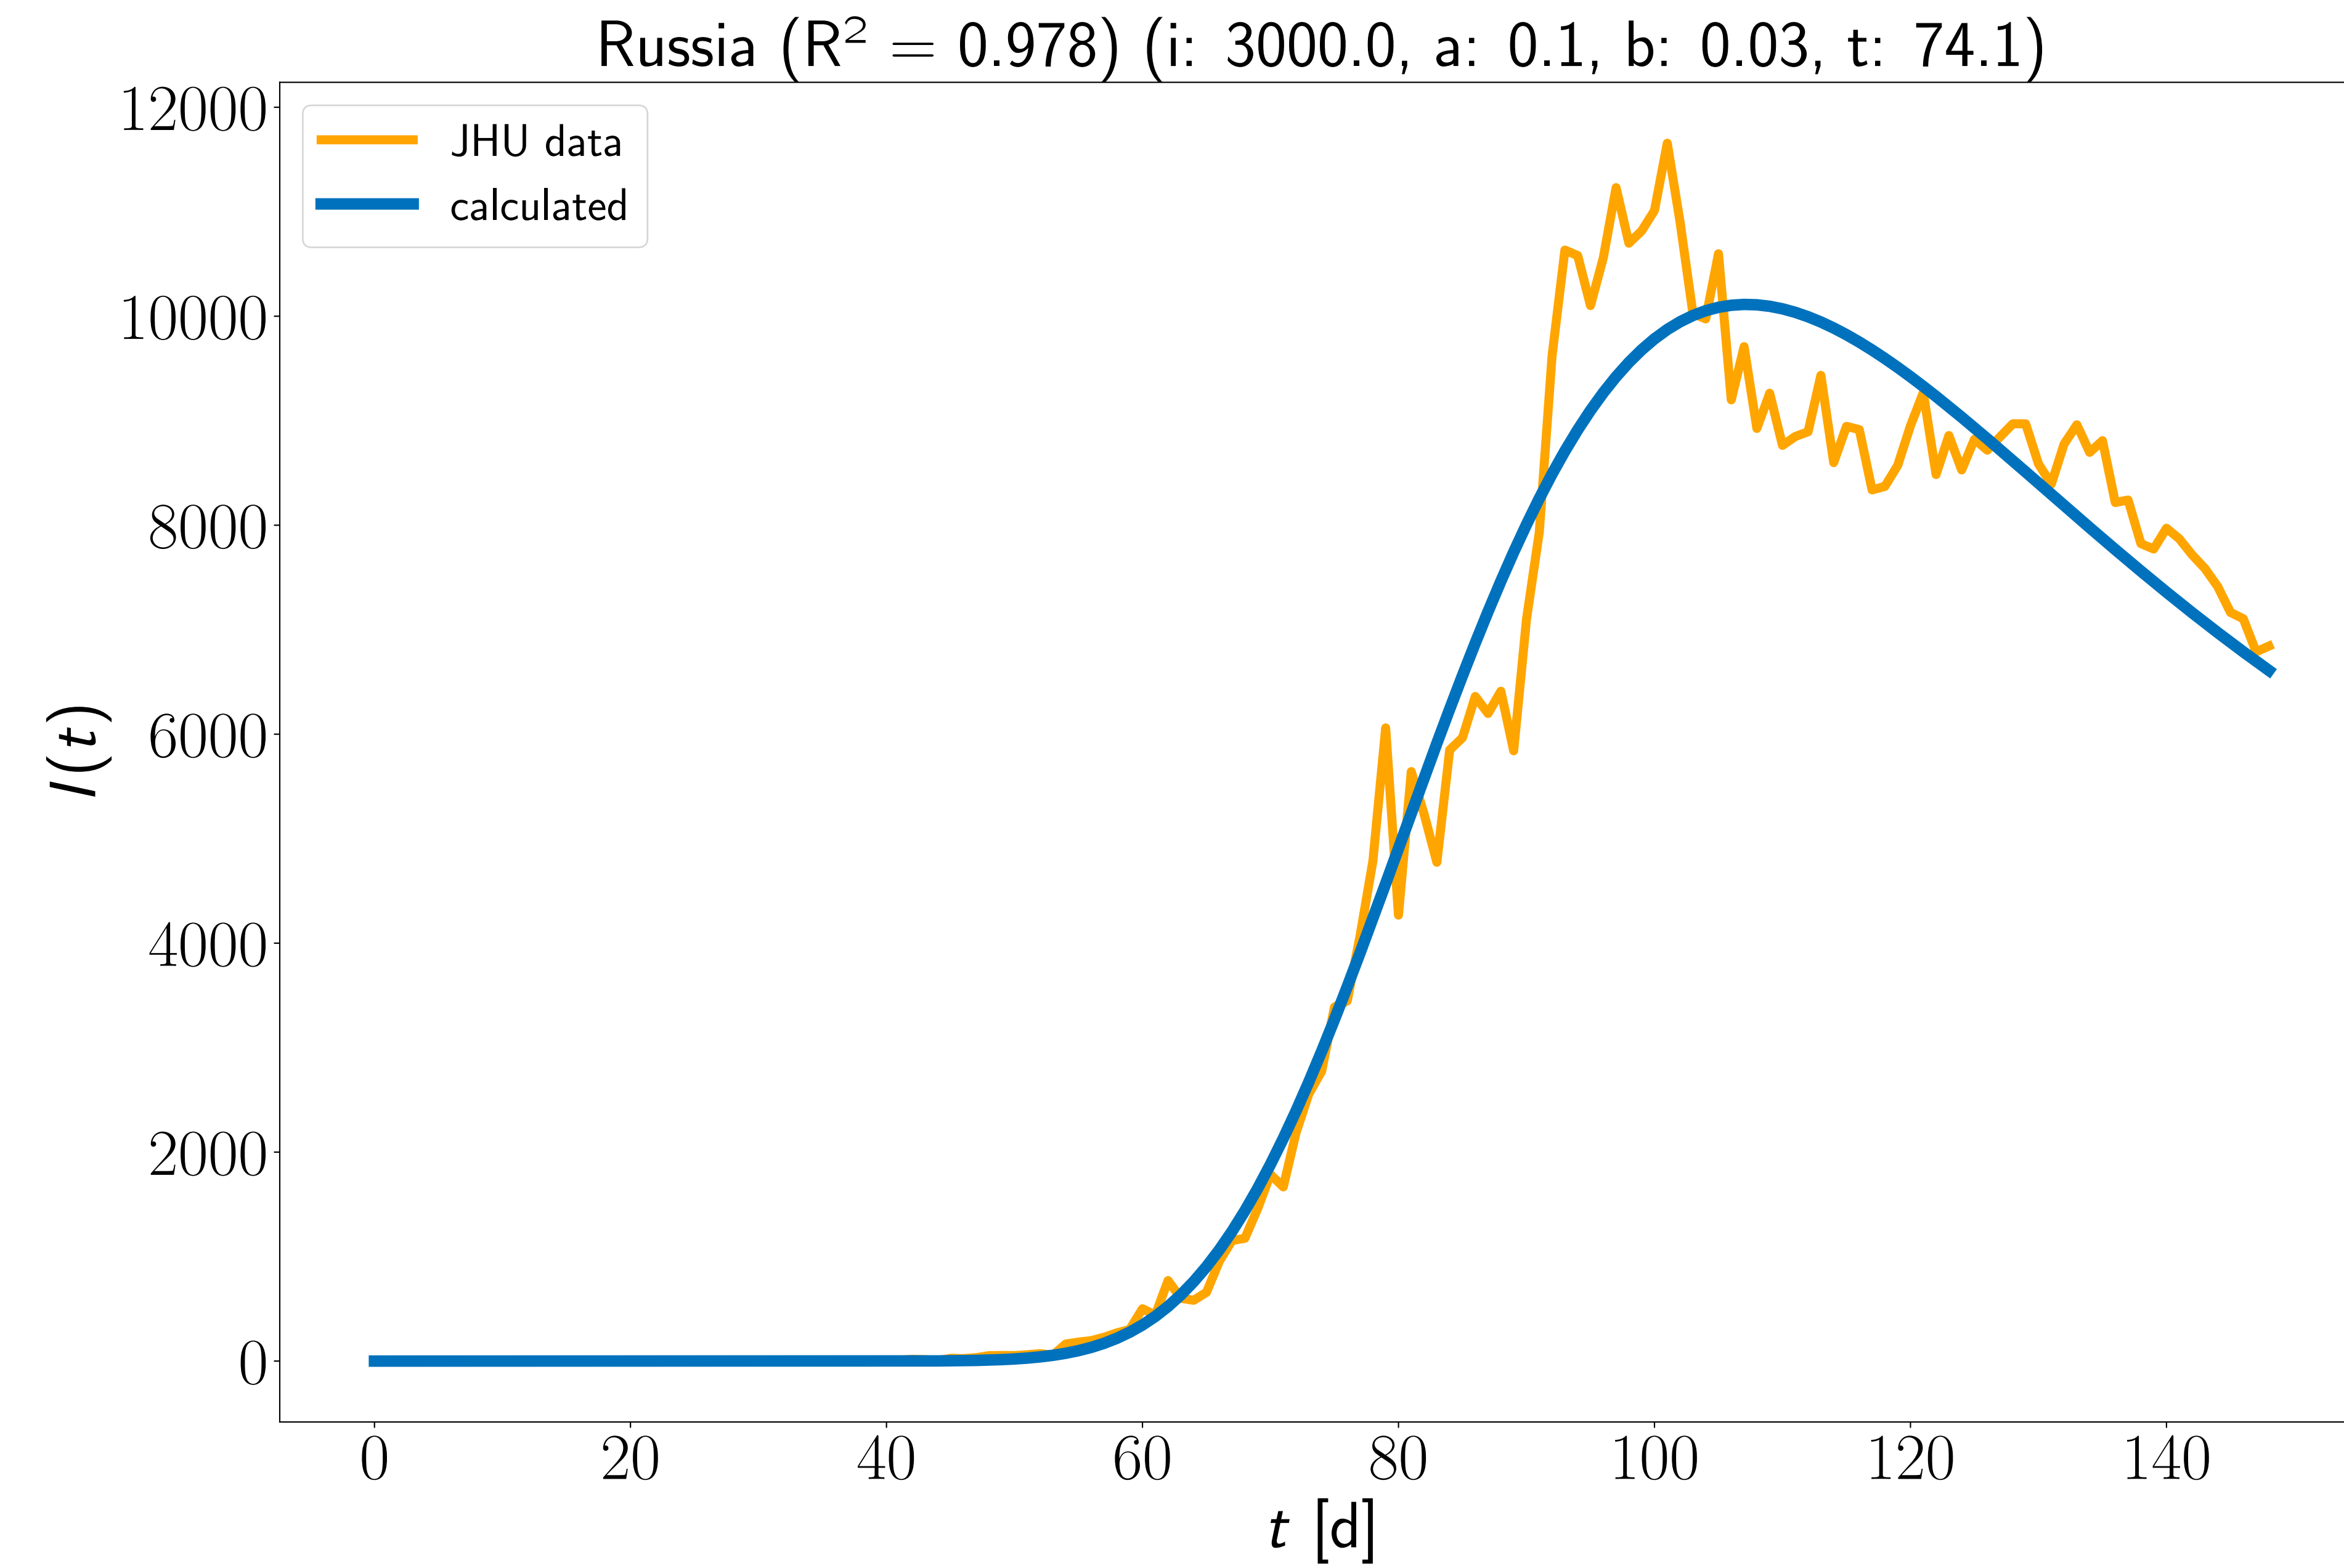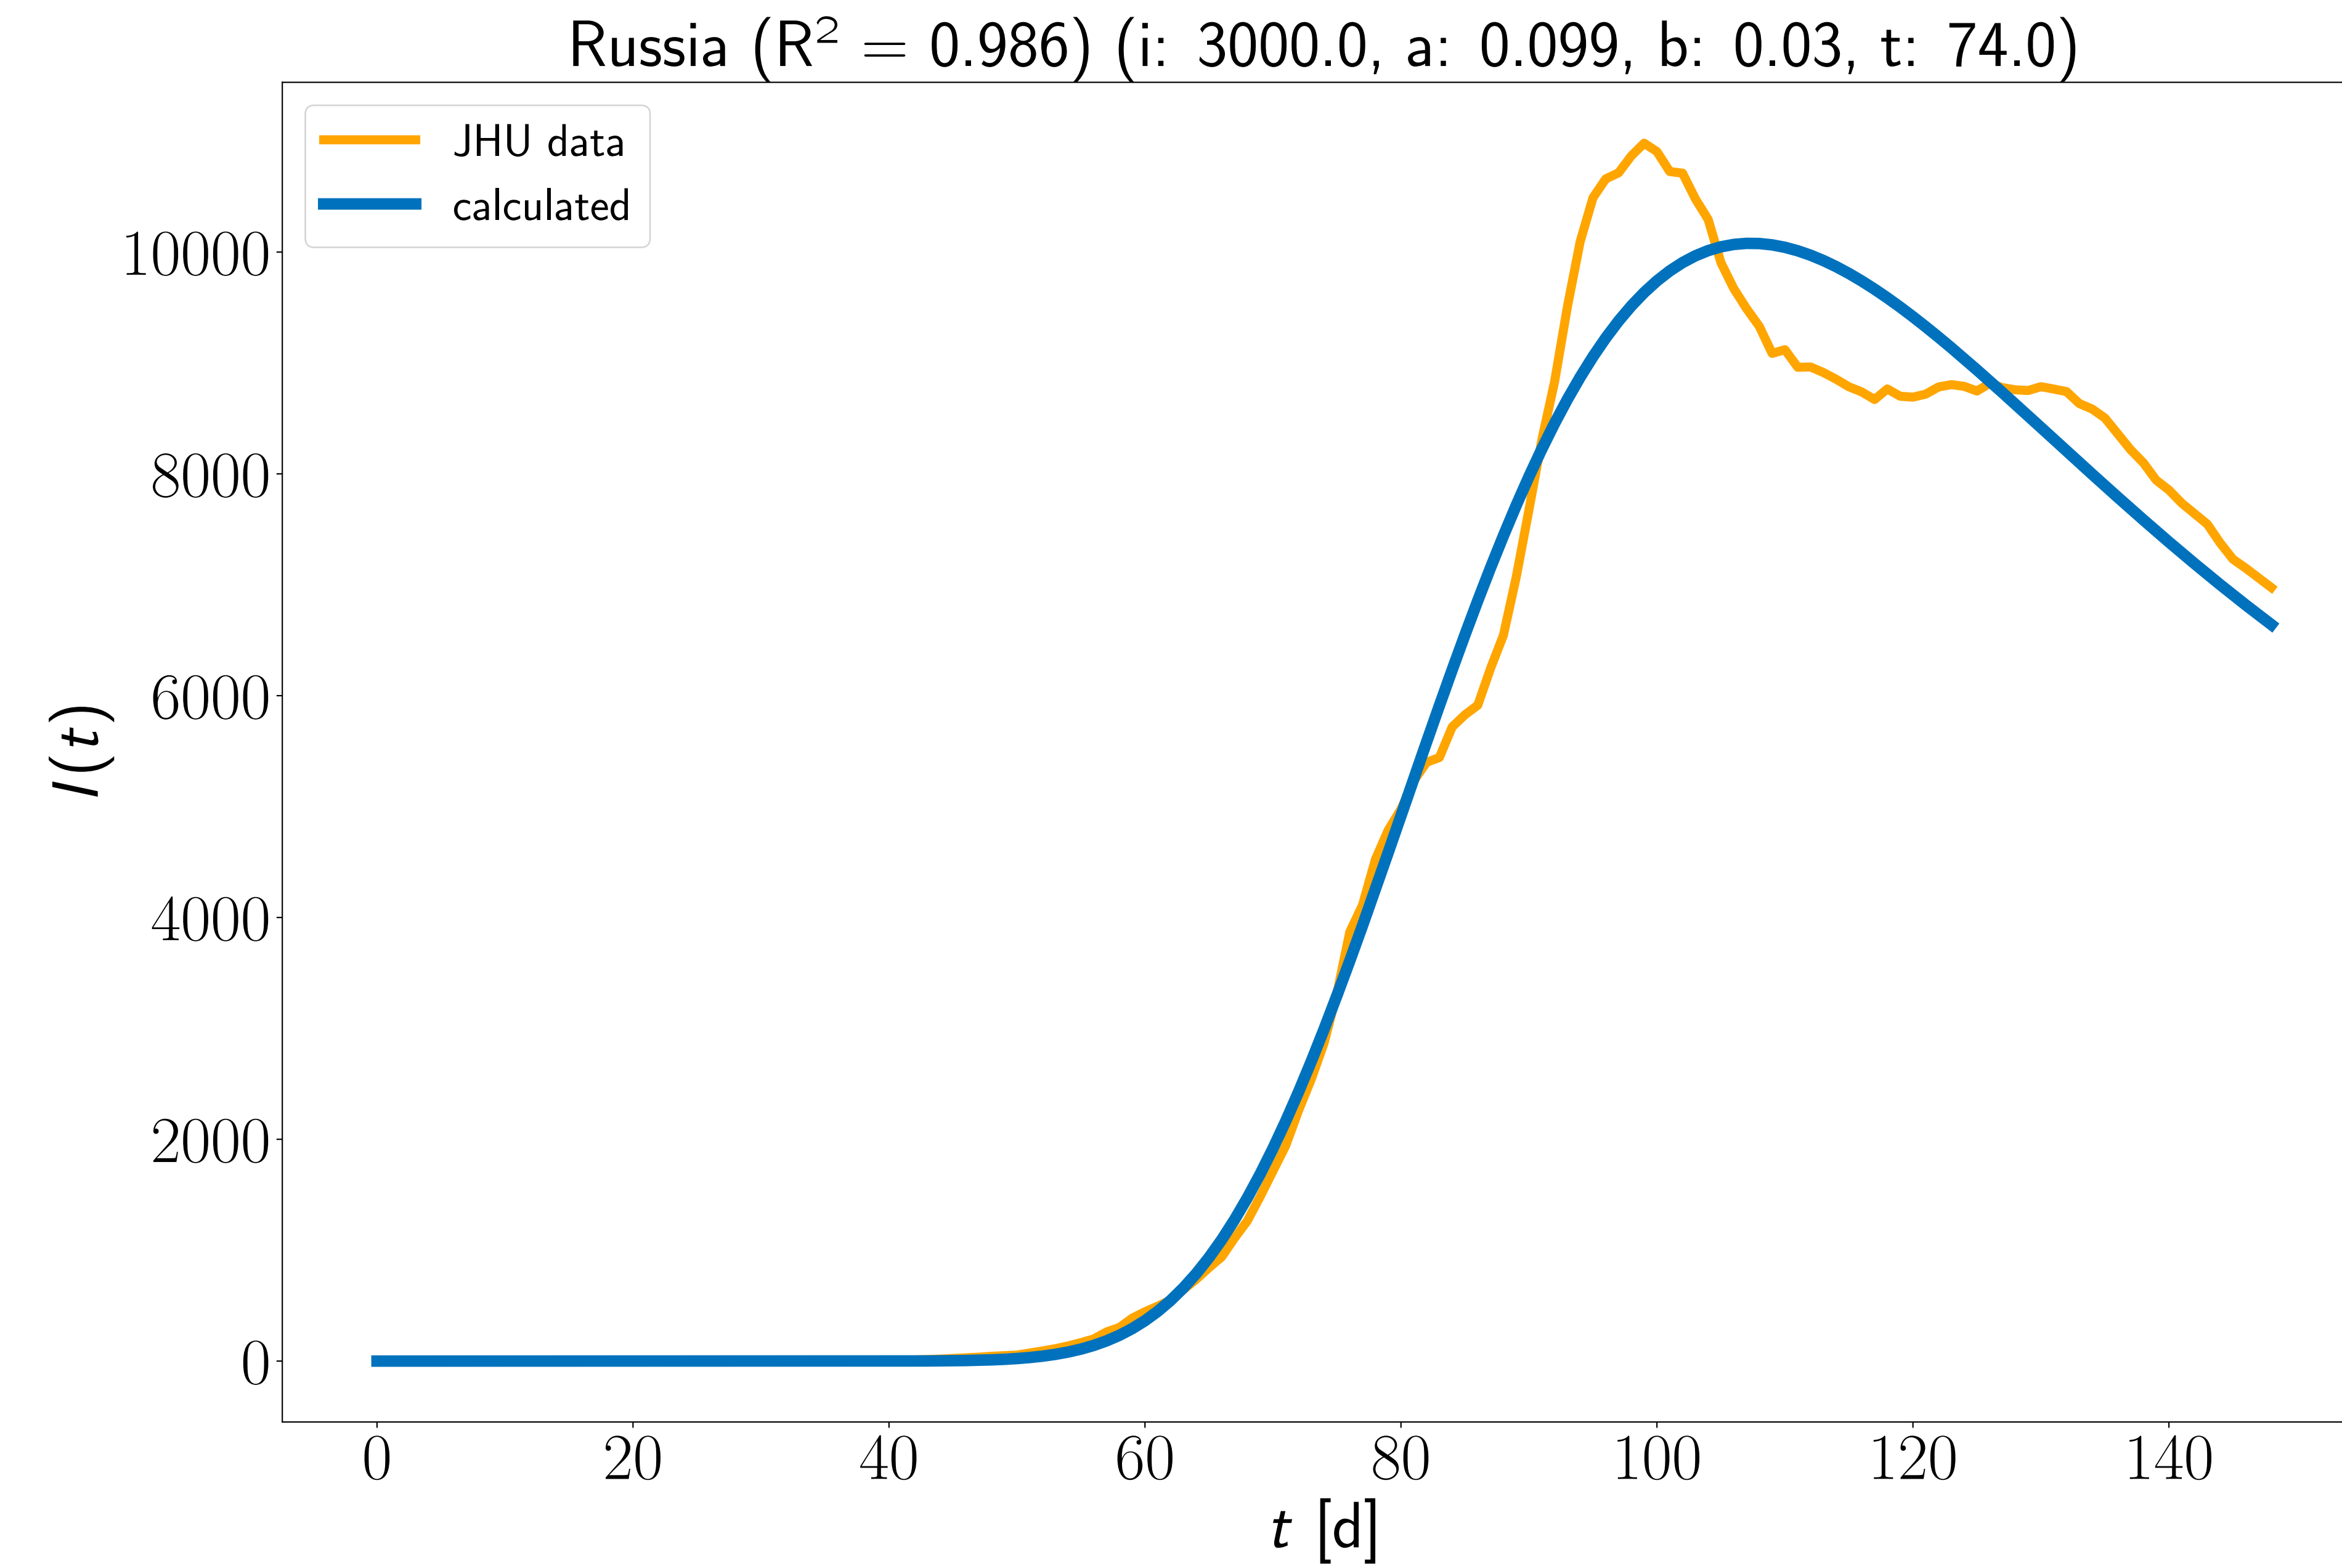

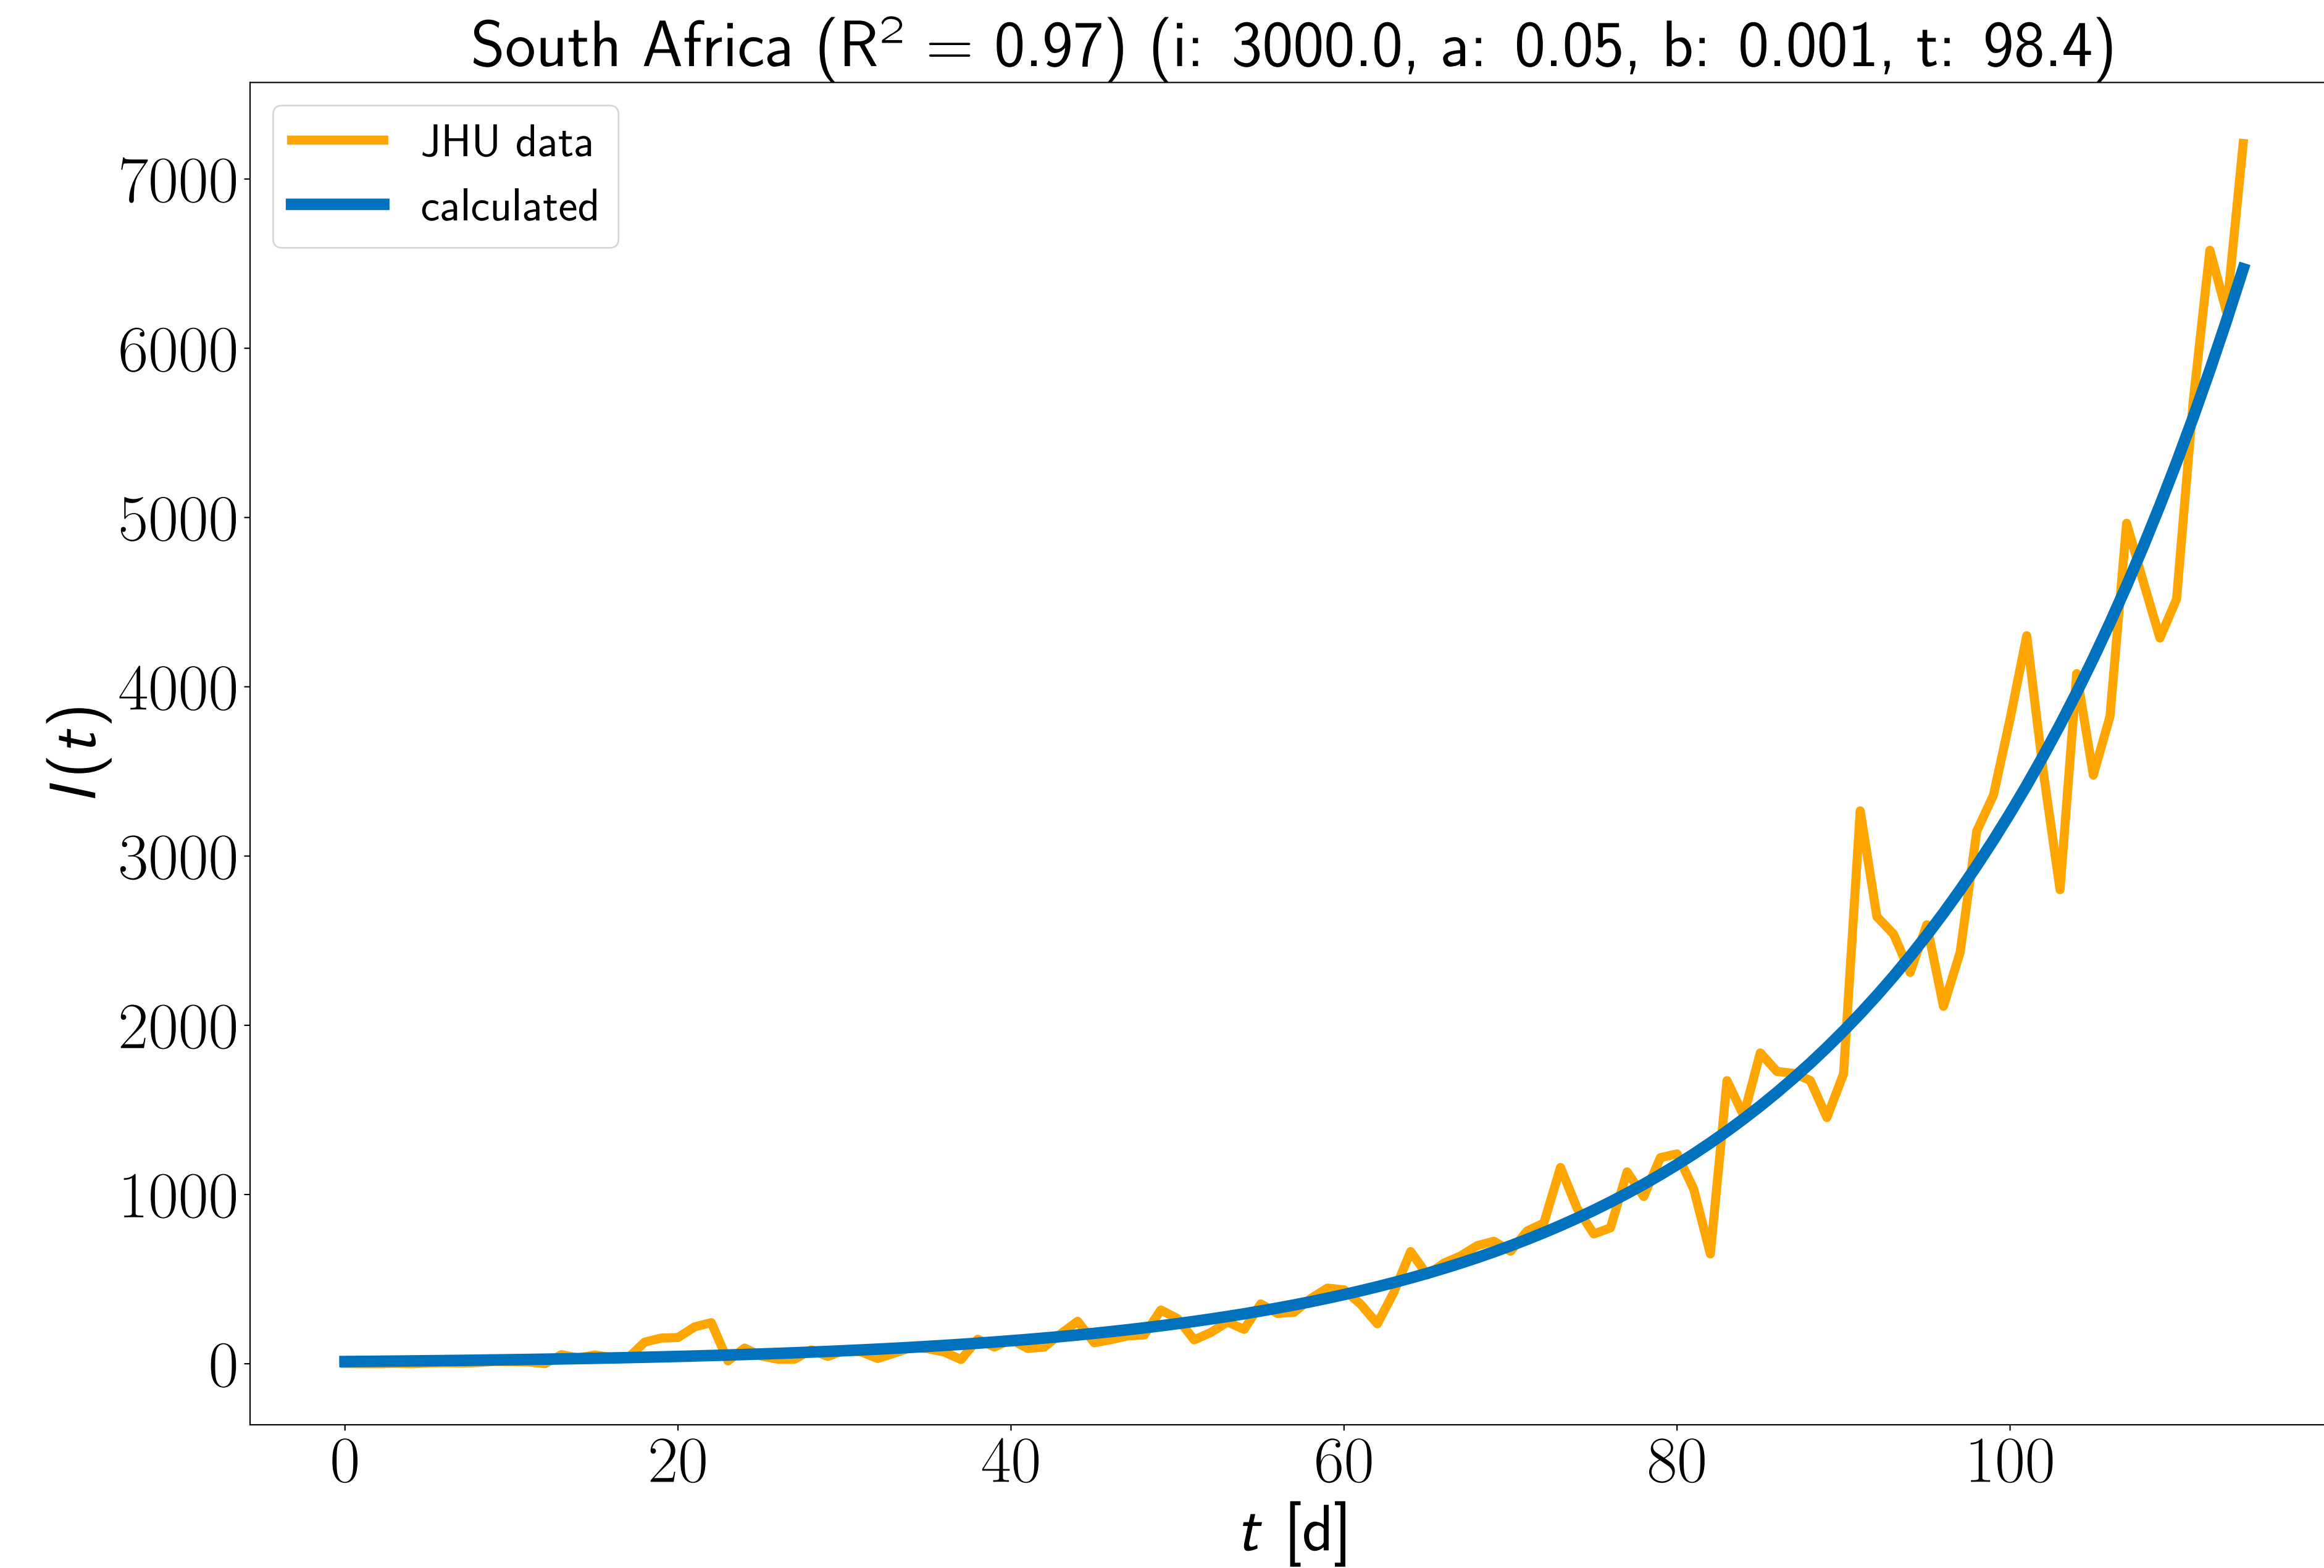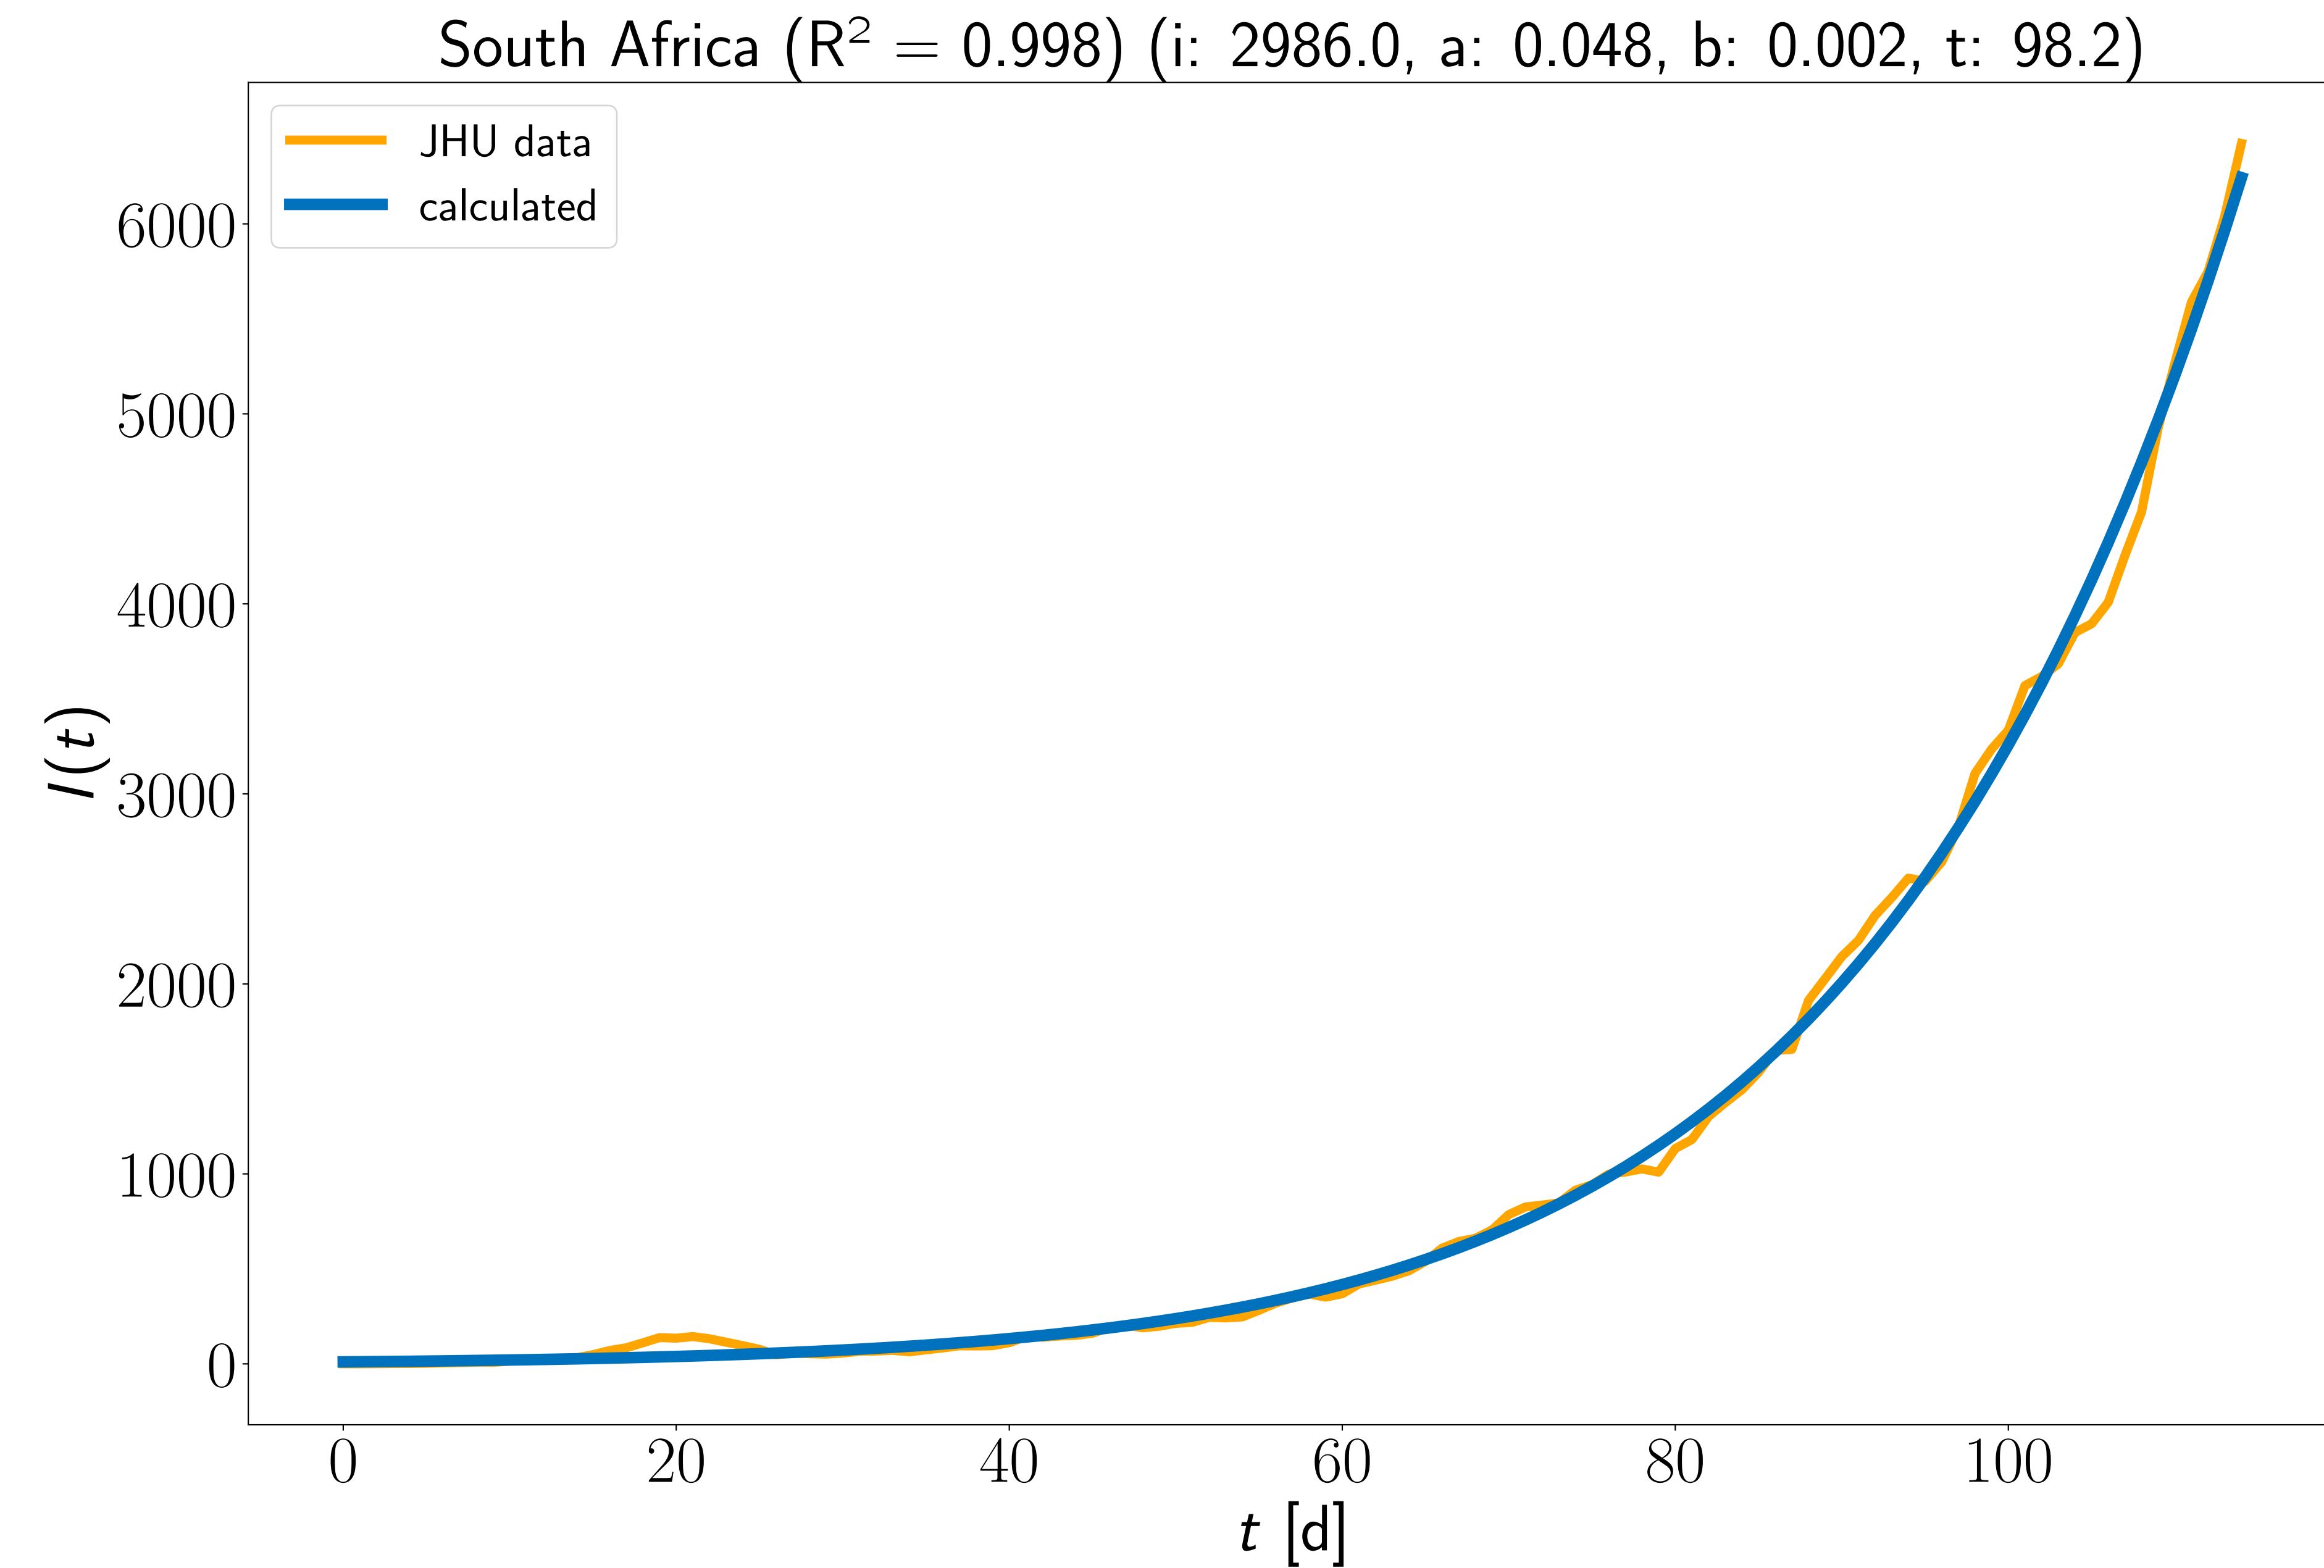

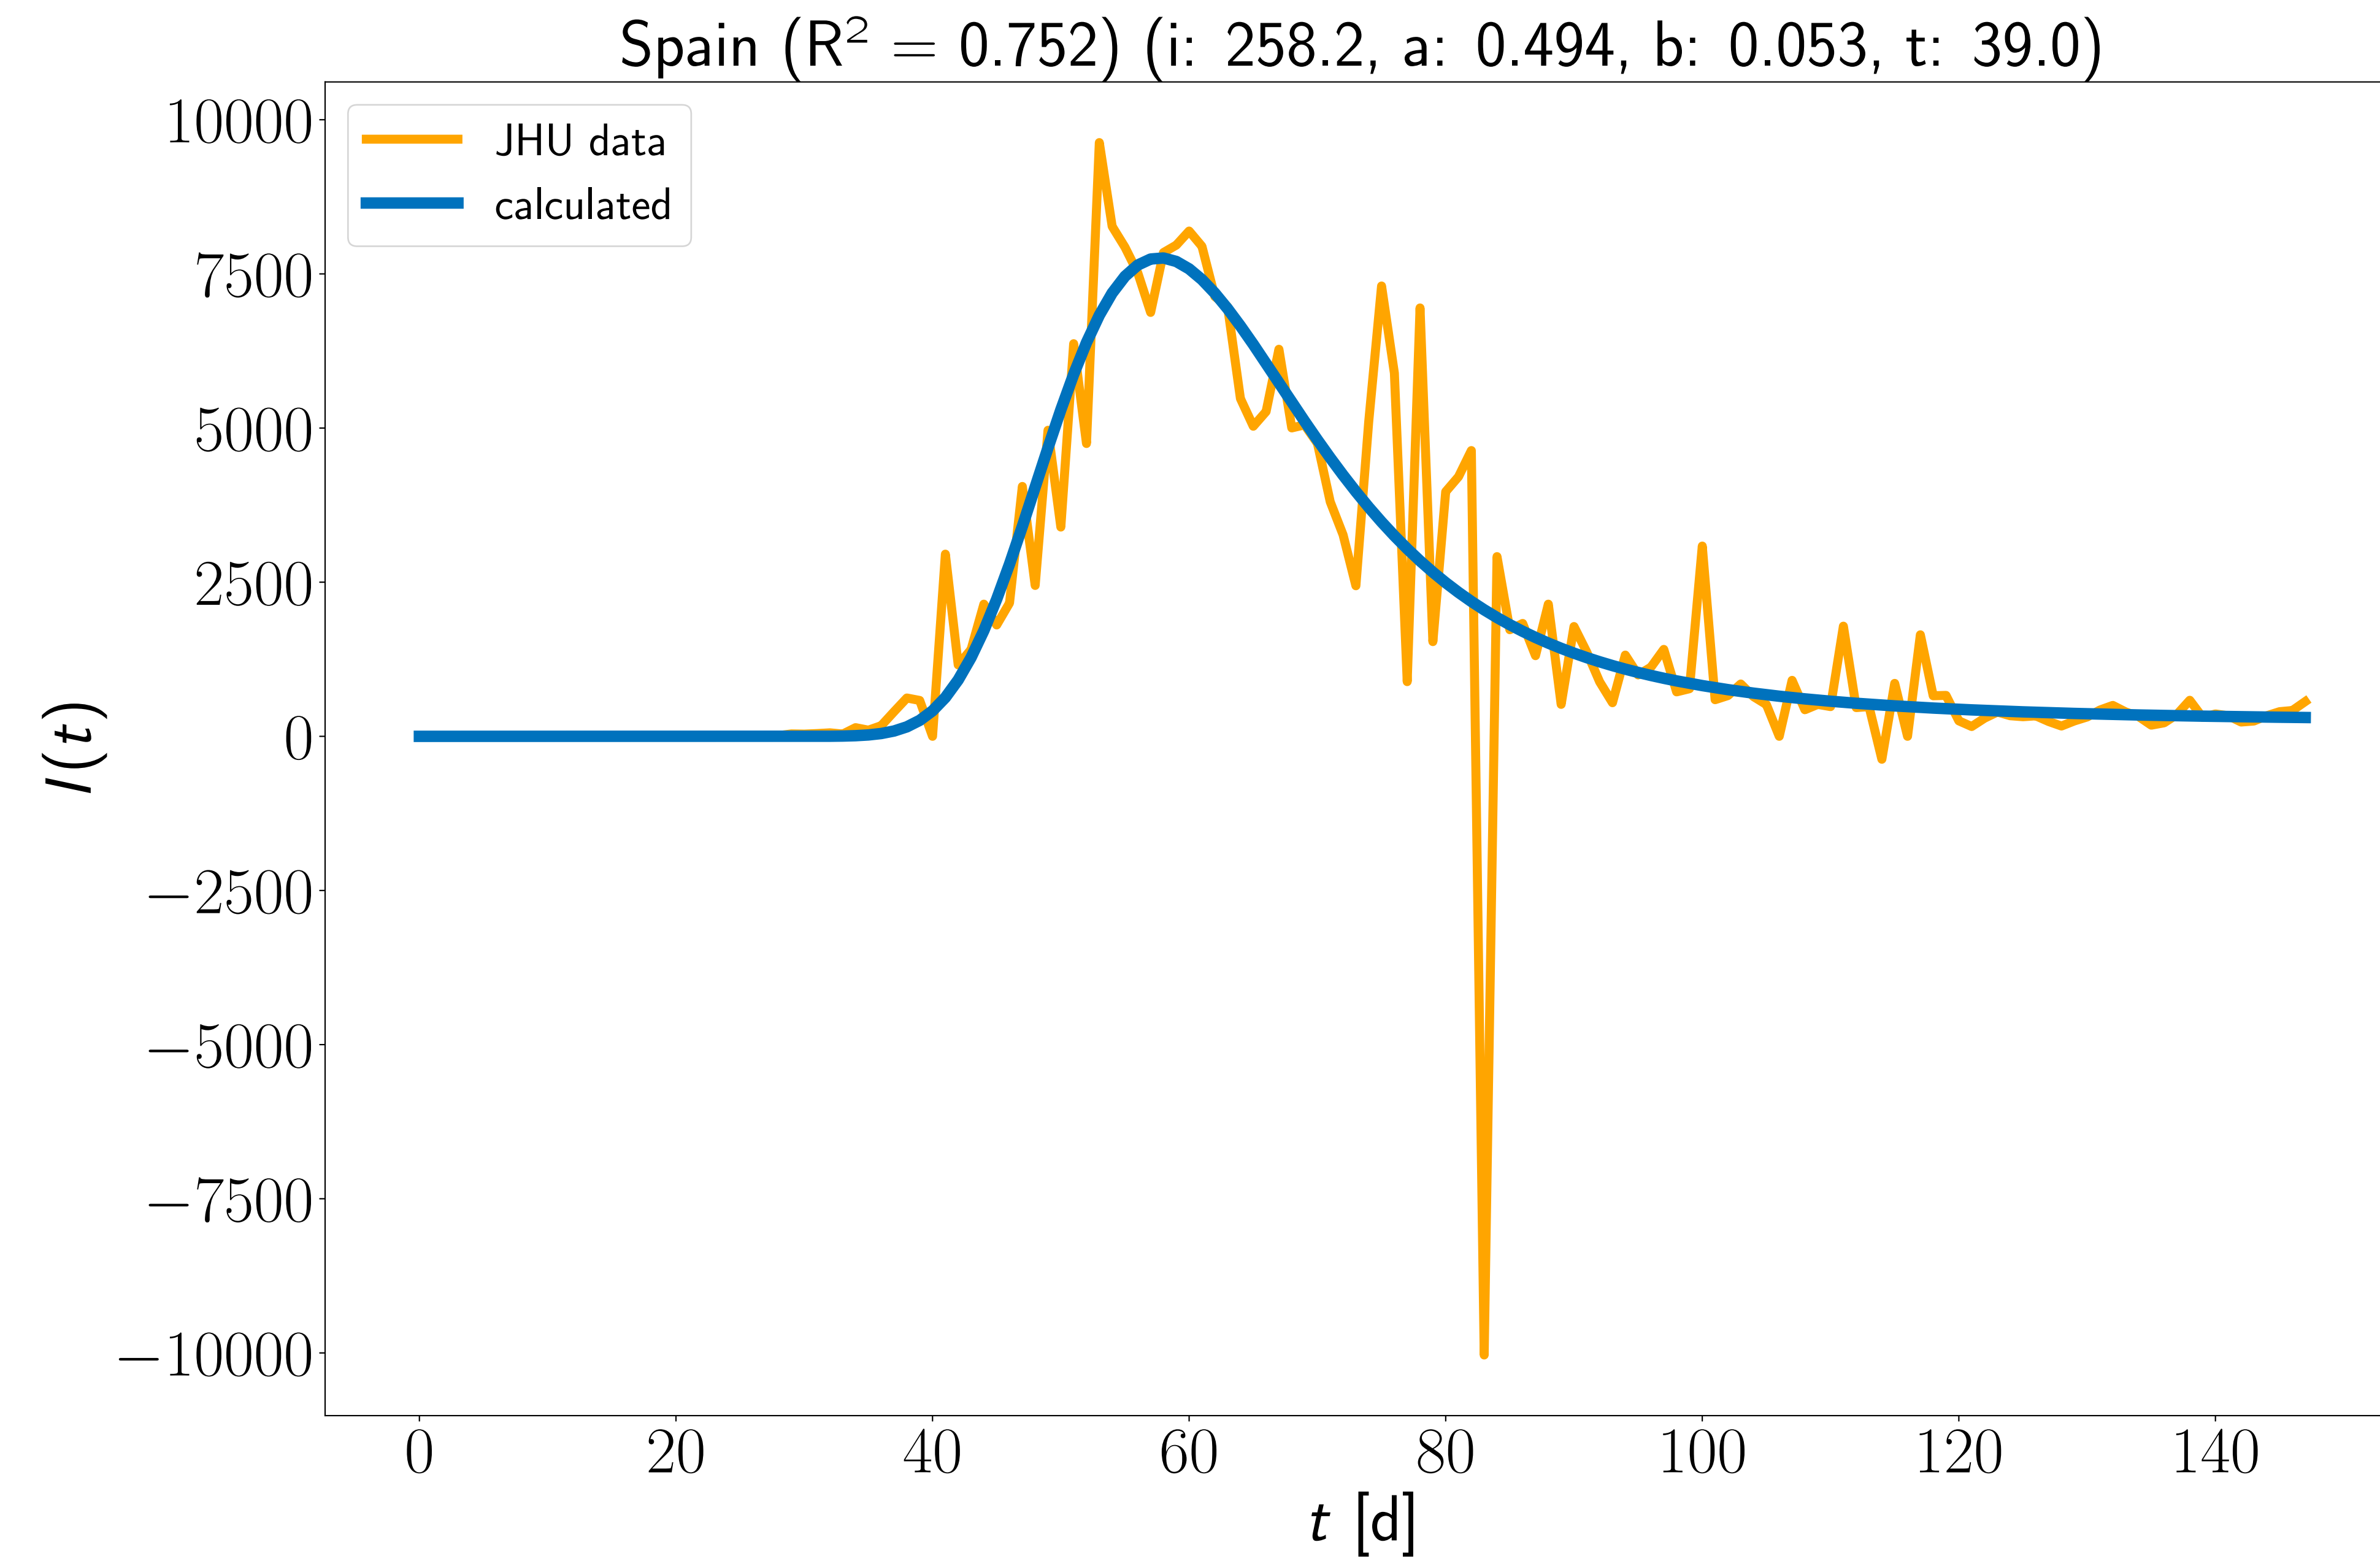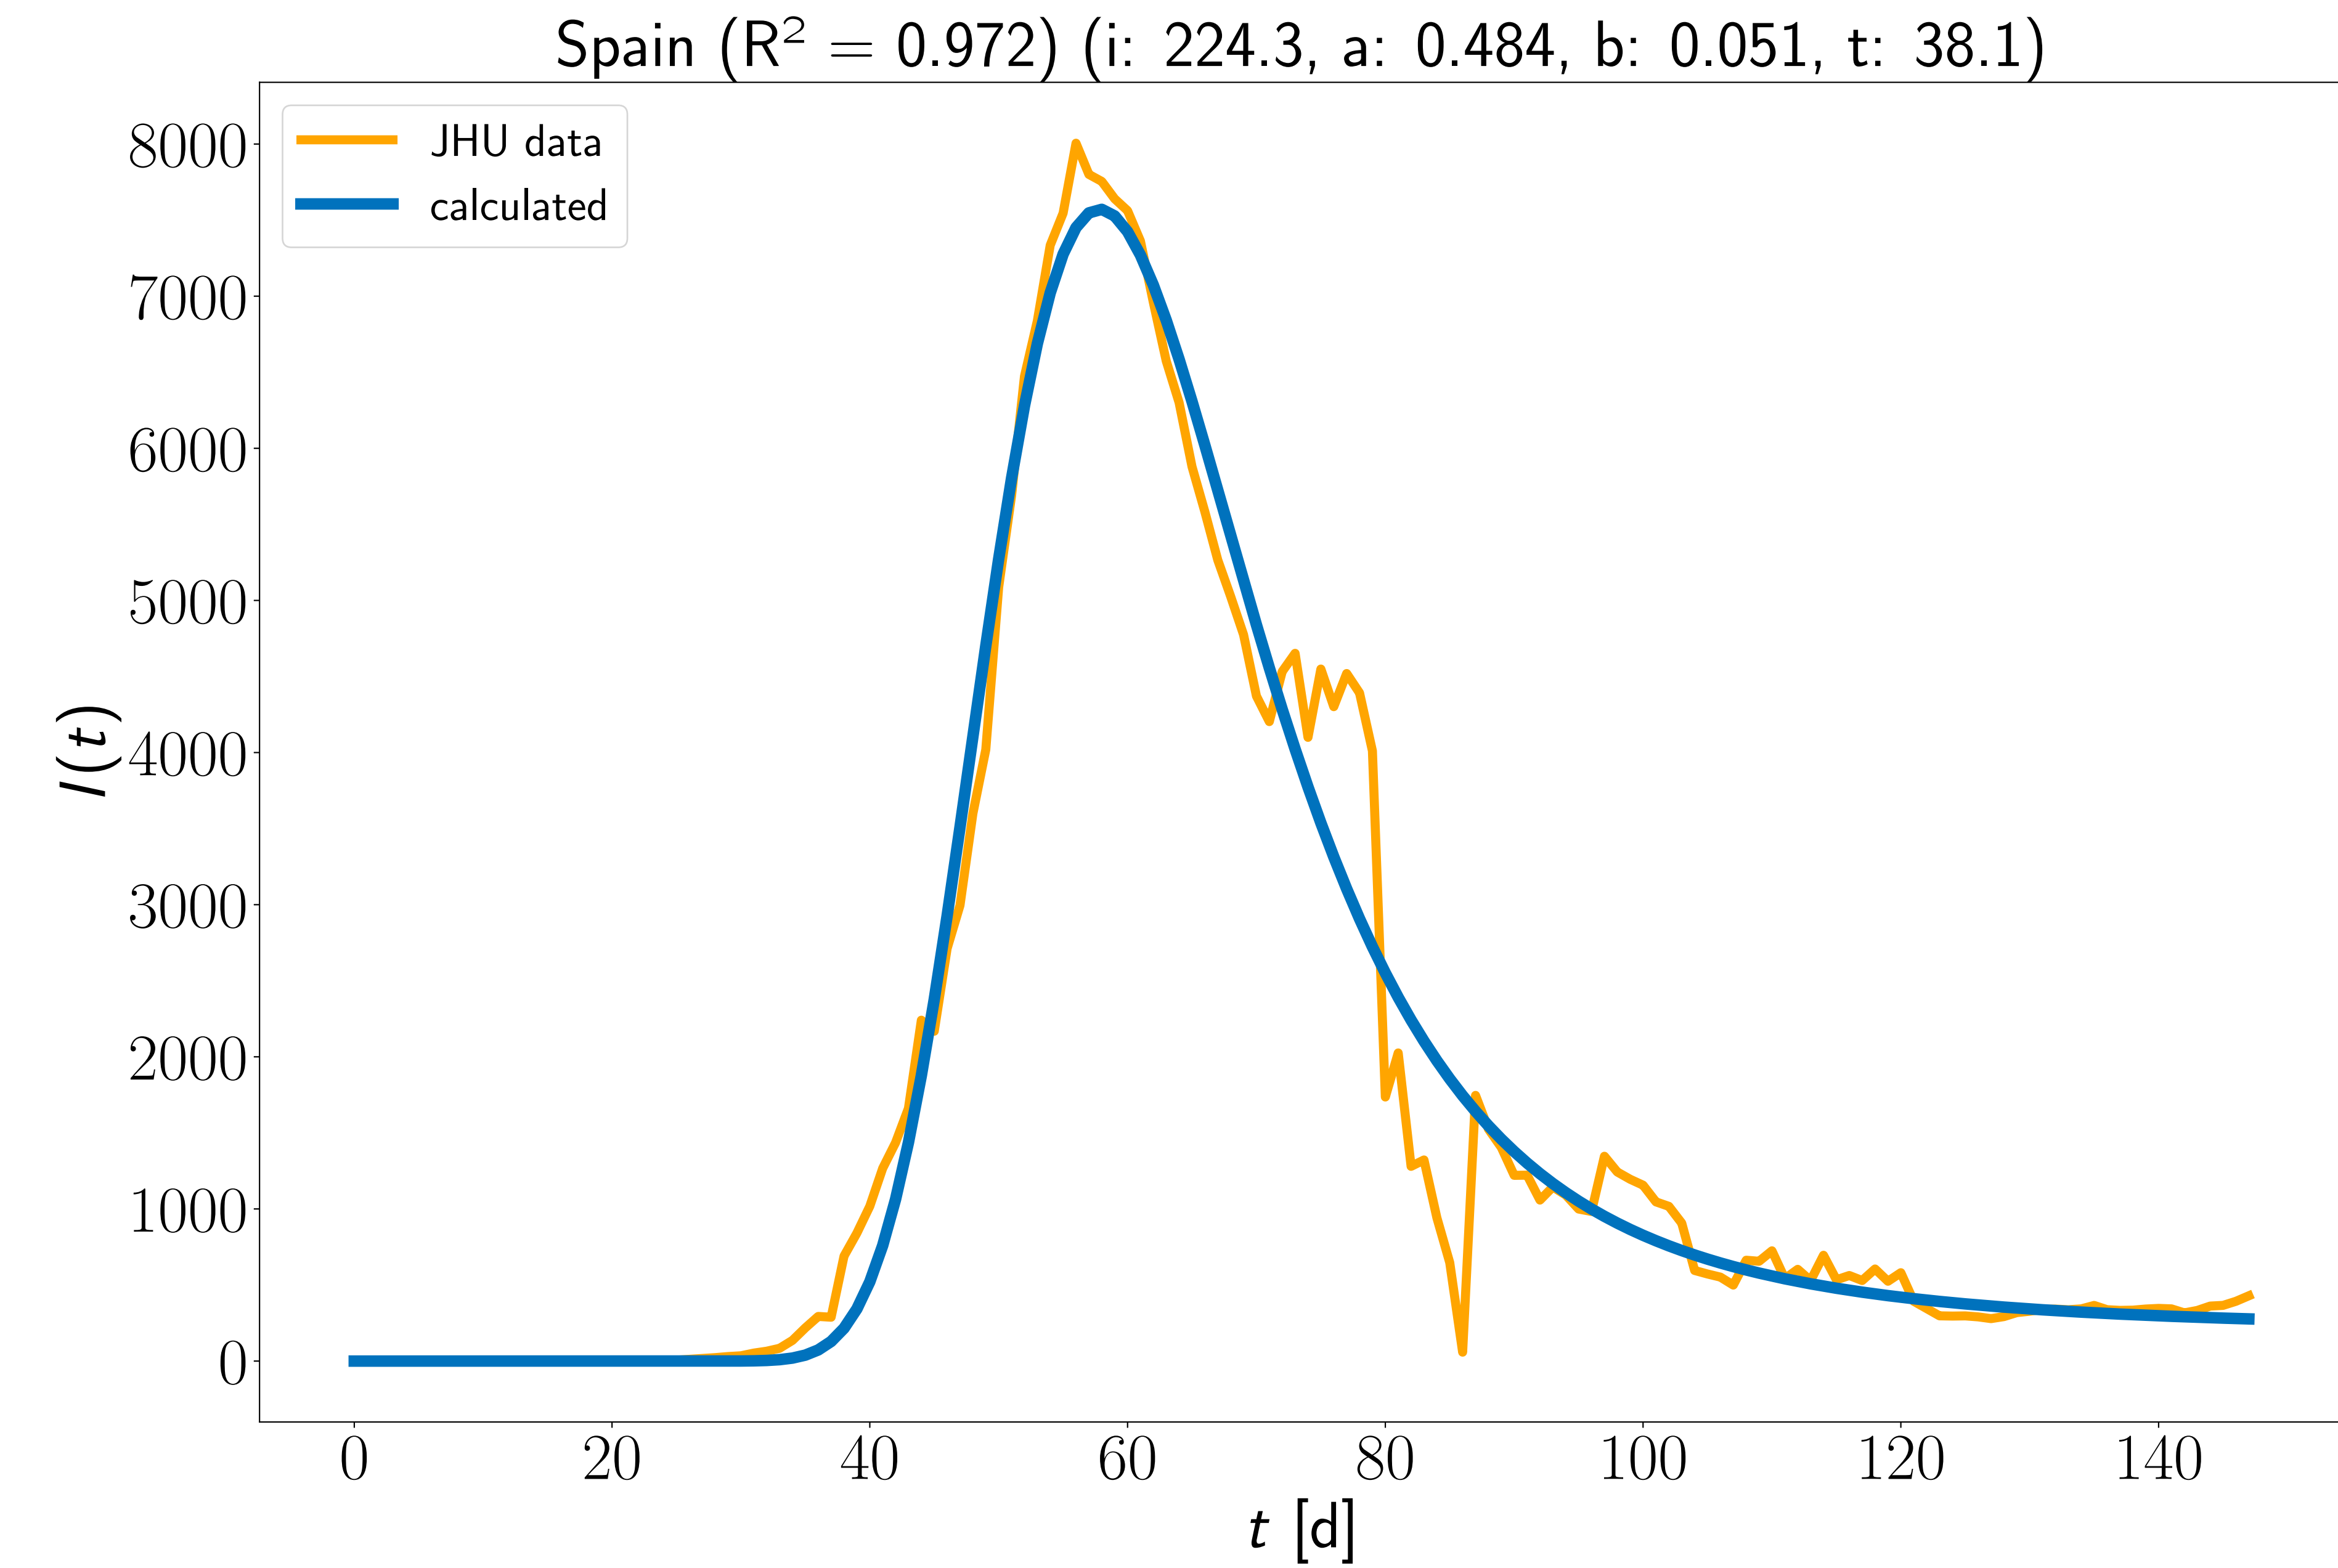

Switzerland ( $R^2 = 0.89$ ) (i: 16.6, a: 0.587, b: 0.051, t: 10.3)

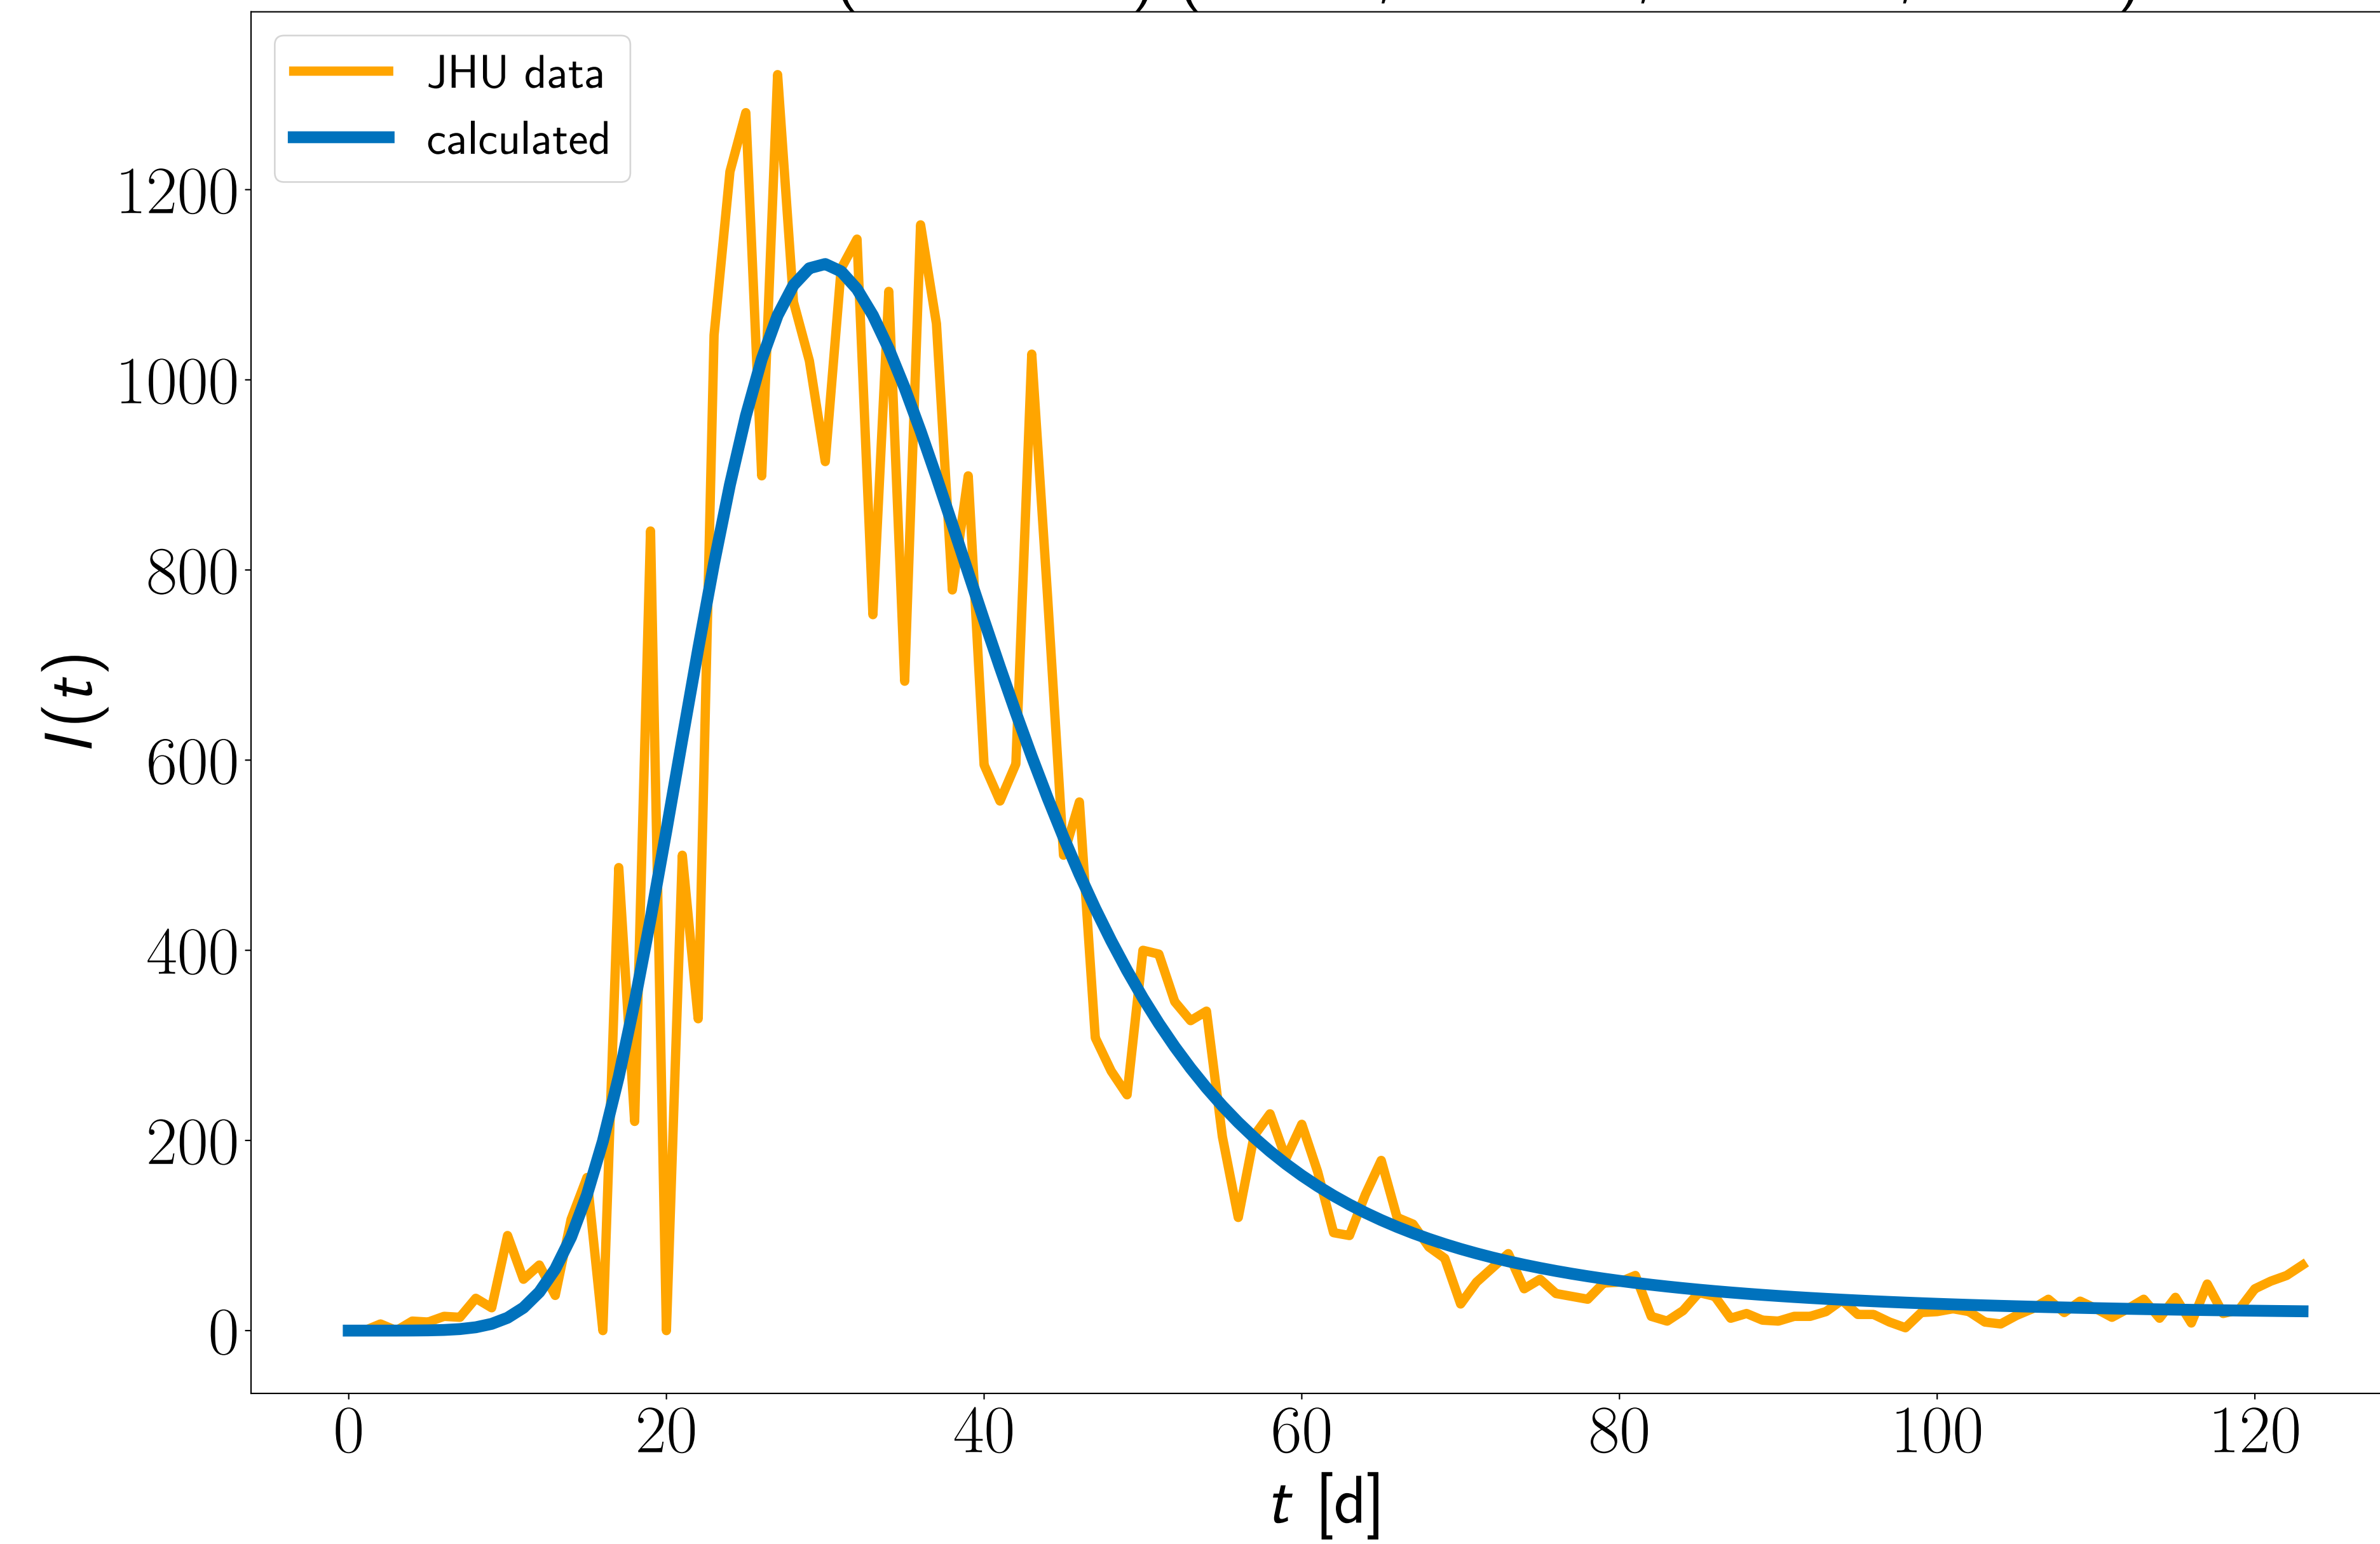

Switzerland ( $R^2 = 0.992$ ) (i: 12.2, a: 0.583, b: 0.048, t: 9.1)

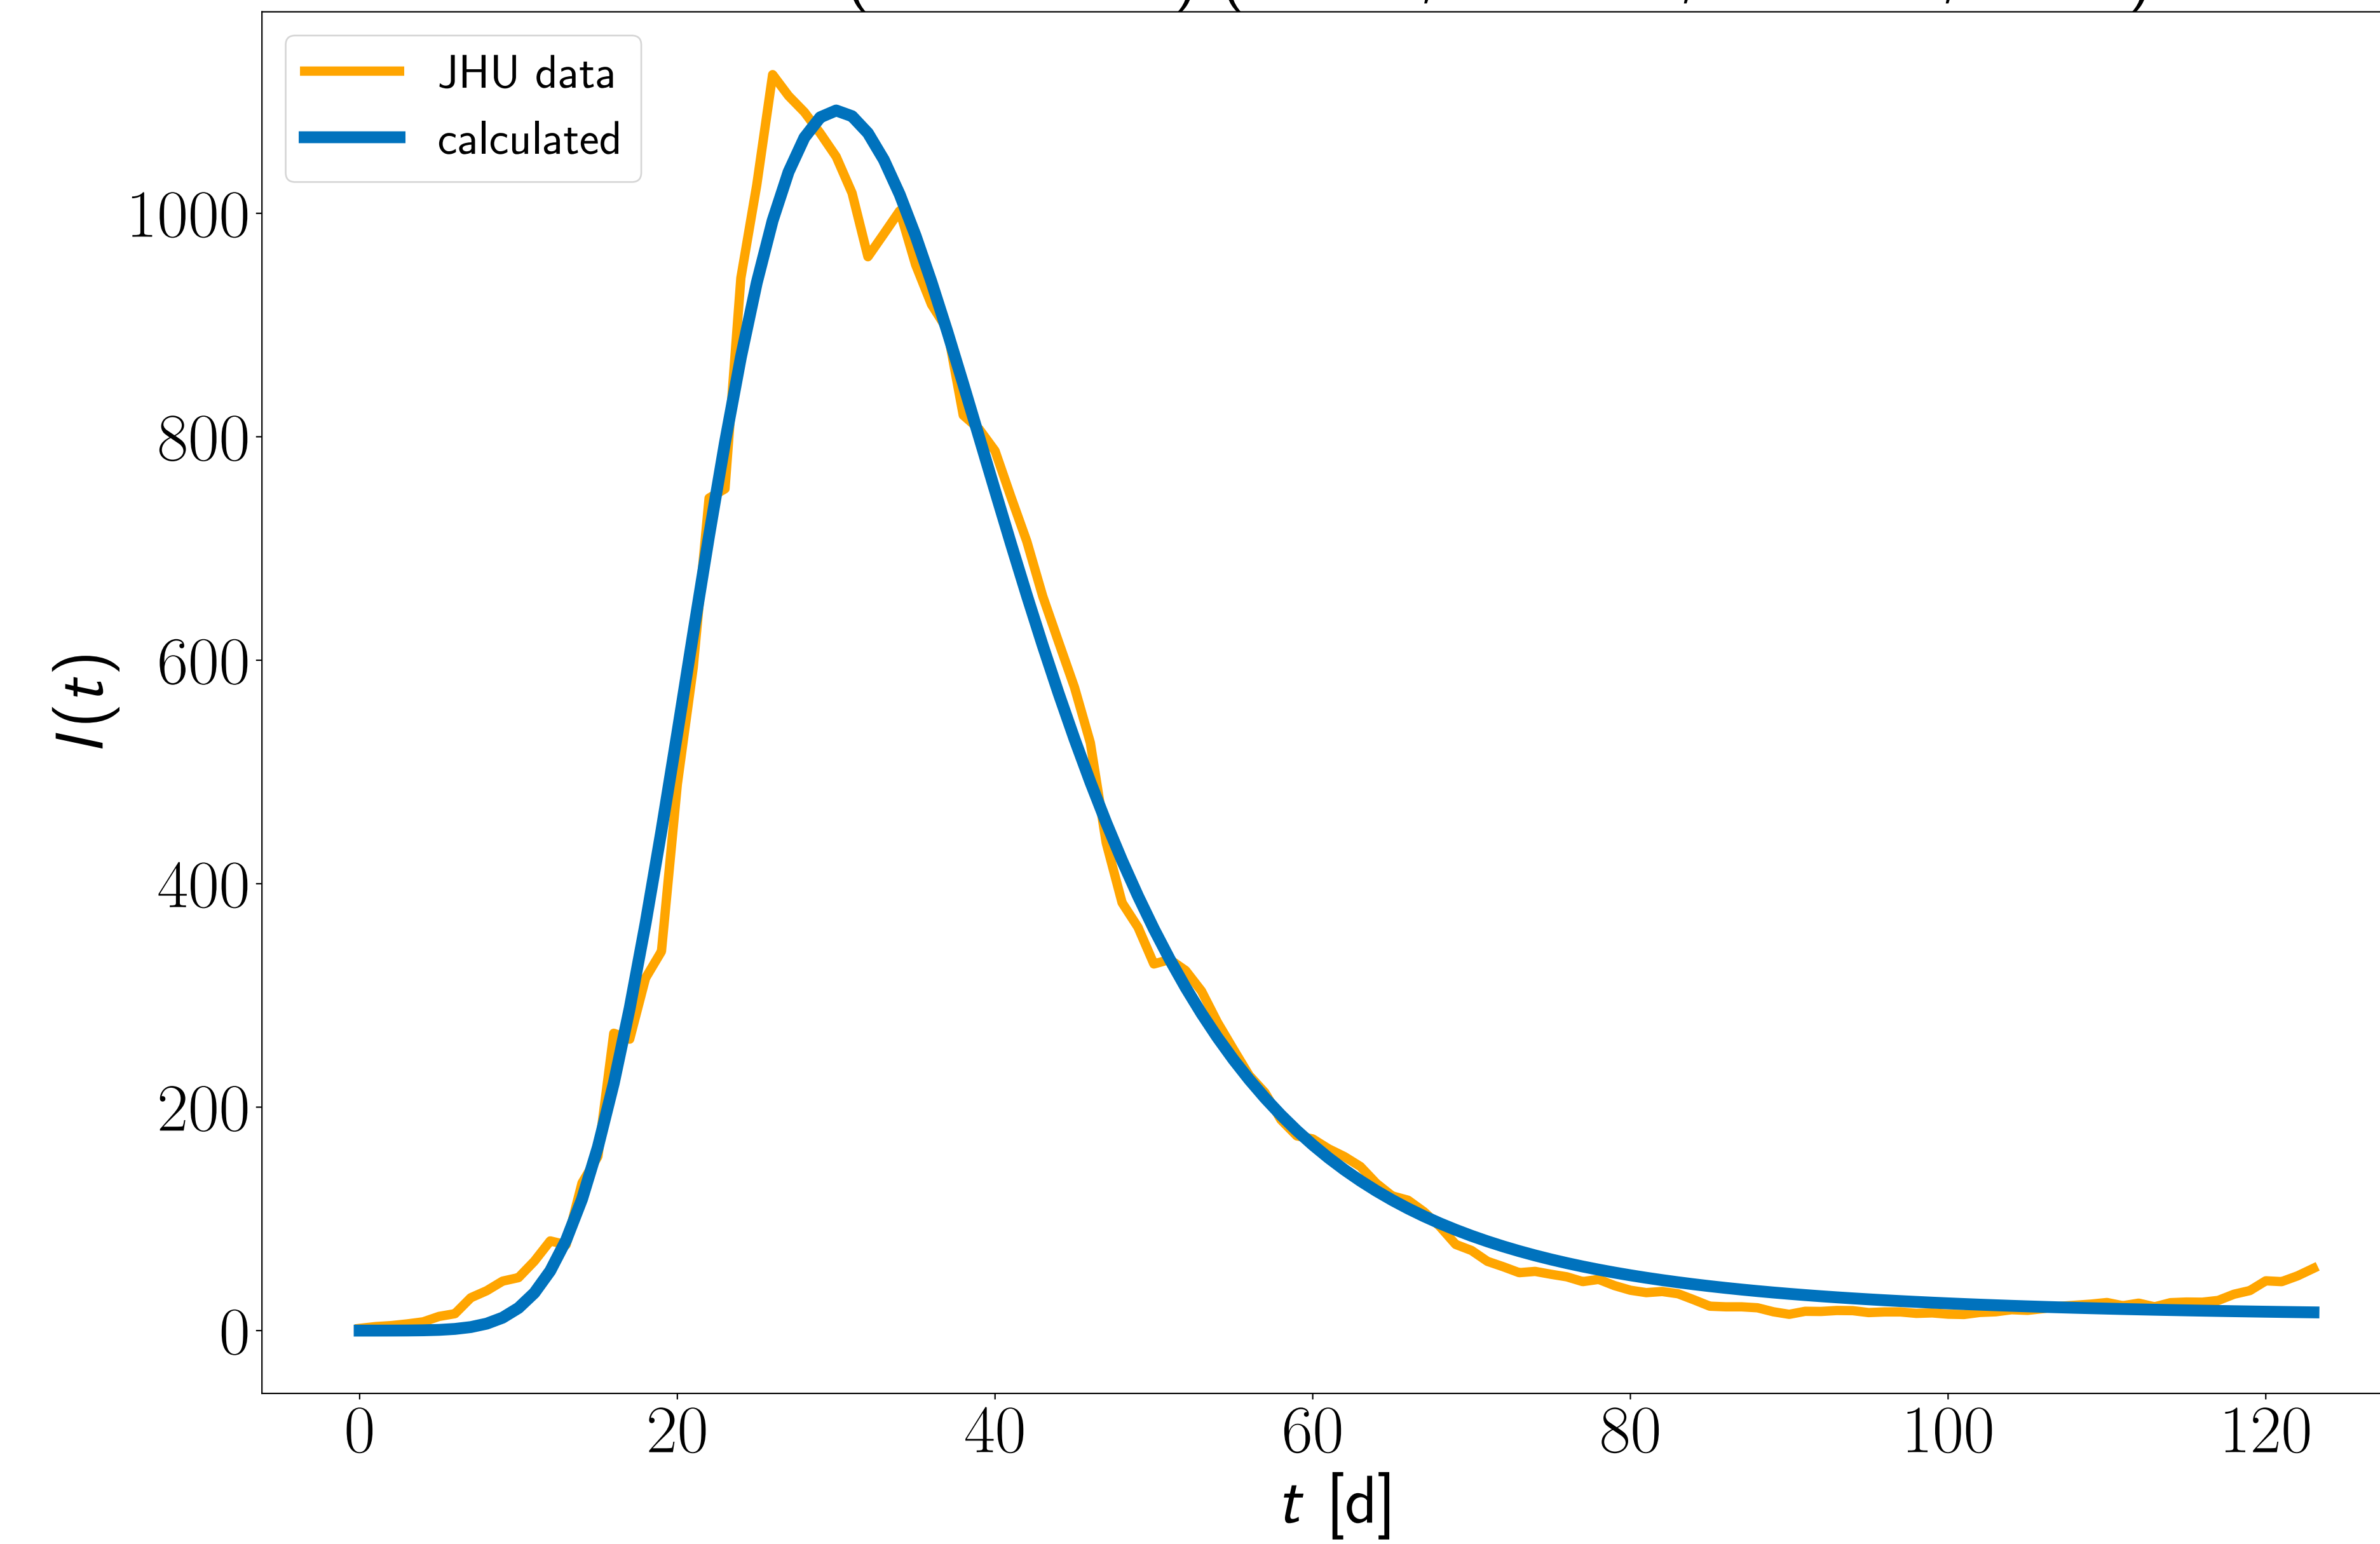

Thailand ( $R^2 = -0.302$ ) (i: 2.6, a: 2.0, b: 0.648, t: 131.7)

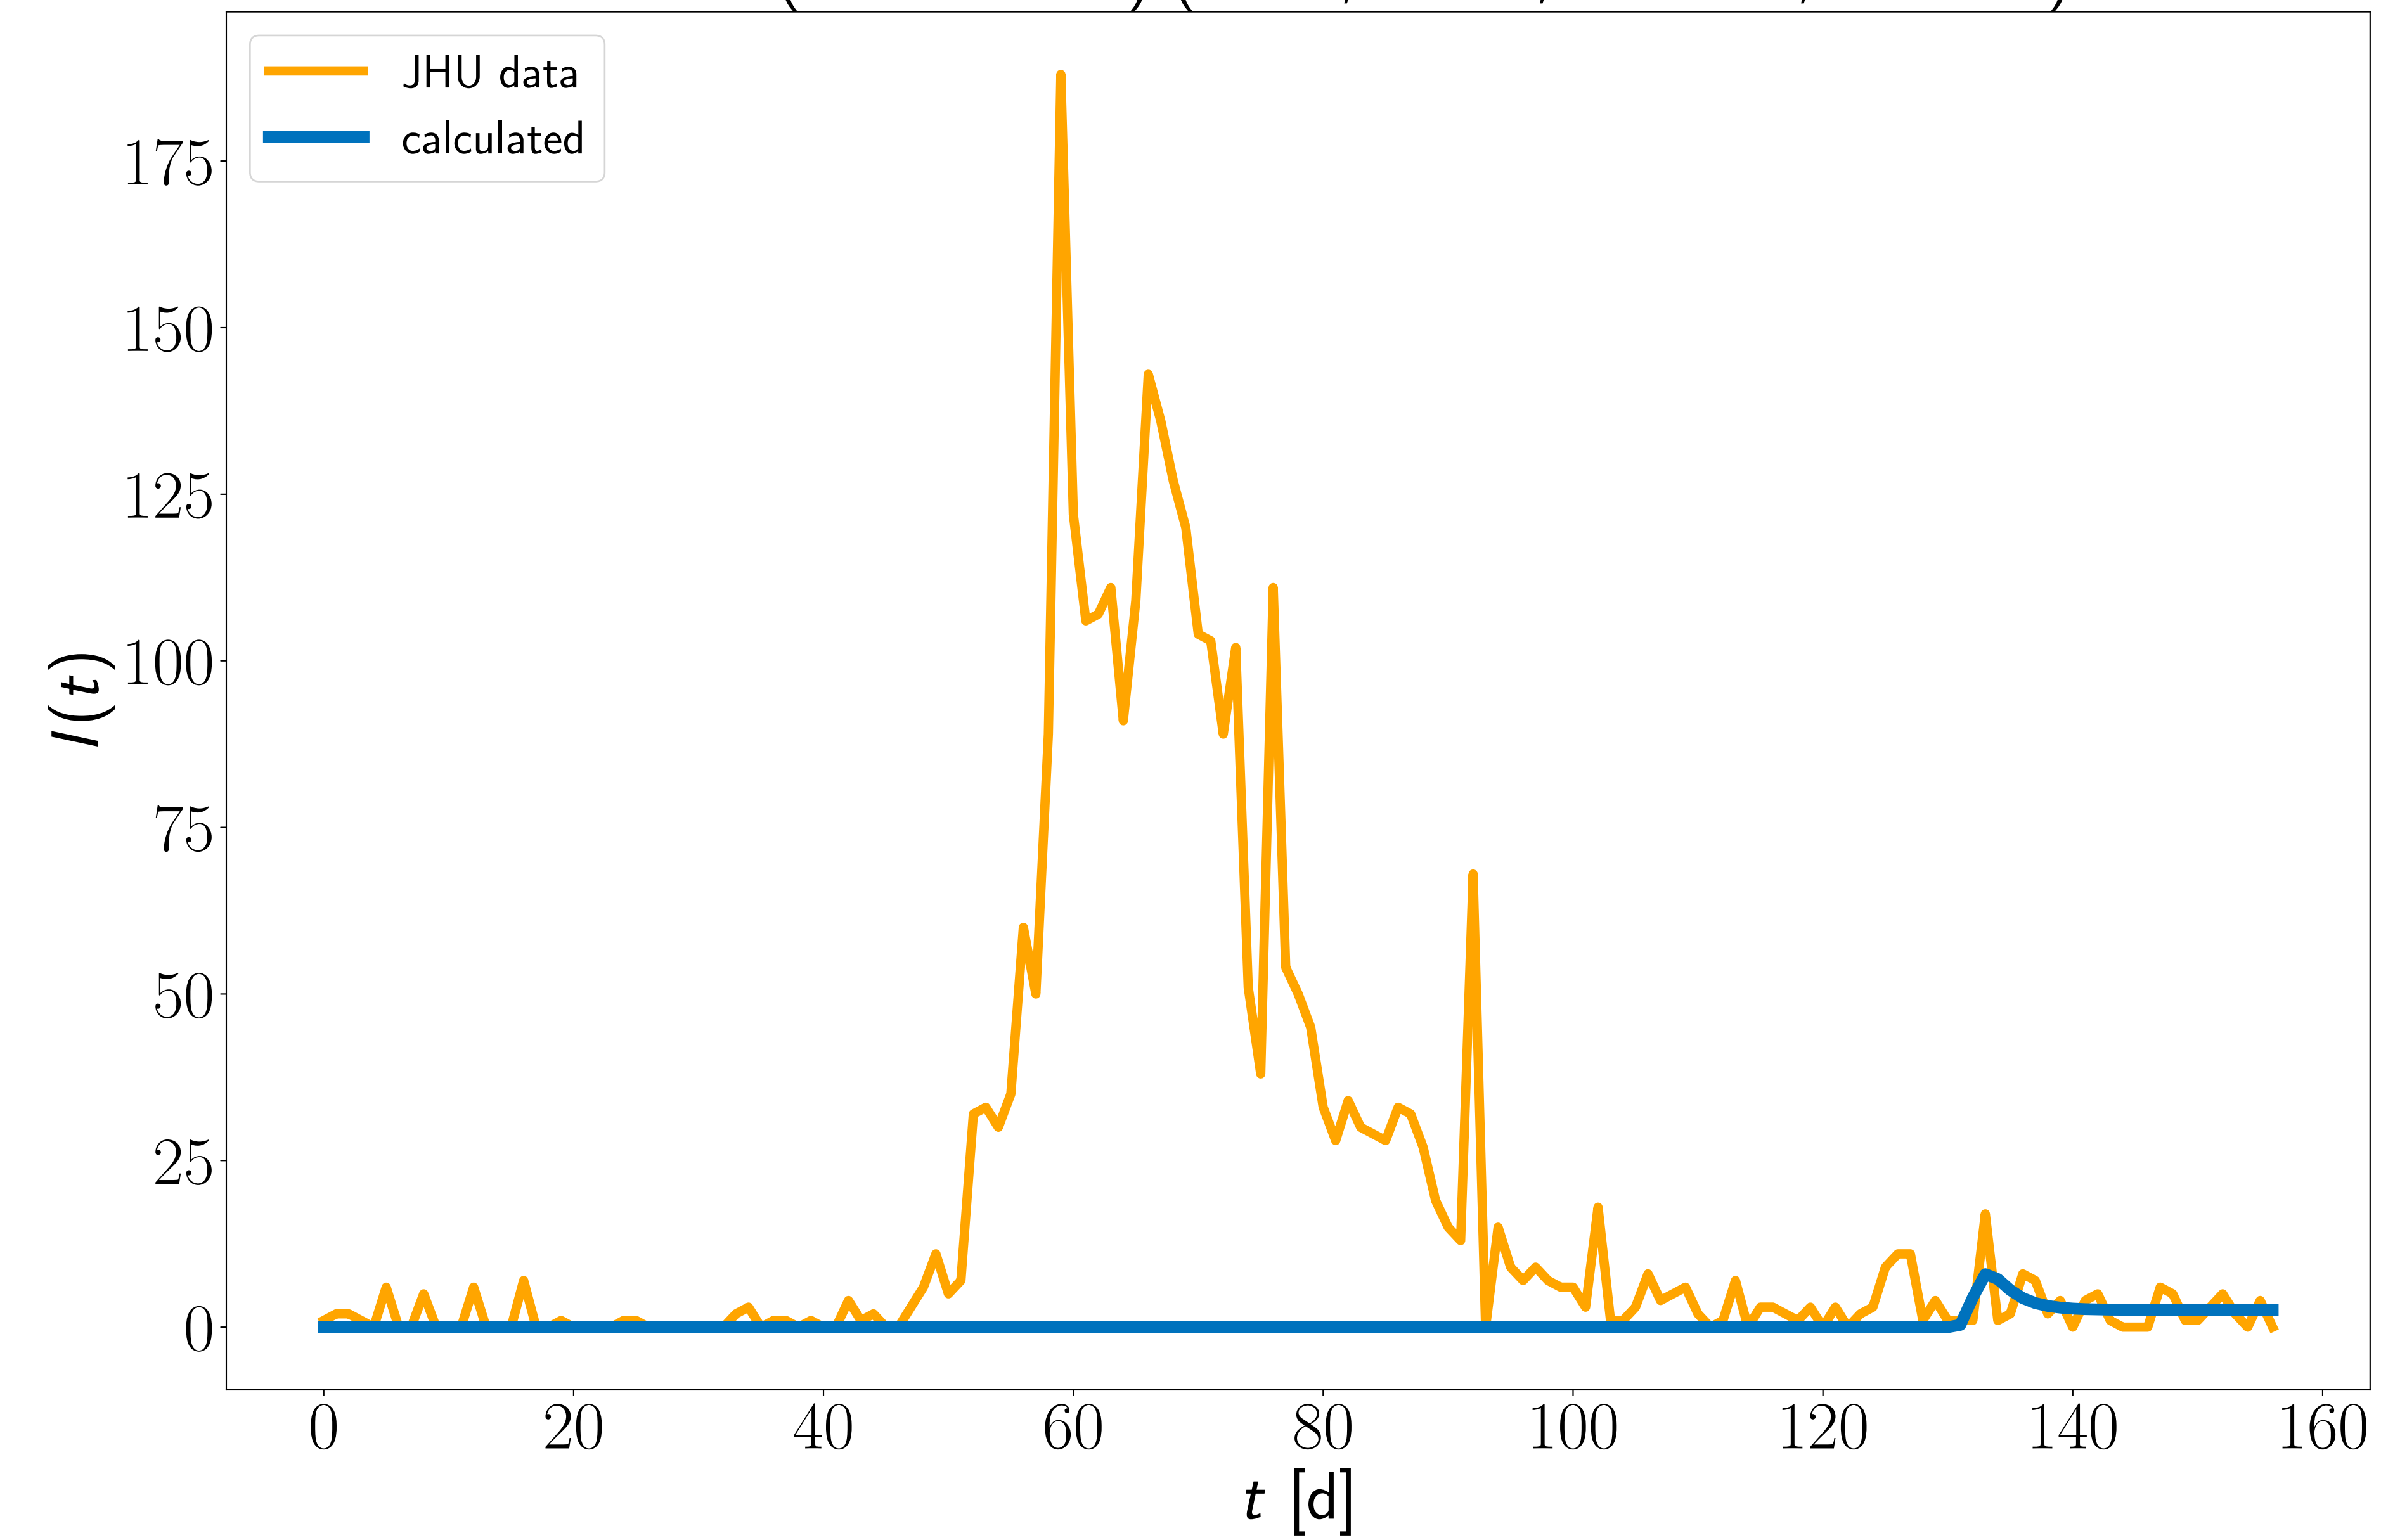

Thailand ( $R^2 = 0.993$ ) (i: 1.6, a: 0.674, b: 0.057, t: 46.7)

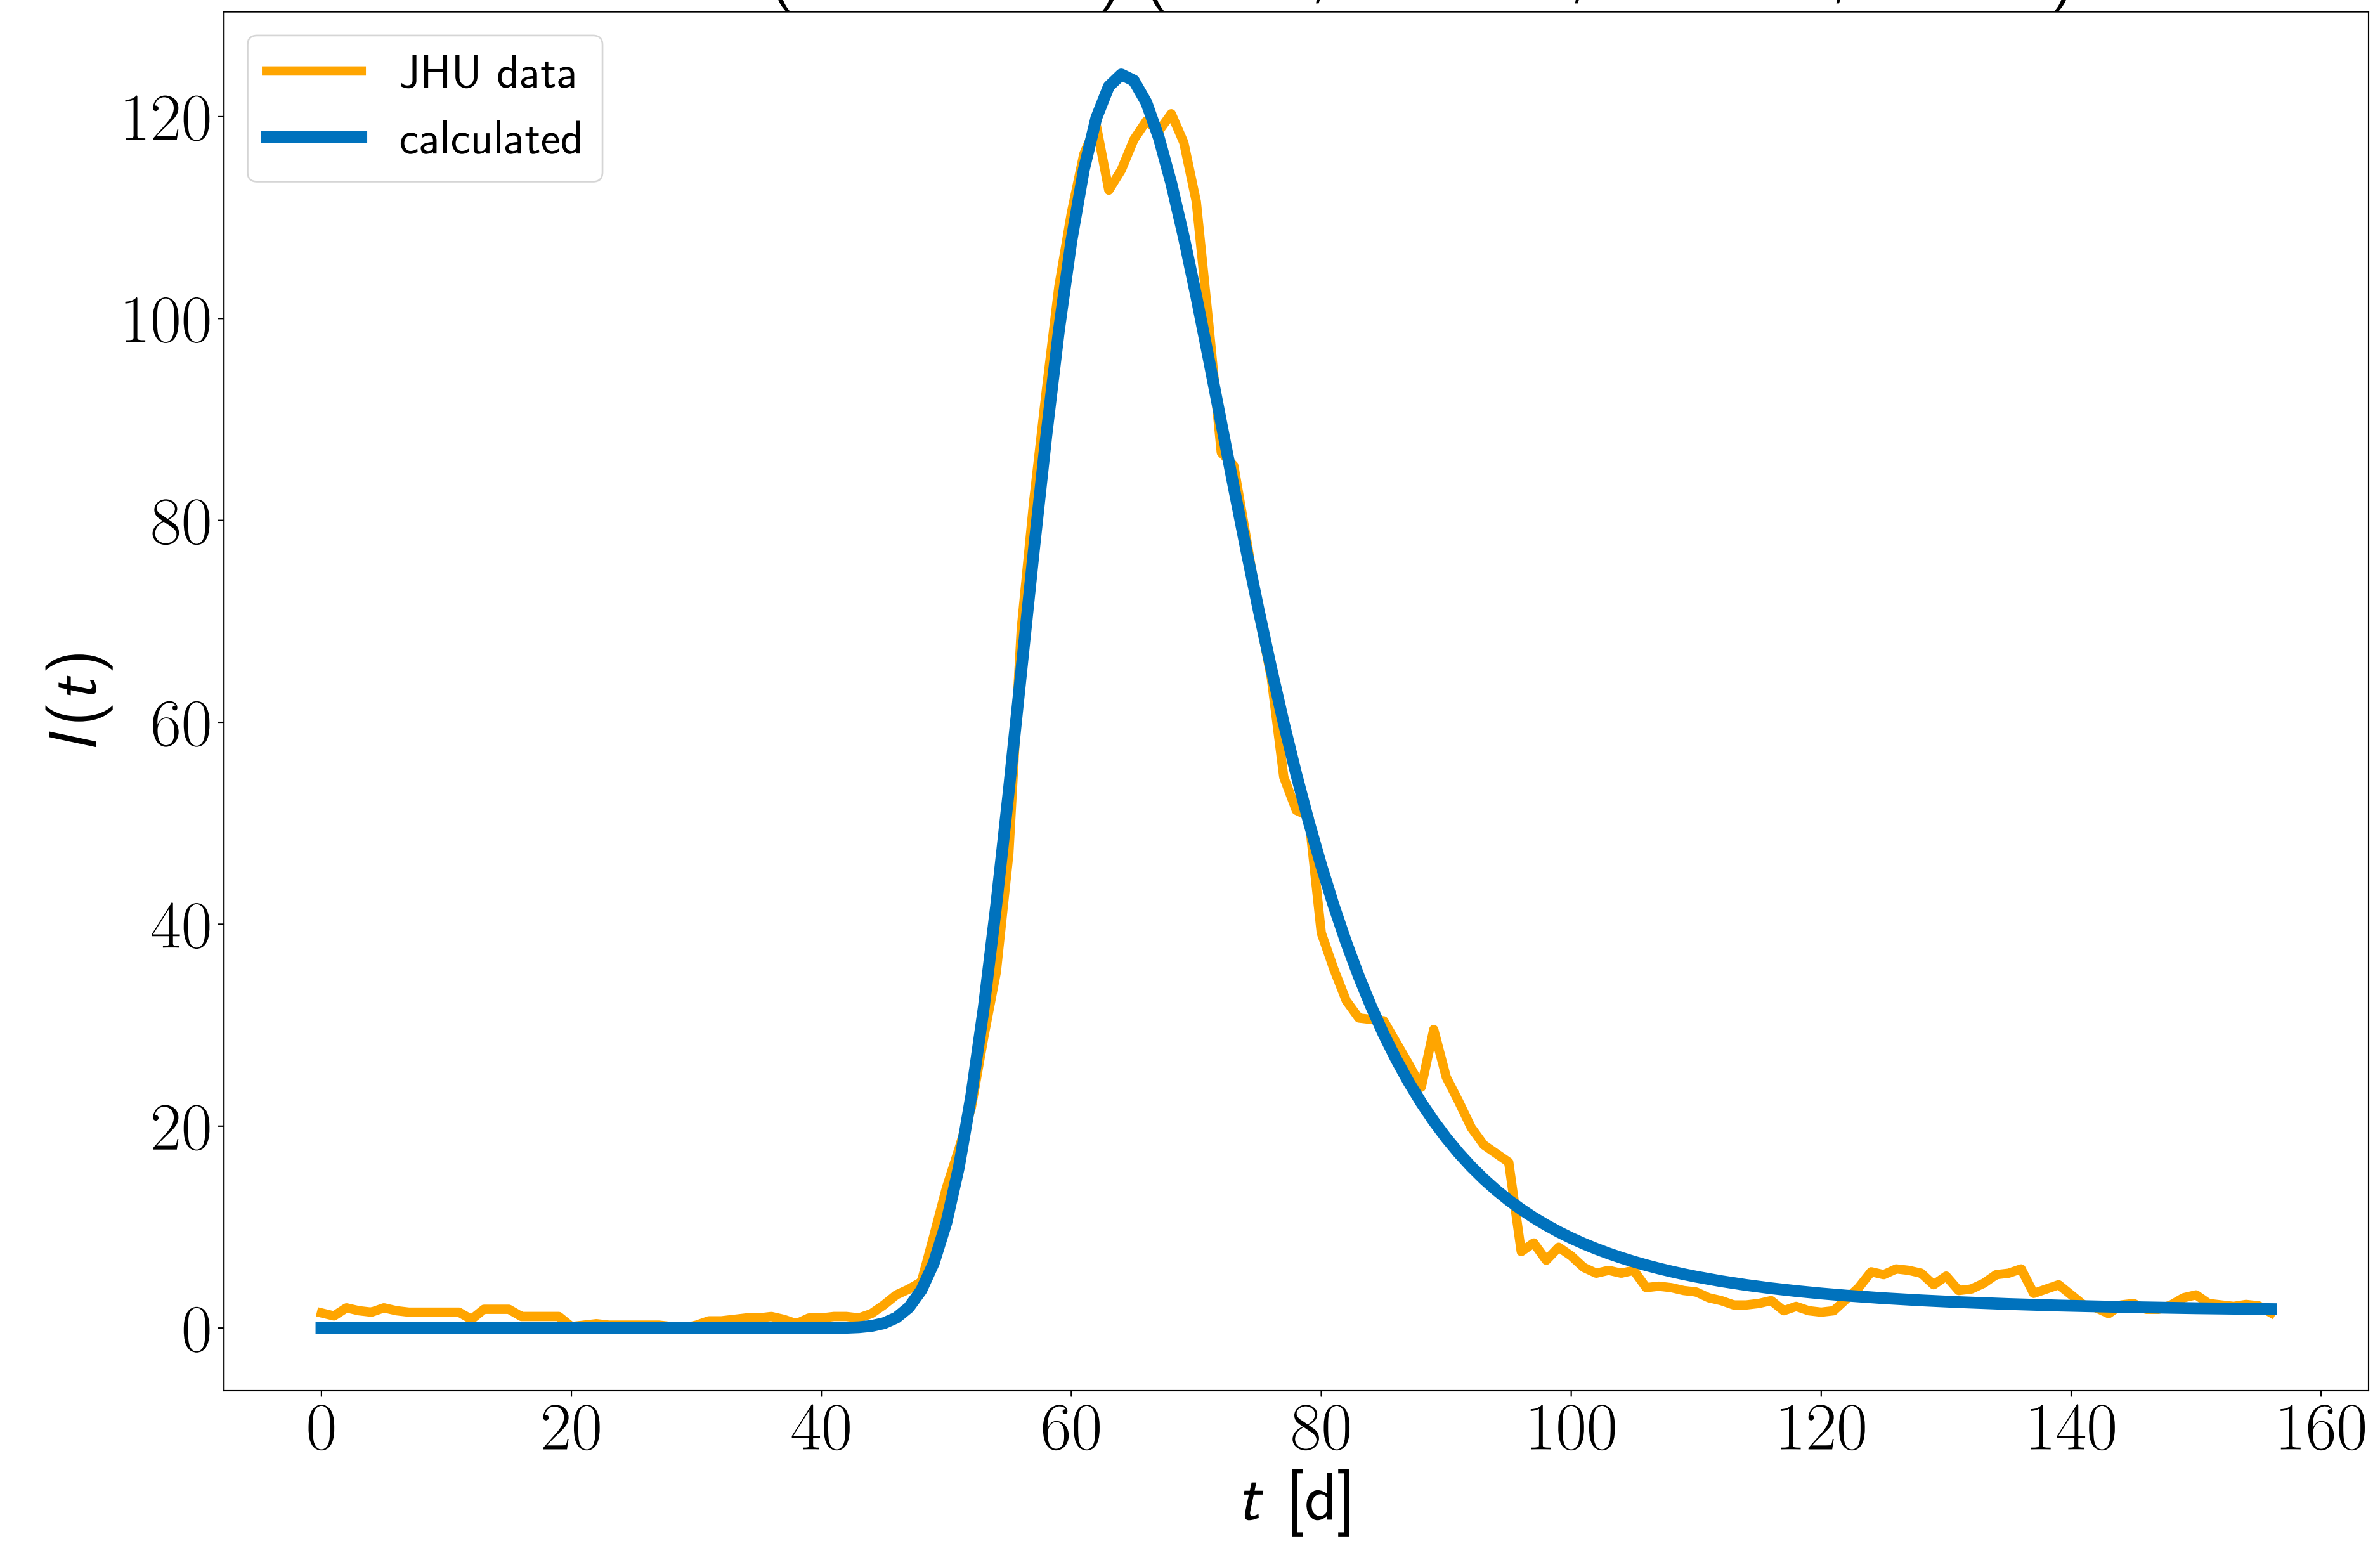

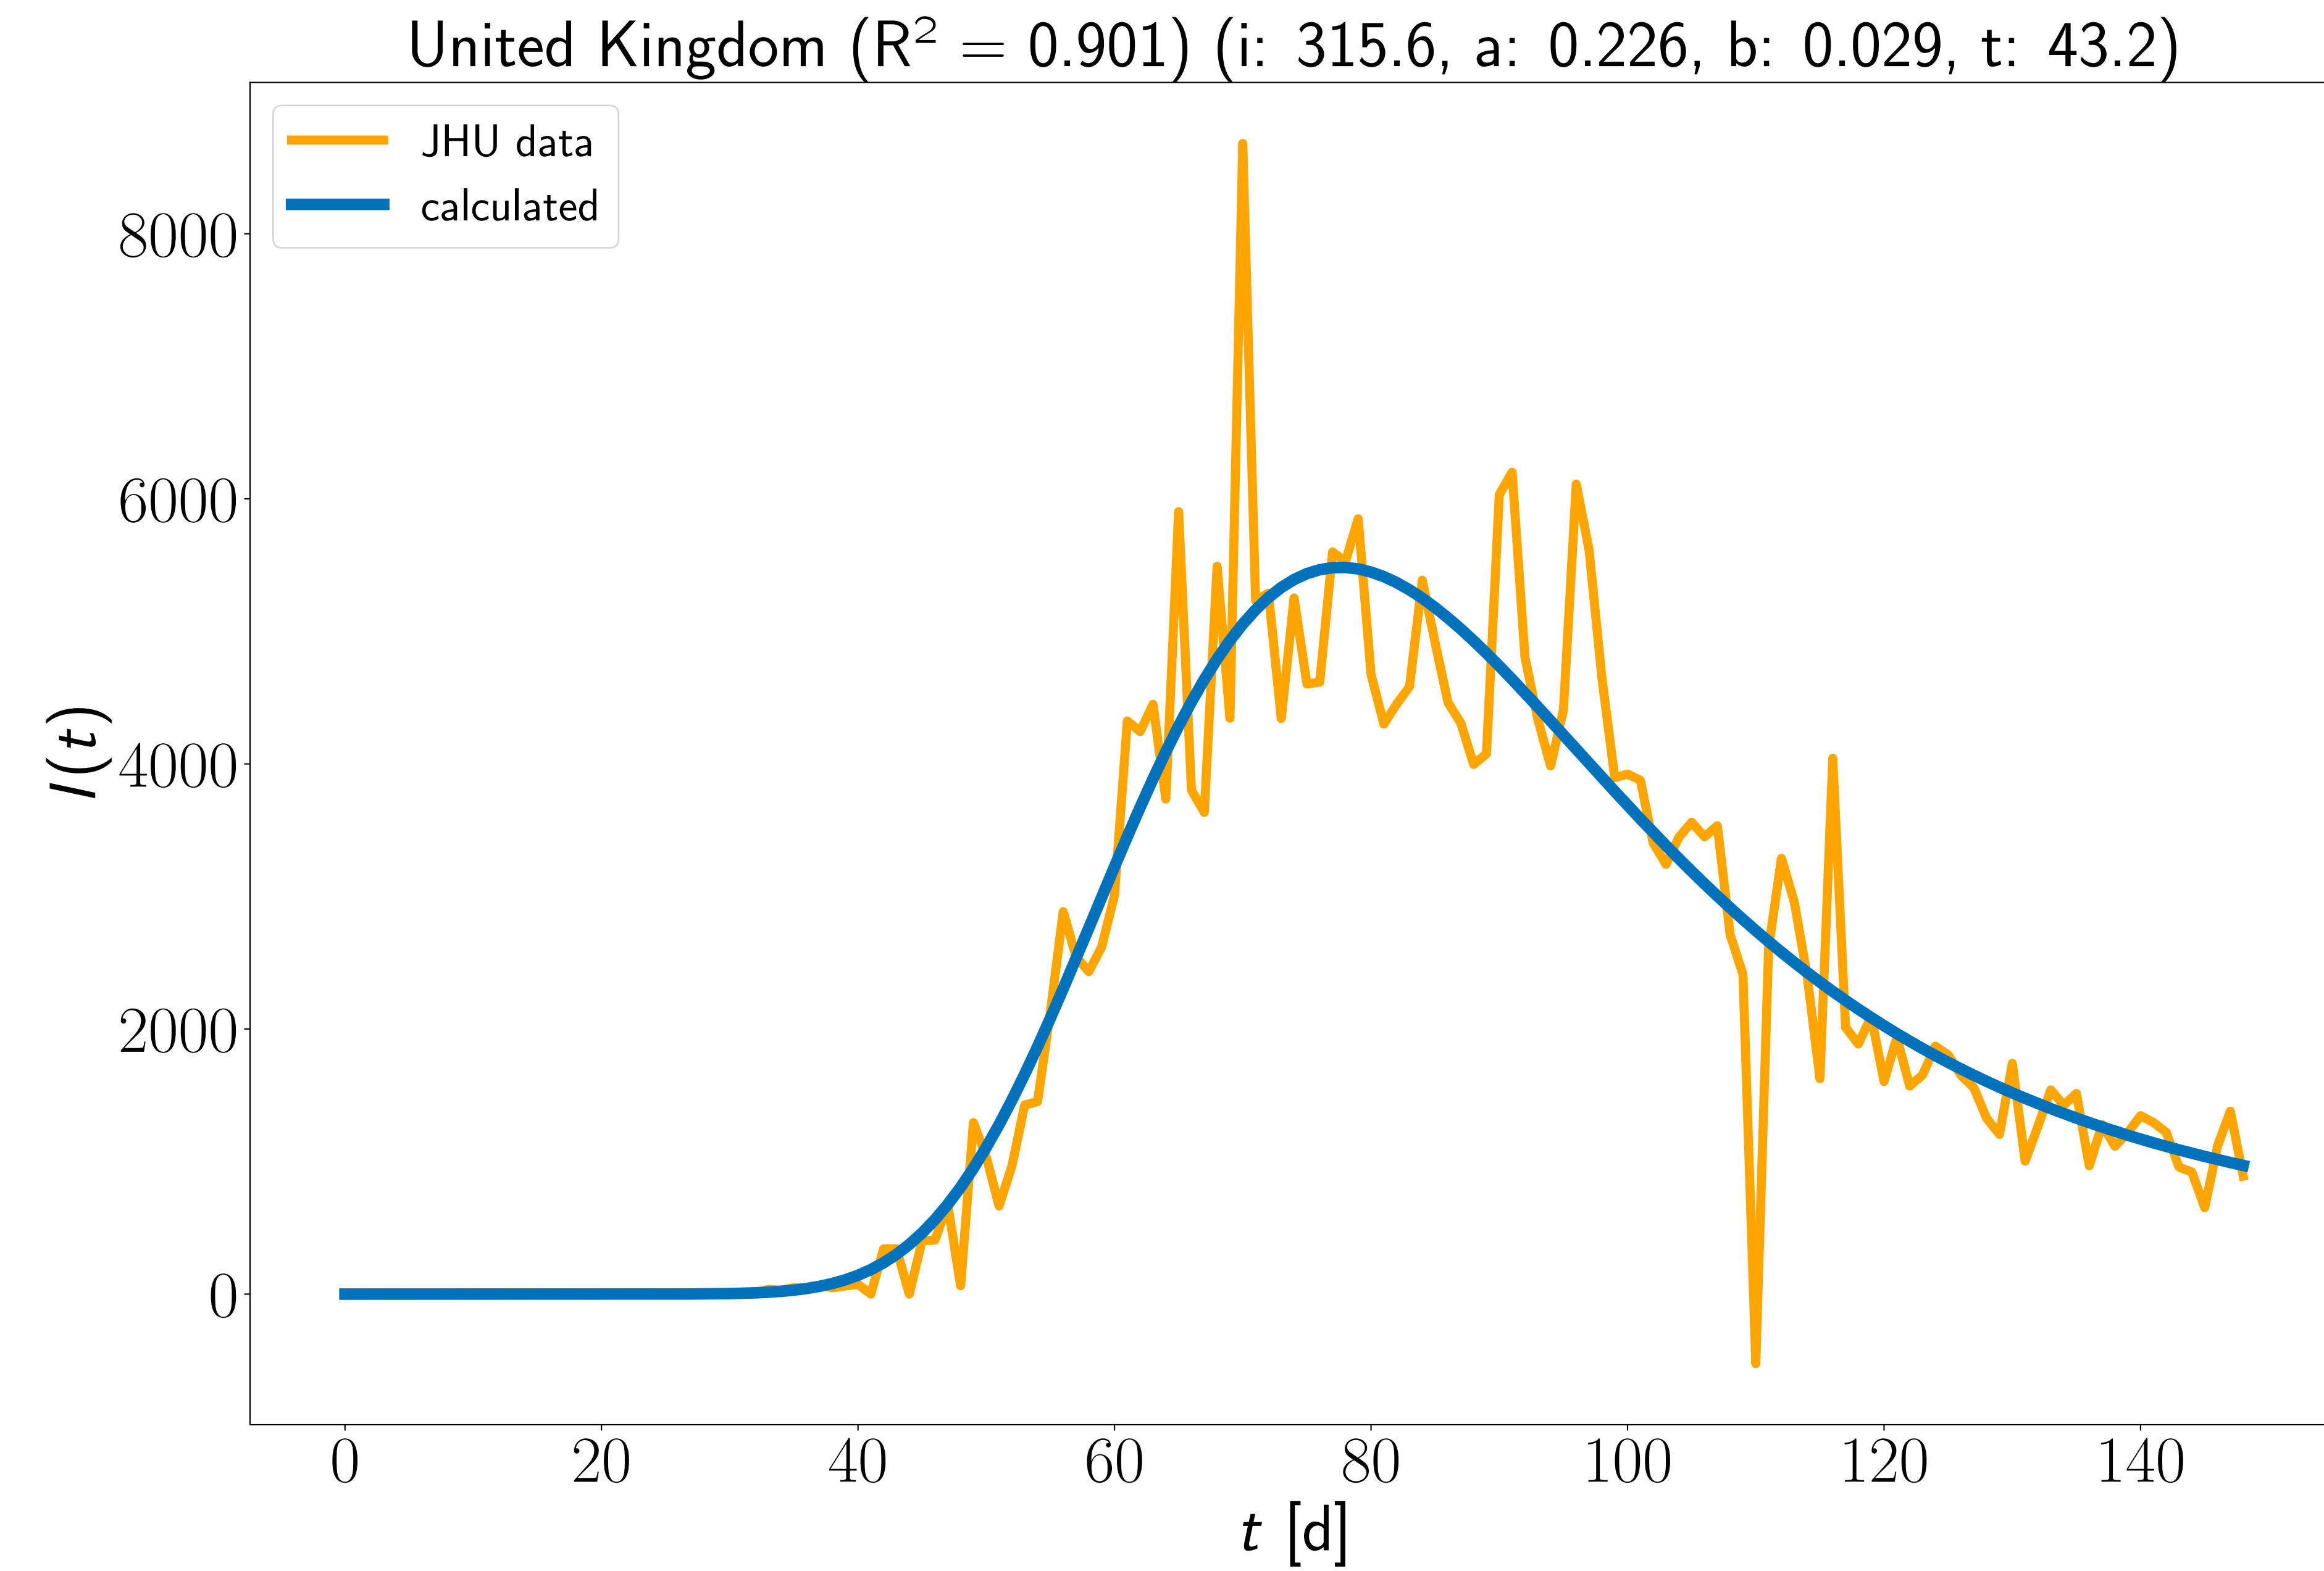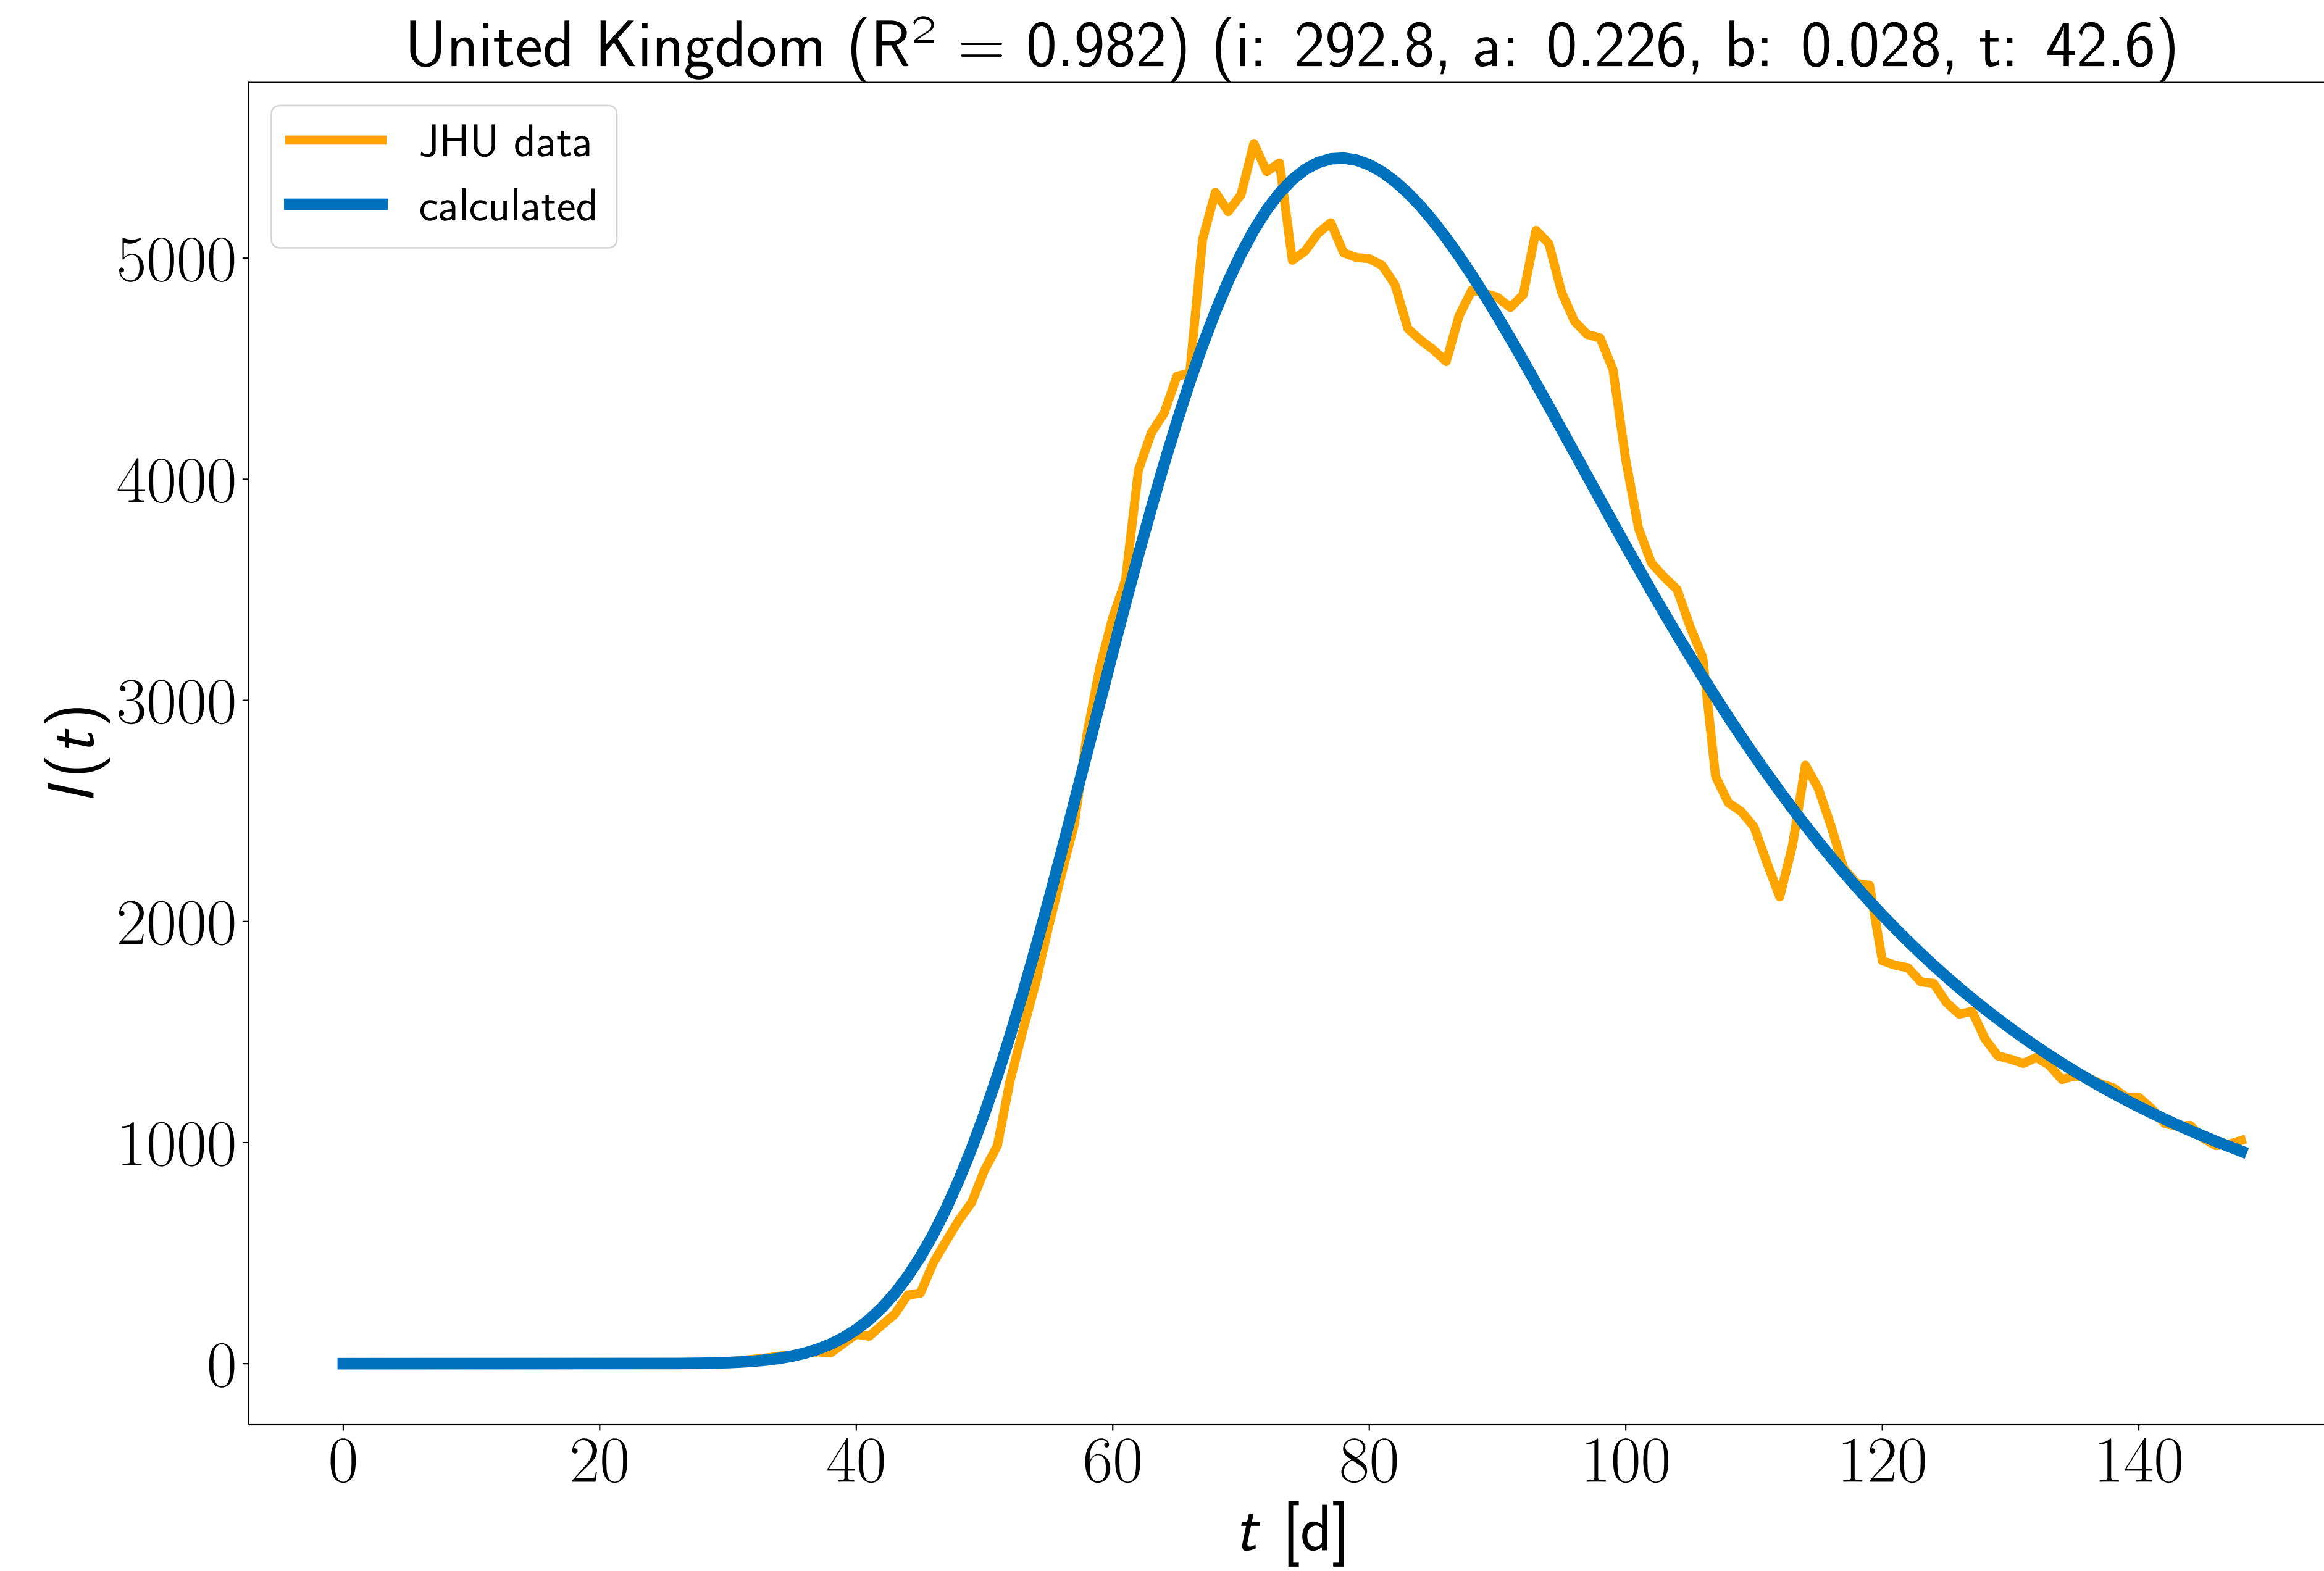

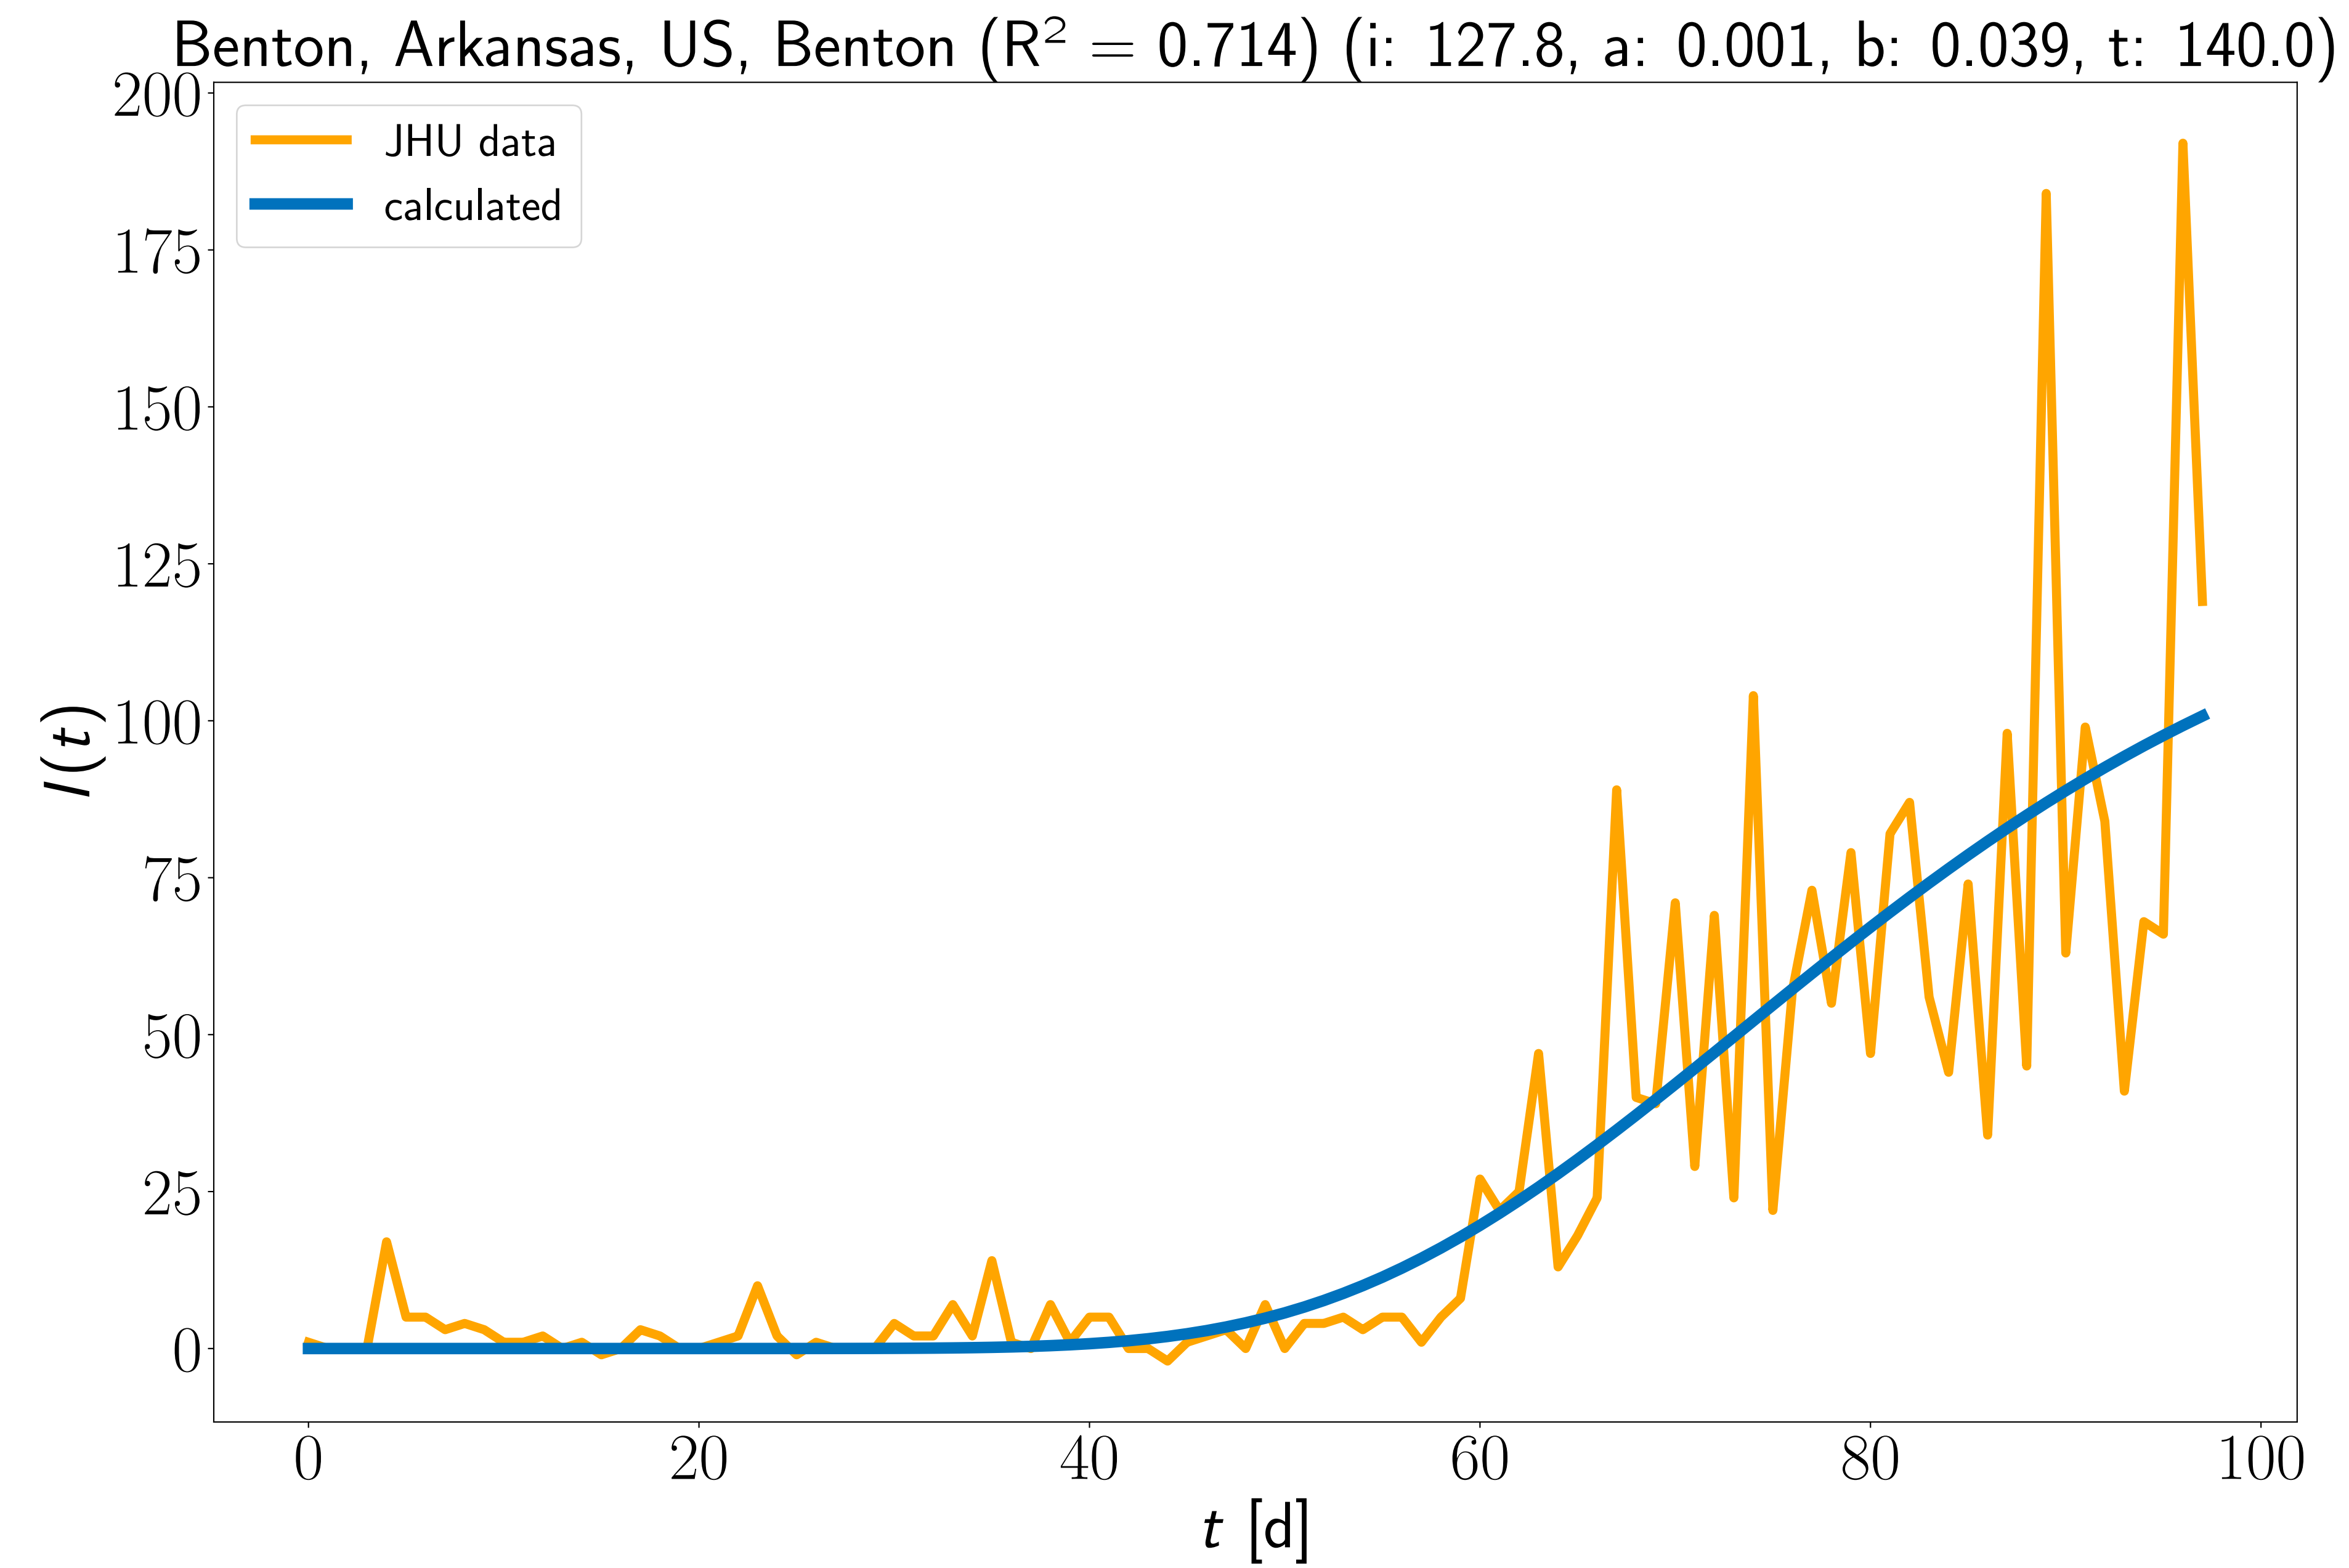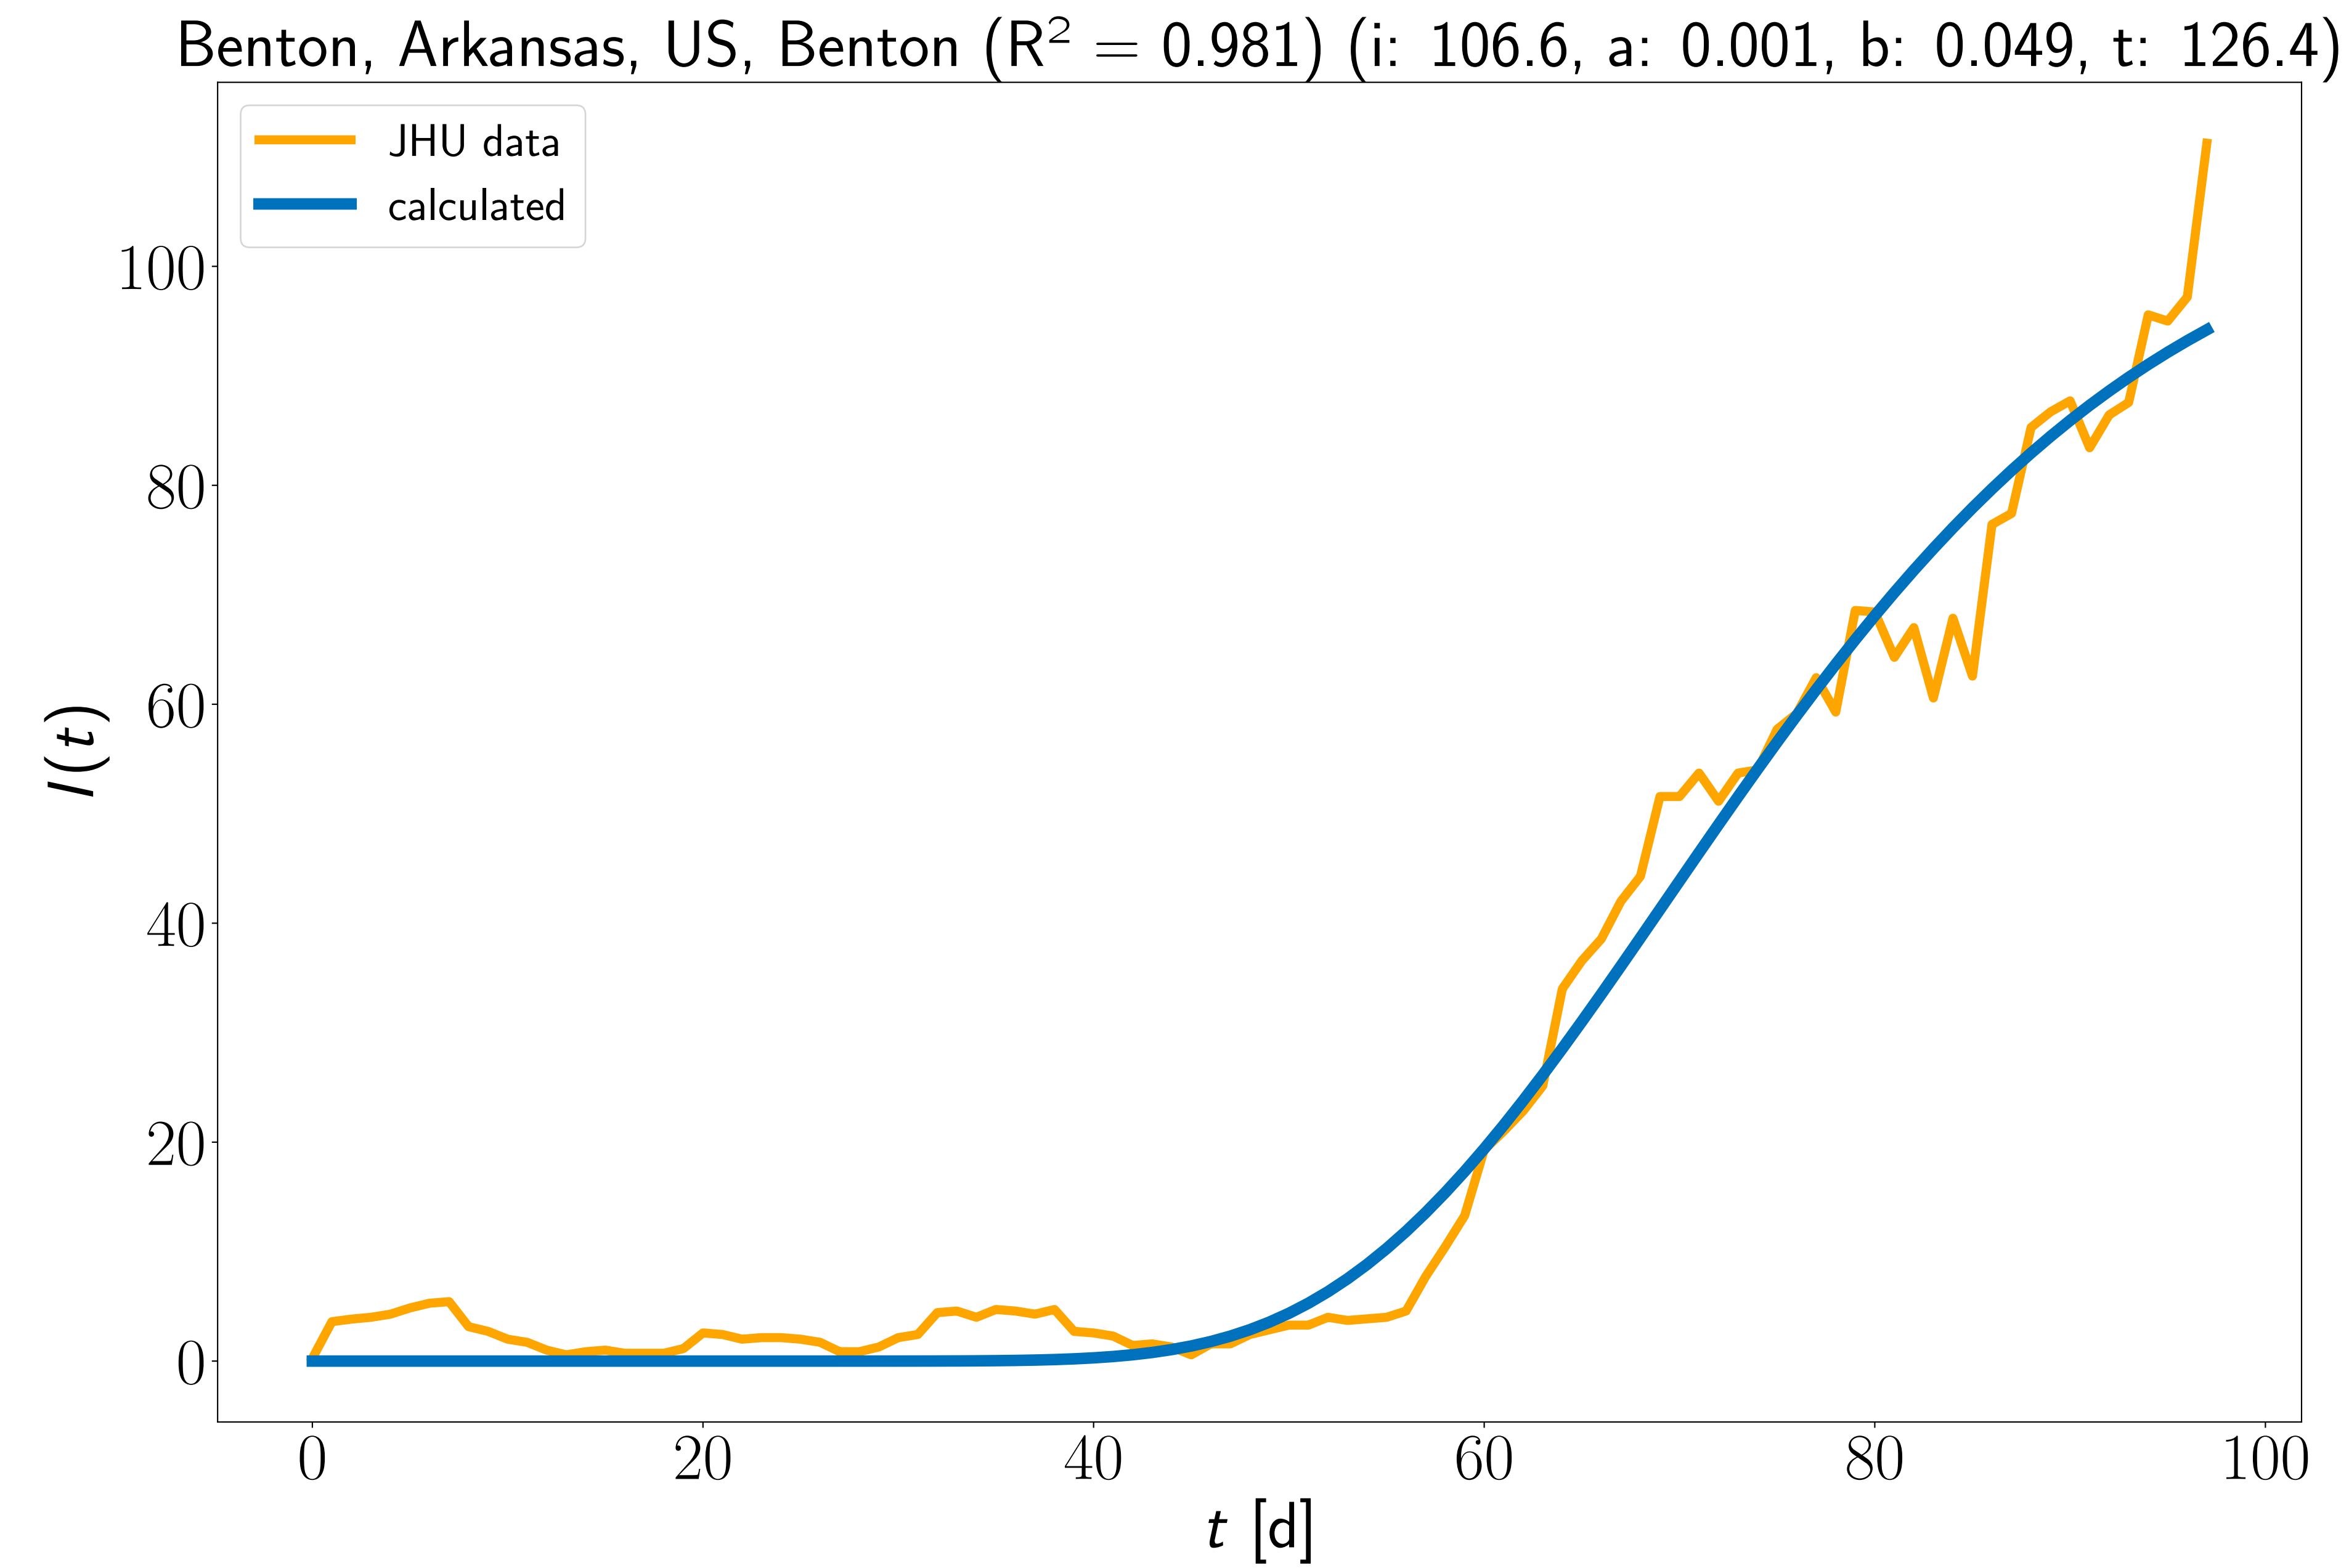

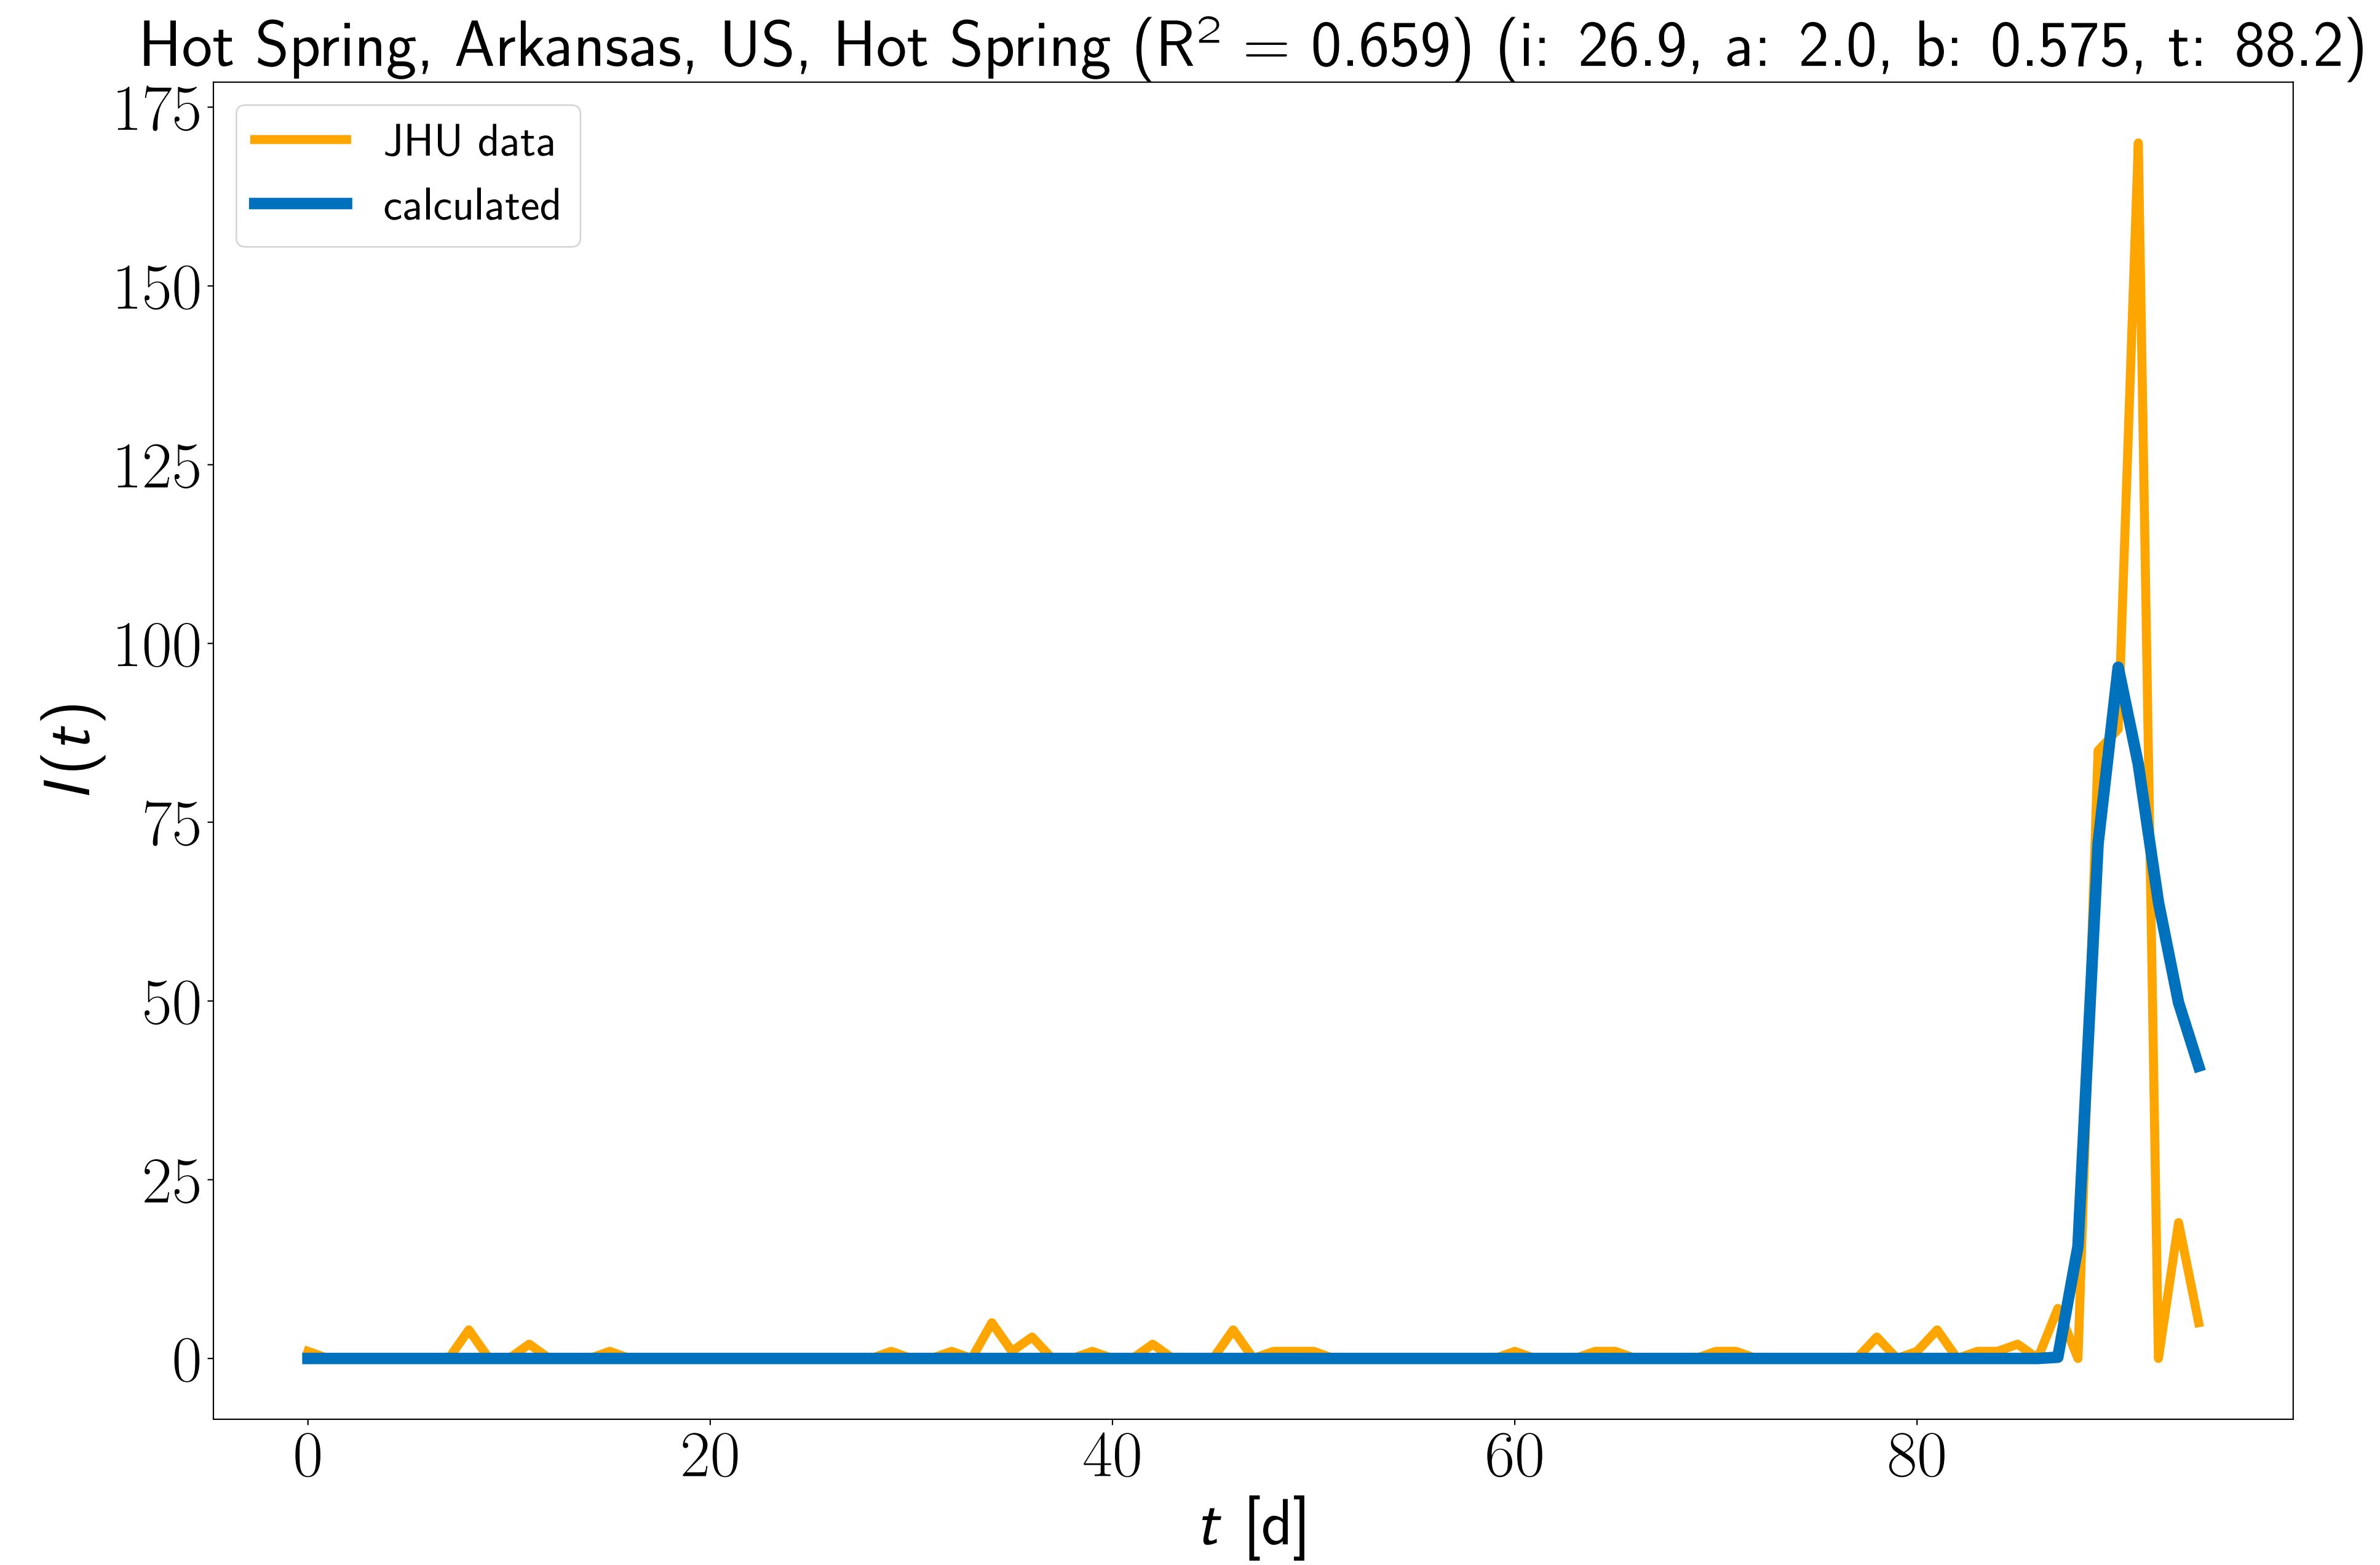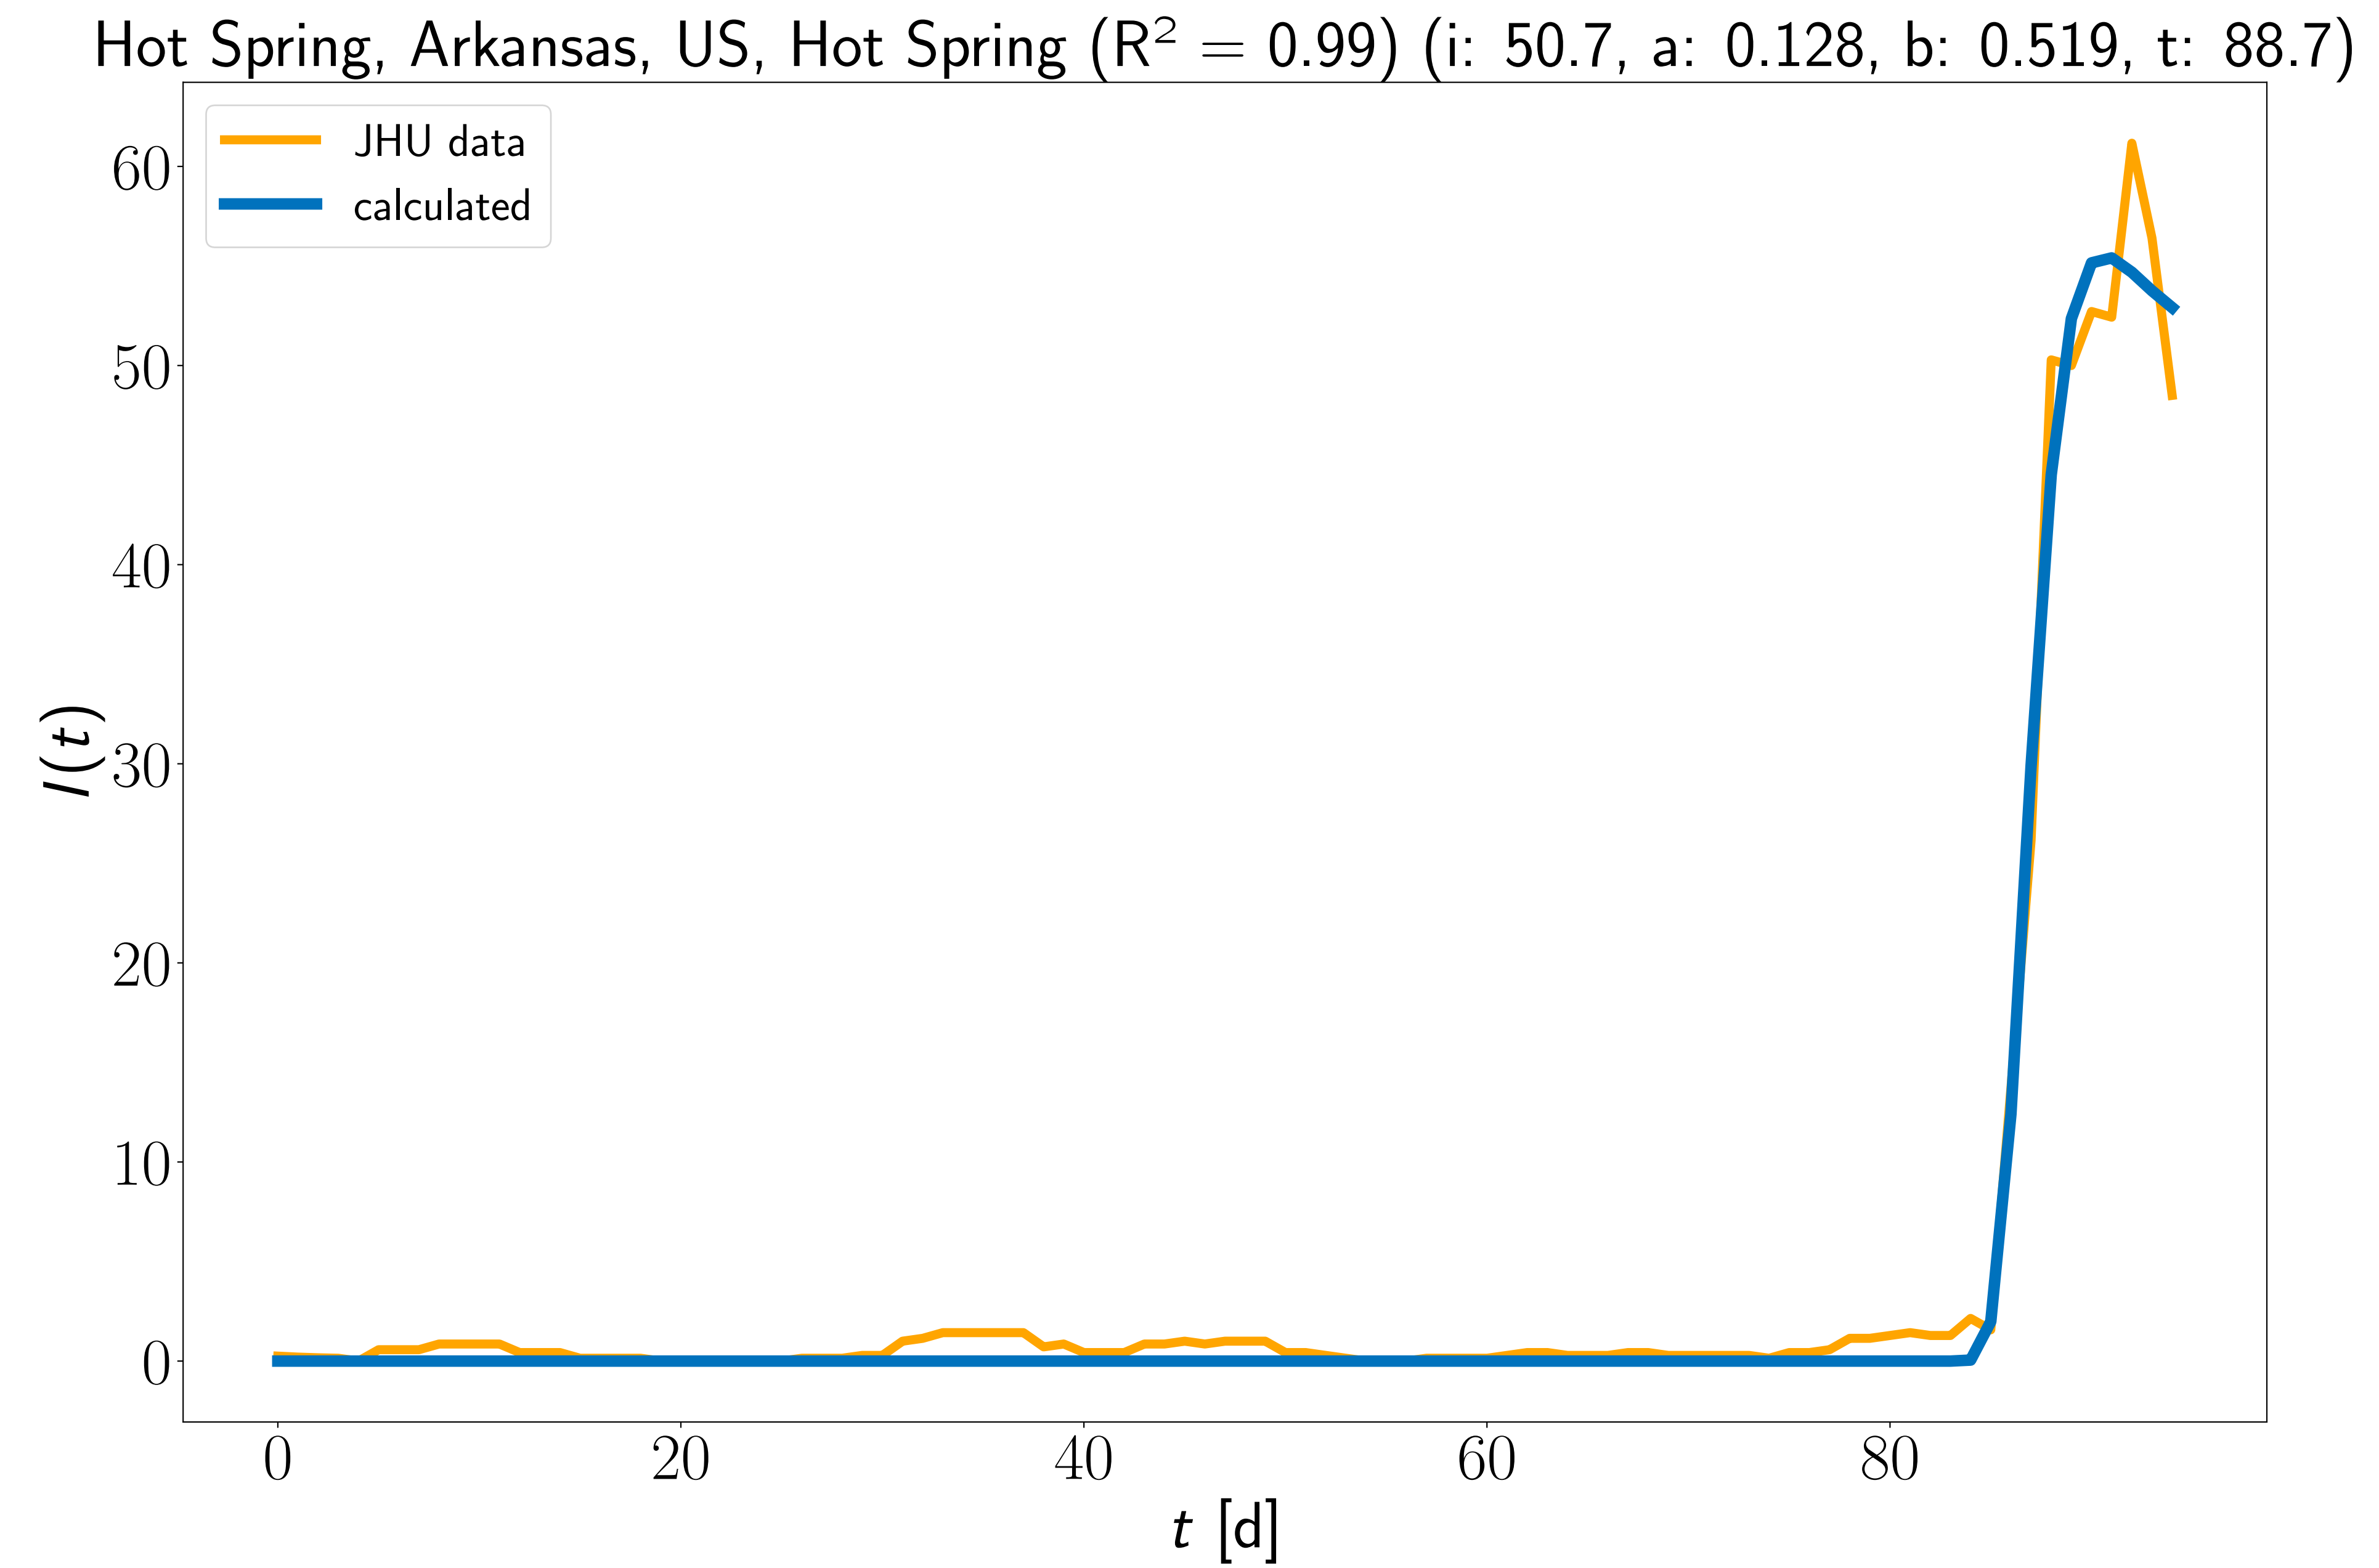

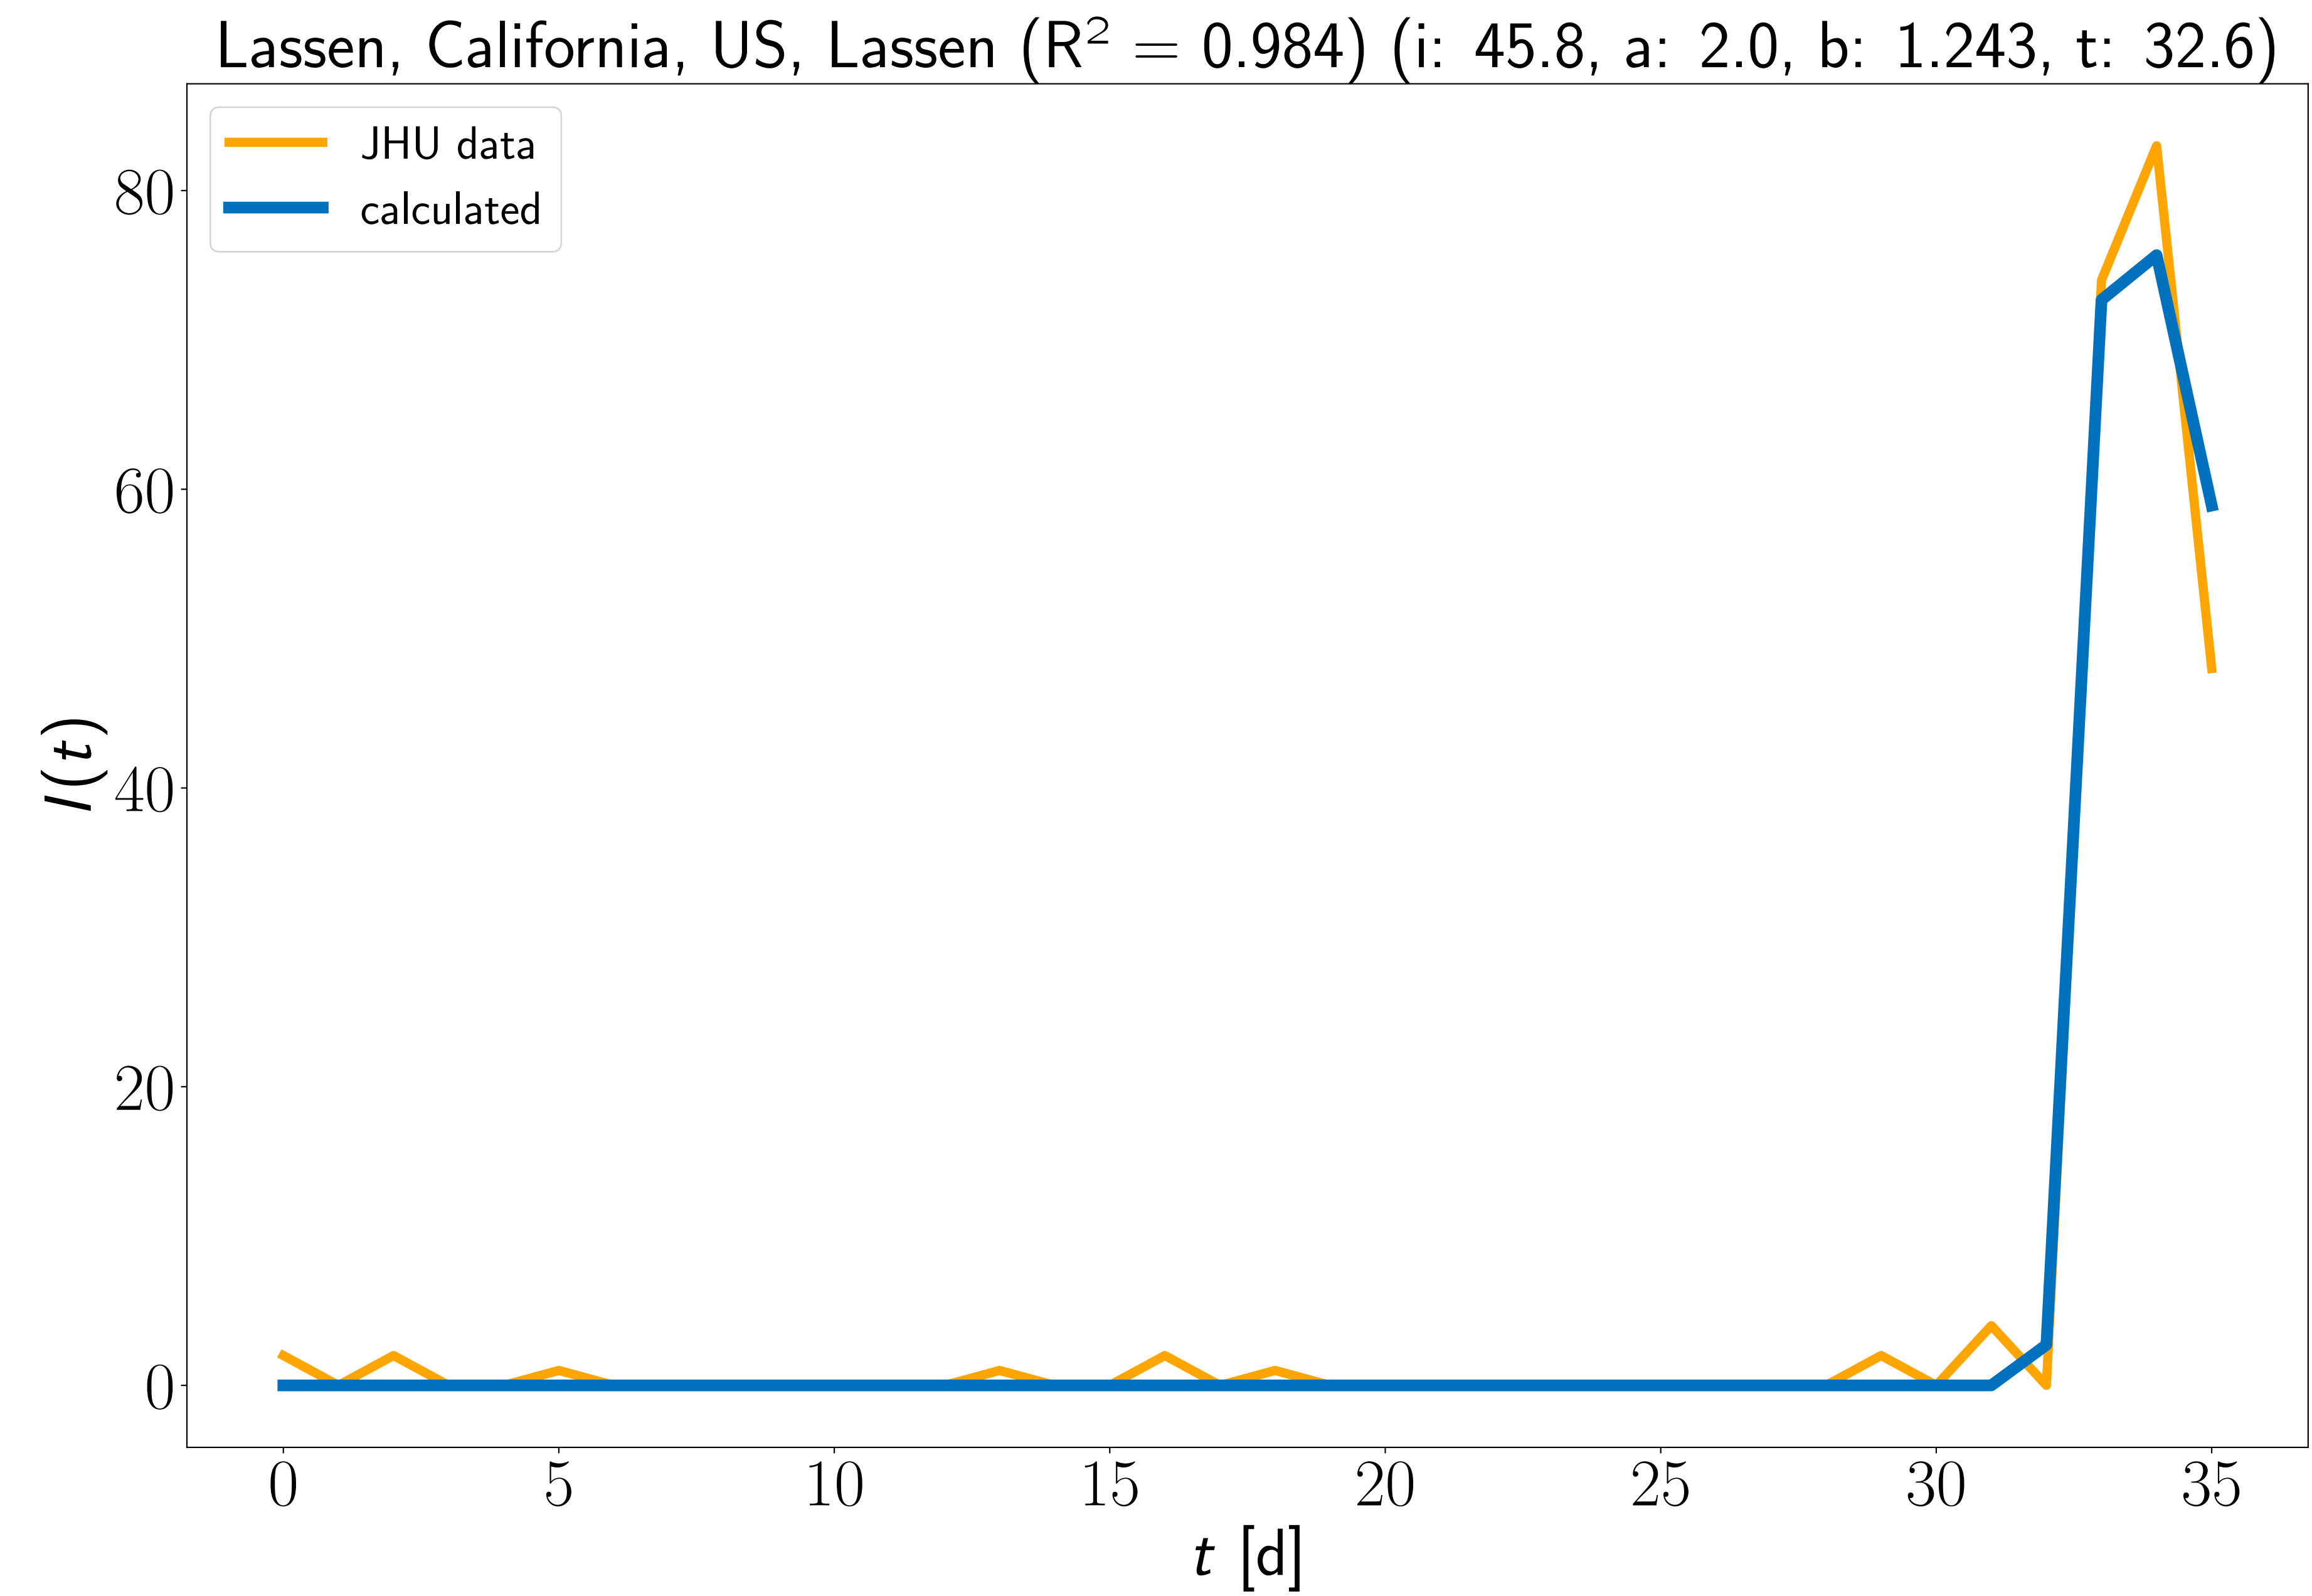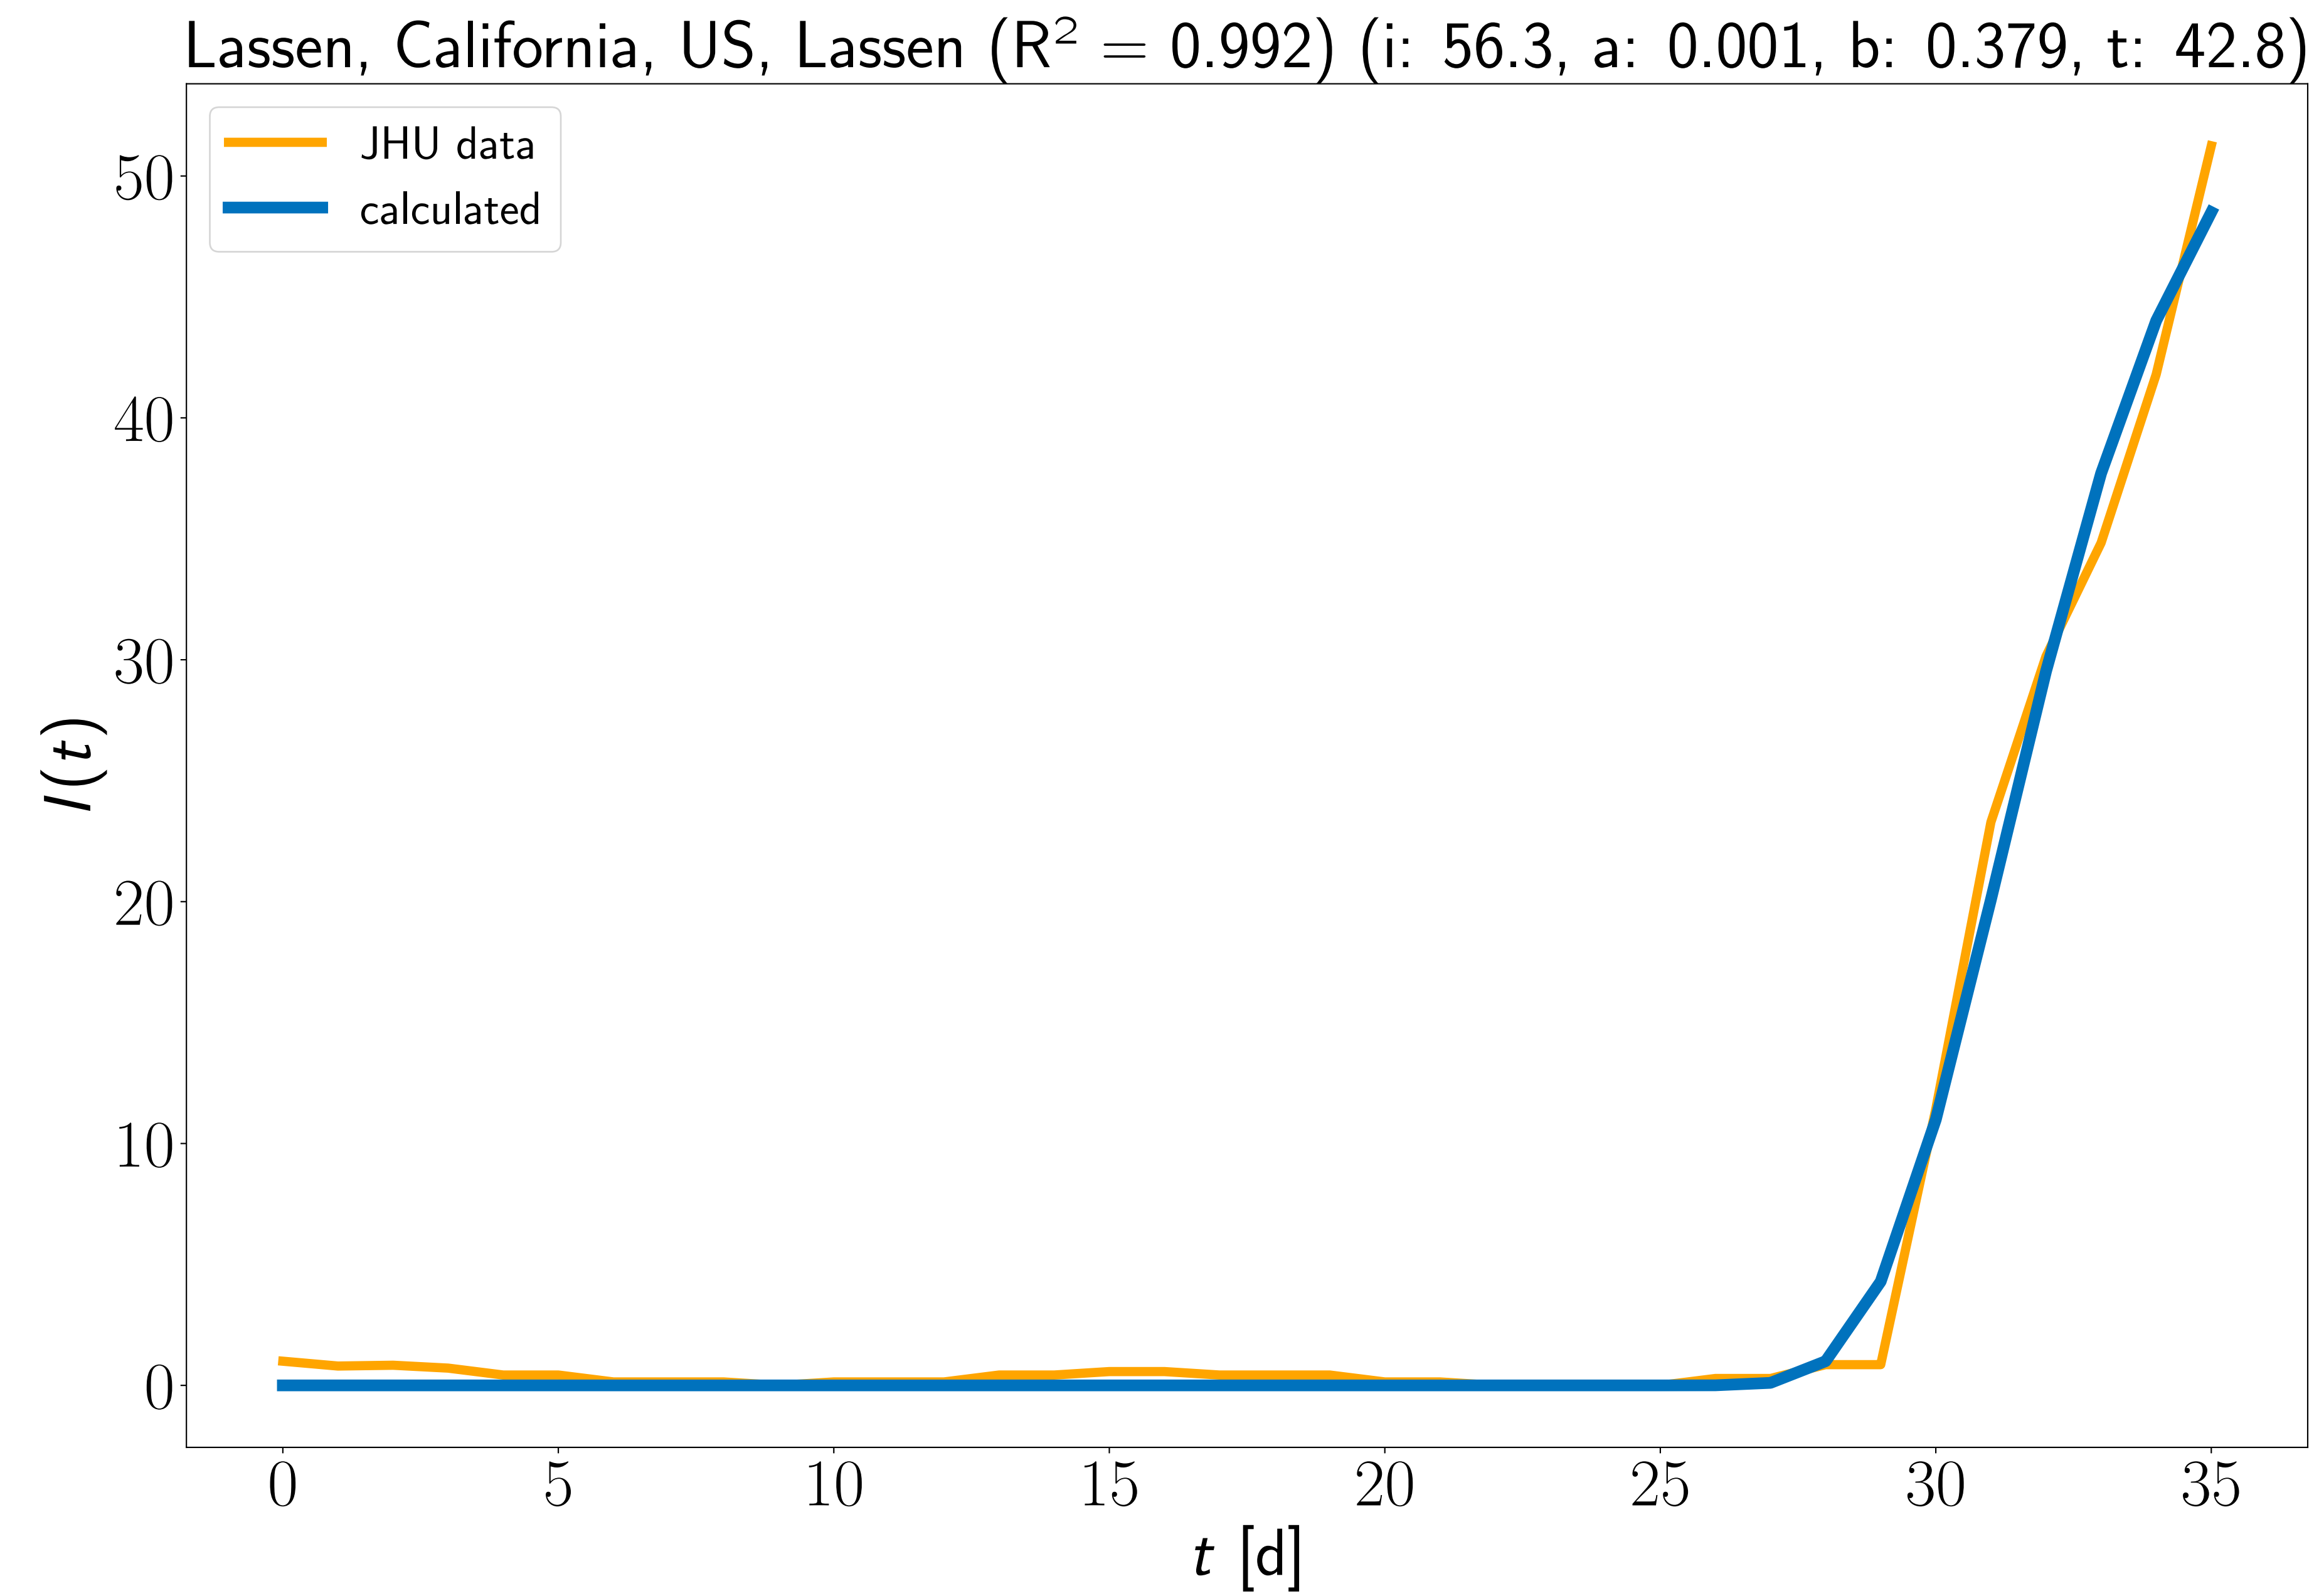

Hillsborough, Florida, US, Hillsborough ( $R^2 = 0.868$ ) (i: 3000.0, a: 0.125, b: 0.001, t: 127.2)

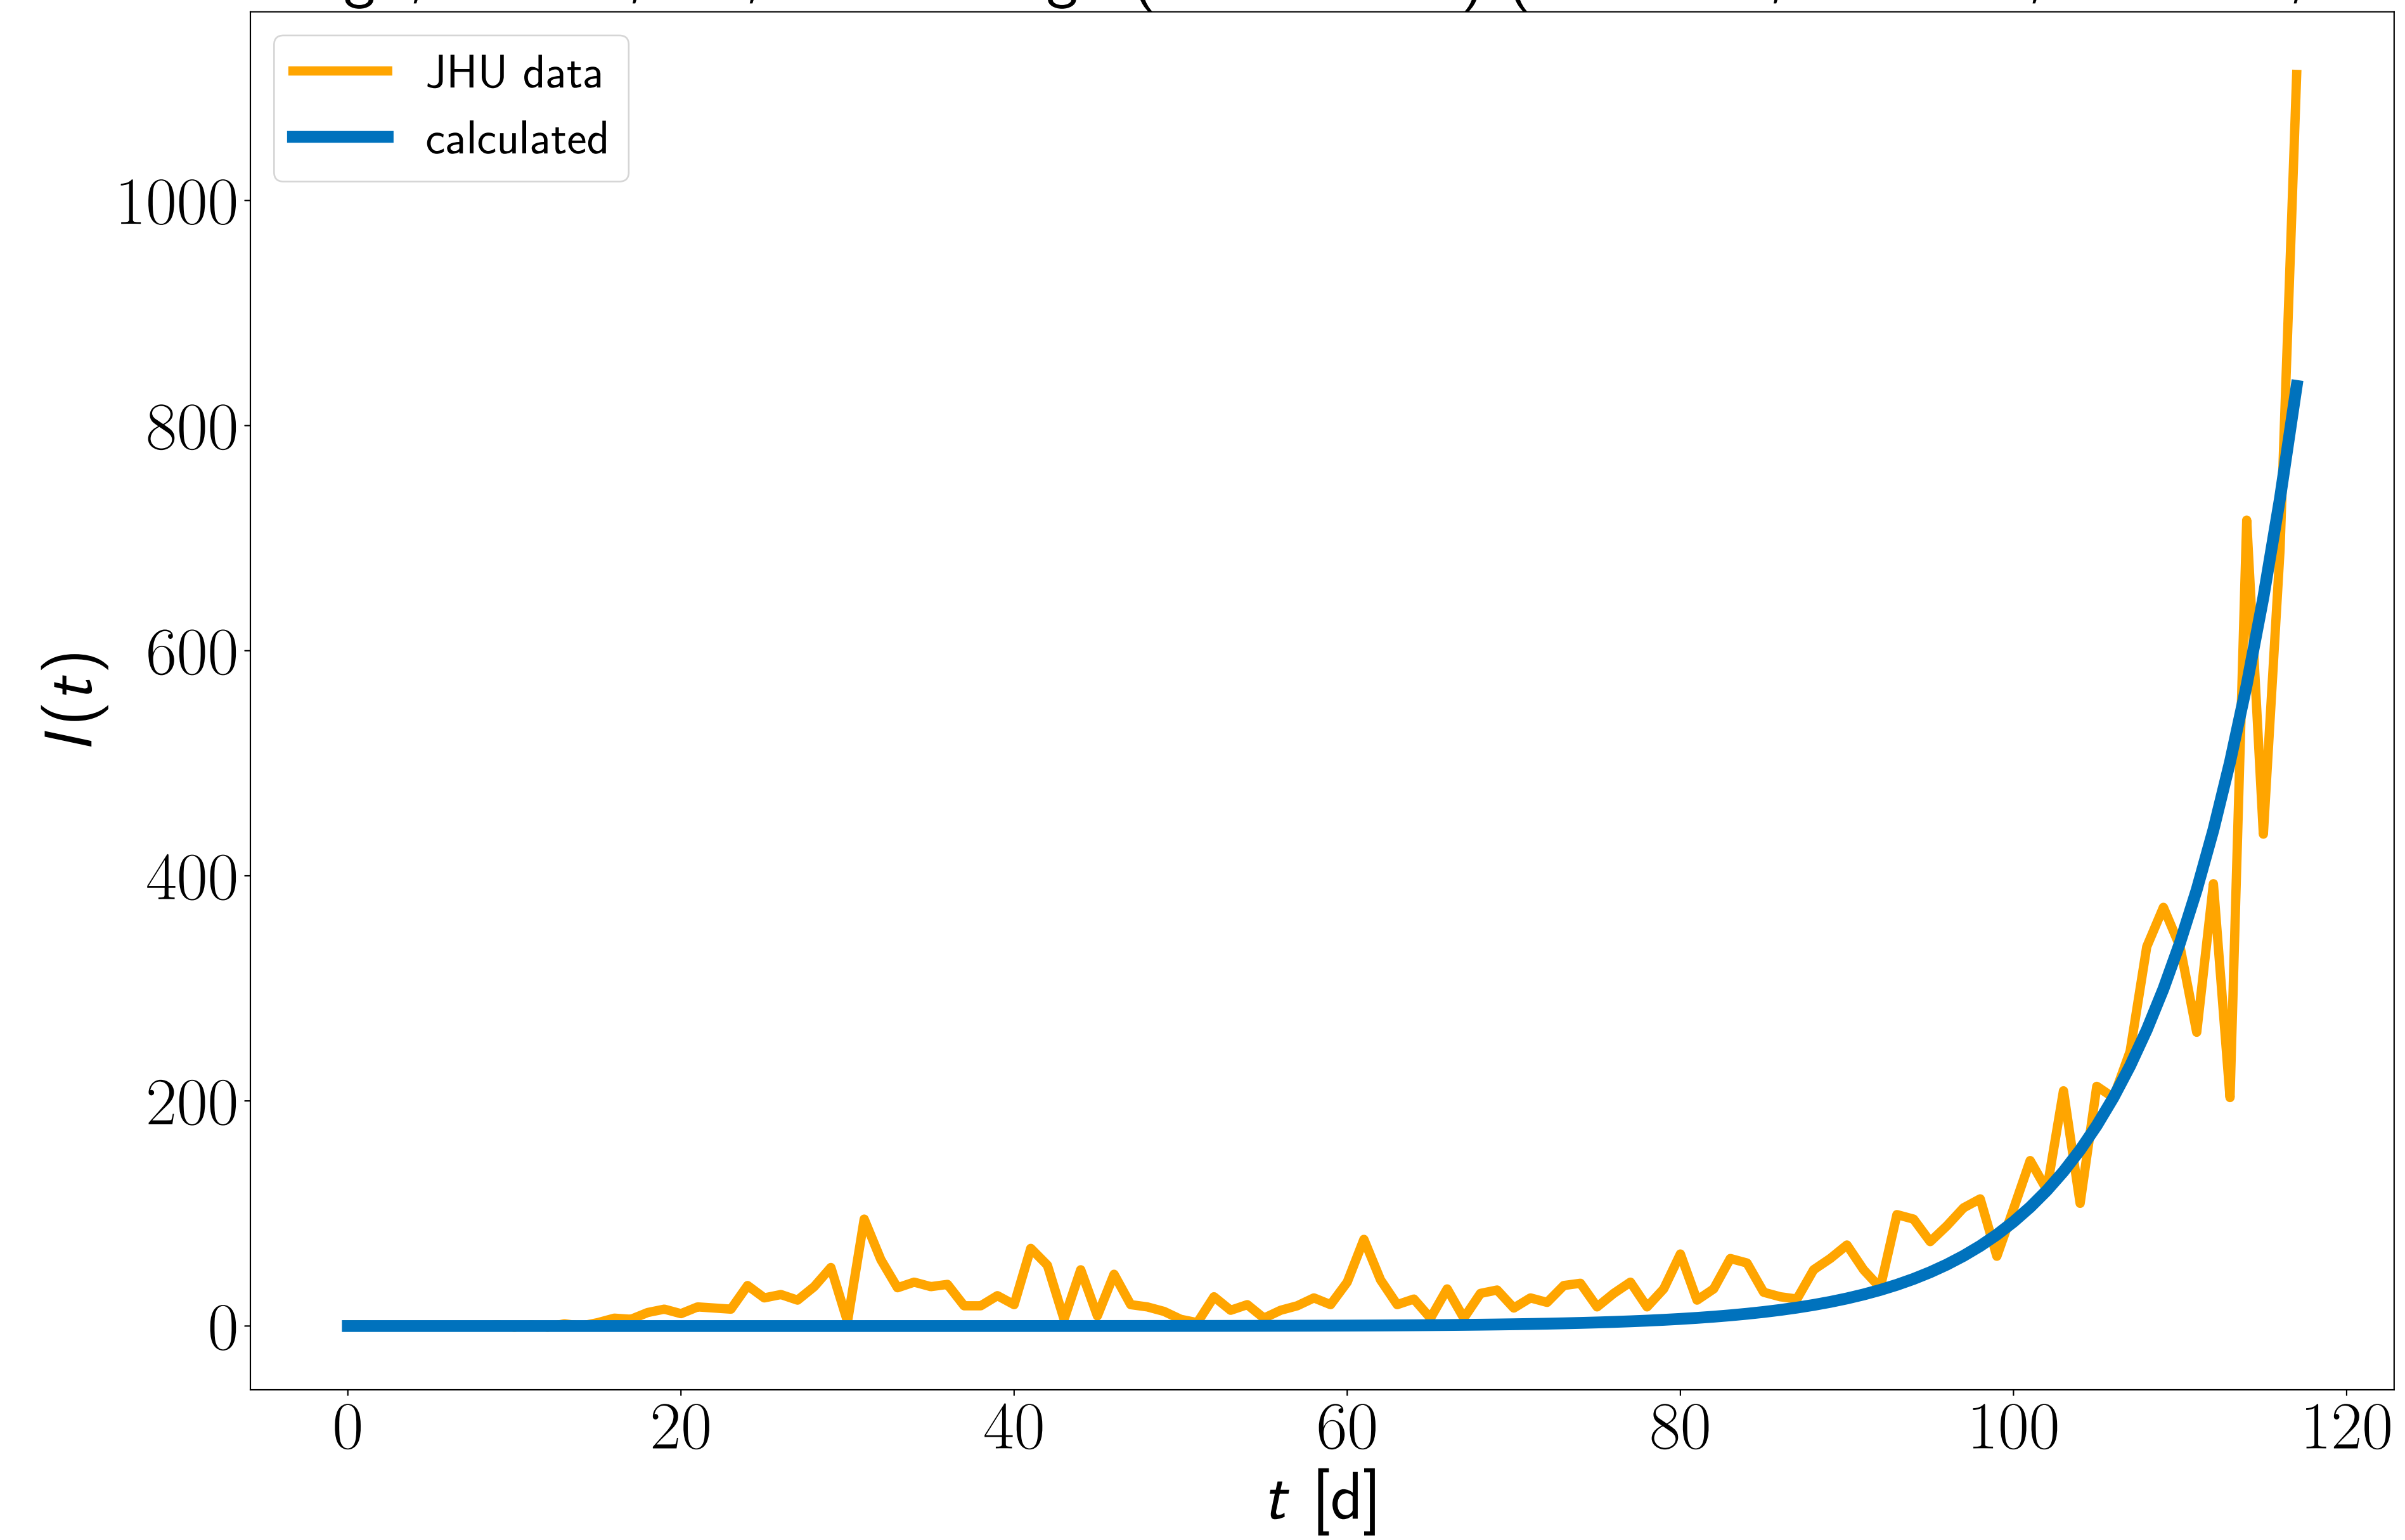

Hillsborough, Florida, US, Hillsborough ( $R^2 = 0.973$ ) (i: 3000.0, a: 0.096, b: 0.001, t: 131.9)

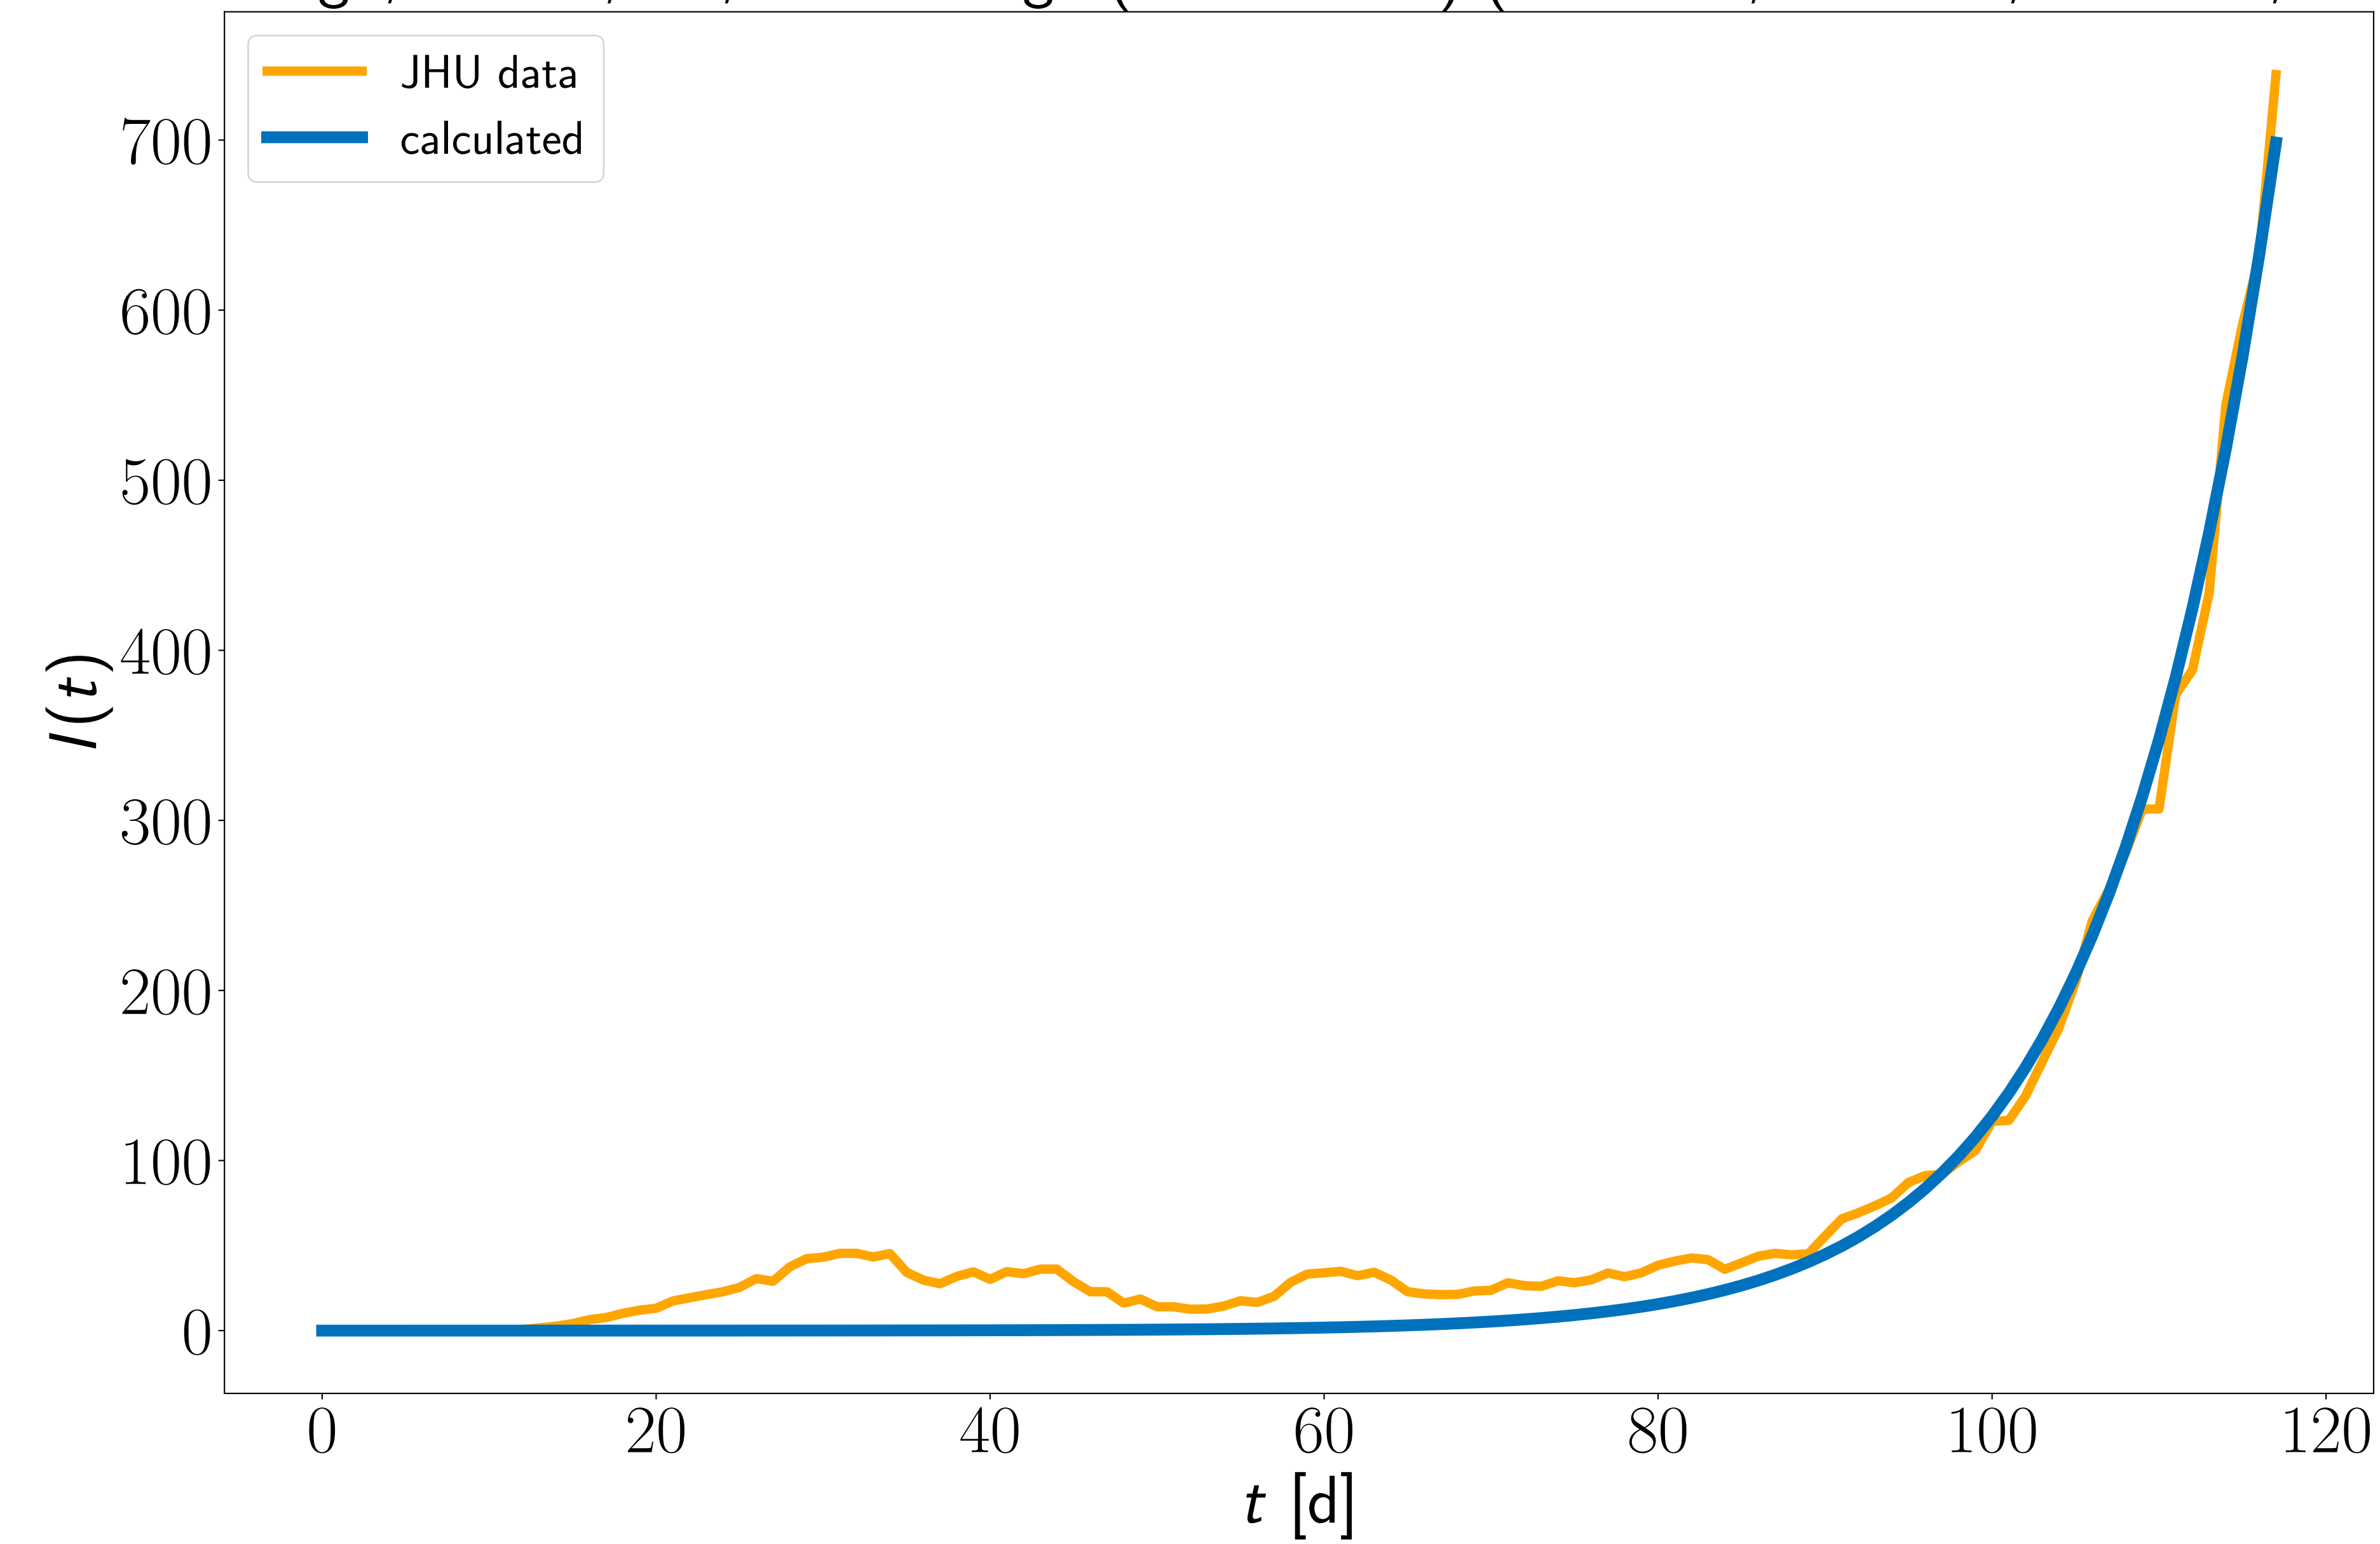

Orange, Florida, US, Orange ( $R^2 = 0.92$ ) (i: 2996.7, a: 0.162, b: 0.001, t: 111.7)

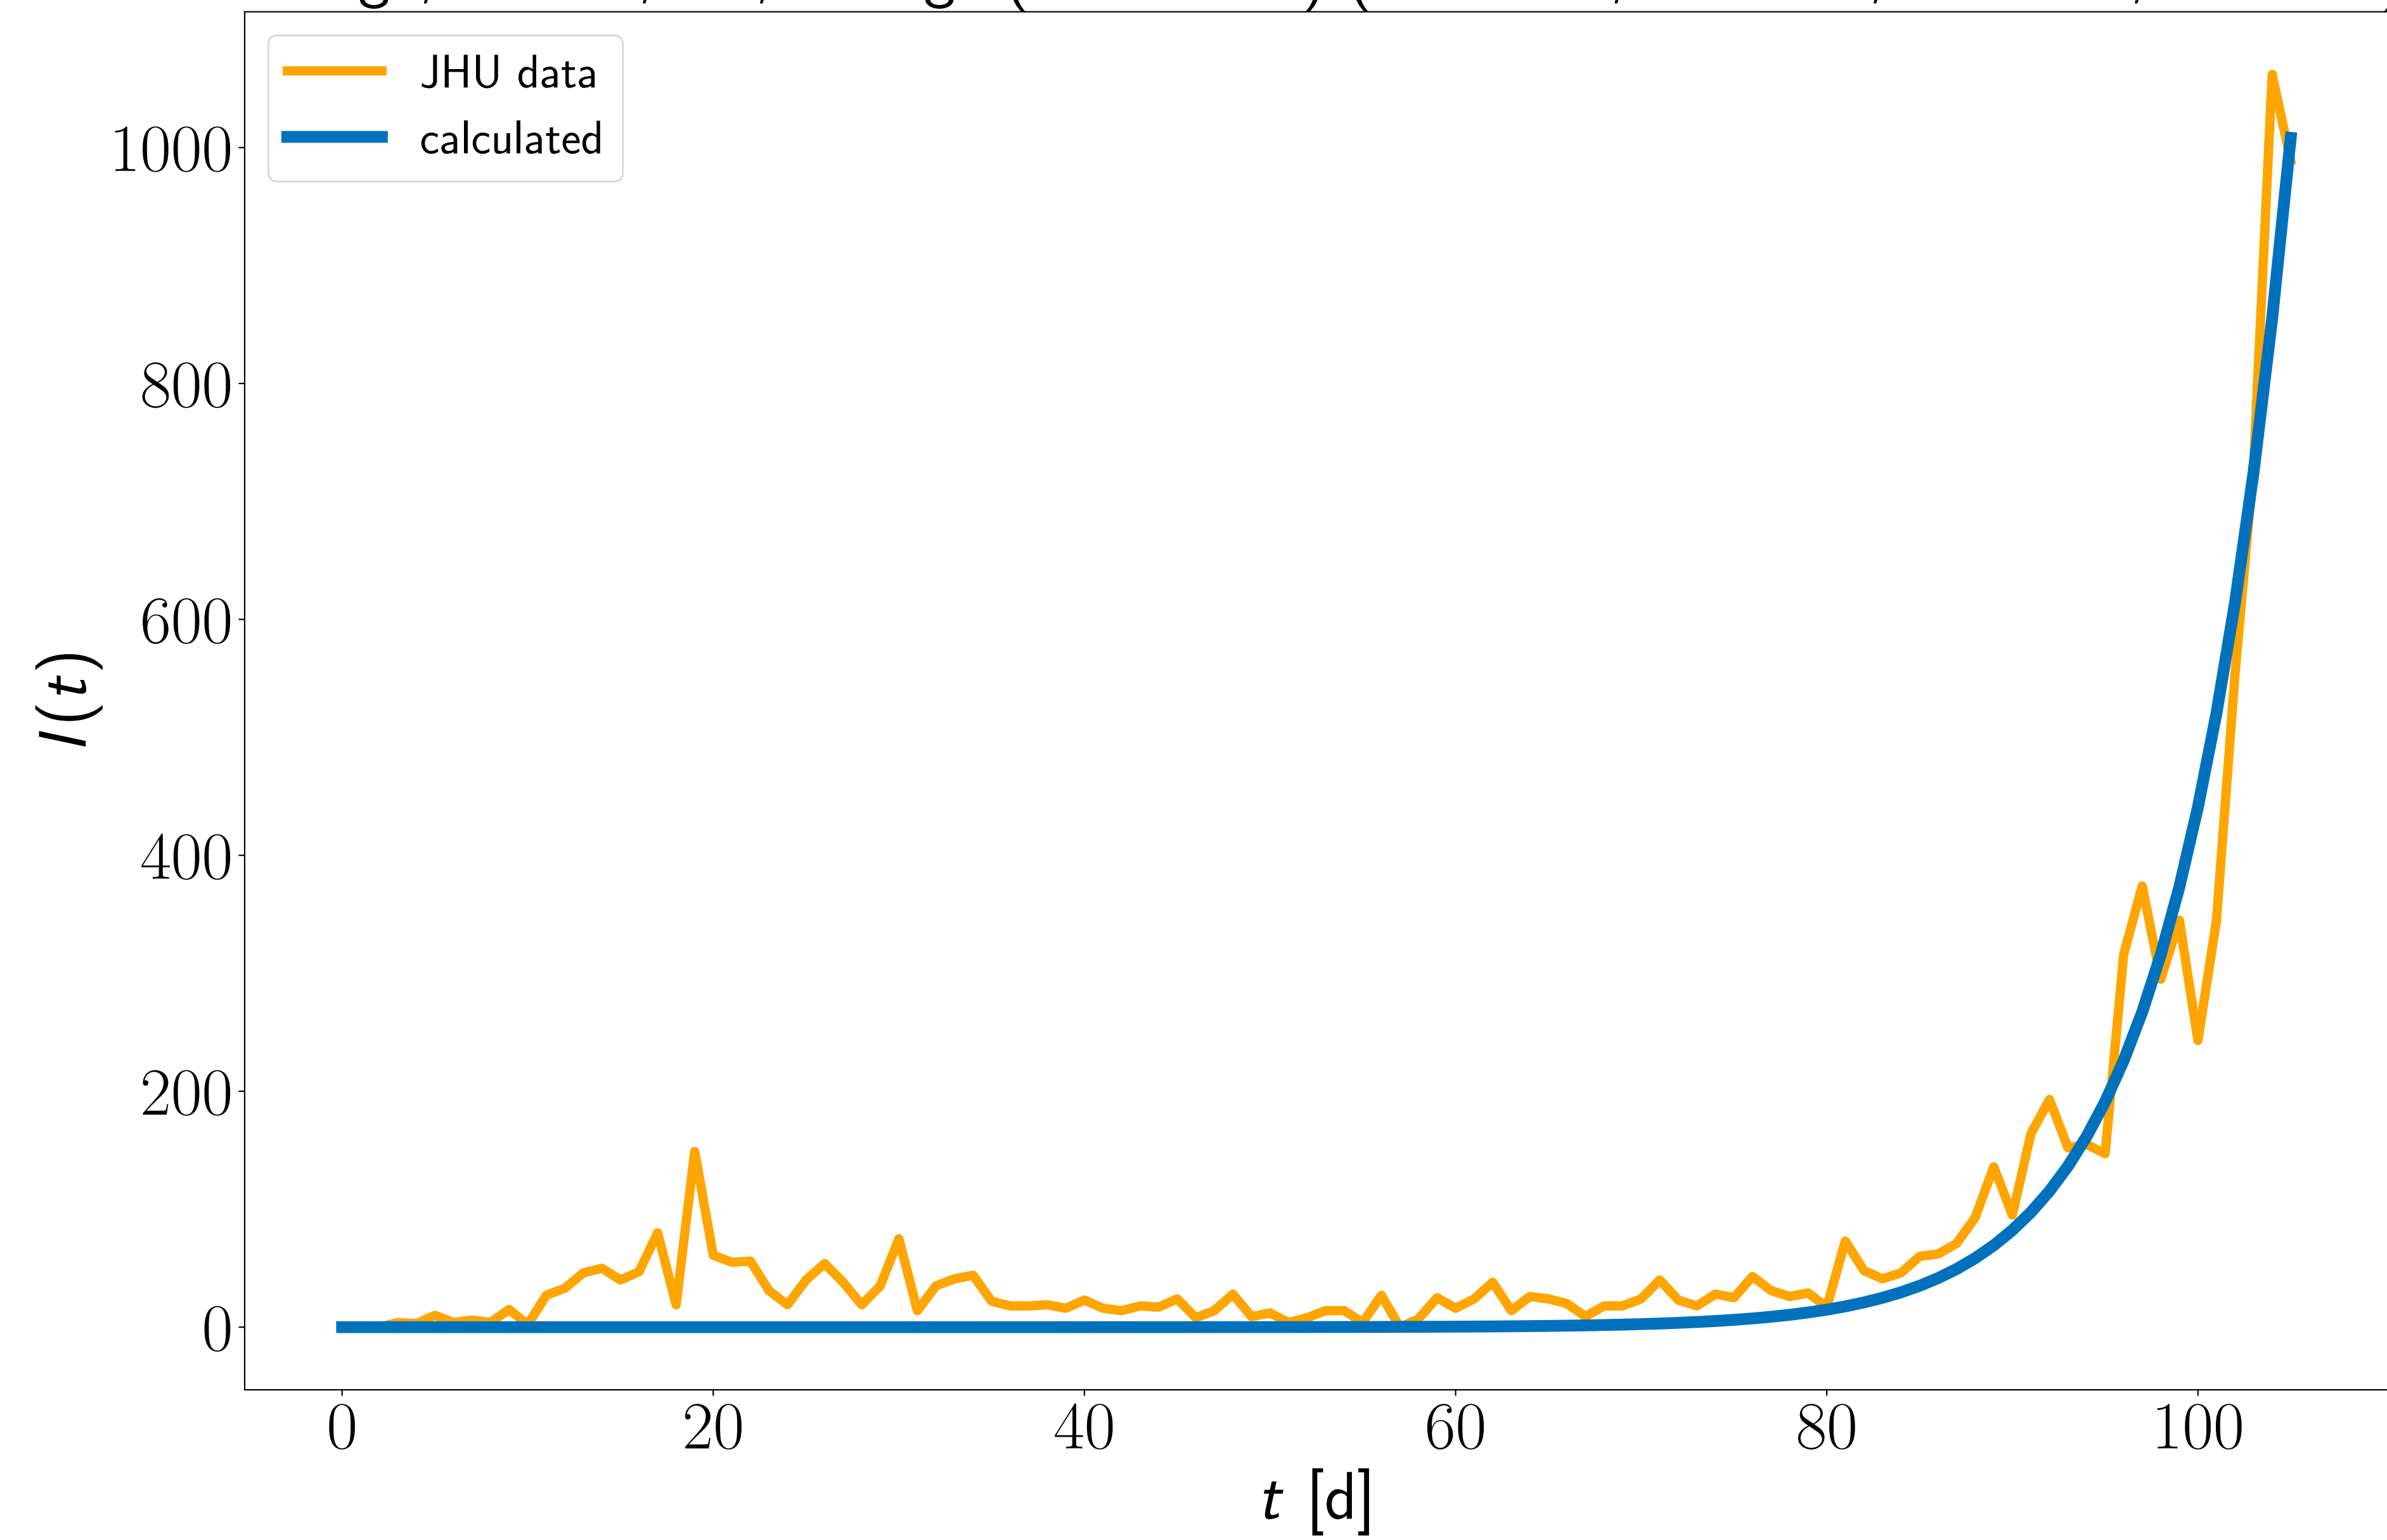

Orange, Florida, US, Orange ( $R^2 = 0.971$ ) (i: 2999.9, a: 0.125, b: 0.001, t: 115.1)

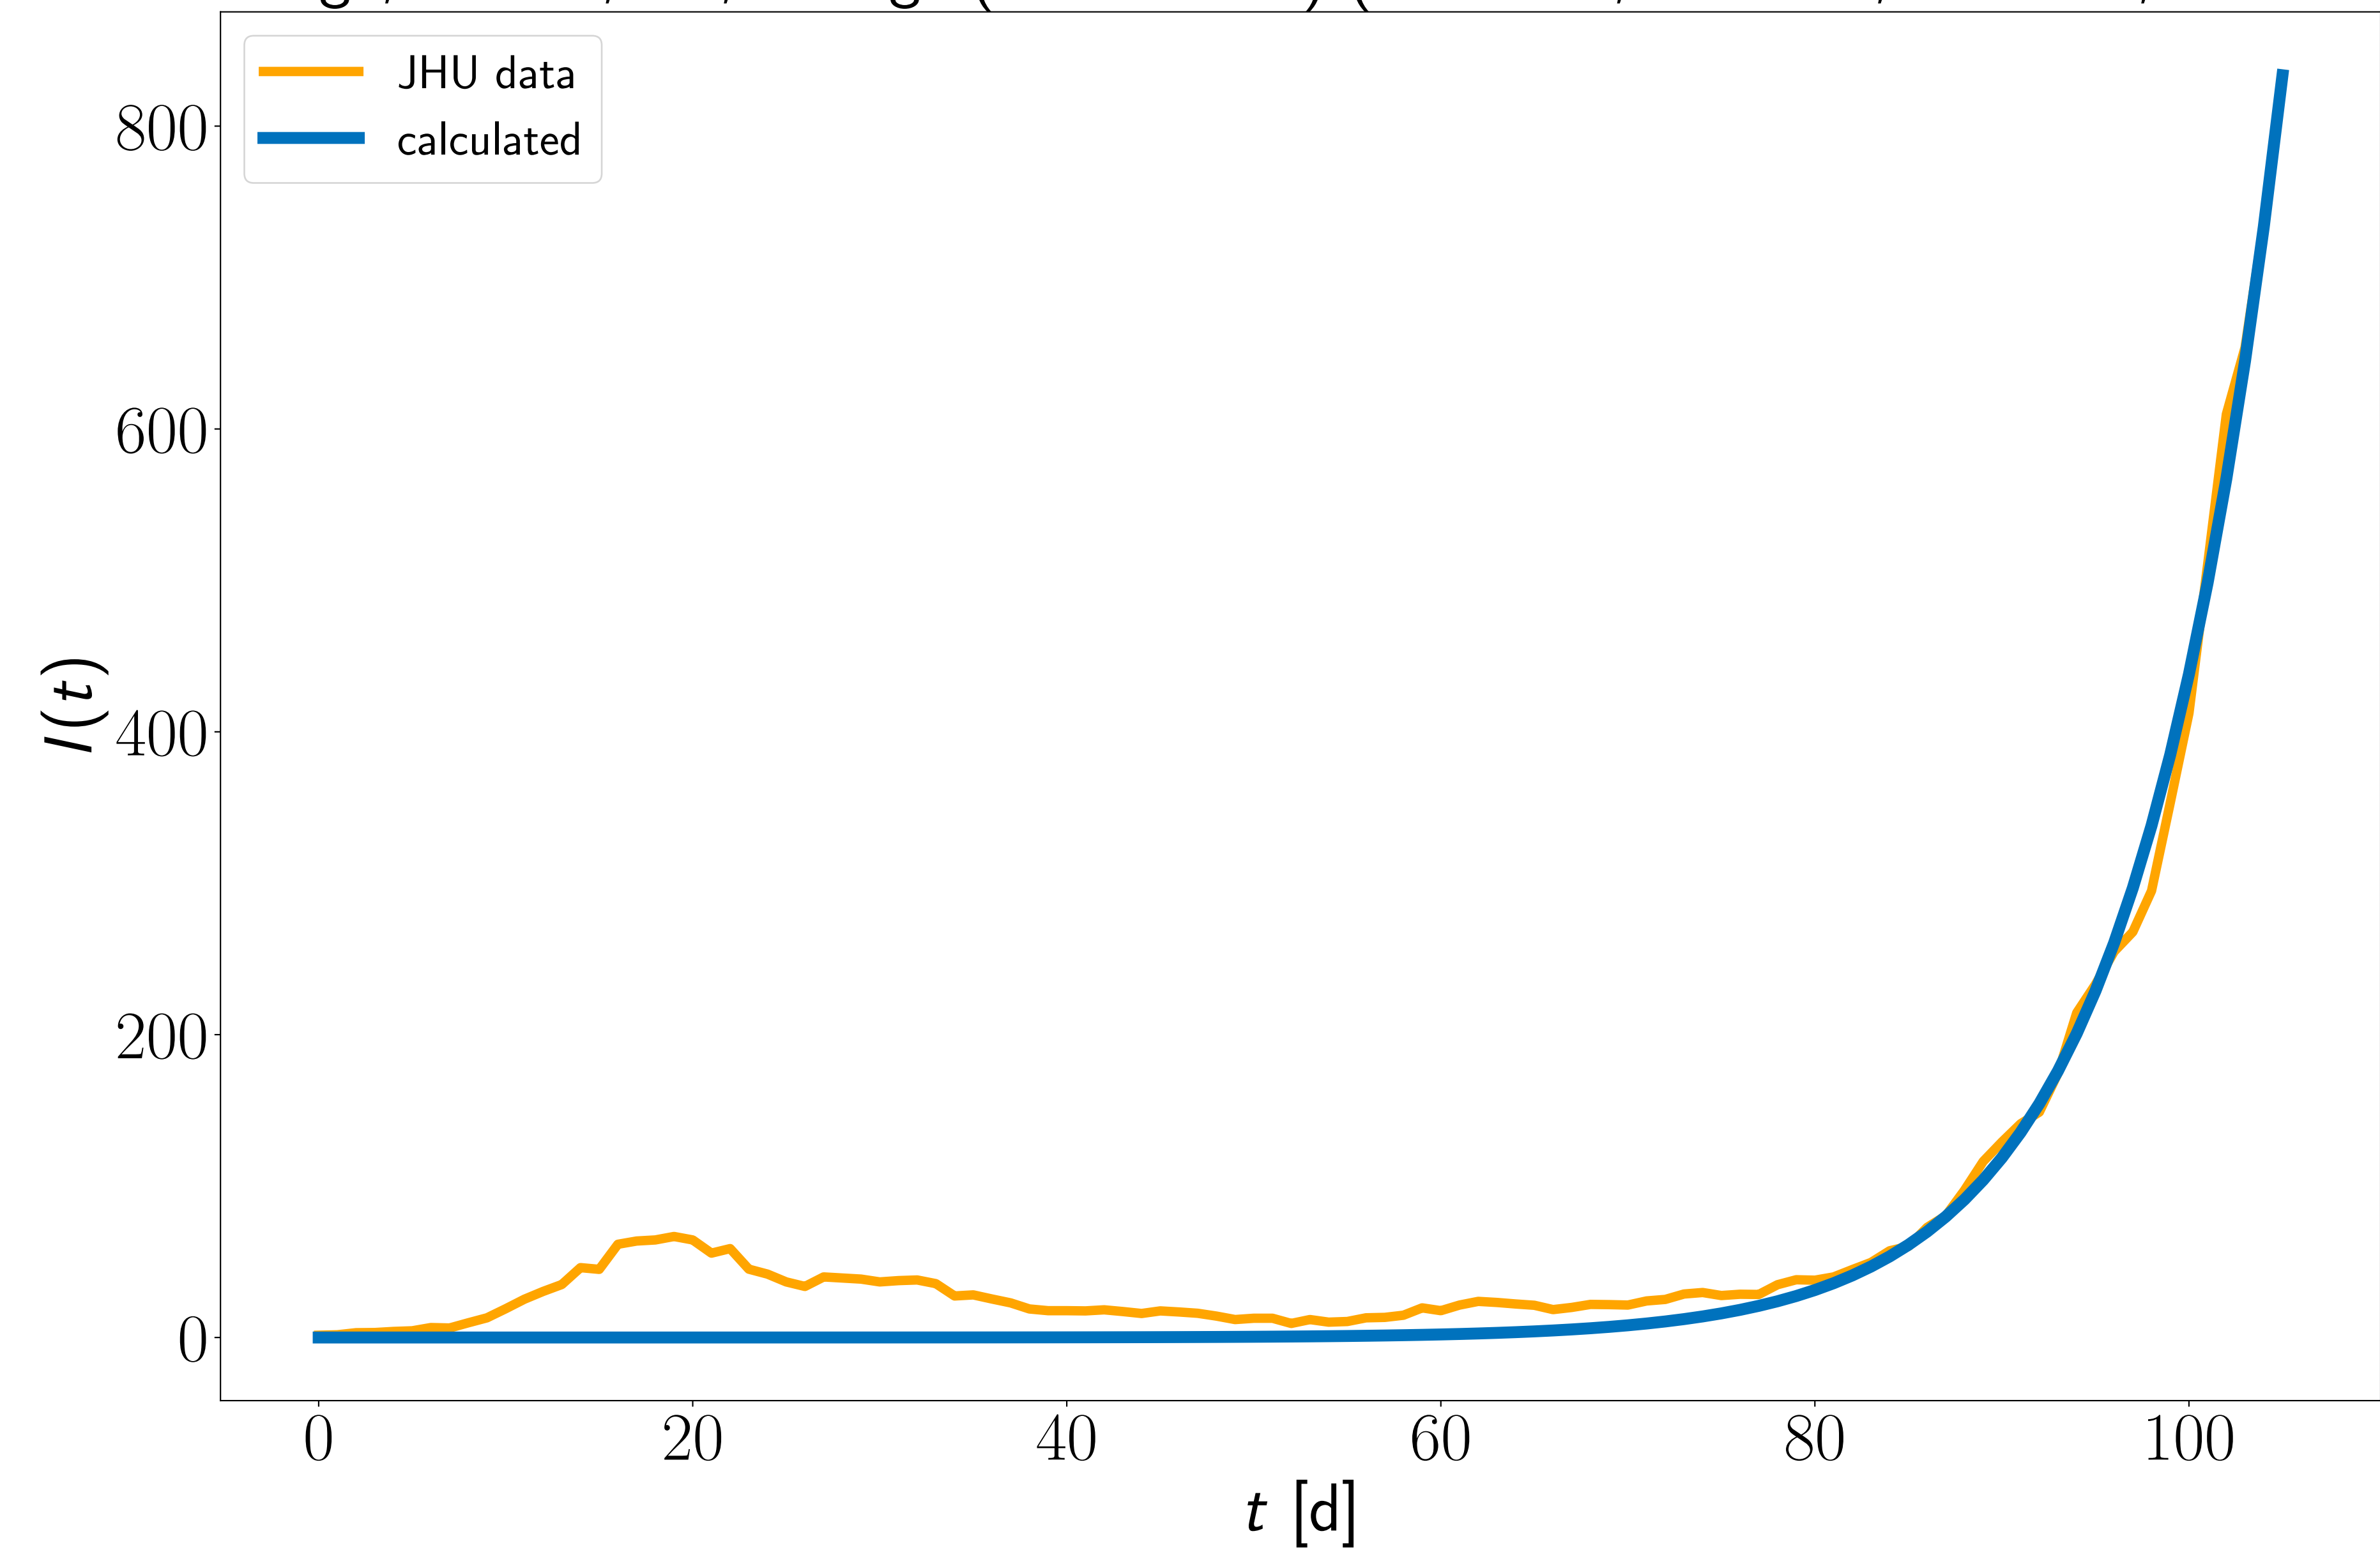

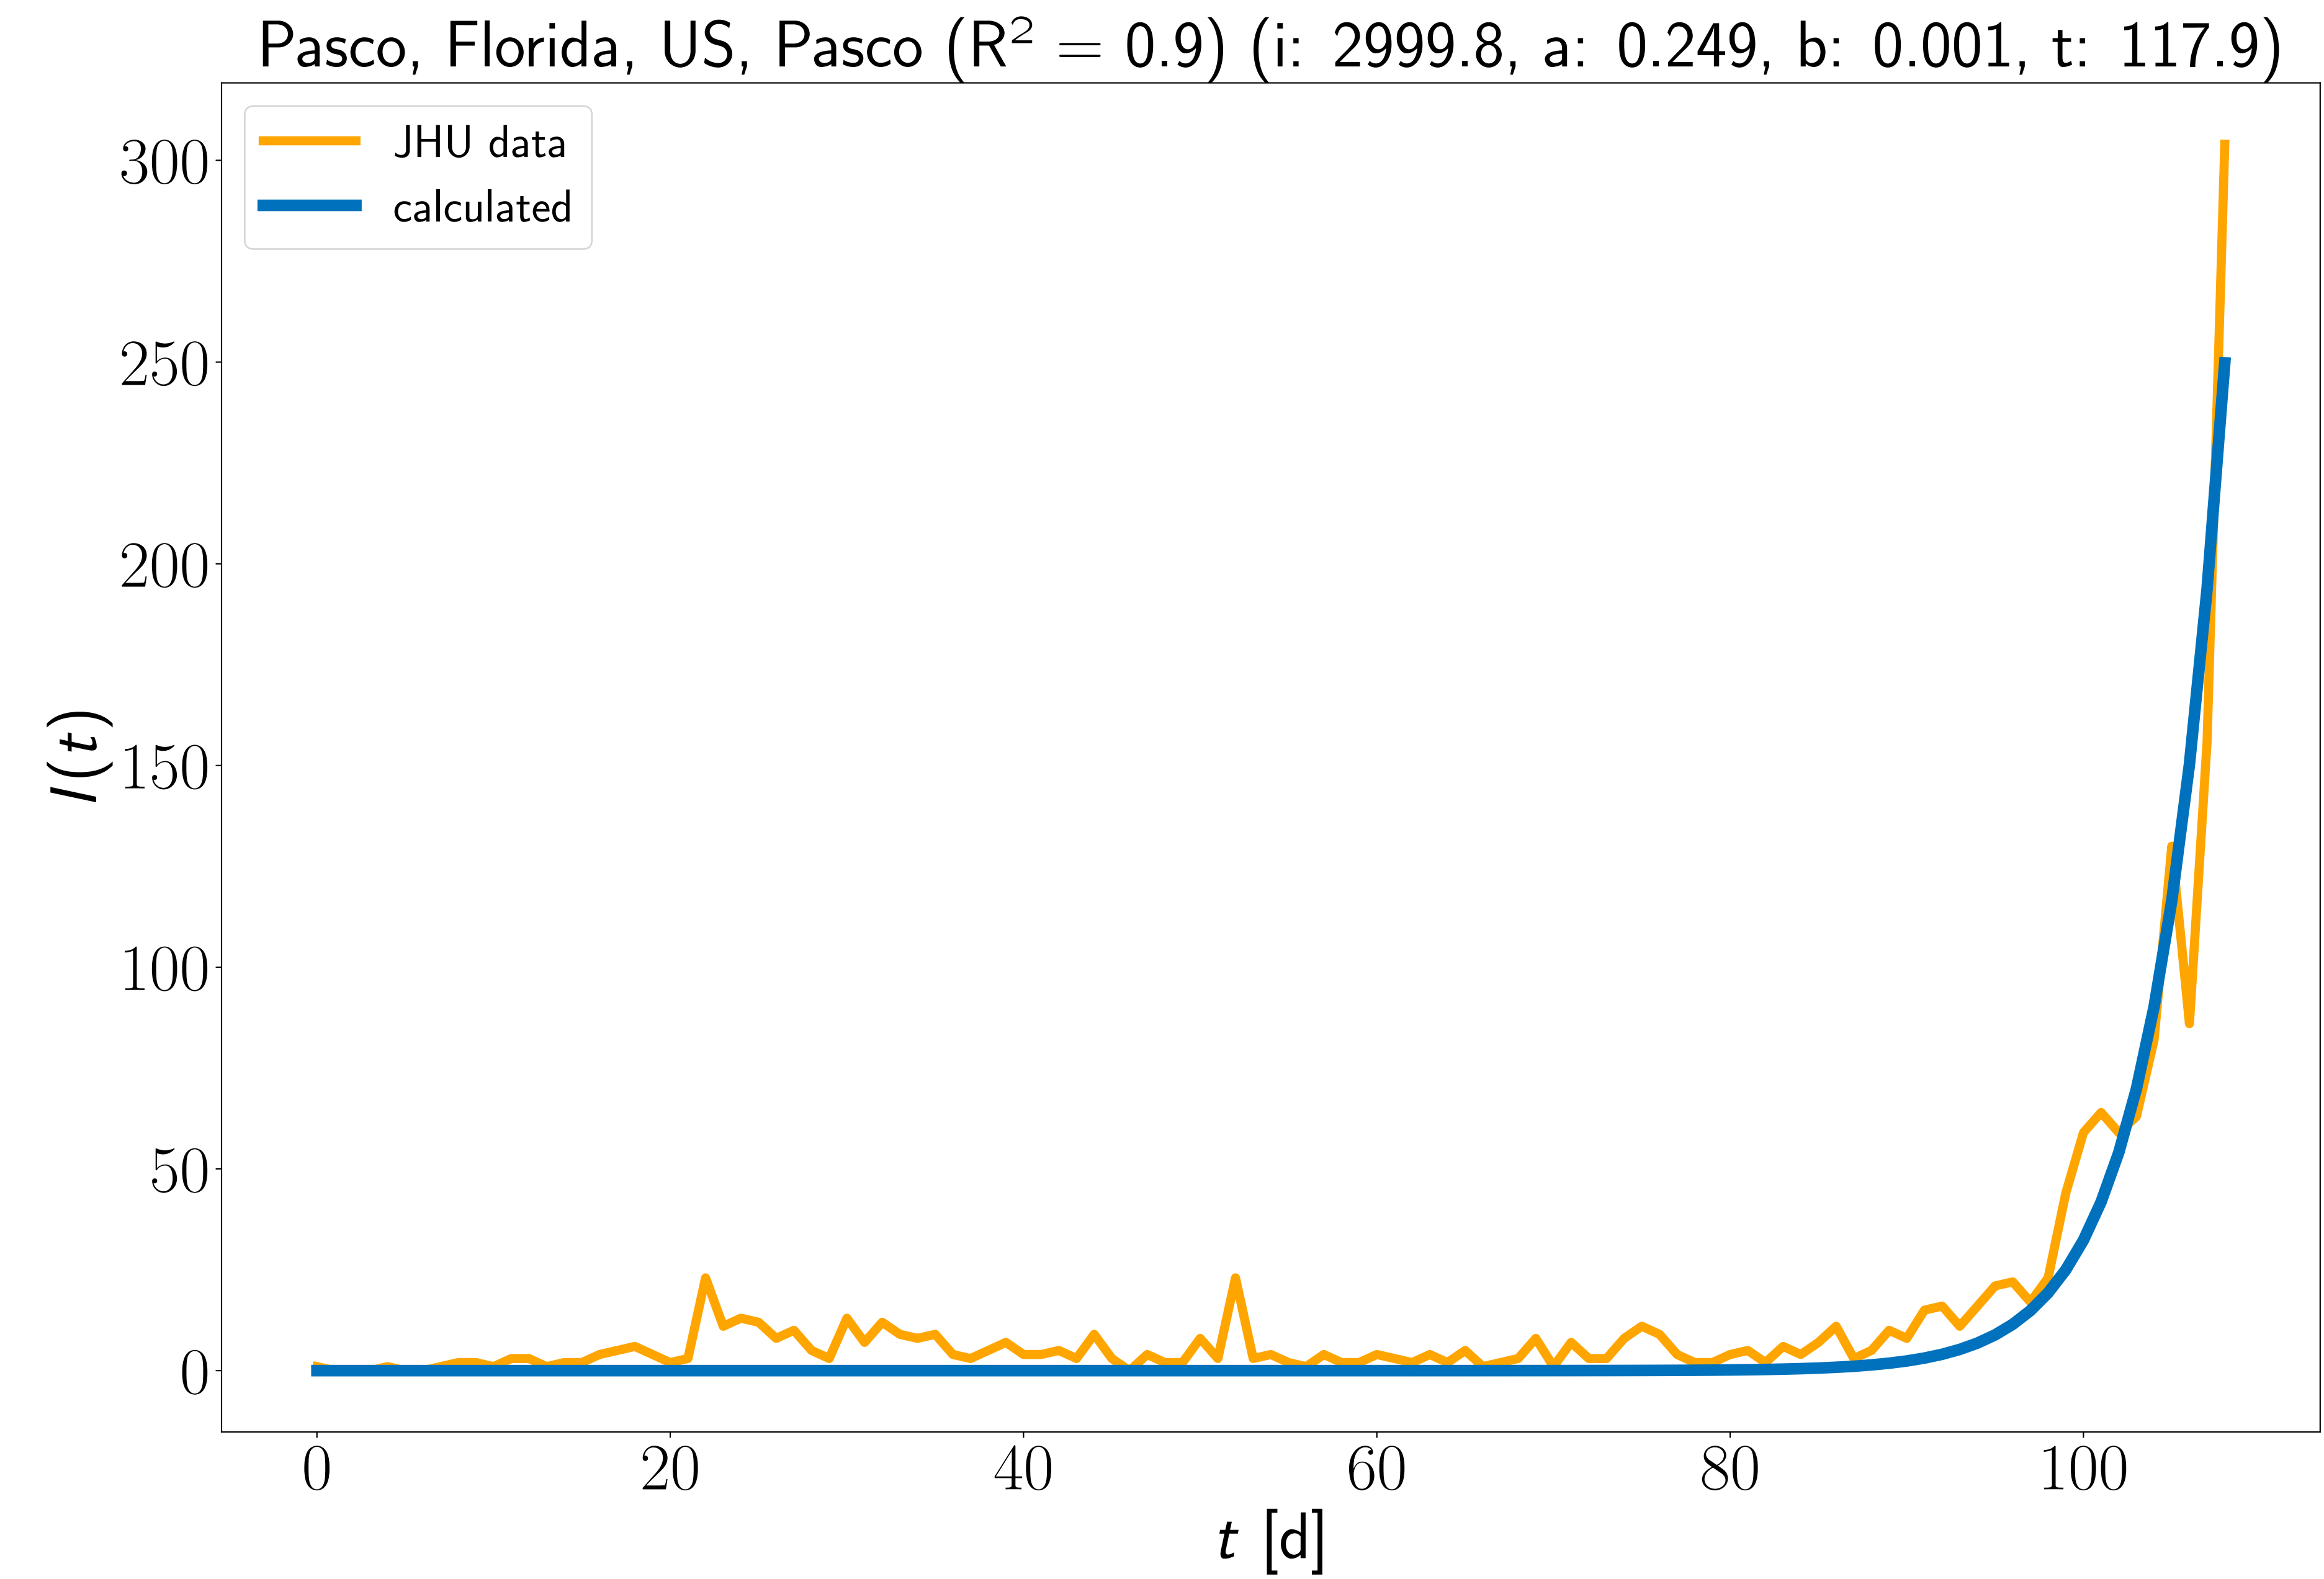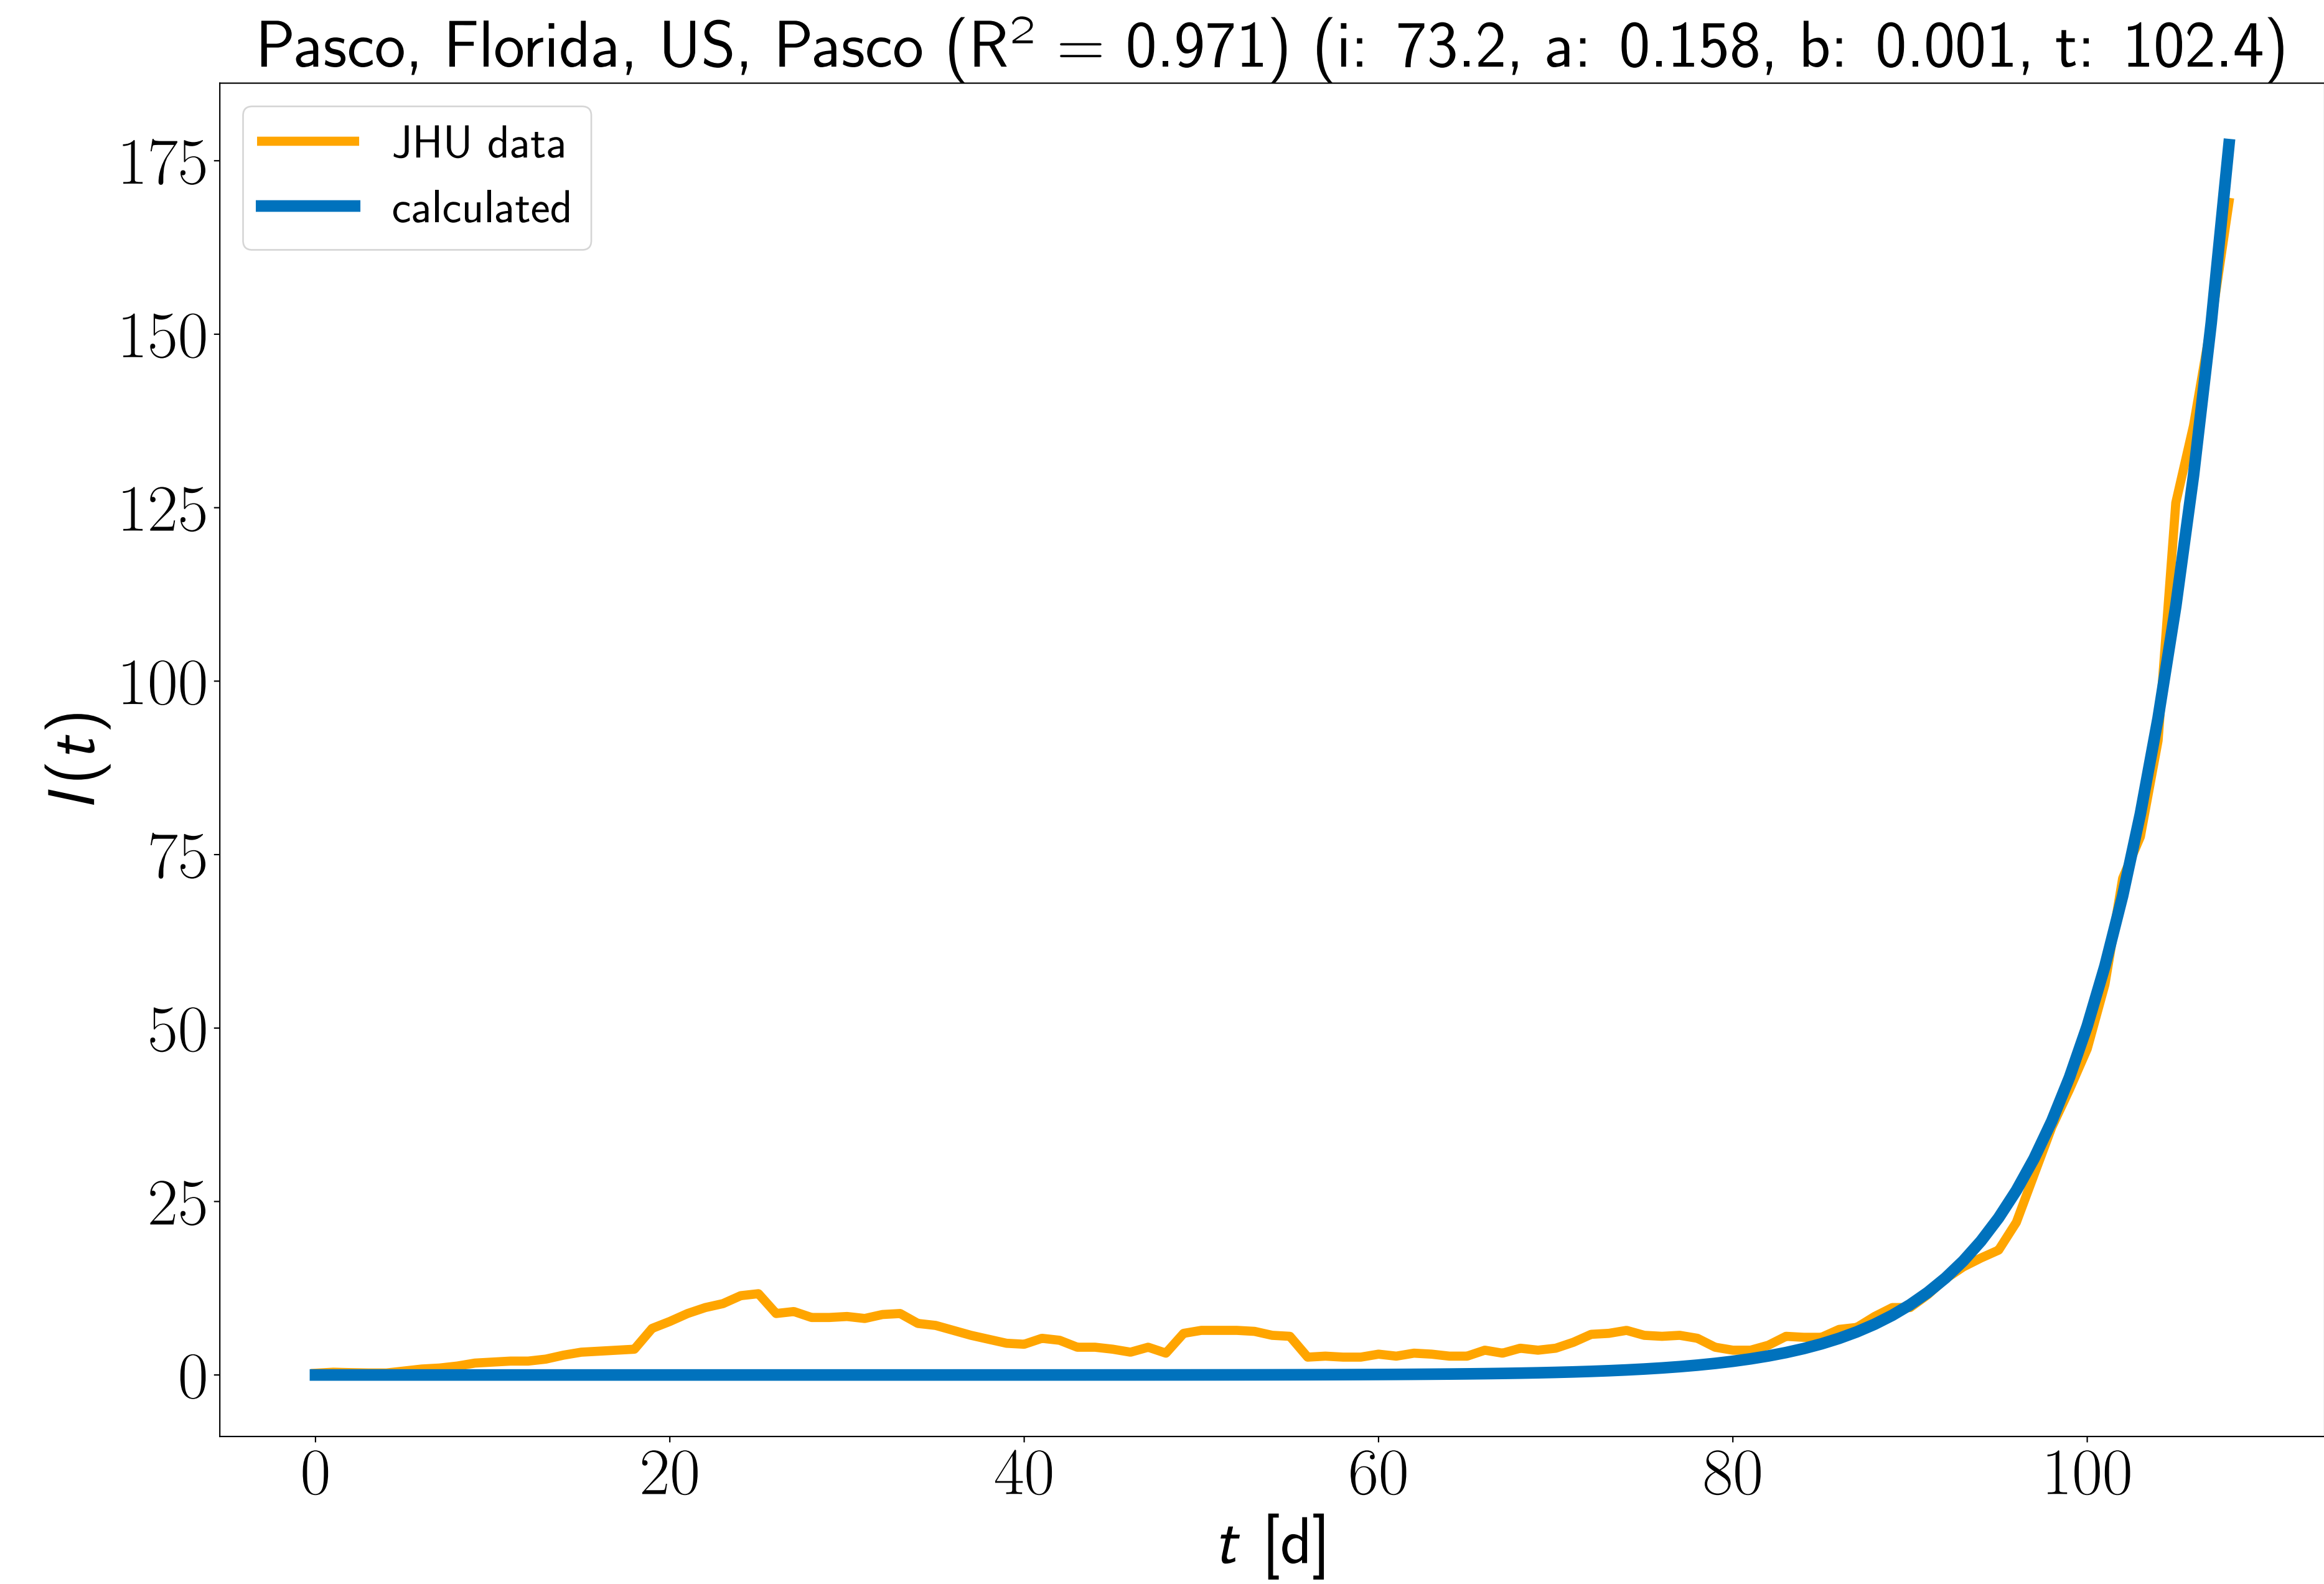

Pinellas, Florida, US, Pinellas ( $R^2 = 0.894$ ) (i: 3000.0, a: 0.102, b: 0.001, t: 125.8)

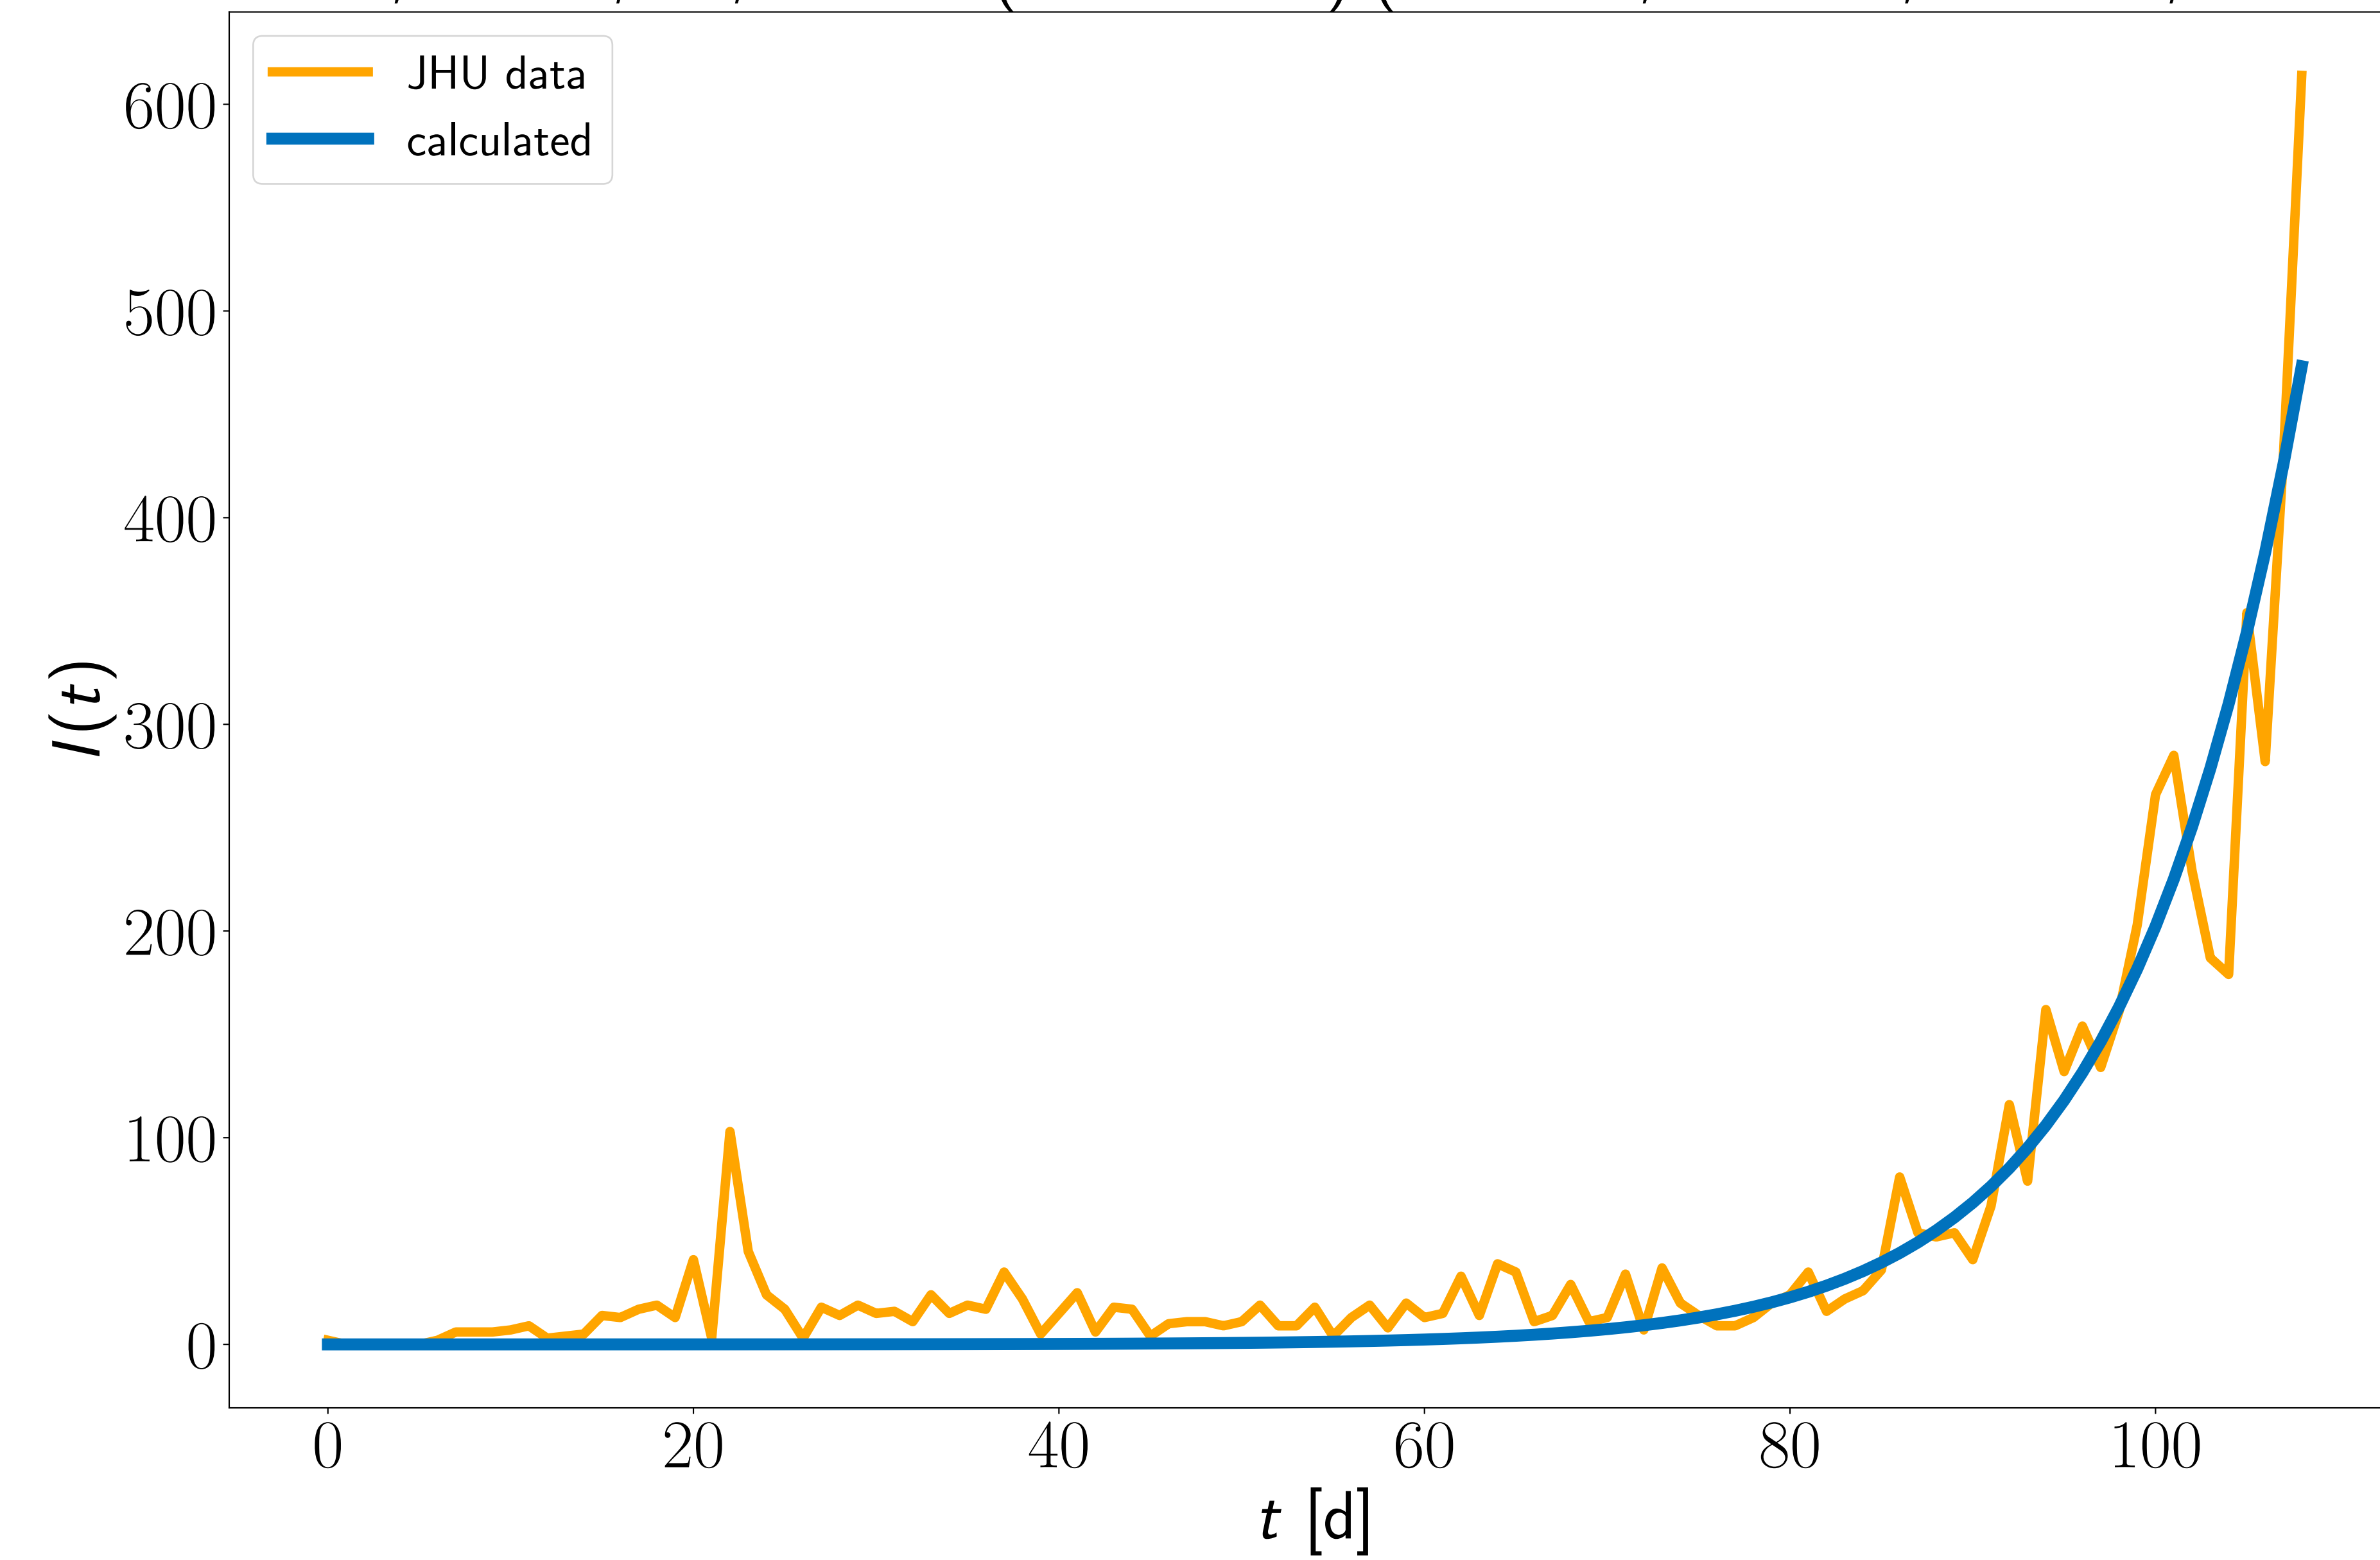

Pinellas, Florida, US, Pinellas ( $R^2 = 0.972$ ) (i: 3000.0, a: 0.085, b: 0.001, t: 130.8)

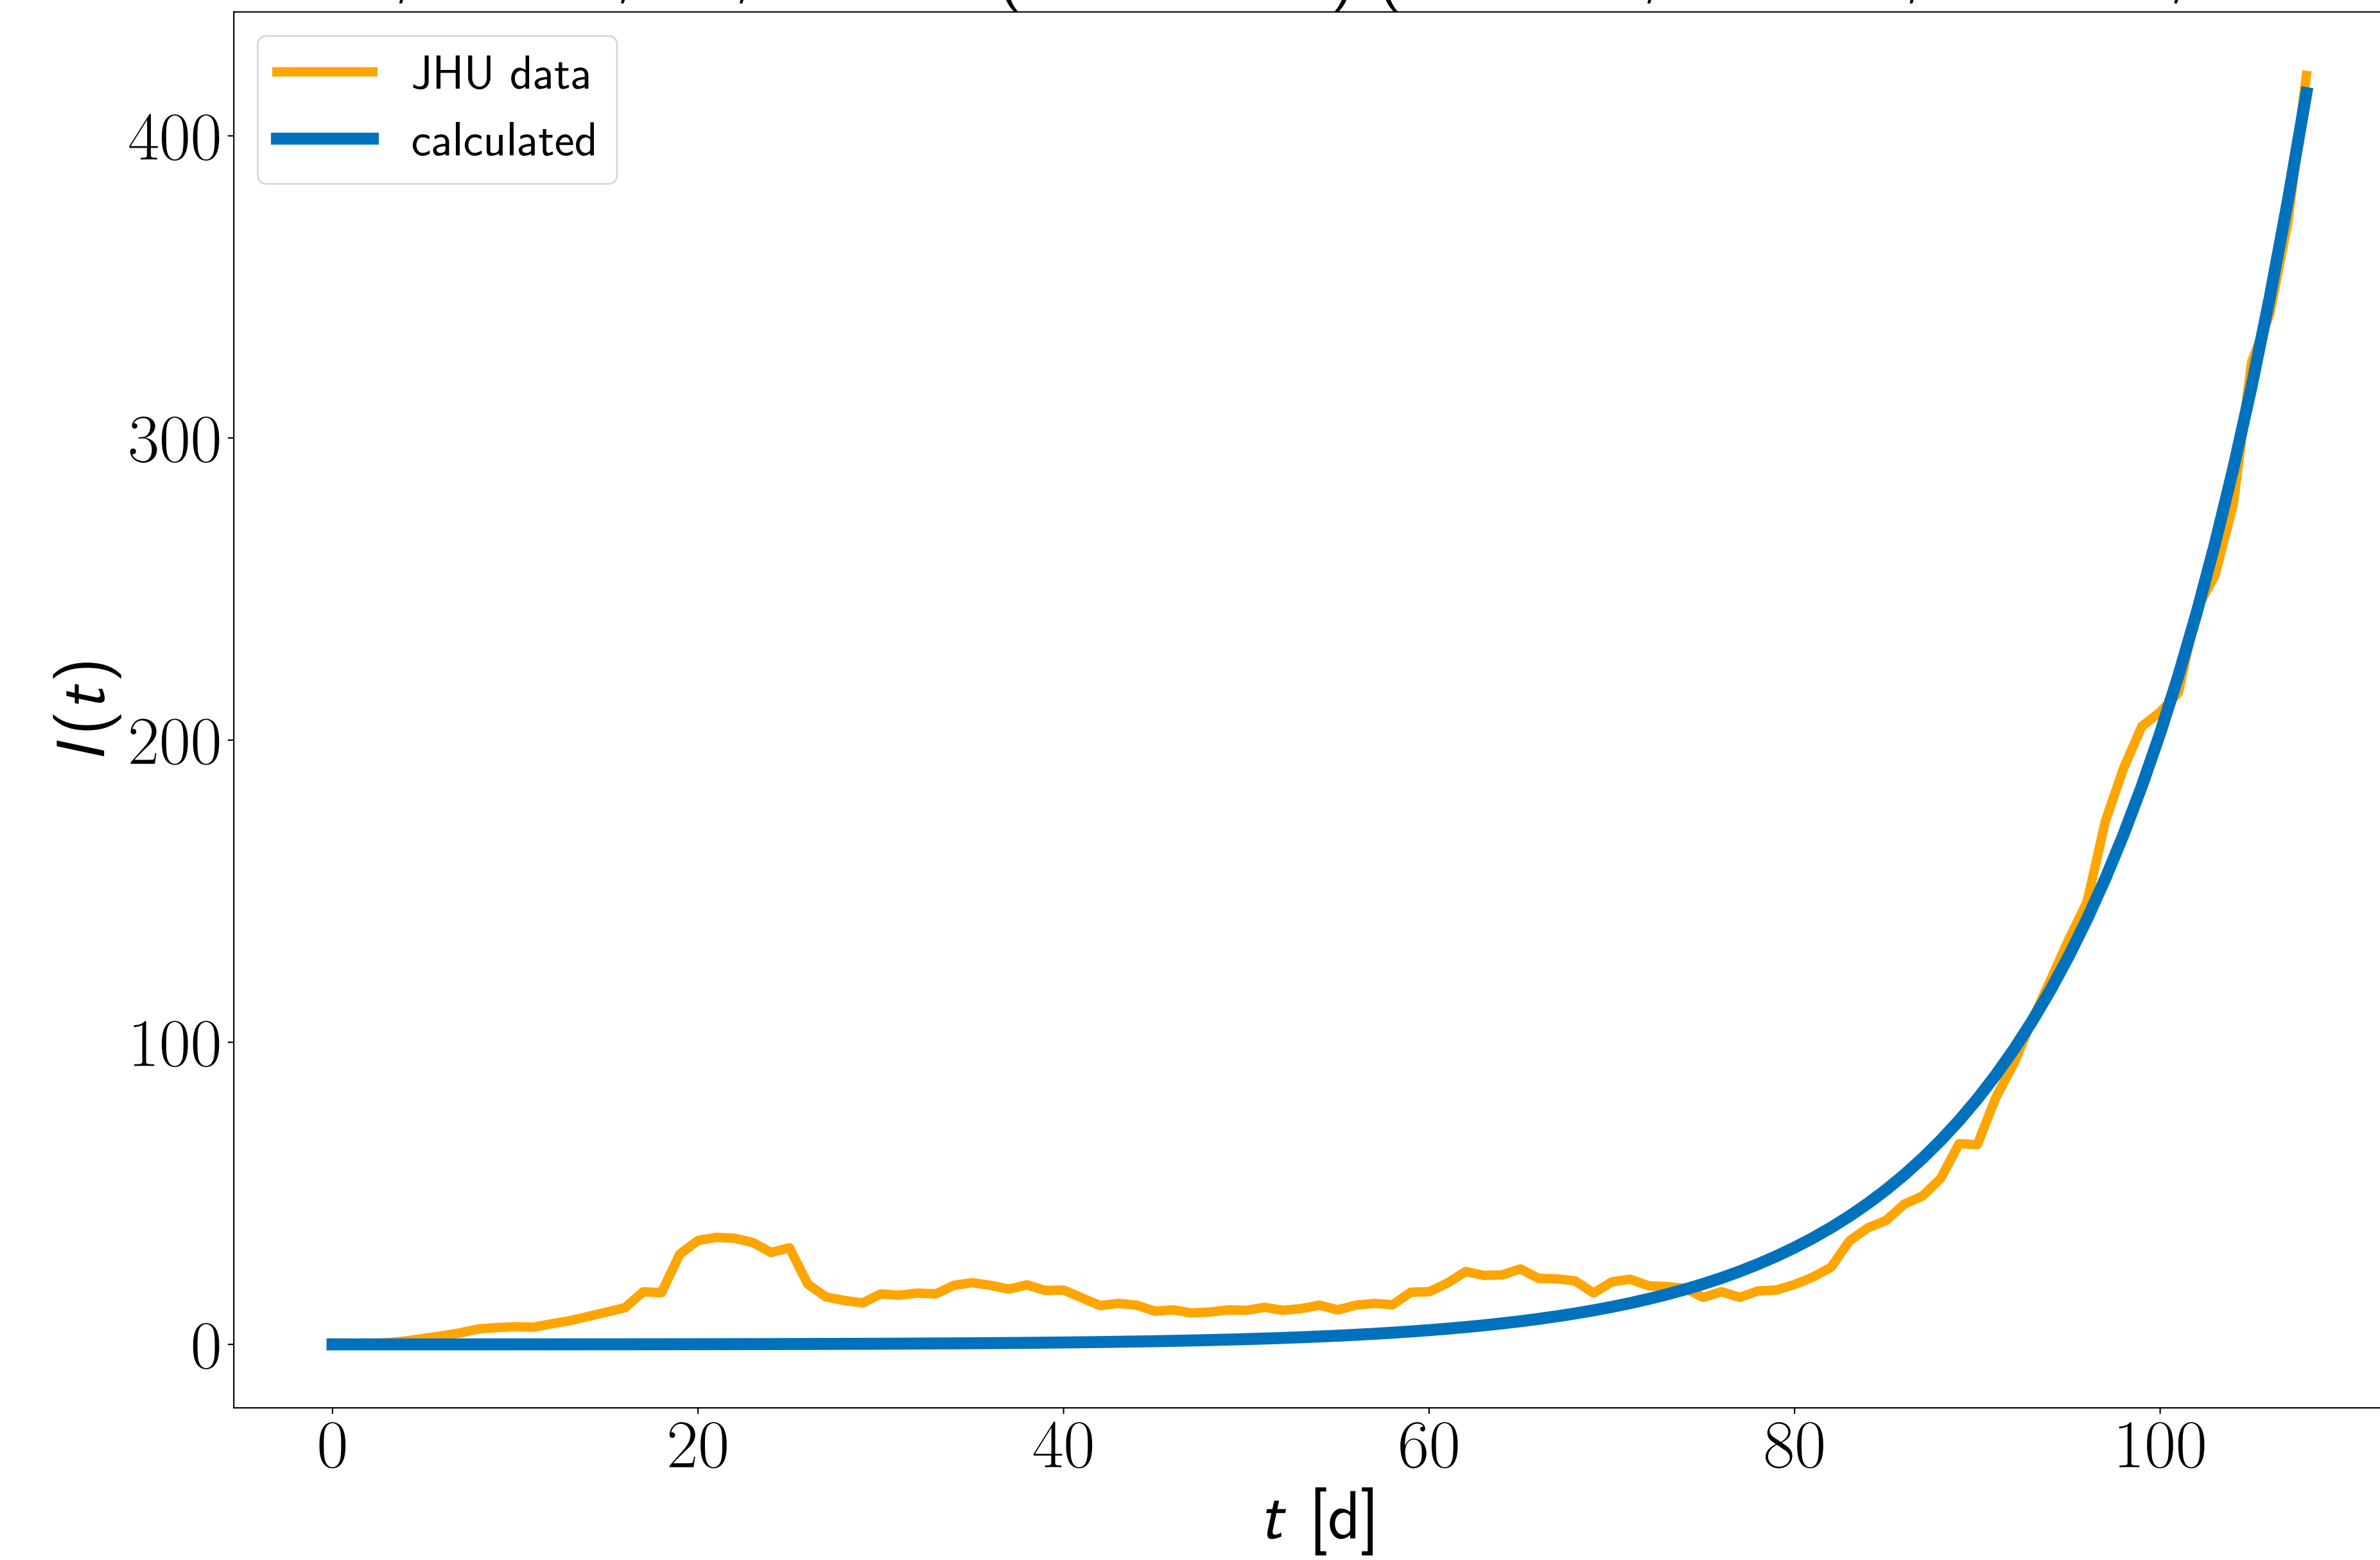

Seward, Kansas, US, Seward ( $R^2 = 0.542$ ) (i: 5.8, a: 0.889, b: 0.15, t: 10.3)

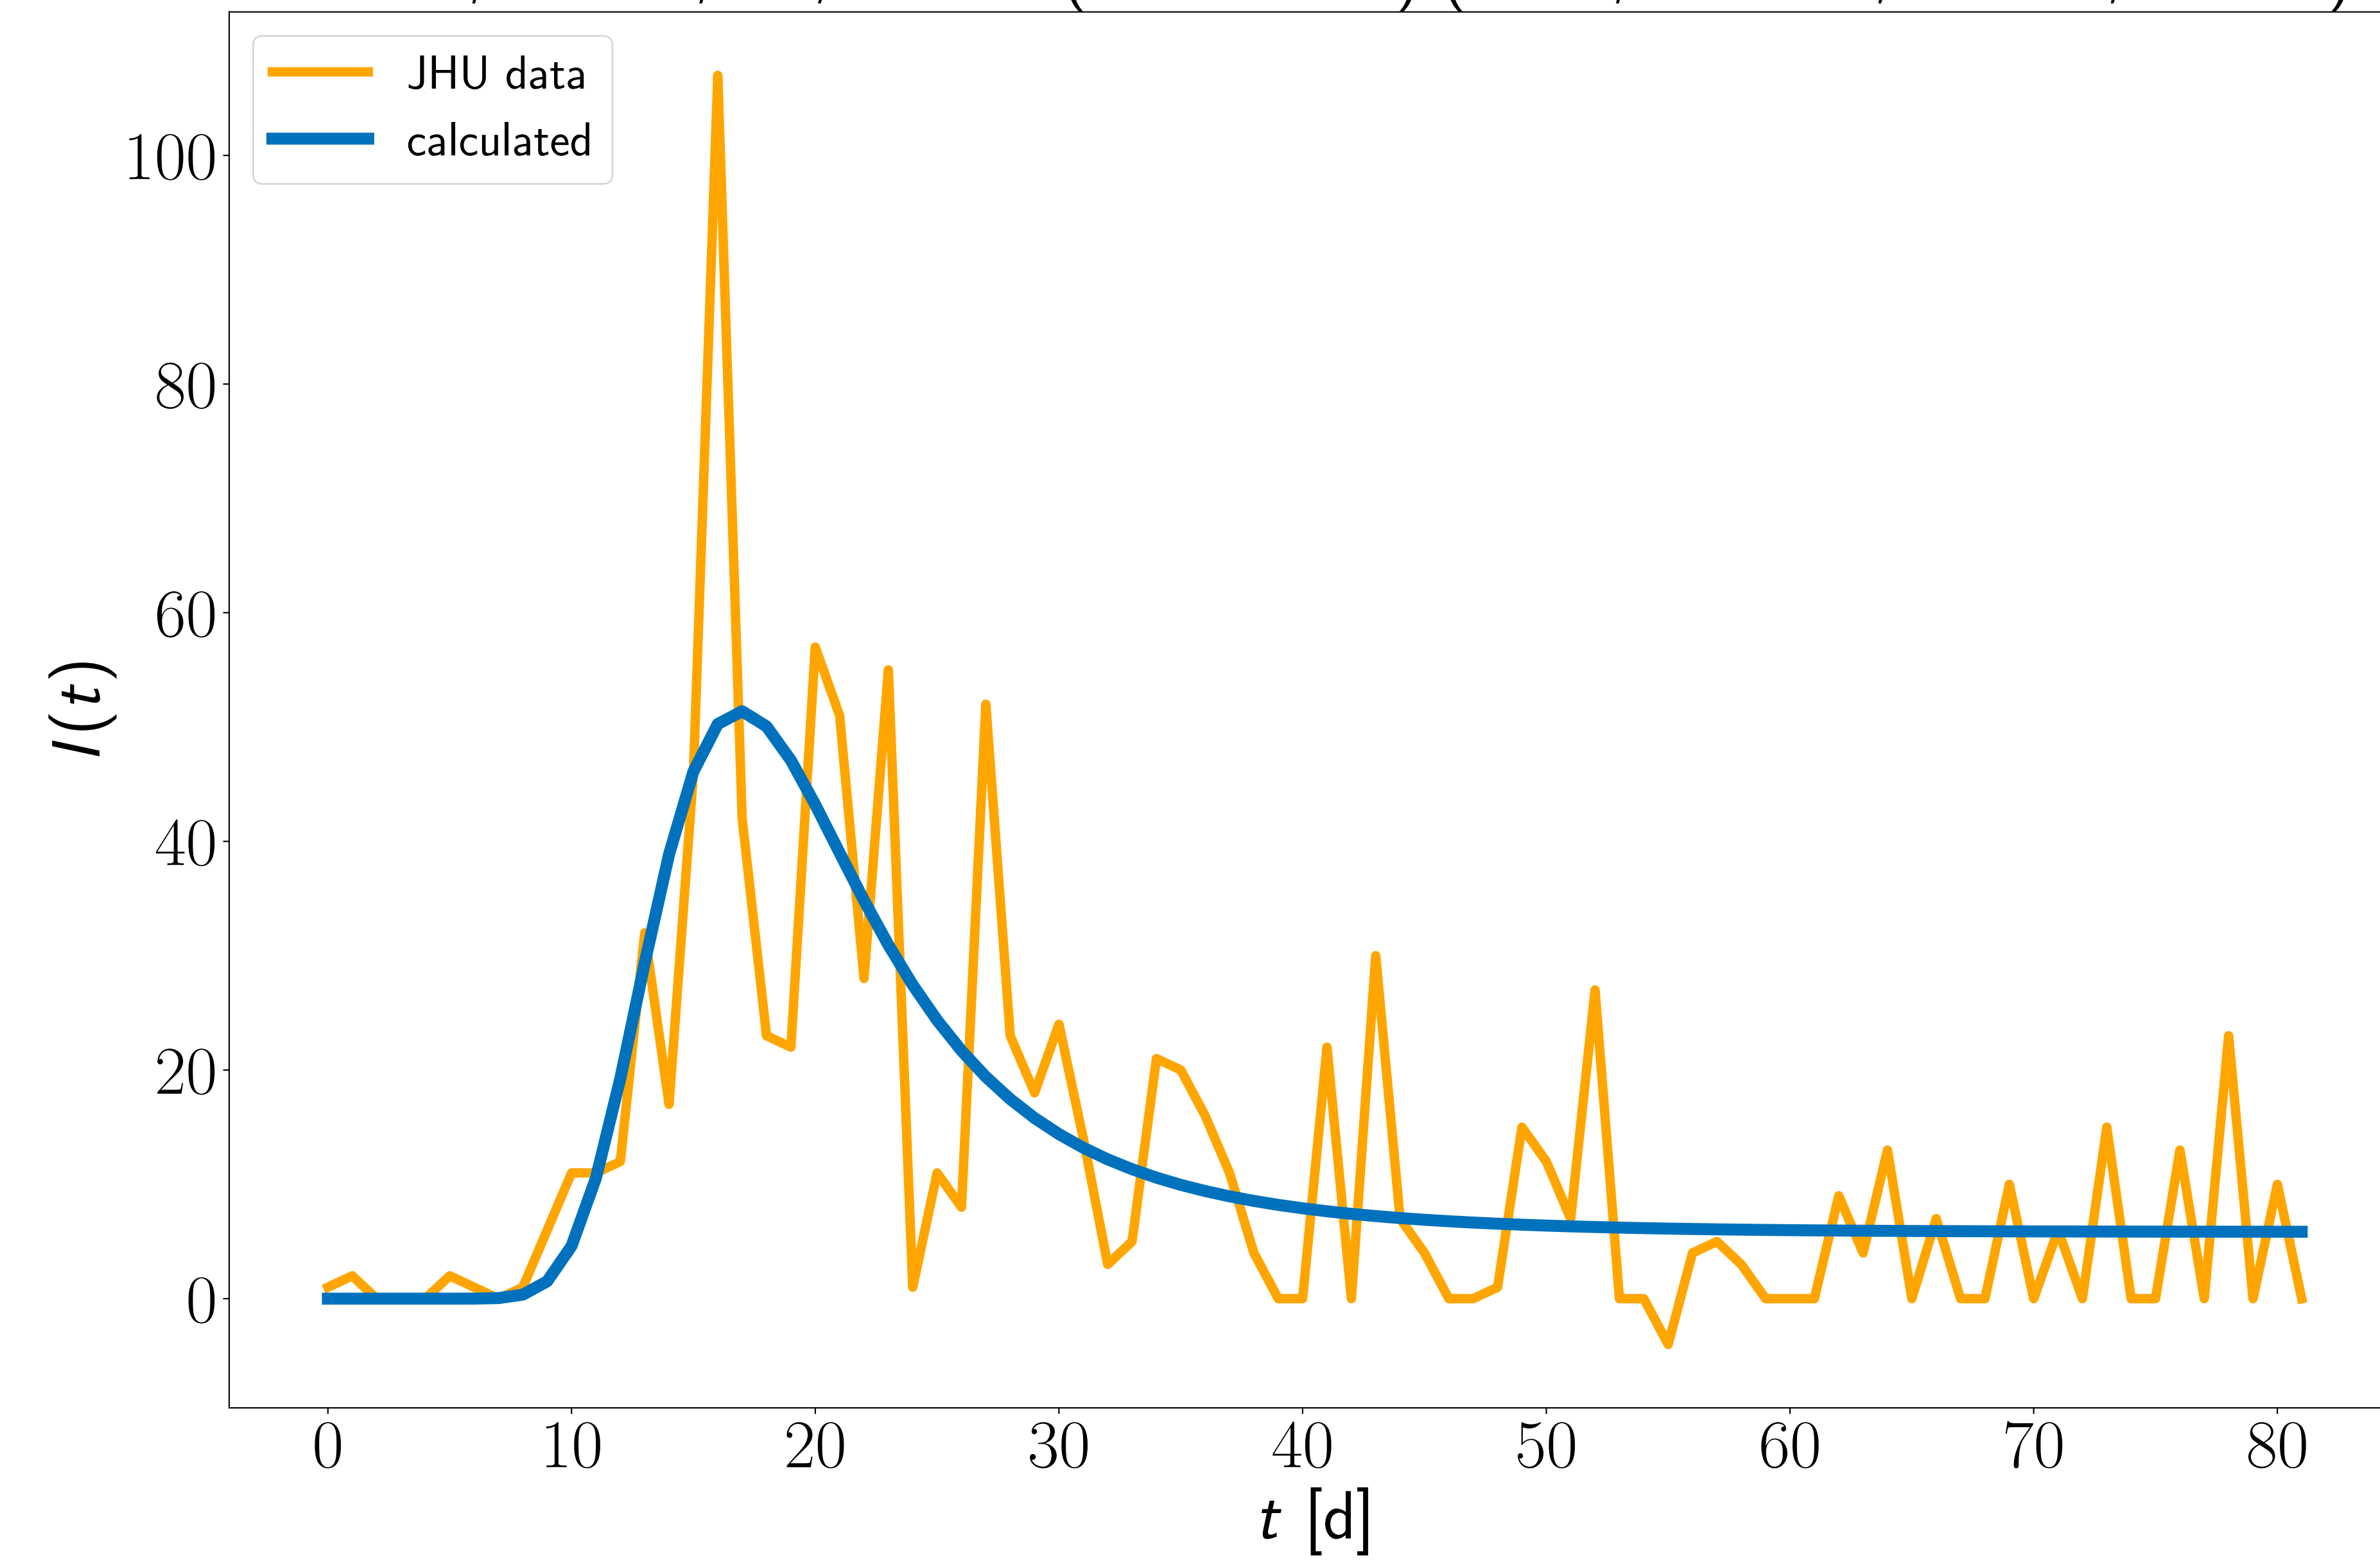

Seward, Kansas, US, Seward ( $R^2 = 0.974$ ) (i: 5.1, a: 0.717, b: 0.121, t: 9.0)

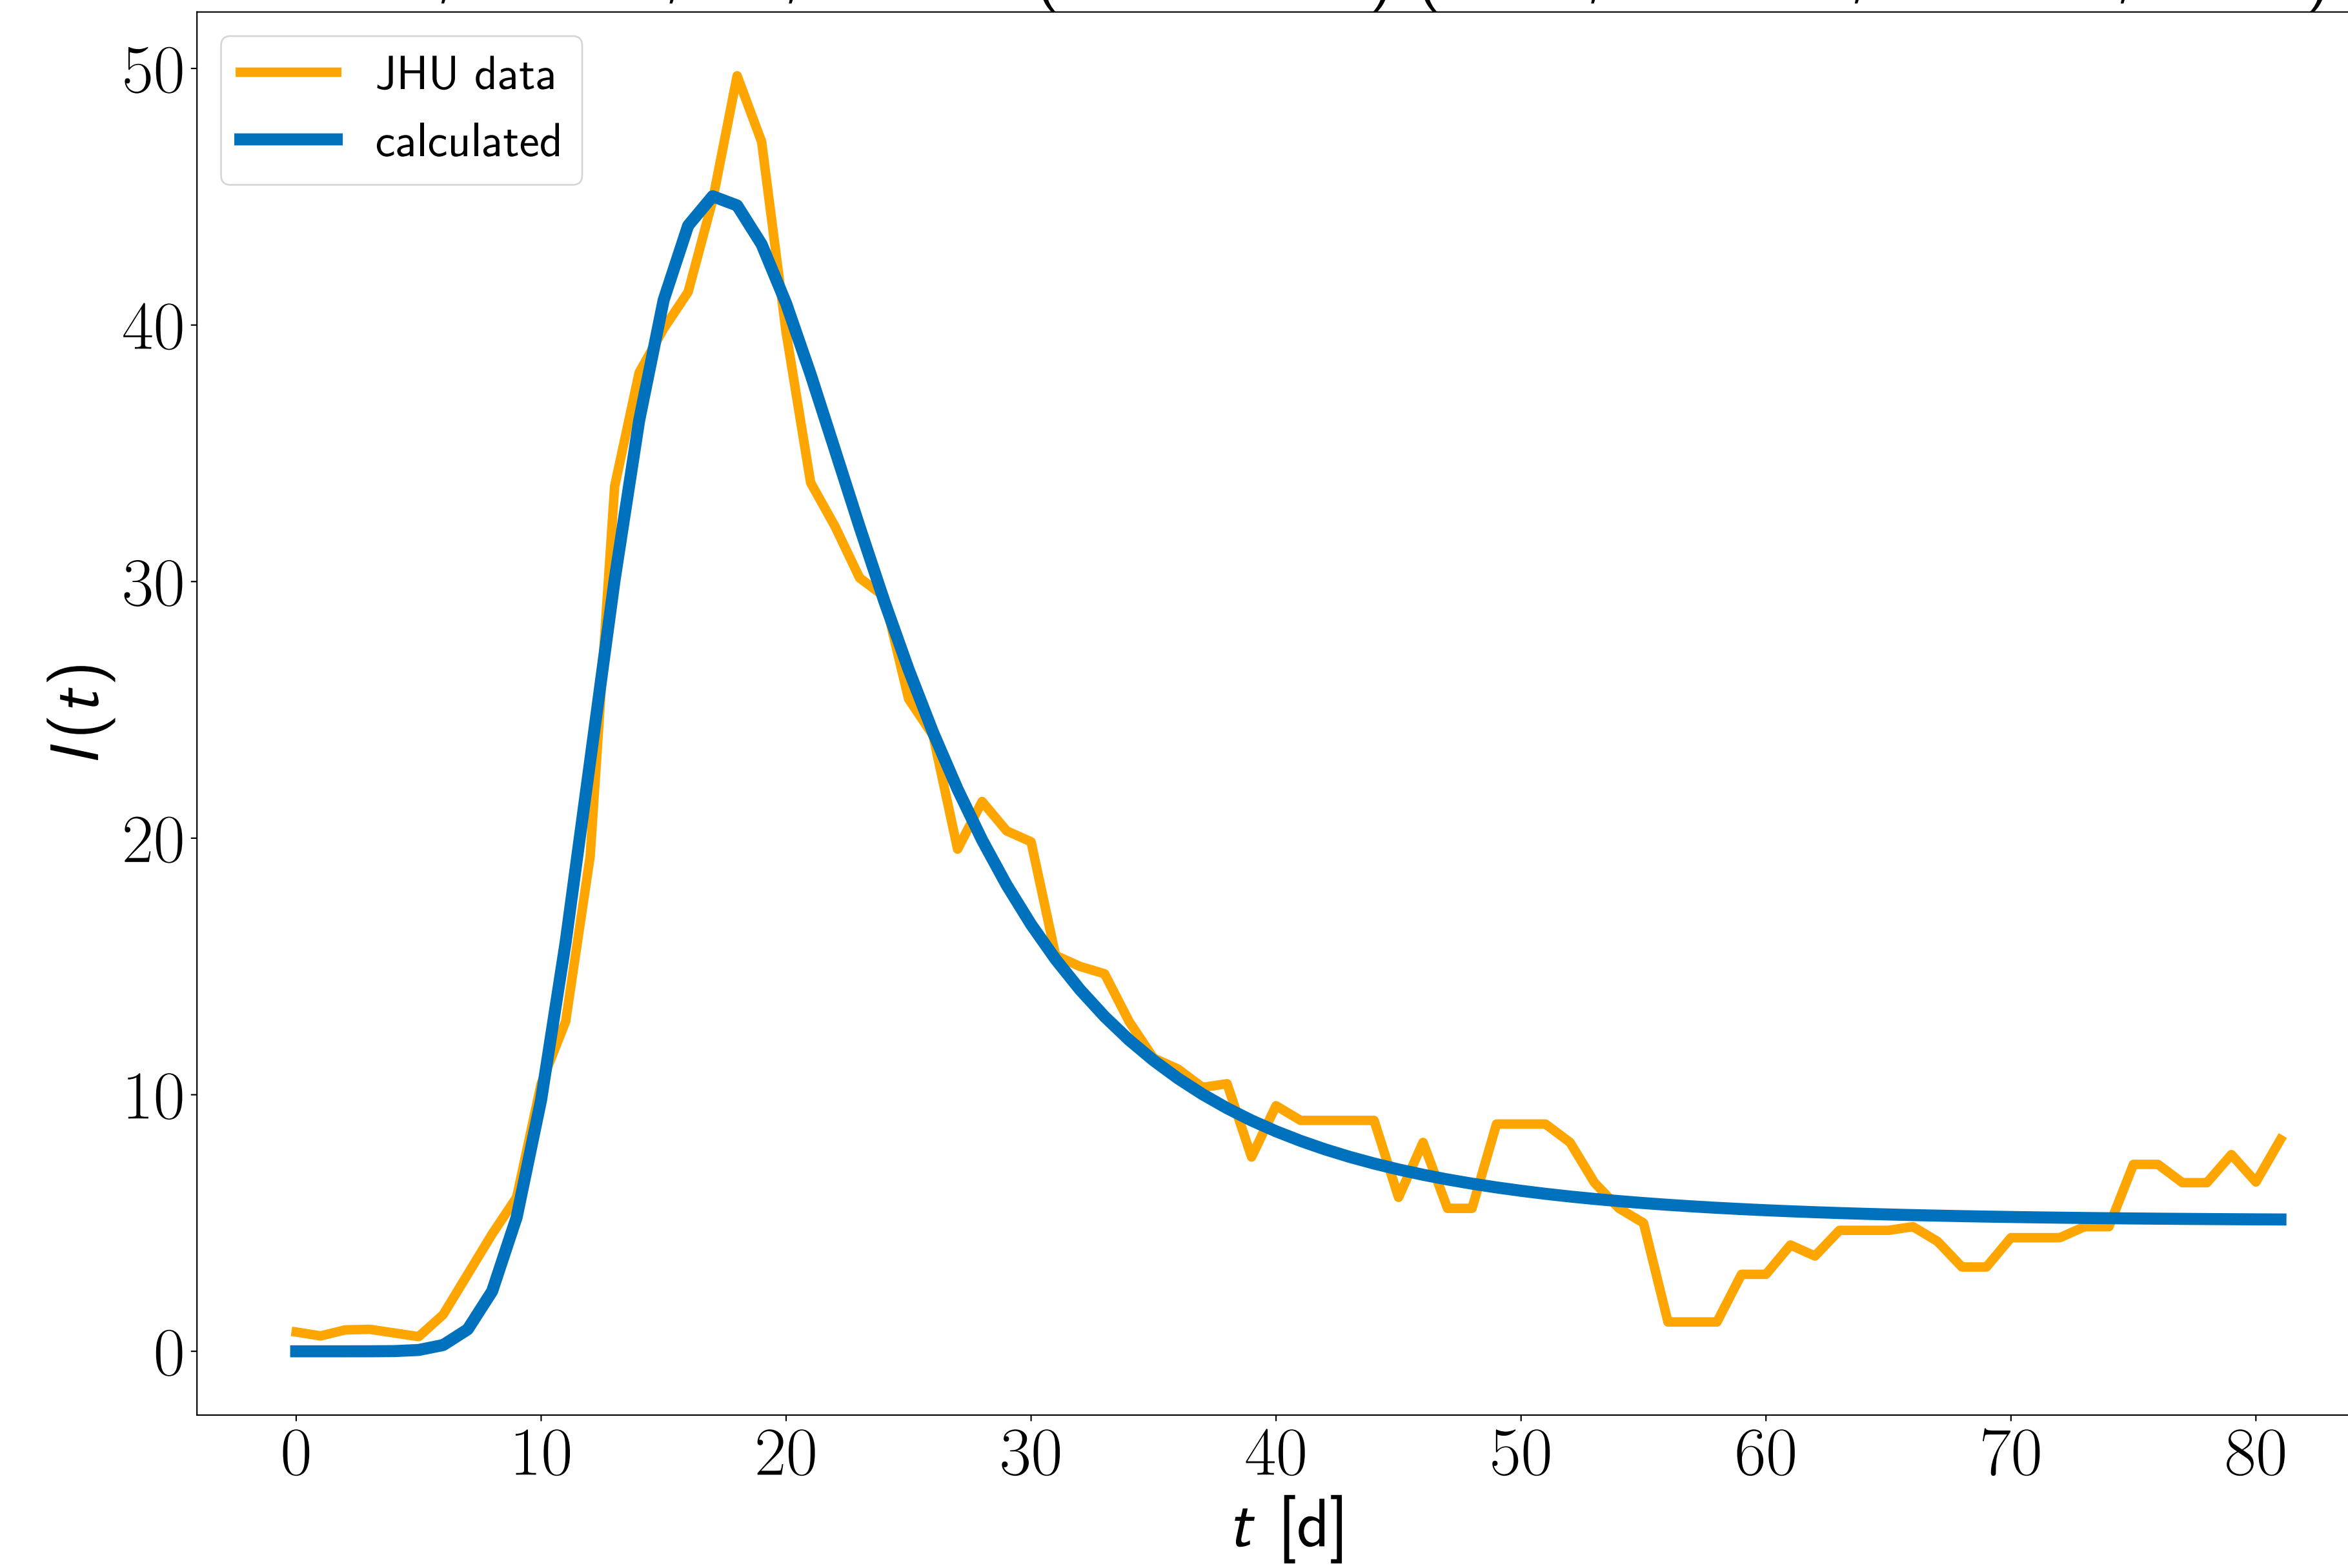

Essex, Massachusetts, US, Essex ( $R^2 = 0.785$ ) (i: 1.8, a: 0.343, b: 0.024, t: 1.0)

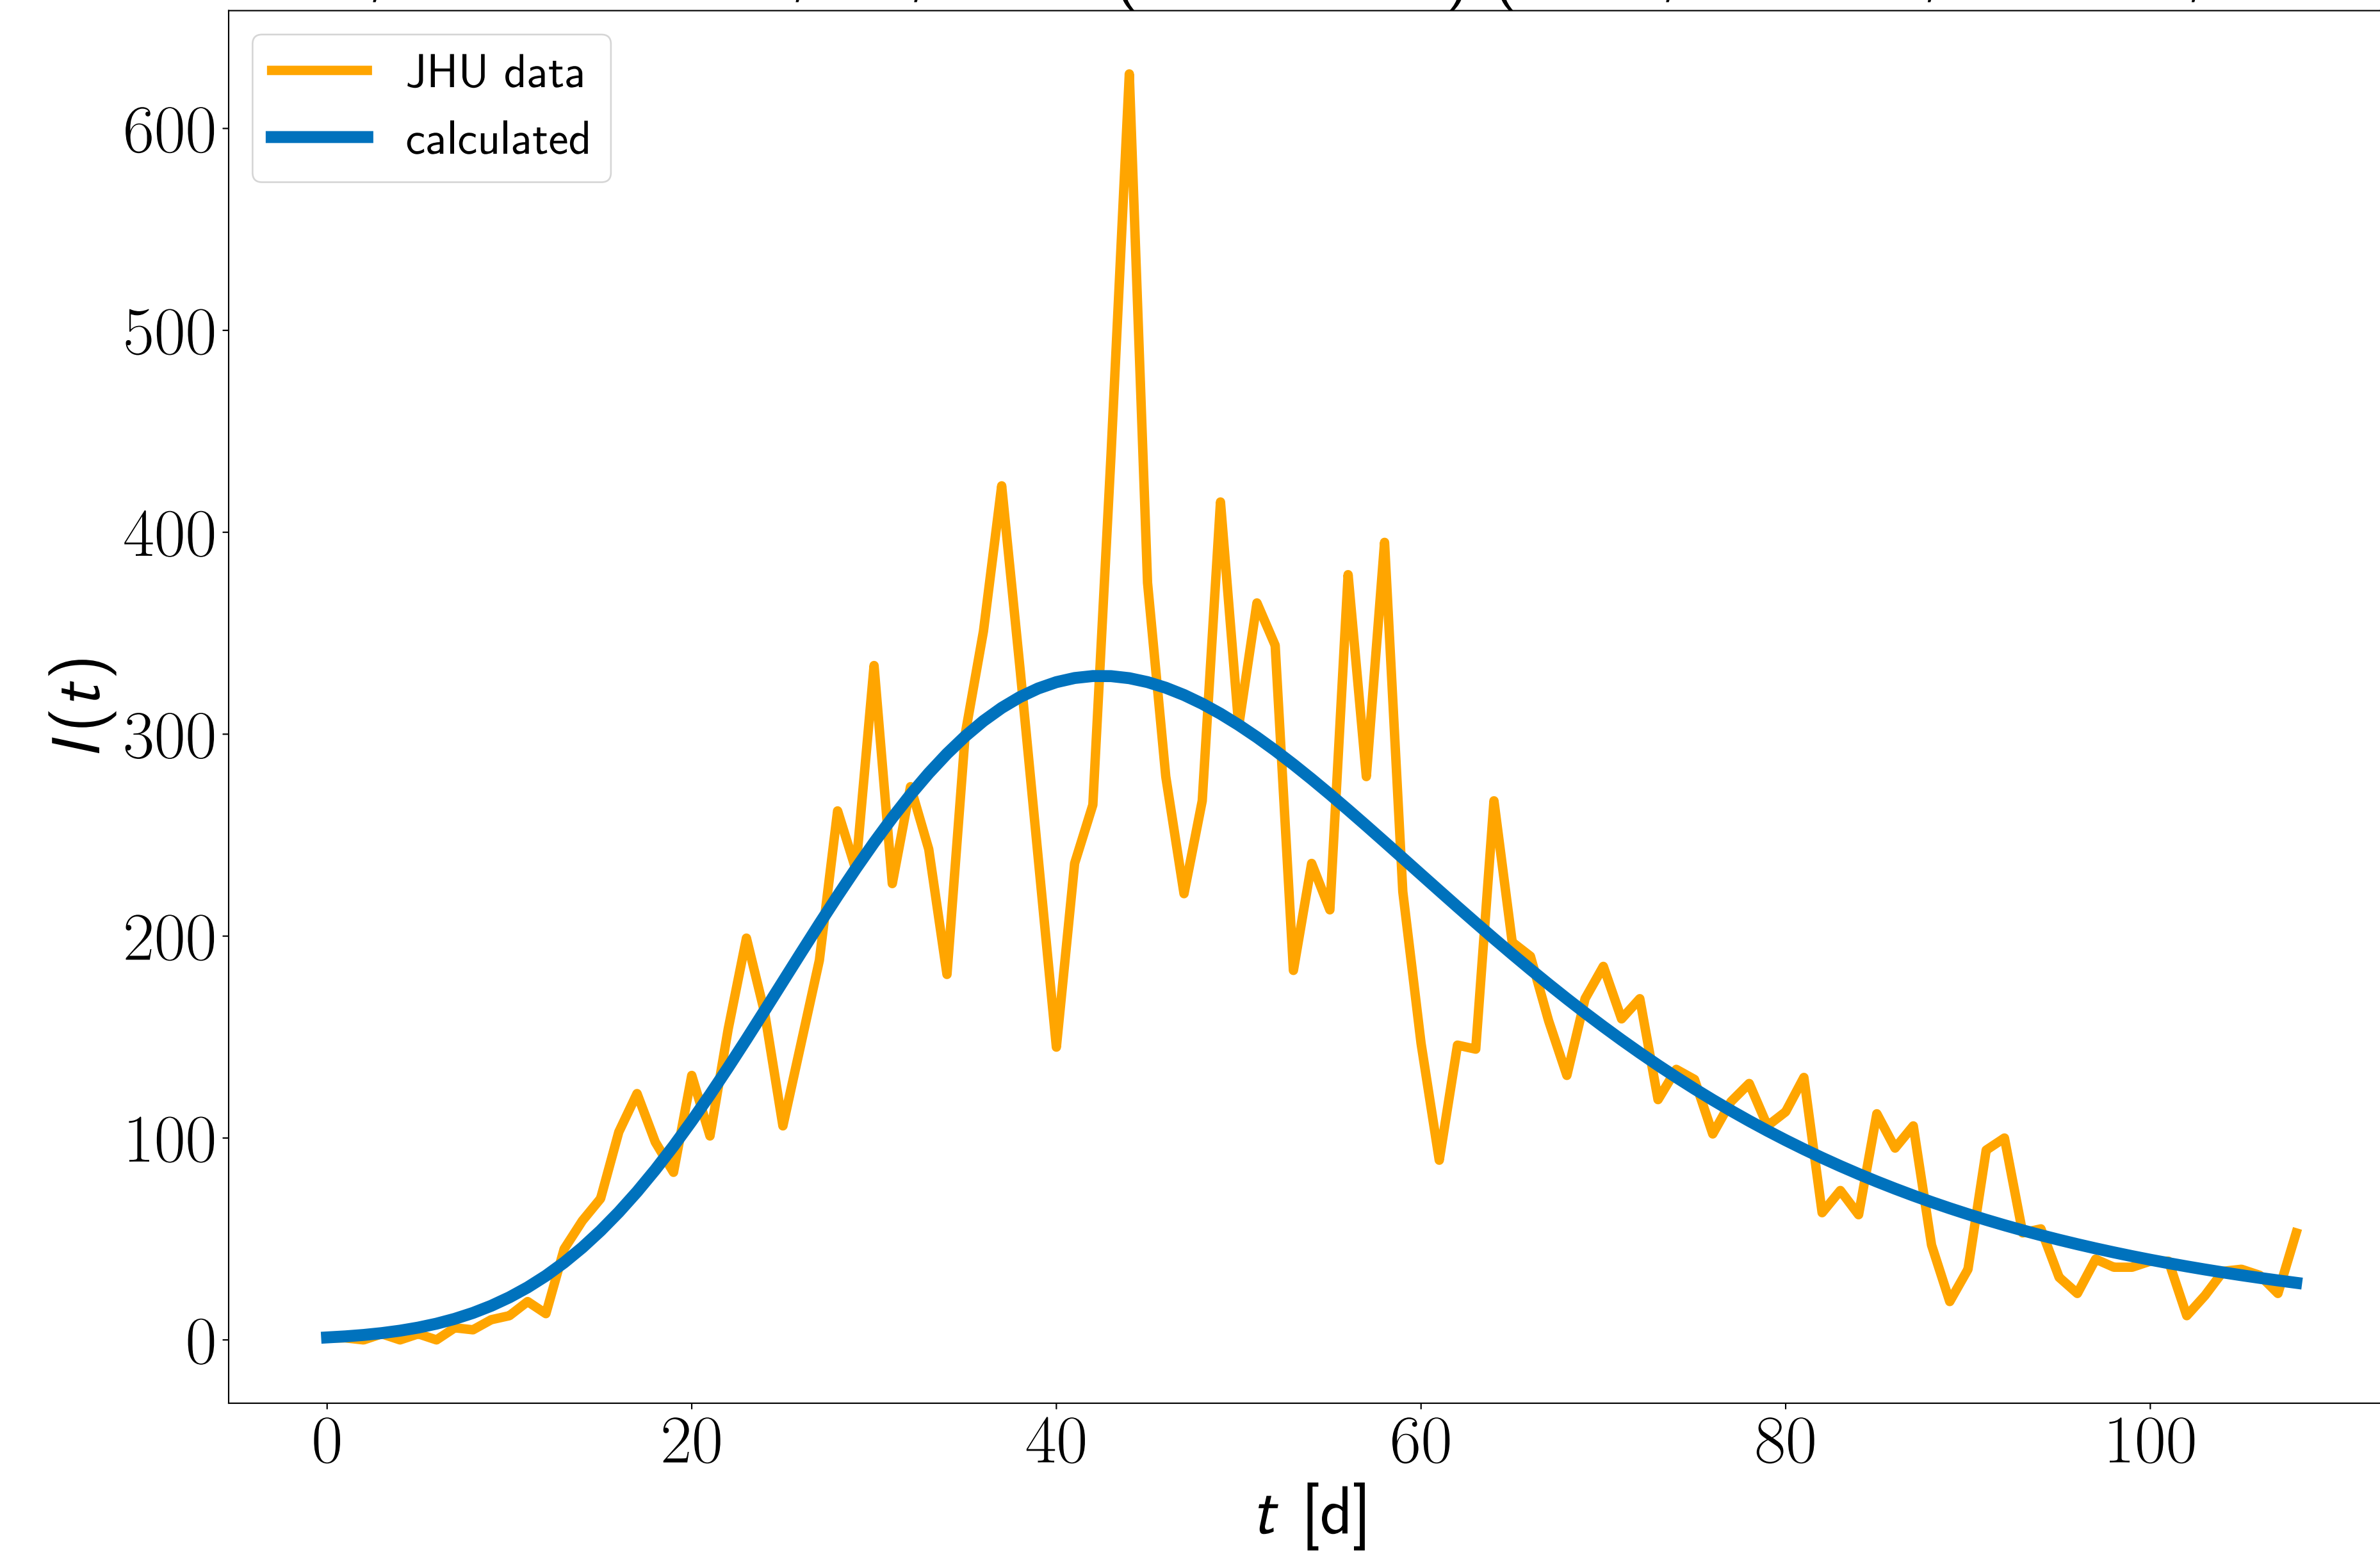

Essex, Massachusetts, US, Essex ( $R^2 = 0.984$ ) (i: 1.8, a: 0.34, b: 0.024, t: 1.0)

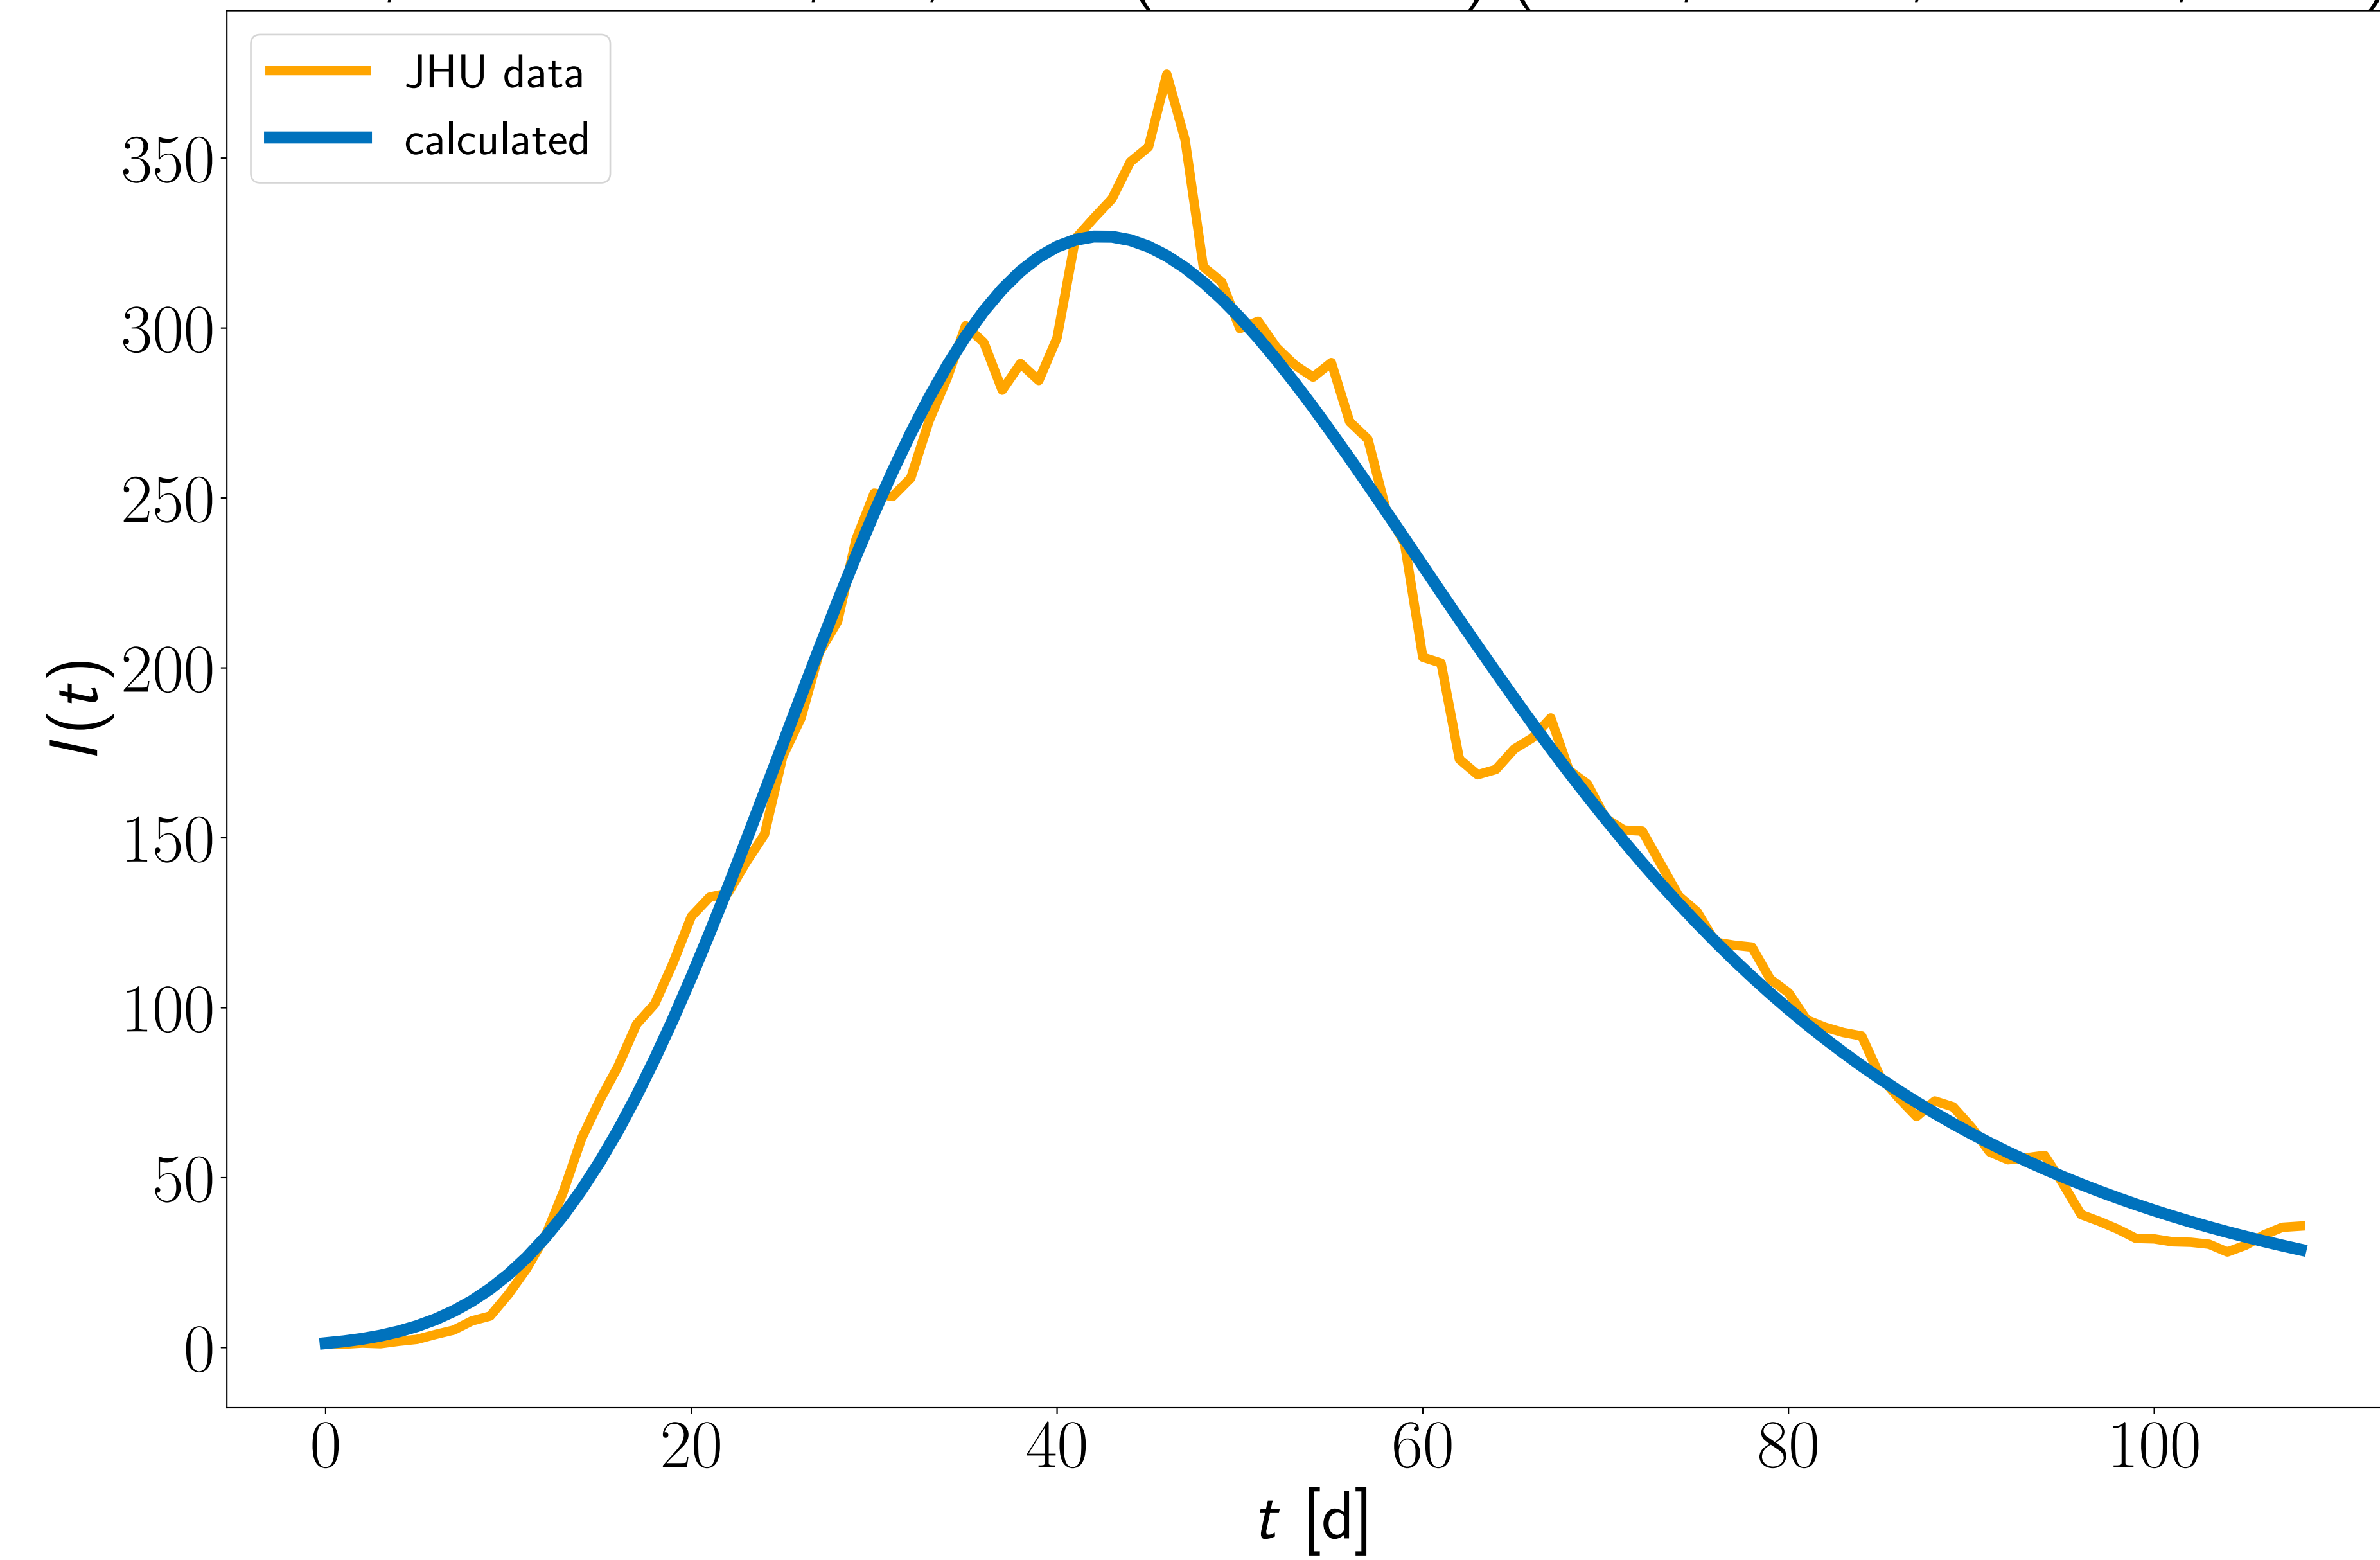

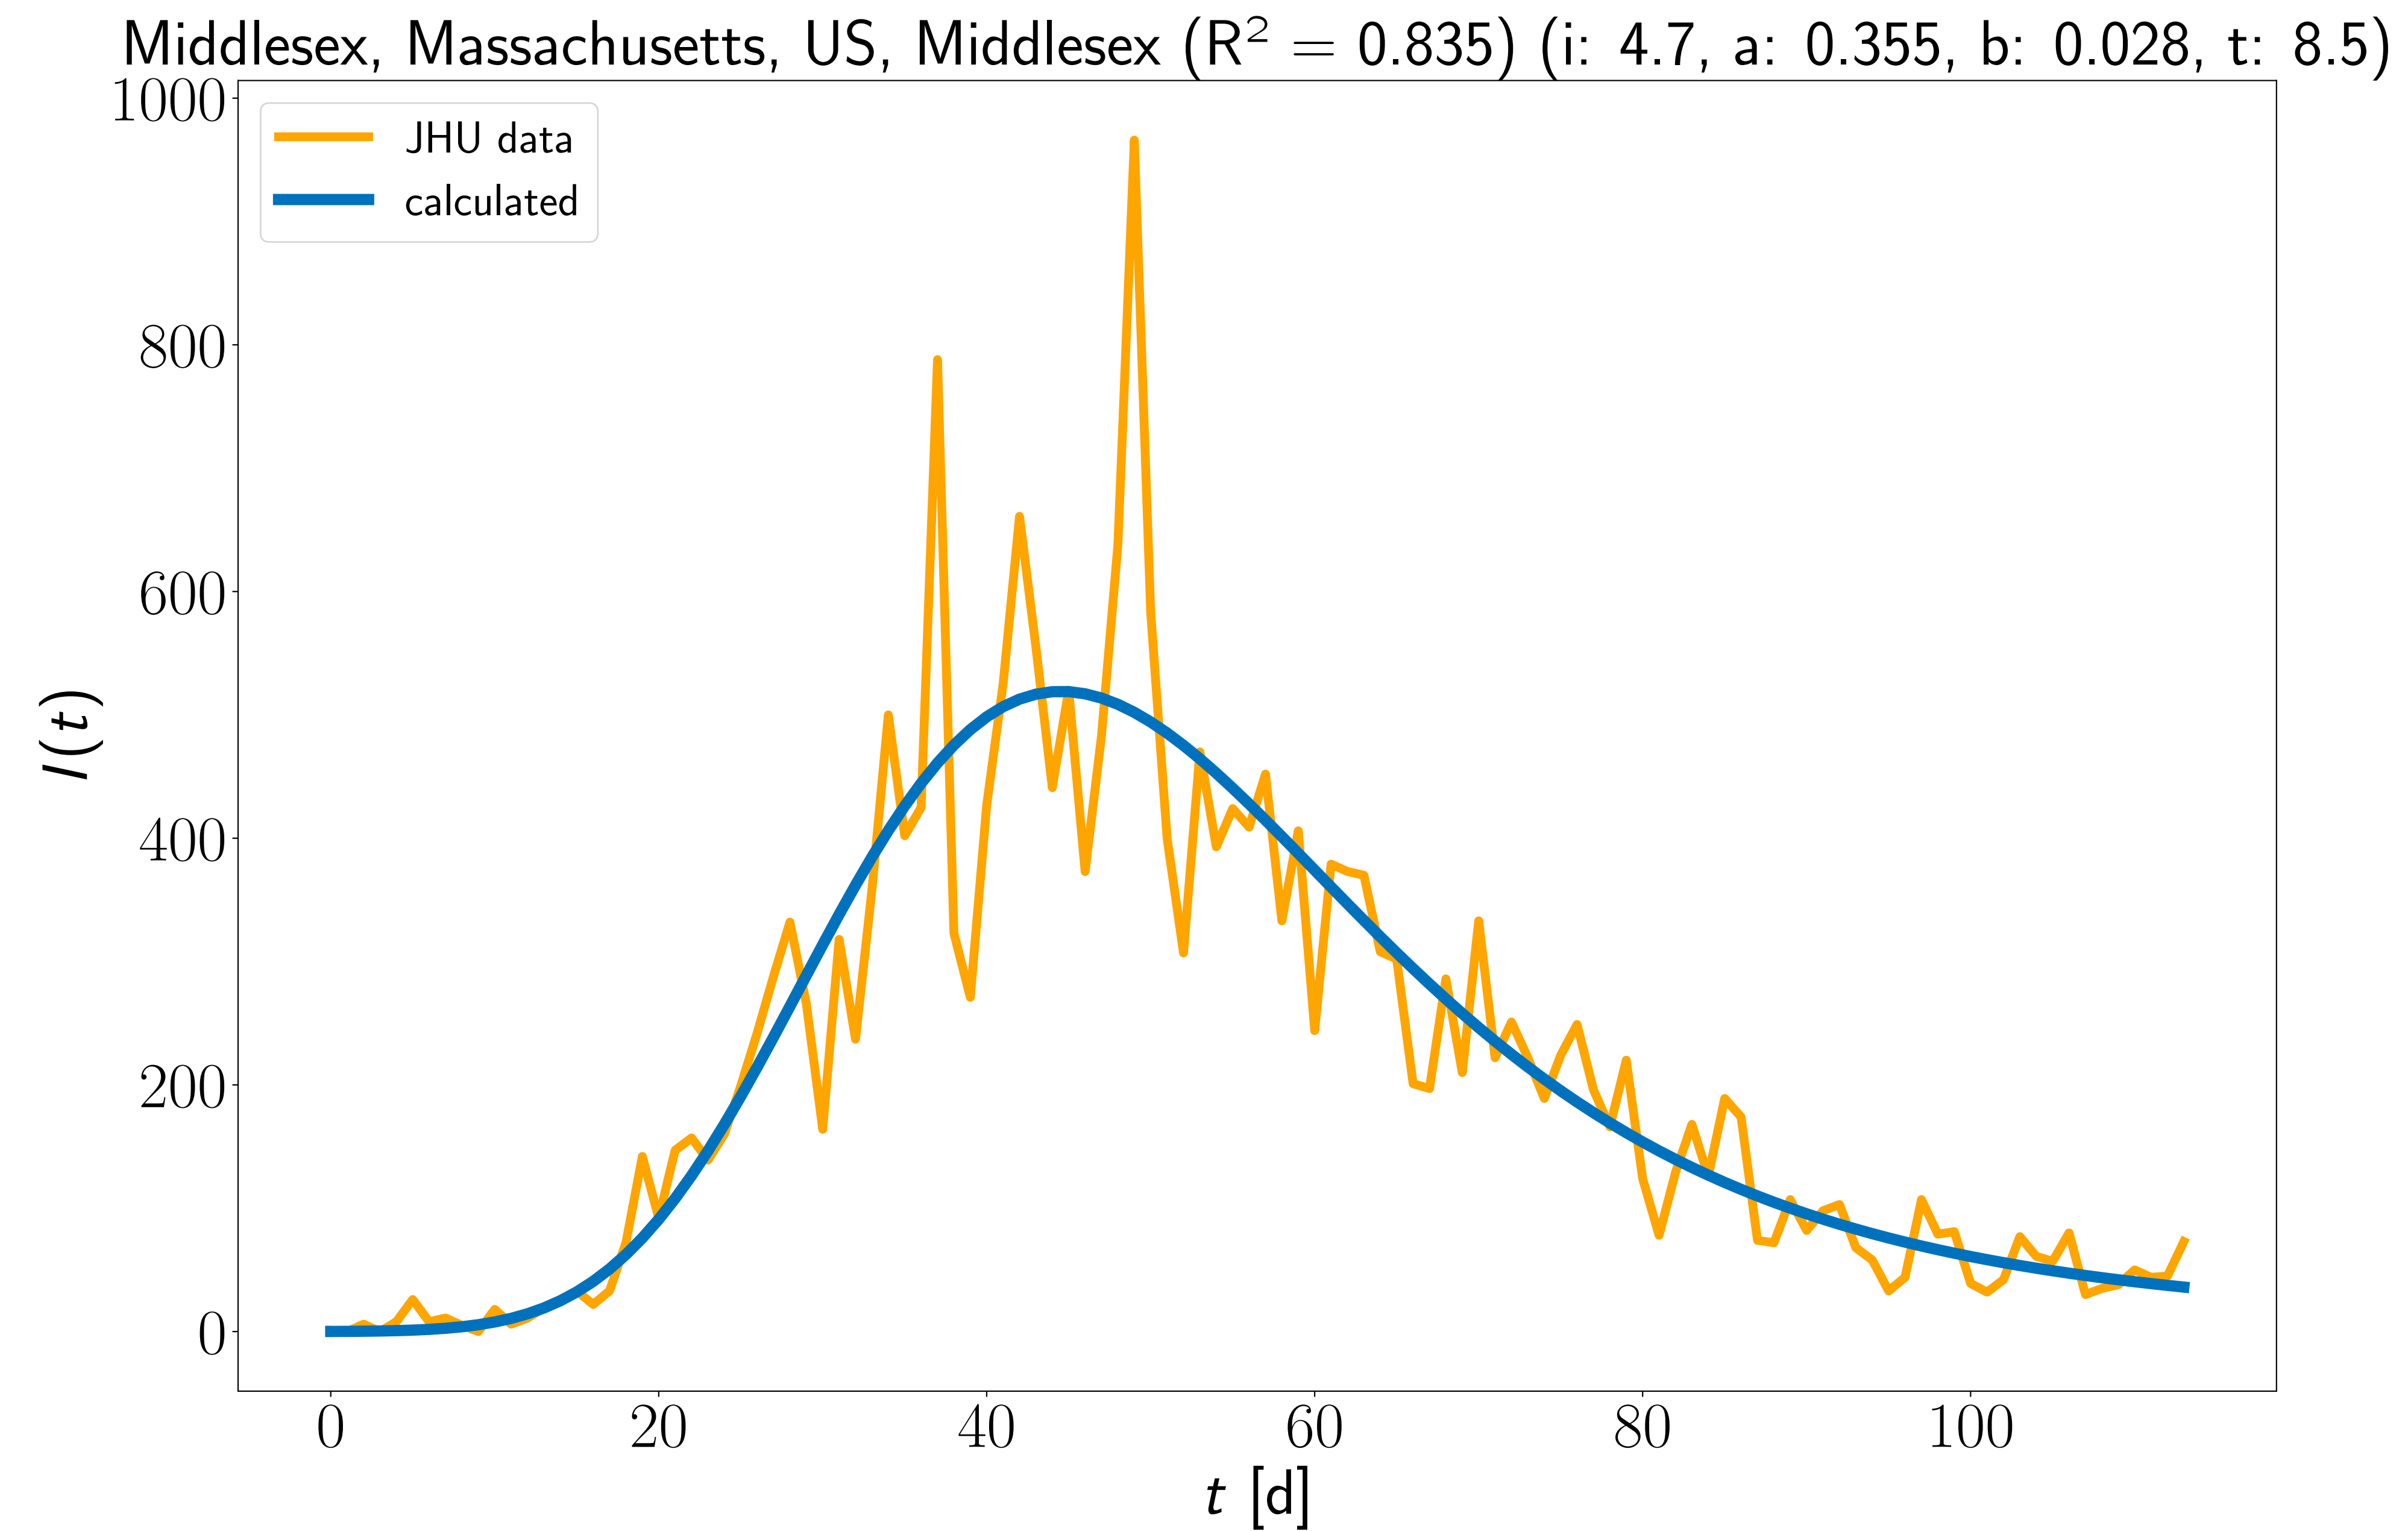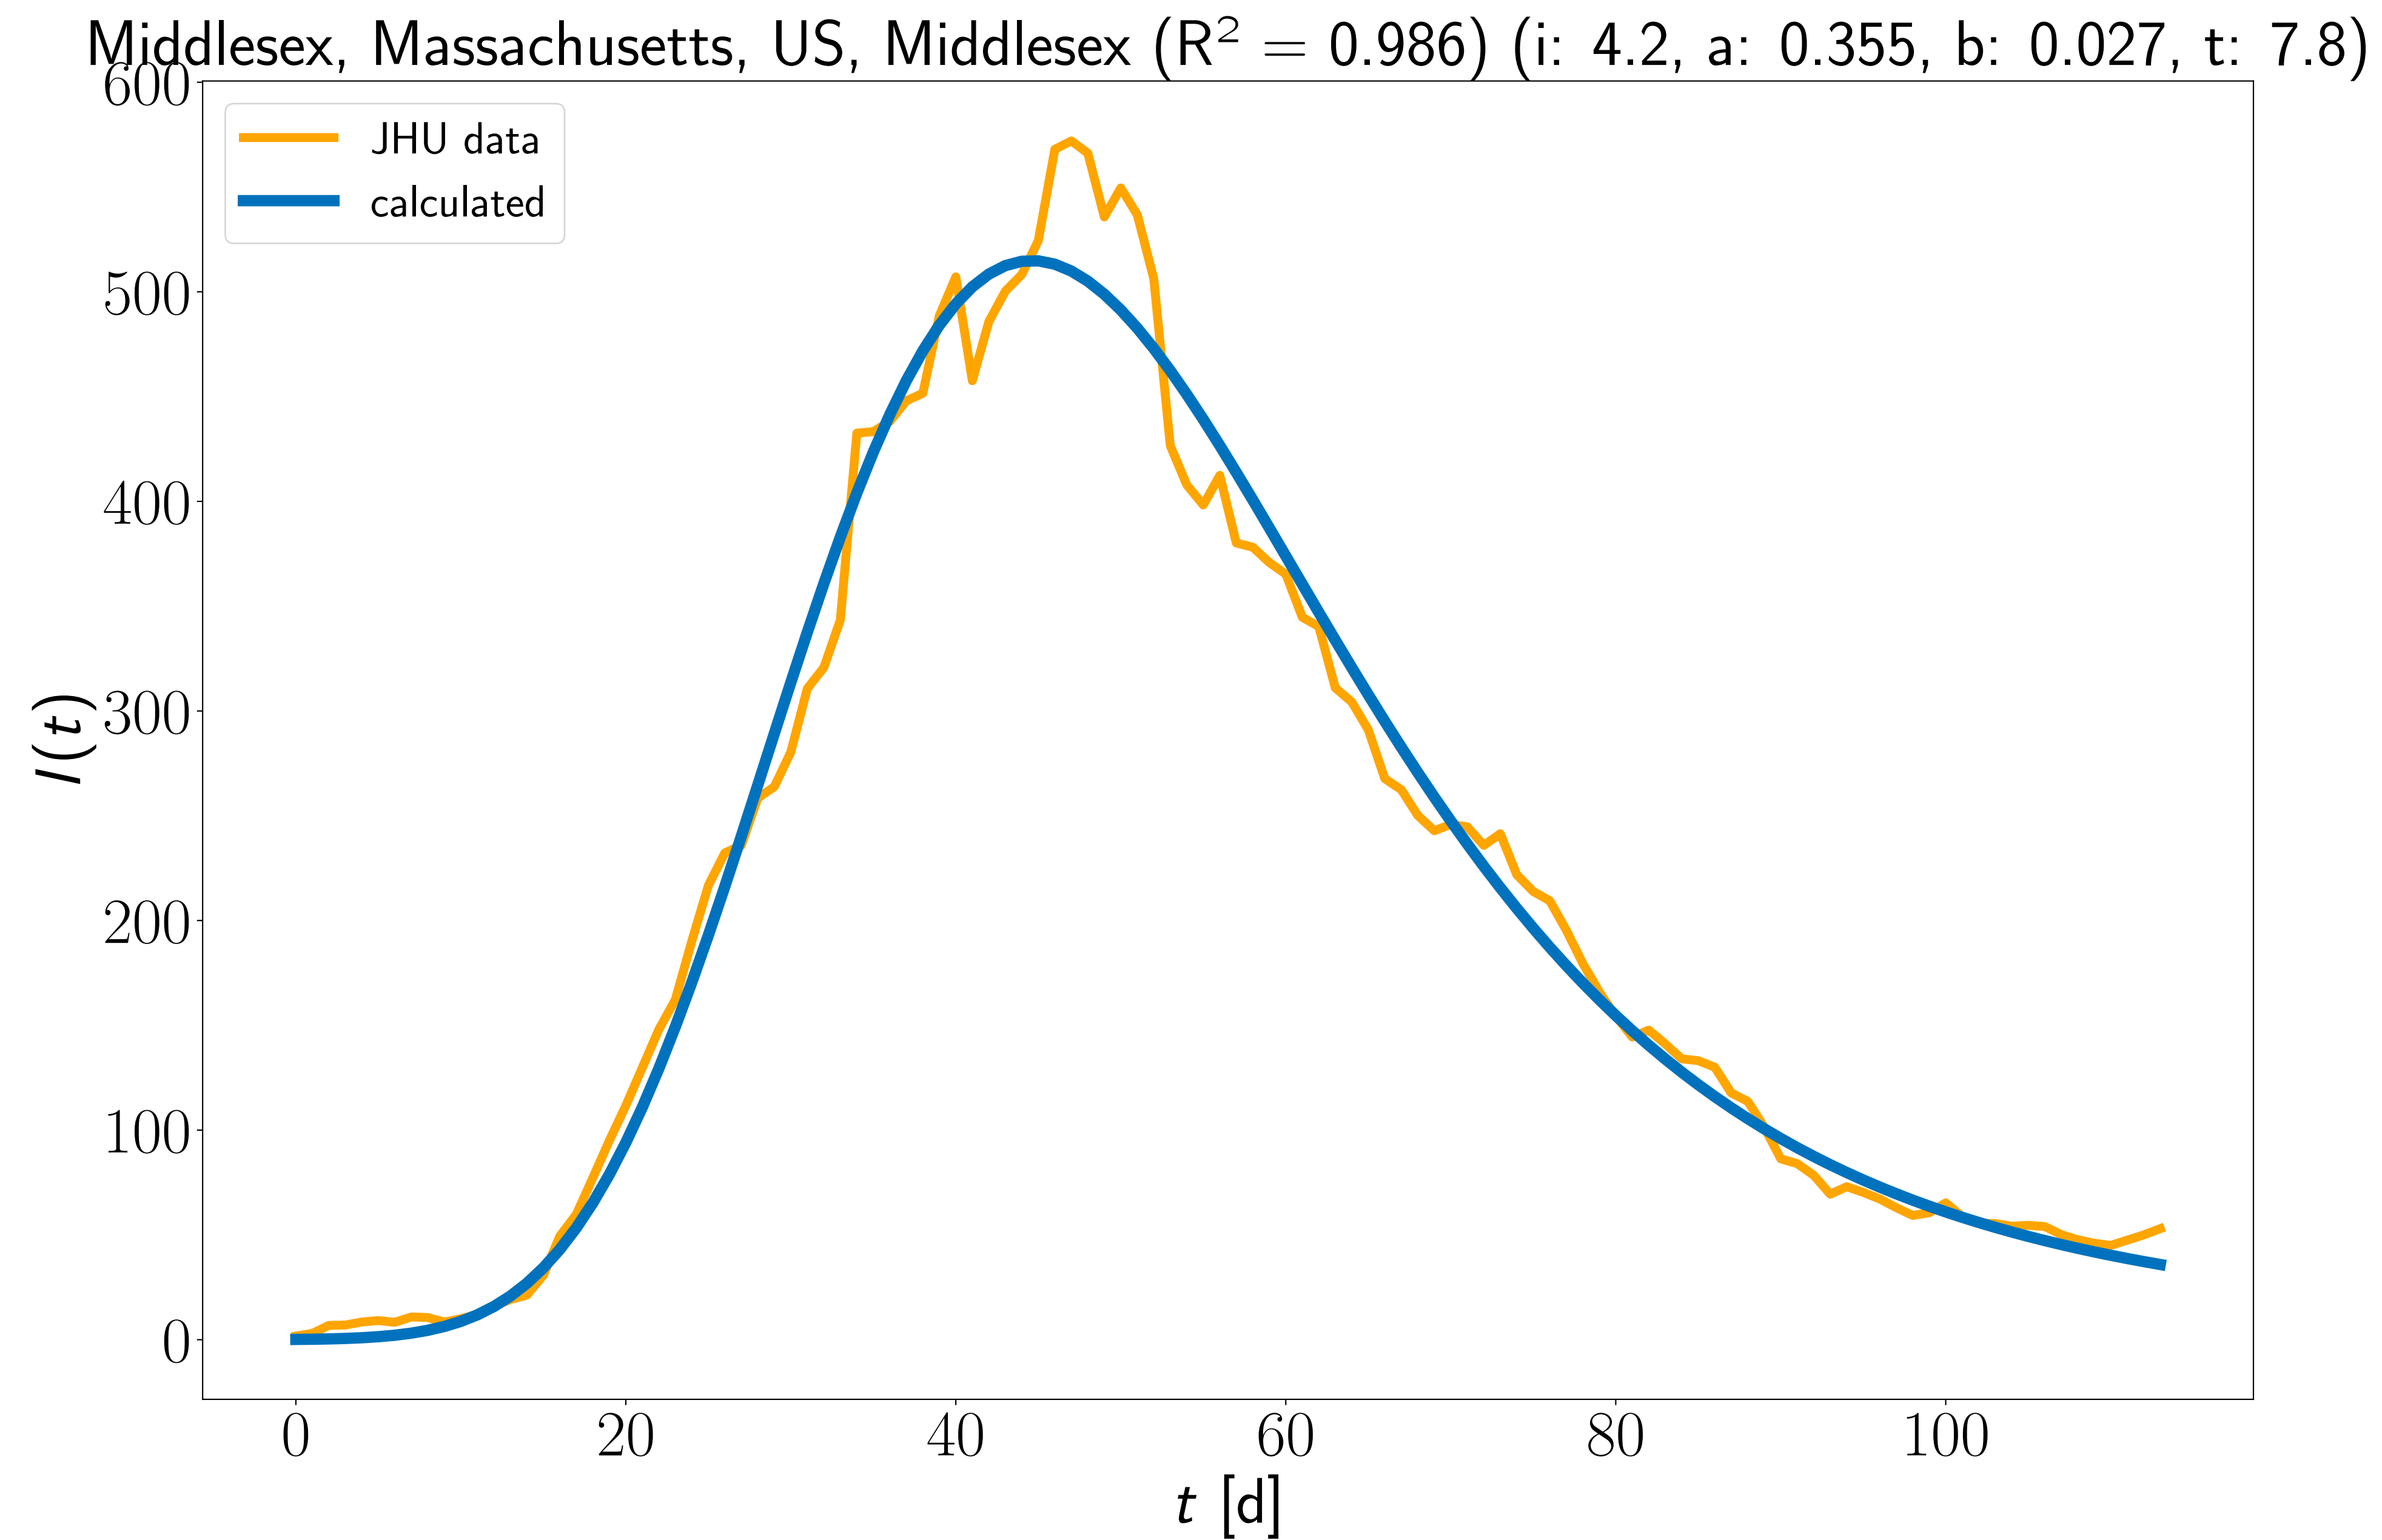

Suffolk, Massachusetts, US, Suffolk ( $R^2 = 0.815$ ) (i: 1.3, a: 0.406, b: 0.026, t: 37.9)

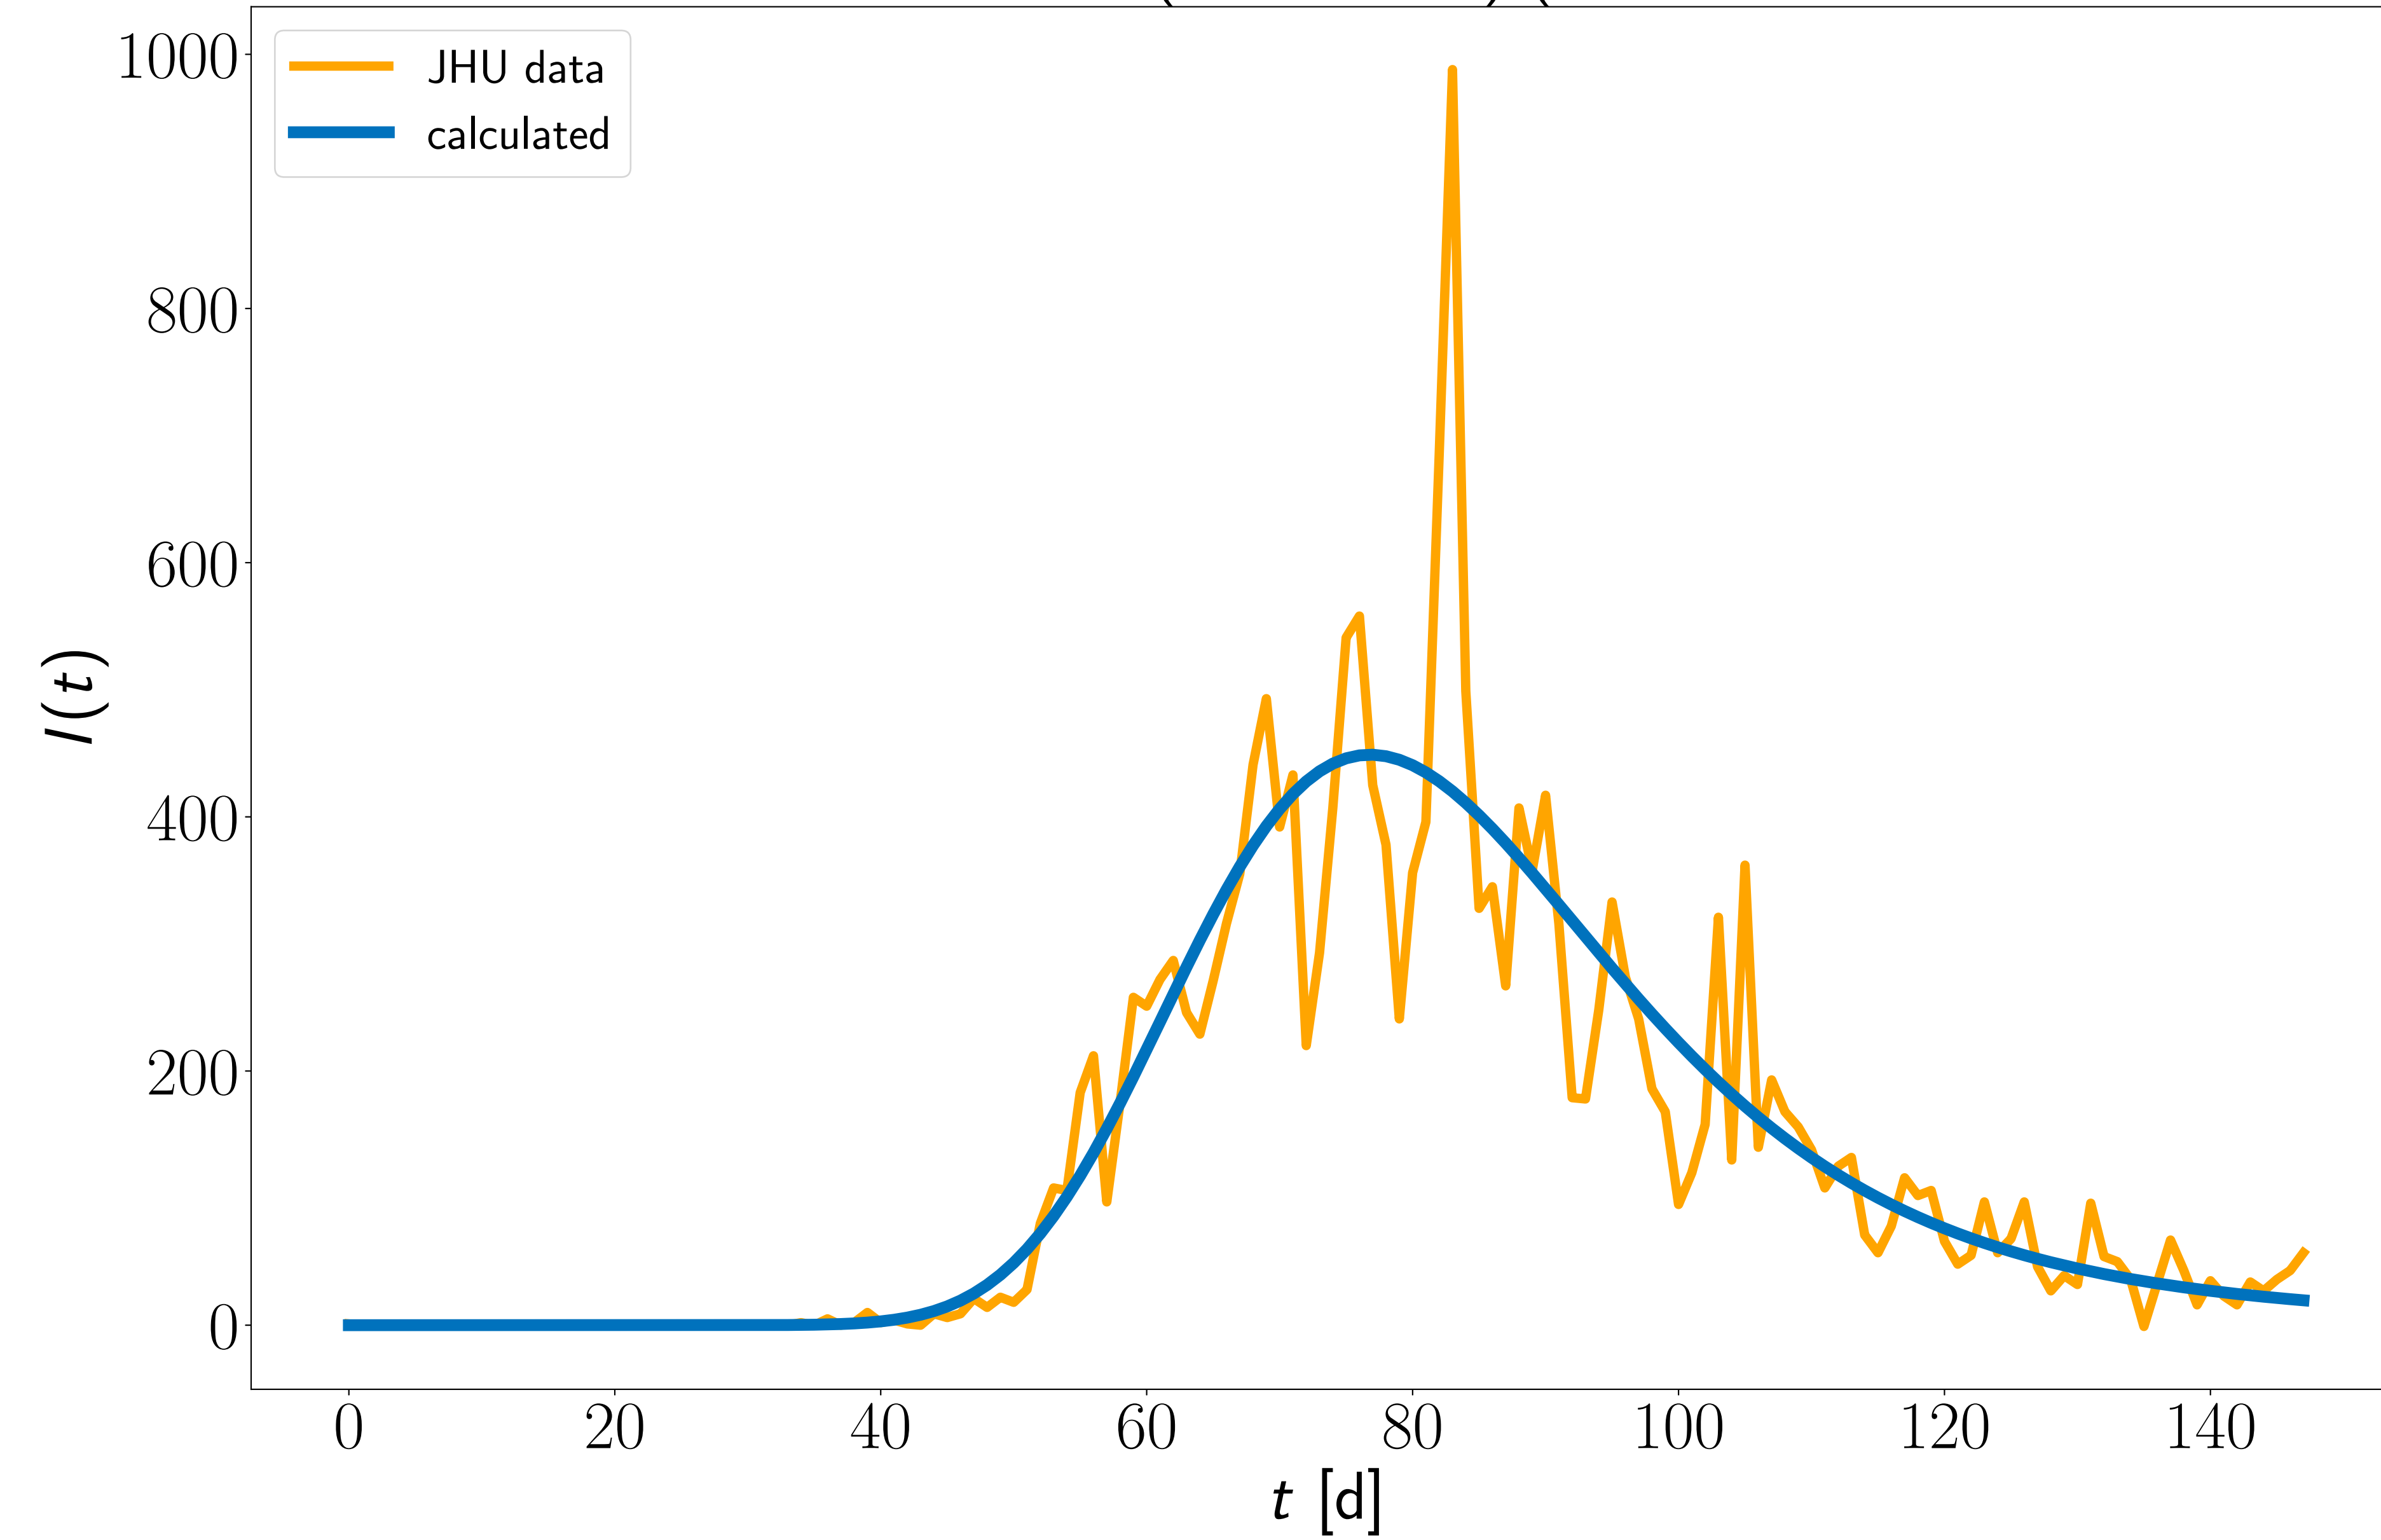

Suffolk, Massachusetts, US, Suffolk ( $R^2 = 0.974$ ) (i: 1.2, a: 0.405, b: 0.025, t: 37.4)

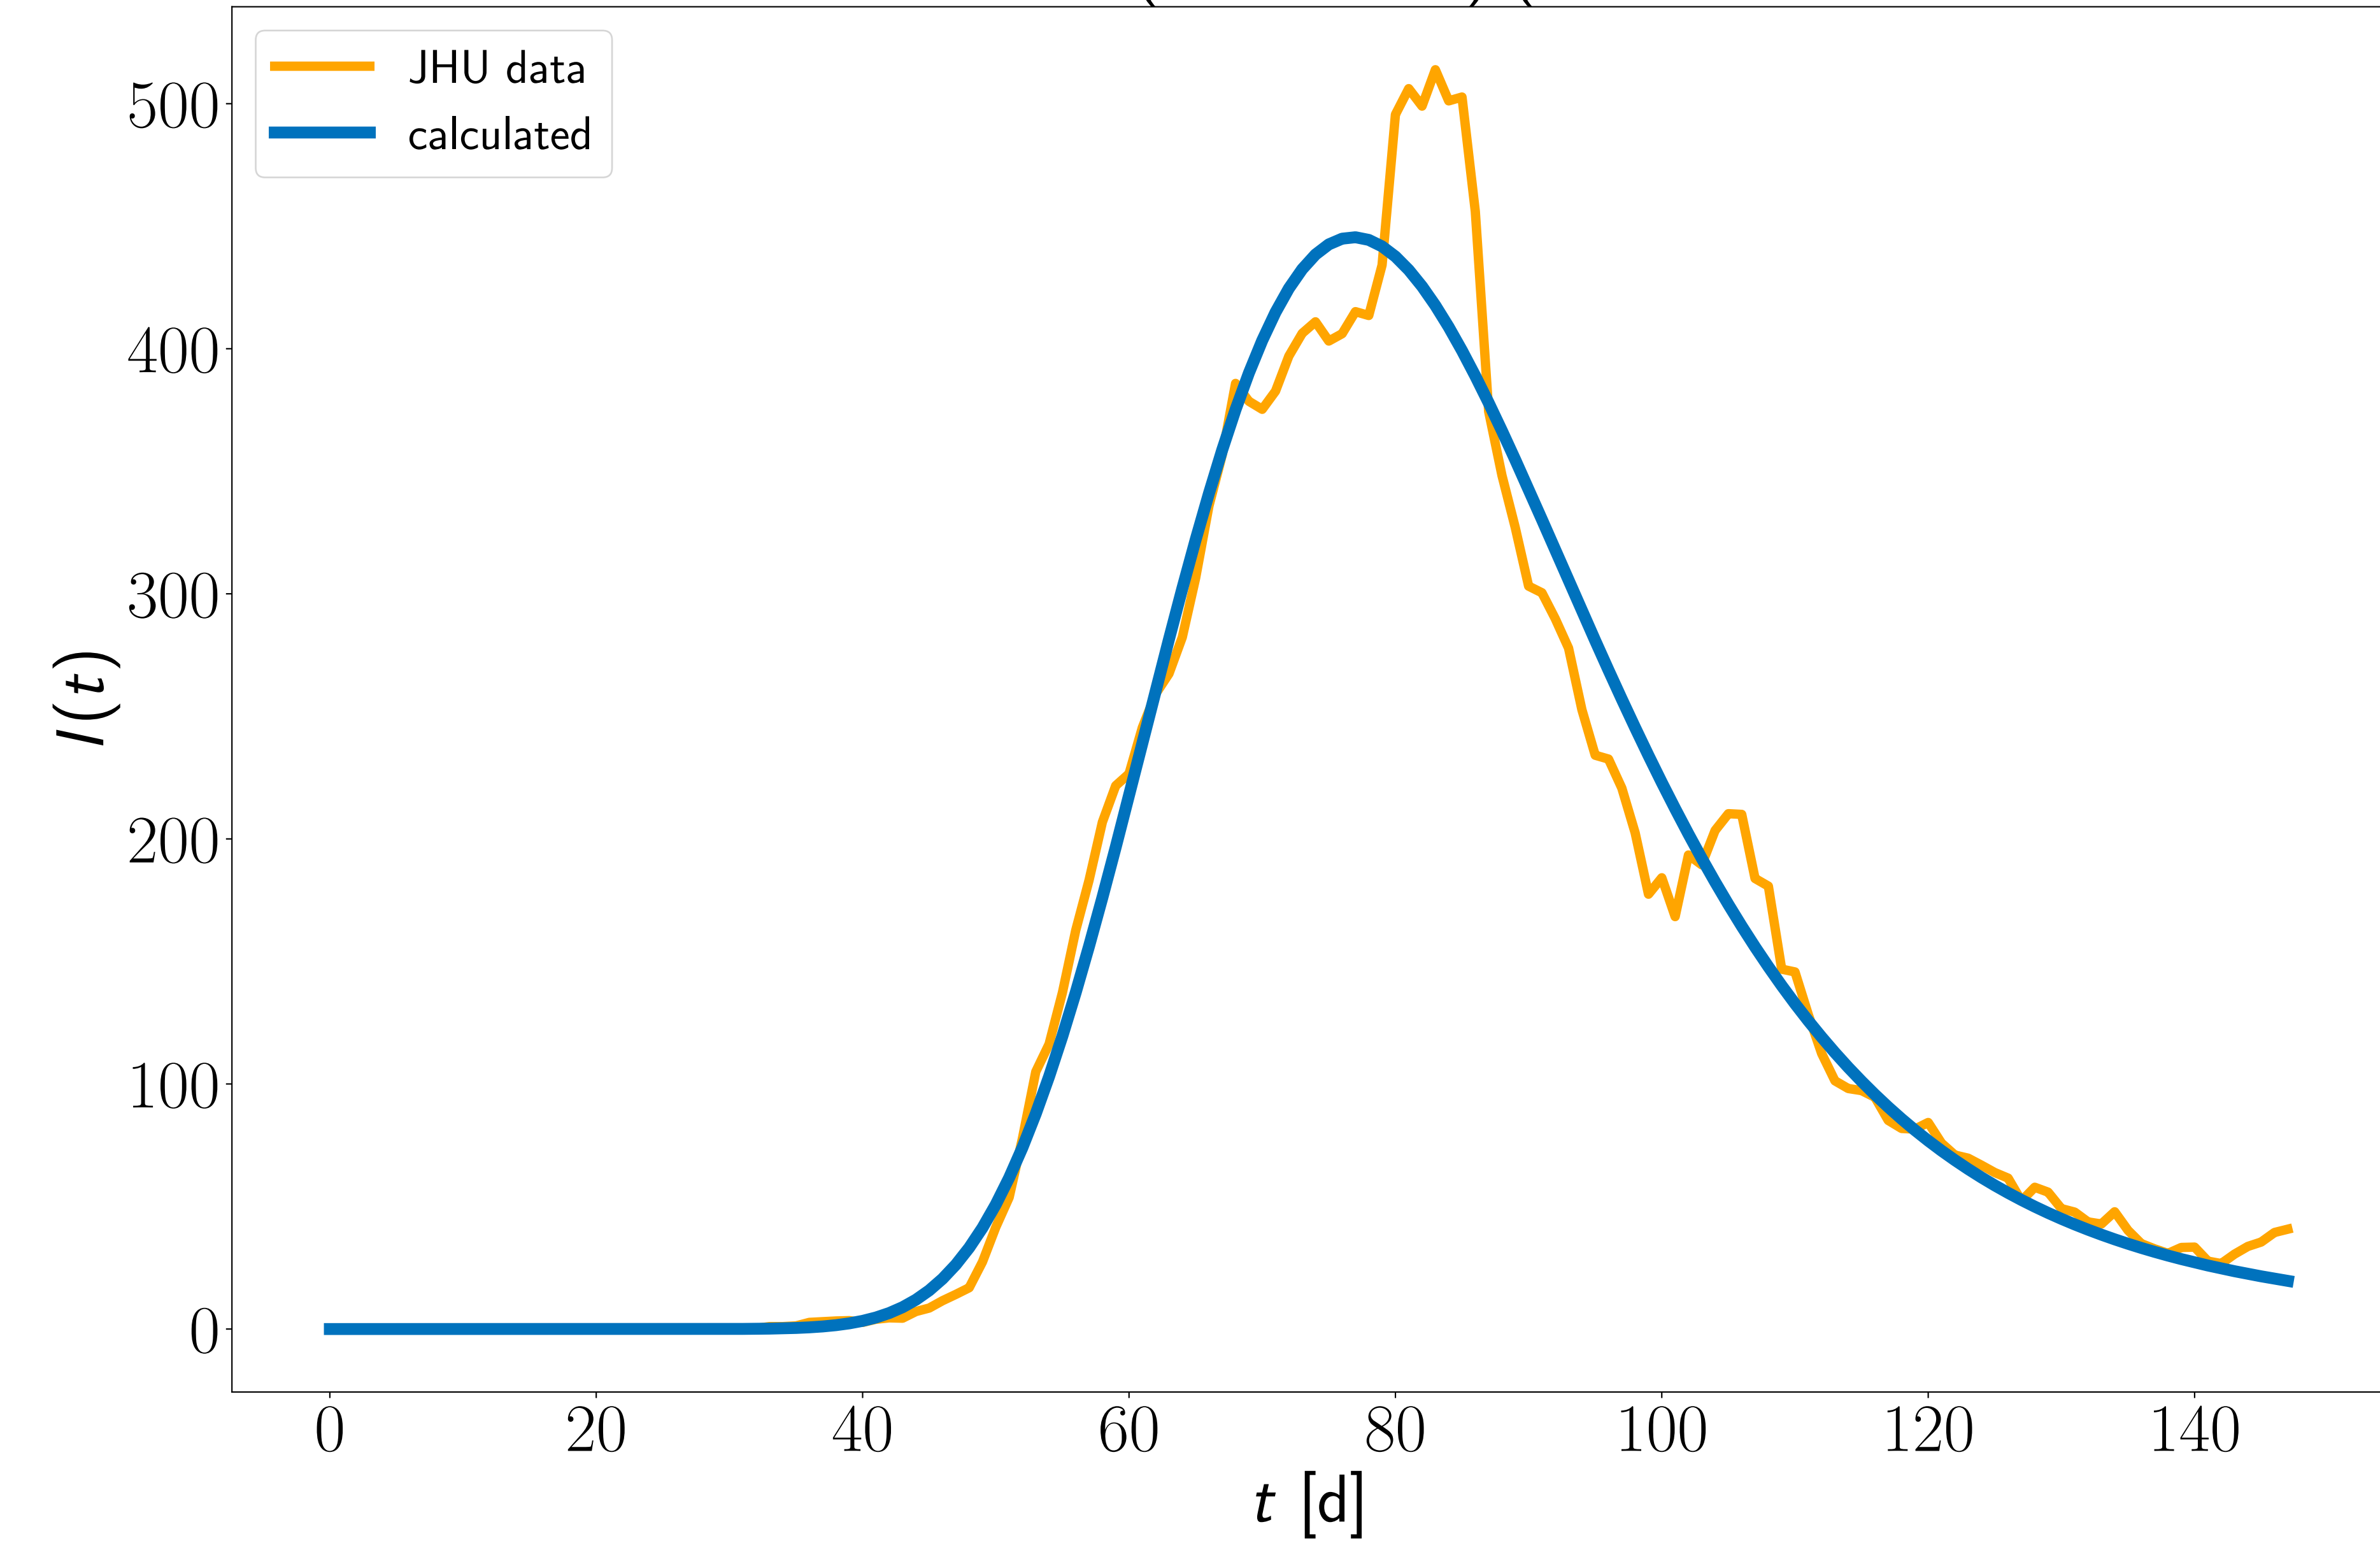

Macomb, Michigan, US, Macomb ( $R^2 = -0.957$ ) (i: 17.0, a: 0.002, b: 0.973, t: 93.9)

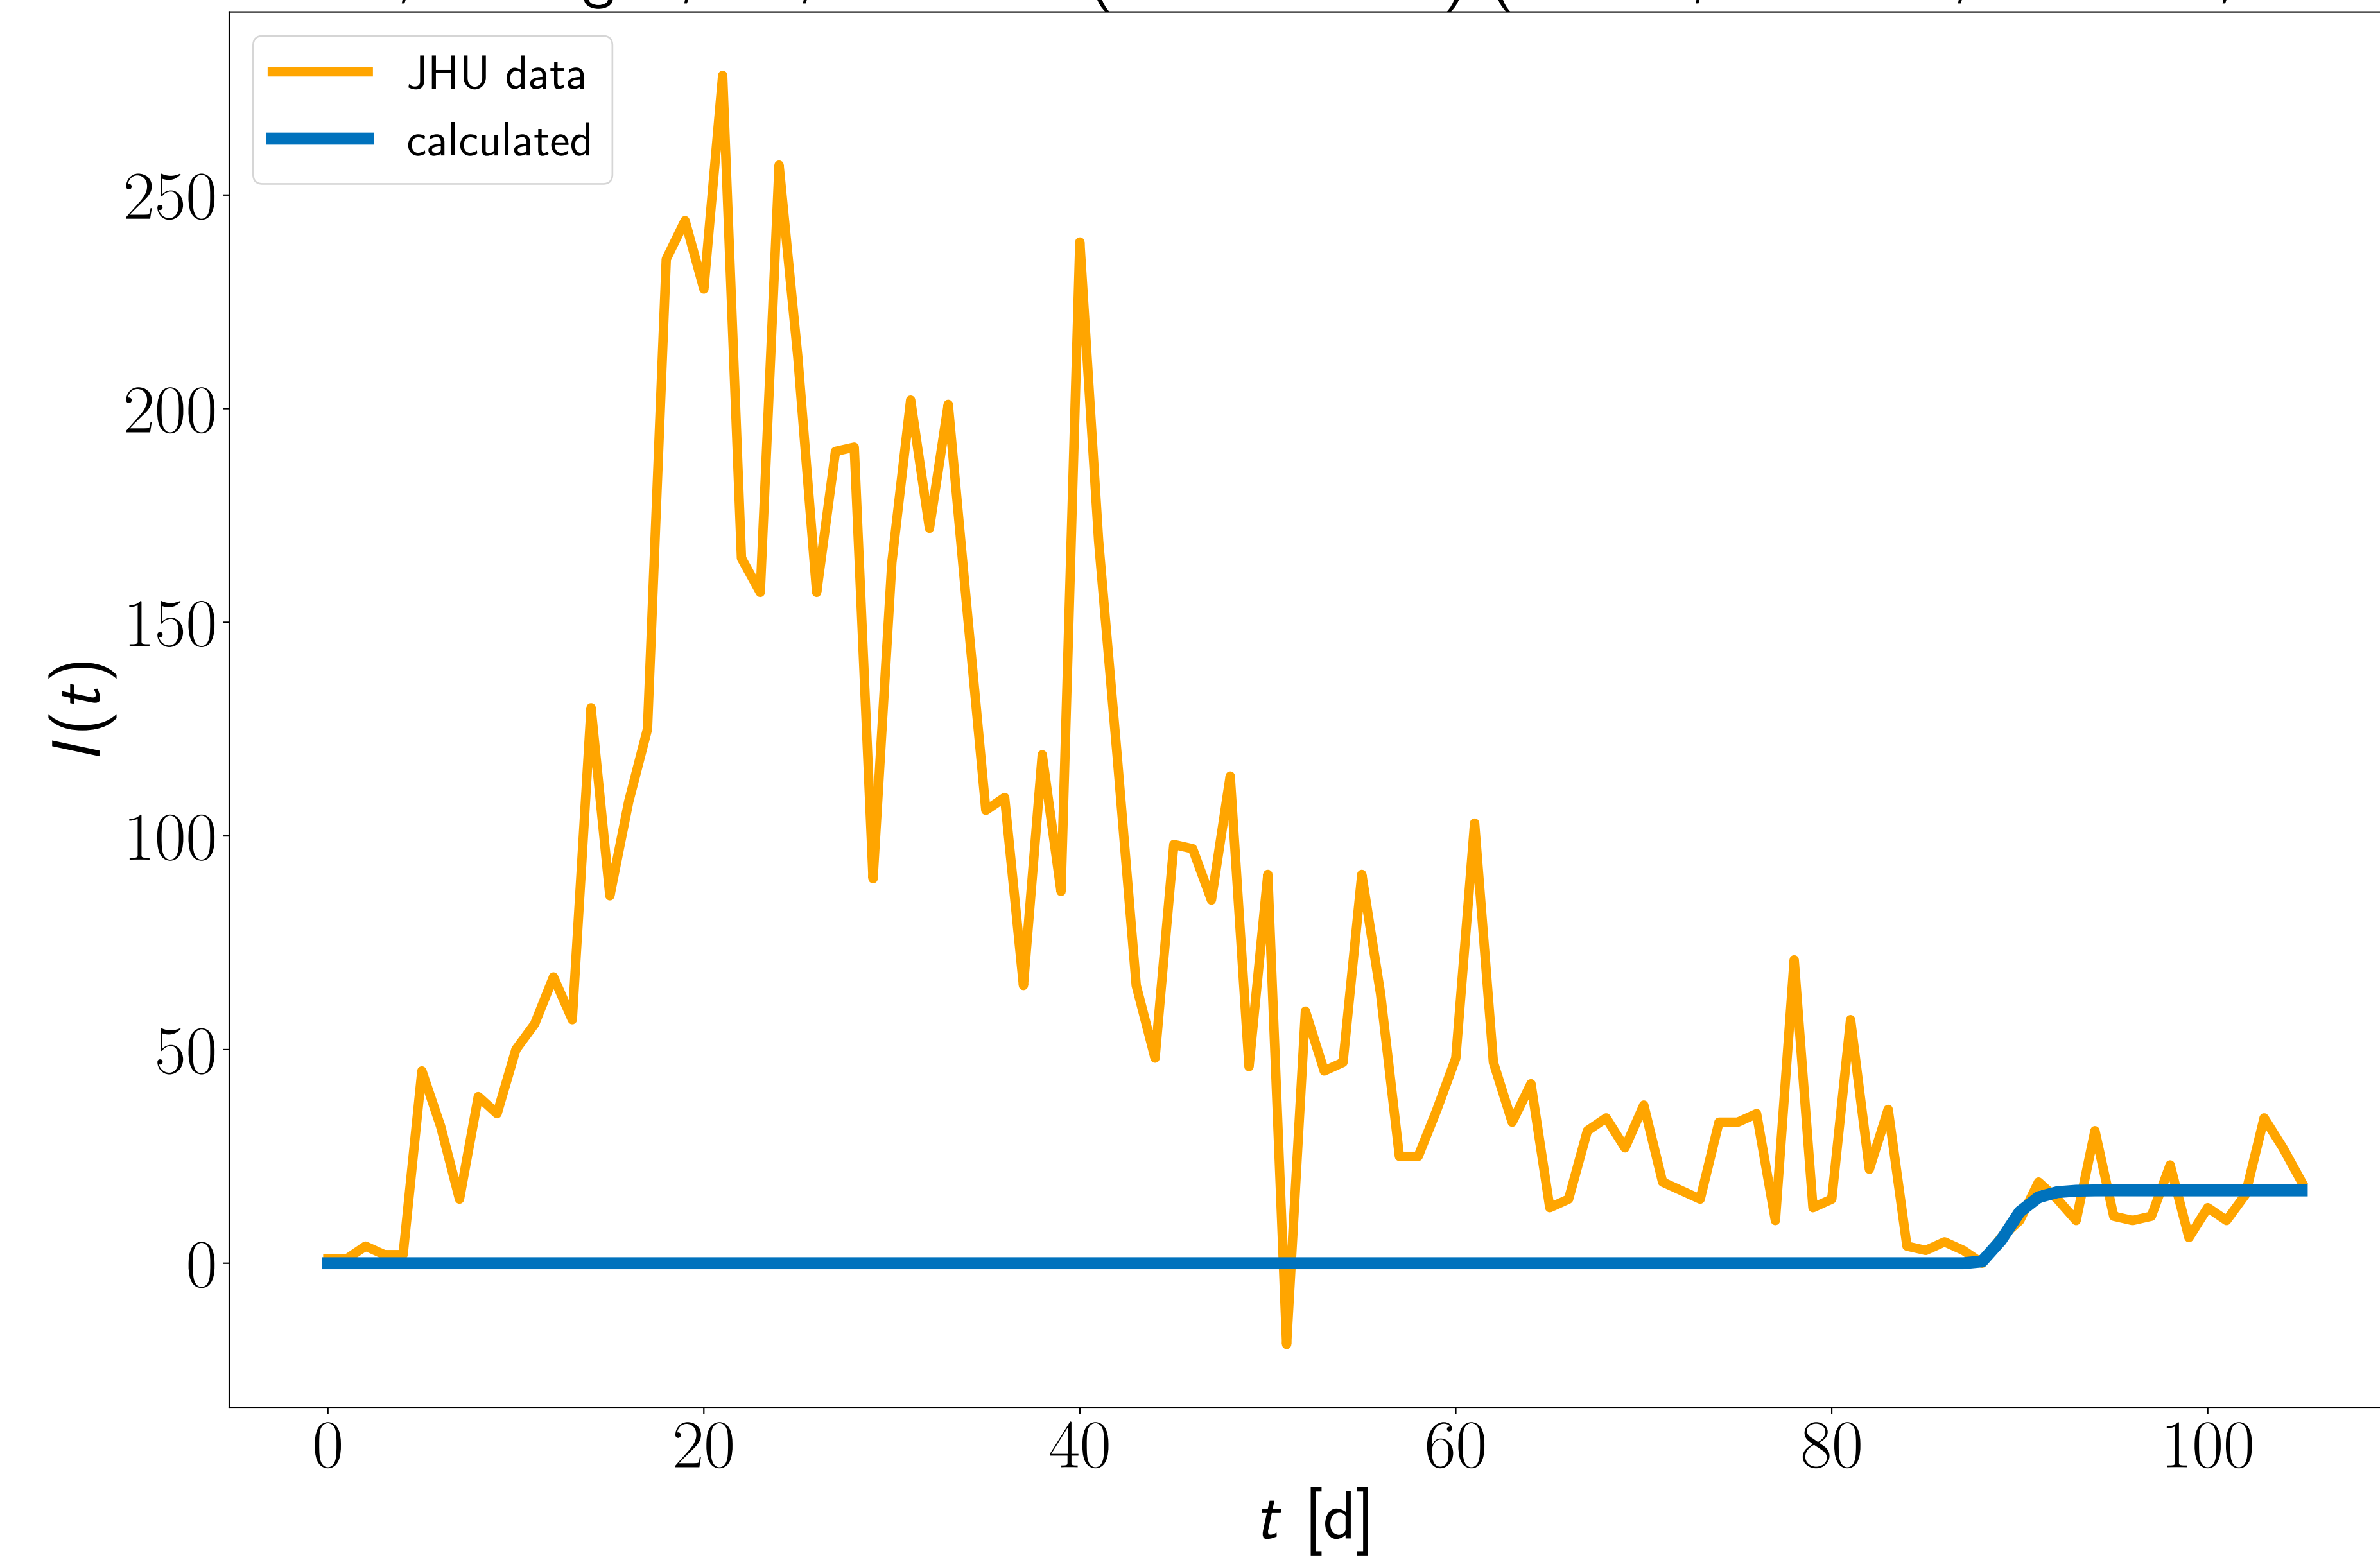

Macomb, Michigan, US, Macomb ( $R^2 = 0.976$ ) (i: 14.2, a: 0.402, b: 0.056, t: 5.9)

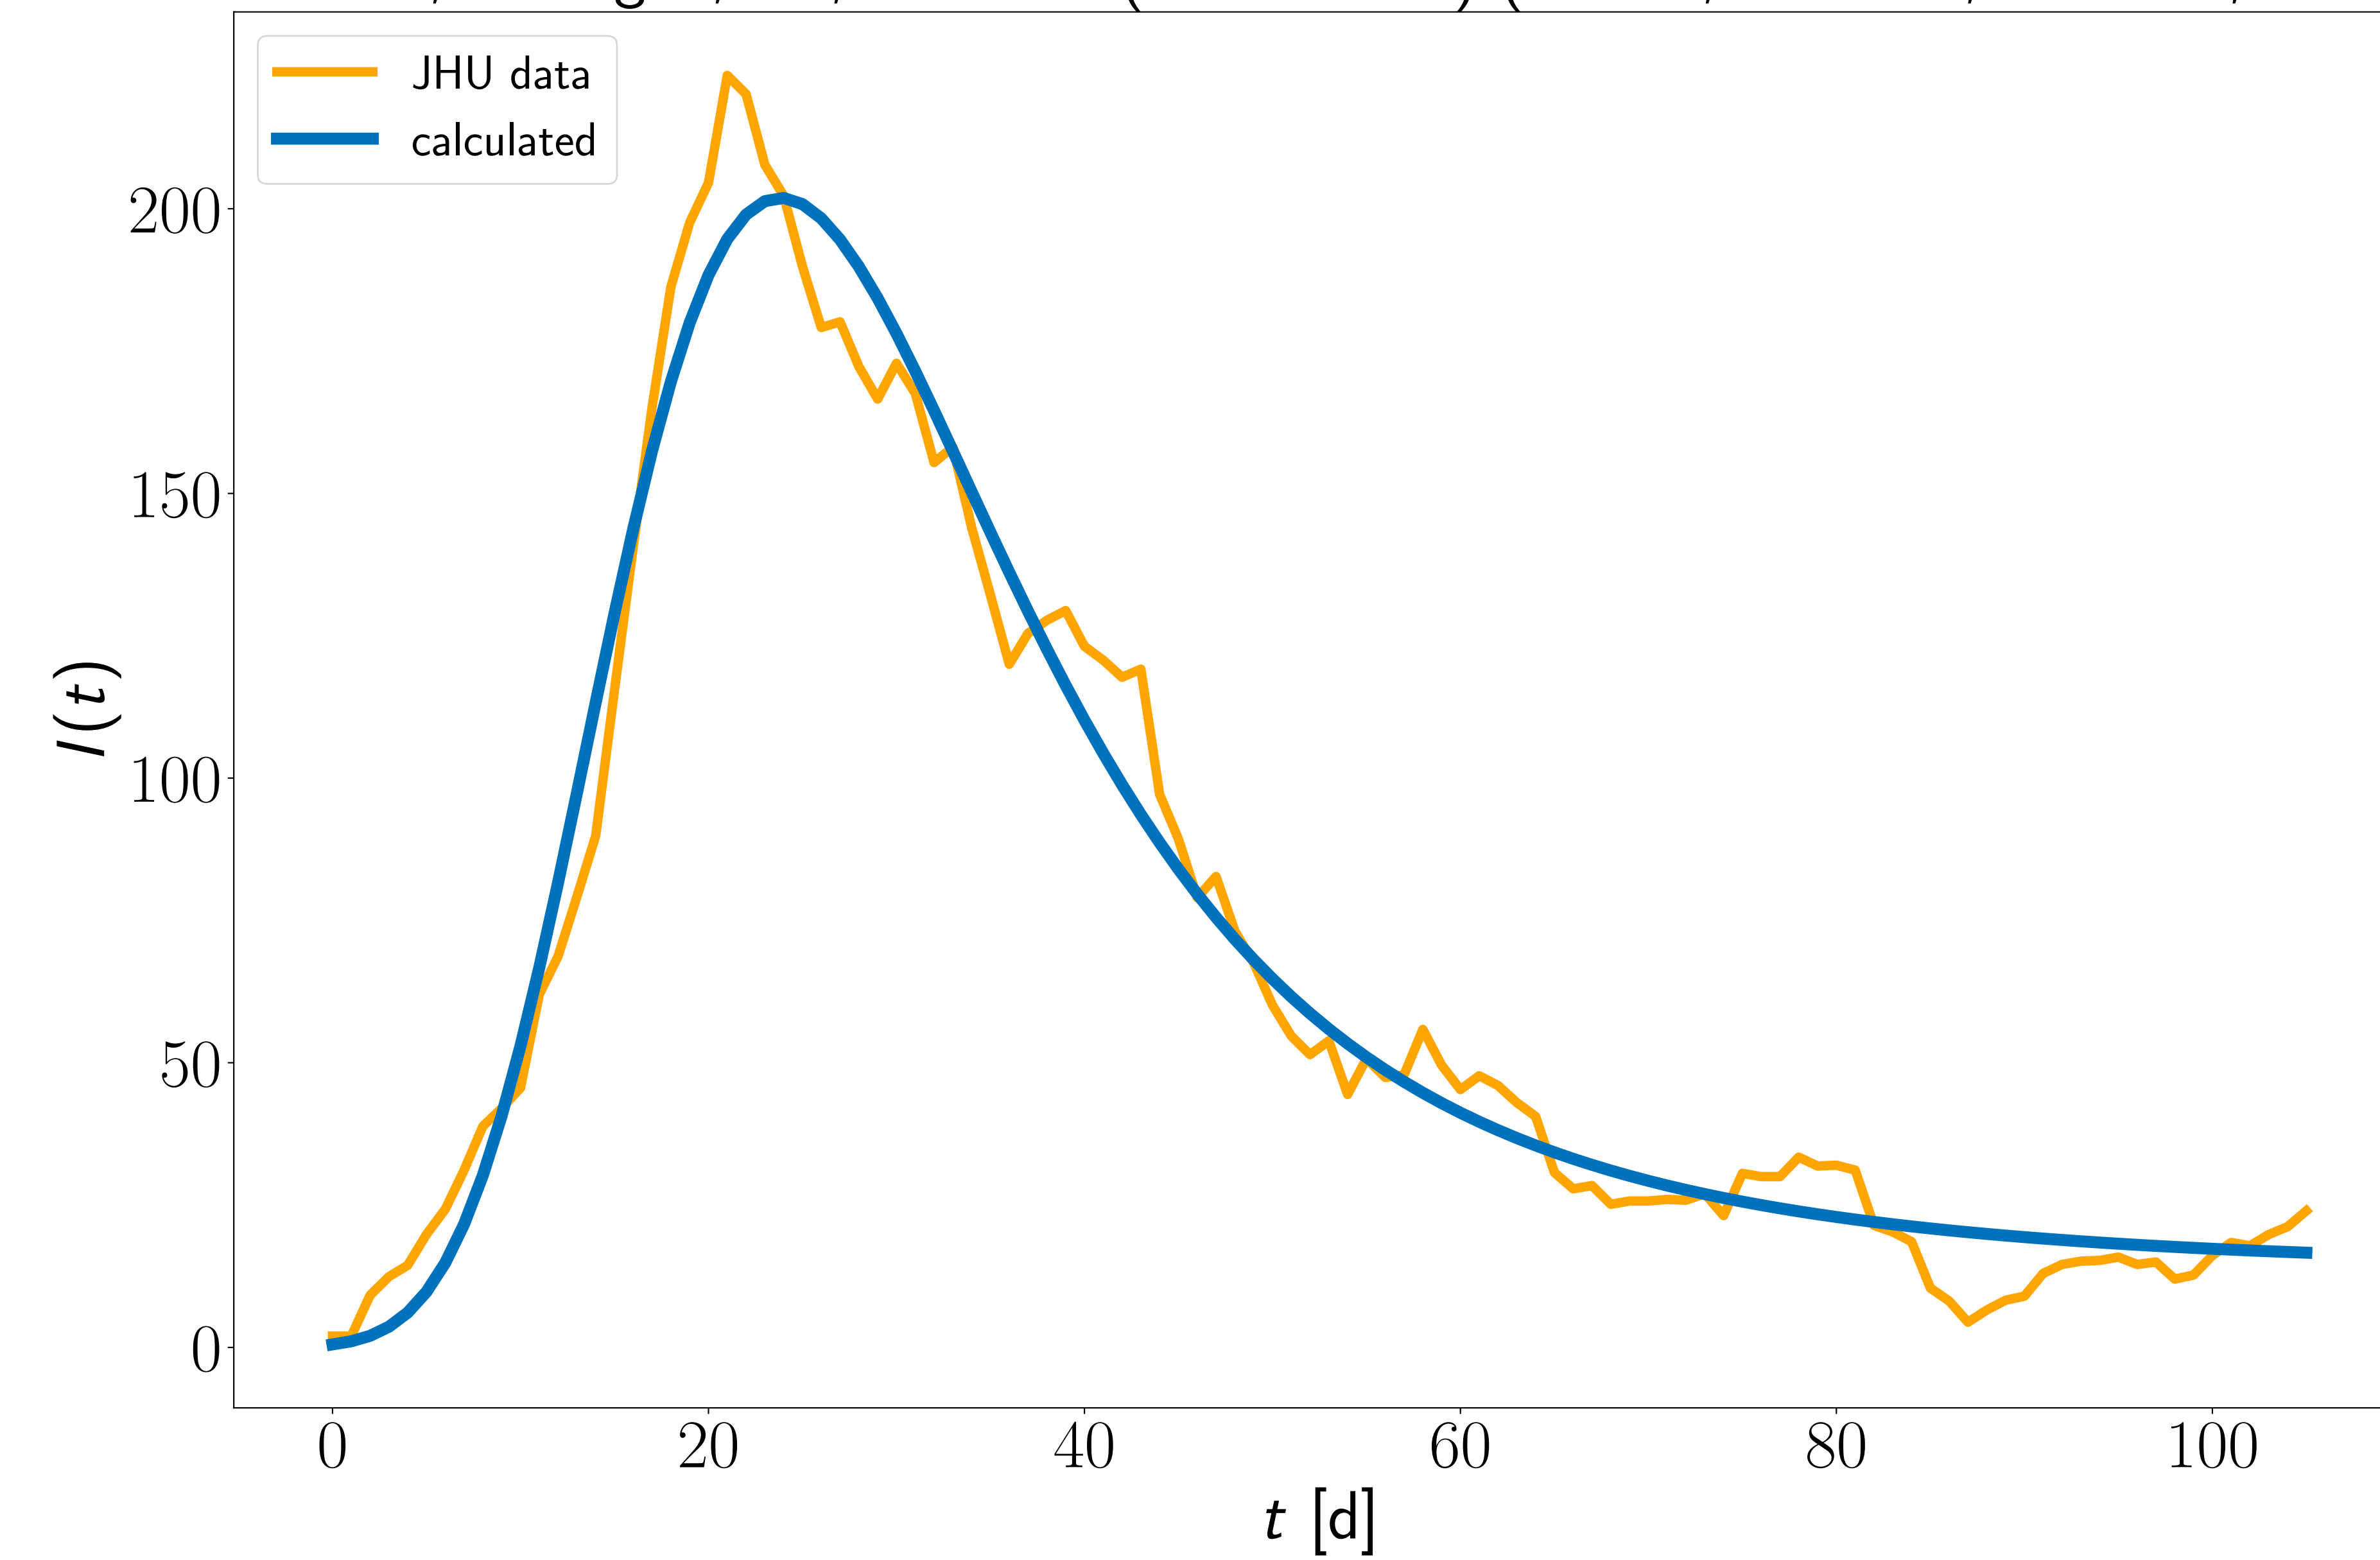

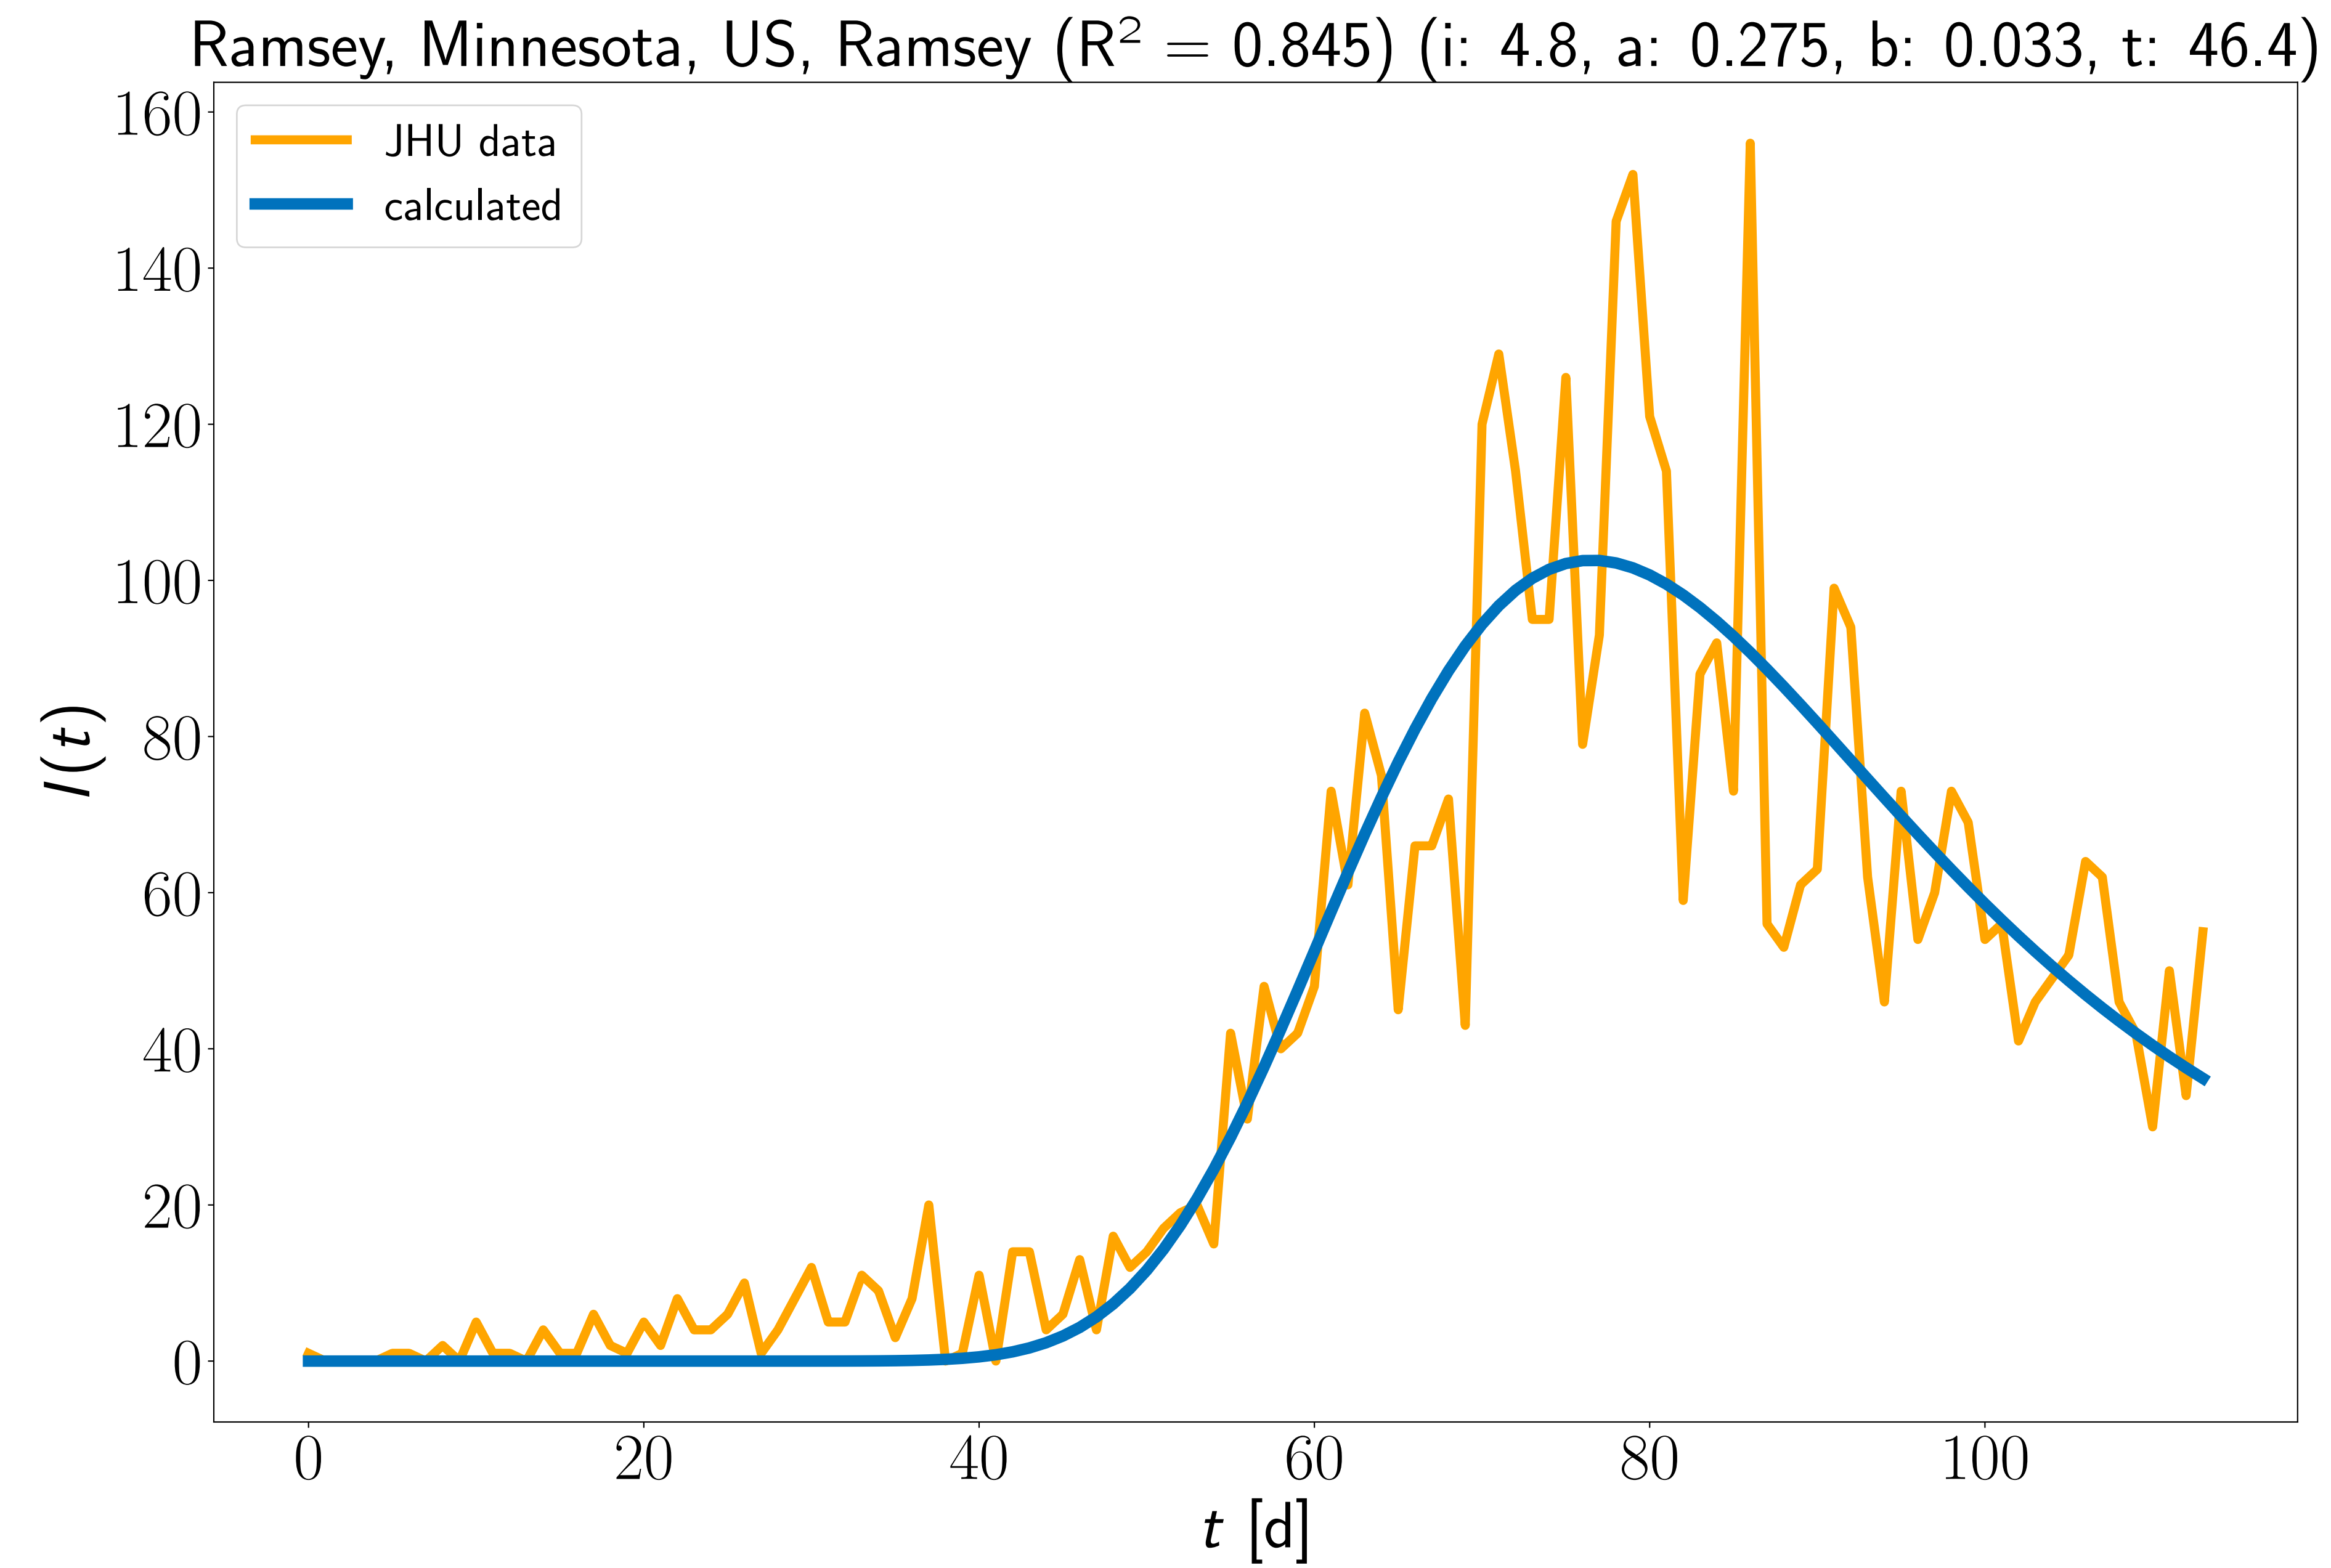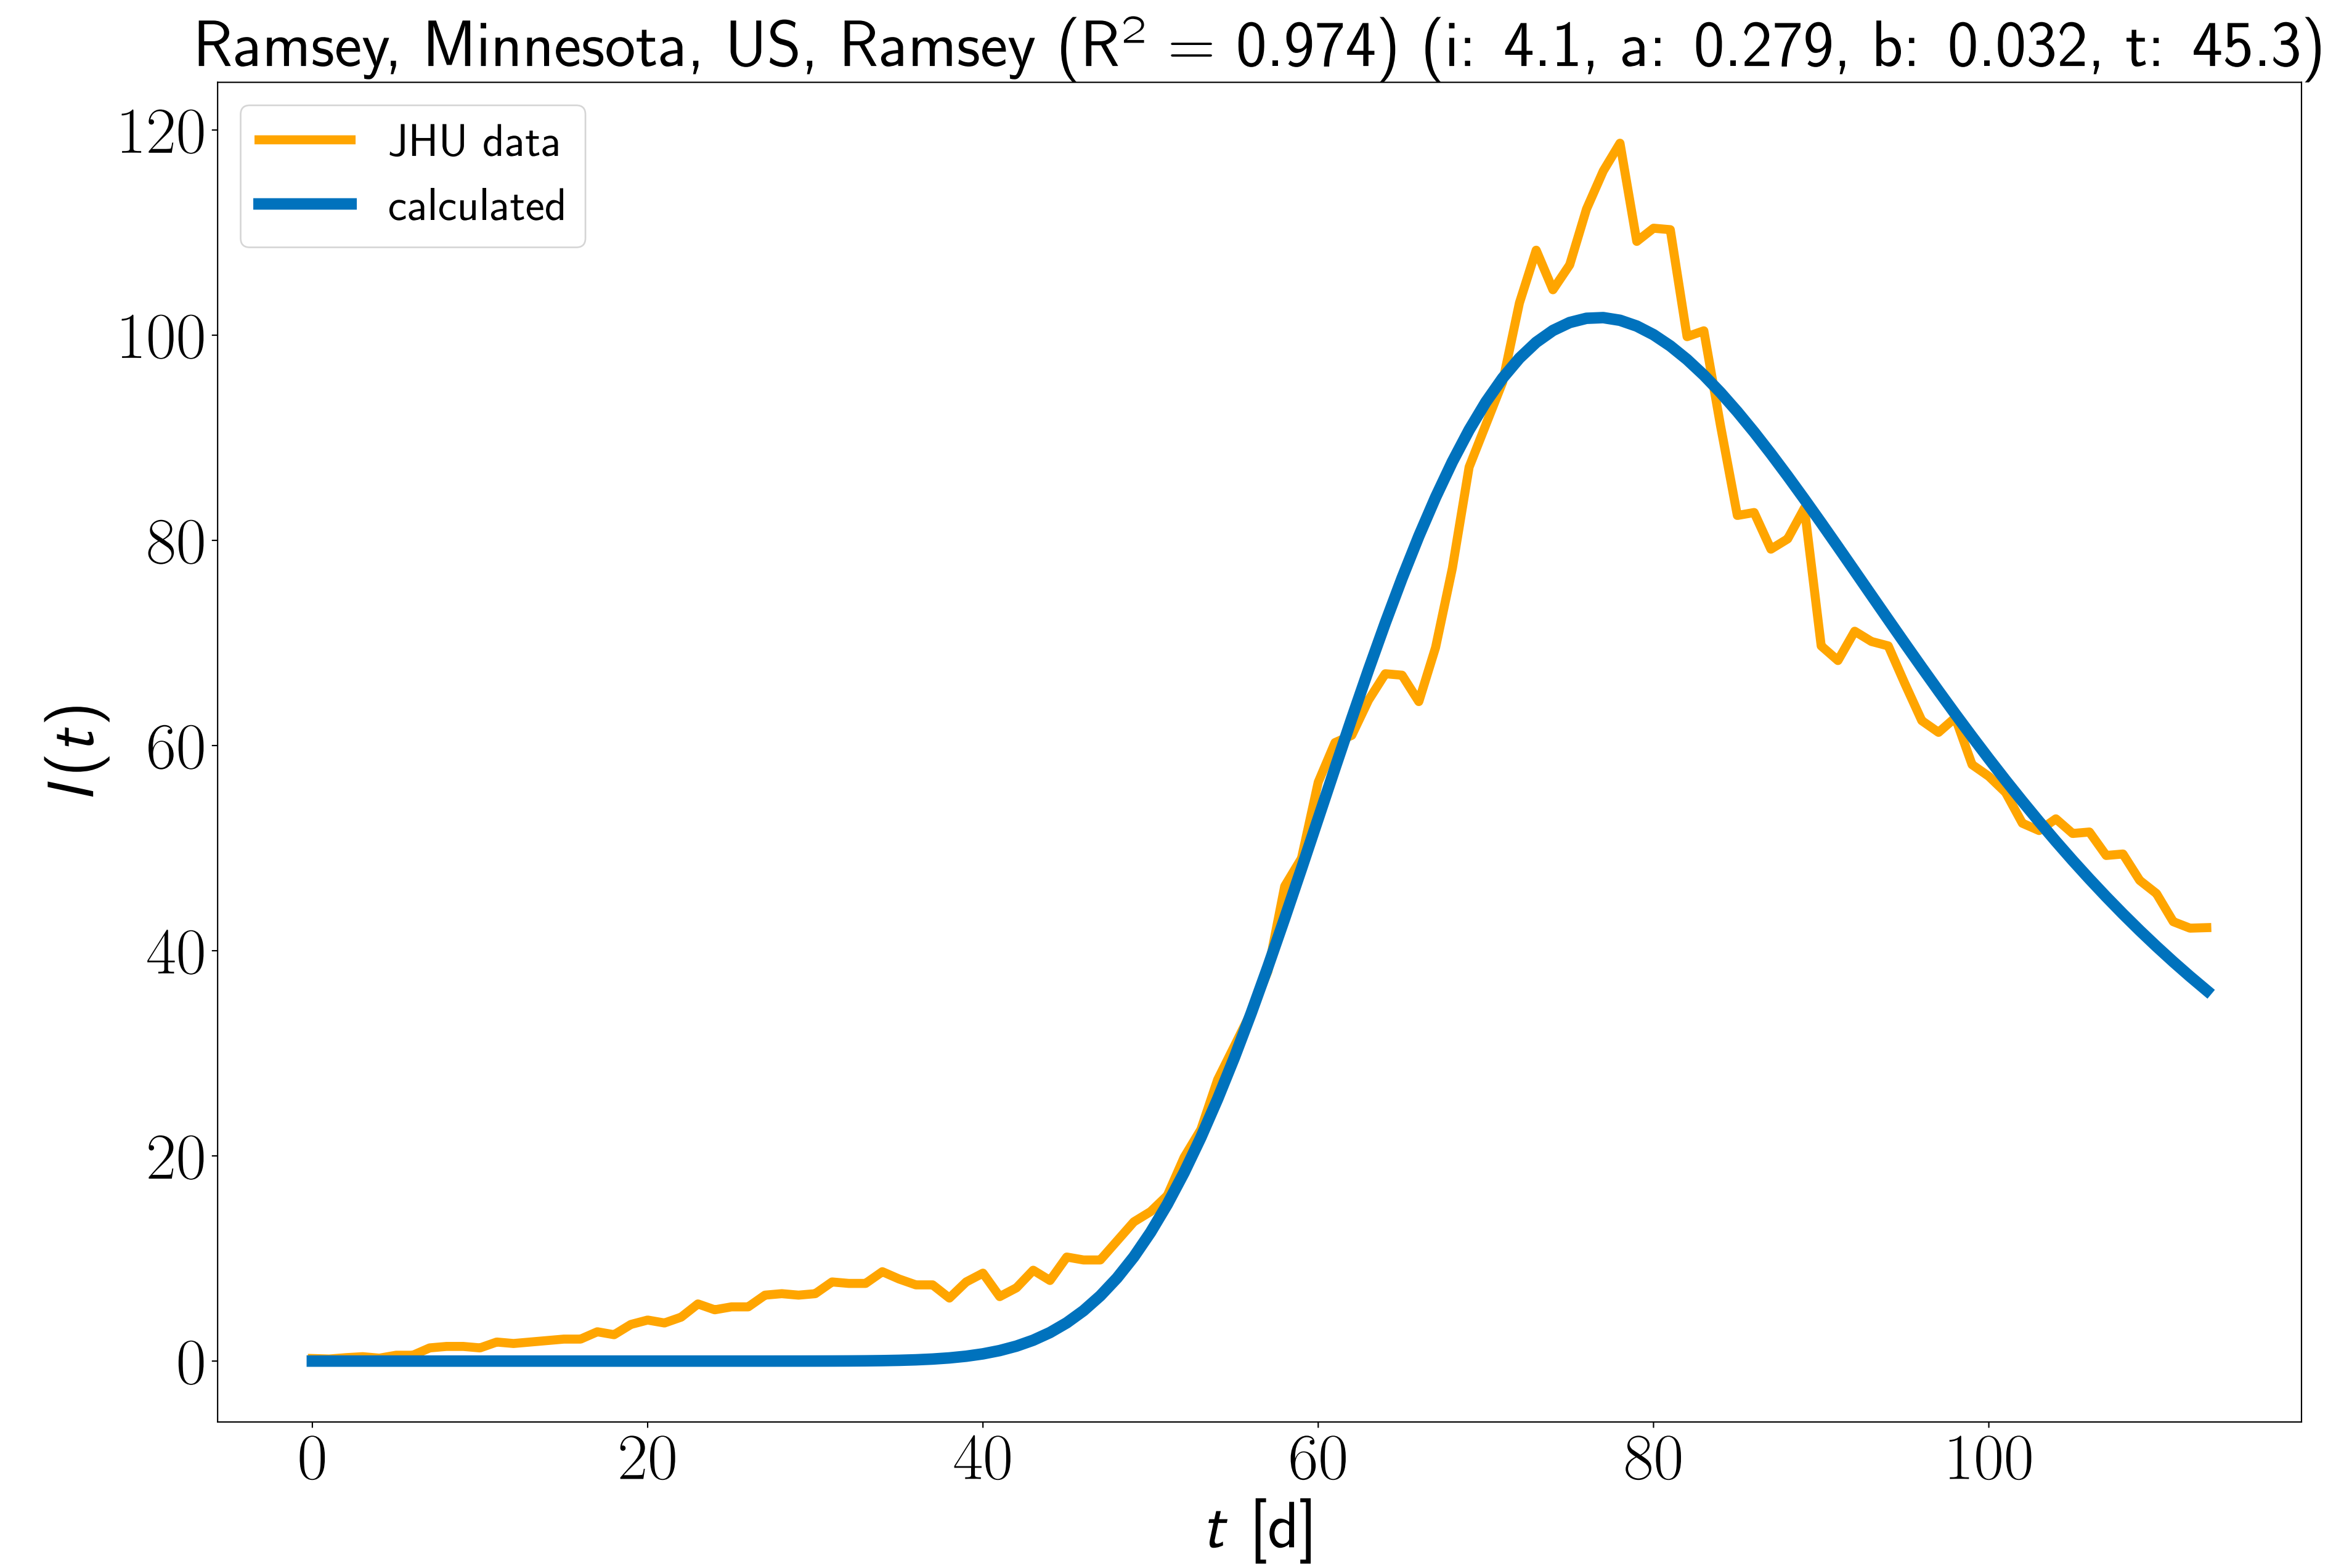

Stearns, Minnesota, US, Stearns ( $R^2 = 0.841$ ) (i: 5.4, a: 0.951, b: 0.11, t: 43.8)

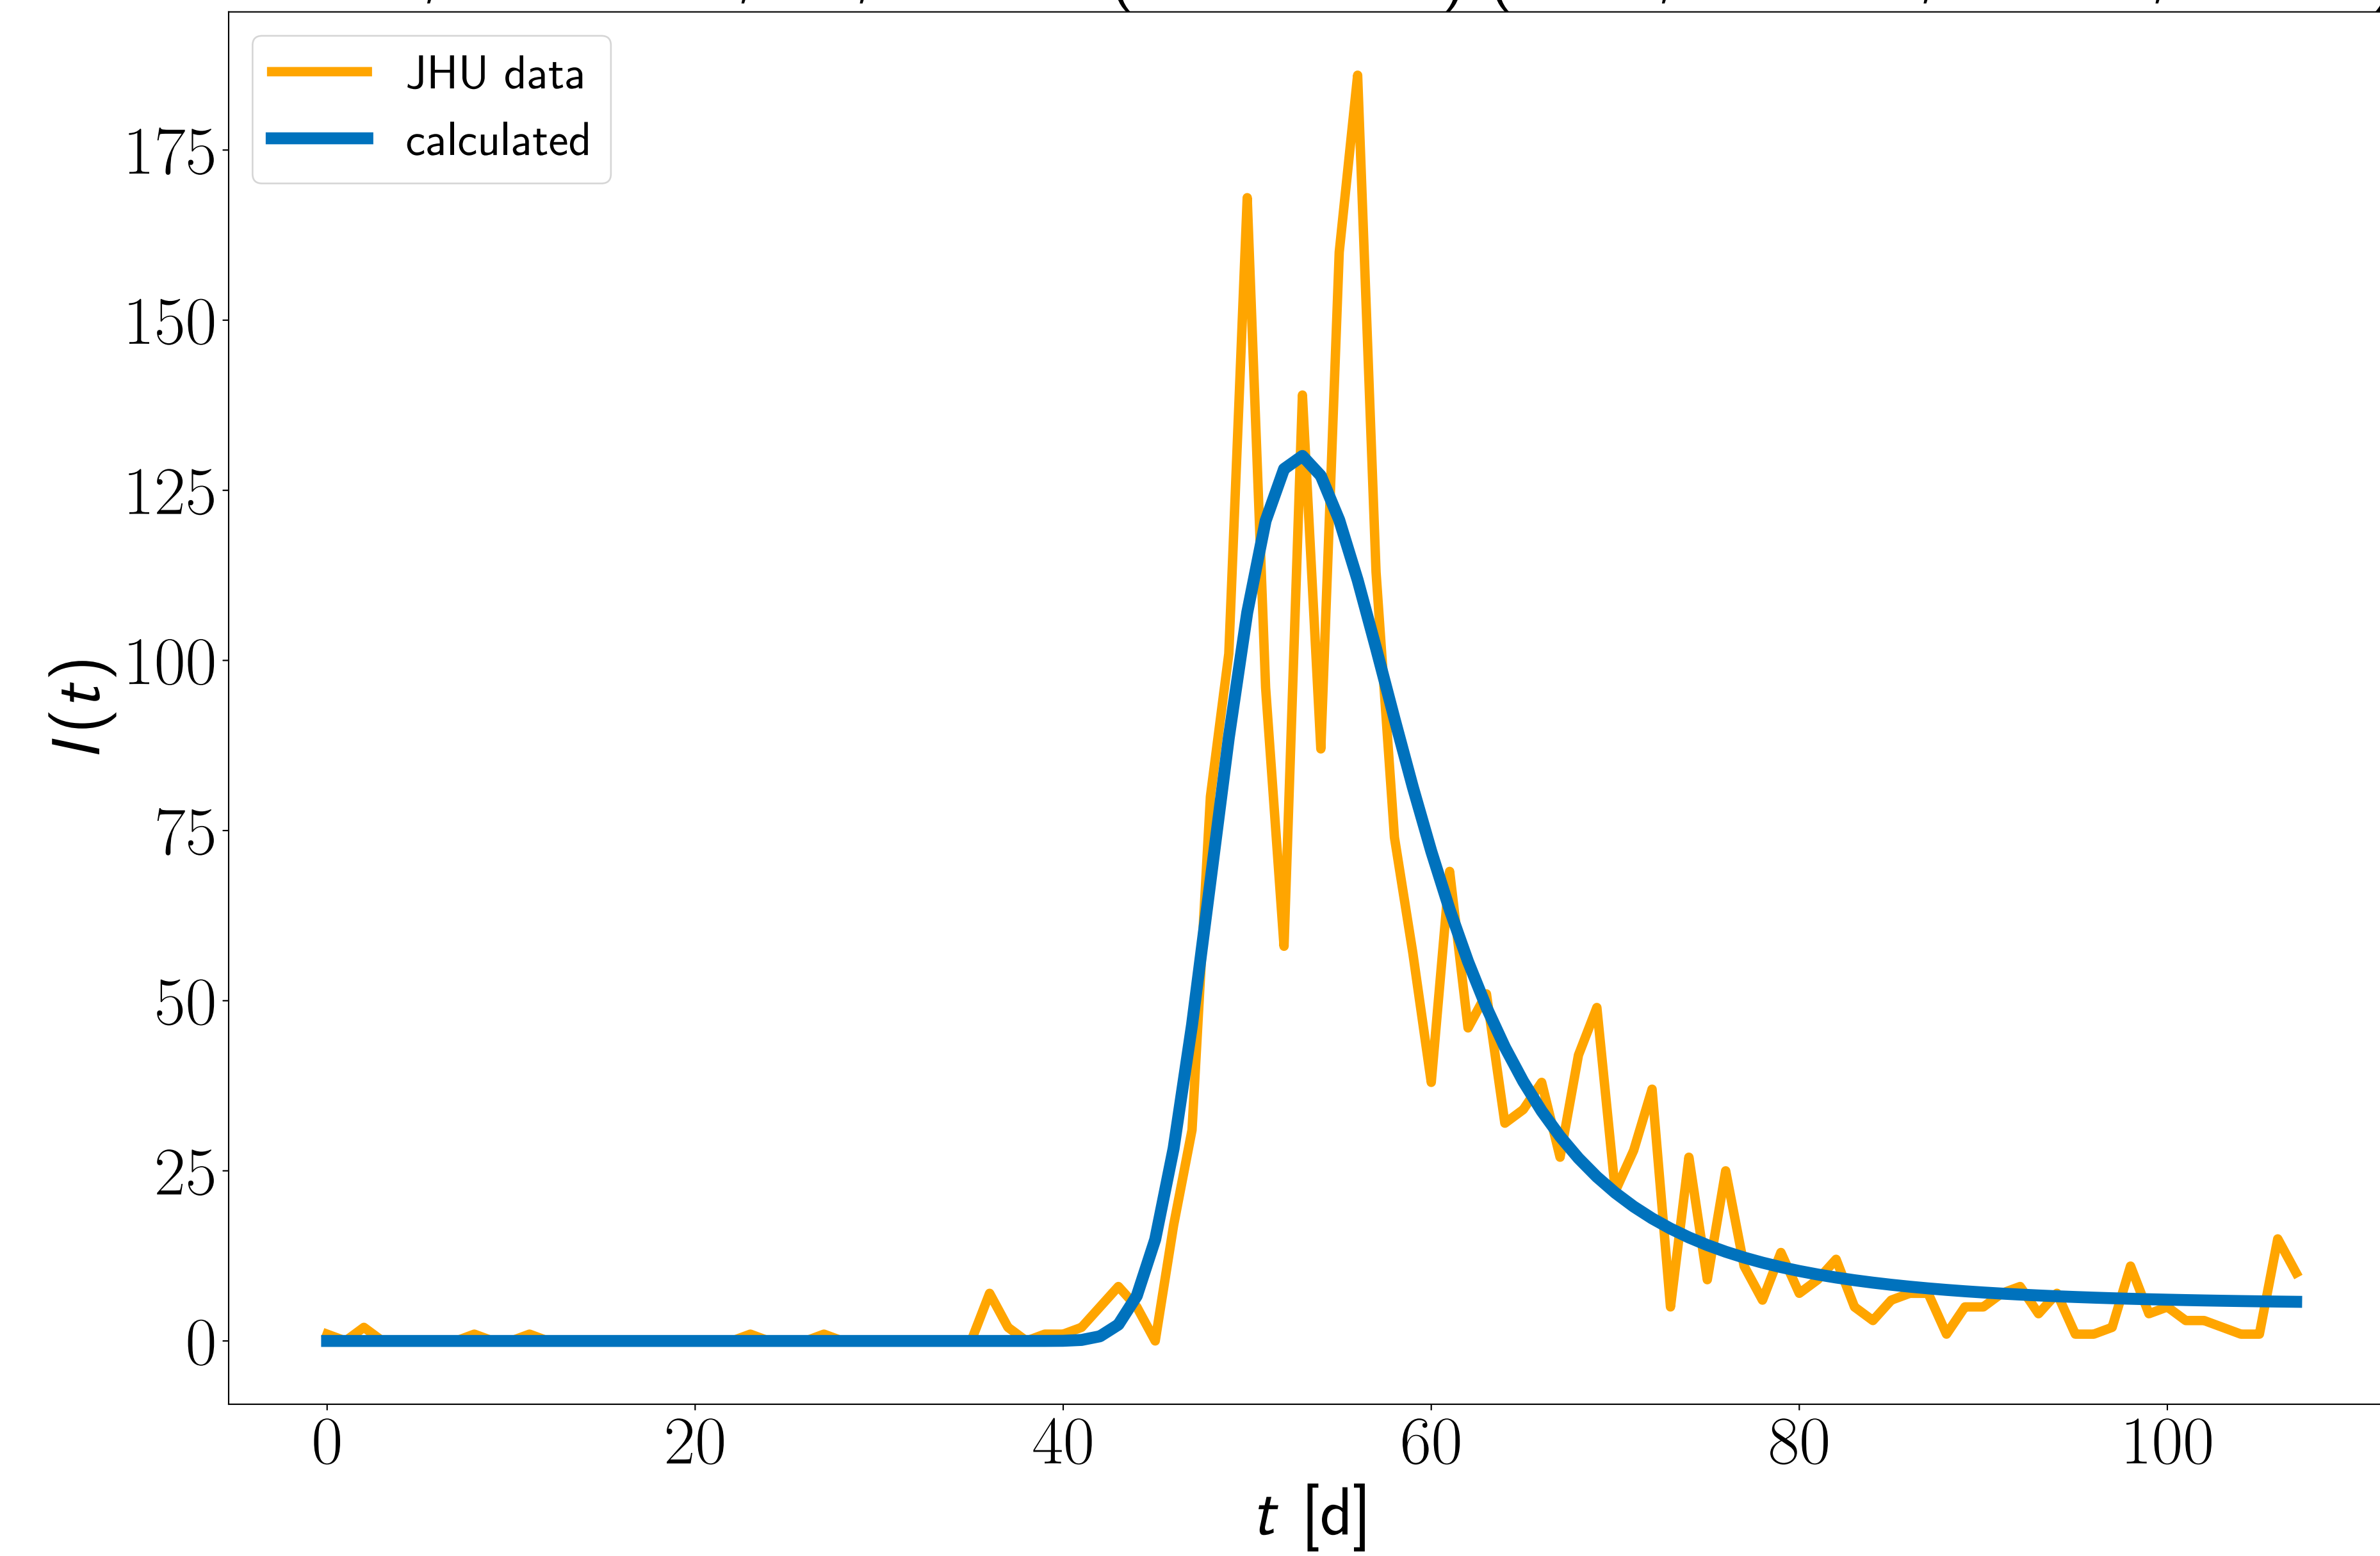

Stearns, Minnesota, US, Stearns ( $R^2 = 0.989$ ) (i: 4.2, a: 0.885, b: 0.097, t: 42.8)

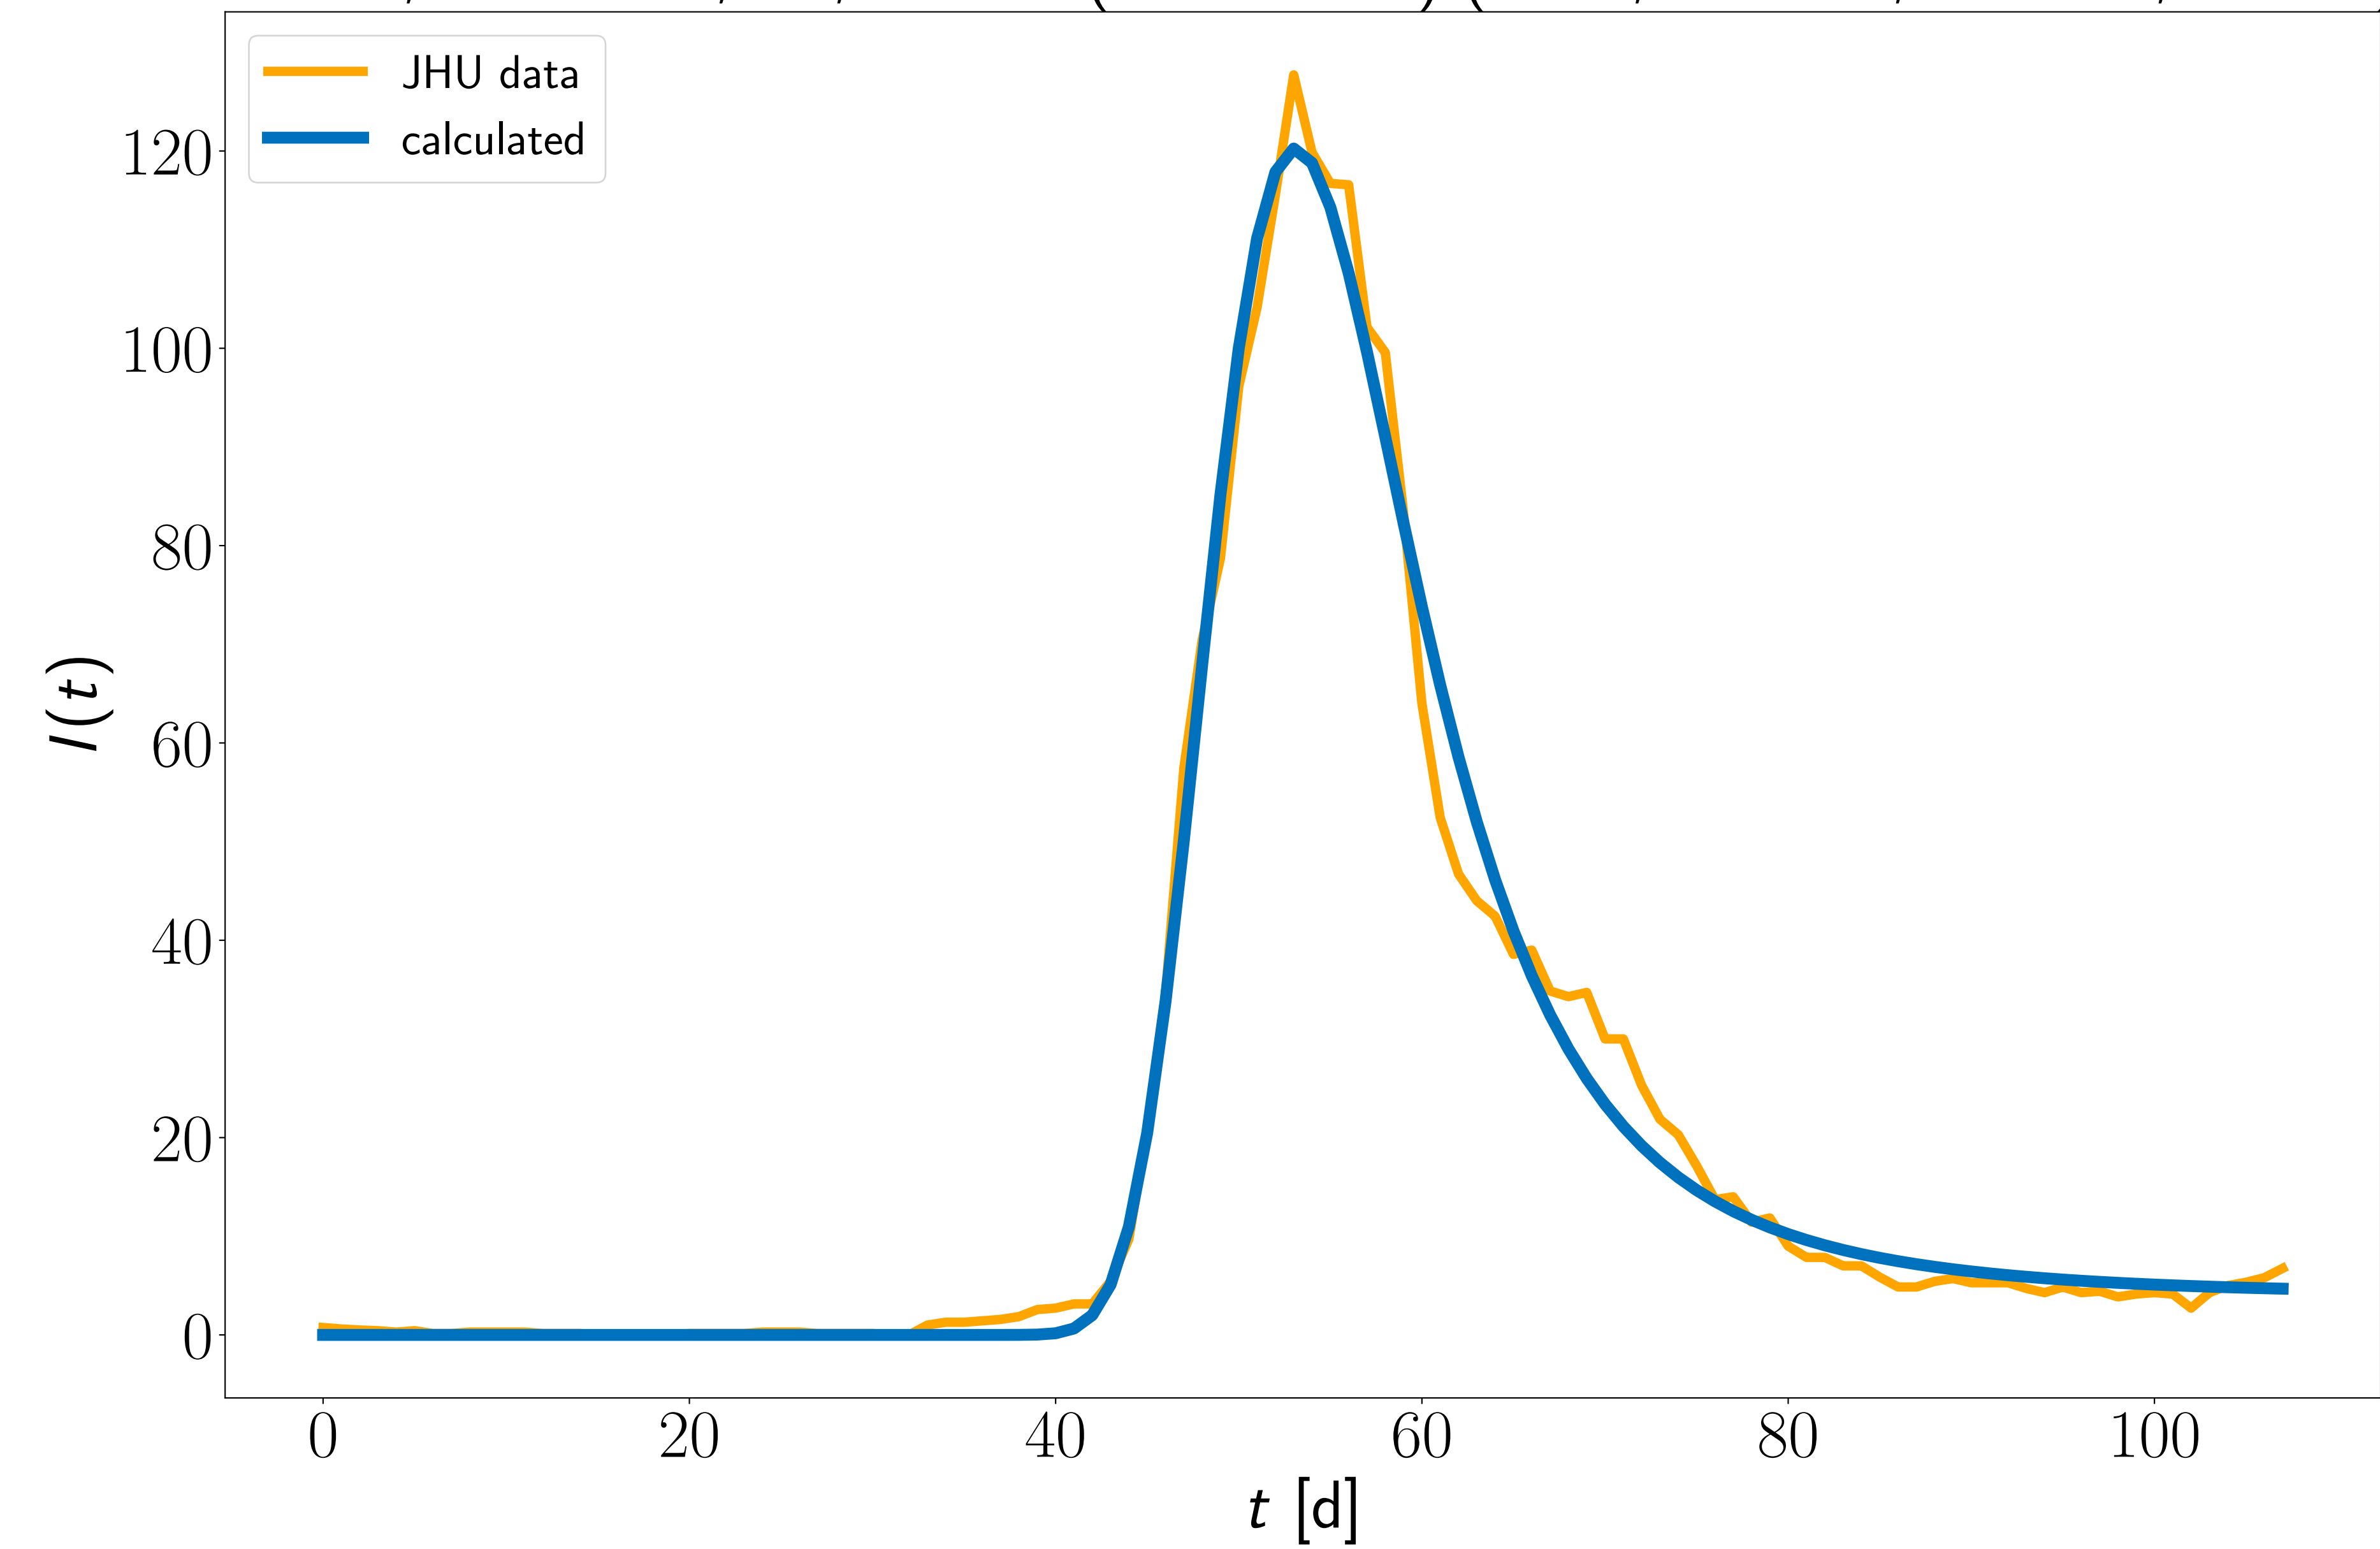

Bergen, New Jersey, US, Bergen ( $R^2 = 0.871$ ) (i: 29.8, a: 0.462, b: 0.057, t: 14.0)

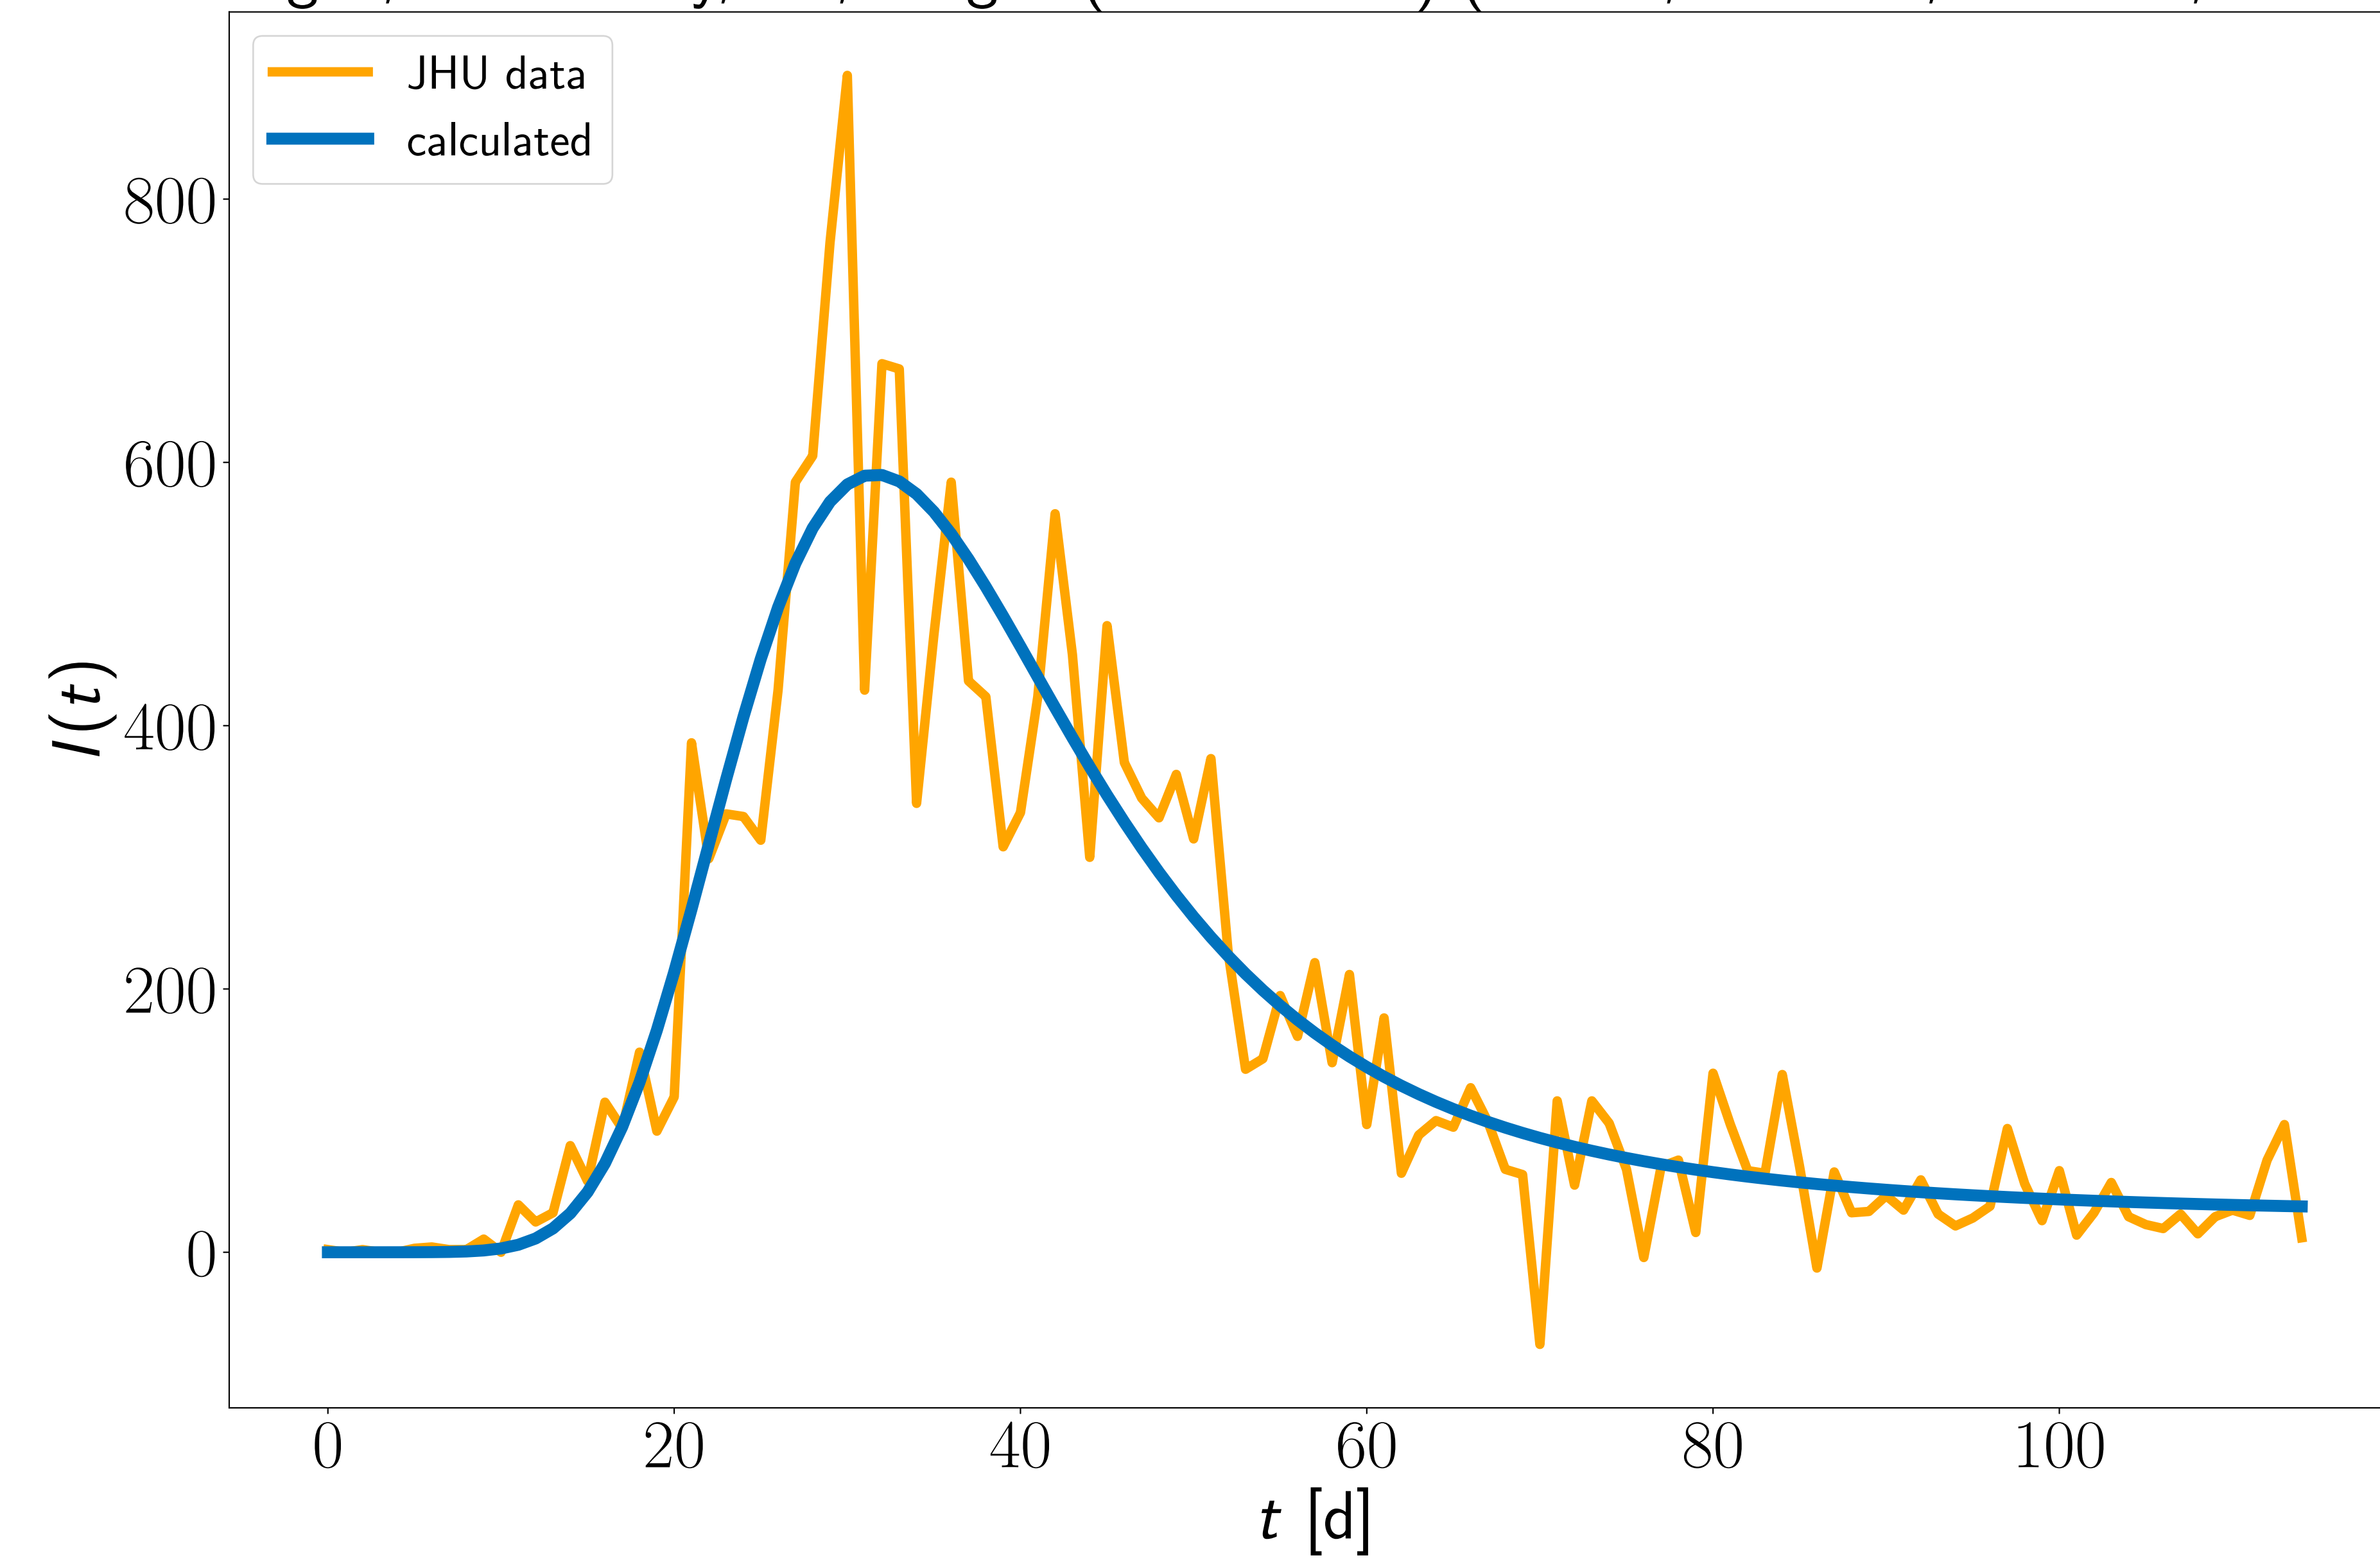

Bergen, New Jersey, US, Bergen ( $R^2 = 0.975$ ) (i: 26.0, a: 0.452, b: 0.054, t: 13.1)

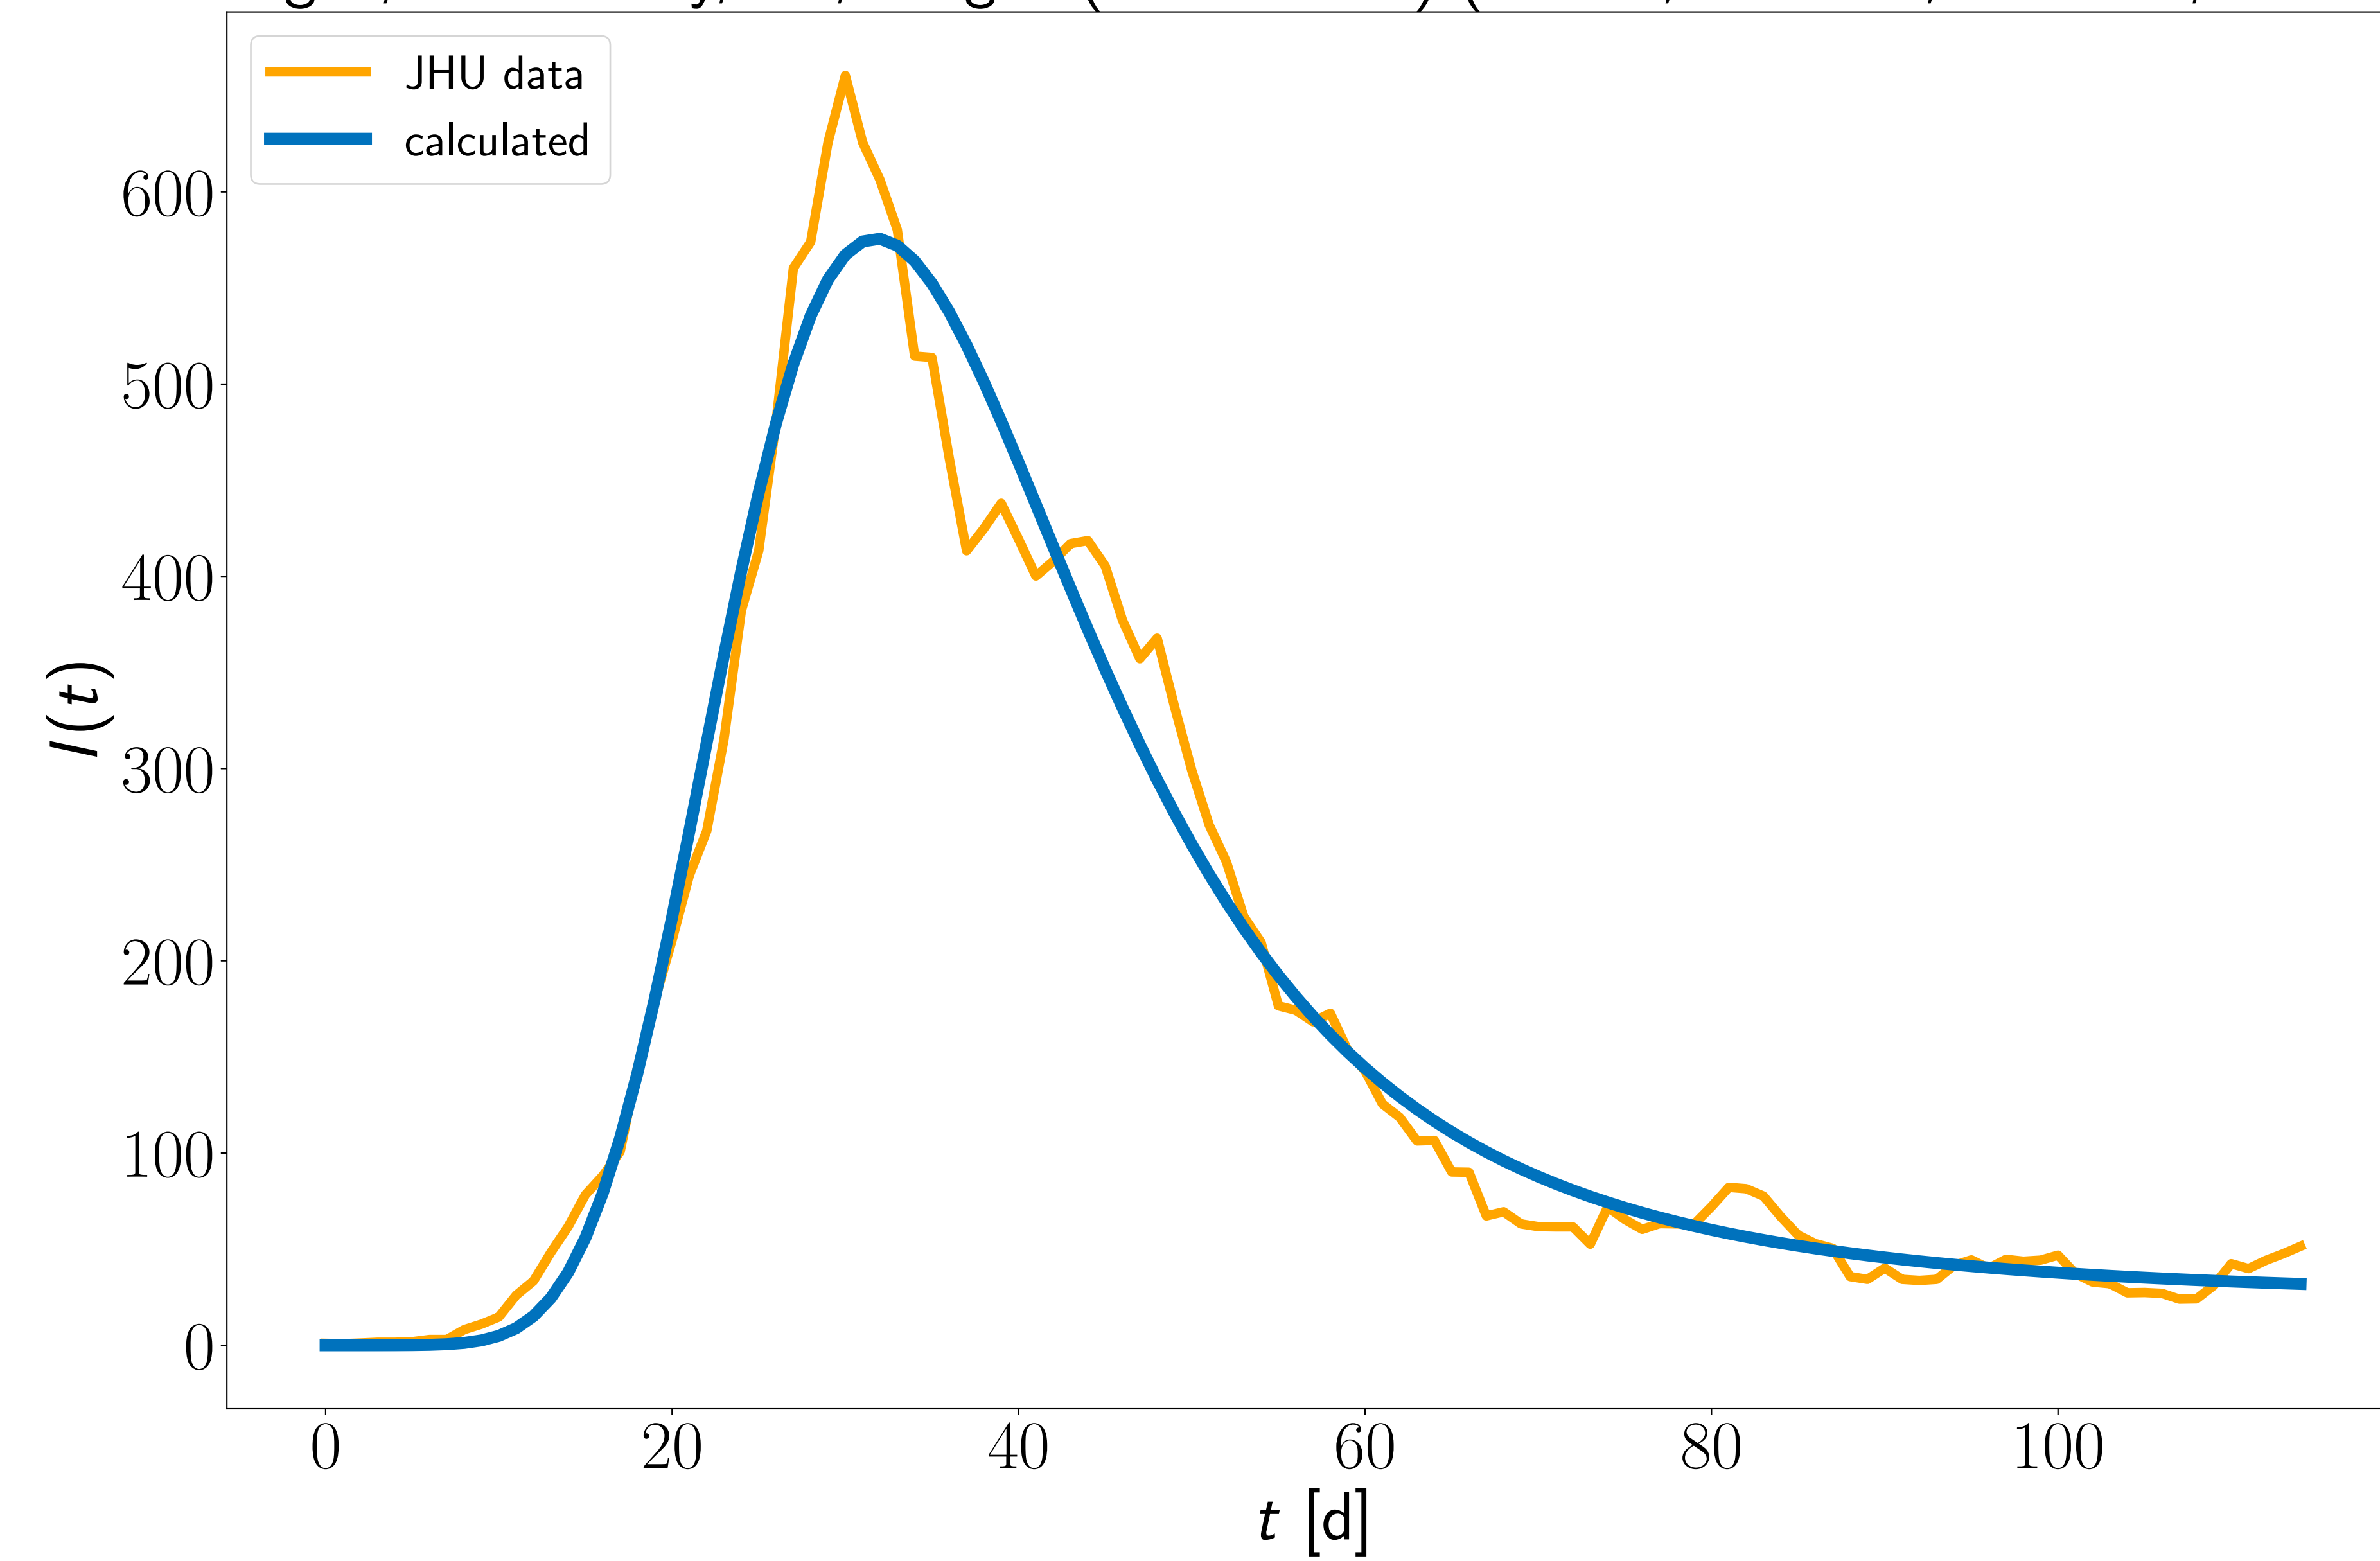

Camden, New Jersey, US, Camden ( $R^2 = 0.792$ ) (i: 0.9, a: 0.302, b: 0.022, t: 1.0)

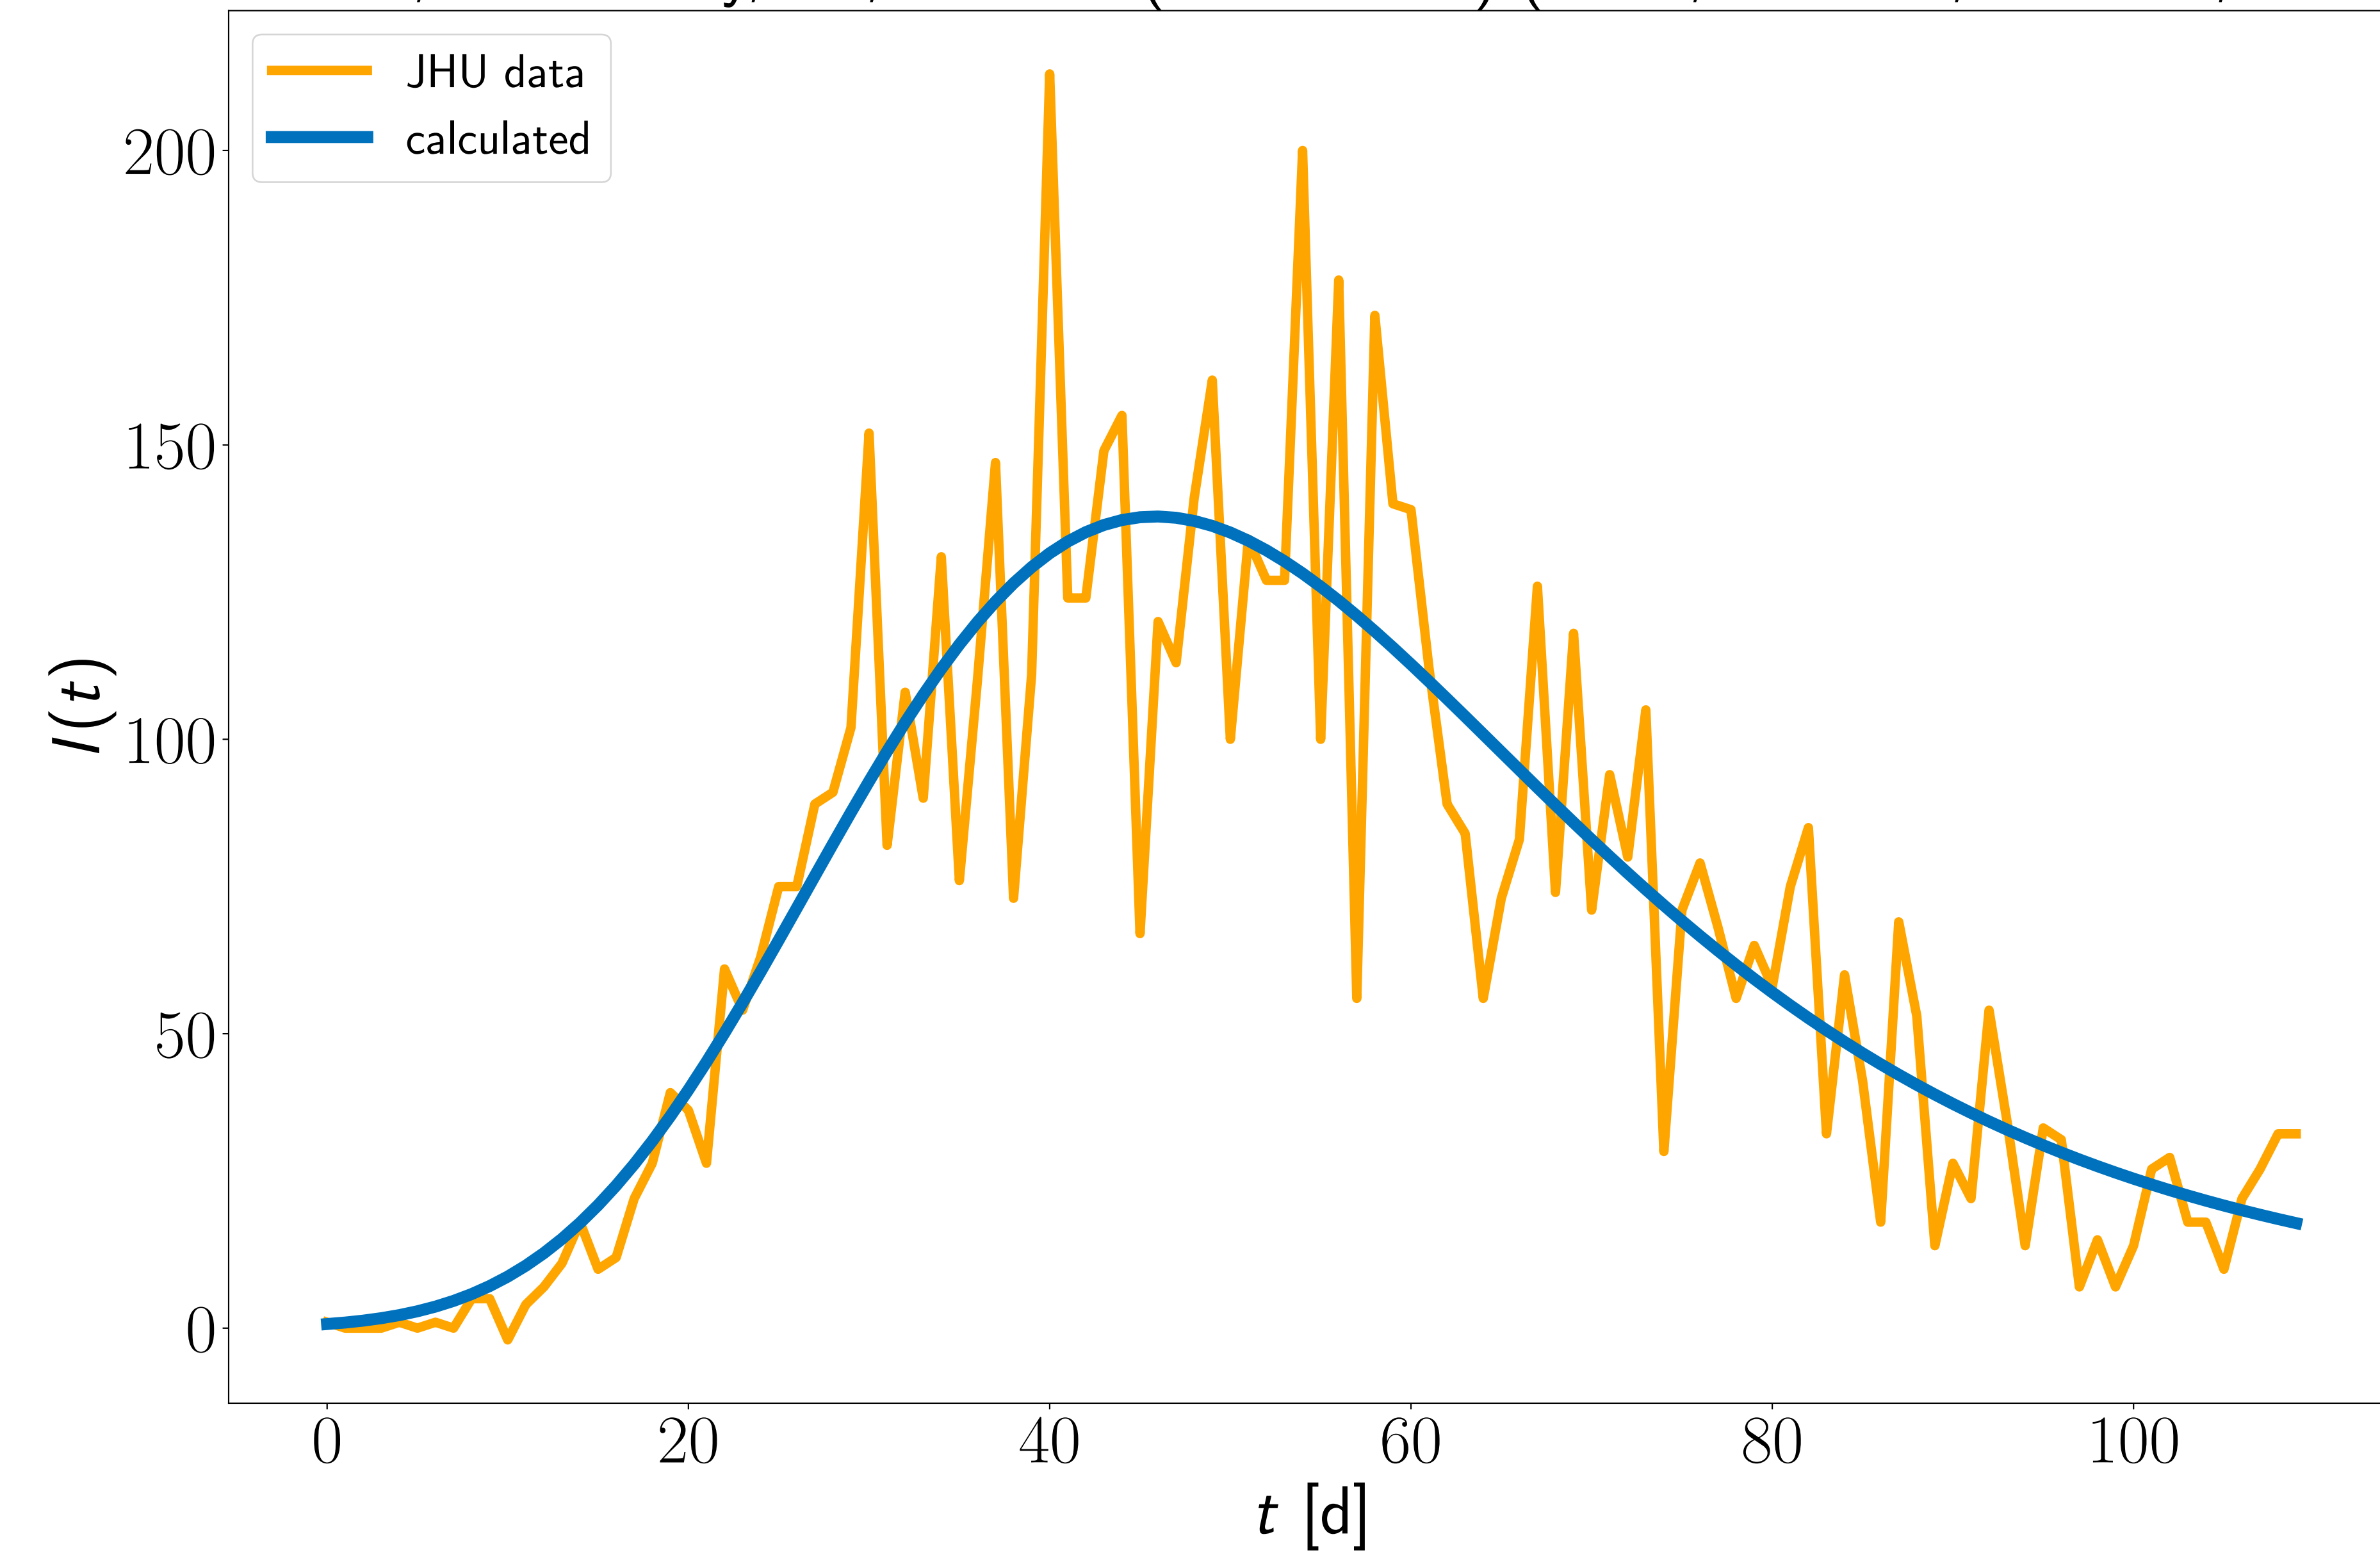

Camden, New Jersey, US, Camden ( $R^2 = 0.974$ ) (i: 1.0, a: 0.3, b: 0.022, t: 1.0)

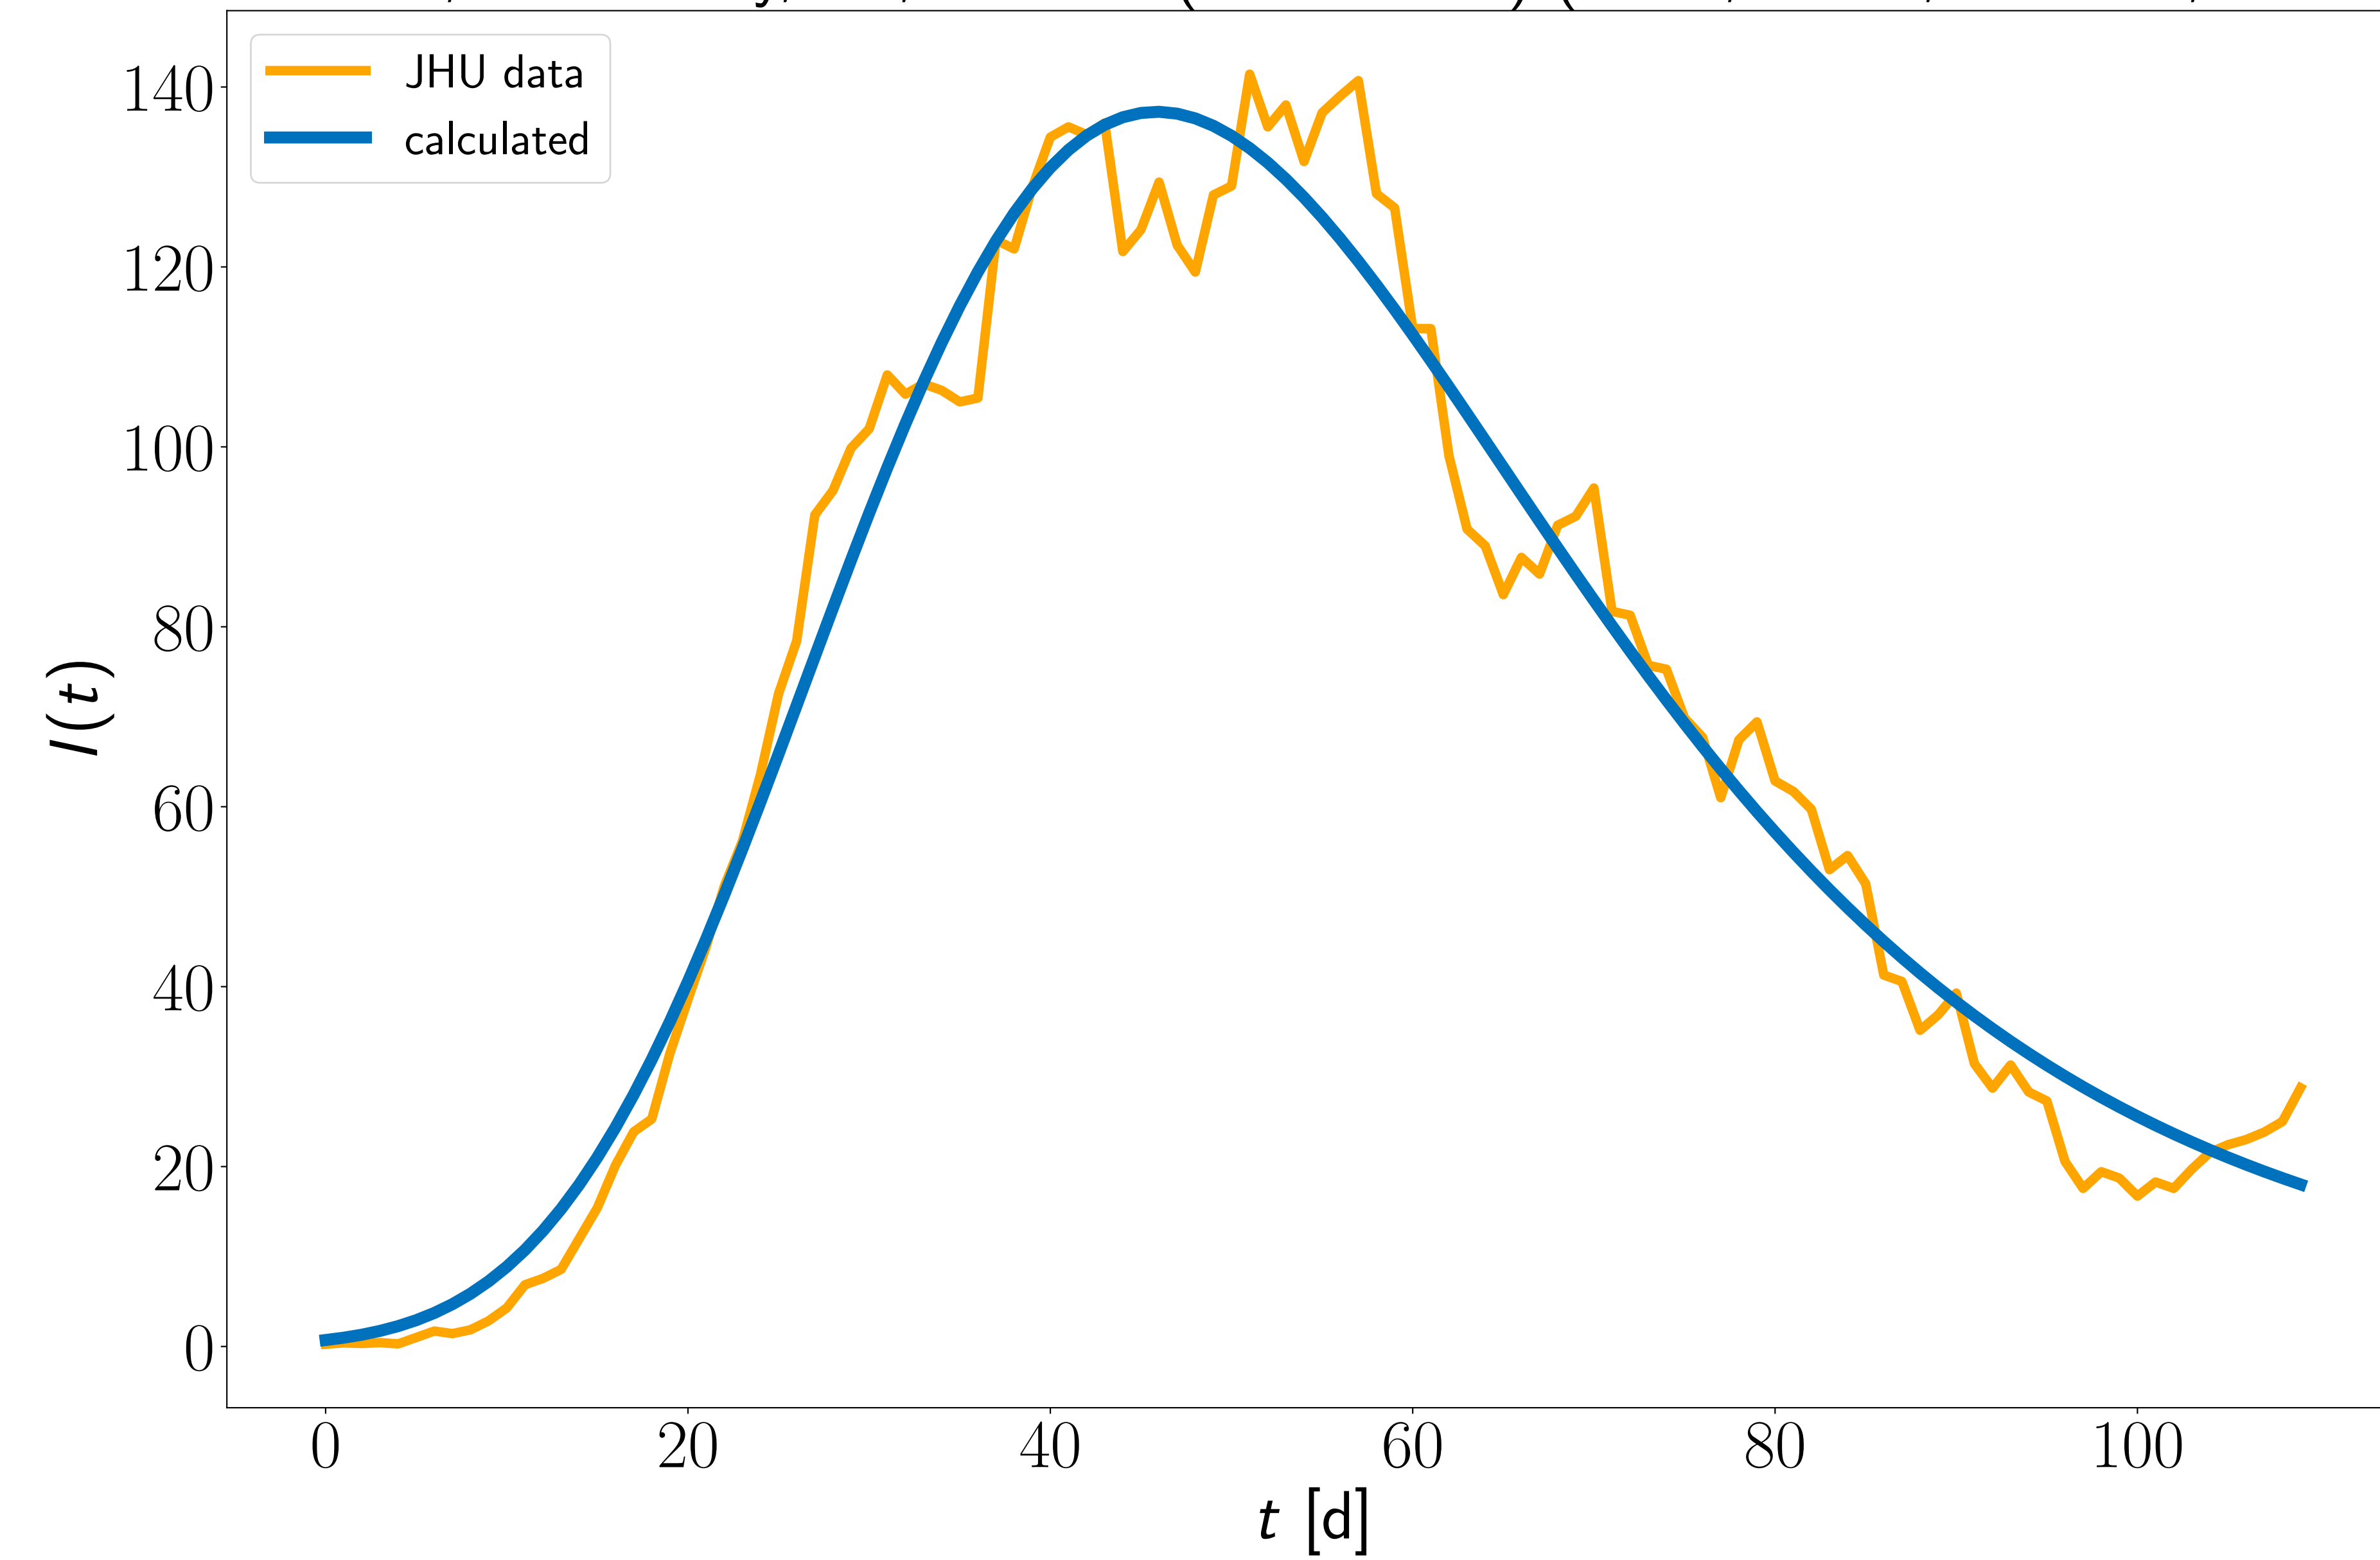

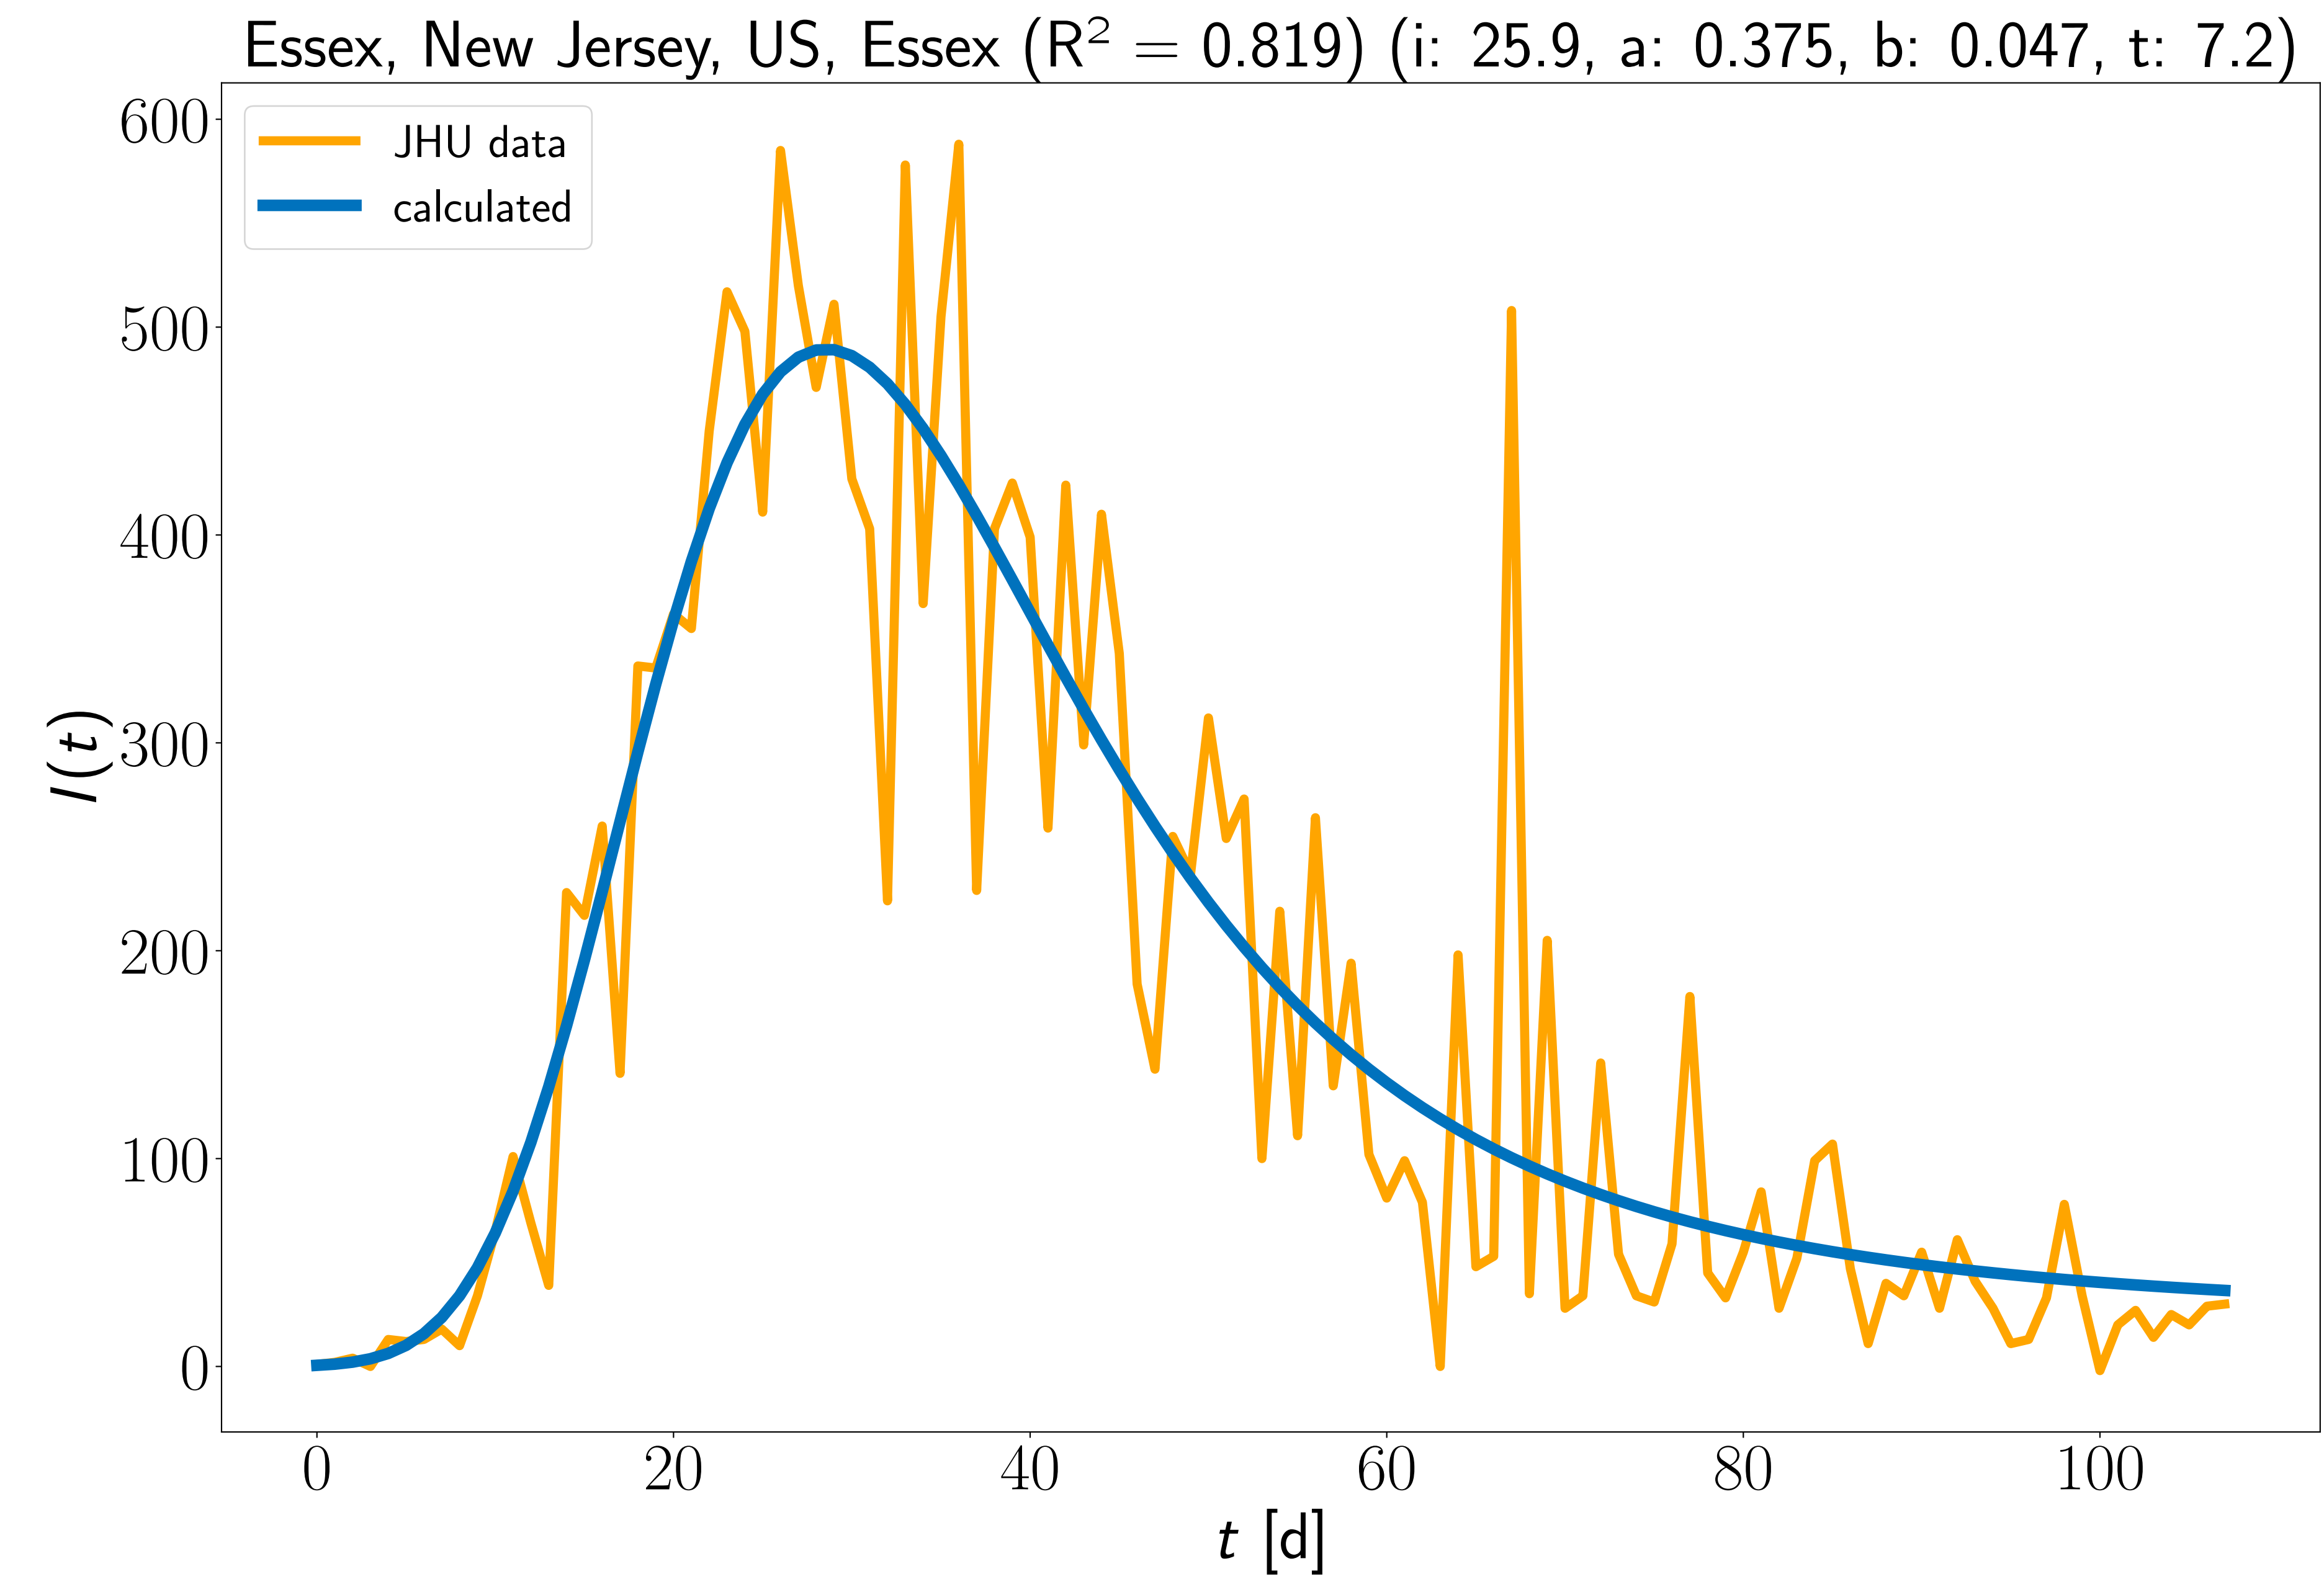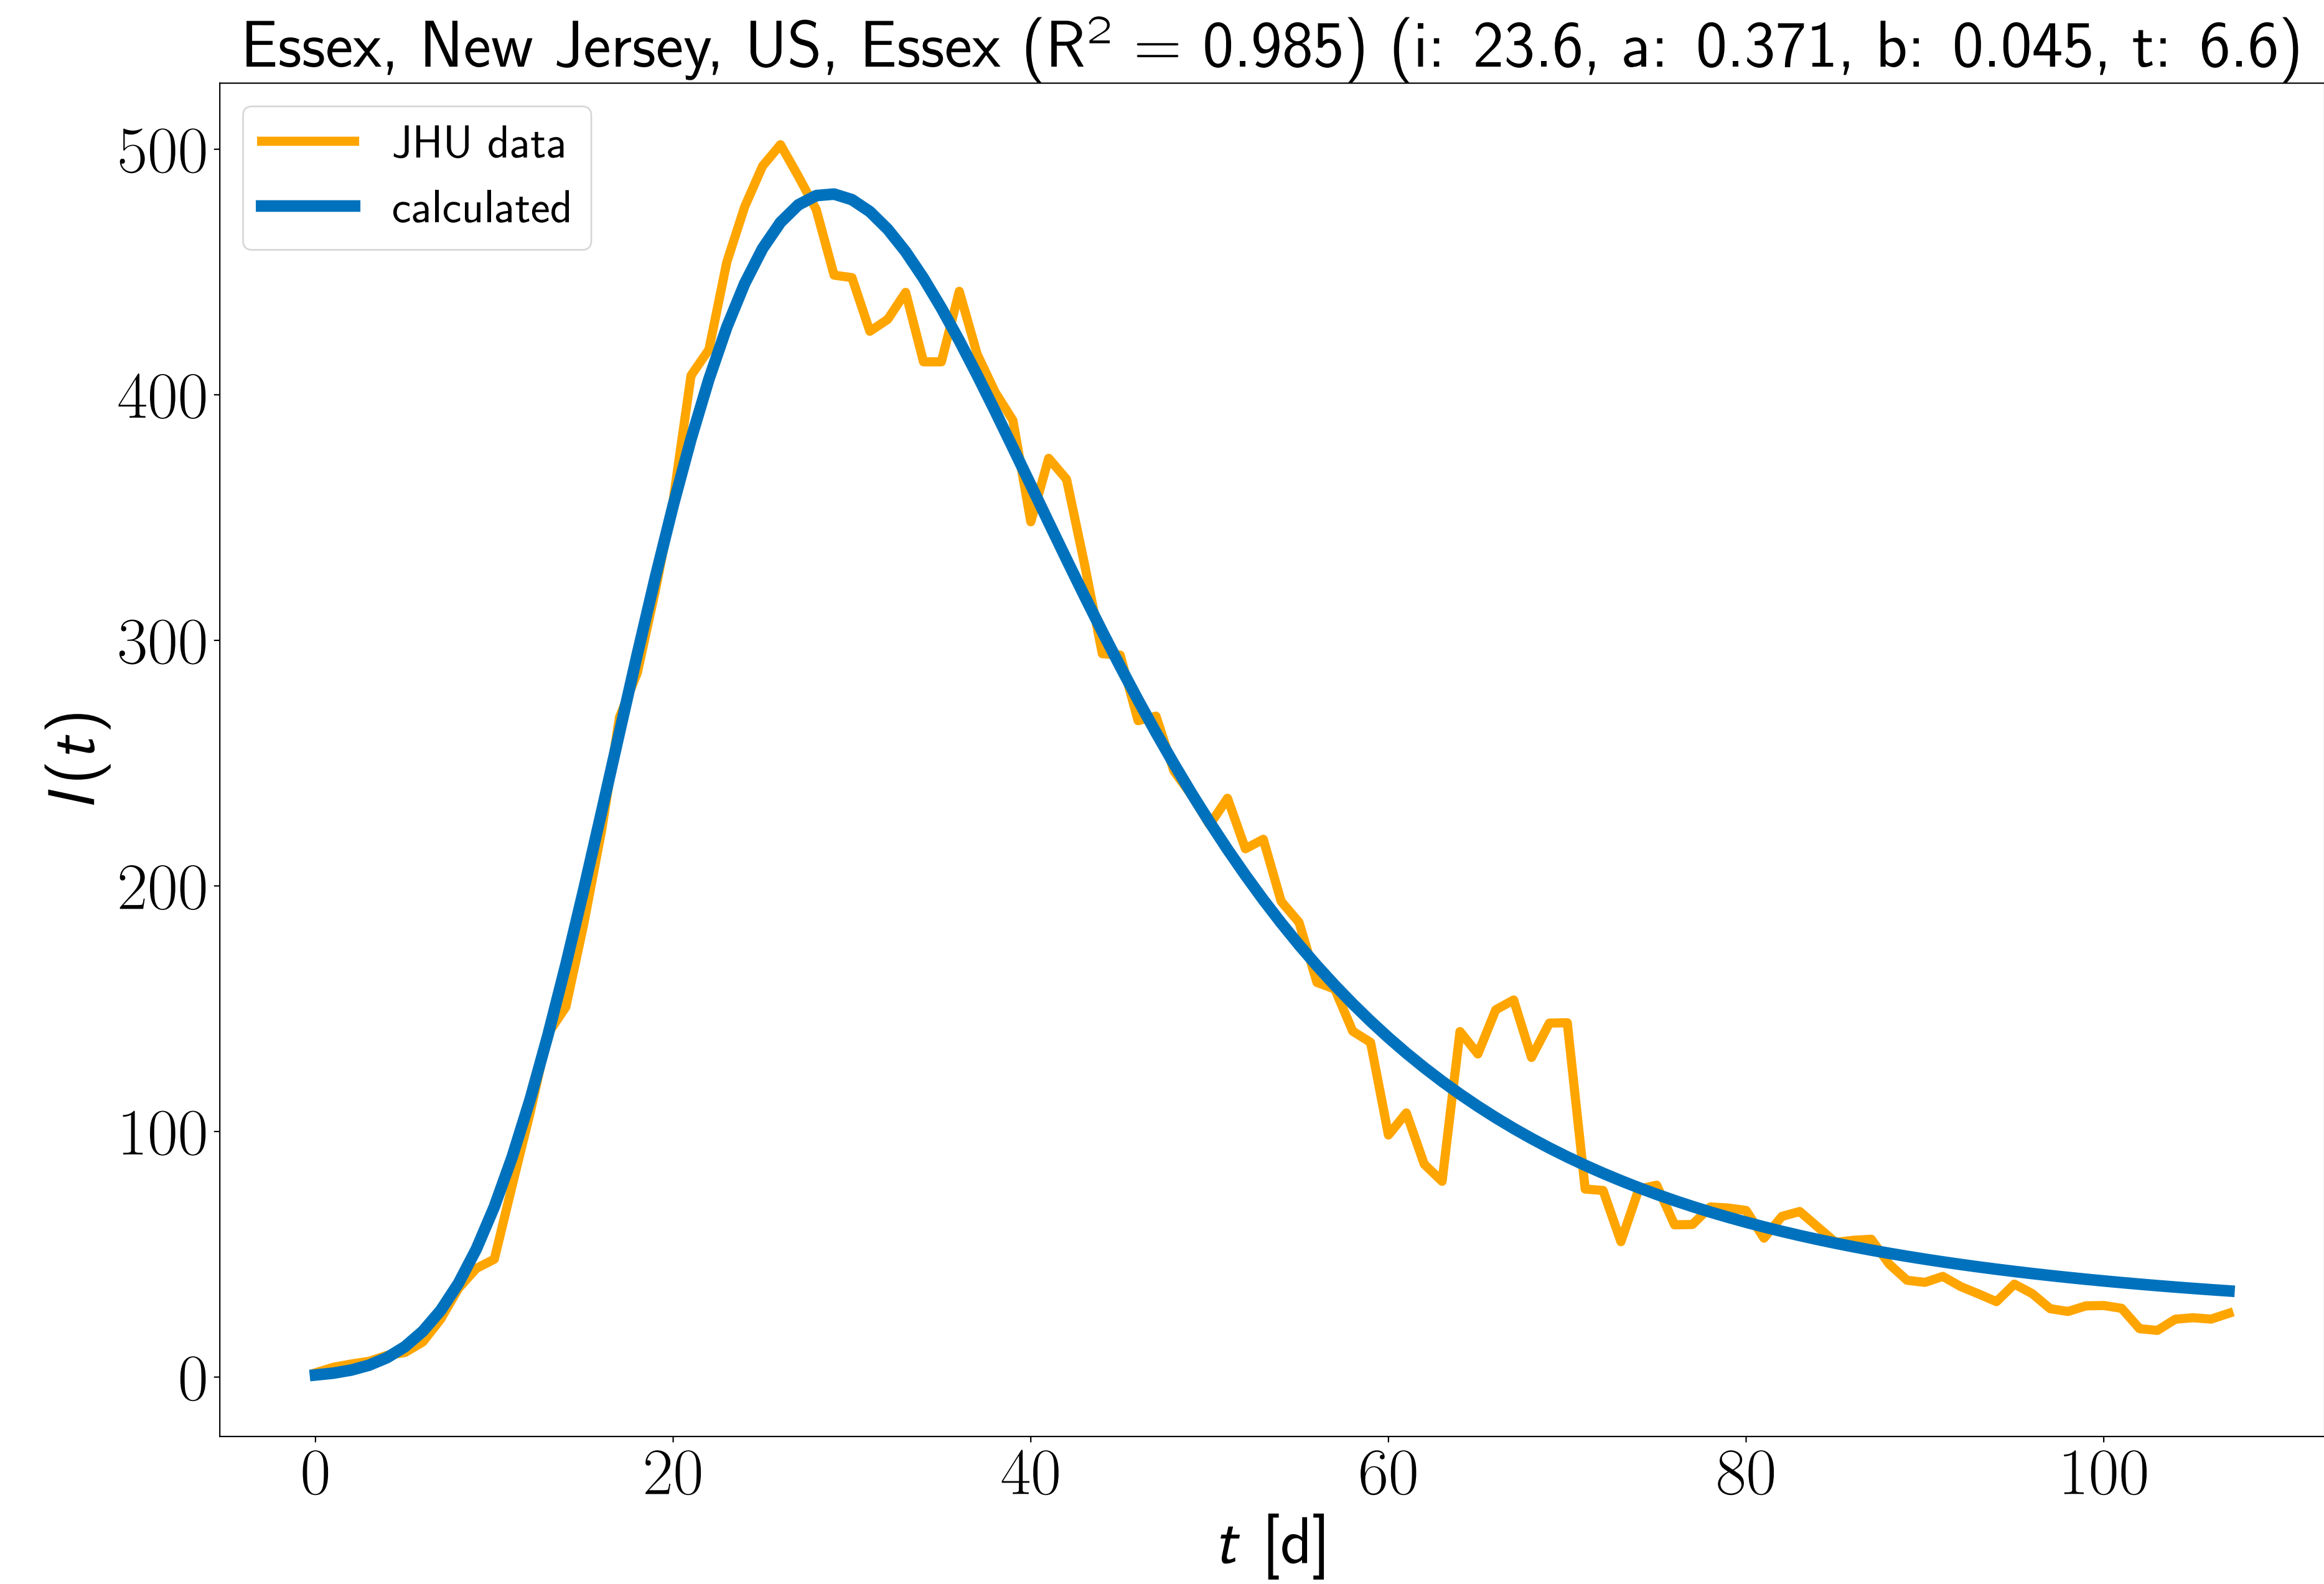

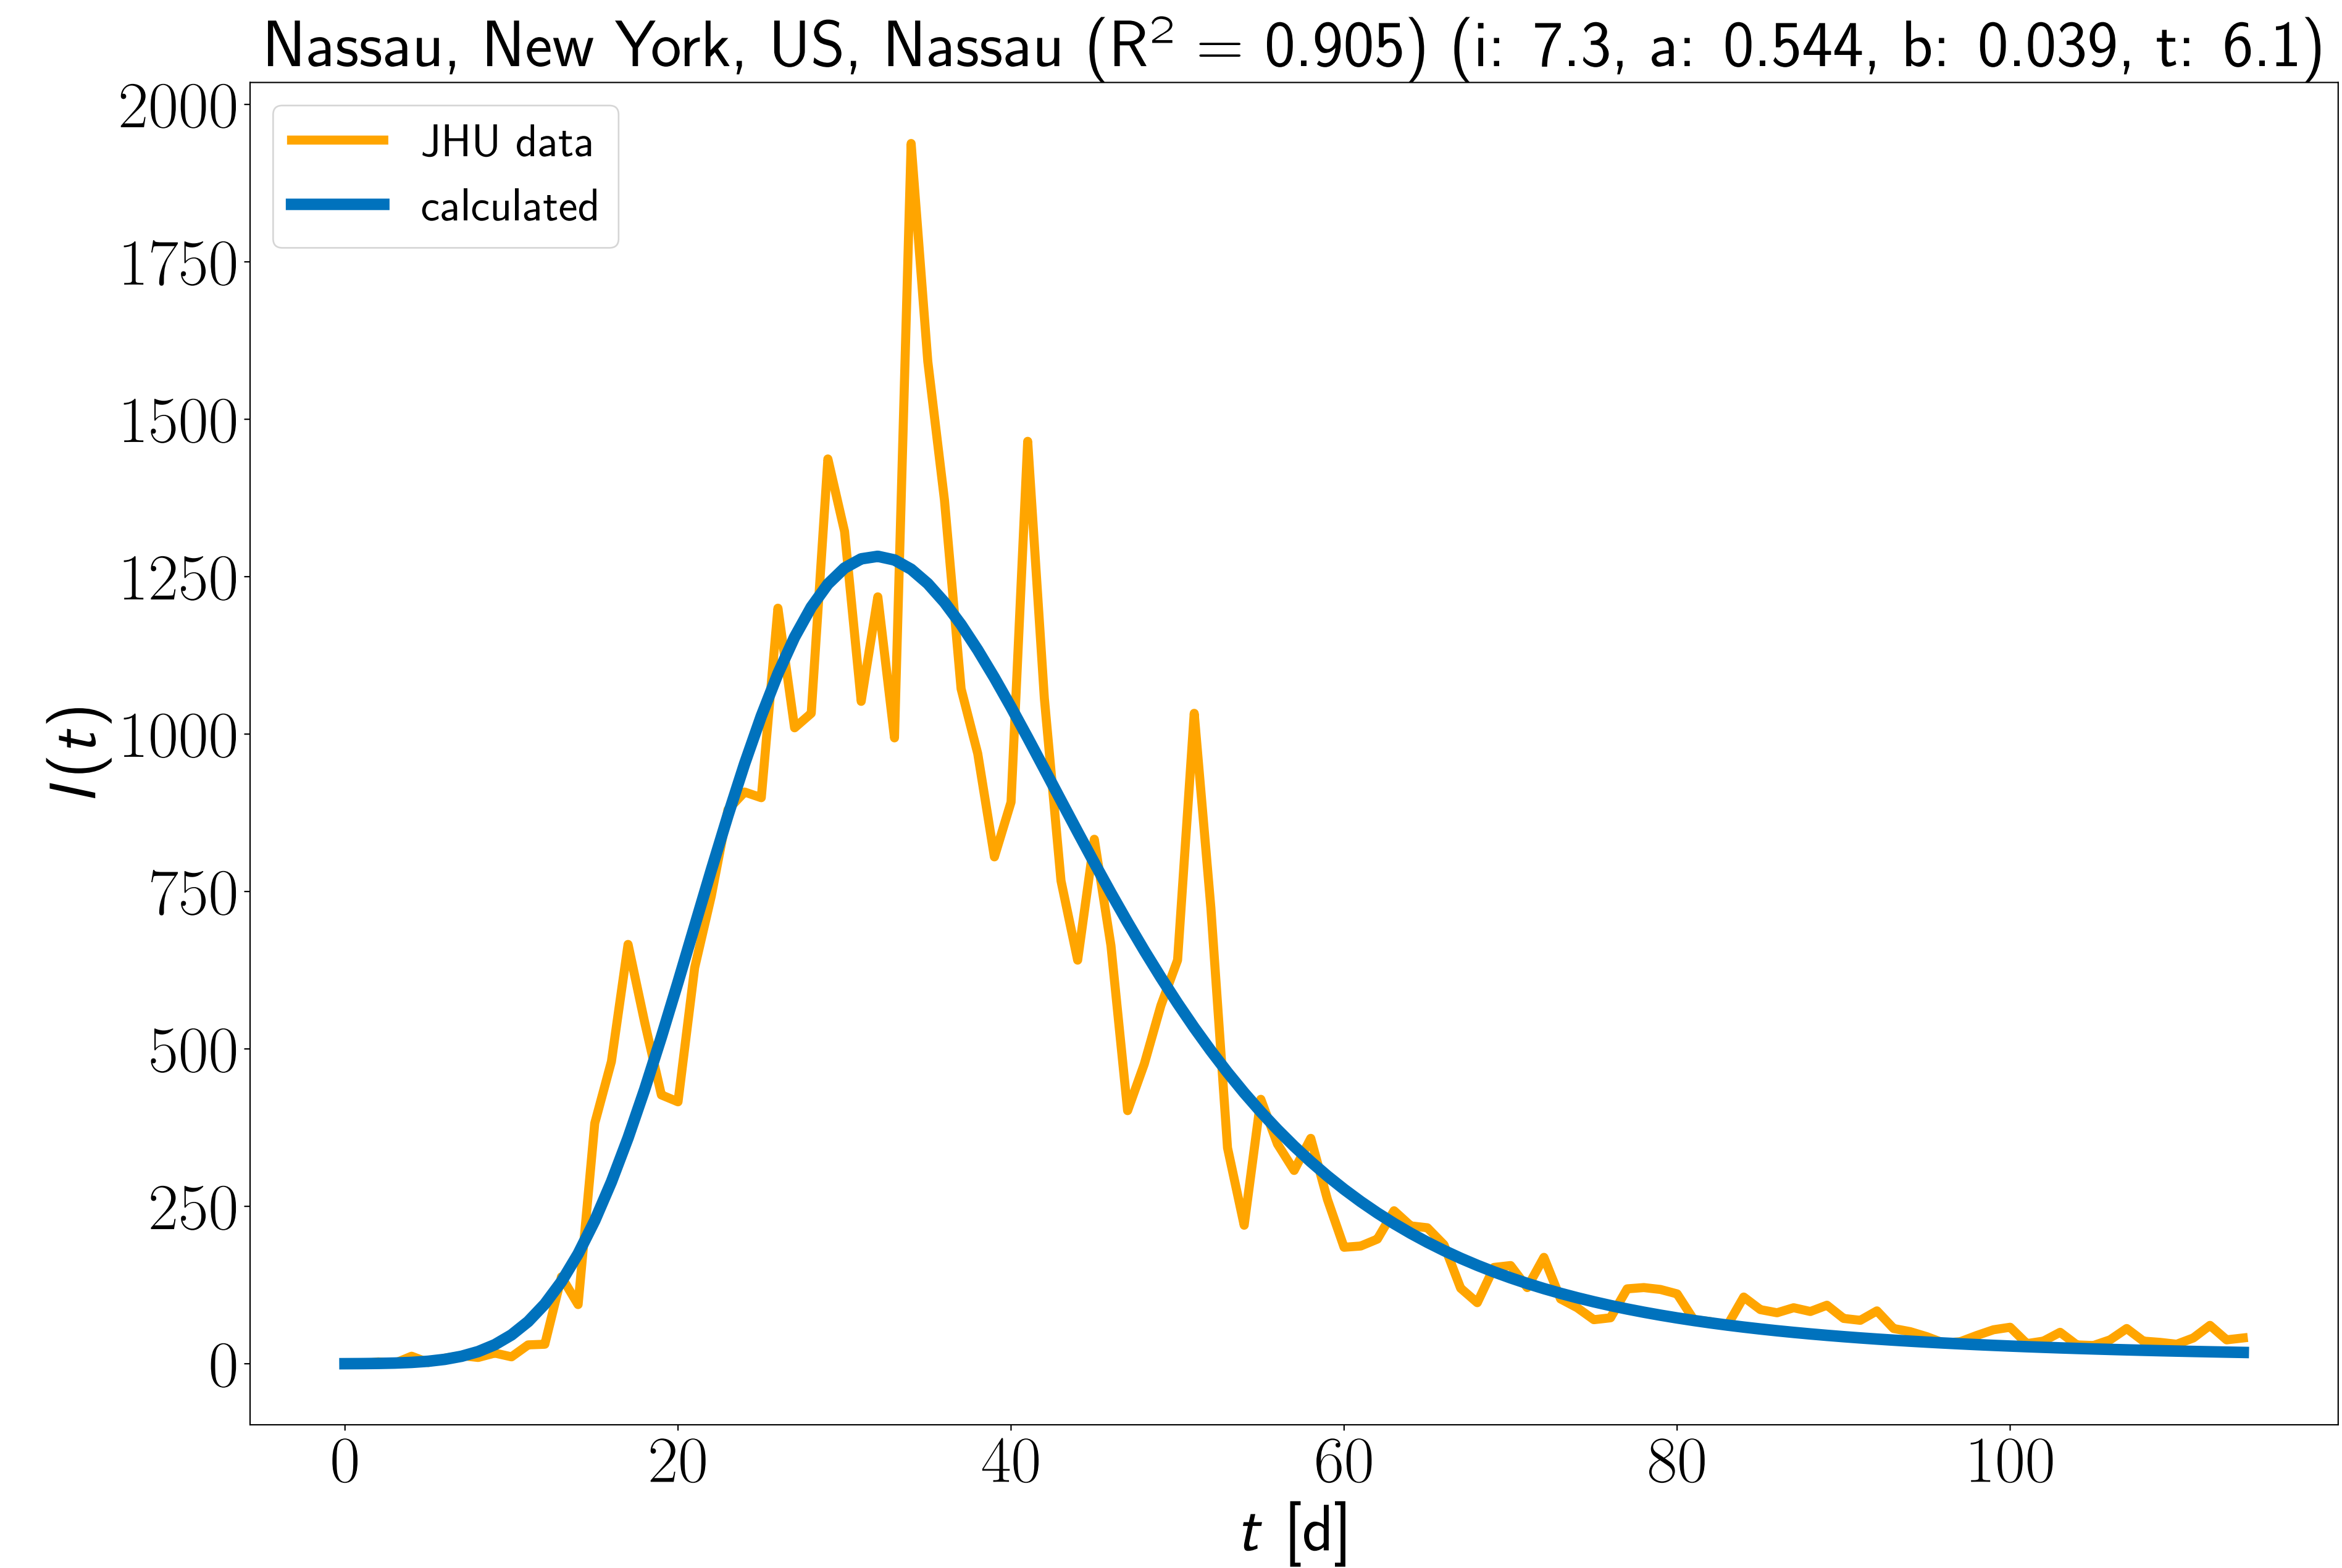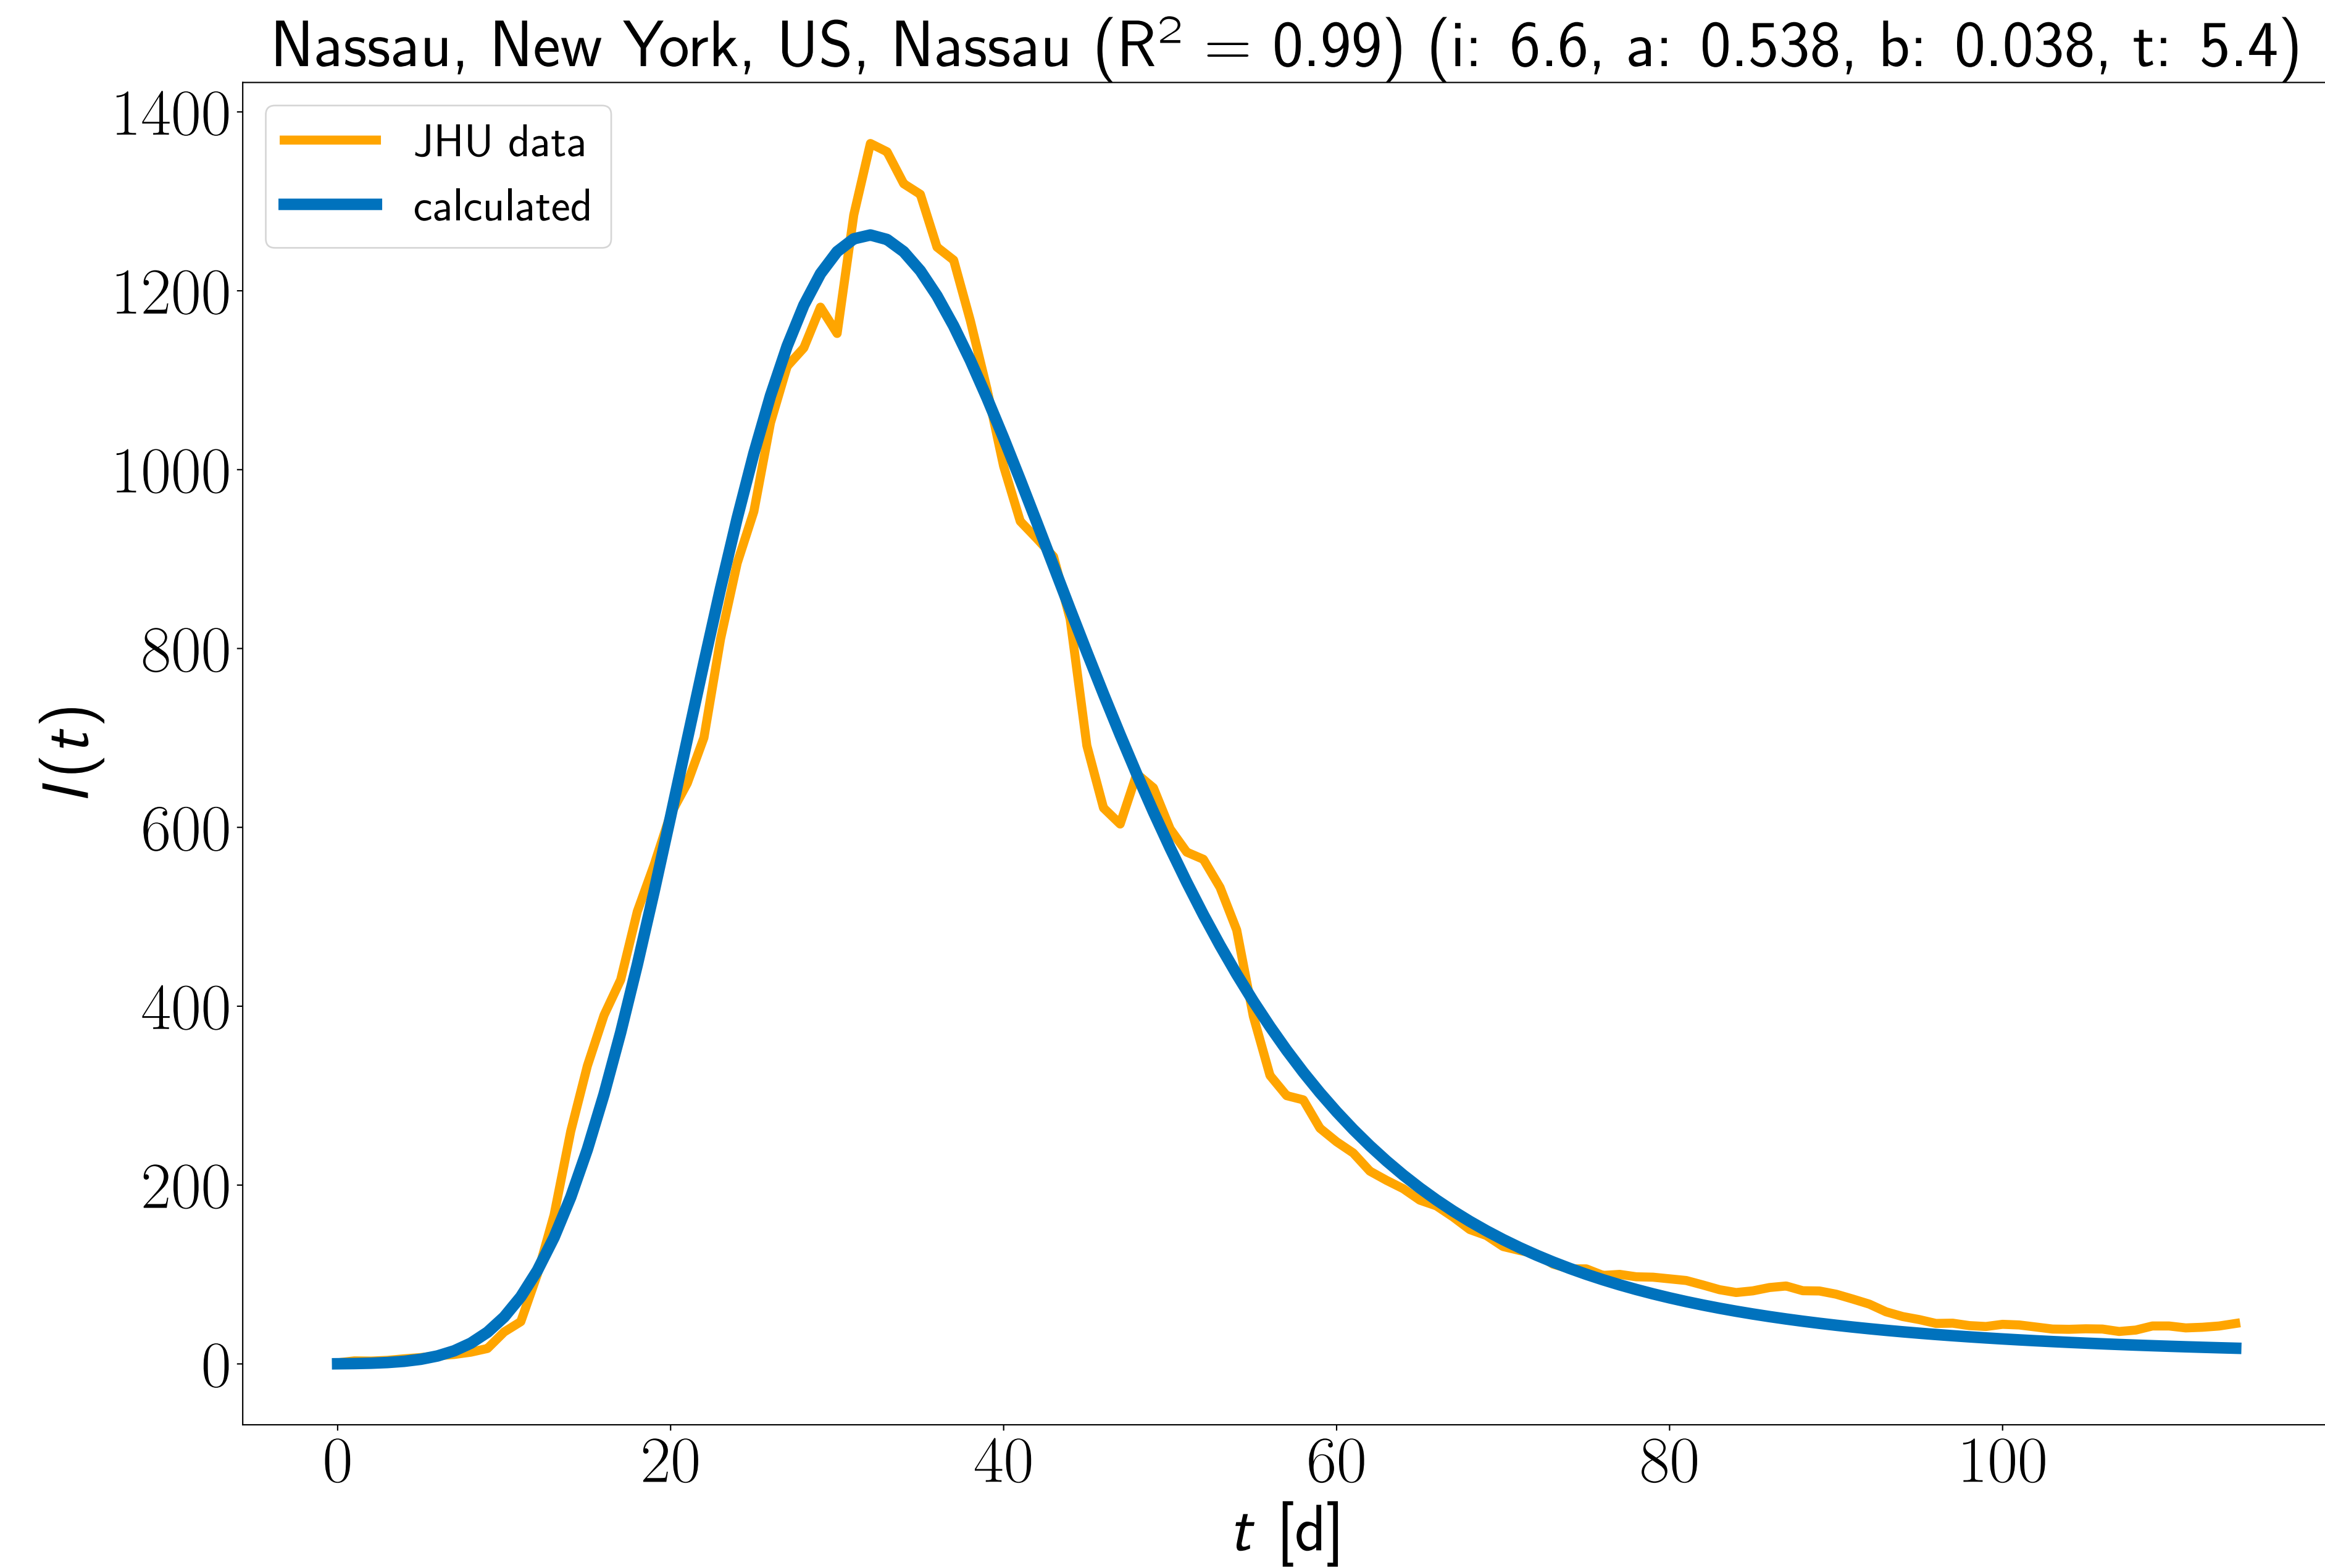

New York City, New York, US, New York ( $R^2 = 0.908$ ) (i: 153.2, a: 0.368, b: 0.038, t: 9.2)

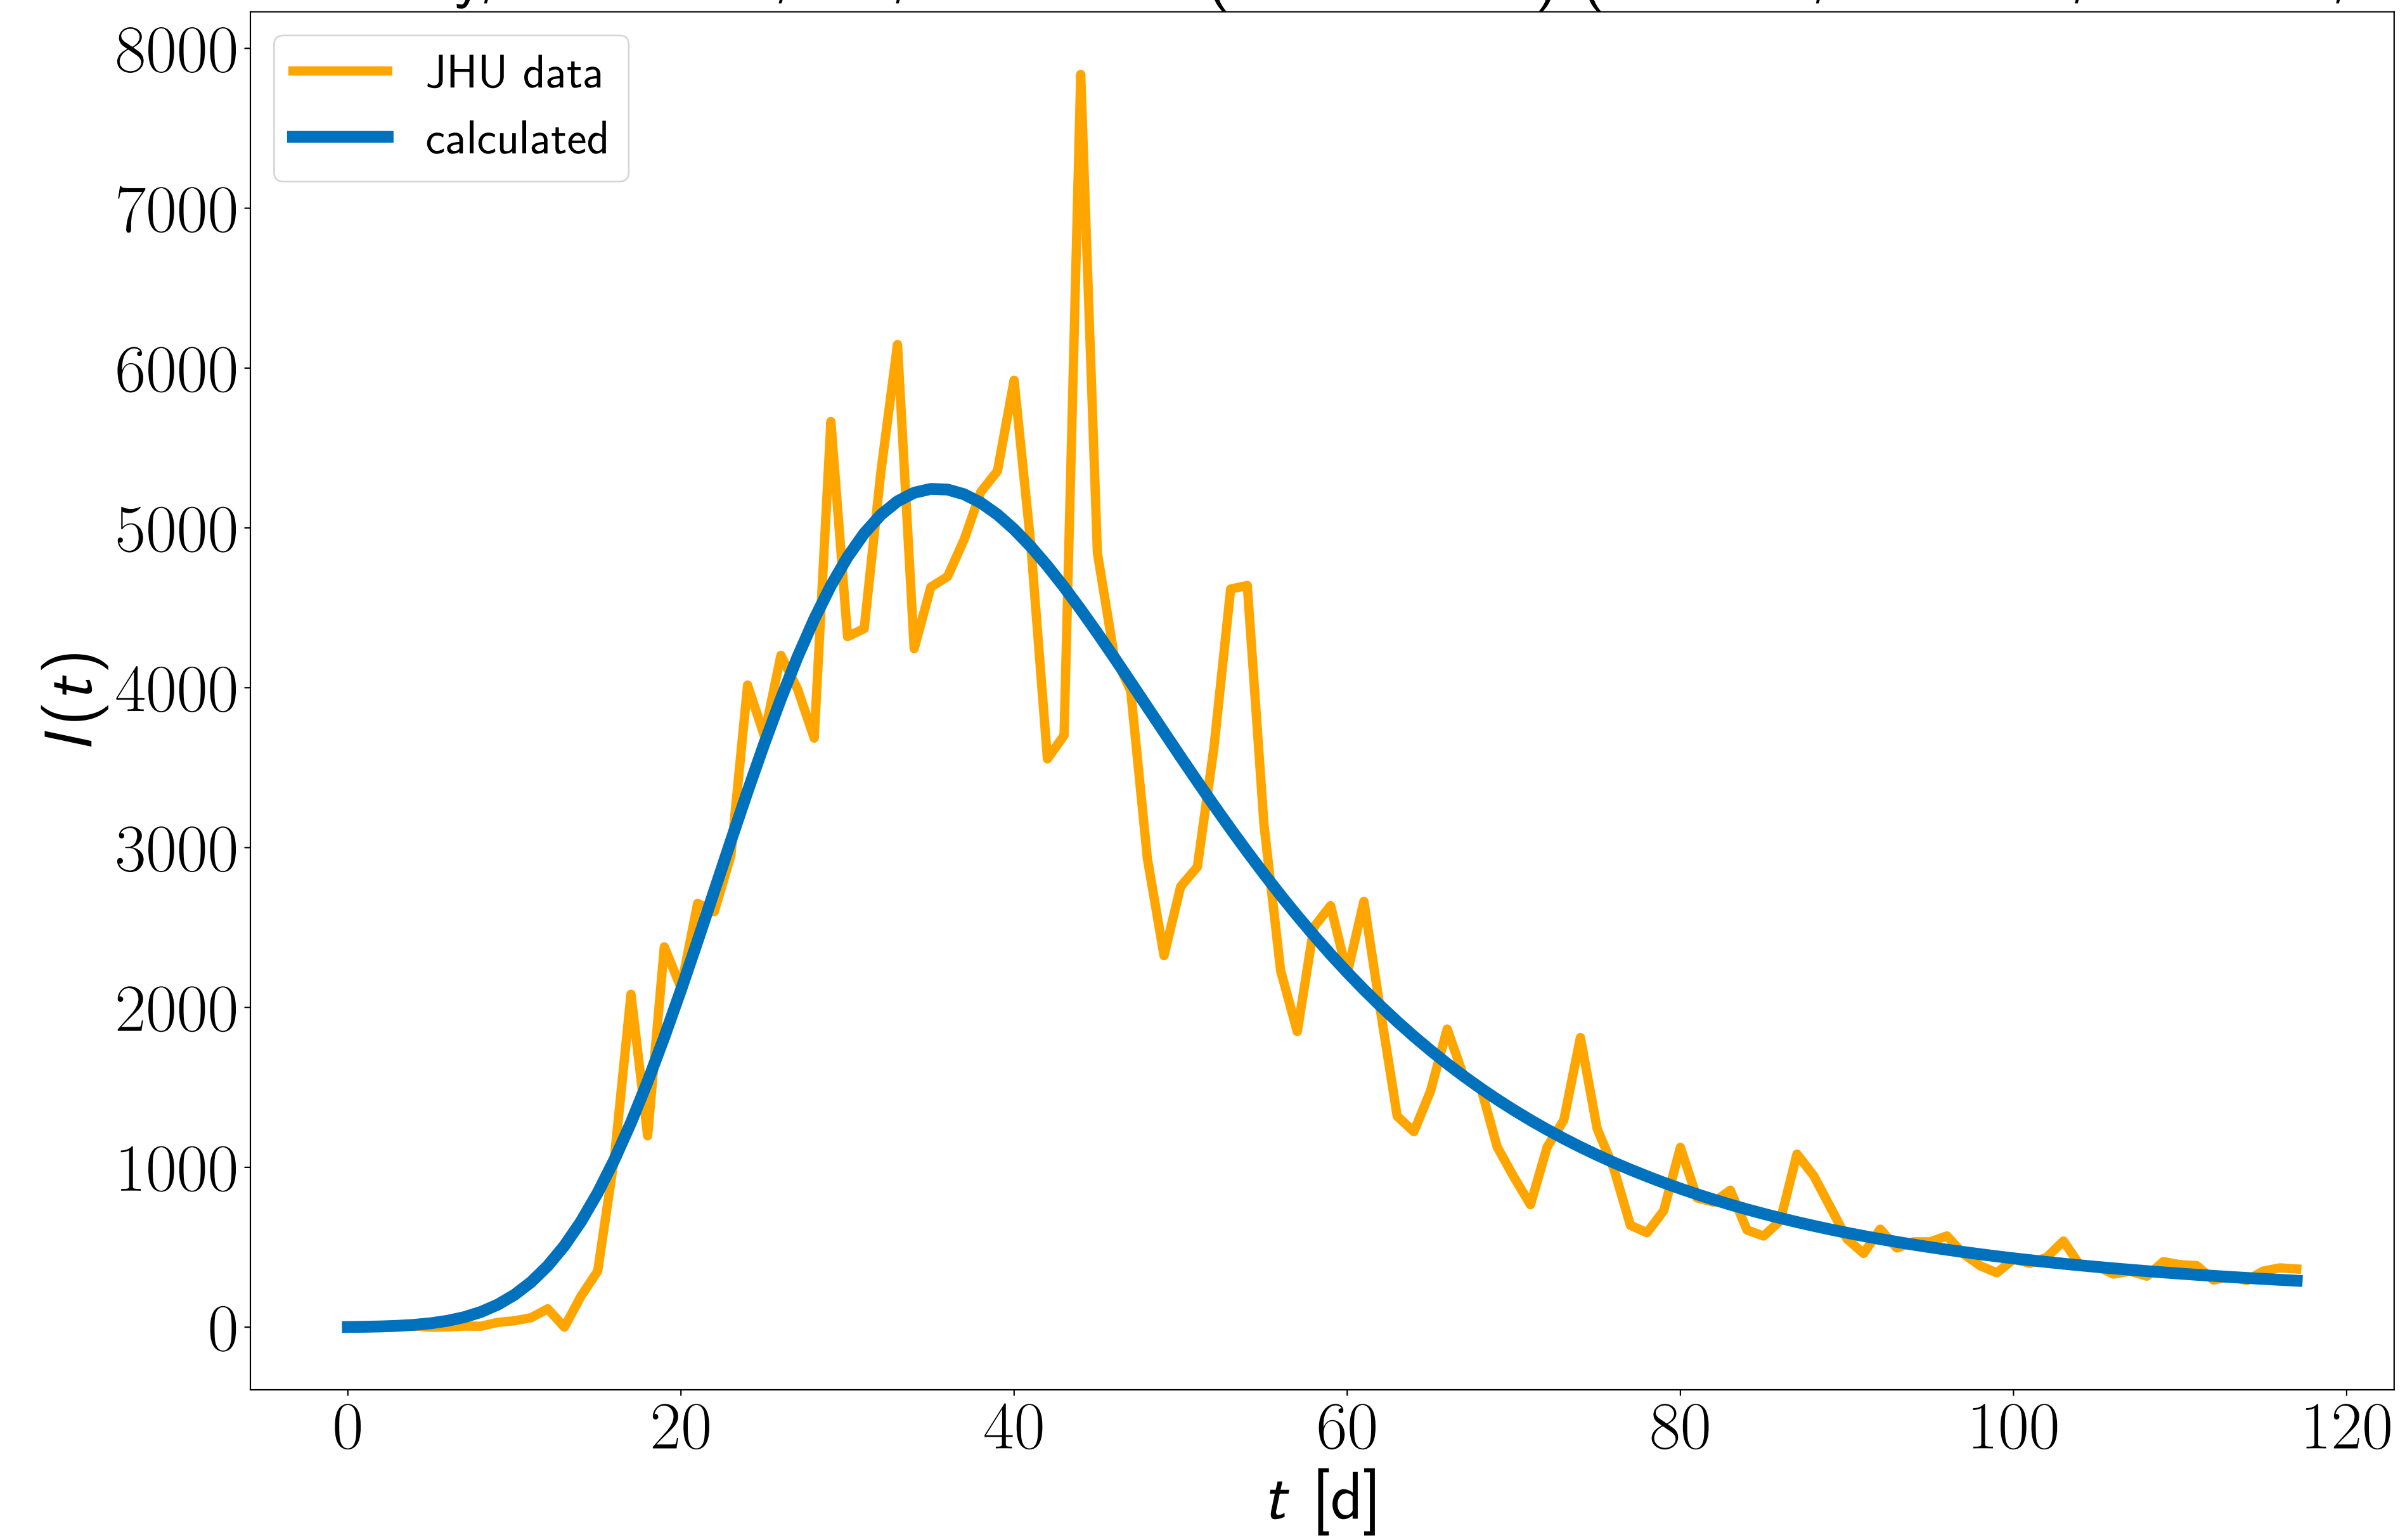

New York City, New York, US, New York ( $R^2 = 0.992$ ) (i: 143.1, a: 0.366, b: 0.037, t: 8.8)

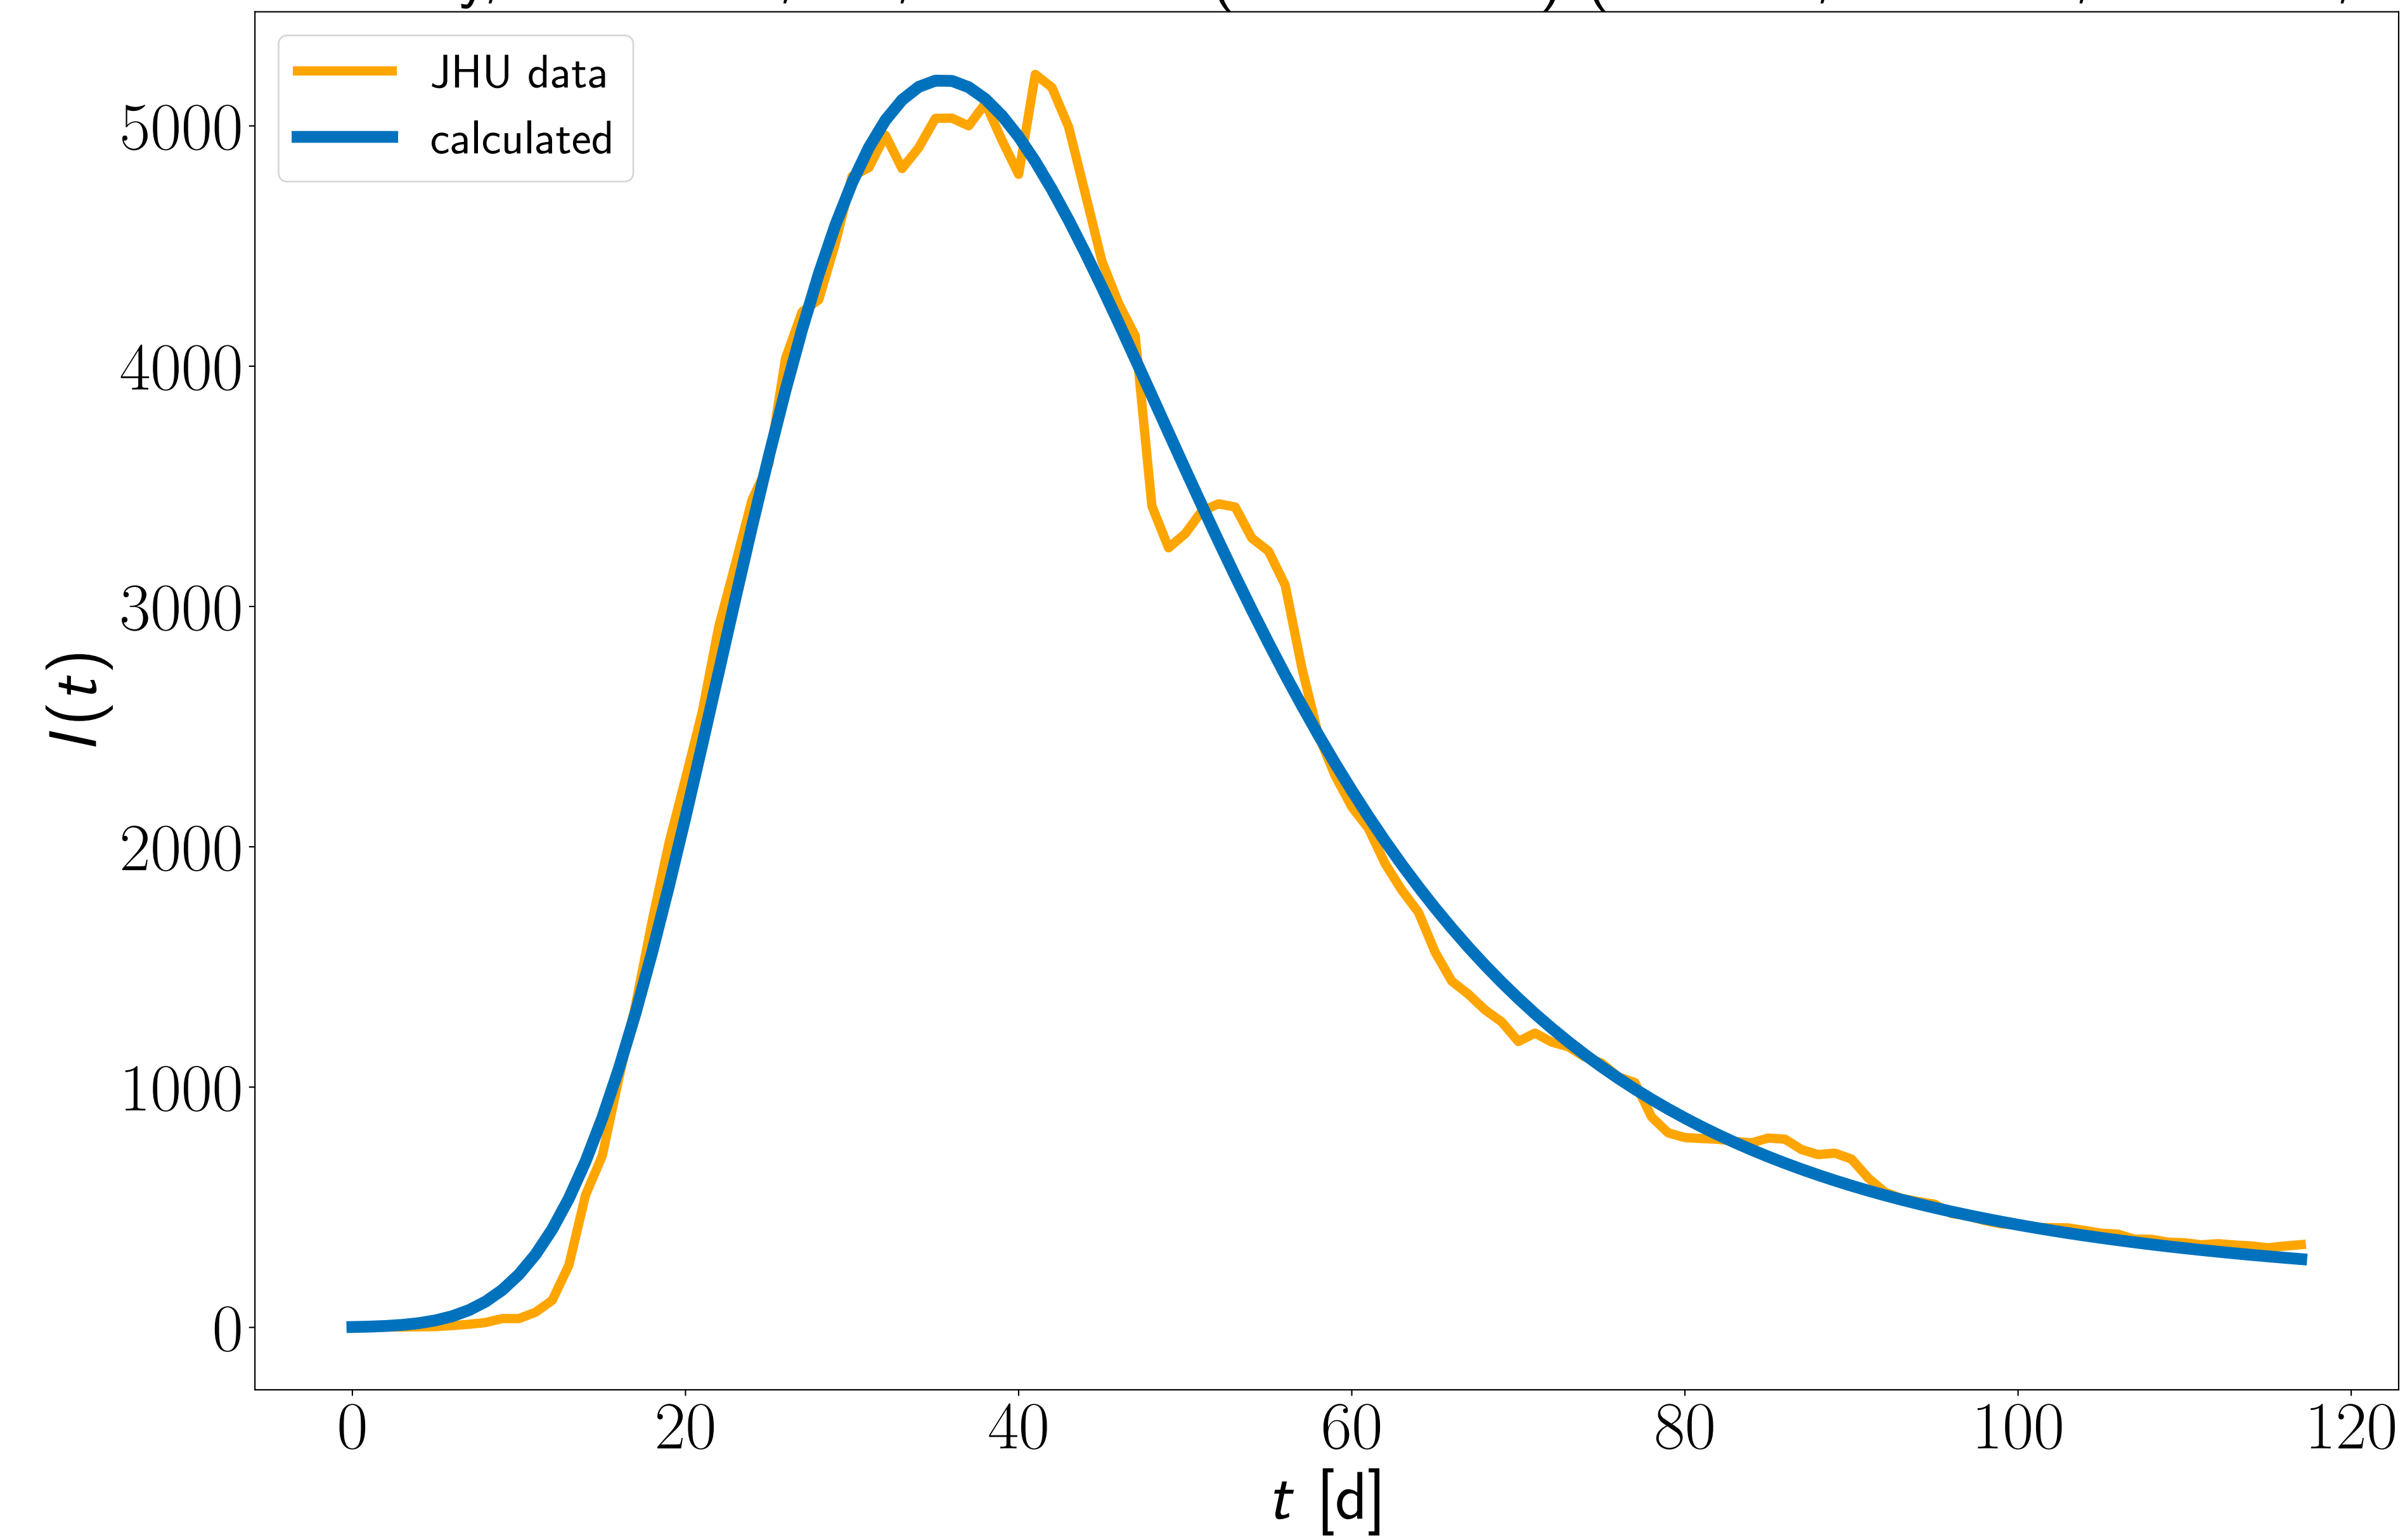

Suffolk, New York, US, Suffolk ( $R^2 = 0.796$ ) (i: 45.6, a: 0.455, b: 0.051, t: 9.3)

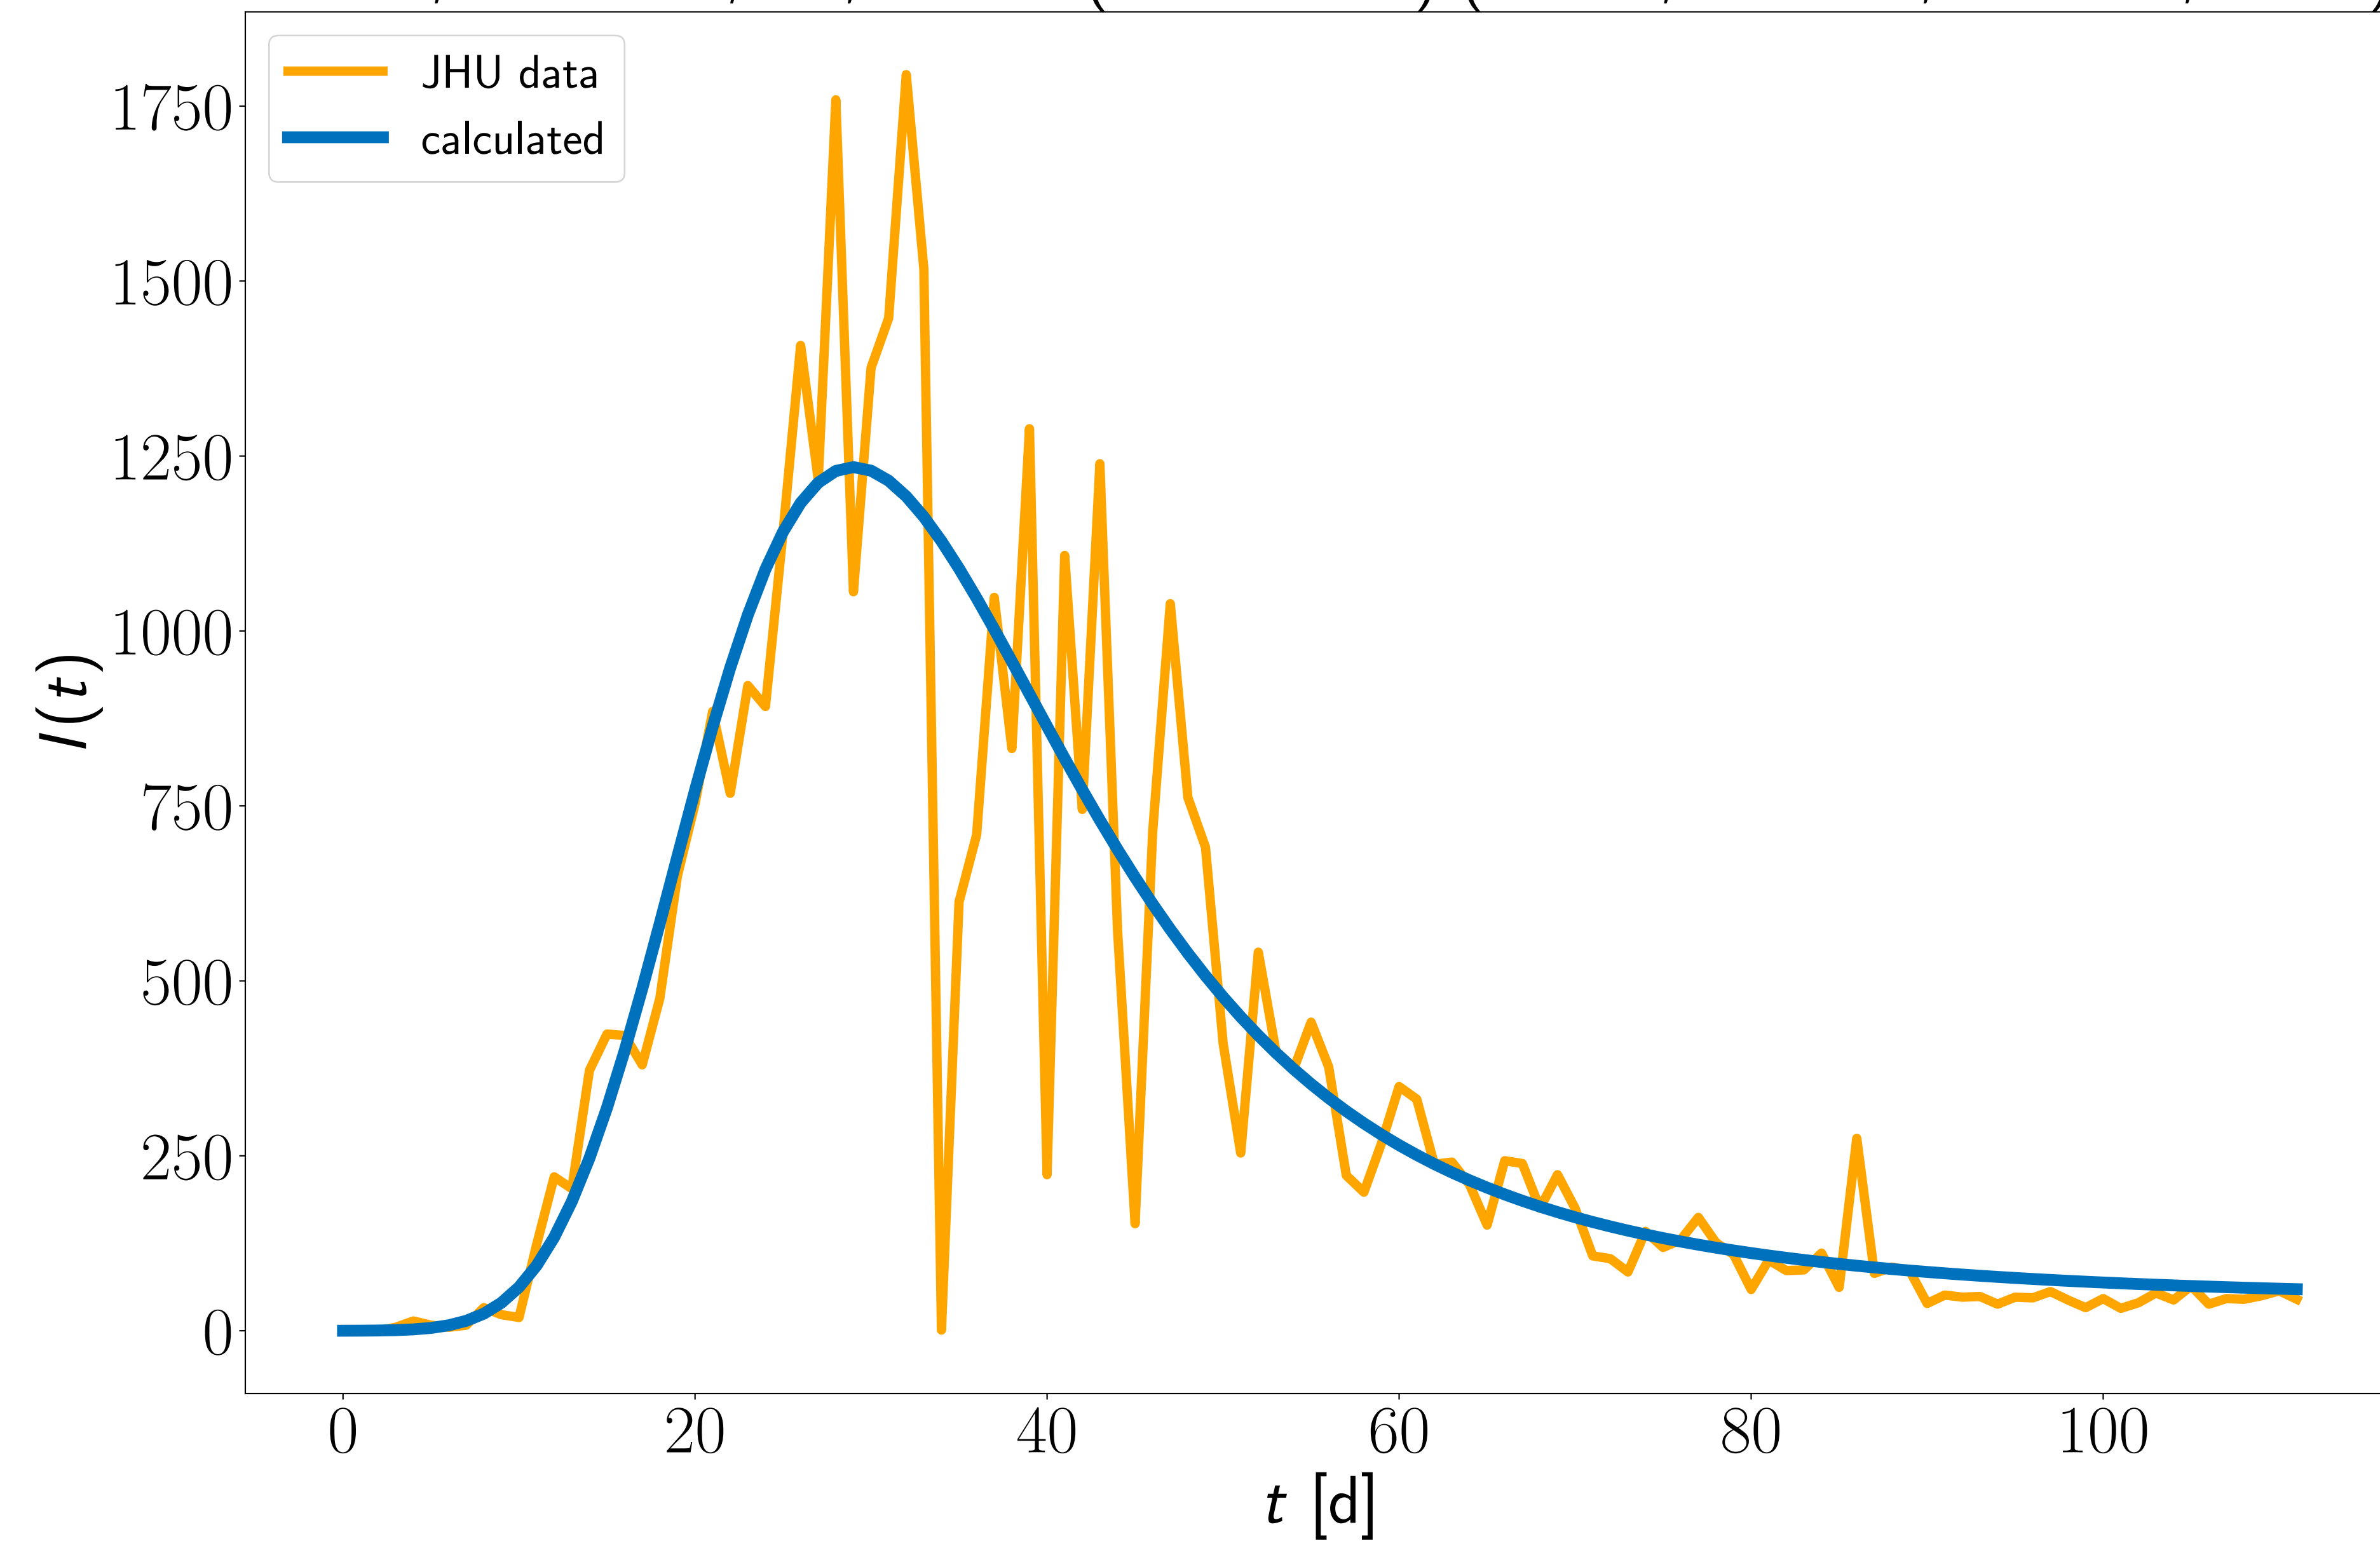

Suffolk, New York, US, Suffolk ( $R^2 = 0.972$ ) (i: 40.6, a: 0.447, b: 0.048, t: 8.5)

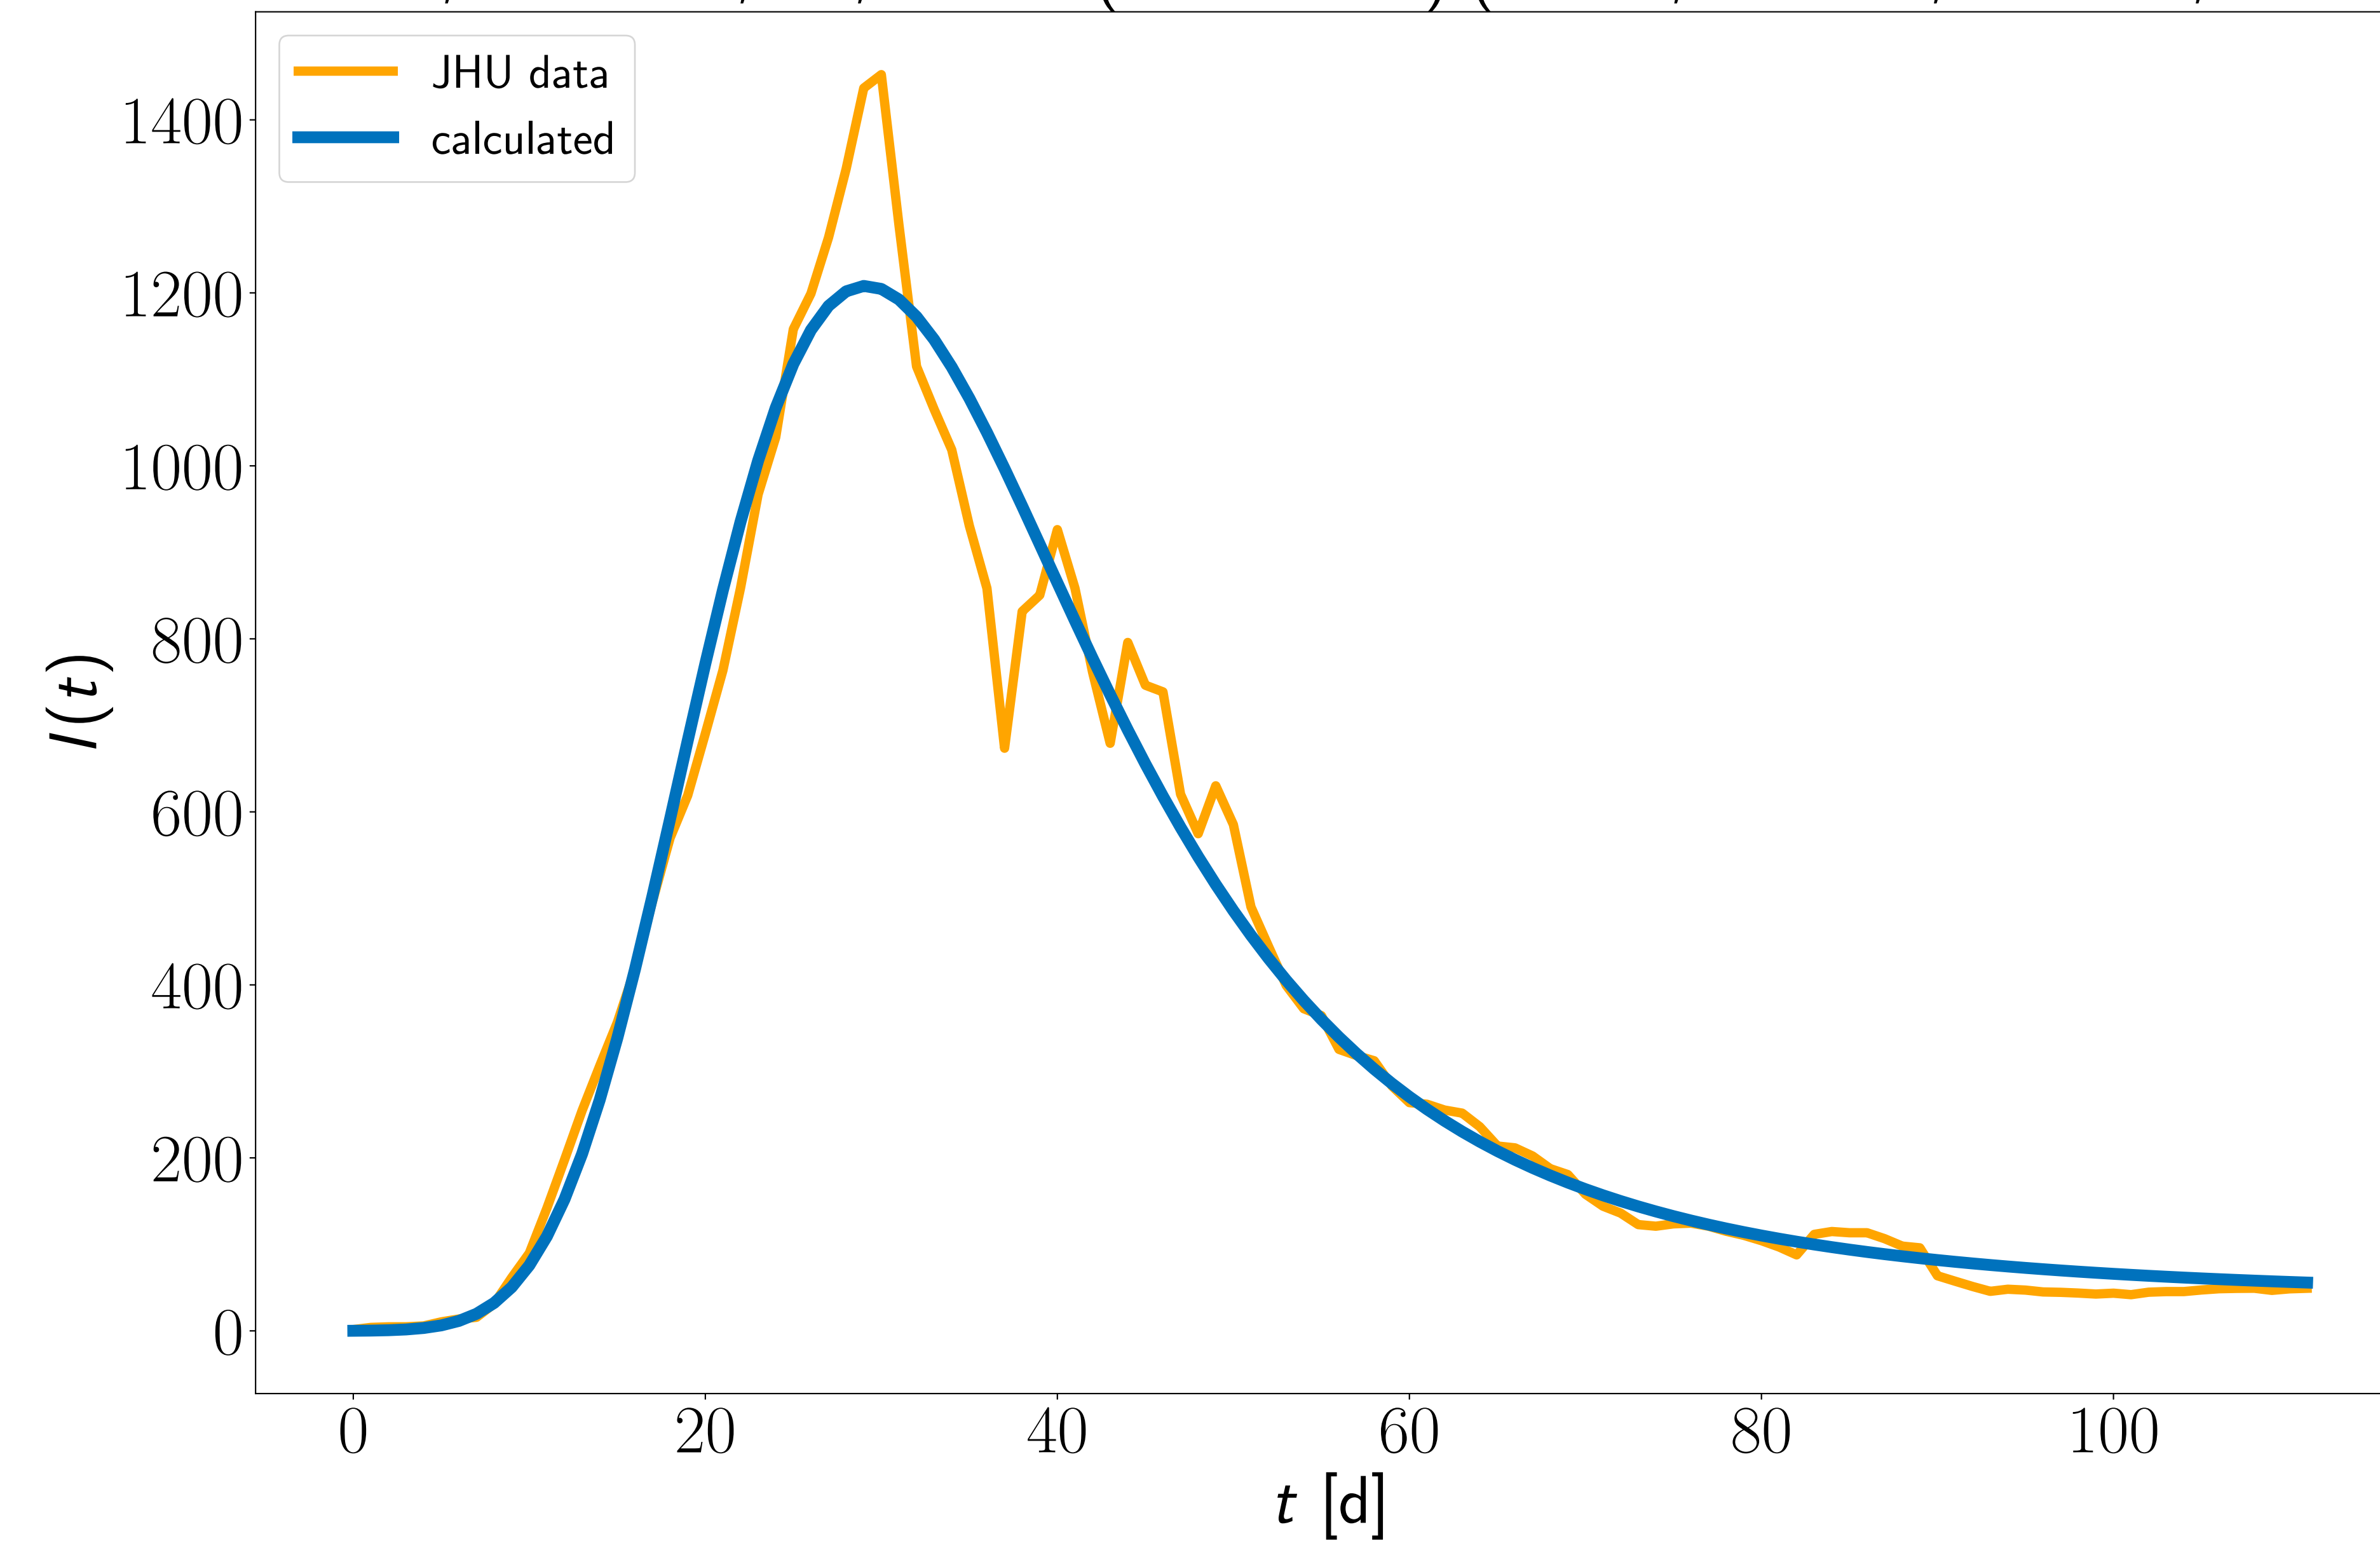

Horry, South Carolina, US, Horry ( $R^2 = 0.886$ ) (i: 188.8, a: 0.001, b: 0.073, t: 129.7)

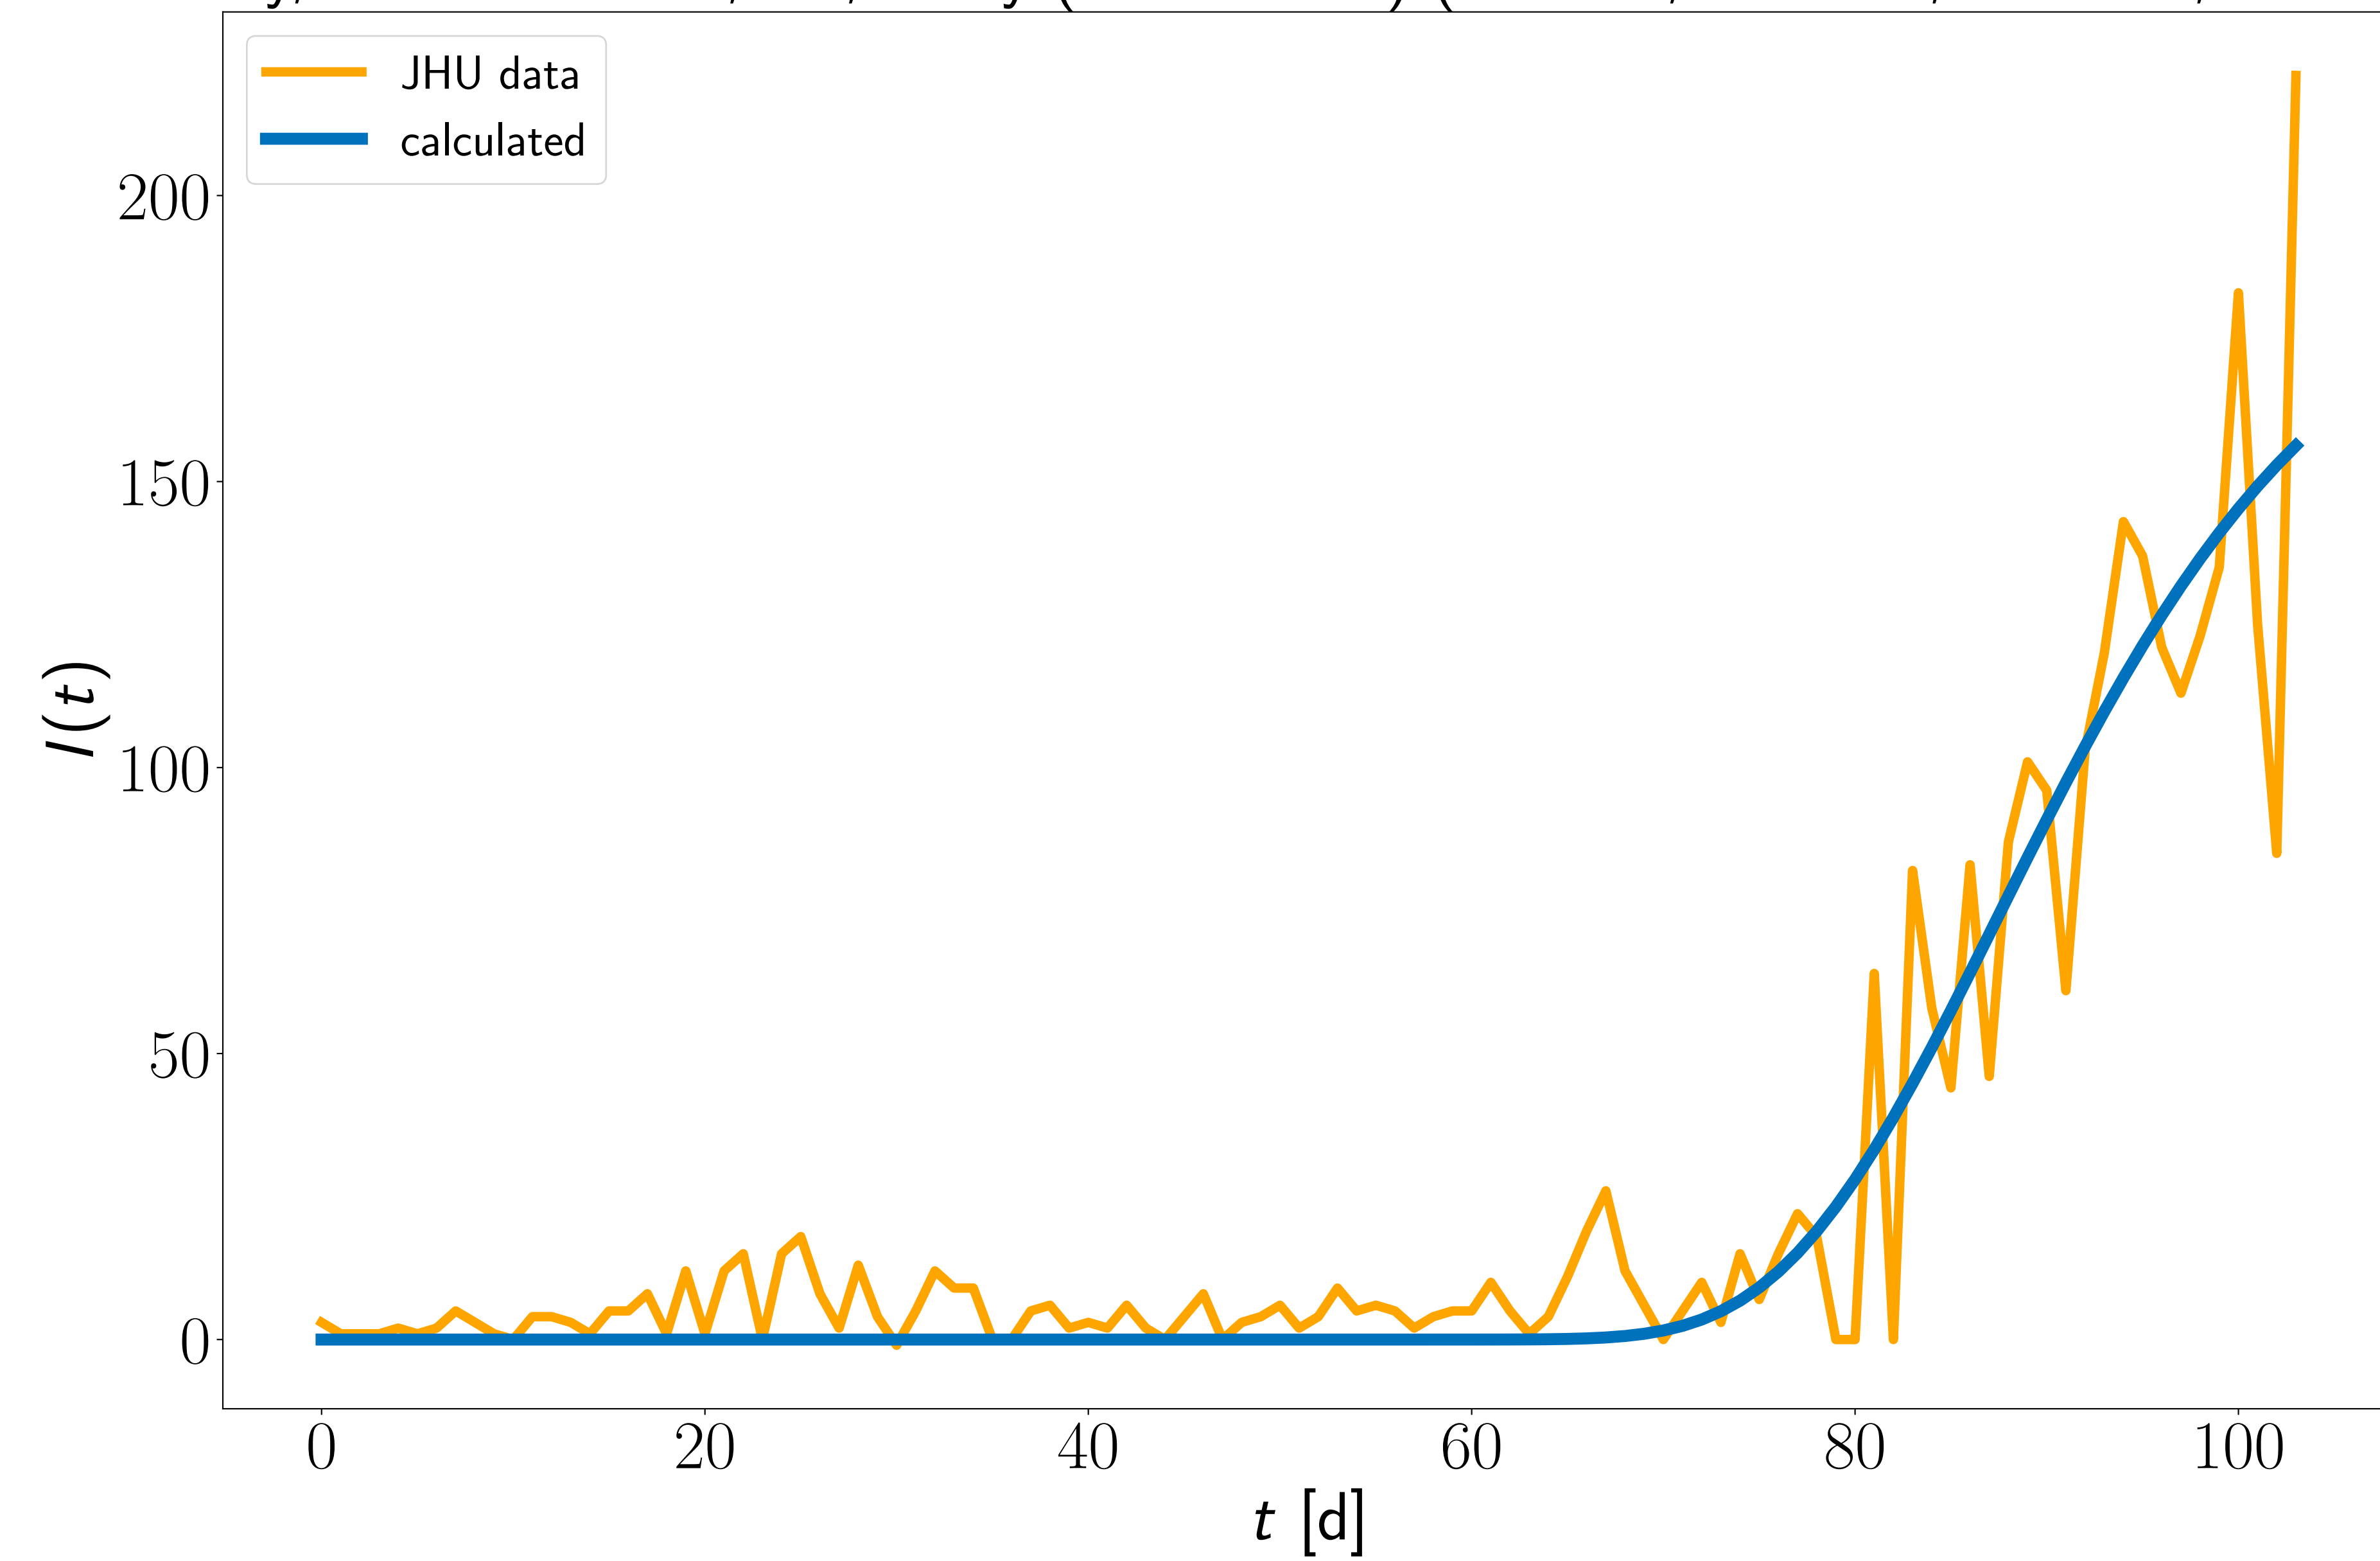

Horry, South Carolina, US, Horry ( $R^2 = 0.985$ ) (i: 0.1, a: 0.435, b: 0.022, t: 59.5)

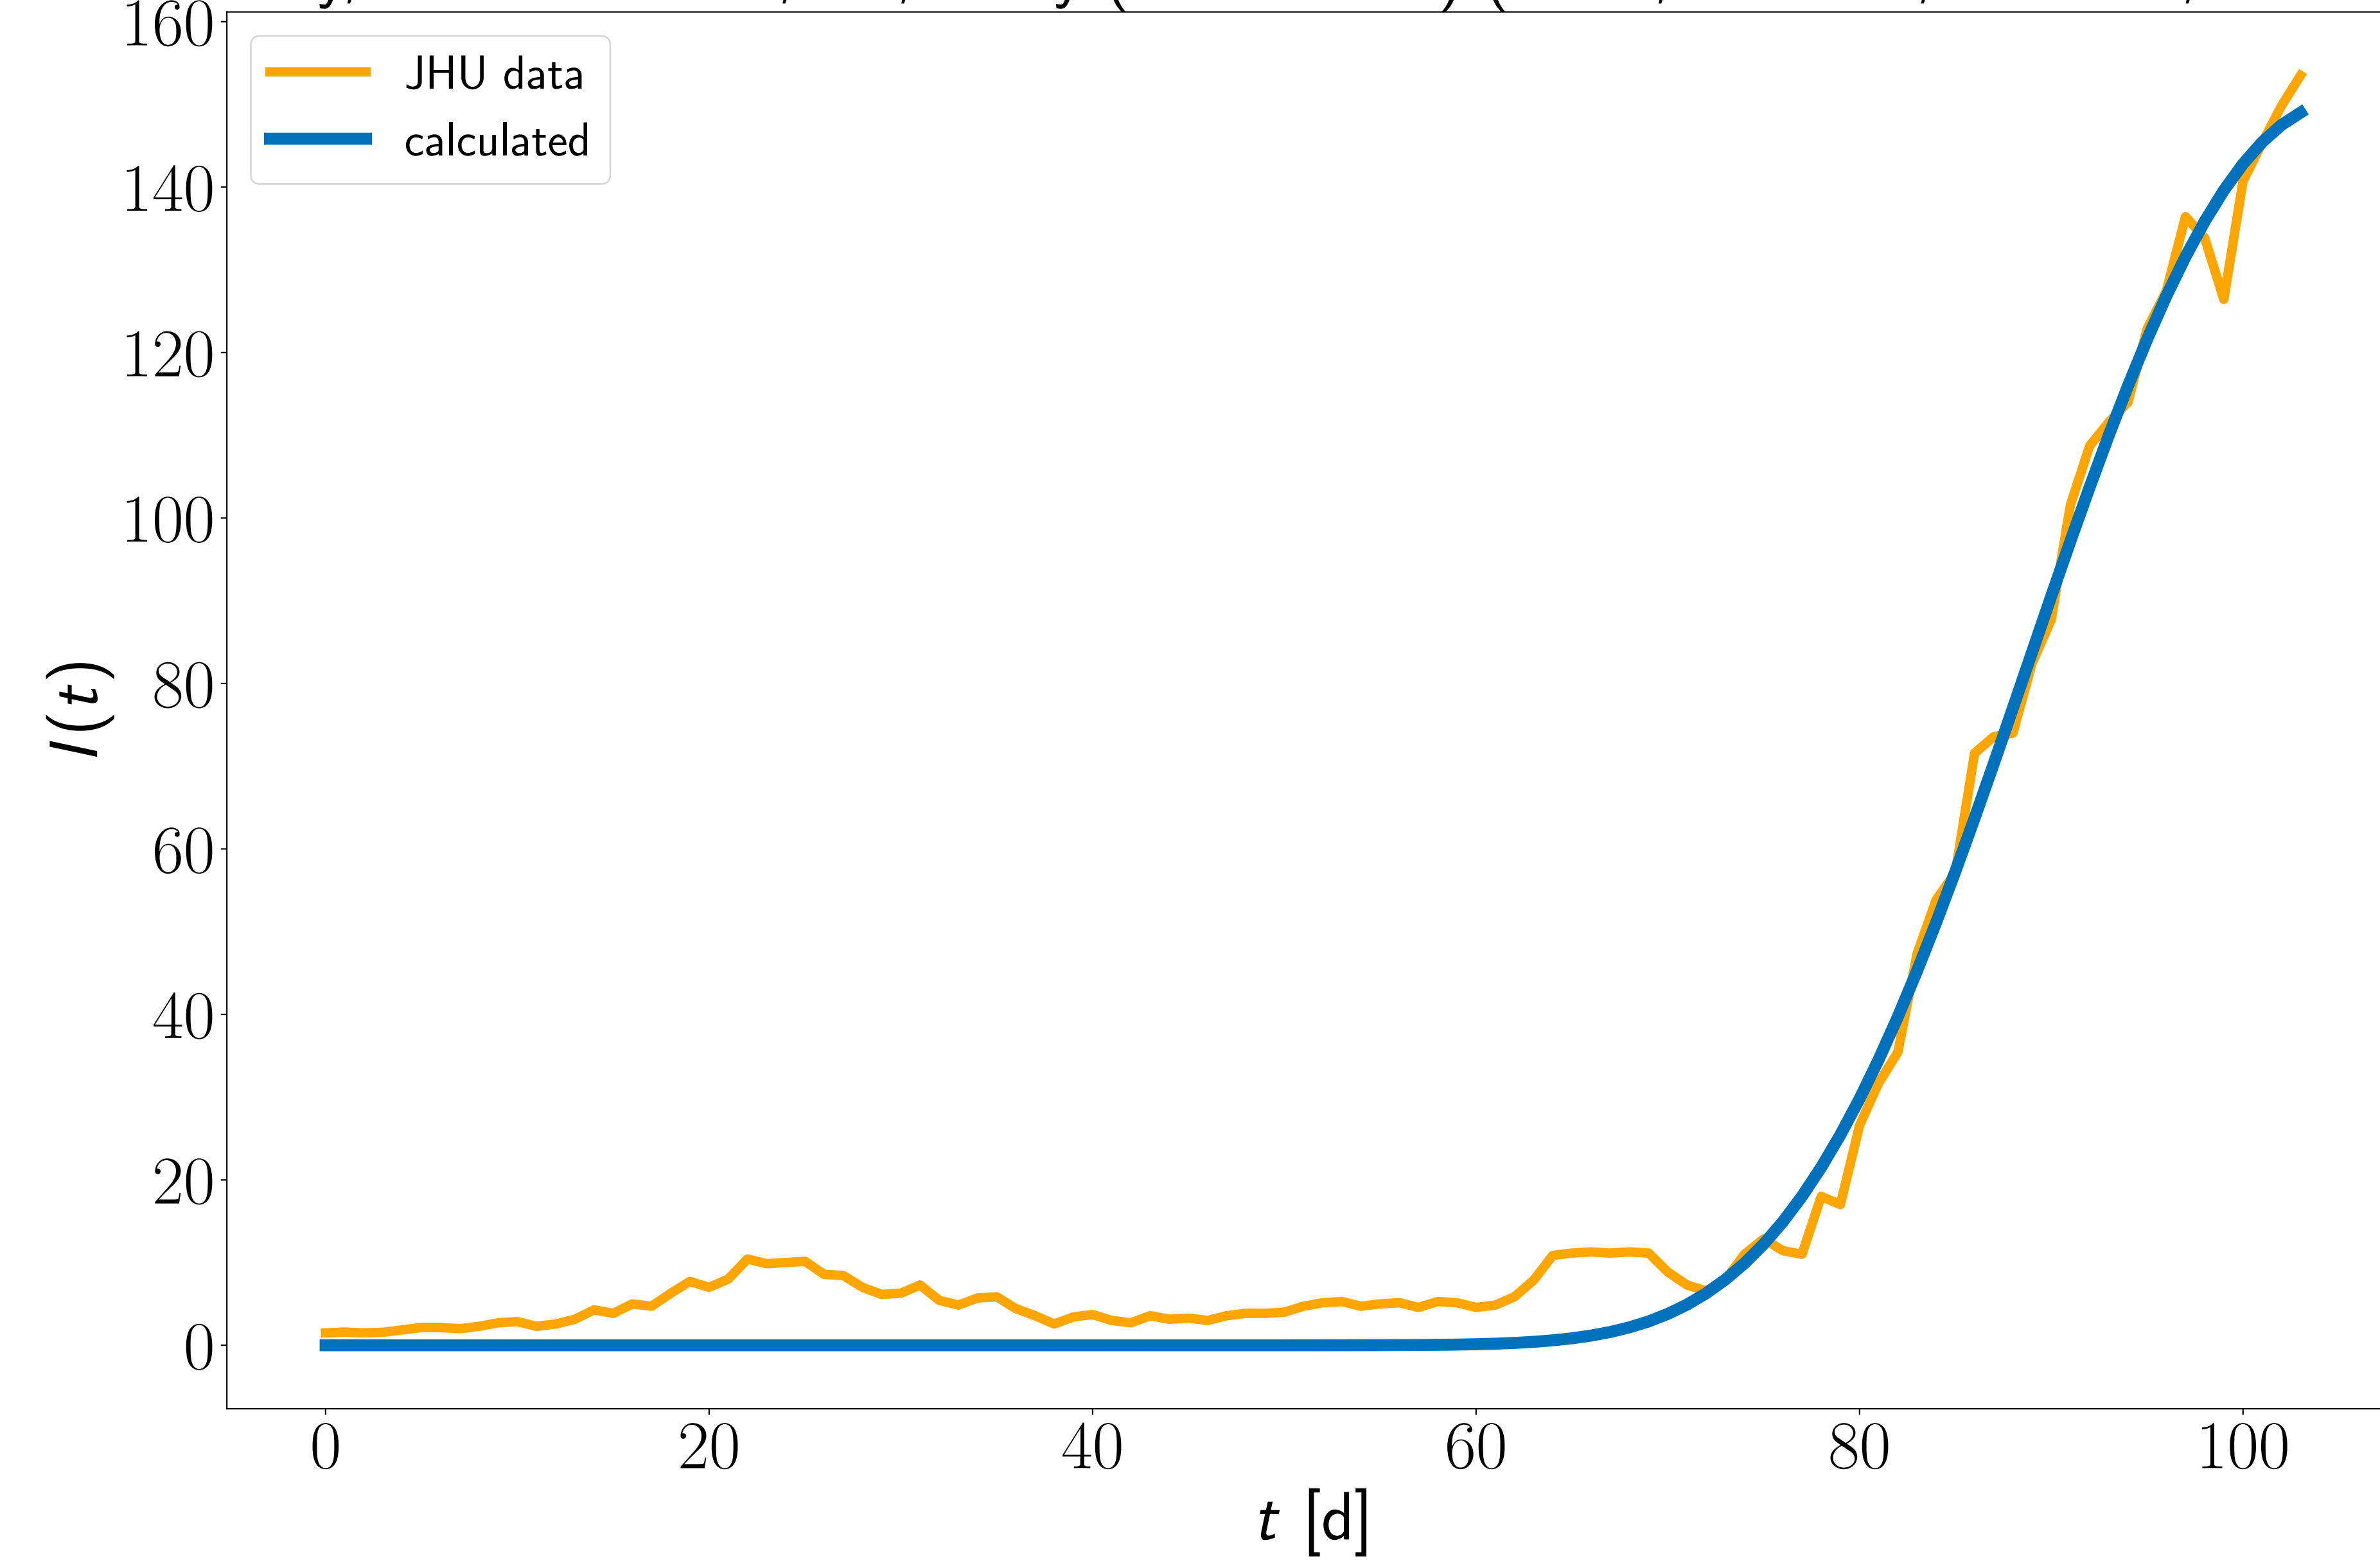

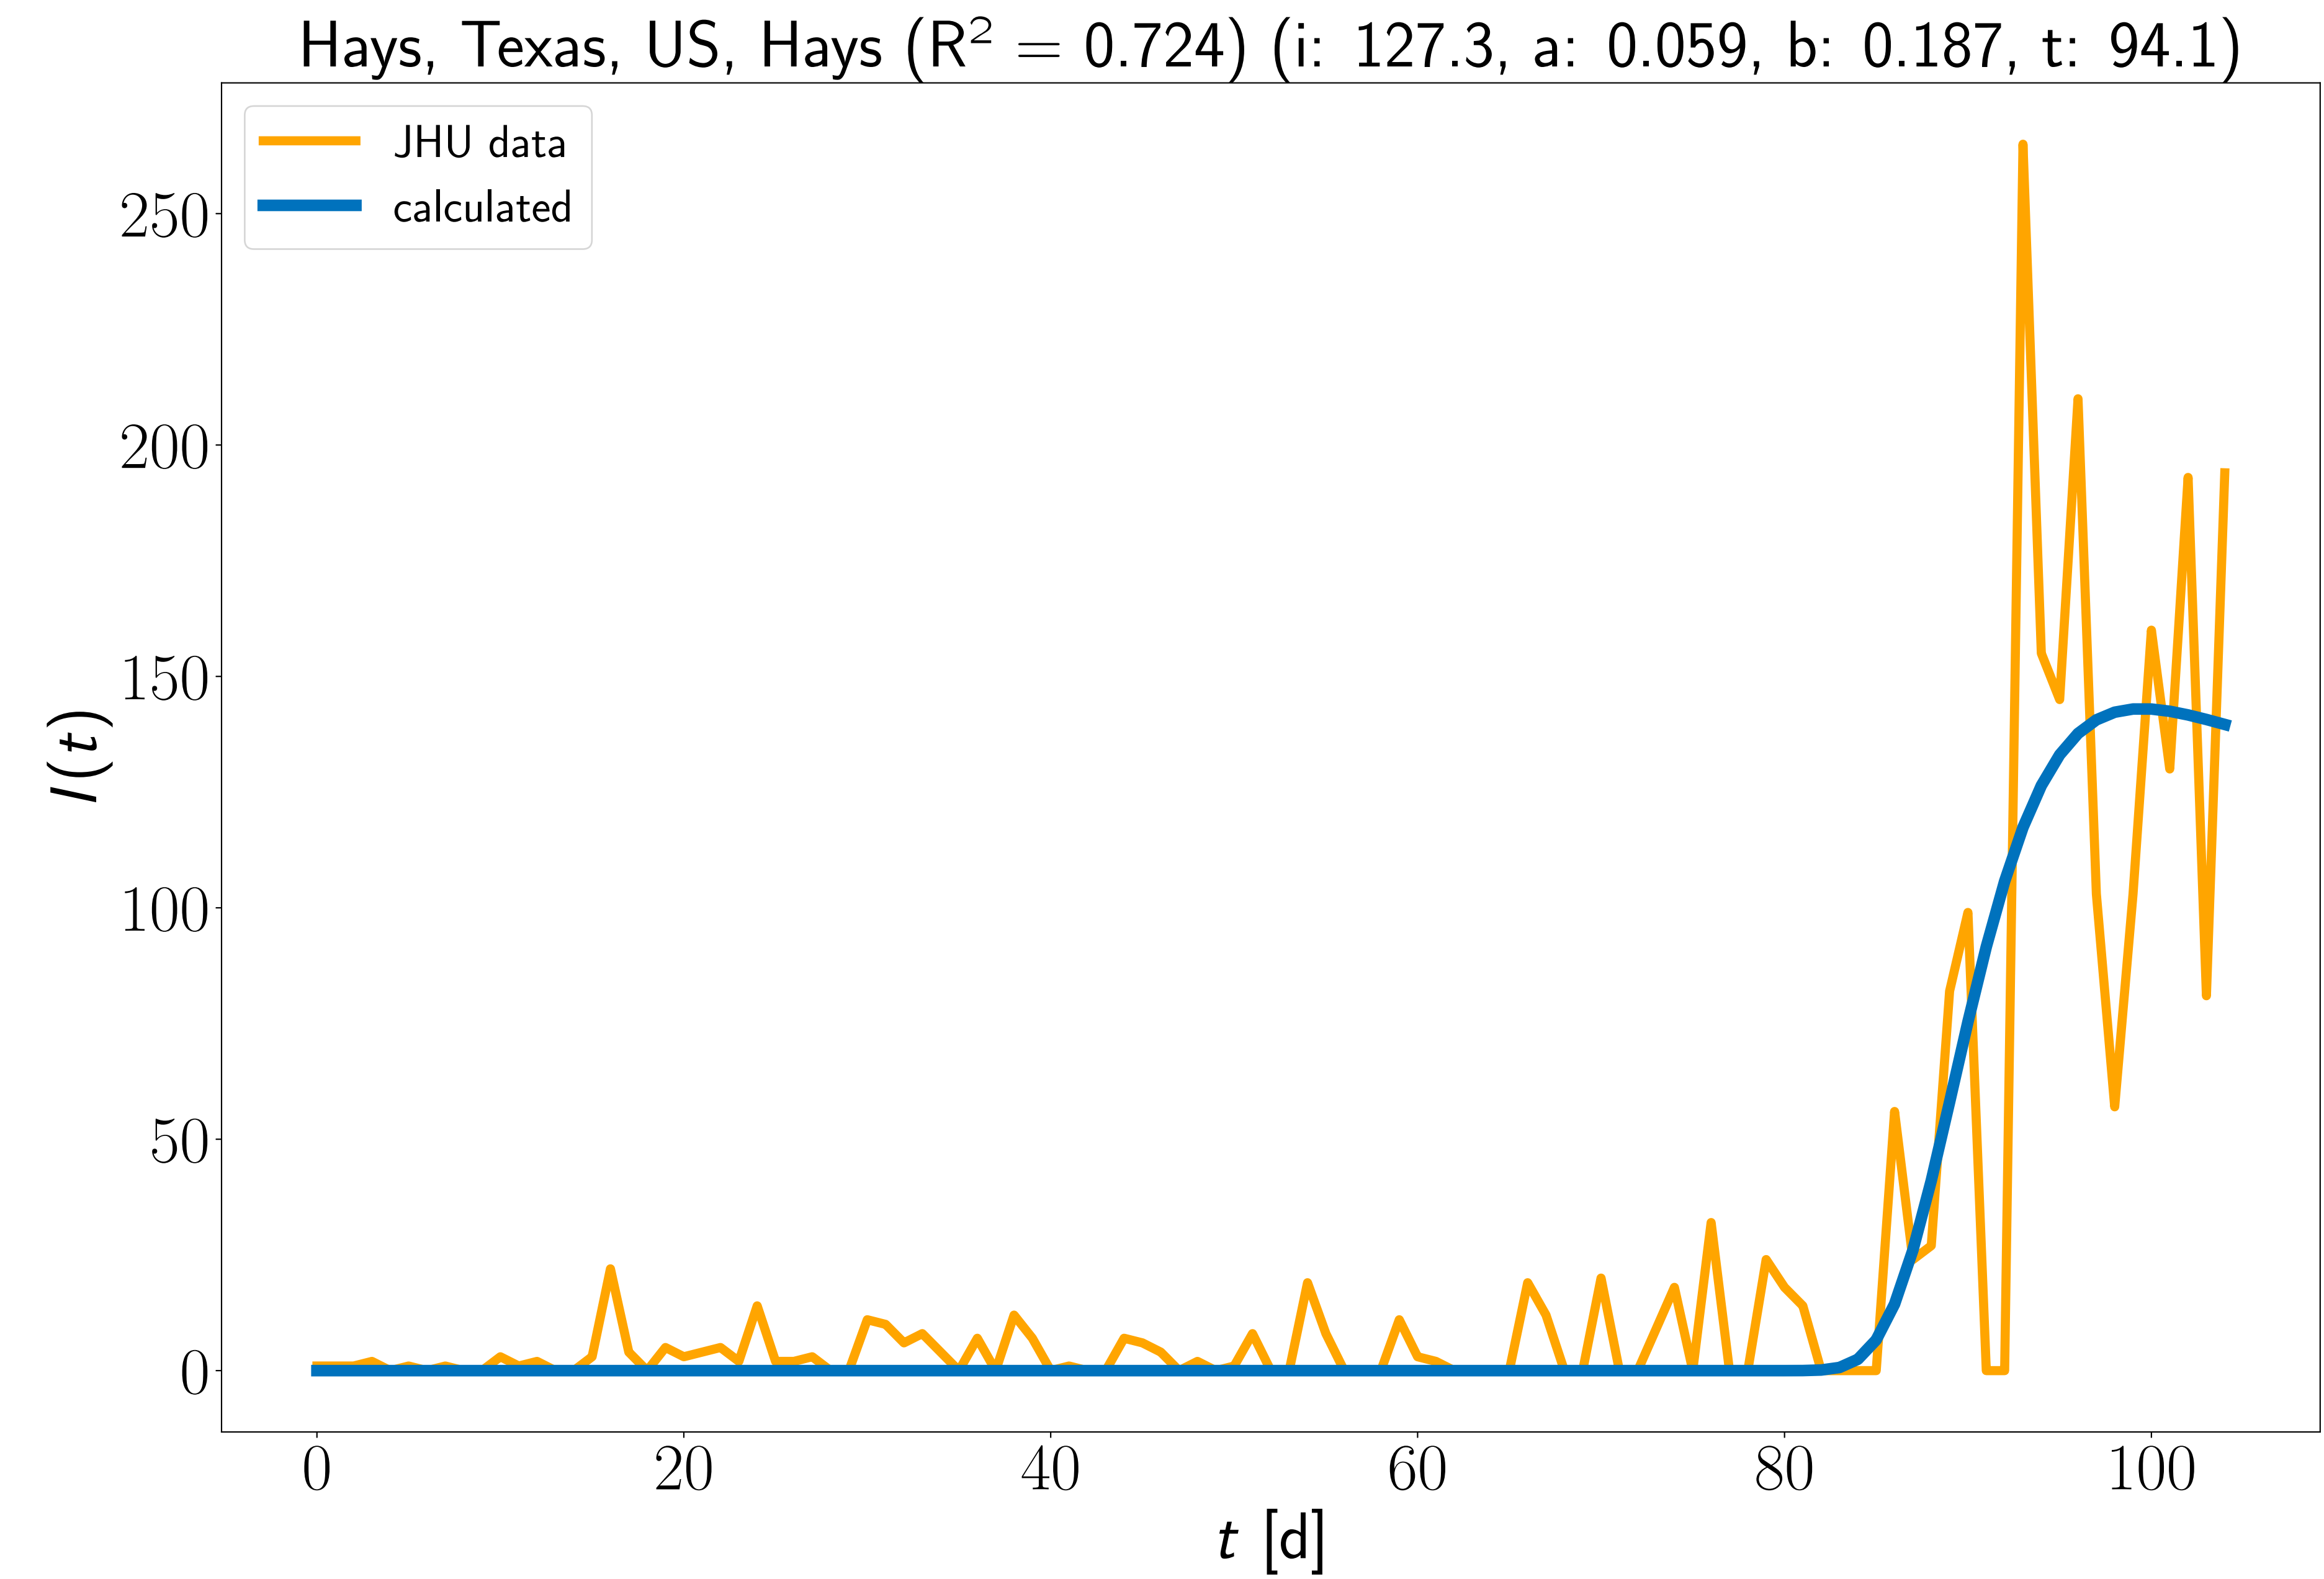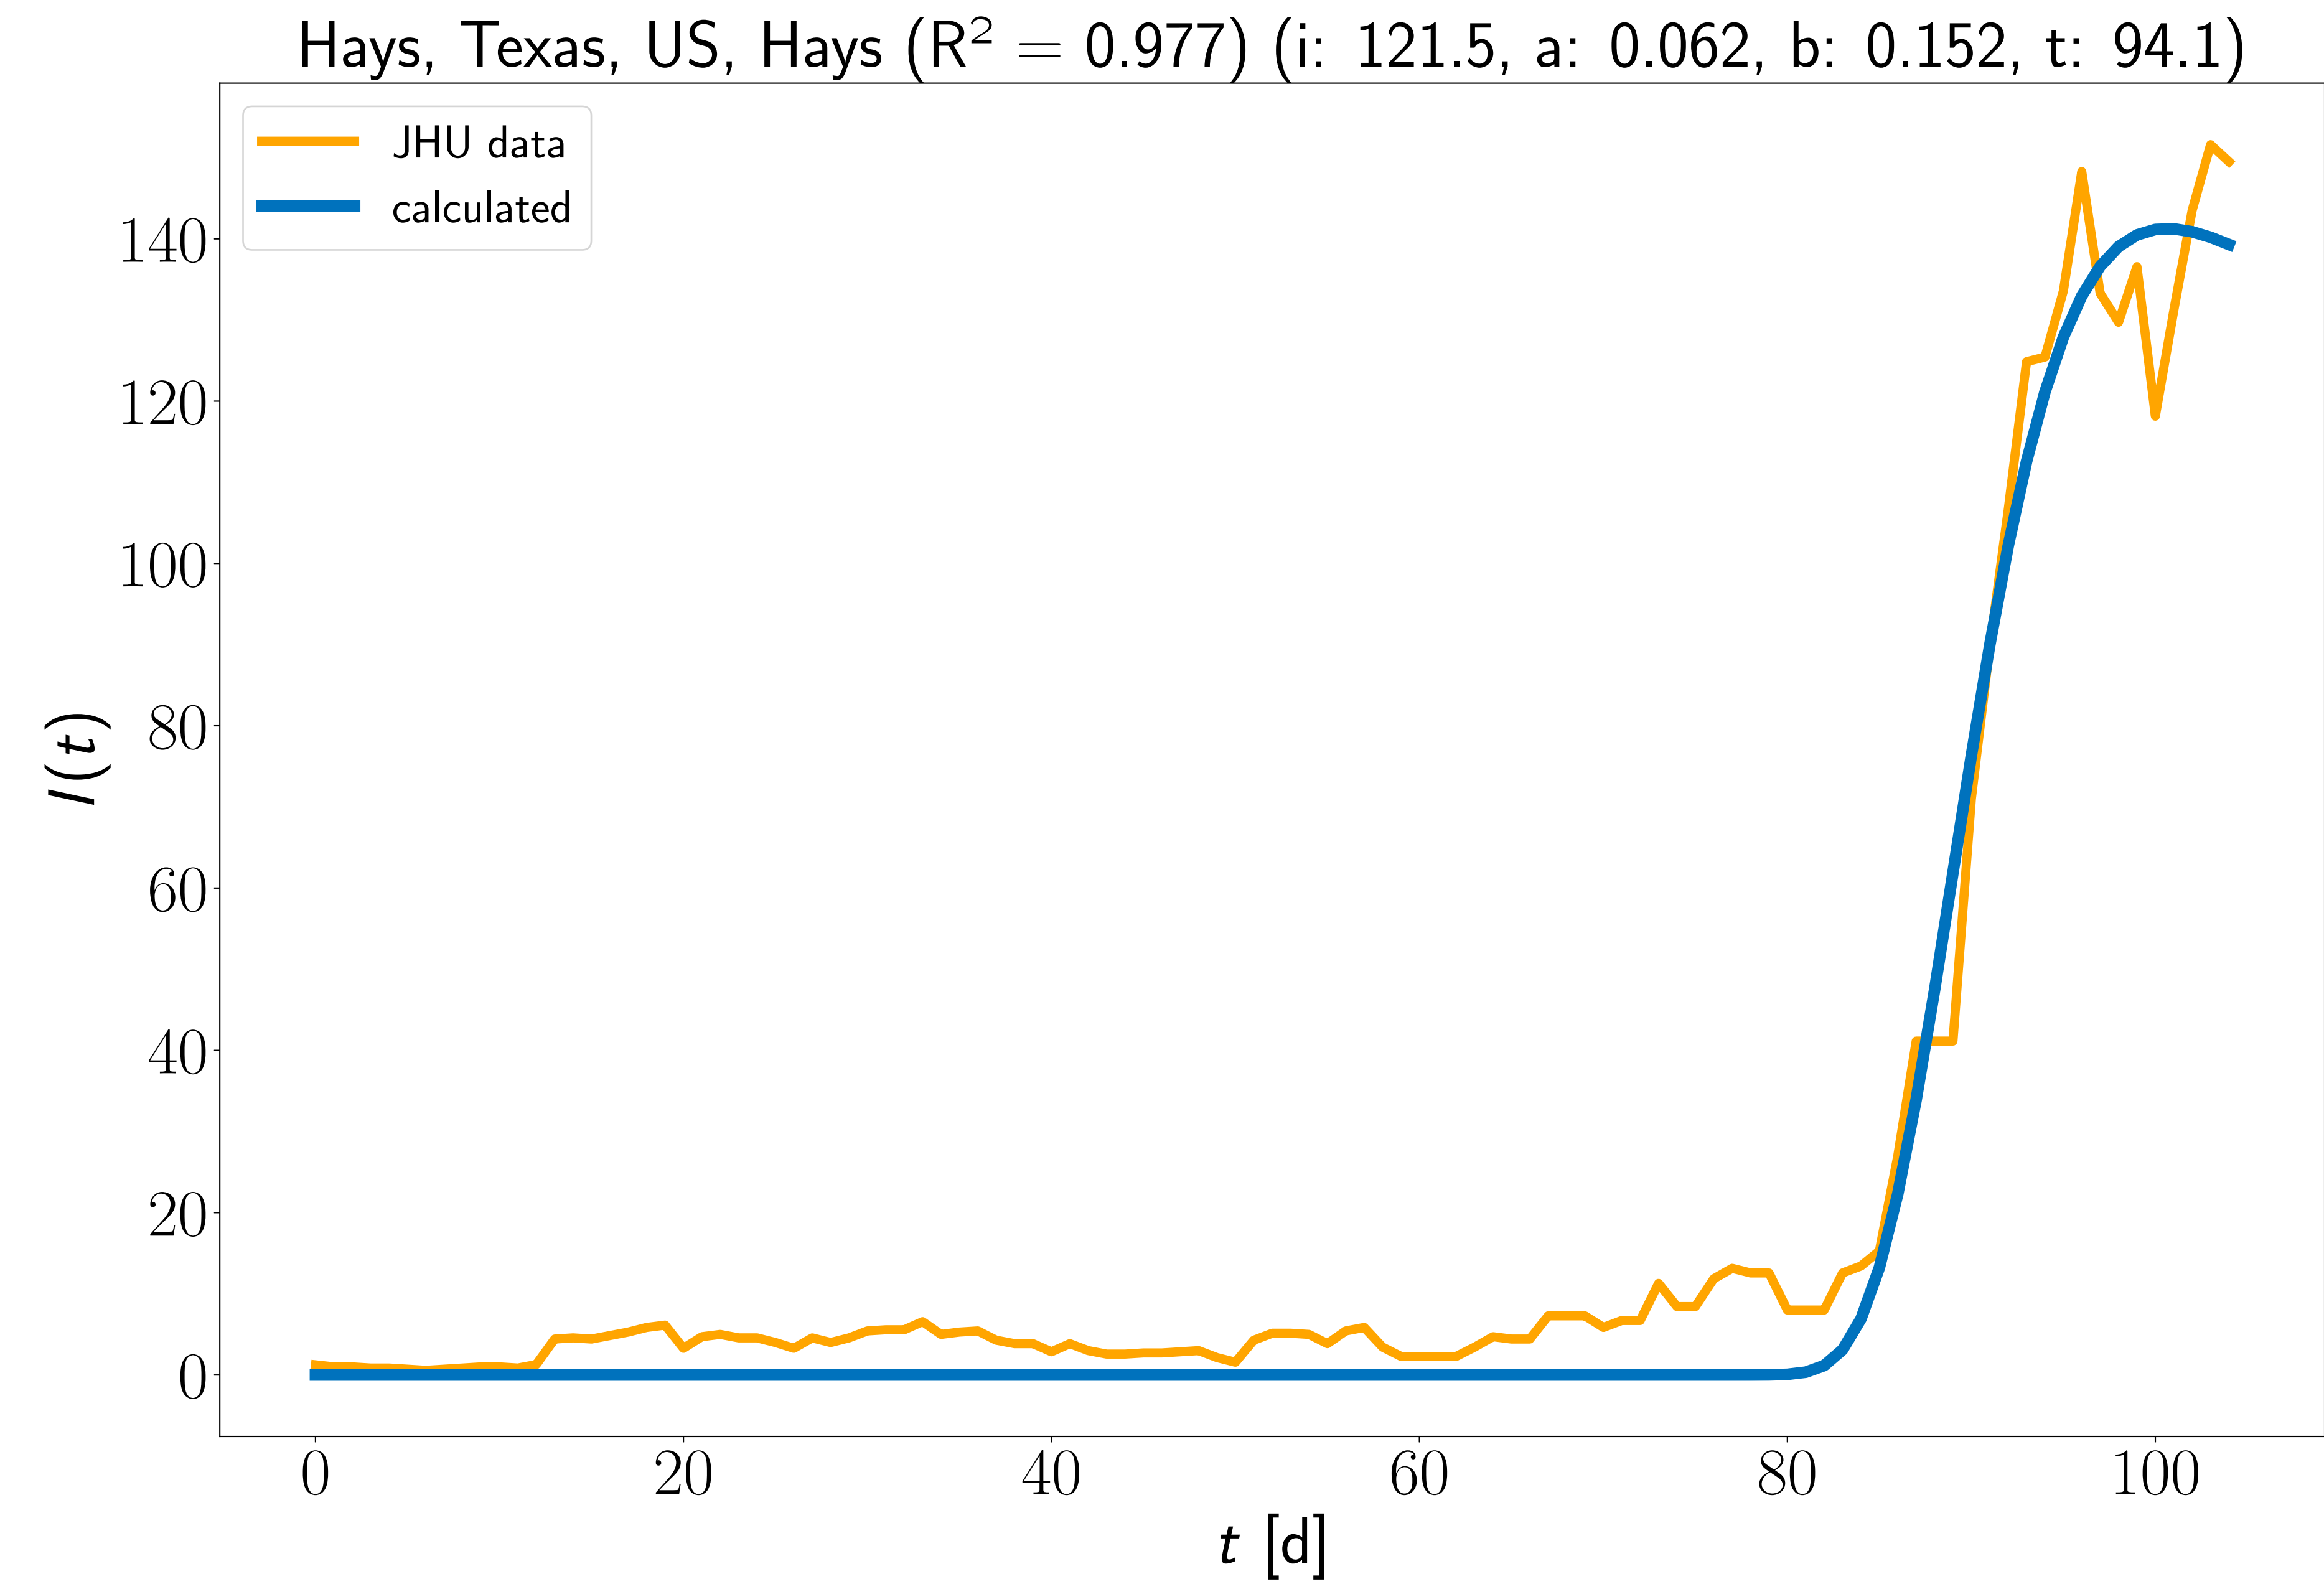

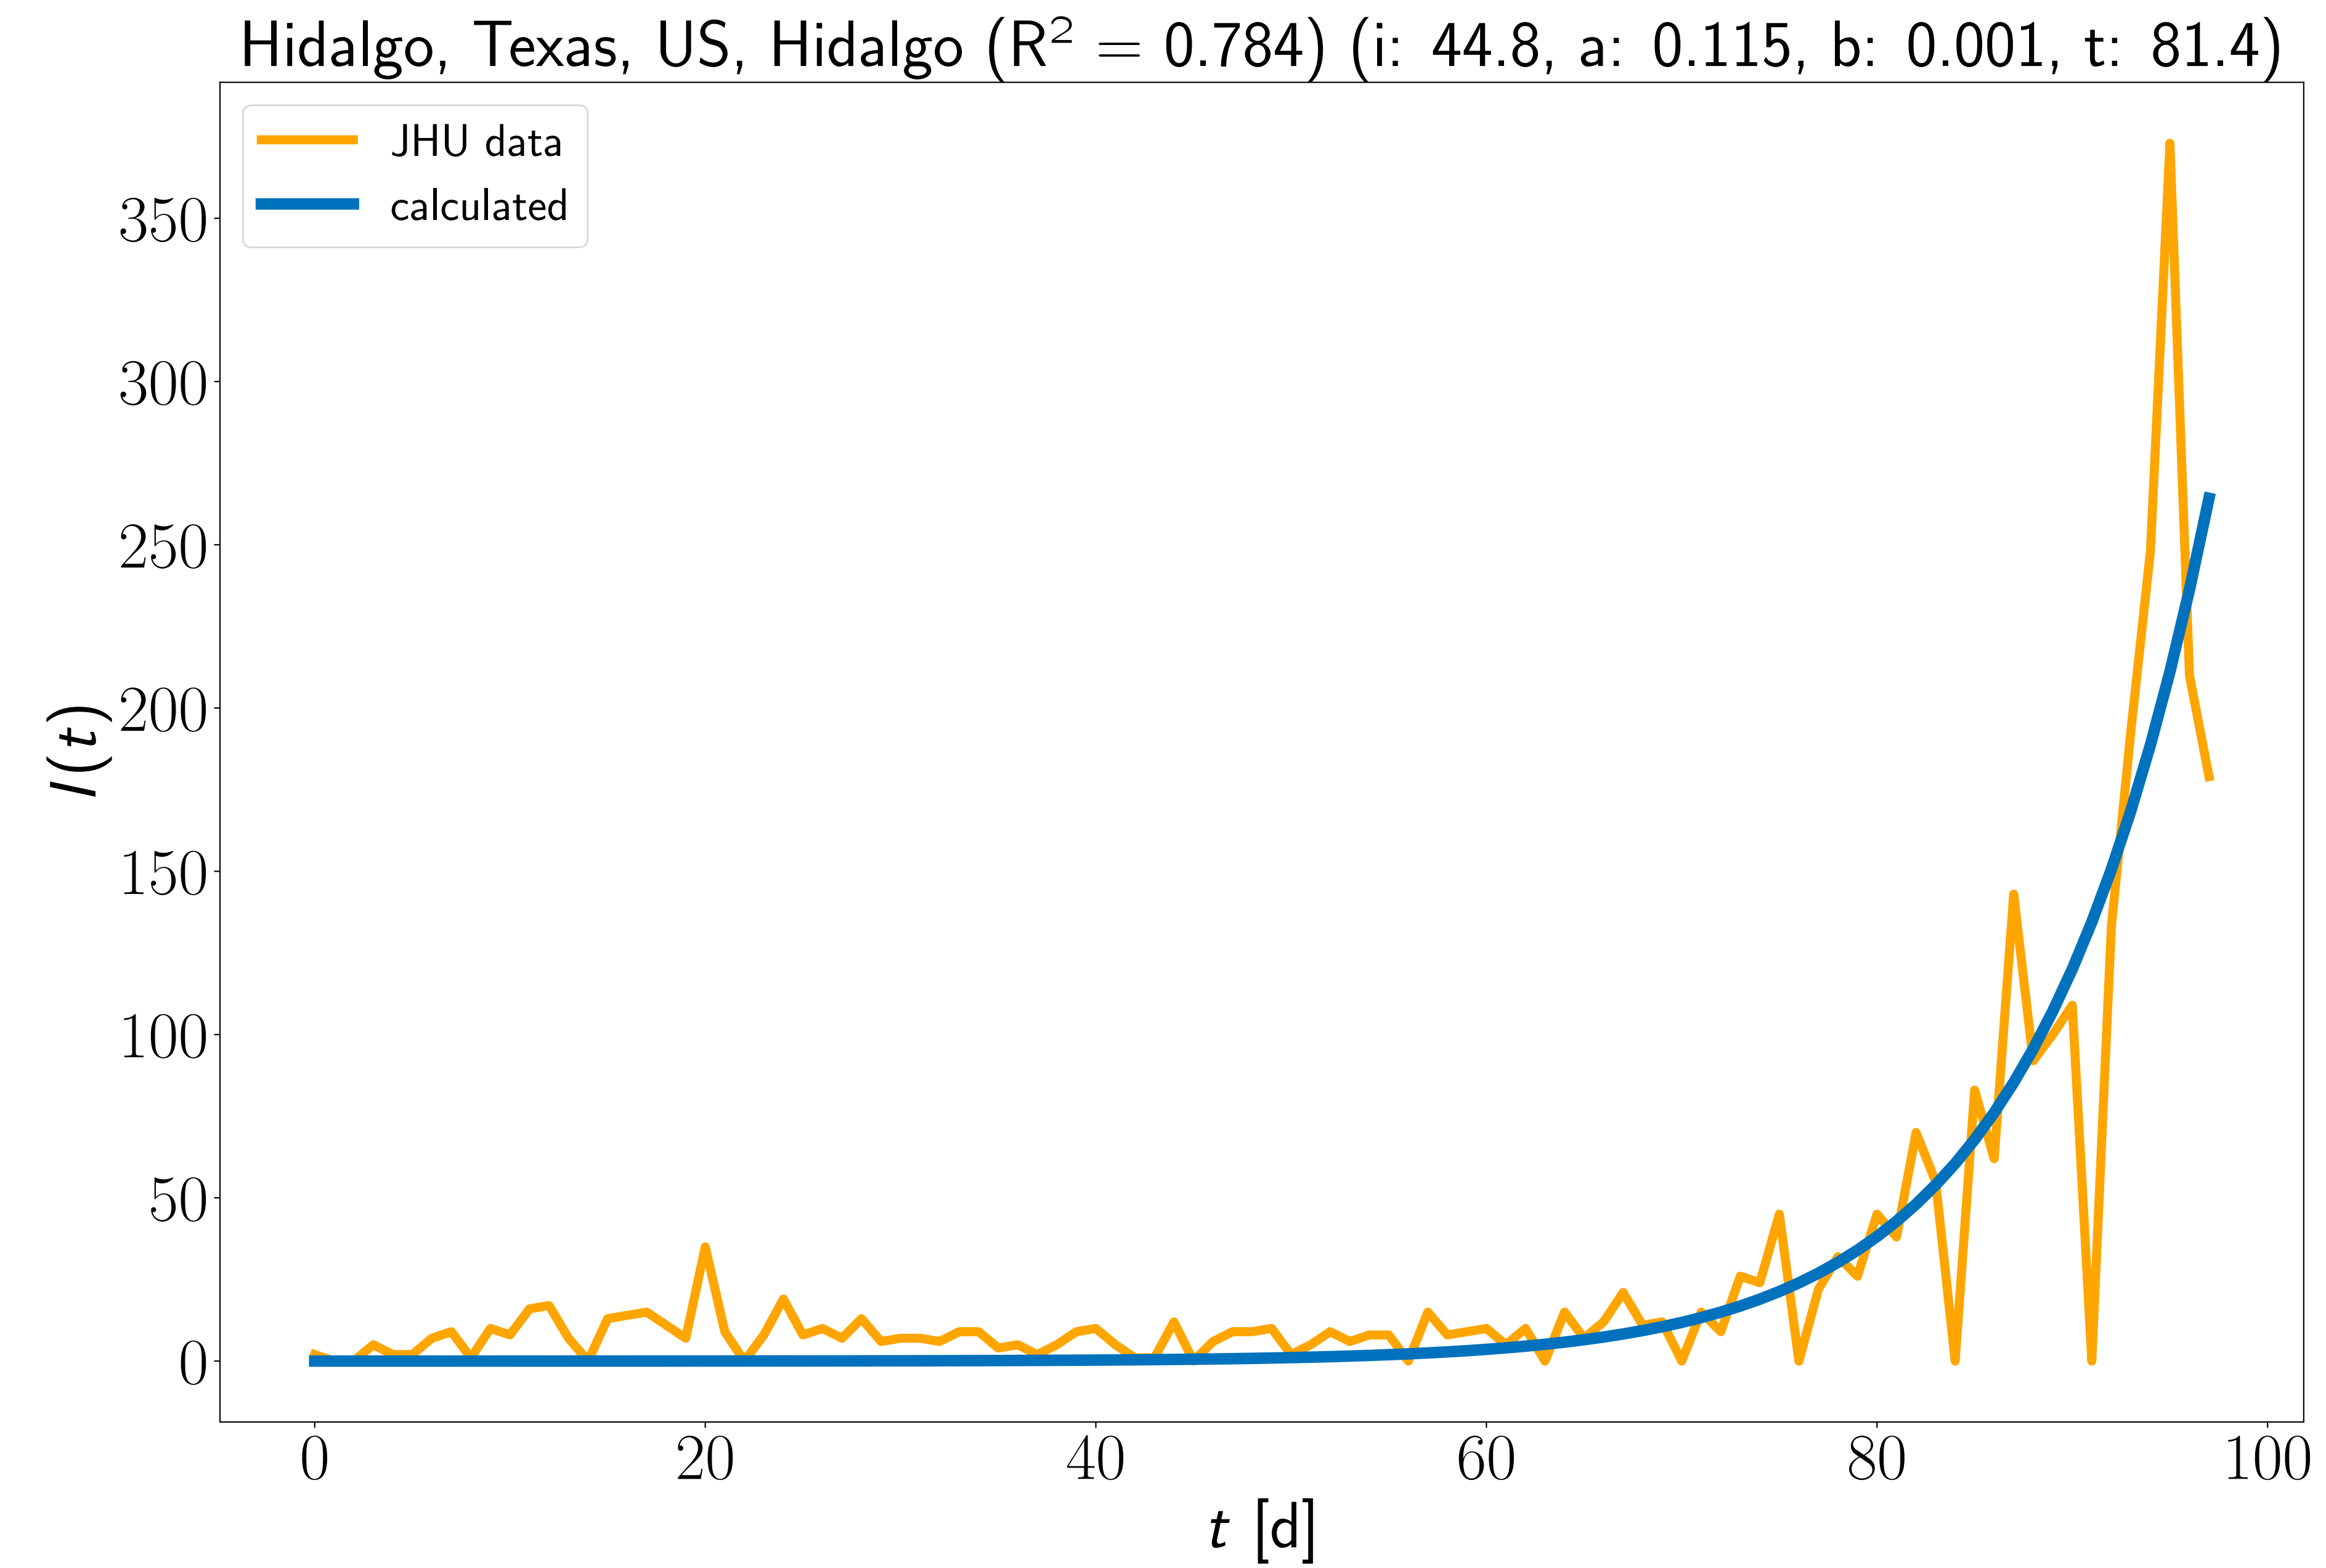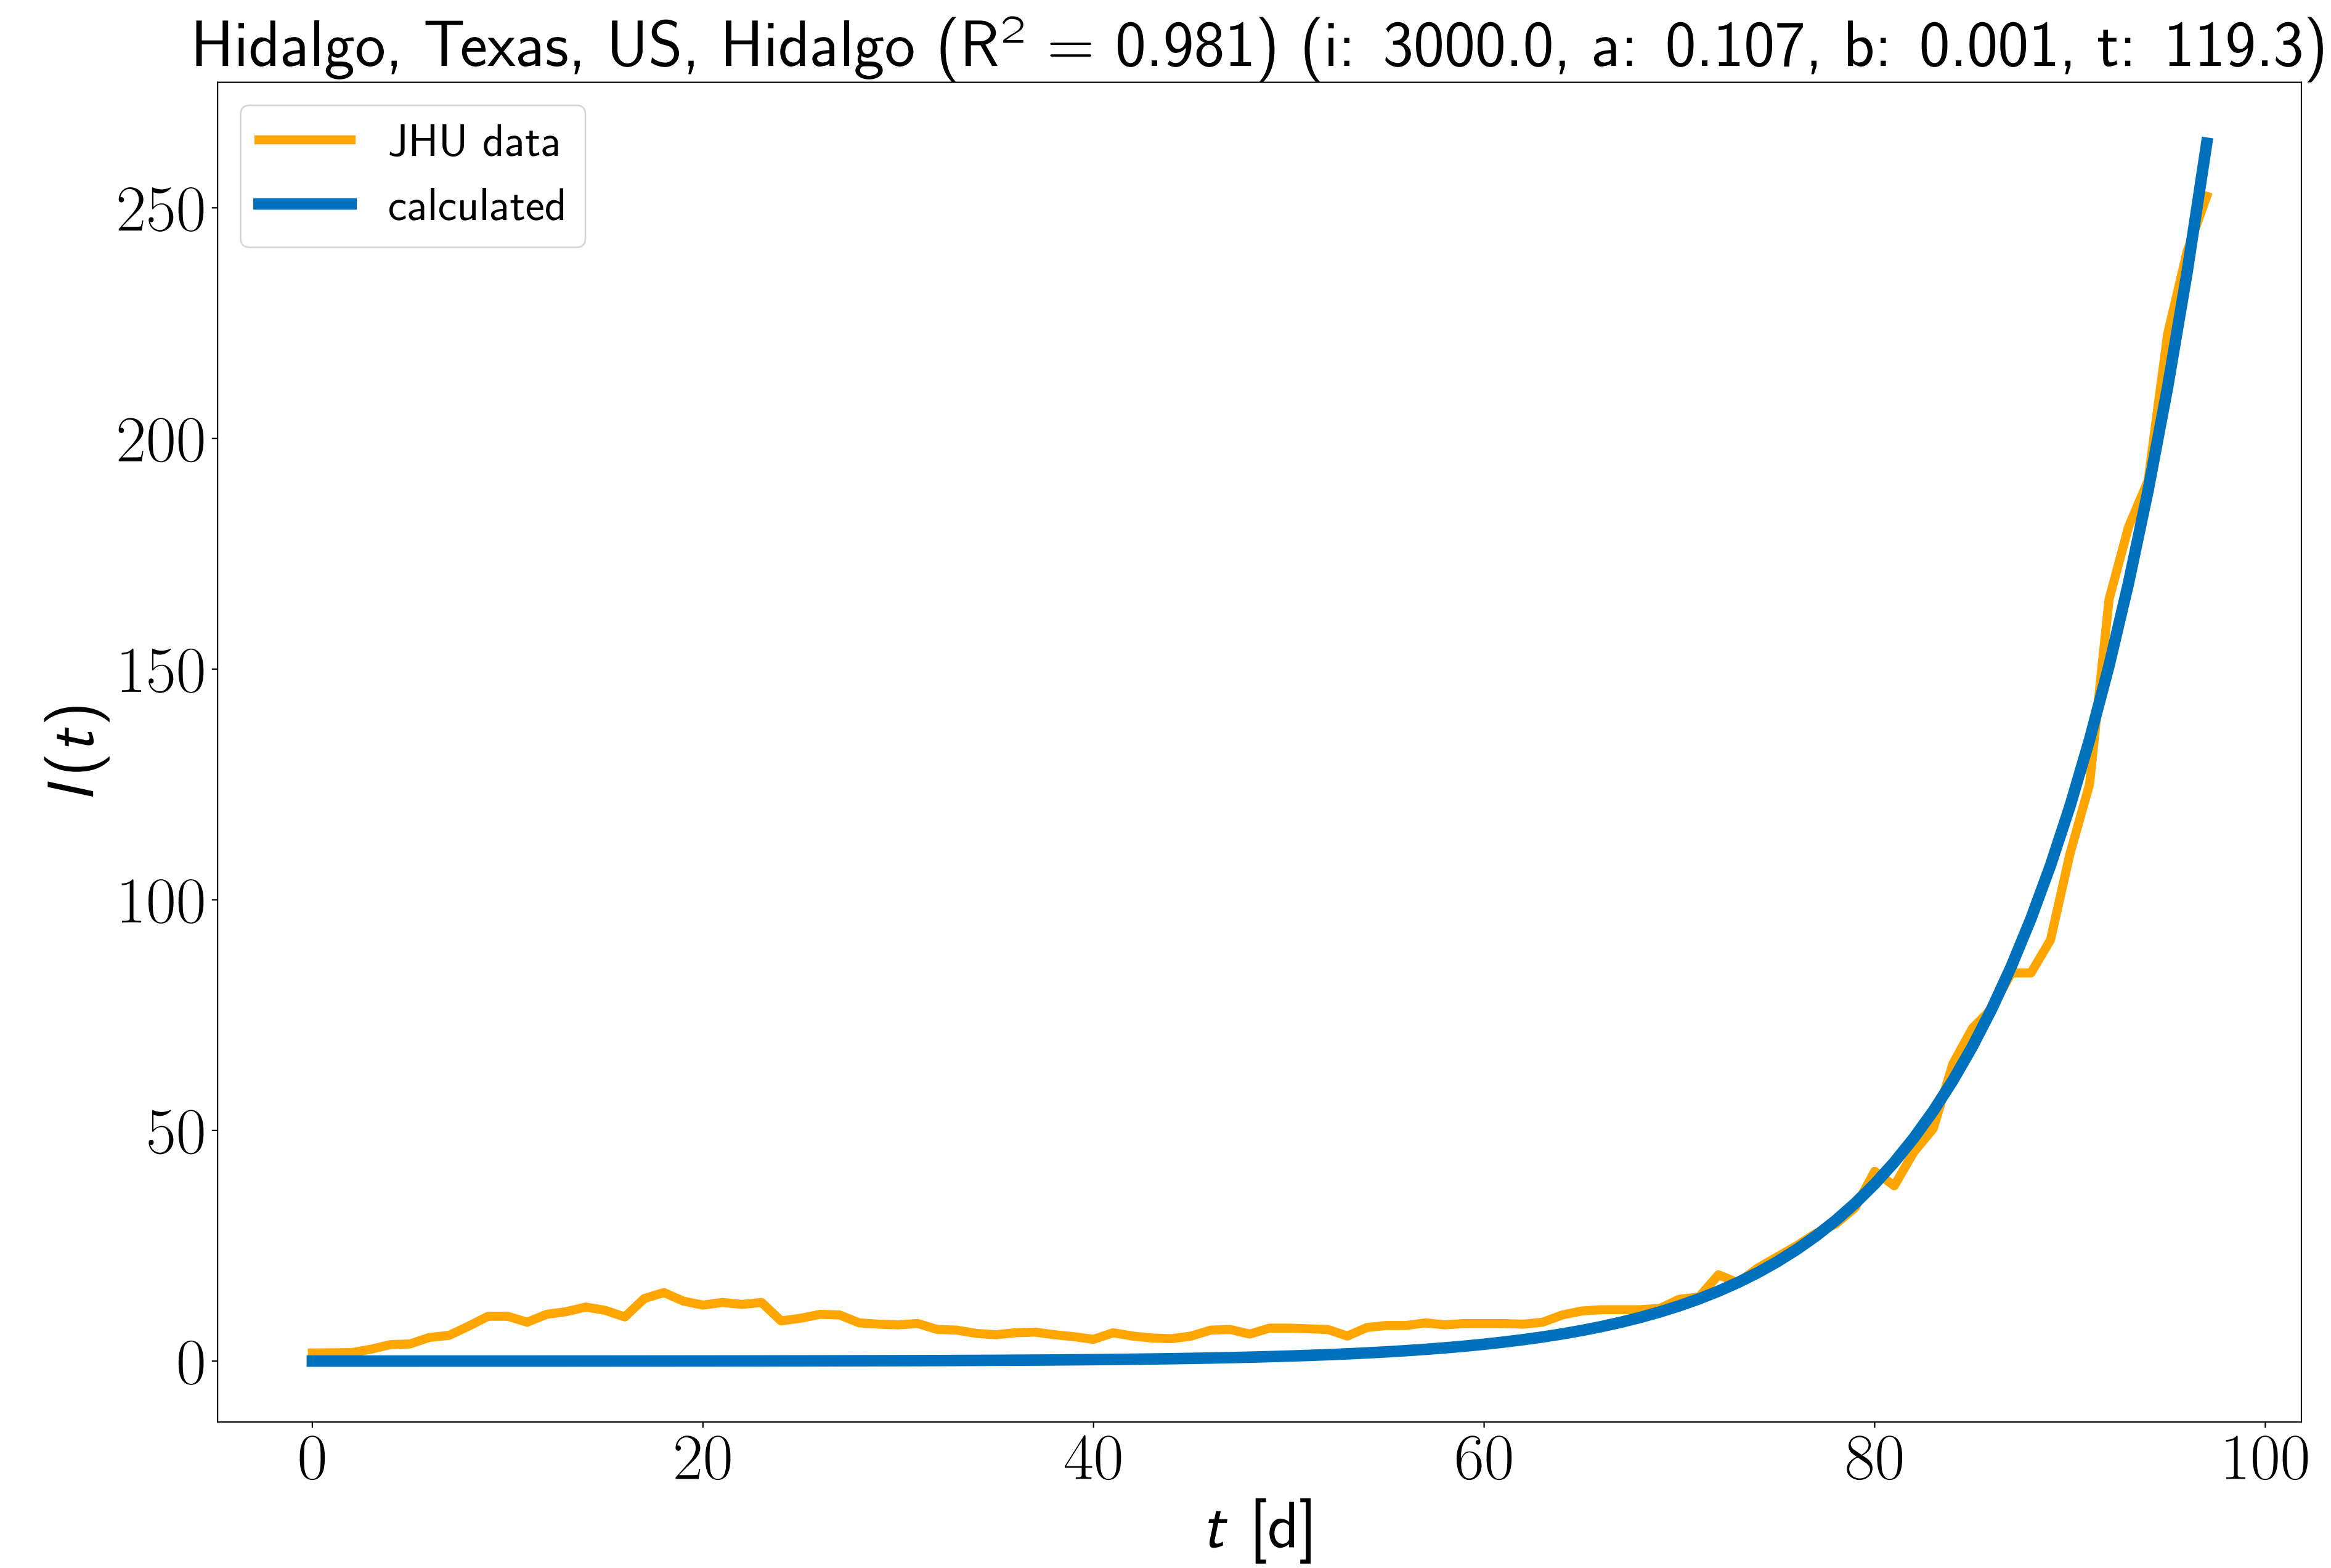

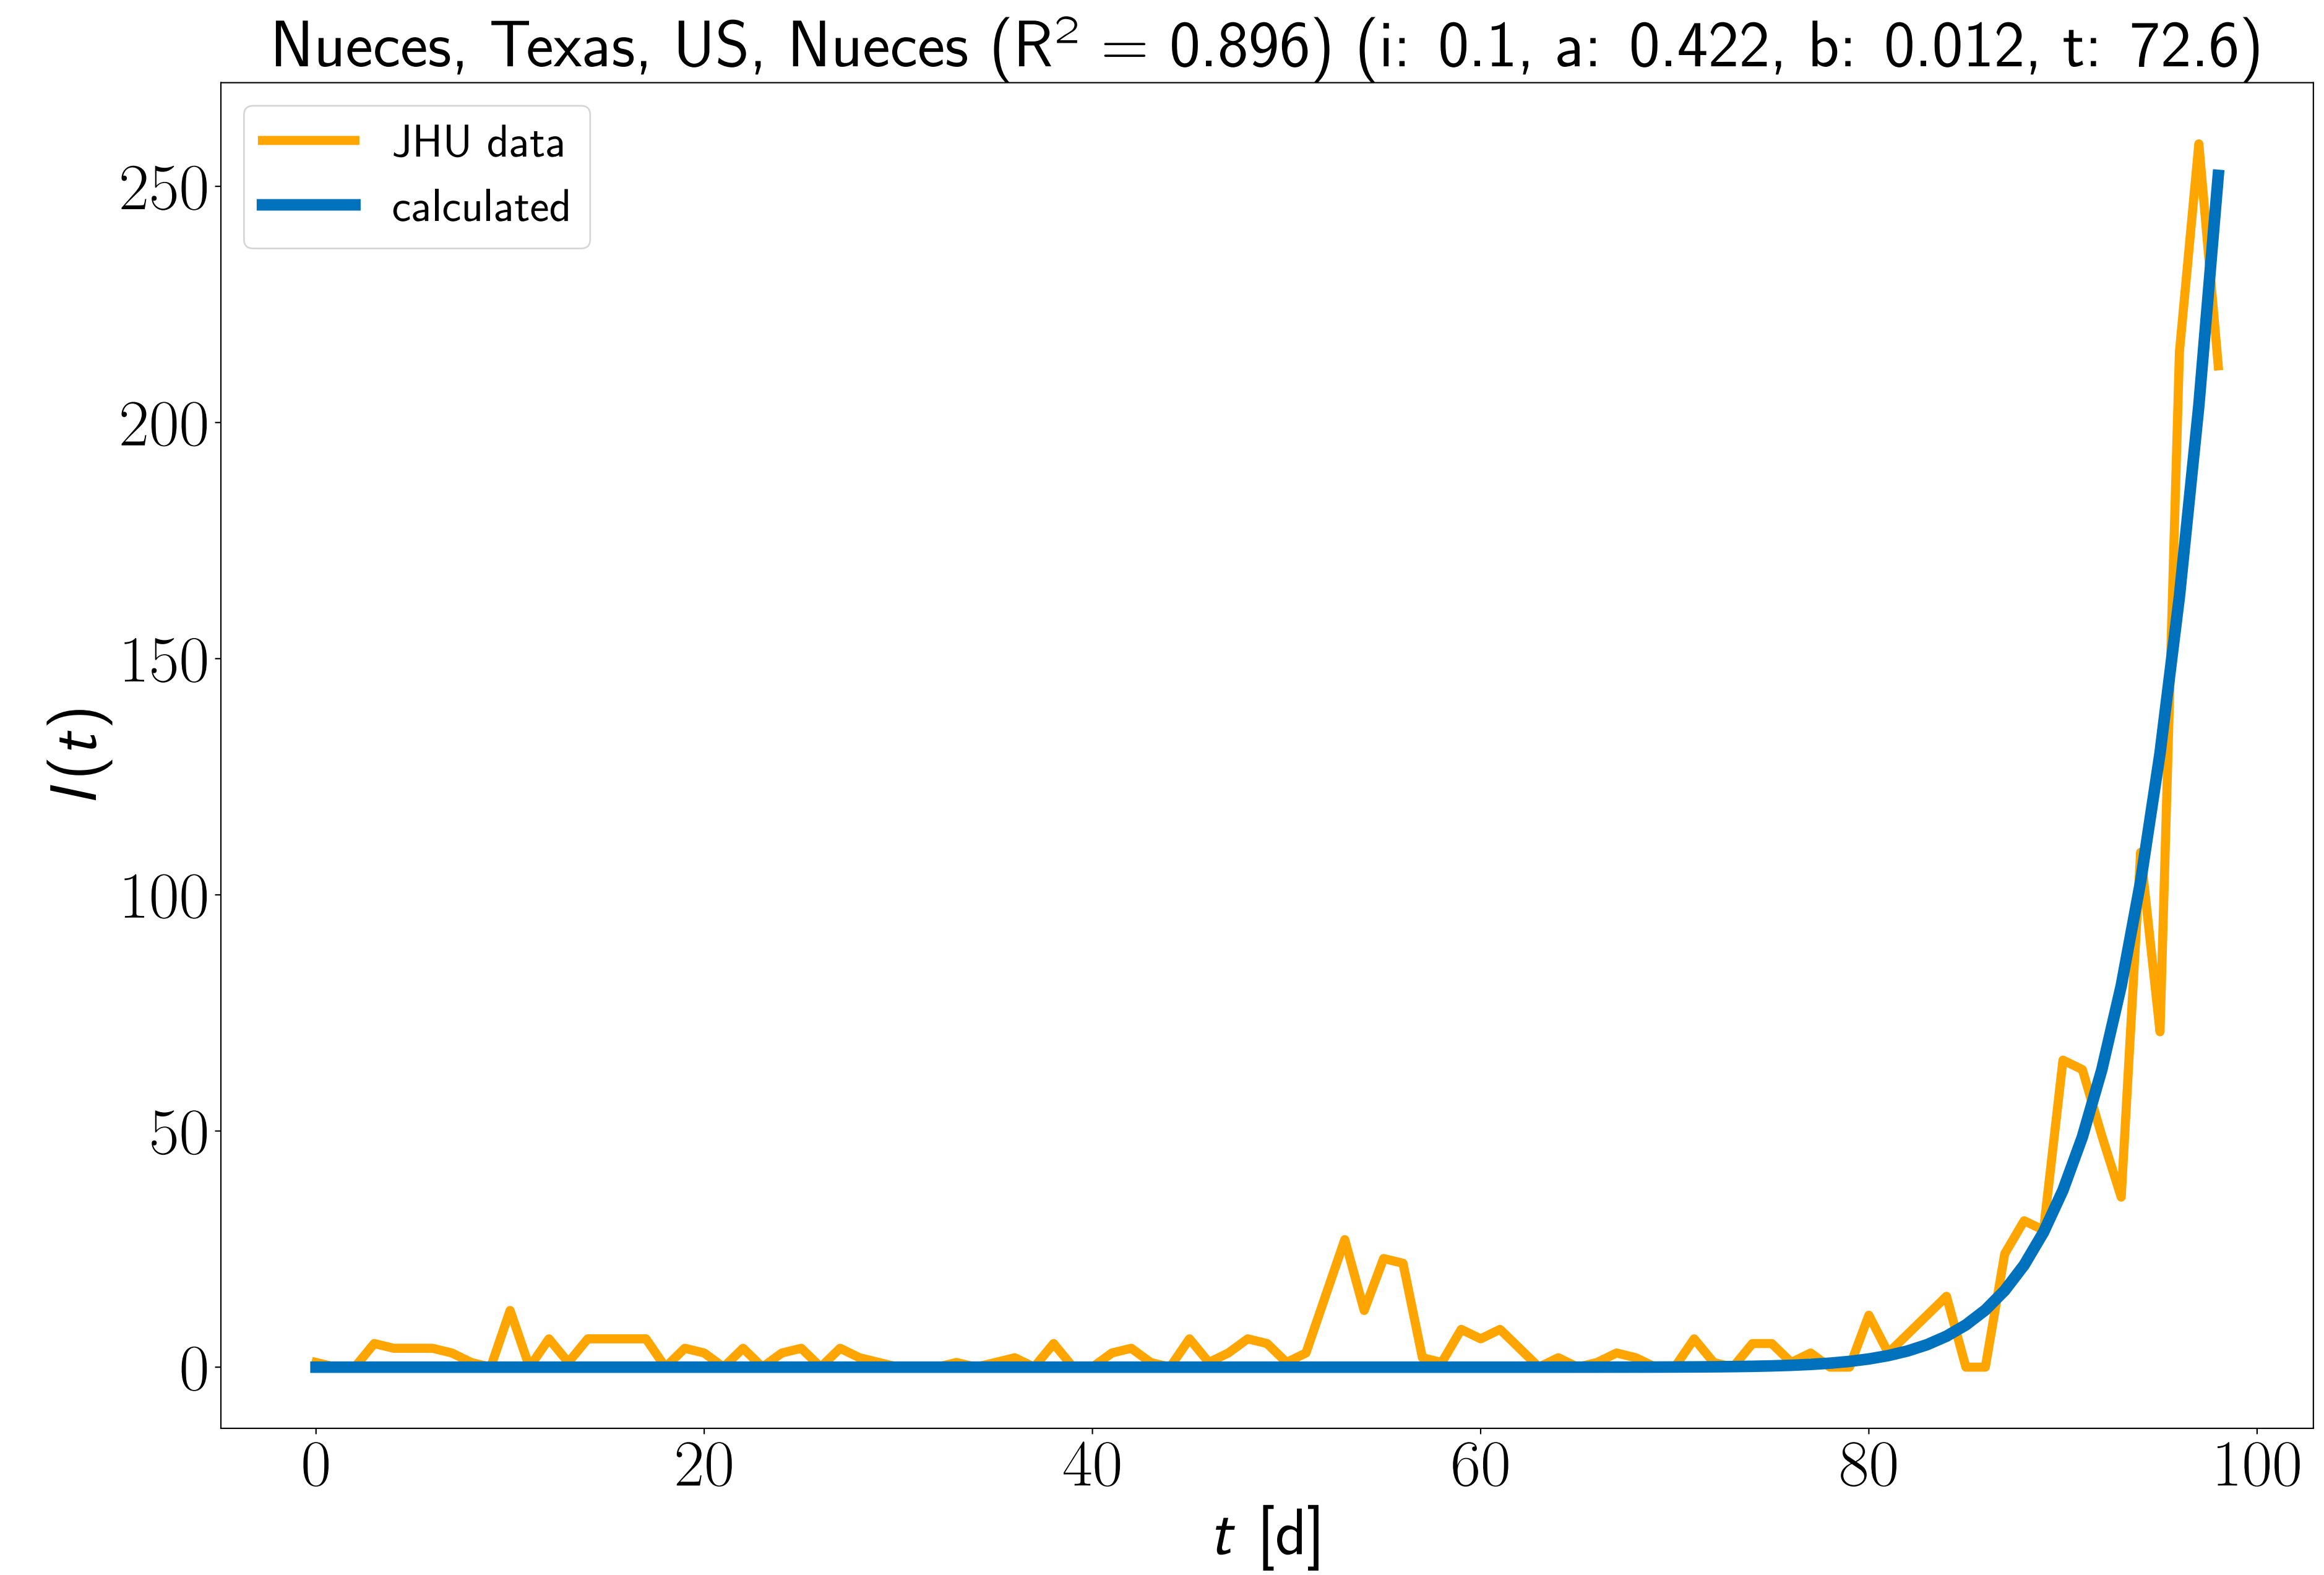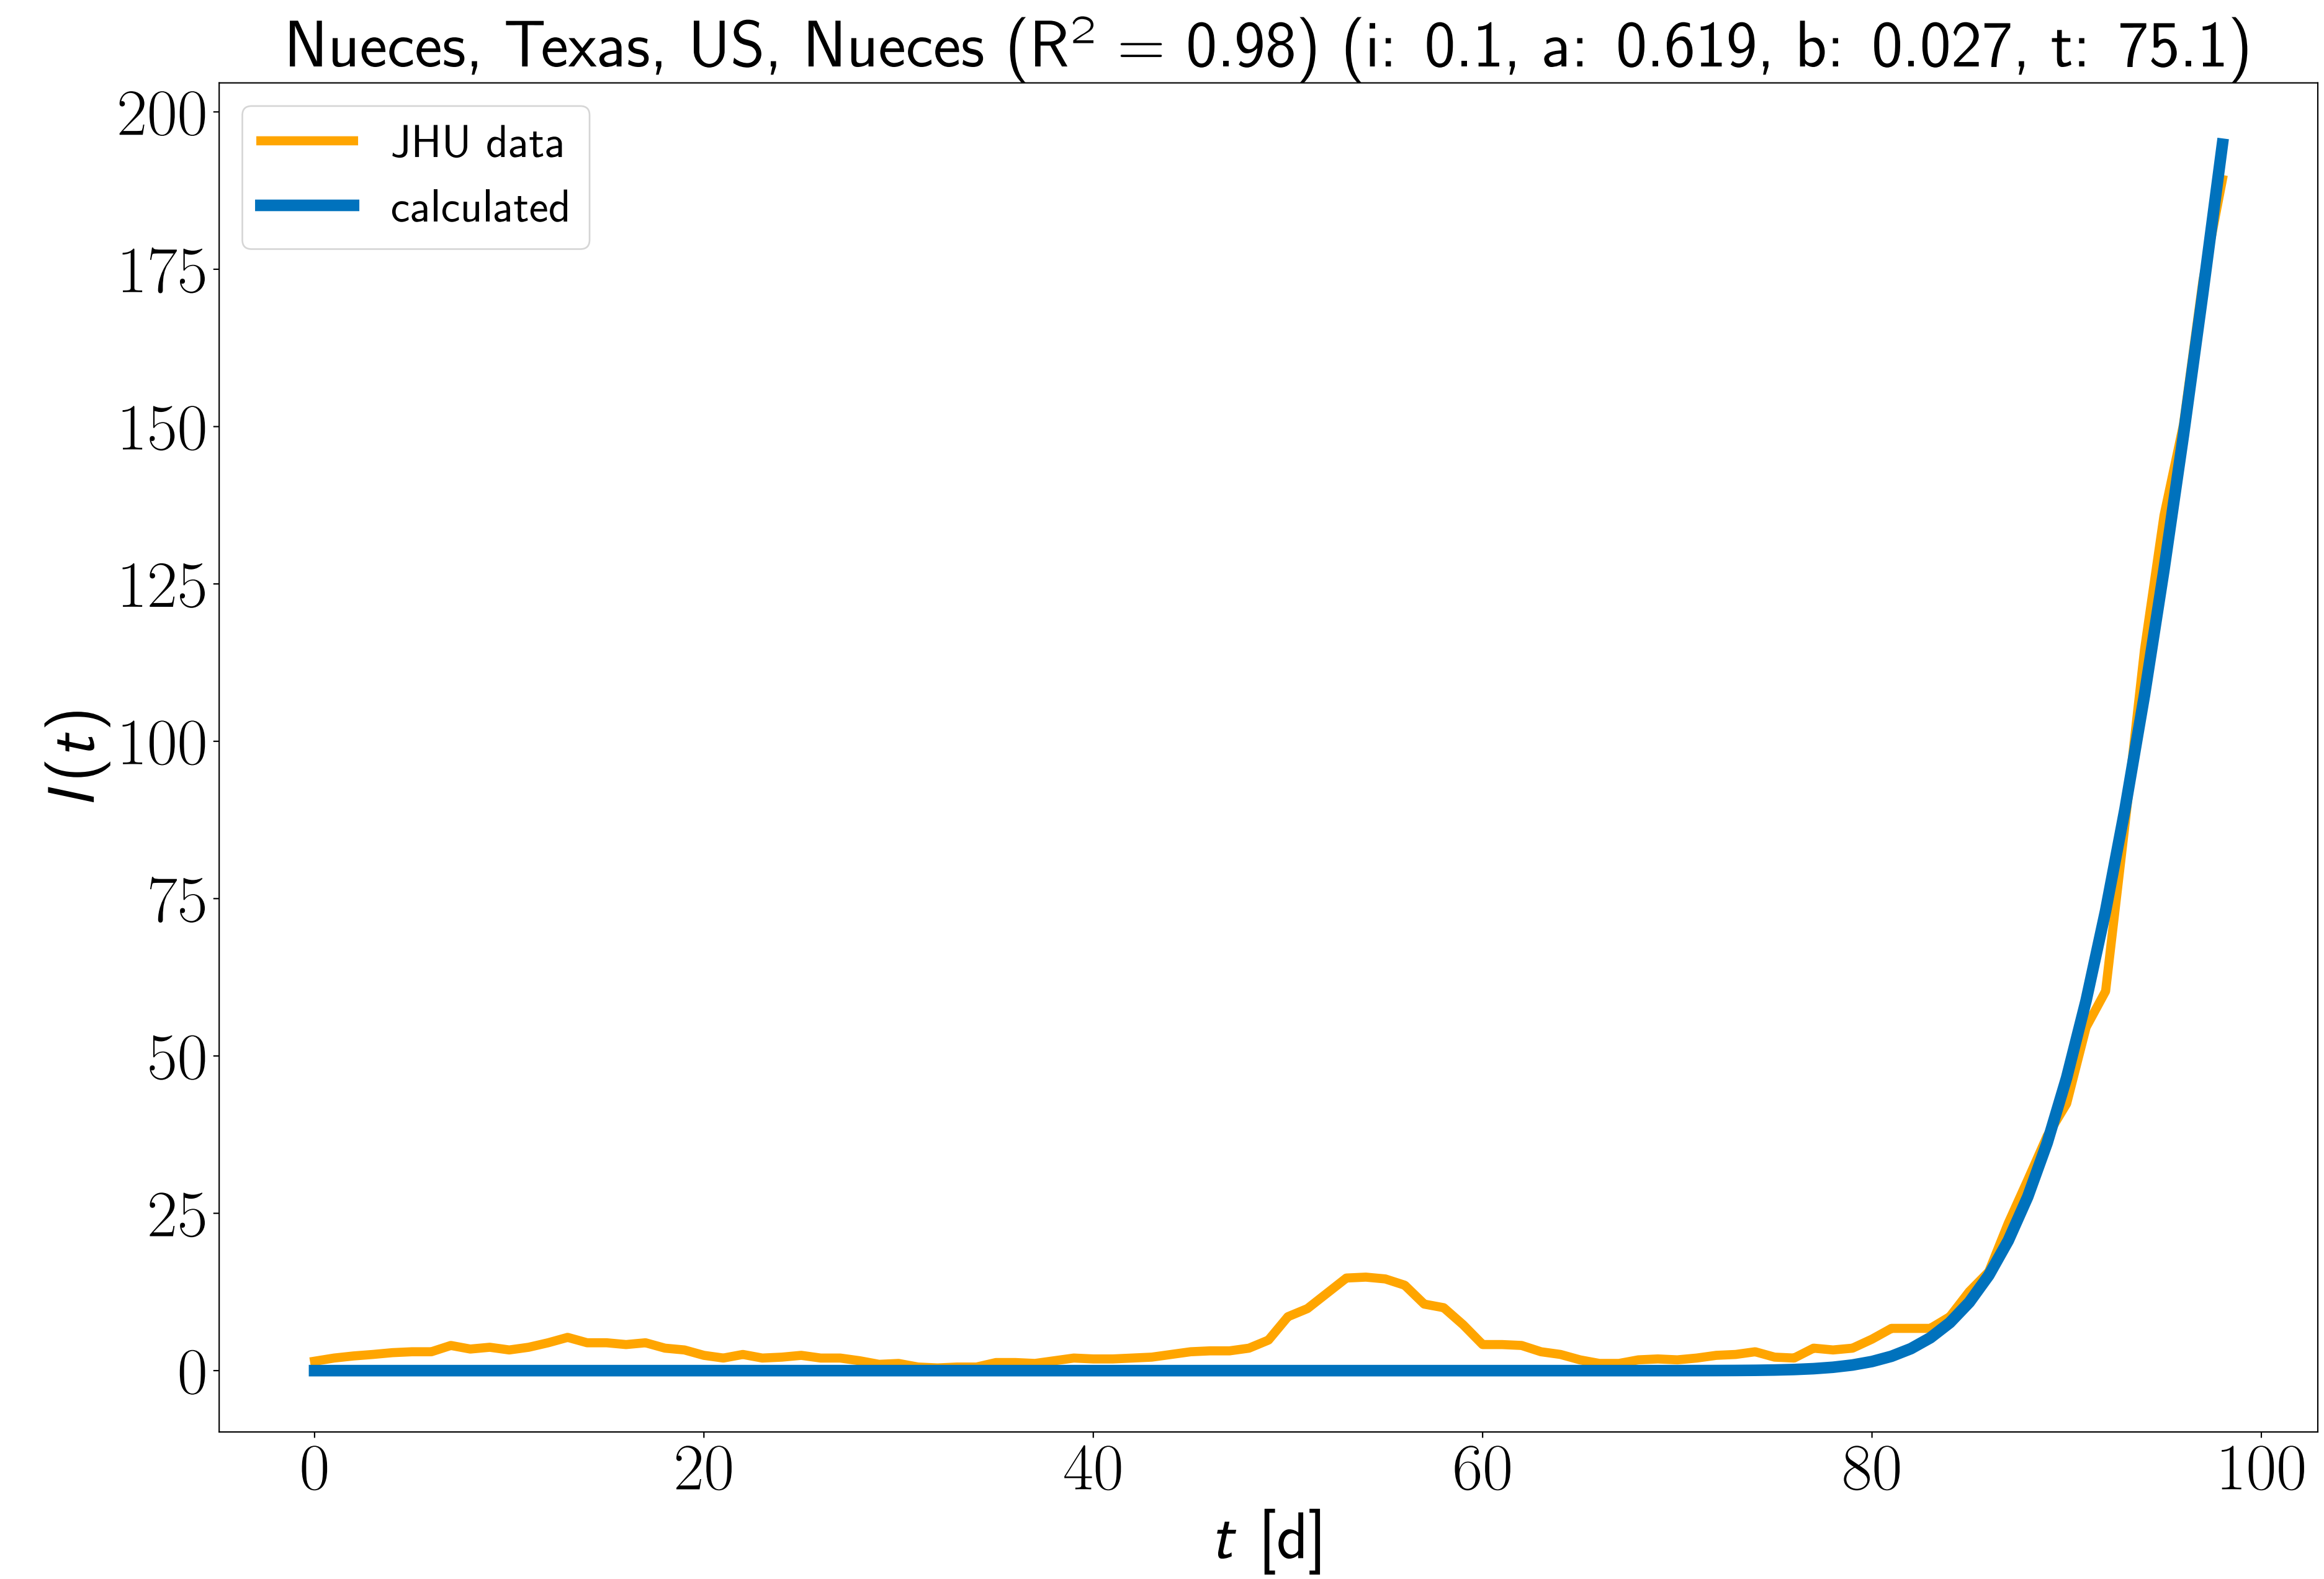

Supplement: Supplementary file 1 [file supplementary]
